# Supplementary material for: The visualization of Orphadata neurology phenotypes
Source: Front Digit Health. 2023 Jan 27;5:1064936. doi: 10.3389/fdgth.2023.1064936 (PMC9911440; doi:10.3389/fdgth.2023.1064936)
Supplement: Supplementary file 1 [file Table1.xlsx]

## Sheet: Sheet1
Rare Neurological Disease	Orphanadata Classification	Column2	Column3	Column4	Column5	Column6	Column7	Column8	Column9	Column10	Column11	Column12	Column13	Column14	Column15	Column16	Column17	Column18	Column19	Column20	Column21	Column22	Column23	Column24	Column25	Column26	Column27	Column28	Column29	Column30	Column31	Column32	Column33	Column34	Column35	Column36	Column37	Column38	Column39	Column40	Column41	Column42	Column43	Column44	Column45	Column46	Column47	Column48	Column49
14q24.1q24.3_microdeletion_syndrome	Rare_neurologic_disease	Thin_upper_lip_vermilion	Hypertelorism	Downslanted_palpebral_fissures	Brachydactyly	Intellectual_disability_mild	Joint_laxity	Abnormal_heart_morphology	Short_thumb	Cryptorchidism	Ectopic_kidney	Smooth_philtrum	Long_philtrum	Prominent_nasal_bridge	Wide_nasal_bridge	Synophrys	Ventricular_septal_defect	Atrial_septal_defect	Truncus_arteriosus	Intestinal_malrotation	Dislocated_radial_head	Short_nose	Pulmonary_artery_atresia	Limited_elbow_extension_and_supination	Midface_retrusion
3-methylglutaconic_aciduria_type_9	Rare_neurologic_disease	Aggressive_behavior	Muscular_hypotonia	Encephalopathy	Muscle_weakness	Failure_to_thrive	Slender_build	Cerebral_atrophy	Status_epilepticus	Increased_serum_lactate	Neurological_speech_impairment	Clonus	Delayed_gross_motor_development	EEG_abnormality	3-Methylglutaconic_aciduria	Diffuse_white_matter_abnormalities	Intellectual_disability_severe	Decreased_activity_of_mitochondrial_ATP_synthase_complex	Delayed_ability_to_walk	Urinary_incontinence	Optic_atrophy	Seizures	Spasticity	Absent_speech	Hyperreflexia	Hypsarrhythmia
3p25.3_microdeletion_syndrome	Rare_neurologic_disease	Motor_delay	Abnormality_of_the_outer_ear	Prominent_nose	Downslanted_palpebral_fissures	Stereotypy	Delayed_speech_and_language_development	Muscular_hypotonia	Absent_speech	Deep_philtrum	Depressed_nasal_bridge	Cleft_palate	Thin_upper_lip_vermilion	Brachycephaly	Epicanthus	Mandibular_prognathia	Short_philtrum	Narrow_forehead	Micrognathia	Sensorineural_hearing_impairment	Anteverted_nares	Microphthalmia	Blepharophimosis	Autistic_behavior	Sacral_dimple	Tapered_finger	2-3_finger_syndactyly	Ataxia	Ventricular_septal_defect	Atrial_septal_defect	Pulmonic_stenosis	Patent_ductus_arteriosus	Coronary_artery_atherosclerosis	Overlapping_toe	Pyloric_stenosis	Generalized_tonic-clonic_seizures	Absence_seizure	Generalized_myoclonic_seizures	Scoliosis	High_narrow_palate	Downturned_corners_of_mouth	Acromesomelia	Skeletal_muscle_atrophy	Knee_flexion_contracture	Congenital_pseudoarthrosis_of_the_clavicle	Attention_deficit_hyperactivity_disorder	Proximal_placement_of_thumb	Broad_hallux	Abnormality_of_thalamus_morphology
4H_leukodystrophy	Rare_neurologic_disease	Hypogonadotrophic_hypogonadism	Abnormality_of_the_dentition	Myopia	Hypodontia	Ataxia	Dysarthria	Dystonia	Cerebral_hypomyelination	Abnormality_of_eye_movement	Delayed_puberty	Tremor	Dysphagia	Abnormality_of_extrapyramidal_motor_function	Drooling	Upper_motor_neuron_dysfunction	Short_stature	Progressive_gait_ataxia	Hyperintensity_of_cerebral_white_matter_on_MRI	Abnormal_saccadic_eye_movements	Gaze-evoked_nystagmus	Delayed_eruption_of_teeth	Growth_hormone_deficiency	Seizures	Mental_deterioration	Cerebellar_atrophy	Dysmetria	Dysdiadochokinesis	Hypoplasia_of_the_corpus_callosum	Abnormality_of_thyroid_physiology	Cataract	Optic_atrophy	Striatal_T2_hyperintensity
9q21.13_microdeletion_syndrome	Rare_neurologic_disease	Cryptorchidism	Hydronephrosis	Abnormal_heart_morphology	Difficulty_walking	Gastrointestinal_dysmotility	Ptosis	Long_palpebral_fissure	Delayed_speech_and_language_development	Hip_dysplasia	Talipes	Scoliosis	Downturned_corners_of_mouth	Inverted_nipples	Vertebral_segmentation_defect	Aplasia/Hypoplasia_of_the_corpus_callosum	Postnatal_growth_retardation	Wide_nasal_ridge	Abnormal_tongue_morphology	Autistic_behavior	Seizures	Craniosynostosis	Gray_matter_heterotopia	Syringomyelia	Polydactyly
9q31.1q31.3_microdeletion_syndrome	Rare_neurologic_disease	Mandibular_prognathia	Broad_nasal_tip	Short_neck	Short_clavicles	Tapered_finger	Intellectual_disability_mild	Dilated_cardiomyopathy	Bicuspid_aortic_valve	Aortic_regurgitation	Abnormal_facial_shape	Highly_arched_eyebrow	Cervical_kyphosis	Hypercholesterolemia	Short_stature	Type_II_diabetes_mellitus	Mild_global_developmental_delay	Broad_chin	Flat_face	Overweight	Renovascular_hypertension	Thick_hair	Small_hand
ABetaL34V_amyloidosis	Rare_neurologic_disease	Behavioral_abnormality	Dementia	Intellectual_disability	Coma	Global_developmental_delay	Stroke	Cerebral_hemorrhage	Migraine	Paresthesia	Sensory_impairment	Abnormality_of_the_cerebral_vasculature
Aceruloplasminemia	Rare_neurologic_disease	Abnormality_of_the_nervous_system	Increased_serum_ferritin	Hypochromic_microcytic_anemia	Refractory_anemia	Abnormal_enzyme/coenzyme_activity	Aceruloplasminemia	Retinal_degeneration	Macular_degeneration	Diabetes_mellitus	Ataxia	Dysarthria	Dystonia	Gait_ataxia	Limb_ataxia	Chorea	Involuntary_movements	Abnormality_of_retinal_pigmentation	Decreased_serum_ceruloplasmin	Decreased_circulating_copper_concentration	Elevated_hepatic_iron_concentration	Decreased_serum_iron	Cognitive_impairment	Facial_grimacing	Torticollis	Nystagmus	Blepharospasm	Apathy	Parkinsonism	Tremor	Congestive_heart_failure	Rigidity	Akinesia	Memory_impairment	Abnormal_corpus_striatum_morphology	Abnormal_pancreas_morphology	Craniofacial_dystonia	Iron_accumulation_in_brain	Abnormal_thalamic_MRI_signal_intensity	Abnormality_of_the_dentate_nucleus	Cirrhosis	Hepatic_fibrosis
Acetazolamide-responsive_myotonia	Rare_neurologic_disease	Ophthalmoparesis	Ophthalmoplegia	Hypothyroidism	Hypertonia	Gait_disturbance	Dysphagia	Myotonia	Myalgia	Muscle_spasm	EMG_abnormality	Skeletal_muscle_hypertrophy	Chest_pain
Acquired_aneurysmal_subarachnoid_hemorrhage	Rare_neurologic_disease	Abnormal_cerebral_artery_morphology	Hypertension	Constriction_of_peripheral_visual_field	Coma	Cerebral_hemorrhage	Vomiting	Nausea	Headache	Memory_impairment	ST_segment_depression	Cognitive_impairment	Hydrocephalus	Visual_impairment	Hypothyroidism	Seizures	Syncope	Congestive_heart_failure	Myocardial_infarction	Left_ventricular_hypertrophy	Leukocytosis	Ischemic_stroke	Progressive_neurologic_deterioration	Increased_CSF_lactate	Cerebral_ischemia	Hyperglycemia	Hypercholesterolemia	Functional_motor_deficit	Prolonged_QTc_interval	Cranial_nerve_paralysis	Alcoholism	Impairment_of_activities_of_daily_living	Hyperglycorrhachia	Hypopituitarism
Acute_bilirubin_encephalopathy	Rare_neurologic_disease	Hepatic_encephalopathy	Neonatal_hyperbilirubinemia	Prolonged_neonatal_jaundice	Abnormal_auditory_evoked_potentials	Sensorineural_hearing_impairment	Abnormal_conjunctiva_morphology	Seizures	Hypertonia	Kernicterus	Hemolytic_anemia	Fever	Central_apnea	Hypoalbuminemia	Feeding_difficulties	Abnormal_thalamic_MRI_signal_intensity	Conjunctival_icterus	Cerebral_palsy	Hypernatremia	Upgaze_palsy	Neonatal_sepsis
Acute_disseminated_encephalomyelitis	Rare_neurologic_disease	Encephalopathy	Diffuse_white_matter_abnormalities	CNS_demyelination	EEG_with_generalized_slow_activity	Behavioral_abnormality	Irritability	Seizures	Ataxia	Mental_deterioration	Abnormal_cerebellum_morphology	Fever	Nausea	Abnormality_of_the_basal_ganglia	Abnormality_of_the_spinal_cord	Cerebral_edema	Headache	Abnormality_of_the_periventricular_white_matter	Increased_CSF_protein	Abnormal_pyramidal_sign	Myelitis	Abnormal_thalamic_MRI_signal_intensity	Abnormal_brainstem_MRI_signal_intensity	Interictal_EEG_abnormality	Disseminated_viral_infection	Anti-myelin_oligodendrocyte_glycoprotein_antibody_positivity	Hypersomnia	CSF_lymphocytic_pleiocytosis	Visual_loss	Aggressive_behavior	Coma	Hemiparesis	Confusion	Muscle_weakness	Vomiting	Neurological_speech_impairment	Sensory_impairment	Respiratory_failure_requiring_assisted_ventilation	Cranial_nerve_paralysis	EEG_with_focal_slow_activity	Obtundation_status	EEG_with_focal_spikes	Eye_movement-induced_pain	Nuchal_rigidity	Optic_neuritis	Involuntary_movements	Viral_hepatitis	Diaphragmatic_paralysis	Hypointensity_of_cerebral_white_matter_on_MRI
Acute_encephalopathy_with_biphasic_seizures_and_late_reduced_diffusion	Rare_neurologic_disease	Loss_of_consciousness	Severe_viral_infection	Seizure_precipitated_by_febrile_infection	Complex_febrile_seizure	Generalized_tonic-clonic_seizures	Seizure_cluster	Uncontrolled_eye_movements	Takotsubo_cardiomyopathy	Increased_circulating_procalcitonin_level	Status_epilepticus_without_prominent_motor_symptoms	Hypointensity_of_cerebral_white_matter_on_MRI	Abnormal_metabolic_brain_imaging_by_MRS
Acute_infantile_liver_failure-cerebellar_ataxia-peripheral_sensory_motor_neuropathy_syndrome	Rare_neurologic_disease	Dysmetric_saccades	Saccadic_smooth_pursuit	Intellectual_disability_mild	Global_developmental_delay	Hyporeflexia	Hepatic_fibrosis	Hepatosplenomegaly	Fever	Gait_ataxia	Progressive_cerebellar_ataxia	Intention_tremor	Frequent_falls	Paresthesia	Sensory_impairment	Acute_hepatic_failure	Cerebellar_vermis_atrophy	Distal_lower_limb_muscle_weakness	Generalized_limb_muscle_atrophy	Peripheral_neuropathy	Stuttering	Optic_atrophy	Spasticity	Hyperreflexia	Talipes_equinovarus	Reduced_visual_acuity
Acute_inflammatory_demyelinating_polyradiculoneuropathy	Rare_neurologic_disease	Acute_demyelinating_polyneuropathy	Hyporeflexia	Generalized_hypotonia	Recurrent_fever	Drooling	Unsteady_gait	EMG:_neuropathic_changes	Sleepy_facial_expression	Distal_lower_limb_muscle_weakness	Dysesthesia	Impaired_oropharyngeal_swallow_response	Onion_bulb_formation	Gait_ataxia
Acute_transverse_myelitis	Rare_neurologic_disease	Muscle_weakness	Abnormality_of_extrapyramidal_motor_function	Increased_CSF_protein	Sensory_impairment	CSF_pleocytosis	Abnormal_autonomic_nervous_system_physiology	Urinary_retention	Urinary_incontinence	Hypertension	Spasticity	Orthostatic_hypotension	Meningitis	Gait_disturbance	Hyperreflexia	Fever	Constipation	Subarachnoid_hemorrhage	Paraparesis	Upper_motor_neuron_dysfunction	Impaired_vibratory_sensation	Gastroparesis	Paralytic_ileus	Immunodeficiency	Systemic_lupus_erythematosus	Urinary_bladder_sphincter_dysfunction	Autoimmunity	Paresthesia	Back_pain	Upper_limb_muscle_weakness	Babinski_sign	Abnormality_of_temperature_regulation	Autonomic_bladder_dysfunction	CNS_demyelination	Distal_lower_limb_muscle_weakness	Muscle_flaccidity	Paraplegia	Impaired_proprioception	Dissociated_sensory_loss	Decreased_circulating_copper_concentration	Hypoglycorrhachia	Fatigue	Dysesthesia	Abscess	Nuchal_rigidity	Severe_viral_infection	Invasive_parasitic_infection	Abnormal_libido	Extrapulmonary_tuberculosis
ACys_amyloidosis	Rare_neurologic_disease	Stroke	Cerebral_hemorrhage	Amyloidosis	Cerebral_amyloid_angiopathy	Death_in_early_adulthood
Adenylosuccinate_lyase_deficiency	Rare_neurologic_disease	Thin_upper_lip_vermilion	Brachycephaly	Microcephaly	Smooth_philtrum	Long_philtrum	Low-set_ears	Anteverted_nares	Intellectual_disability	Seizures	Generalized_hypotonia	Absent_speech	Abnormal_facial_shape	Short_nose	Flat_occiput	Prominent_metopic_ridge	Hypointensity_of_cerebral_white_matter_on_MRI	Severe_global_developmental_delay
Adenylosuccinate_synthetase-like_1-related_distal_myopathy	Rare_neurologic_disease	Unsteady_gait	Difficulty_running	Distal_lower_limb_muscle_weakness	Weakness_of_facial_musculature	Sensory_impairment	Triceps_weakness	Distal_upper_limb_muscle_weakness	Proximal_muscle_weakness_in_lower_limbs	Foot_dorsiflexor_weakness	Tip-toe_gait	Lower_limb_amyotrophy	Upper_limb_amyotrophy	Reduced_tendon_reflexes	Distal_lower_limb_amyotrophy	Quadriceps_muscle_atrophy	Inability_to_walk	Difficulty_climbing_stairs	Decreased_Achilles_reflex	Pseudobulbar_signs	Frequent_falls	Steppage_gait	Quadriceps_muscle_weakness	Impaired_mastication
ADNP_syndrome	Rare_neurologic_disease	Urinary_incontinence	Autistic_behavior	Impaired_social_interactions	Delayed_speech_and_language_development	Global_developmental_delay	Neurological_speech_impairment	Obsessive-compulsive_behavior	Anxiety	Abnormality_of_finger	Joint_laxity	Gastroesophageal_reflux	Polyphagia	Attention_deficit_hyperactivity_disorder	Infantile_muscular_hypotonia	Moderate_global_developmental_delay	Severe_global_developmental_delay	Abnormality_of_brain_morphology	Chronic_constipation	Abnormal_temper_tantrums	Oral-pharyngeal_dysphagia	Recurrent_urinary_tract_infections	Thick_lower_lip_vermilion	Thin_upper_lip_vermilion	Trigonocephaly	Smooth_philtrum	Low-set_ears	Protruding_ear	Astigmatism	Strabismus	Hypermetropia	Aggressive_behavior	Single_transverse_palmar_crease	Plagiocephaly	Bilateral_ptosis	Abnormality_of_the_nail	Abnormality_of_toe	Sandal_gap	Truncal_obesity	Vomiting	Cerebral_atrophy	Hypoplasia_of_the_corpus_callosum	Ventriculomegaly	Sleep_disturbance	Developmental_regression	Recurrent_upper_respiratory_tract_infections	Aspiration	Short_stature	Impaired_mastication
Adult_neuronal_ceroid_lipofuscinosis	Rare_neurologic_disease	Dementia	Seizures	Motor_deterioration	Visual_loss	Abnormal_heart_morphology	Clumsiness	Cognitive_impairment	Granular_osmiophilic_deposits_(GROD)_in_cells	Ataxia	Behavioral_abnormality	Spasticity	Central_sleep_apnea	Progressive_visual_loss	Tremor	Aplasia/Hypoplasia_of_the_cerebellum	Intracellular_accumulation_of_autofluorescent_lipopigment_storage_material	Myoclonus	Mental_deterioration	Abnormality_of_extrapyramidal_motor_function	Abnormal_pyramidal_sign	Fingerprint_intracellular_accumulation_of_autofluorescent_lipopigment_storage_material
Adult-onset_autosomal_dominant_leukodystrophy	Rare_neurologic_disease	Ataxia	Abnormal_autonomic_nervous_system_physiology	Spasticity	Gait_disturbance	Muscle_weakness	Tremor	Hyperreflexia	Gait_ataxia	Upper_motor_neuron_dysfunction	Distal_sensory_impairment	Babinski_sign	Autonomic_bladder_dysfunction	Atrophy_of_the_spinal_cord	Abnormal_auditory_evoked_potentials	Abnormal_pyramidal_sign	Atrophy/Degeneration_affecting_the_brainstem	Abnormality_of_somatosensory_evoked_potentials	Abnormality_of_the_cerebellar_peduncle	Hyperintensity_of_cerebral_white_matter_on_MRI	Recurrent_urinary_tract_infections	Urinary_urgency	Urinary_retention	Abnormality_of_eye_movement	Nystagmus	Impotence	Anhidrosis	Dysarthria	Hypertonia	Orthostatic_hypotension	Dysmetria	Flexion_contracture	Dysphagia	Constipation	Hypothermia	Spastic_gait	Dysdiadochokinesis	Intention_tremor	Clonus	Pseudobulbar_signs	Tetraparesis	Action_tremor	Head_titubation	Myalgia	Functional_motor_deficit	Malnutrition	Temperature_instability	Impaired_distal_vibration_sensation	Upper_limb_postural_tremor
Adult-onset_autosomal_recessive_cerebellar_ataxia	Rare_neurologic_disease	Progressive_cerebellar_ataxia	Abnormal_enzyme/coenzyme_activity	Ptosis	Macular_degeneration	Dysmetric_saccades	Saccadic_smooth_pursuit	Dysarthria	Cerebellar_atrophy	Dysmetria	Hyperreflexia	Brisk_reflexes	Slurred_speech	Pes_cavus	Limb_ataxia	Truncal_ataxia	Generalized-onset_seizure	Fasciculations	EMG_abnormality	Progressive_gait_ataxia	Leg_muscle_stiffness	Downbeat_nystagmus	Ankle_clonus	Tortuosity_of_conjunctival_vessels	Cataract	Diplopia	Horizontal_nystagmus	Intellectual_disability_mild	Intention_tremor
Adult-onset_distal_myopathy_due_to_VCP_mutation	Rare_neurologic_disease	Distal_muscle_weakness	Dementia	Abnormality_of_the_musculature_of_the_lower_limbs	Progressive_neurologic_deterioration	Difficulty_walking	Frequent_falls	Fasciculations	Myalgia	Muscle_spasm	EMG:_myopathic_abnormalities	Scapular_winging	Rimmed_vacuoles	Mildly_elevated_creatine_kinase	Intrinsic_hand_muscle_atrophy	Necrotizing_myopathy	Weakness_of_the_intrinsic_hand_muscles	Foot_dorsiflexor_weakness	Fatty_replacement_of_skeletal_muscle	Urinary_incontinence	Depressivity	Anxiety	Decreased_nerve_conduction_velocity	Parkinsonism	Tremor	Facial_diplegia	Bowel_incontinence	Back_pain	Reduced_vital_capacity	Cardiomyopathy	Proximal_muscle_weakness
Adult-onset_dystonia-parkinsonism	Rare_neurologic_disease	Hypomimic_face	Hypometric_saccades	Eyelid_apraxia	Spasticity	Dysarthria	Tremor	Hyperreflexia	Dysphagia	Rigidity	Bradykinesia	Frontotemporal_dementia	Postural_instability	Neurofibrillary_tangles	Clumsiness	Parkinsonism_with_favorable_response_to_dopaminergic_medication	Focal_dystonia	Frontotemporal_cerebral_atrophy	Generalized_cerebral_atrophy/hypoplasia	Progressive_extrapyramidal_movement_disorder	Dyslexia	Stiff_hip	Abnormal_levels_of_creatine_kinase_in_blood	Supranuclear_gaze_palsy	Depressivity	Delusions	Personality_changes	Seizures	Global_developmental_delay	Dystonia	Myoclonus	Paranoia	Iron_accumulation_in_brain
Adult-onset_nemaline_myopathy	Rare_neurologic_disease	Myopathy	EMG:_myopathic_abnormalities	Nemaline_bodies	Bradykinesia	Myalgia	Upper_limb_muscle_weakness	Increased_variability_in_muscle_fiber_diameter	Neck_flexor_weakness	Type_1_muscle_fiber_predominance	Increased_muscle_lipid_content	Paraproteinemia	High_palate	Narrow_face	Long_face	Micrognathia	Hyporeflexia	Flexion_contracture	Dilated_cardiomyopathy	Neuromuscular_dysphagia	Difficulty_walking	Bulbar_signs	Respiratory_insufficiency_due_to_muscle_weakness	Reduced_vital_capacity	Muscle_stiffness	Lower_limb_muscle_weakness	Muscle_fibrillation	Feeding_difficulties	Mildly_elevated_creatine_kinase	Poor_fine_motor_coordination
AHDC1-related_intellectual_disability-obstructive_sleep_apnea-mild_dysmorphism_syndrome	Rare_neurologic_disease	Delayed_speech_and_language_development	Intellectual_disability	Muscular_hypotonia	Global_developmental_delay	Motor_delay	Strabismus	Abnormality_of_the_vertebral_column	Seizures	Ataxia	Abnormal_corpus_callosum_morphology	Joint_laxity	Failure_to_thrive	Abnormal_facial_shape	Expressive_language_delay	Upper_airway_obstruction	Obstructive_sleep_apnea	Upbeat_nystagmus	Feeding_difficulties	Abnormality_of_brain_morphology	Delayed_ability_to_walk	Hypertelorism	Micrognathia	Hearing_impairment	Low-set_ears	Small_earlobe	Protruding_ear	Deeply_set_eye	Downslanted_palpebral_fissures	Esotropia	Upslanted_palpebral_fissure	Autism	Craniosynostosis	Laryngomalacia	Hypoplasia_of_the_corpus_callosum	EEG_abnormality	Scoliosis	Tracheomalacia	Respiratory_failure_requiring_assisted_ventilation	Depressed_nasal_bridge	Retrocerebellar_cyst	Uplifted_earlobe	Delayed_myelination	Snoring	Mild_myopia	Cerebral_visual_impairment
Alexander_disease	Rare_neurologic_disease	Macrocephaly	Intellectual_disability	Seizures	Spasticity	Agenesis_of_corpus_callosum	Hyperreflexia	Megalencephaly	Failure_to_thrive	Frontal_bossing	Nausea_and_vomiting	Neurological_speech_impairment	Clonus	EEG_abnormality	Sleep_disturbance	Scoliosis	Abnormal_pyramidal_sign	Large_face	Abnormality_of_eye_movement	Ptosis	Nystagmus	Diplopia	Emotional_lability	Depressivity	Hyperhidrosis	Ataxia	Dysarthria	Gait_disturbance	Tremor	Dysphonia	Dysphagia	Constipation	Hypothermia	Dysphasia	Tetraplegia	Cerebral_calcification	Hypotension	Kyphosis	Sleep_apnea	Facial_palsy	Recurrent_singultus	High_palate	Hydrocephalus	Short_neck	Diabetes_mellitus	Hypothyroidism	Hypertension	Precocious_puberty	Osteopenia
Allan-Herndon-Dudley_syndrome	Rare_neurologic_disease	Intellectual_disability	Muscular_hypotonia_of_the_trunk	Narrow_face	Long_face	Delayed_speech_and_language_development	Pectus_excavatum	Ataxia	Spasticity	Choreoathetosis	Dystonia	Hyperreflexia	Failure_to_thrive_in_infancy	Pes_planus	Myopathic_facies	Kyphoscoliosis	Abnormality_of_thyroid_physiology	Skeletal_muscle_atrophy	Abnormal_pyramidal_sign	Pes_valgus	Feeding_difficulties_in_infancy	Brain_atrophy	Delayed_myelination	Delayed_ability_to_walk	Decreased_body_mass_index	Cryptorchidism	Microcephaly	Nystagmus	Seizures	Intellectual_disability_mild	Neonatal_hypotonia	Brisk_reflexes	Flexion_contracture	Decreased_fetal_movement	Abnormality_of_extrapyramidal_motor_function	Intellectual_disability_profound	Intellectual_disability_moderate	Poor_head_control	Limb_hypertonia	Spastic_tetraplegia	Generalized_muscle_weakness	Babinski_sign	Short_stature	Prolonged_neonatal_jaundice	Intellectual_disability_severe	Ankle_clonus	Small_for_gestational_age	Polyhydramnios	Premature_birth
Alpha-B_crystallin-related_late-onset_myopathy	Rare_neurologic_disease	Dysphonia	Dysphagia	Progressive_distal_muscle_weakness	Neck_muscle_weakness	Hyporeflexia	Limb-girdle_muscle_weakness	Axial_muscle_weakness	EMG:_myopathic_abnormalities	Increased_variability_in_muscle_fiber_diameter	Autophagic_vacuoles	Foot_dorsiflexor_weakness	Accumulation_of_muscle_fiber_desmin	Abnormal_levels_of_creatine_kinase_in_blood	Posterior_capsular_cataract	Muscle_fiber_inclusion_bodies	Facial_diplegia	Cardiomyopathy	Difficulty_walking	Respiratory_insufficiency_due_to_muscle_weakness	Muscle_stiffness	Progressive_proximal_muscle_weakness
Alternating_hemiplegia_of_childhood	Rare_neurologic_disease	Gastrointestinal_dysmotility	Abnormality_of_the_gastrointestinal_tract	Episodic_hemiplegia	Esotropia	Exotropia	Nystagmus	Behavioral_abnormality	Delayed_speech_and_language_development	Pallor	Intellectual_disability	Seizures	Ataxia	Dystonia	Failure_to_thrive	Vomiting	Diarrhea	Dysphagia	Constipation	Anorexia	Tetraparesis	Abdominal_distention	Mydriasis	Abnormal_autonomic_nervous_system_physiology	Abnormal_involuntary_eye_movements	Neurodevelopmental_delay	Flushing	Oral-pharyngeal_dysphagia	Facial_hypotonia	High_forehead	Oculomotor_apraxia	Emotional_lability	Aggressive_behavior	Hyperhidrosis	Muscular_hypotonia	Dysarthria	Choreoathetosis	Areflexia	Tremor	Hyperreflexia	Dehydration	Rigidity	Generalized_tonic-clonic_seizures	Chorea	Respiratory_distress	Apnea	Status_epilepticus	Exaggerated_cupid's_bow	Headache
Amish_nemaline_myopathy	Rare_neurologic_disease	Pectus_carinatum	Motor_delay	Neonatal_hypotonia	Tremor	Shoulder_flexion_contracture	Hip_contracture	Progressive_muscle_weakness	EMG:_myopathic_abnormalities	Type_1_muscle_fiber_predominance	Proximal_amyotrophy	Respiratory_insufficiency_due_to_muscle_weakness	Intellectual_disability
Amyotrophic_lateral_sclerosis	Rare_neurologic_disease	Amyotrophic_lateral_sclerosis	Neurodegeneration	Generalized_muscle_weakness	Motor_neuron_atrophy	Xerostomia	Emotional_lability	Depressivity	Anxiety	Spasticity	Dyspnea	Functional_respiratory_abnormality	Respiratory_failure	Skeletal_muscle_atrophy	Muscle_spasm	Paralysis	Fatigue	Pain	Fatigable_weakness_of_bulbar_muscles	Fatigable_weakness_of_swallowing_muscles	Fatigable_weakness_of_respiratory_muscles	Agitation	Nausea_and_vomiting	Laryngospasm
Amyotrophic_lateral_sclerosis_type_4	Rare_neurologic_disease	Distal_muscle_weakness	Skeletal_muscle_atrophy	Babinski_sign	Abnormal_pyramidal_sign	Spastic_paraplegia	Gait_disturbance	Pes_cavus	Sensory_impairment
Andersen-Tawil_syndrome	Rare_neurologic_disease	Muscle_weakness	Periodic_paralysis	Episodic_flaccid_weakness	Abnormality_of_the_dentition	Micrognathia	Prolonged_QT_interval	Abnormal_facial_shape	Ventricular_arrhythmia	Short_stature	Periodic_hypokalemic_paresis	High_palate	Thin_upper_lip_vermilion	Hypertelorism	Facial_asymmetry	Triangular_face	Hypoplasia_of_the_maxilla	Broad_forehead	Low-set_ears	Bulbous_nose	Wide_nasal_bridge	Oligodontia	Dental_crowding	Hyperaldosteronism	Seizures	Specific_learning_disability	Joint_laxity	Growth_delay	Dilated_cardiomyopathy	Torsade_de_pointes	Short_foot	Clinodactyly_of_the_5th_toe	Palpitations	Scoliosis	2-3_toe_syndactyly	Abnormal_T-wave	Bidirectional_ventricular_ectopy	Prolonged_QTc_interval	Persistence_of_primary_teeth	Ventricular_extrasystoles	Polymorphic_and_polytopic_ventricular_extrasystoles	Periodic_hyperkalemic_paralysis	Abnormality_of_dental_color	Short_palpebral_fissure	Neurodevelopmental_delay	Prominent_U_wave	Scaphocephaly	Polymorphic_ventricular_tachycardia	Small_hand
Angelman_syndrome	Rare_neurologic_disease	Microcephaly	Behavioral_abnormality	Autistic_behavior	Inappropriate_laughter	Delayed_speech_and_language_development	Hyperactivity	Seizures	Ataxia	Motor_delay	Tremor	Cerebral_cortical_atrophy	Broad-based_gait	Neurological_speech_impairment	EEG_abnormality	Sleep_disturbance	Poor_speech	Intellectual_disability_severe	Severe_global_developmental_delay	Self-injurious_behavior	Wide_mouth	Astigmatism	Strabismus	Hypopigmentation_of_the_skin	Obesity	Abnormal_facial_shape	Constipation	Gastroesophageal_reflux	Fair_hair	Drooling	Polyphagia	Scoliosis	Sleep-wake_cycle_disturbance	Iris_hypopigmentation	Infantile_muscular_hypotonia	Protruding_tongue	Abnormality_of_the_gastrointestinal_tract	Feeding_difficulties	Recurrent_hand_flapping	Mandibular_prognathia	Ptosis	Hypermetropia	Optic_disc_pallor	Myopia	Keratoconus	Nystagmus	Amblyopia	Optic_atrophy	Widely_spaced_teeth
Angelman_syndrome_due_to_a_point_mutation	Rare_neurologic_disease	Wide_mouth	Widely_spaced_teeth	Hypopigmentation_of_the_skin	Seizures	Intellectual_disability_mild	Obesity	EEG_abnormality	Lower_limb_hyperreflexia	Cessation_of_head_growth	Postnatal_microcephaly	Hypopigmentation_of_hair	Iris_hypopigmentation	Infantile_muscular_hypotonia	Happy_demeanor	Mild_microcephaly	Mandibular_prognathia	Strabismus	Inappropriate_laughter	Ataxia	Global_developmental_delay	Dysphagia	Poor_suck	Heat_intolerance	Broad-based_gait	Gait_imbalance	Neurological_speech_impairment	Drooling	Flat_occiput	Protruding_tongue	Feeding_difficulties	Abnormality_of_movement	Recurrent_hand_flapping	Tongue_thrusting	Abnormal_eating_behavior
Angelman_syndrome_due_to_imprinting_defect_in_15q11-q13	Rare_neurologic_disease	Inappropriate_laughter	Hypopigmentation_of_the_skin	Seizures	Obesity	Abnormal_facial_shape	EEG_abnormality	Polyphagia	Hypopigmentation_of_hair	Iris_hypopigmentation	Feeding_difficulties_in_infancy	Infantile_muscular_hypotonia	Delayed_ability_to_walk	Happy_demeanor	Wide_mouth	Mandibular_prognathia	Behavioral_abnormality	Hyperorality	Short_attention_span	Hyperactivity	Ataxia	Absent_speech	Broad-based_gait	Drooling	Poor_speech	Cessation_of_head_growth	Sleep-wake_cycle_disturbance	Brain_imaging_abnormality
ANK3-related_intellectual_disability-sleep_disturbance_syndrome	Rare_neurologic_disease	Aggressive_behavior	Autistic_behavior	Delayed_speech_and_language_development	Hyperactivity	Muscular_hypotonia	Spasticity	Intellectual_disability_moderate	Sleep_disturbance	Bruxism	Macrocephaly	Seizures	Intellectual_disability_mild	Large_for_gestational_age
Antenatal_multiminicore_disease_with_arthrogryposis_multiplex_congenita	Rare_neurologic_disease	Cryptorchidism	High_palate	Dolichocephaly	Low-set_ears	Prominent_nasal_bridge	Webbed_neck	Short_neck	Single_transverse_palmar_crease	Flexion_contracture	Bell-shaped_thorax	Respiratory_insufficiency	Delayed_gross_motor_development	Scoliosis	Reduced_vital_capacity	Arthrogryposis_multiplex_congenita	Axial_muscle_weakness	Minicore_myopathy	Abnormality_of_the_palpebral_fissures	Clinodactyly	Increased_endomysial_connective_tissue	Kyphosis
Anterior_cutaneous_nerve_entrapment_syndrome	Rare_neurologic_disease	Abdominal_pain	Sensory_impairment	Impaired_tactile_sensation	Hyperhidrosis	Vertigo	Leukocytosis	Nausea	Anorexia	Abdominal_distention	Back_pain	Elevated_erythrocyte_sedimentation_rate	Allodynia	Hyperesthesia	Recurrent_urinary_tract_infections	Inguinal_hernia	Decreased_body_weight	Recurrent_infection_of_the_gastrointestinal_tract
Arachnoiditis	Rare_neurologic_disease	Hydrocephalus	Tinnitus	Hearing_impairment	Abnormality_of_the_eye	Abnormality_of_vision	Sensory_neuropathy	Anhidrosis	Hyporeflexia	Meningitis	Muscle_weakness	Migraine	Arthralgia	Urinary_bladder_sphincter_dysfunction	Paresthesia	Fatigue
Ataxia_with_vitamin_E_deficiency	Rare_neurologic_disease	Visual_impairment	Nystagmus	Abnormality_of_visual_evoked_potentials	Nyctalopia	Sensory_neuropathy	Diabetes_mellitus	Ataxia	Dysarthria	Mental_deterioration	Hypertonia	Areflexia	Gait_disturbance	Dysmetria	Muscle_weakness	Dystonia	Tremor	Hypertrophic_cardiomyopathy	Pes_cavus	Dysdiadochokinesis	Neurological_speech_impairment	Developmental_regression	Scoliosis	Skeletal_muscle_atrophy	Hemiplegia/hemiparesis	Abnormal_pyramidal_sign	Abnormality_of_retinal_pigmentation	Peripheral_neuropathy	Arrhythmia
Ataxia-intellectual_disability-oculomotor_apraxia-cerebellar_cysts_syndrome	Rare_neurologic_disease	Ataxia	Dilated_fourth_ventricle	Intellectual_disability_moderate	Cerebellar_cyst	Cerebellar_dysplasia	Cognitive_impairment	Strabismus	Myopia	Amblyopia	Oculomotor_apraxia	Retinal_atrophy	Global_developmental_delay	Abnormality_of_brainstem_morphology	Inferior_vermis_hypoplasia	Elongated_superior_cerebellar_peduncle	Hypermetropia	Retinal_dystrophy	Nystagmus	Muscular_hypotonia	Head_titubation	Elevated_serum_creatine_kinase	Delayed_speech_and_language_development
Ataxia-oculomotor_apraxia_type_1	Rare_neurologic_disease	Abnormality_of_the_nervous_system	Ataxia	Gait_disturbance	Peripheral_neuropathy	Medial_flaring_of_the_eyebrow
Ataxia-oculomotor_apraxia_type_4	Rare_neurologic_disease	Sensory_impairment	Muscular_dystrophy	Pes_cavus	Distal_lower_limb_muscle_weakness	Cognitive_impairment	Dyscalculia	Dyslexia	Short_attention_span	Obesity	Telangiectasia	Sensorimotor_neuropathy	Kyphoscoliosis	Abnormal_saccadic_eye_movements	Dysarthria	Ataxia	Oculomotor_apraxia	Peripheral_neuropathy	Dystonia	Postural_instability	Abnormality_of_toe	Progressive_distal_muscular_atrophy
Ataxia-pancytopenia_syndrome	Rare_neurologic_disease	Microcephaly	Nystagmus	Ataxia	Cerebellar_atrophy	Gait_disturbance	Hyperreflexia	Splenomegaly	Abnormality_of_neutrophils	Pancytopenia	Hypoplastic_anemia	Neurological_speech_impairment	Recurrent_respiratory_infections	Unsteady_gait	Abnormal_macrophage_morphology	Decreased_antibody_level_in_blood	Acute_myelomonocytic_leukemia	Aplasia/Hypoplasia_of_the_cerebellum	Abnormal_platelet_function
Ataxia-tapetoretinal_degeneration_syndrome	Rare_neurologic_disease	Nystagmus	Ataxia	Muscular_hypotonia	Gait_disturbance	Aplasia/Hypoplasia_of_the_cerebellum	Cognitive_impairment	Visual_impairment	Tapetoretinal_degeneration	Pigmentary_retinopathy
Ataxia-telangiectasia	Rare_neurologic_disease	Abnormal_testis_morphology	Polycystic_ovaries	Strabismus	Abnormality_of_eye_movement	Nystagmus	Diabetes_mellitus	Delayed_puberty	Seizures	Ataxia	Spasticity	Dysarthria	Gait_disturbance	Tremor	Failure_to_thrive	Lymphopenia	Neurological_speech_impairment	Recurrent_respiratory_infections	Premature_graying_of_hair	Neoplasm	Abnormality_of_the_immune_system	Immunodeficiency	Elevated_hepatic_transaminase	Skeletal_muscle_atrophy	Abnormality_of_chromosome_stability	Decreased_antibody_level_in_blood	Short_stature	Cellular_immunodeficiency	Hypopigmentation_of_hair	Type_II_diabetes_mellitus	Prematurely_aged_appearance	Multiple_cafe-au-lait_spots	Aplasia/Hypoplasia_of_the_skin	Aplasia/Hypoplasia_of_the_thymus	Abnormality_of_movement	Cognitive_impairment	Mucosal_telangiectasiae	Telangiectasia_of_the_skin
Ataxia-telangiectasia-like_disorder	Rare_neurologic_disease	Drooling	Frequent_falls	Hyperactive_deep_tendon_reflexes	Sensorimotor_neuropathy	Vertical_nystagmus	Small_posterior_fossa	Short_stature	Ataxia	Mask-like_facies	Slow_saccadic_eye_movements	Oculomotor_apraxia	Dysarthria	Cerebellar_atrophy	Generalized_hypotonia	Dysmetria	Reduced_tendon_reflexes	Cerebellar_vermis_hypoplasia	Dystonia	Gait_ataxia	Chorea	Intention_tremor	Dilated_fourth_ventricle	Orofacial_dyskinesia	Absent_Achilles_reflex	Enlarged_interhemispheric_fissure	Abnormality_of_ocular_smooth_pursuit	Gaze-evoked_nystagmus	Dysmetric_saccades	Delayed_speech_and_language_development	Hypergonadotropic_hypogonadism	Myoclonus	Joint_laxity	Pes_cavus	Dysdiadochokinesis
ATP13A2-related_juvenile_neuronal_ceroid_lipofuscinosis	Rare_neurologic_disease	Rigidity	Dystonia	Myoclonus	Tremor	Bradykinesia	Postural_instability	Diffuse_cerebral_atrophy	Parkinsonism_with_favorable_response_to_dopaminergic_medication	Babinski_sign	Upgaze_palsy	Cognitive_impairment	Dysarthria	Gait_disturbance	Muscle_weakness	Abnormal_caudate_nucleus_morphology	Fatigue	Depressivity	Postural_tremor
ATTRV30M_amyloidosis	Rare_neurologic_disease	Nephropathy	Polyneuropathy	Abnormal_test_result	Impotence	Cardiomyopathy	Cardiomegaly	Atrioventricular_block	Weight_loss	Diarrhea	Constipation	Dysautonomia	Arrhythmia	Constrictive_median_neuropathy	Abnormal_renal_physiology	Vitreous_floaters
Atypical_juvenile_parkinsonism	Rare_neurologic_disease	Inability_to_walk	Slowed_slurred_speech	Intellectual_disability	Seizures	Hyporeflexia	Weak_voice	Pes_cavus	Gait_ataxia	Akinesia	Scoliosis	Involuntary_movements	Abnormal_pyramidal_sign	Short_stepped_shuffling_gait	Leg_muscle_stiffness	Fatigue	Brain_atrophy	Abnormality_of_nervous_system_physiology	Abnormality_of_movement	Myoclonus	Shuffling_gait	Anarthria	Hypomimic_face	Dystonia	Rigidity	Bradykinesia	Postural_instability	Resting_tremor
Atypical_pantothenate_kinase-associated_neurodegeneration	Rare_neurologic_disease	Emotional_lability	Depressivity	Irritability	Spasticity	Dysarthria	Parkinsonism	Hyperreflexia	Rigidity	Limb_dystonia	Upper_motor_neuron_dysfunction	Focal_dystonia	Violent_behavior	Impulsivity	Obsessive-compulsive_behavior	Gait_disturbance	Tremor	Dysphagia	Chorea	Neurological_speech_impairment	Abnormal_pyramidal_sign	Oromandibular_dystonia	Inertia	Cognitive_impairment	Retinopathy	Blindness	Optic_atrophy	Psychosis	Clumsiness	Frequent_falls	Tongue_atrophy
Atypical_progressive_supranuclear_palsy_syndrome	Rare_neurologic_disease	Ophthalmoparesis	Abnormal_pyramidal_sign	Kyphoscoliosis	Dementia	Parkinsonism	Tremor_by_anatomical_site	Bradykinesia	Mental_deterioration	Inappropriate_behavior	Abnormality_of_eye_movement	Focal_dystonia	Dysarthria	Unsteady_gait	Falls	Oculomotor_apraxia	Hyperactive_deep_tendon_reflexes	Extrapyramidal_muscular_rigidity	Rigidity	Tremor	Freezing_of_gait	Speech_articulation_difficulties	Dysgraphia	Fixed_facial_expression	Blepharospasm	Downgaze_palsy	Speech_apraxia	Grammar-specific_speech_disorder	Dyslexia	Functional_motor_deficit
Atypical_Rett_syndrome	Rare_neurologic_disease	Agitation	Autistic_behavior	Poor_eye_contact	Intellectual_disability	Seizures	Gait_disturbance	EEG_abnormality	Sleep_disturbance	Loss_of_speech	Developmental_regression	Abnormal_pattern_of_respiration	Functional_motor_deficit	Involuntary_movements	Feeding_difficulties	Stereotypical_hand_wringing	Abnormality_of_movement	Restrictive_behavior	Impaired_social_interactions	Muscular_hypotonia	Spasticity	Dystonia	Short_foot	Gait_ataxia	Apraxia	Mutism	Inability_to_walk	Episodic_tachypnea	Sudden_episodic_apnea	Abnormal_muscle_tone	Postnatal_microcephaly	Loss_of_ability_to_walk	Severe_global_developmental_delay	Functional_abnormality_of_the_gastrointestinal_tract	Hand_apraxia	Limb_myoclonus	Tongue_thrusting	Small_hand	Inappropriate_laughter	Intellectual_disability_mild	Neonatal_hypotonia	Tremor	Growth_delay	Generalized_myoclonic_seizures	Delayed_gross_motor_development	Scoliosis	Kyphosis	Developmental_stagnation	Impaired_pain_sensation
Autism_spectrum_disorder-epilepsy-arthrogryposis_syndrome	Rare_neurologic_disease	Autistic_behavior	Intellectual_disability_mild	Knee_dislocation	Hip_dysplasia	Hammertoe	Absence_seizure	Intellectual_disability_moderate	Scoliosis	Hip_dislocation	Intellectual_disability_severe
Autosomal_dominant_centronuclear_myopathy	Rare_neurologic_disease	Centrally_nucleated_skeletal_muscle_fibers	Ptosis	Thin_ribs	Generalized_hypotonia	Abnormality_of_the_foot_musculature	Large_for_gestational_age	Decreased_fetal_movement	Polyhydramnios	Delayed_gross_motor_development	Difficulty_walking	EMG:_myopathic_abnormalities	Type_1_muscle_fiber_predominance	Macrocephaly_at_birth	Spontaneous_abortion	Mildly_elevated_creatine_kinase	Proximal_muscle_weakness_in_lower_limbs	Proximal_muscle_weakness_in_upper_limbs	Muscle_fibrillation	Urinary_incontinence	Cryptorchidism	External_ophthalmoplegia	Cavernous_hemangioma	Pyloric_stenosis	Areflexia_of_lower_limbs	Respiratory_insufficiency_due_to_muscle_weakness	Peripheral_axonal_neuropathy	Exercise-induced_myalgia	Calf_muscle_hypertrophy	Neonatal_asphyxia	Malignant_hyperthermia
Autosomal_dominant_cerebellar_ataxia-deafness-narcolepsy_syndrome	Rare_neurologic_disease	Sensorineural_hearing_impairment	Narcolepsy	Optic_atrophy	Abnormality_of_mitochondrial_metabolism	Urinary_incontinence	Cataract	Nystagmus	Depressivity	Sensory_neuropathy	Ataxia	Spasticity	Mental_deterioration	Cerebellar_atrophy	Hyperreflexia	Cerebral_atrophy	Pseudobulbar_signs	Resting_tremor	Head_tremor	Memory_impairment	Primitive_reflex	Abnormality_of_the_cerebral_white_matter	Neuronal_loss_in_central_nervous_system	Abnormality_of_the_cerebrospinal_fluid	Babinski_sign	Predominantly_lower_limb_lymphedema	Dilated_third_ventricle	Atrophy/Degeneration_affecting_the_brainstem	Peripheral_neuropathy
Autosomal_dominant_Charcot-Marie-Tooth_disease_type_2A2	Rare_neurologic_disease	Abnormality_of_the_foot	Sensory_axonal_neuropathy	Absent_Achilles_reflex	EMG:_chronic_denervation_signs	Sensory_impairment	Foot_dorsiflexor_weakness	Abnormality_of_the_hand	Pes_cavus	Frequent_falls	Hand_tremor	Impaired_vibratory_sensation	Areflexia_of_lower_limbs	Paresis_of_extensor_muscles_of_the_big_toe	Distal_sensory_impairment	Muscle_spasm	Difficulty_climbing_stairs	Increased_laxity_of_ankles	Poor_fine_motor_coordination	Impaired_pain_sensation	Difficulty_running	Distal_lower_limb_muscle_weakness	Impaired_temperature_sensation	Foot_pain	Hand_muscle_weakness	Flexion_contracture	Vocal_cord_paralysis	Hoarse_voice	Dysphonia	Abnormality_of_the_spinal_cord	Postural_tremor	Steppage_gait	Paresthesia	Babinski_sign	Quadriceps_muscle_weakness	Absent_patellar_reflexes	Inability_to_walk_by_childhood/adolescence	Distal_lower_limb_amyotrophy	Restless_legs	Upper_limb_pain	Triceps_weakness	Hydrocephalus	Sensorineural_hearing_impairment	Optic_atrophy	Nyctalopia	Scoliosis
Autosomal_dominant_Charcot-Marie-Tooth_disease_type_2E	Rare_neurologic_disease	Gait_disturbance	Abnormality_of_the_foot	Peripheral_axonal_neuropathy	Upper_limb_muscle_weakness	Sensorimotor_neuropathy	Demyelinating_motor_neuropathy	Lower_limb_muscle_weakness	Demyelinating_sensory_neuropathy	Hyporeflexia	Pes_cavus	Talipes_calcaneovalgus	Distal_muscle_weakness	EMG:_myopathic_abnormalities	Sensory_impairment	Distal_amyotrophy	Proximal_muscle_weakness	Difficulty_running	Abnormal_motor_evoked_potentials	Extremely_elevated_creatine_kinase	Decreased/absent_ankle_reflexes	Motor_delay	Inability_to_walk	Steppage_gait	Decreased_nerve_conduction_velocity
Autosomal_dominant_Charcot-Marie-Tooth_disease_type_2F	Rare_neurologic_disease	Reduced_tendon_reflexes	Talipes_equinovarus	Steppage_gait	EMG:_chronic_denervation_signs	EMG:_neuropathic_changes	Peripheral_axonal_neuropathy	Limb_fasciculations	Impaired_pain_sensation	Lower_limb_muscle_weakness	Distal_lower_limb_amyotrophy	Upper_limb_amyotrophy	Impaired_temperature_sensation
Autosomal_dominant_Charcot-Marie-Tooth_disease_type_2K	Rare_neurologic_disease	Decreased_nerve_conduction_velocity	Gait_disturbance	Distal_muscle_weakness	Distal_sensory_impairment	Skeletal_muscle_atrophy	Proximal_muscle_weakness	Hand_muscle_atrophy	Peripheral_demyelination	Arrhythmia	Motor_delay
Autosomal_dominant_Charcot-Marie-Tooth_disease_type_2W	Rare_neurologic_disease	Impaired_vibration_sensation_in_the_lower_limbs	Sensory_impairment	Demyelinating_peripheral_neuropathy	Distal_upper_limb_muscle_weakness	Distal_lower_limb_muscle_weakness	Gait_disturbance	Brisk_reflexes	Abnormality_of_the_foot	Pes_cavus	Steppage_gait	Motor_axonal_neuropathy	Hammertoe	Slender_long_bone	Absent_Achilles_reflex	Impaired_distal_tactile_sensation	Impaired_pain_sensation	Intrinsic_hand_muscle_atrophy	Pain	Tip-toe_gait	Hand_muscle_weakness
Autosomal_dominant_Charcot-Marie-Tooth_disease_type_2Y	Rare_neurologic_disease	Decreased_nerve_conduction_velocity	Gait_disturbance	Pes_cavus	Gait_imbalance	Impaired_vibration_sensation_in_the_lower_limbs	Difficulty_walking	Distal_muscle_weakness	Distal_sensory_impairment	Absent_Achilles_reflex	Peripheral_axonal_neuropathy	Distal_amyotrophy	Poor_fine_motor_coordination	Sensorimotor_neuropathy	Distal_upper_limb_muscle_weakness	Foot_dorsiflexor_weakness	Difficulty_running	Hand_muscle_atrophy	Impaired_tactile_sensation	Behavioral_abnormality	Dysarthria	Reduced_tendon_reflexes	Mood_changes	Hammertoe	Dyspnea	Broad-based_gait	Memory_impairment	Frequent_falls	Lumbar_hyperlordosis	Elevated_serum_creatine_kinase	Steppage_gait	Muscle_spasm	Paresthesia	Difficulty_climbing_stairs	Scapular_winging	Proximal_muscle_weakness	Quadriceps_muscle_weakness	Limited_knee_flexion	Impaired_distal_vibration_sensation	Abolished_vibration_sense	Impaired_pain_sensation	Proximal_muscle_weakness_in_lower_limbs	Proximal_muscle_weakness_in_upper_limbs	Distal_lower_limb_muscle_weakness	Toe_walking
Autosomal_dominant_Charcot-Marie-Tooth_disease_type_2Z	Rare_neurologic_disease	Reduced_tendon_reflexes	Distal_muscle_weakness	Sensory_axonal_neuropathy	Lower_limb_amyotrophy	Mixed_demyelinating_and_axonal_polyneuropathy	Distal_lower_limb_amyotrophy	Distal_lower_limb_muscle_weakness	Abnormality_of_peripheral_somatosensory_evoked_potentials	Intellectual_disability	Gait_disturbance	Specific_learning_disability	Tremor	Difficulty_walking	Upper_motor_neuron_dysfunction	Impaired_vibratory_sensation	Abnormal_peripheral_myelination	Sensory_impairment	Upper_limb_muscle_weakness	Babinski_sign	Distal_amyotrophy	Functional_motor_deficit	Motor_axonal_neuropathy	Decreased_distal_sensory_nerve_action_potential	Proximal_upper_limb_amyotrophy	Difficulty_running	Upper_limb_amyotrophy	Joint_contracture_of_the_hand	Impaired_tactile_sensation	Fatigue	Flexion_contracture_of_finger	Abnormal_motor_nerve_conduction_velocity	Hearing_impairment	Neck_muscle_weakness	Atopic_dermatitis	Global_developmental_delay	Hypertonia	High_pitched_voice	Pes_cavus	Neurological_speech_impairment	Fasciculations	Myokymia	Abnormality_of_the_cerebral_white_matter	Inability_to_walk	Generalized_muscle_weakness	Limb-girdle_muscle_weakness	Muscle_spasm	Proximal_muscle_weakness	Limb-girdle_muscle_atrophy
Autosomal_dominant_congenital_benign_spinal_muscular_atrophy	Rare_neurologic_disease	Muscular_hypotonia	Joint_stiffness	Distal_amyotrophy	Cachexia	Nonprogressive_muscular_atrophy
Autosomal_dominant_dopa-responsive_dystonia	Rare_neurologic_disease	Hearing_impairment	Torticollis	Depressivity	Anxiety	Ataxia	Parkinsonism	Brisk_reflexes	Pes_cavus	Talipes_equinovarus	Rigidity	Gait_ataxia	Bradykinesia	Abnormality_of_extrapyramidal_motor_function	Postural_tremor	Sleep_disturbance	Lower_limb_hyperreflexia	Limb_dystonia	Babinski_sign	Decreased_CSF_homovanillic_acid	Focal_dystonia	Transient_hyperphenylalaninemia	Fatigue	Abnormality_of_the_substantia_nigra	Horizontal_nystagmus	Obsessive-compulsive_behavior	Hypothyroidism	Hypertension	Rheumatoid_arthritis	Impaired_vibration_sensation_in_the_lower_limbs	Paresis_of_extensor_muscles_of_the_big_toe	Scoliosis	Progressive_flexion_contractures	Generalized_dystonia	Intellectual_disability
Autosomal_dominant_Emery-Dreifuss_muscular_dystrophy	Rare_neurologic_disease	Pectus_excavatum	Reduced_tendon_reflexes	Joint_stiffness	Myotonia	Myopathy	Elevated_serum_creatine_kinase	Limb-girdle_muscular_dystrophy	Sprengel_anomaly	Gait_disturbance	Achilles_tendon_contracture	Hypertriglyceridemia	Waddling_gait	Elbow_flexion_contracture	Increased_LDL_cholesterol_concentration	Spinal_rigidity	Back_pain	EMG:_myopathic_abnormalities	Scapular_winging	Rimmed_vacuoles	Decreased_cervical_spine_flexion_due_to_contractures_of_posterior_cervical_muscles	Proximal_upper_limb_amyotrophy	Proximal_lower_limb_amyotrophy	Proximal_muscle_weakness_in_lower_limbs	Proximal_muscle_weakness_in_upper_limbs	Type_1_muscle_fiber_atrophy	Absent_muscle_fiber_emerin	Toe_walking	Ptosis	Muscular_hypotonia	Obesity	Dilated_cardiomyopathy	Atrioventricular_block	Scoliosis	Kyphosis	Hyperlordosis	Supraventricular_arrhythmia	Ichthyosis	Lipodystrophy	Vocal_cord_paralysis	Hypertrophic_cardiomyopathy	Sudden_cardiac_death	Respiratory_insufficiency_due_to_muscle_weakness	Ventricular_escape_rhythm	Intellectual_disability
Autosomal_dominant_epilepsy_with_auditory_features	Rare_neurologic_disease	Focal-onset_seizure	Auditory_hallucinations	EEG_with_focal_epileptiform_discharges	Aphasia	Interictal_epileptiform_activity	Focal_aware_seizure	Visual_hallucinations	Focal_autonomic_seizure	Abnormal_autonomic_nervous_system_physiology	Nocturnal_seizures	Behavioral_abnormality	Depressivity	Generalized_tonic-clonic_seizures	Migraine	Generalized-onset_seizure	Generalized_tonic-clonic_seizures_with_focal_onset	Impulsivity	Intellectual_disability	Brain_imaging_abnormality
Autosomal_dominant_limb-girdle_muscular_dystrophy_type_1A	Rare_neurologic_disease	Shoulder_girdle_muscle_weakness	Proximal_muscle_weakness	Pelvic_girdle_muscle_weakness	Distal_muscle_weakness	Inability_to_walk	Elevated_serum_creatine_kinase	EMG:_myopathic_abnormalities	Difficulty_climbing_stairs	Increased_variability_in_muscle_fiber_diameter	Difficulty_standing	Autophagic_vacuoles	Limited_knee_flexion/extension	Limited_elbow_flexion	Foot_dorsiflexor_weakness	Hip_flexor_weakness	Fatty_replacement_of_skeletal_muscle	Increased_endomysial_connective_tissue	Facial_hypotonia	Dysphagia	Respiratory_insufficiency	Reduced_vital_capacity	Functional_respiratory_abnormality	Respiratory_failure	Reduced_maximal_inspiratory_pressure
Autosomal_dominant_mitochondrial_myopathy_with_exercise_intolerance	Rare_neurologic_disease	Restrictive_ventilatory_defect	Increased_serum_lactate	Ragged-red_muscle_fibers	Exercise_intolerance	Neck_flexor_weakness	Short_stature	Mildly_elevated_creatine_kinase	Proximal_muscle_weakness_in_lower_limbs	Distal_lower_limb_muscle_weakness	Increased_intramyocellular_lipid_droplets	Weakness_of_facial_musculature	Increased_mitochondrial_number	Proximal_muscle_weakness_in_upper_limbs
Autosomal_dominant_nocturnal_frontal_lobe_epilepsy	Rare_neurologic_disease	Nocturnal_seizures	Stereotypy	Paroxysmal_dystonia	Involuntary_movements	Urinary_incontinence	Depressivity	Anxiety	Hyperventilation	Hyperkinetic_seizures	Interictal_epileptiform_activity	EEG_with_focal_spikes	Somnambulism	Confusional_arousal	Increased_theta_frequency_activity_in_EEG	Suicidal_ideation	Cognitive_impairment	Behavioral_abnormality	Intellectual_disability_mild	Psychotic_mentation	Generalized_tonic-clonic_seizures	Attention_deficit_hyperactivity_disorder	Non-rapid_eye_movement_parasomnia
Autosomal_dominant_non-syndromic_intellectual_disability	Rare_neurologic_disease	Intellectual_disability	Stereotypy	Seizures	Muscular_hypotonia	Spasticity	Generalized-onset_seizure	Poor_speech	Intellectual_disability_severe	Feeding_difficulties	Abnormality_of_movement	Cerebral_visual_impairment	Microcephaly	Autistic_behavior	Intellectual_disability_mild	Dystonia	Abnormal_facial_shape	Gastroesophageal_reflux	Cerebral_atrophy	Generalized_tonic-clonic_seizures	Chorea	Hypoplasia_of_the_corpus_callosum	Generalized_myoclonic_seizures	Status_epilepticus	Intellectual_disability_profound	Intellectual_disability_moderate	Leukoencephalopathy	Sleep_disturbance	Focal_impaired_awareness_seizure	Abnormality_of_the_cerebral_white_matter	Scoliosis	Short_stature	Severe_muscular_hypotonia	Dilation_of_lateral_ventricles	Focal-onset_seizure	Oculogyric_crisis	Generalized_tonic_seizures	Atonic_seizure	Gelastic_seizures	Epileptic_spasms	Typical_absence_seizure	Focal_motor_seizure	Gastrostomy_tube_feeding_in_infancy	Widened_subarachnoid_space	Eyelid_myoclonus	Abnormal_morphology_of_the_hippocampus	Bilateral_generalized_polymicrogyria	Dyskinesia	Self-injurious_behavior
Autosomal_dominant_spastic_ataxia_type_1	Rare_neurologic_disease	Supranuclear_gaze_palsy	Hypertonia	Hyperreflexia	Lower_limb_spasticity	Slow_saccadic_eye_movements	Spastic_paraplegia	Dysphagia	Spastic_gait	Limb_ataxia	Memory_impairment	Difficulty_walking	Spastic_dysarthria	Spastic_ataxia	Babinski_sign	Jerky_head_movements	Leg_muscle_stiffness	Abnormal_eyelid_morphology	Ptosis	Dystonia	Tremor	Pes_cavus	Impaired_vibration_sensation_in_the_lower_limbs	Impaired_proprioception	Seizures	Abnormality_of_the_cerebrospinal_fluid	Generalized_amyotrophy
Autosomal_dominant_spastic_paraplegia_type_10	Rare_neurologic_disease	Lower_limb_spasticity	Lower_limb_hyperreflexia	Babinski_sign	Sensorimotor_neuropathy	Upper_limb_amyotrophy	Intellectual_disability_moderate	Parkinsonism	Hearing_impairment	Rod-cone_dystrophy	Distal_sensory_impairment	Peripheral_axonal_neuropathy	Distal_lower_limb_amyotrophy	Cognitive_impairment	Spastic_paraparetic_gait	Ankle_clonus	Paresthesia	Progressive_pes_cavus	Upper_limb_spasticity	Scoliosis	Upper_motor_neuron_dysfunction	Impaired_distal_vibration_sensation	Hyperreflexia_in_upper_limbs	Urinary_urgency	Varicose_veins	Dupuytren_contracture	Leg_muscle_stiffness	Lower_limb_muscle_weakness	Spastic/hyperactive_bladder
Autosomal_dominant_spastic_paraplegia_type_12	Rare_neurologic_disease	Hyperreflexia	Lower_limb_spasticity	Degeneration_of_the_lateral_corticospinal_tracts	Difficulty_walking	Progressive_spastic_paraplegia	Lower_limb_muscle_weakness	Urinary_urgency	Urinary_incontinence	Spastic_gait	Limb_ataxia	Impaired_vibration_sensation_in_the_lower_limbs	Clonus	Muscle_spasm	Babinski_sign	Lower_limb_amyotrophy	Progressive_pes_cavus	Impaired_proprioception	Female_sexual_dysfunction	Male_sexual_dysfunction	Spinal_cord_lesion	Bowel_incontinence	Hyperreflexia_in_upper_limbs	Seizures	Abnormality_of_the_cerebrospinal_fluid	EMG_abnormality	Abnormal_lower-limb_motor_evoked_potentials
Autosomal_dominant_spastic_paraplegia_type_13	Rare_neurologic_disease	Spastic_paraplegia	Urinary_bladder_sphincter_dysfunction	Urinary_incontinence	Hyperreflexia	Lower_limb_spasticity	Spastic_gait	Impaired_vibration_sensation_in_the_lower_limbs	Babinski_sign	Abnormal_pyramidal_sign	Lower_limb_muscle_weakness	Hyperreflexia_in_upper_limbs	Urinary_urgency	Pes_cavus	Scoliosis	Hearing_impairment	Rod-cone_dystrophy
Autosomal_dominant_spastic_paraplegia_type_17	Rare_neurologic_disease	Hyperreflexia	Abnormality_of_the_foot_musculature	Spastic_gait	Babinski_sign	Foot_dorsiflexor_weakness	Hand_muscle_atrophy	Split_hand	Pes_planus	Postural_tremor	Distal_sensory_impairment	Distal_amyotrophy	Hand_muscle_weakness	Hip_pain	Knee_pain	Ankle_weakness	Abnormal_motor_nerve_conduction_velocity
Autosomal_dominant_spastic_paraplegia_type_19	Rare_neurologic_disease	Clonus	Muscle_spasm	Lower_limb_amyotrophy	Impaired_proprioception	Abnormal_lower-limb_motor_evoked_potentials	Female_sexual_dysfunction	Male_sexual_dysfunction	Spinal_cord_lesion	Urinary_urgency	Hyperreflexia	Lower_limb_spasticity	Degeneration_of_the_lateral_corticospinal_tracts	Babinski_sign	Progressive_spastic_paraplegia	Lower_limb_muscle_weakness	Limb_ataxia	Impaired_vibration_sensation_in_the_lower_limbs	Spastic_gait	Difficulty_walking	Hyperreflexia_in_upper_limbs	Progressive_pes_cavus	Seizures	Abnormality_of_the_cerebrospinal_fluid	EMG_abnormality
Autosomal_dominant_spastic_paraplegia_type_29	Rare_neurologic_disease	Lower_limb_hyperreflexia	Babinski_sign	Hearing_impairment	Pes_cavus	Hiatus_hernia	Hyperbilirubinemia	Hernia	Clonus	Impaired_vibratory_sensation	Hyperreflexia_in_upper_limbs	Abnormality_of_the_lower_urinary_tract	Seizures	Abnormality_of_the_rectum	Impaired_proprioception
Autosomal_dominant_spastic_paraplegia_type_3	Rare_neurologic_disease	Lower_limb_spasticity	Lower_limb_hyperreflexia	Babinski_sign	Distal_lower_limb_muscle_weakness	Gait_disturbance	Spastic_gait	Distal_lower_limb_amyotrophy	Ankle_clonus	Urinary_urgency	Motor_delay	Impaired_vibratory_sensation	Peripheral_neuropathy	Toe_walking	Dysarthria	Growth_delay	Rigidity	Bradykinesia	Frequent_falls	Lower_limb_hypertonia	Hyperesthesia
Autosomal_dominant_spastic_paraplegia_type_31	Rare_neurologic_disease	Dysarthria	Spastic_tetraparesis	Dysphagia	Bulbar_signs	Brisk_reflexes	Spastic_gait	Proximal_muscle_weakness_in_lower_limbs	Hypertonia	Gait_disturbance	Pes_cavus	Difficulty_walking	Lower_limb_hyperreflexia	Distal_sensory_impairment	Hyperreflexia_in_upper_limbs	Proximal_lower_limb_amyotrophy	Difficulty_running	Impaired_proprioception	Hand_muscle_weakness
Autosomal_dominant_spastic_paraplegia_type_36	Rare_neurologic_disease	Hyperreflexia	Lower_limb_spasticity	Spastic_gait	Babinski_sign	Progressive_spastic_paraplegia	Urinary_urgency	Urinary_incontinence	Distal_muscle_weakness	Proximal_muscle_weakness	Impaired_distal_proprioception	Impaired_distal_vibration_sensation	Impaired_distal_tactile_sensation	Demyelinating_motor_neuropathy	Impaired_temperature_sensation	Demyelinating_sensory_neuropathy	Strabismus	Arthritis	Pes_cavus	Dementia	Abnormal_brainstem_MRI_signal_intensity
Autosomal_dominant_spastic_paraplegia_type_37	Rare_neurologic_disease	Degeneration_of_the_lateral_corticospinal_tracts	Progressive_spastic_paraplegia	Hyperreflexia	Lower_limb_spasticity	Impaired_vibration_sensation_in_the_lower_limbs	Babinski_sign	Lower_limb_muscle_weakness	Spinal_cord_lesion	Urinary_urgency	Spastic_gait	Clonus	Difficulty_walking	Muscle_spasm	Hyperreflexia_in_upper_limbs	Progressive_pes_cavus	Fatigue	Seizures	Abnormality_of_the_cerebrospinal_fluid	EMG_abnormality	Abnormal_lower-limb_motor_evoked_potentials
Autosomal_dominant_spastic_paraplegia_type_38	Rare_neurologic_disease	Hyperreflexia	Lower_limb_spasticity	Spastic_gait	Degeneration_of_the_lateral_corticospinal_tracts	Thenar_muscle_atrophy	Babinski_sign	Progressive_spastic_paraplegia	Progressive_pes_cavus	First_dorsal_interossei_muscle_weakness	First_dorsal_interossei_muscle_atrophy	Thenar_muscle_weakness	EMG_abnormality	Amyotrophy_of_ankle_musculature	Distal_lower_limb_muscle_weakness	Spinal_cord_lesion	Impaired_vibration_sensation_in_the_lower_limbs	Frontotemporal_cerebral_atrophy	Foot_dorsiflexor_weakness	Cognitive_impairment	Urinary_incontinence	Dementia	Seizures	Abnormality_of_the_cerebrospinal_fluid	Peroneal_muscle_atrophy	Abnormal_lower-limb_motor_evoked_potentials
Autosomal_dominant_spastic_paraplegia_type_4	Rare_neurologic_disease	Urinary_urgency	Spasticity	Brisk_reflexes	Lower_limb_spasticity	Babinski_sign	Functional_motor_deficit	Impaired_vibration_sensation_at_ankles	Lower_limb_muscle_weakness	Leg_muscle_stiffness	Ankle_clonus	Dysarthria	Pes_cavus	Urinary_bladder_sphincter_dysfunction	Distal_amyotrophy	Hyperreflexia_in_upper_limbs	Cognitive_impairment	Intellectual_disability	Seizures	Ataxia
Autosomal_dominant_spastic_paraplegia_type_41	Rare_neurologic_disease	Hyperreflexia	Lower_limb_spasticity	Spastic_gait	Degeneration_of_the_lateral_corticospinal_tracts	Progressive_spastic_paraplegia	Urinary_urgency	Proximal_muscle_weakness	Lower_limb_amyotrophy	Hand_muscle_weakness	Spinal_cord_lesion	Seizures	Abnormality_of_the_cerebrospinal_fluid	EMG_abnormality	Abnormal_lower-limb_motor_evoked_potentials
Autosomal_dominant_spastic_paraplegia_type_42	Rare_neurologic_disease	Hyperreflexia	Lower_limb_spasticity	Spastic_gait	Degeneration_of_the_lateral_corticospinal_tracts	Babinski_sign	Lower_limb_hypertonia	Progressive_spastic_paraplegia	Impaired_vibration_sensation_in_the_lower_limbs	Clonus	Lower_limb_amyotrophy	Lower_limb_muscle_weakness	Spinal_cord_lesion	Progressive_pes_cavus	Seizures	Abnormality_of_the_cerebrospinal_fluid	EMG_abnormality	Abnormal_lower-limb_motor_evoked_potentials
Autosomal_dominant_spastic_paraplegia_type_6	Rare_neurologic_disease	Spastic_paraplegia	Gait_disturbance	Lower_limb_spasticity	Lower_limb_hyperreflexia	Impaired_vibratory_sensation	Babinski_sign	Pes_cavus	Generalized_tonic-clonic_seizures	Skeletal_muscle_atrophy	Limited_hip_movement	Limitation_of_movement_at_ankles	Urinary_incontinence	Postural_tremor
Autosomal_dominant_spastic_paraplegia_type_73	Rare_neurologic_disease	Hyperreflexia	Lower_limb_spasticity	Spastic_gait	Degeneration_of_the_lateral_corticospinal_tracts	Babinski_sign	Progressive_spastic_paraplegia	Urinary_urgency	Urinary_incontinence	Impaired_vibration_sensation_in_the_lower_limbs	Difficulty_walking	EMG_abnormality	Progressive_spastic_paraparesis	Distal_lower_limb_amyotrophy	Distal_lower_limb_muscle_weakness	Abnormal_lower-limb_motor_evoked_potentials	Progressive_pes_cavus	Dementia	Seizures	Abnormality_of_the_cerebrospinal_fluid
Autosomal_dominant_spastic_paraplegia_type_8	Rare_neurologic_disease	Hyperreflexia	Lower_limb_spasticity	Degeneration_of_the_lateral_corticospinal_tracts	Difficulty_walking	Babinski_sign	Progressive_spastic_paraplegia	Urinary_urgency	Urinary_incontinence	Spastic_gait	Limb_ataxia	Impaired_vibration_sensation_in_the_lower_limbs	Limb_dysmetria	Muscle_spasm	Lower_limb_muscle_weakness	Progressive_pes_cavus	Peroneal_muscle_atrophy	Spinal_cord_lesion	Clonus	Upper_limb_spasticity	Abnormality_of_the_cerebrospinal_fluid	EMG_abnormality	Abnormal_lower-limb_motor_evoked_potentials
Autosomal_dominant_spastic_paraplegia_type_9A	Rare_neurologic_disease	Pollakisuria	Spastic_gait	Lower_limb_hyperreflexia	Hyperreflexia_in_upper_limbs	Pes_cavus	Babinski_sign	Lower_limb_hypertonia	Abnormal_pyramidal_sign	Abnormality_of_pain_sensation	Urinary_urgency	Urinary_incontinence	Sensorineural_hearing_impairment	Developmental_cataract	Horizontal_nystagmus	Psychosis	Dementia	Seizures	Abnormal_cerebellum_morphology	Muscle_weakness	Tremor	Mitral_regurgitation	Impaired_vibration_sensation_in_the_lower_limbs	Postural_instability	Enlarged_cisterna_magna	Memory_impairment	Anarthria	Spastic_dysarthria	Abnormality_of_the_cerebral_white_matter	Falls	Muscle_spasm	Low_back_pain	Corpus_callosum_atrophy	Abnormality_of_the_dorsal_column_of_the_spinal_cord	Lower_limb_pain
Autosomal_dominant_spastic_paraplegia_type_9B	Rare_neurologic_disease	Spastic_gait	Postural_tremor	Progressive_neurologic_deterioration	Spastic_dysarthria	Upper_motor_neuron_dysfunction	Progressive_inability_to_walk	Babinski_sign	Hyperactive_patellar_reflex	Motor_polyneuropathy	Progressive_gait_ataxia	Hyperreflexia_in_upper_limbs	Progressive_pes_cavus	Developmental_cataract	Dementia	Muscular_hypotonia	Gastroesophageal_reflux	Elbow_flexion_contracture	Absent_Achilles_reflex	Peripheral_axonal_neuropathy	Focal_dystonia	Atrophy_of_the_spinal_cord
Autosomal_dominant_striatal_neurodegeneration	Rare_neurologic_disease	Dysarthria	Gait_disturbance	Dysphagia	Rigidity	Bradykinesia	Dysdiadochokinesis	Abnormality_of_movement
Autosomal_recessive_ataxia_due_to_PEX10_deficiency	Rare_neurologic_disease	Progressive_cerebellar_ataxia	Motor_axonal_neuropathy	Intellectual_disability_mild	Dysarthria	Limb_ataxia	Truncal_ataxia	Progressive_gait_ataxia	Abnormal_pyramidal_sign	Impaired_smooth_pursuit	Very_long_chain_fatty_acid_accumulation	Abnormality_of_phytanic_acid_metabolism	Diffuse_cerebellar_atrophy	Hyperreflexia	Abnormal_head_movements	Type_II_diabetes_mellitus	Mydriasis	Pes_cavus	Oculomotor_apraxia	Global_developmental_delay
Autosomal_recessive_ataxia_due_to_ubiquinone_deficiency	Rare_neurologic_disease	Cerebellar_atrophy	Progressive_cerebellar_ataxia	Brisk_reflexes	Intellectual_disability_moderate	Developmental_regression	Exercise_intolerance	Proximal_muscle_weakness	Talipes_cavus_equinovarus	Central_hypotonia	Focal_T2_hypointense_basal_ganglia_lesion	Strabismus	Seizures	Myoclonus	Tremor	Hyperreflexia	Increased_serum_lactate	Increased_CSF_lactate	Lactic_acidosis	EMG_abnormality	Abnormal_pyramidal_sign	Neurodevelopmental_delay	Hearing_impairment	Gynecomastia	Dystonia
Autosomal_recessive_axonal_Charcot-Marie-Tooth_disease_due_to_copper_metabolism_defect	Rare_neurologic_disease	Ptosis	Exotropia	Dysarthria	Motor_delay	Areflexia	Facial_diplegia	Pes_planus	Increased_serum_lactate	Impaired_vibration_sensation_in_the_lower_limbs	Clumsiness	Frequent_falls	Fasciculations	Steppage_gait	EMG:_chronic_denervation_signs	Motor_polyneuropathy	Lower_limb_muscle_weakness	Foot_dorsiflexor_weakness	Generalized_limb_muscle_atrophy	Abnormality_of_copper_homeostasis	Cardiomyopathy	Abnormal_levels_of_creatine_kinase_in_blood
Autosomal_recessive_axonal_neuropathy_with_neuromyotonia	Rare_neurologic_disease	Myokymia	Myotonia	EMG:_chronic_denervation_signs	Distal_lower_limb_muscle_weakness	EMG:_myokymic_discharges	Gait_disturbance	Reduced_tendon_reflexes	Abnormality_of_the_foot	Frequent_falls	Elevated_serum_creatine_kinase	Absent_Achilles_reflex	Exercise_intolerance	Exercise-induced_muscle_cramps	Motor_axonal_neuropathy	Motor_polyneuropathy	Limb_fasciculations	Handgrip_myotonia	Fatigable_weakness_of_distal_limb_muscles	Areflexia	Flexion_contracture	Pes_cavus	Achilles_tendon_contracture	Impaired_vibration_sensation_in_the_lower_limbs	Tetraparesis	Writer's_cramp	Progressive_inability_to_walk	Steppage_gait	Sensory_axonal_neuropathy	Paresthesia	Distal_sensory_impairment_of_all_modalities	Muscle_stiffness	Percussion-induced_rapid_rolling_muscle_contractions	Distal_lower_limb_amyotrophy	Intrinsic_hand_muscle_atrophy	Exercise-induced_leg_cramps	Weakness_of_the_intrinsic_hand_muscles	Foot_dorsiflexor_weakness	Peroneal_muscle_atrophy	Weakness_of_long_finger_extensor_muscles	Hand_muscle_atrophy	Hyperhidrosis	Split_hand	Intellectual_disability_mild	Specific_learning_disability	Thoracic_scoliosis	Short_third_metatarsal	Camptodactyly_of_finger
Autosomal_recessive_centronuclear_myopathy	Rare_neurologic_disease	High_palate	Retrognathia	Motor_delay	Generalized_hypotonia	Respiratory_insufficiency	Waddling_gait	Progressive_muscle_weakness	Gowers_sign	Difficulty_climbing_stairs	Generalized_amyotrophy	Difficulty_running	Facial_palsy	Narrow_mouth	Bifid_uvula	Long_face	Protruding_ear	Ophthalmoparesis	Ophthalmoplegia	Delayed_speech_and_language_development	Intellectual_disability_mild	Dysarthria	Areflexia	Facial_diplegia	Dysphonia	Abnormal_heart_valve_morphology	Left_ventricular_hypertrophy	Pes_cavus	Talipes_equinovarus	Abnormal_facial_shape	Hip_contracture	Hyperlordosis	EMG:_decremental_response_of_compound_muscle_action_potential_to_repetitive_nerve_stimulation	Centrally_nucleated_skeletal_muscle_fibers	Scapular_winging	Type_1_muscle_fiber_predominance	Long_fingers
Autosomal_recessive_cerebellar_ataxia_due_to_CWF19L1_deficiency	Rare_neurologic_disease	Oculomotor_apraxia	Synophrys	Horizontal_nystagmus	Delayed_speech_and_language_development	Dysarthria	Global_developmental_delay	Dysmetria	Cerebellar_vermis_hypoplasia	Dystonia	Slurred_speech	Gait_ataxia	Truncal_ataxia	Intention_tremor	Clumsiness	Unsteady_gait	Intellectual_disability_moderate	Frequent_falls	Nonprogressive_cerebellar_ataxia	Babinski_sign	Infantile_muscular_hypotonia	Abnormality_of_the_distal_phalanx_of_the_thumb	Monotonic_speech	Mild_microcephaly	Agenesis_of_corpus_callosum
Autosomal_recessive_cerebellar_ataxia_due_to_STUB1_deficiency	Rare_neurologic_disease	Dysarthria	Cerebellar_atrophy	Limb_ataxia	Truncal_ataxia	Arachnodactyly	Adducted_thumb	Gait_disturbance	Hyperreflexia	Postural_instability	Unsteady_gait	Difficulty_walking	Progeroid_facial_appearance	Impaired_proprioception	Abnormal_motor_evoked_potentials	Hypogonadism	Hearing_impairment	Ophthalmoplegia	Nystagmus	Gaze-evoked_nystagmus	Horizontal_nystagmus	Global_developmental_delay	Cerebellar_hypoplasia	Dysphagia	Lower_limb_spasticity	Rigidity	Neurological_speech_impairment	Postural_tremor	Head_tremor	Memory_impairment	Hand_tremor	Distal_amyotrophy	Hyperactive_deep_tendon_reflexes	Corpus_callosum_atrophy	Speech_apraxia	Ankle_clonus	Parietal_cortical_atrophy	Hypoplasia_of_the_pons	Cognitive_impairment	Glaucoma	Oculomotor_apraxia	Infertility	Hypothyroidism	Oligomenorrhea	Iridocyclitis	Retinal_atrophy	Saccadic_smooth_pursuit	Seizures	Alopecia
Autosomal_recessive_cerebellar_ataxia_with_late-onset_spasticity	Rare_neurologic_disease	Spasticity	Progressive_cerebellar_ataxia	Babinski_sign	Abnormal_saccadic_eye_movements	Nystagmus	Brisk_reflexes	Dysphagia	Lower_limb_spasticity	Gait_ataxia	Spastic_dysarthria	Peripheral_axonal_neuropathy	Sensorimotor_neuropathy	Abnormal_pyramidal_sign	Impaired_proprioception	Urinary_incontinence	Sensorineural_hearing_impairment	Pes_cavus	Cerebral_atrophy	Impaired_vibration_sensation_in_the_lower_limbs	Head_tremor	Scoliosis	Distal_amyotrophy	Intellectual_disability_mild	Truncal_ataxia	Low_levels_of_vitamin_A	Low_levels_of_vitamin_E
Autosomal_recessive_cerebellar_ataxia-epilepsy-intellectual_disability_syndrome_due_to_RUBCN_deficiency	Rare_neurologic_disease	Delayed_speech_and_language_development	Dysarthria	Hyporeflexia	Gait_ataxia	Limb_ataxia	Delayed_gross_motor_development	Saccadic_smooth_pursuit	Intellectual_disability	Seizures	Nystagmus	Postural_instability
Autosomal_recessive_cerebellar_ataxia-epilepsy-intellectual_disability_syndrome_due_to_TUD_deficiency	Rare_neurologic_disease	Intellectual_disability	Seizures	Abnormal_facial_shape	Ataxia	Brachycephaly	Generalized_hypotonia
Autosomal_recessive_cerebellar_ataxia-epilepsy-intellectual_disability_syndrome_due_to_WWOX_deficiency	Rare_neurologic_disease	Nystagmus	Delayed_speech_and_language_development	Dysarthria	Hyporeflexia	Motor_delay	Gait_ataxia	Limb_ataxia	Urinary_bladder_sphincter_dysfunction
Autosomal_recessive_cerebellar_ataxia-movement_disorder_syndrome	Rare_neurologic_disease	Gait_ataxia	Limb_ataxia	Progressive_cerebellar_ataxia	Truncal_ataxia	Abnormal_lower_motor_neuron_morphology	Upper_motor_neuron_dysfunction	Sensory_impairment	Abnormal_pyramidal_sign	Abnormal_visual_fixation	Abnormality_of_eye_movement	Abnormal_saccadic_eye_movements	Dysarthria	Pes_cavus	Unsteady_gait	Fasciculations	Sensorimotor_neuropathy	Hypermetric_saccades	Dyslexia	Impaired_proprioception	Myoclonus
Autosomal_recessive_cerebellar_ataxia-psychomotor_delay_syndrome	Rare_neurologic_disease	Abnormality_of_ocular_smooth_pursuit	Intellectual_disability	Ataxia	Dysarthria	Global_developmental_delay	Cerebellar_atrophy	Gait_disturbance	Limb_ataxia	Truncal_ataxia	Nystagmus	Dysphagia	Unsteady_gait	Gaze-evoked_horizontal_nystagmus
Autosomal_recessive_cerebellar_ataxia-pyramidal_signs-nystagmus-oculomotor_apraxia_syndrome	Rare_neurologic_disease	Nystagmus	Oculomotor_apraxia	Progressive_cerebellar_ataxia	Abnormal_pyramidal_sign	Ptosis	Optic_disc_pallor	Esotropia	Hypometric_saccades	Horizontal_nystagmus	Intellectual_disability_mild	Global_developmental_delay	Generalized_hypotonia	Dysmetria	Growth_delay	Rotary_nystagmus	Pes_planus	Dysdiadochokinesis	Ventriculomegaly	Broad-based_gait	Difficulty_walking	Spastic_dysarthria	Short_stature	Progressive_truncal_ataxia	Progressive_gait_ataxia	Diffuse_cerebellar_atrophy	Hyperreflexia	Poor_speech	Multiple_joint_contractures	Babinski_sign	Retrocerebellar_cyst	Intellectual_disability_severe	Seizures
Autosomal_recessive_cerebelloparenchymal_disorder_type_3	Rare_neurologic_disease	Gaze-evoked_nystagmus	Delayed_speech_and_language_development	Intellectual_disability	Ataxia	Dysarthria	Global_developmental_delay	Dysmetria	Gait_ataxia	Delayed_ability_to_walk	Oculomotor_apraxia	Muscular_hypotonia	Cerebellar_atrophy	Muscle_weakness	Brisk_reflexes	Pes_planus	Poor_motor_coordination	Diffuse_cerebral_atrophy	Cerebellar_vermis_atrophy	Progressive_psychomotor_deterioration	Cognitive_impairment	Ophthalmoplegia	Spasticity	Tremor	Dilated_fourth_ventricle	Enlarged_cisterna_magna	Lactic_acidosis	Short_stature	Peripheral_neuropathy	Impaired_visuospatial_constructive_cognition
Autosomal_recessive_Charcot-Marie-Tooth_disease_with_hoarseness	Rare_neurologic_disease	Peripheral_axonal_degeneration	Impaired_vibratory_sensation	Distal_sensory_impairment	Skeletal_muscle_atrophy	Axonal_loss	Sensorimotor_neuropathy	Decreased_number_of_small_peripheral_myelinated_nerve_fibers	Chronic_axonal_neuropathy	Impaired_pain_sensation	Distal_upper_limb_muscle_weakness	Proximal_muscle_weakness_in_lower_limbs	Proximal_muscle_weakness_in_upper_limbs	Distal_lower_limb_muscle_weakness	Impaired_tactile_sensation	Peripheral_demyelination	Abnormality_of_the_vertebral_column	Split_hand	Areflexia	Reduced_tendon_reflexes	Flexion_contracture	Vocal_cord_paresis	Hoarse_voice	Pes_cavus	Talipes_equinovarus	Unsteady_gait	Frequent_falls	Progressive_inability_to_walk	Quadriceps_muscle_weakness	Impaired_distal_proprioception	Clusters_of_axonal_regeneration	Intrinsic_hand_muscle_atrophy	Peroneal_muscle_weakness	Hand_muscle_weakness	Impaired_tandem_gait	Abnormality_of_the_thorax	Motor_delay	Decreased_nerve_conduction_velocity
Autosomal_recessive_complex_spastic_paraplegia_due_to_Kennedy_pathway_dysfunction	Rare_neurologic_disease	Progressive_spastic_paraplegia	Microcephaly	Moderately_short_stature	Intellectual_disability_mild	Nasal_dysarthic_speech	Delayed_gross_motor_development	Progressive_spasticity	Lower_limb_hyperreflexia	Ankle_clonus	Babinski_sign	Cleft_palate	Bifid_uvula	Hyporeflective_spaces_on_macular_OCT	Retinal_pigment_epithelial_mottling	Progressive_spastic_paraparesis	Functional_motor_deficit	Tetraplegia/tetraparesis	Demyelinating_motor_neuropathy	Seizures	Central_retinal_vessel_vascular_tortuosity	Reduced_visual_acuity	Upper_motor_neuron_dysfunction
Autosomal_recessive_congenital_cerebellar_ataxia_due_to_GRID2_deficiency	Rare_neurologic_disease	Limb_ataxia	Truncal_ataxia	Gaze-evoked_nystagmus	Horizontal_nystagmus	Generalized_hypotonia	Neurological_speech_impairment	Difficulty_walking	Functional_motor_deficit	Cerebellar_vermis_atrophy	Brain_atrophy	Cognitive_impairment
Autosomal_recessive_congenital_cerebellar_ataxia_due_to_MGLUR1_deficiency	Rare_neurologic_disease	Intellectual_disability	Hyperreflexia	Gait_ataxia	Difficulty_standing	Esotropia	Hypometric_saccades	Dysmetria	Dysdiadochokinesis	Neurological_speech_impairment	Limb_dysmetria	Functional_motor_deficit	Abnormality_of_ocular_abduction	Ptosis	Seizures	Polyneuropathy	Absent_speech	Gaze-evoked_horizontal_nystagmus
Autosomal_recessive_dopa-responsive_dystonia	Rare_neurologic_disease	Ptosis	Irritability	Delayed_speech_and_language_development	Ataxia	Lethargy	Motor_delay	Parkinsonism	Myoclonus	Brisk_reflexes	Pes_cavus	Talipes_equinovarus	Constipation	Rigidity	Gait_ataxia	Bradykinesia	Abnormality_of_extrapyramidal_motor_function	Postural_tremor	Hypokinesia	Lower_limb_hyperreflexia	Limb_dystonia	Babinski_sign	Excessive_salivation	Decreased_CSF_homovanillic_acid	Focal_dystonia	Oculogyric_crisis	Central_hypotonia	Feeding_difficulties	Night_sweats	Intellectual_disability_mild	Fever	Generalized_dystonia	Generalized_hypotonia	Progressive_encephalopathy
Autosomal_recessive_Emery-Dreifuss_muscular_dystrophy	Rare_neurologic_disease	Achilles_tendon_contracture	Hypertriglyceridemia	Waddling_gait	Elbow_flexion_contracture	Increased_LDL_cholesterol_concentration	Spinal_rigidity	Back_pain	EMG:_myopathic_abnormalities	Scapular_winging	Rimmed_vacuoles	Decreased_cervical_spine_flexion_due_to_contractures_of_posterior_cervical_muscles	Supraventricular_arrhythmia	Ventricular_escape_rhythm	Proximal_upper_limb_amyotrophy	Proximal_lower_limb_amyotrophy	Proximal_muscle_weakness_in_lower_limbs	Proximal_muscle_weakness_in_upper_limbs	Type_1_muscle_fiber_atrophy	Absent_muscle_fiber_emerin	Toe_walking	Muscular_hypotonia	Obesity	Scoliosis	Kyphosis	Hyperlordosis	Ichthyosis	Lipodystrophy	Intellectual_disability	Pectus_excavatum	Joint_stiffness	Myotonia	Hyporeflexia_of_lower_limbs	Myopathy	Elevated_serum_creatine_kinase	Limb-girdle_muscular_dystrophy	Sprengel_anomaly	Gait_disturbance	Dilated_cardiomyopathy	Sudden_cardiac_death	Atrioventricular_block
Autosomal_recessive_non-syndromic_intellectual_disability	Rare_neurologic_disease	Depressivity	Intellectual_disability_mild	Delayed_speech_and_language_development	Seizures	Global_developmental_delay	Motor_delay	Generalized_hypotonia	Abnormal_facial_shape	Intellectual_disability_moderate	Intellectual_disability_severe	Microcephaly	Autistic_behavior	Stereotypy	Short_attention_span	Hyperactivity	Muscular_hypotonia	Spasticity	Absent_septum_pellucidum	Dystonia	Cerebral_atrophy	Chorea	Hypoplasia_of_the_corpus_callosum	Polymicrogyria	Generalized-onset_seizure	Sleep_disturbance	Poor_speech	Hypsarrhythmia	Cortical_dysplasia	Large_basal_ganglia	Focal-onset_seizure	Multifocal_epileptiform_discharges	Epileptic_spasms	EEG_with_focal_epileptiform_discharges	EEG_with_generalized_epileptiform_discharges	Nasogastric_tube_feeding	Dyskinesia	Cerebral_visual_impairment	Impulsivity
Autosomal_recessive_spastic_ataxia_of_Charlevoix-Saguenay	Rare_neurologic_disease	Urinary_incontinence	Ataxia	Spasticity	Dysarthria	Cerebellar_atrophy	Dysmetria	Abnormal_cerebellum_morphology	Cerebellar_vermis_hypoplasia	Muscle_weakness	Mitral_valve_prolapse	Lower_limb_spasticity	Progressive_cerebellar_ataxia	Hypoplasia_of_the_corpus_callosum	Unsteady_gait	Difficulty_walking	Babinski_sign	Demyelinating_peripheral_neuropathy	Sensorimotor_neuropathy	Abnormal_pyramidal_sign	Abnormality_of_the_pons	Hypermyelinated_retinal_nerve_fibers	Gaze-evoked_horizontal_nystagmus	Peripheral_neuropathy	Abnormality_of_the_cerebellar_peduncle	Parietal_cortical_atrophy	Abnormal_motor_evoked_potentials	Arachnoid_cyst	Behavioral_abnormality	Abnormality_of_the_foot	Dysphagia	Gait_ataxia	Intention_tremor	Impaired_vibratory_sensation	Absent_Achilles_reflex	Distal_amyotrophy	Foot_dorsiflexor_weakness	Impaired_tactile_sensation	Impotence
Autosomal_recessive_spastic_ataxia_with_leukoencephalopathy	Rare_neurologic_disease	Cerebellar_hypoplasia	Hyperreflexia	Spastic_ataxia	Urinary_urgency	Horizontal_nystagmus	Intellectual_disability_mild	Spasticity	Dysmetria	Dystonia	Gait_ataxia	Progressive_cerebellar_ataxia	Cerebral_cortical_atrophy	Leukoencephalopathy	Spastic_dysarthria	Scoliosis	Bilateral_sensorineural_hearing_impairment
Autosomal_recessive_spastic_ataxia-optic_atrophy-dysarthria_syndrome	Rare_neurologic_disease	Optic_atrophy	Dysarthria	Hyperreflexia	Spastic_paraparesis	Babinski_sign	Movement_abnormality_of_the_tongue	Nystagmus	Motor_delay	Myoclonus	Progressive_cerebellar_ataxia	Frequent_falls	Lower_limb_hypertonia	Progressive_gait_ataxia	Upper_limb_hypertonia	Emotional_lability	Hyporeflexia
Autosomal_recessive_spastic_paraplegia_type_11	Rare_neurologic_disease	Intellectual_disability_mild	Mental_deterioration	Specific_learning_disability	Hypoplasia_of_the_corpus_callosum	Progressive_spasticity	Paraparesis	Peripheral_axonal_neuropathy	Sensorimotor_neuropathy	Motor_polyneuropathy	Lower_limb_muscle_weakness	Nystagmus	Behavioral_abnormality	Emotional_lability	Short_attention_span	Saccadic_smooth_pursuit	Ataxia	Dysarthria	Gait_disturbance	Dysphagia	Cerebral_cortical_atrophy	Memory_impairment	Inability_to_walk	EMG:_neuropathic_changes	EMG:_axonal_abnormality	Frontal_cortical_atrophy	Dilation_of_lateral_ventricles	Hyperreflexia_in_upper_limbs	Abnormality_of_pattern_visual_evoked_potentials	Hyperintensity_of_cerebral_white_matter_on_MRI	Strabismus	Visual_impairment	Retinal_degeneration	Psychosis	Dementia	Lymphedema	Seizures	Orthostatic_hypotension	Parkinsonism	Obesity	Pes_cavus	Abnormality_of_extrapyramidal_motor_function	Scoliosis	Distal_amyotrophy	Atrophy_of_the_spinal_cord	Focal_T2_hyperintense_basal_ganglia_lesion	Generalized_limb_muscle_atrophy	Hypothalamic_atrophy	Overweight
Autosomal_recessive_spastic_paraplegia_type_14	Rare_neurologic_disease	Intellectual_disability_mild	Hyperreflexia	Pes_cavus	Spastic_gait	Babinski_sign	Lower_limb_hypertonia	Motor_axonal_neuropathy
Autosomal_recessive_spastic_paraplegia_type_15	Rare_neurologic_disease	Hypoplasia_of_the_corpus_callosum	Functional_abnormality_of_the_bladder	Nystagmus	Pigmentary_retinal_degeneration	Intellectual_disability	Spasticity	Spastic_paraplegia	Dysarthria	Gait_disturbance	Abnormal_cerebellum_morphology	Muscle_weakness	Lower_limb_spasticity	Abnormality_of_extrapyramidal_motor_function	Lower_limb_hyperreflexia	Abnormality_of_the_cerebral_white_matter	Peripheral_axonal_neuropathy	Upper_limb_muscle_weakness	Babinski_sign	Upper_limb_spasticity	Pseudobulbar_paralysis	Demyelinating_peripheral_neuropathy	Leg_muscle_stiffness	Retinal_flecks	Yellow/white_lesions_of_the_retina	Deep_cerebral_white_matter_hyperdensities	Cognitive_impairment	Phenotypic_abnormality	Abnormality_of_eye_movement	Behavioral_abnormality	Dementia	Diabetes_mellitus	Saccadic_smooth_pursuit	Seizures	Specific_learning_disability	Pes_cavus	Frontotemporal_dementia	Hand_tremor	Impaired_vibratory_sensation	Distal_amyotrophy
Autosomal_recessive_spastic_paraplegia_type_18	Rare_neurologic_disease	Intellectual_disability	Global_developmental_delay	Hyperreflexia	Flexion_contracture	Distal_muscle_weakness	Inability_to_walk	Elbow_flexion_contracture	Knee_flexion_contracture	Ankle_flexion_contracture	Hyperreflexia_in_upper_limbs	Bilateral_wrist_flexion_contracture	Wide_mouth	Macroglossia	Spasticity	Absent_speech	Hypoplasia_of_the_corpus_callosum	Babinski_sign	High_palate	Short_philtrum	Abnormality_of_the_pinna	Thick_eyebrow	Synophrys	Horizontal_nystagmus	Seizures	Rotary_nystagmus	Dysphagia	Impaired_vibration_sensation_in_the_lower_limbs	Hand_tremor	Hip_contracture	Spinal_rigidity	Flexion_contracture_of_toe	Restricted_neck_movement_due_to_contractures	Ankle_clonus	Abnormality_of_the_lumbar_spine
Autosomal_recessive_spastic_paraplegia_type_20	Rare_neurologic_disease	Hypertelorism	Delayed_speech_and_language_development	Abnormality_of_the_skeletal_system	Abnormality_of_the_hand	Spasticity	Dysarthria	Global_developmental_delay	Motor_delay	Generalized_hypotonia	Abnormal_cerebellum_morphology	Specific_learning_disability	Hyperreflexia	Slurred_speech	Joint_hypermobility	Growth_delay	Abnormality_of_the_foot	Dysphagia	Constipation	Spastic_paraparesis	Spastic_dysarthria	Impaired_vibratory_sensation	Skeletal_muscle_atrophy	Upper_limb_muscle_weakness	Babinski_sign	Short_stature	Abnormal_hand_morphology	Overbite	Abnormality_of_brain_morphology	Dysuria	Cognitive_impairment	Microcephaly	Epicanthus	Low-set_ears	Prominent_nose	Downslanted_palpebral_fissures	Psychosis	Emotional_lability	Hallucinations	Anxiety	Abnormal_thumb_morphology	Hoarse_voice	Pes_cavus	Spastic_gait	Sleep_disturbance	Genu_valgum	Distal_amyotrophy	Abnormality_of_the_nares	Speech_apraxia
Autosomal_recessive_spastic_paraplegia_type_21	Rare_neurologic_disease	Dementia	Difficulty_walking	Abnormal_pyramidal_sign	Spasticity	Global_developmental_delay	Mental_deterioration	Gait_disturbance	Hyperreflexia	Dysphagia	Hypoplasia_of_the_corpus_callosum	Apraxia	Primitive_reflex	Abnormality_of_peripheral_nerve_conduction	Frontotemporal_cerebral_atrophy	Lower_limb_muscle_weakness	Dysgraphia	Personality_disorder	Abnormal_cerebellum_morphology	Abnormality_of_extrapyramidal_motor_function
Autosomal_recessive_spastic_paraplegia_type_23	Rare_neurologic_disease	Multiple_lentigines	Vitiligo	Spastic_paraplegia	Hyperreflexia	Spastic_gait	Waddling_gait	Bowel_incontinence	Kyphoscoliosis	Bowel_urgency	Horseshoe_kidney	Seizures	Silver-gray_hair	Hip_dislocation	Short_stature
Autosomal_recessive_spastic_paraplegia_type_24	Rare_neurologic_disease	Spasticity	Spastic_paraplegia	Hyperreflexia	Clonus	Scissor_gait	Tip-toe_gait	Sensorineural_hearing_impairment
Autosomal_recessive_spastic_paraplegia_type_25	Rare_neurologic_disease	Paraparesis	Herniation_of_intervertebral_nuclei	Sensory_neuropathy	Spastic_paraplegia	Lower_limb_pain	Neck_pain	Developmental_cataract	Developmental_glaucoma	Abnormality_of_peripheral_nerve_conduction	Sensorimotor_neuropathy	Cervical_spondylosis	Upper_limb_pain	Abnormality_of_the_lumbar_spine
Autosomal_recessive_spastic_paraplegia_type_26	Rare_neurologic_disease	Intellectual_disability	Gait_disturbance	Muscle_weakness	Hyperreflexia	Lower_limb_spasticity	Cerebral_cortical_atrophy	Skeletal_muscle_atrophy	Babinski_sign	Sensorimotor_neuropathy	Hyperintensity_of_cerebral_white_matter_on_MRI	Abnormality_of_the_urinary_system	Cataract	Abnormal_cerebellum_morphology	Dystonia	Pes_cavus	Scoliosis	Impaired_vibration_sensation_at_ankles	Pseudobulbar_paralysis	Dyskinesia	Hyporeflexia	Premature_ovarian_insufficiency	Decreased_serum_testosterone_level
Autosomal_recessive_spastic_paraplegia_type_27	Rare_neurologic_disease	Spastic_paraplegia	Lower_limb_hyperreflexia	Babinski_sign	Spastic/hyperactive_bladder	Impaired_vibration_sensation_at_ankles	Dysarthria	Dysdiadochokinesis	Abnormality_of_somatosensory_evoked_potentials	Sensorineural_hearing_impairment
Autosomal_recessive_spastic_paraplegia_type_28	Rare_neurologic_disease	Hyperreflexia	Babinski_sign	Pes_cavus	Lower_limb_spasticity	Rigidity	Spastic_gait	Postural_instability	Unsteady_gait	Scoliosis	Abolished_vibration_sense	Pain_insensitivity	Lower_limb_muscle_weakness	Impaired_tactile_sensation
Autosomal_recessive_spastic_paraplegia_type_32	Rare_neurologic_disease	Cerebellar_cortical_atrophy	Difficulty_walking	Intellectual_disability_mild	Abnormality_of_the_pons	Progressive_spastic_paraplegia	Lower_limb_hyperreflexia	Specific_learning_disability	Progressive_peripheral_neuropathy	Hypoplasia_of_the_corpus_callosum	Pes_cavus	Progressive_spasticity	Impaired_vibration_sensation_in_the_lower_limbs	Babinski_sign
Autosomal_recessive_spastic_paraplegia_type_35	Rare_neurologic_disease	Spastic_paraplegia	Hyperreflexia	Lower_limb_spasticity	Difficulty_walking	Babinski_sign	Foot_dorsiflexor_weakness	Oculomotor_apraxia	Intellectual_disability	Dysarthria	Mental_deterioration	Cerebellar_atrophy	Spastic_tetraparesis	Dysmetria	Dysdiadochokinesis	Hypoplasia_of_the_corpus_callosum	Frequent_falls	Lower_limb_hypertonia	Generalized_dystonia	Atrophy/Degeneration_affecting_the_brainstem	Corpus_callosum_atrophy	Peripheral_demyelination	Ankle_clonus	Cognitive_impairment	Urinary_incontinence	Mask-like_facies	Neck_muscle_weakness	Seizures	Cerebral_cortical_atrophy	Bowel_incontinence	Kyphosis	Positional_foot_deformity	Pontocerebellar_atrophy	Enuresis_nocturna	Iron_accumulation_in_globus_pallidus	Pollakisuria	Ophthalmoplegia	Optic_atrophy
Autosomal_recessive_spastic_paraplegia_type_39	Rare_neurologic_disease	Spastic_paraplegia	Hyperreflexia	Lower_limb_spasticity	Babinski_sign	Atrophy_of_the_spinal_cord	Motor_axonal_neuropathy	Generalized_limb_muscle_atrophy	Cerebellar_atrophy	Gait_ataxia
Autosomal_recessive_spastic_paraplegia_type_43	Rare_neurologic_disease	Spastic_gait	Spastic_paraparesis	Difficulty_walking	Distal_muscle_weakness	Babinski_sign	Distal_amyotrophy	Poor_fine_motor_coordination	Spasticity	Generalized_hypotonia	Brisk_reflexes	Pes_cavus	Impaired_vibratory_sensation	Absent_Achilles_reflex	Knee_flexion_contracture	Ankle_flexion_contracture	Hyperactive_patellar_reflex	Flexion_contracture_of_finger
Autosomal_recessive_spastic_paraplegia_type_44	Rare_neurologic_disease	Strabismus	Abnormality_of_visual_evoked_potentials	Ataxia	Dysarthria	Pes_cavus	Lower_limb_spasticity	CNS_hypomyelination	Abnormal_auditory_evoked_potentials	Abnormality_of_somatosensory_evoked_potentials	Abnormal_motor_evoked_potentials	Sensorineural_hearing_impairment	Seizures	Difficulty_walking	Urinary_bladder_sphincter_dysfunction	Sensory_impairment	Delayed_gross_motor_development
Autosomal_recessive_spastic_paraplegia_type_45	Rare_neurologic_disease	Intellectual_disability	Spastic_paraplegia	Lower_limb_spasticity	Spastic_gait	Babinski_sign	Flexion_contracture_of_toe	Knee_flexion_contracture	Ankle_flexion_contracture	Global_developmental_delay	Motor_delay	Hyperreflexia	Pendular_nystagmus	Myopia	Optic_atrophy
Autosomal_recessive_spastic_paraplegia_type_46	Rare_neurologic_disease	Cataract	Ataxia	Lower_limb_spasticity	Difficulty_walking	Babinski_sign	Cerebellar_atrophy	Cerebral_atrophy	Cerebral_cortical_atrophy	Abnormality_of_the_cerebral_white_matter	Corpus_callosum_atrophy	Cognitive_impairment	Urinary_incontinence	Hearing_impairment	Nystagmus	Dementia	Infertility	Hyperreflexia	Pes_cavus	Truncal_ataxia	Broad-based_gait	Head_tremor	Spastic_dysarthria	Scoliosis	Peripheral_axonal_neuropathy	Impaired_vibration_sensation_at_ankles	Upper_limb_spasticity	Abnormal_pyramidal_sign	Jerky_ocular_pursuit_movements	Decreased_testicular_size	Reduced_sperm_motility	Abnormal_sperm_morphology	Sperm_head_anomaly	Abnormal_tendon_morphology
Autosomal_recessive_spastic_paraplegia_type_48	Rare_neurologic_disease	Hypoplasia_of_the_corpus_callosum	Progressive_spastic_paraplegia	Urinary_incontinence	Intellectual_disability	Ataxia	Myoclonus	Hyperreflexia	Lower_limb_spasticity	Spastic_gait	Urinary_bladder_sphincter_dysfunction	Elevated_serum_creatine_kinase	Abnormality_of_the_cervical_spine	Lower_limb_muscle_weakness	Hyperintensity_of_cerebral_white_matter_on_MRI	Cognitive_impairment	Retinopathy	Parkinsonism	Broad-based_gait	Peripheral_neuropathy
Autosomal_recessive_spastic_paraplegia_type_53	Rare_neurologic_disease	Impaired_proprioception	Clonus	Hyperreflexia_in_upper_limbs	Delayed_speech_and_language_development	Pectus_carinatum	Kyphosis	Joint_hyperflexibility	Upper_limb_hypertonia	Hearing_impairment	Limb_dystonia	Impaired_vibratory_sensation	Microcephaly	Abnormality_of_the_auditory_canal	Failure_to_thrive	Ventriculomegaly	Cortical_dysplasia
Autosomal_recessive_spastic_paraplegia_type_54	Rare_neurologic_disease	Intellectual_disability	Spastic_paraplegia	Global_developmental_delay	Strabismus	Dysarthria	Gait_disturbance	Dysphagia	Spastic_gait	Hypoplasia_of_the_corpus_callosum	Optic_disc_hypoplasia	Contractures_involving_the_joints_of_the_feet	Periventricular_white_matter_hyperdensities	High_palate	Short_stature	Periventricular_leukomalacia	Tip-toe_gait
Autosomal_recessive_spastic_paraplegia_type_55	Rare_neurologic_disease	Optic_atrophy	Optic_neuropathy	Intellectual_disability_mild	Spasticity	Hyperreflexia	Talipes_equinovarus	Lower_limb_spasticity	Hypoplasia_of_the_corpus_callosum	Spastic_paraparesis	Distal_sensory_impairment	Skeletal_muscle_atrophy	Onion_bulb_formation	Decreased_sensory_nerve_conduction_velocity	Upper_limb_muscle_weakness	Babinski_sign	Poor_fine_motor_coordination	Focal_white_matter_lesions	Lower_limb_muscle_weakness	Reduced_visual_acuity	Tibialis_muscle_weakness	Foot_dorsiflexor_weakness	Peripheral_neuropathy	Strabismus	Ophthalmoplegia	Abnormal_facial_shape	Arthrogryposis_multiplex_congenita	Cognitive_impairment
Autosomal_recessive_spastic_paraplegia_type_56	Rare_neurologic_disease	Lower_limb_hyperreflexia	Babinski_sign	Global_developmental_delay	Spastic_gait	Unsteady_gait	Toe_walking	Intellectual_disability	Spastic_paraplegia	Dystonia	Hypoplasia_of_the_corpus_callosum	Abnormal_globus_pallidus_morphology	Abnormality_of_the_cerebral_white_matter	Peripheral_axonal_neuropathy	Cognitive_impairment
Autosomal_recessive_spastic_paraplegia_type_57	Rare_neurologic_disease	Abnormality_of_peripheral_nerve_conduction	Difficulty_climbing_stairs	Difficulty_standing	Optic_atrophy	Spasticity	Spastic_paraplegia	Inability_to_walk	Babinski_sign	Abnormality_of_the_Achilles_tendon	Sensorimotor_neuropathy	Motor_polyneuropathy	Distal_lower_limb_amyotrophy	Peripheral_neuropathy	Abnormal_myelination
Autosomal_recessive_spastic_paraplegia_type_59	Rare_neurologic_disease	Spastic_paraplegia	Nystagmus	Talipes_equinovarus	Lower_limb_spasticity	Spastic_gait	Clonus	Lower_limb_hyperreflexia	Limb_hypertonia	Intellectual_disability	Abnormal_cerebellum_morphology	Abnormality_of_the_cerebral_white_matter
Autosomal_recessive_spastic_paraplegia_type_5A	Rare_neurologic_disease	Spastic_paraplegia	Lower_limb_spasticity	Impaired_vibratory_sensation	Babinski_sign	Lower_limb_muscle_weakness	Abnormality_of_the_urinary_system	Abnormal_cerebellum_morphology	Pes_cavus	Abnormality_of_the_cerebral_white_matter	Lower_limb_amyotrophy	Ankle_clonus	Limb_ataxia	Truncal_ataxia	Atrophy_of_the_spinal_cord	Sensorineural_hearing_impairment	Cataract	Nystagmus	Dysarthria	Polyneuropathy	Dysphagia	Scoliosis	Upper_limb_muscle_weakness	Upper_limb_spasticity	Upper_limb_amyotrophy
Autosomal_recessive_spastic_paraplegia_type_60	Rare_neurologic_disease	Nystagmus	Intellectual_disability_mild	Spastic_paraplegia	Lower_limb_spasticity	Spastic_gait	Impaired_vibration_sensation_in_the_lower_limbs	Difficulty_walking	Limb_hypertonia	Motor_axonal_neuropathy
Autosomal_recessive_spastic_paraplegia_type_61	Rare_neurologic_disease	Spasticity	Polyneuropathy	Difficulty_walking	Abnormality_of_the_knee	Abnormality_of_the_Achilles_tendon	Hyperactive_patellar_reflex	Motor_polyneuropathy	Scissor_gait
Autosomal_recessive_spastic_paraplegia_type_62	Rare_neurologic_disease	Lower_limb_spasticity	Dysarthria	Hyperreflexia	Difficulty_walking	Tip-toe_gait	Areflexia	Abnormal_cerebellum_morphology	Spastic_gait	Clonus	Thoracic_scoliosis	Skeletal_muscle_atrophy	Knee_flexion_contracture	Lower_limb_pain
Autosomal_recessive_spastic_paraplegia_type_63	Rare_neurologic_disease	Spasticity	Hypertonia	Hyperreflexia	Delayed_gross_motor_development	Skeletal_muscle_atrophy	Short_stature	Decreased_body_weight	Scissor_gait	Abnormality_of_the_periventricular_white_matter
Autosomal_recessive_spastic_paraplegia_type_64	Rare_neurologic_disease	Microcephaly	Aggressive_behavior	Delayed_puberty	Spasticity	Dysarthria	Gait_disturbance	Intellectual_disability_borderline	Areflexia	Abnormality_of_the_cerebral_white_matter
Autosomal_recessive_spastic_paraplegia_type_66	Rare_neurologic_disease	Intellectual_disability	Areflexia	Chronic_sensorineural_polyneuropathy	Cerebellar_hypoplasia	Talipes_equinovarus	Lower_limb_spasticity	Spastic_gait	Hypoplasia_of_the_corpus_callosum	Impaired_vibration_sensation_in_the_lower_limbs	Difficulty_walking	Limb_hypertonia	Progressive_spastic_paraplegia	Lower_limb_amyotrophy	Colpocephaly
Autosomal_recessive_spastic_paraplegia_type_67	Rare_neurologic_disease	Intellectual_disability_mild	Global_developmental_delay	Agenesis_of_corpus_callosum	Hyperreflexia	Lower_limb_spasticity	Spastic_gait	Cerebral_cortical_atrophy	Difficulty_walking	Babinski_sign	Generalized_amyotrophy	Aplasia/Hypoplasia_of_the_cerebellar_vermis	Progressive_spastic_paraplegia	Abnormal_myelination	Abnormality_of_movement	Limb_tremor
Autosomal_recessive_spastic_paraplegia_type_69	Rare_neurologic_disease	Hearing_impairment	Cataract	Intellectual_disability_mild	Global_developmental_delay	Agenesis_of_corpus_callosum	Lower_limb_spasticity	Cerebral_cortical_atrophy	Hand_tremor	Spastic_dysarthria	Aplasia/Hypoplasia_of_the_cerebellar_vermis	Progressive_spastic_paraplegia	Abnormal_myelination	Abnormality_of_movement
Autosomal_recessive_spastic_paraplegia_type_70	Rare_neurologic_disease	Intellectual_disability_mild	Global_developmental_delay	Lower_limb_spasticity	Hand_tremor	Interstitial_pulmonary_abnormality	Progressive_spastic_paraplegia	Peripheral_neuropathy	Abnormal_myelination	Abnormality_of_movement	Nephrotic_syndrome
Autosomal_recessive_spastic_paraplegia_type_71	Rare_neurologic_disease	Intellectual_disability_mild	Global_developmental_delay	Hyperreflexia	Lower_limb_spasticity	Spastic_gait	Hypoplasia_of_the_corpus_callosum	Hand_tremor	Babinski_sign	Progressive_spastic_paraplegia	Peripheral_neuropathy	Abnormal_myelination	Abnormality_of_movement	EMG_abnormality
Autosomal_recessive_spastic_paraplegia_type_74	Rare_neurologic_disease	Peripheral_axonal_neuropathy	Progressive_spastic_paraplegia	Visual_impairment	Visual_field_defect	Pes_cavus	Difficulty_walking	EMG:_neuropathic_changes	Distal_amyotrophy	Distal_peripheral_sensory_neuropathy	Hyperactive_patellar_reflex	Decreased_activity_of_mitochondrial_complex_II	Distal_lower_limb_muscle_weakness	Decreased_Achilles_reflex	Decreased_activity_of_mitochondrial_complex_I	Optic_atrophy	Babinski_sign	Cerebellar_atrophy	Hypoplasia_of_the_corpus_callosum	Cerebral_white_matter_atrophy
Autosomal_recessive_spastic_paraplegia_type_75	Rare_neurologic_disease	Intellectual_disability	Spasticity	Spastic_paraplegia	Global_developmental_delay	Dysmetria	Impaired_vibratory_sensation	Babinski_sign	Abnormal_pyramidal_sign	Distal_lower_limb_amyotrophy	Astigmatism	Hypermetropia	Nystagmus	Hyporeflexia	Generalized_hypotonia	Temporal_optic_disc_pallor	Titubation
Autosomal_recessive_spastic_paraplegia_type_76	Rare_neurologic_disease	Lower_limb_spasticity	Lower_limb_hyperreflexia	Babinski_sign	Ataxia	Dysarthria	Pes_cavus	Gait_ataxia	Skeletal_muscle_atrophy	Lower_limb_muscle_weakness	Hyperreflexia_in_upper_limbs	Peripheral_neuropathy	Functional_abnormality_of_the_bladder	Abnormality_of_eye_movement	Limb_ataxia	Scoliosis	Pes_valgus	Ankle_clonus
Autosomal_recessive_spastic_paraplegia_type_77	Rare_neurologic_disease	Progressive_spastic_paraplegia	Lower_limb_spasticity	Weakness_due_to_upper_motor_neuron_dysfunction	Lower_limb_hyperreflexia	Scissor_gait	Babinski_sign	Lower_limb_amyotrophy	Progressive_inability_to_walk	Muscle_abnormality_related_to_mitochondrial_dysfunction	Global_developmental_delay	Retrognathia	Macrodontia_of_permanent_maxillary_central_incisor	Strabismus	Ptosis	Muscular_hypotonia_of_the_trunk	Intention_tremor	Dysarthria	Poor_head_control	Seizures	Absent_speech	Impaired_mastication	Neuromuscular_dysphagia	Sudden_episodic_apnea	Kyphoscoliosis	Feeding_difficulties_in_infancy	Urinary_incontinence	Bradykinesia	Dystonia	Equinovarus_deformity	Hip_dysplasia	Myoclonus	Bilateral_cryptorchidism	Neurogenic_bladder	Detrusor_sphincter_dyssynergia	Developmental_regression	Insomnia	Paroxysmal_dystonia
Autosomal_recessive_spastic_paraplegia_type_78	Rare_neurologic_disease	Hallucinations	Progressive_extrapyramidal_movement_disorder	Skeletal_muscle_atrophy	Strabismus	Dysarthria	Cerebellar_atrophy	Hyperreflexia	Progressive_cerebellar_ataxia	Cerebral_cortical_atrophy	Difficulty_walking	Peripheral_axonal_neuropathy	EMG:_axonal_abnormality	Babinski_sign	Progressive_spastic_paraplegia	Progressive_gait_ataxia	Cognitive_impairment	Neurogenic_bladder	Supranuclear_gaze_palsy	Horizontal_nystagmus	Dystonia	Hypoplasia_of_the_corpus_callosum	Progressive_spastic_quadriplegia	Abnormality_of_the_periventricular_white_matter	Sensory_axonal_neuropathy	Abnormal_pyramidal_sign	Progressive_pes_cavus	Facial_myokymia	Dementia
Autosomal_recessive_spastic_paraplegia_type_9B	Rare_neurologic_disease	Spasticity	Lower_limb_hyperreflexia	Babinski_sign	Hyperreflexia_in_upper_limbs	Dysarthria	Motor_delay	Muscle_weakness	Growth_delay	Spastic_gait	Postural_tremor	Tetraplegia	Impaired_continence	Urinary_retention	Microcephaly	Delayed_speech_and_language_development	Global_developmental_delay	Abnormal_facial_shape	Cerebral_cortical_atrophy	Loss_of_speech	Primitive_reflex	Abnormality_of_the_periventricular_white_matter	Kyphoscoliosis	Skeletal_muscle_atrophy	Absent_Achilles_reflex	Short_stature	Impaired_vibration_sensation_at_ankles	Corpus_callosum_atrophy	Toe_walking	Pollakisuria
Autosomal_recessive_spinocerebellar_ataxia-blindness-deafness_syndrome	Rare_neurologic_disease	Hearing_impairment	Conjunctival_telangiectasia	Blindness	Nystagmus	Optic_atrophy	Sensory_neuropathy	Gait_ataxia	Progressive_cerebellar_ataxia	Impaired_vibration_sensation_in_the_lower_limbs	Head_tremor	Difficulty_walking	Spastic_dysarthria	Cochlear_degeneration	Elevated_alpha-fetoprotein	Proximal_amyotrophy	Sensorimotor_neuropathy	Spinocerebellar_atrophy	Mildly_elevated_creatine_kinase	Oculomotor_apraxia
Autosomal_spastic_paraplegia_type_30	Rare_neurologic_disease	Lower_limb_spasticity	Spastic_gait	Unsteady_gait	Lower_limb_hyperreflexia	Babinski_sign	Progressive_spastic_paraplegia	Leg_muscle_stiffness	Abnormal_saccadic_eye_movements	Ataxia	Distal_sensory_impairment	Sensory_impairment	Distal_amyotrophy	Sensorimotor_neuropathy	Scissor_gait	Diffuse_cerebellar_atrophy
Autosomal_spastic_paraplegia_type_58	Rare_neurologic_disease	Hypodontia	Dysarthria	Hyperreflexia	Gait_ataxia	Fasciculations	Lower_limb_hyperreflexia	Spastic_ataxia	Abnormality_of_the_cerebral_white_matter	Microcephaly	Horizontal_nystagmus	Spasticity	Dysmetria	Tremor	Chorea	Clonus	Frequent_falls	Babinski_sign	Distal_amyotrophy	Short_stature	Peripheral_demyelination	Erratic_myoclonus	Titubation	Intellectual_disability_mild	Global_developmental_delay	Intention_tremor	Unsteady_gait	Abnormal_pyramidal_sign	Tip-toe_gait	Torticollis	Cerebellar_atrophy	Cerebral_atrophy	Reduced_visual_acuity	Peripheral_neuropathy
Autosomal_spastic_paraplegia_type_72	Rare_neurologic_disease	Rigidity	Spastic_gait	Pes_cavus	Urinary_bladder_sphincter_dysfunction	Postural_tremor	Memory_impairment	Impaired_vibration_sensation_at_ankles	Abnormality_of_higher_mental_function	Pain
Axonal_polyneuropathy_associated_with_IgG/IgM/IgA_monoclonal_gammopathy	Rare_neurologic_disease	Motor_axonal_neuropathy	Chronic_axonal_neuropathy	Lower_limb_muscle_weakness	Sensory_axonal_neuropathy	Monoclonal_immunoglobulin_M_proteinemia	Progressive_gait_ataxia	Lower_limb_pain	Acroparesthesia	Lymphoma	Multiple_myeloma	Increased_circulating_beta-2-microglobulin_level	Cryoglobulinemia
Becker_muscular_dystrophy	Rare_neurologic_disease	Difficulty_walking	Myoglobinuria	Elevated_serum_creatine_kinase	Myalgia	Exercise_intolerance	Difficulty_climbing_stairs	Abnormal_urinary_color	Muscle_weakness	Falls	Abnormality_of_the_lower_limb	Elevated_hepatic_transaminase	Muscle_spasm	Fatigue	Pes_planus	Skeletal_muscle_atrophy	Toe_walking
Behcet_disease	Rare_neurologic_disease	Renal_insufficiency	Oral_ulcer	Retinopathy	Cataract	Photophobia	Behavioral_abnormality	Acne	Keratoconjunctivitis_sicca	Seizures	Ataxia	Hemiparesis	Hyperreflexia	Arthritis	Subcutaneous_nodule	Abnormal_myocardium_morphology	Mitral_regurgitation	Aortic_regurgitation	Pericarditis	Splenomegaly	Weight_loss	Anorexia	Migraine	Pleuritis	Hemoptysis	Pleural_effusion	Gastrointestinal_hemorrhage	Memory_impairment	Encephalitis	Increased_intracranial_pressure	Vasculitis	Arthralgia	Myalgia	Paresthesia	Venous_thrombosis	Cranial_nerve_paralysis	Abnormal_pyramidal_sign	Avascular_necrosis	Recurrent_aphthous_stomatitis	Fatigue	Increased_inflammatory_response	Immunologic_hypersensitivity	Myositis	Optic_neuritis	Retrobulbar_optic_neuritis	Gangrene	Glomerulopathy	Blindness	Irritability
Behavioral_variant_of_frontotemporal_dementia	Rare_neurologic_disease	Thickened_nuchal_skin_fold	Behavioral_abnormality	Psychosis	Hyperorality	Restlessness	Aggressive_behavior	Inappropriate_behavior	Restrictive_behavior	Stereotypy	Disinhibition	Irritability	Apathy	Personality_changes	Lack_of_insight	Mental_deterioration	Gait_disturbance	Hyperreflexia	Generalized_tonic-clonic_seizures	Abnormality_of_extrapyramidal_motor_function	Frontotemporal_dementia	Mutism	Memory_impairment	Dysphasia	Loss_of_speech	Fasciculations	Dyscalculia	Astrocytosis	Poor_speech	Upper_motor_neuron_dysfunction	Abnormality_of_the_cerebral_white_matter	Frontotemporal_cerebral_atrophy	Dyslexia	Dysgraphia	Echolalia	EEG_with_continuous_slow_activity	Collectionism	Emotional_blunting	Perseveration	Abnormal_brain_FDG_positron_emission_tomography	Abulia
Benign_adult_familial_myoclonic_epilepsy	Rare_neurologic_disease	Intellectual_disability	Myoclonus	Generalized-onset_seizure	Headache	EEG_abnormality	Hand_tremor	Focal-onset_seizure	Amaurosis_fugax
Benign_familial_infantile_epilepsy	Rare_neurologic_disease	Normal_interictal_EEG	Apnea	Focal_clonic_seizure	Focal_impaired_awareness_seizure	Generalized_tonic-clonic_seizures_with_focal_onset	Focal-onset_seizure	Generalized_tonic_seizures	Focal_motor_seizure	Focal_tonic_seizure	Generalized_clonic_seizures	Focal_seizures_afebril	Cyanosis	Hypertonia	Generalized_tonic-clonic_seizures	Absence_seizure	Limb_myoclonus	Status_epilepticus	Simple_febrile_seizures	Interictal_epileptiform_activity	Psychomotor_deterioration	Brain_imaging_abnormality
Benign_familial_neonatal_epilepsy	Rare_neurologic_disease	Focal-onset_seizure	Focal_tonic_seizure	Focal_EEG_discharges_with_secondary_generalization	Apnea	Clonus	Focal_clonic_seizure	Generalized_tonic_seizures	Focal_autonomic_seizure	Circumoral_cyanosis	Limb_myoclonus	Gastroesophageal_reflux	Muscular_hypotonia_of_the_trunk	Simple_febrile_seizures	Facial_tics	Status_epilepticus	Increased_theta_frequency_activity_in_EEG
Benign_hereditary_chorea	Rare_neurologic_disease	Gait_disturbance	Abnormality_of_movement
Benign_occipital_epilepsy	Rare_neurologic_disease	Focal_impaired_awareness_seizure	EEG_with_occipital_focal_spike_waves	Vomiting	Headache	Visual_hallucinations	Visual_gaze_preference
Benign_paroxysmal_tonic_upgaze_of_childhood_with_ataxia	Rare_neurologic_disease	Abnormality_of_eye_movement	Nystagmus	Episodic_ataxia
Benign_paroxysmal_torticollis_of_infancy	Rare_neurologic_disease	Torticollis	Abnormal_head_movements	Irritability	Apathy	Pallor	Ataxia	Vomiting	Migraine	Vertigo	Drowsiness
Benign_Samaritan_congenital_myopathy	Rare_neurologic_disease	Epicanthus	Hypertelorism	Narrow_forehead	Hyporeflexia	Generalized_hypotonia	Thickened_skin	Motor_delay	Weak_cry	Narrow_mouth	Dolichocephaly	Wide_nasal_bridge	Lethargy	Myopathic_facies	Fasciculations	Functional_respiratory_abnormality	Centrally_nucleated_skeletal_muscle_fibers	Prominent_forehead	Frog-leg_posture	Internally_nucleated_skeletal_muscle_fibers
Beta-propeller_protein-associated_neurodegeneration	Rare_neurologic_disease	Abnormality_of_eye_movement	Dementia	Frontal_release_signs	Intellectual_disability	Global_developmental_delay	Cerebellar_atrophy	Parkinsonism	Dystonia	Tremor	Cerebral_atrophy	Rigidity	Bradykinesia	Spastic_paraparesis	Sleep_disturbance	Progressive_encephalopathy	Dysautonomia	Poor_speech	Iron_accumulation_in_brain	Iron_accumulation_in_substantia_nigra	Optic_atrophy	Aggressive_behavior	Seizures
Bethlem_myopathy	Rare_neurologic_disease	Muscle_weakness	Flexion_contracture	EMG:_myopathic_abnormalities	Muscular_dystrophy	Progressive_proximal_muscle_weakness	Reduced_muscle_collagen_VI	Neck_muscle_weakness	Interphalangeal_joint_contracture_of_finger	Wrist_flexion_contracture	Gait_disturbance	Difficulty_walking	Distal_muscle_weakness	Multiple_joint_contractures	Elevated_serum_creatine_kinase	Limb-girdle_muscle_weakness	Quadriceps_muscle_weakness	Ankle_flexion_contracture	Increased_muscle_lipid_content	Camptodactyly_of_finger	Hyperkeratosis	Cigarette-paper_scars	Joint_hypermobility	Achilles_tendon_contracture	Abnormality_of_the_respiratory_system	Waddling_gait	Scoliosis	Hypoventilation	Lumbar_hyperlordosis	Elbow_flexion_contracture	Spinal_rigidity	Axial_muscle_weakness	Gowers_sign	Scapular_winging	Generalized_amyotrophy	Rimmed_vacuoles	Foot_dorsiflexor_weakness	Curved_toe_phalanx	Reduced_maximal_expiratory_pressure	Keratosis_pilaris
BICD2-related_autosomal_dominant_childhood-onset_proximal_spinal_muscular_atrophy	Rare_neurologic_disease	Difficulty_walking	Distal_muscle_weakness	Waddling_gait	Gowers_sign	Proximal_muscle_weakness	Congenital_foot_contraction_deformities	Distal_lower_limb_amyotrophy	Hyporeflexia	Motor_delay	Hyperreflexia	Flexion_contracture	Hip_dysplasia	Decreased_fetal_movement	Hyperlordosis	Abnormality_of_the_Achilles_tendon	Shoulder_girdle_muscle_weakness	Hand_muscle_weakness
Bickerstaff_brainstem_encephalitis	Rare_neurologic_disease	Ophthalmoplegia	Ataxia	Confusion	Drowsiness	EMG:_decremental_response_of_compound_muscle_action_potential_to_repetitive_nerve_stimulation	Decreased_motor_nerve_conduction_velocity	CNS_demyelination	Severe_infection	Diplopia	Areflexia	Pneumonia	Dyspnea	Abnormality_of_the_autonomic_nervous_system	EEG_abnormality	Increased_CSF_protein	Limb_muscle_weakness	Acute_demyelinating_polyneuropathy	Facial_paralysis	Abnormal_pyramidal_sign	Respiratory_tract_infection	Dysesthesia	Abnormal_thalamic_MRI_signal_intensity	Autoimmune_antibody_positivity	Abnormality_of_eye_movement	Ptosis	Nystagmus	Coma	Bulbar_palsy	Abnormal_cranial_nerve_morphology	Reduced_tendon_reflexes	Brisk_reflexes	Tetraparesis	Tetraplegia	Respiratory_failure	Babinski_sign	Respiratory_failure_requiring_assisted_ventilation	Anisocoria	Facial_palsy	Impaired_proprioception	Sensory_ataxia	Mydriasis	CSF_pleocytosis	Hypercapnia	Pain	Weakness_of_facial_musculature	Recurrent_gastroenteritis	Hypersomnia
Bilateral_striopallidodentate_calcinosis	Rare_neurologic_disease	Microcephaly	Seizures	Abnormality_of_the_liver	Intrauterine_growth_retardation	Thrombocytopenia	Subcutaneous_hemorrhage	Ventriculomegaly	Hepatomegaly	Abnormality_of_neuronal_migration	Cerebral_calcification	Corneal_opacity
Burning_mouth_syndrome	Rare_neurologic_disease	Dysesthesia	Parageusia	Impaired_temperature_sensation	Abnormal_fifth_cranial_nerve_morphology	Abnormality_of_somatosensory_evoked_potentials	Burning_mouth	Abnormality_of_taste_sensation	Anxiety	Depressivity	Tongue_pain	Abnormality_of_the_gingiva	Xerostomia	Headache	Sleep_disturbance	Emotional_lability	Strawberry_tongue	Smooth_tongue
CACH_syndrome	Rare_neurologic_disease	Dysmyelinating_leukodystrophy	Brain_imaging_abnormality	Optic_atrophy	Irritability	Seizures	Spasticity	Cerebellar_atrophy	Hyperreflexia	Cerebral_atrophy	Limb_ataxia	Truncal_ataxia	Progressive_neurologic_deterioration	Cerebellar_vermis_atrophy	Atrophy/Degeneration_affecting_the_brainstem	Premature_ovarian_insufficiency	Renal_hypoplasia	Gonadal_dysgenesis	Microcephaly	Cataract	Blindness	Behavioral_abnormality	Apathy	Primary_amenorrhea	Secondary_amenorrhea	Dysarthria	Spastic_diplegia	Hemiparesis	Motor_delay	Encephalopathy	Dysmetria	Flexion_contracture	Hepatosplenomegaly	Growth_delay	Intrauterine_growth_retardation	Decreased_fetal_movement	Oligohydramnios	Pancreatitis	Vomiting	Dysphagia	Migraine	Headache	Arthrogryposis_multiplex_congenita	Dilation_of_lateral_ventricles	Abnormality_of_the_pons	Nonketotic_hyperglycinemia	Infantile_muscular_hypotonia	Mild_global_developmental_delay	Feeding_difficulties
Canavan_disease	Rare_neurologic_disease	Macrocephaly	Hearing_impairment	Visual_impairment	Blindness	Optic_atrophy	Abnormality_of_visual_evoked_potentials	Seizures	Muscular_hypotonia	Global_developmental_delay	Hypertonia	Flexion_contracture	Gastroesophageal_reflux	EEG_abnormality	Developmental_regression	Reduced_consciousness/confusion	Abnormality_of_retinal_pigmentation	Feeding_difficulties_in_infancy	Cognitive_impairment
Cap_myopathy	Rare_neurologic_disease	High_palate	Long_face	Motor_delay	Reduced_tendon_reflexes	Abnormal_muscle_fiber_morphology	Pectus_excavatum	Generalized_hypotonia	Nasal_speech	Mitral_valve_prolapse	Pes_planus	Frequent_falls	Poor_head_control	Aortic_root_aneurysm	Lumbar_hyperlordosis	Thoracic_scoliosis	Easy_fatigability	Gowers_sign	Difficulty_climbing_stairs	Increased_variability_in_muscle_fiber_diameter	Generalized_amyotrophy	Reduced_systolic_function	Central_hypoventilation	Lower_limb_amyotrophy	Lower_limb_muscle_weakness	Pes_valgus	Difficulty_running	Facial_palsy	Sinus_tachycardia	Fatiguable_weakness_of_proximal_limb_muscles	Toe_walking
Caribbean_parkinsonism	Rare_neurologic_disease	Parkinsonism	Rigidity	Bradykinesia	Vertical_supranuclear_gaze_palsy	Hypometric_saccades	Dementia	Frontal_lobe_dementia	Hallucinations	Orthostatic_hypotension	Dystonia	Myoclonus	Ventriculomegaly	Cerebral_cortical_atrophy	Postural_instability	Apraxia	Pseudobulbar_behavioral_symptoms	Action_tremor	Sleep_disturbance	Dysautonomia	EMG:_myopathic_abnormalities	Autonomic_bladder_dysfunction	Midline_brain_calcifications	Progressive_gait_ataxia	Weakness_due_to_upper_motor_neuron_dysfunction	T2_hypointense_basal_ganglia	Palmomental_reflex	Lewy_bodies
CDKL5-deficiency_disorder	Rare_neurologic_disease	Generalized_tonic_seizures	Everted_lower_lip_vermilion	Broad_forehead	Deeply_set_eye	Inappropriate_laughter	Poor_eye_contact	Gait_disturbance	Growth_delay	Deep_philtrum	Delayed_gross_motor_development	Difficulty_walking	Poor_head_control	Bruxism	Abnormal_muscle_tone	Sleep-wake_cycle_disturbance	Impaired_pain_sensation	Focal-onset_seizure	Broad_proximal_phalanges_of_the_hand	Multifocal_epileptiform_discharges	Prominent_forehead	Moderate_global_developmental_delay	Severe_global_developmental_delay	Stereotypical_hand_wringing	Infantile_spasms	Thick_vermilion_border	Narrow_forehead	High_forehead	Synophrys	Hallux_valgus	Scoliosis	Functional_respiratory_abnormality	Kyphosis
Central_core_disease	Rare_neurologic_disease	Muscular_hypotonia	Motor_delay	Congenital_hip_dislocation	Joint_laxity	Mitral_valve_prolapse	Talipes_equinovarus	Pes_planus	Malignant_hyperthermia	Kyphoscoliosis	Multiple_joint_contractures	Myopathy	Easy_fatigability	Muscle_stiffness	Pelvic_girdle_muscle_weakness	Type_1_muscle_fiber_predominance	Central_core_regions_in_muscle_fibers	Ophthalmoplegia	Bulbar_signs	Nemaline_bodies	Abnormal_levels_of_creatine_kinase_in_blood	Fetal_akinesia_sequence	Neonatal_respiratory_distress	Respiratory_insufficiency_due_to_muscle_weakness	Elevated_serum_creatine_kinase	Rectus_femoris_muscle_atrophy
Cerebellar_ataxia_Cayman_type	Rare_neurologic_disease	Nonprogressive_cerebellar_ataxia	Nystagmus	Dysarthria	Global_developmental_delay	Generalized_hypotonia	Cerebellar_hypoplasia	Gait_ataxia	Truncal_ataxia	Intention_tremor	Broad-based_gait	Abnormal_retinal_morphology
Cerebellar_ataxia_with_neuropathy_and_bilateral_vestibular_areflexia_syndrome	Rare_neurologic_disease	Sensorineural_hearing_impairment	Optic_atrophy	Delayed_speech_and_language_development	Dysarthria	Areflexia	Dysmetria	Gait_ataxia	Progressive_cerebellar_ataxia	Dysdiadochokinesis	Intention_tremor	Distal_muscle_weakness	Multiple_joint_contractures	Babinski_sign	Demyelinating_peripheral_neuropathy	Sensorimotor_neuropathy	Vestibular_areflexia
Cerebellar_ataxia-areflexia-pes_cavus-optic_atrophy-sensorineural_hearing_loss_syndrome	Rare_neurologic_disease	Sensorineural_hearing_impairment	Optic_atrophy	Ataxia	Areflexia	Encephalopathy	Muscle_weakness	Abnormality_of_eye_movement	Autistic_behavior	Seizures	Dystonia	Pes_cavus	Dysphagia	Cognitive_impairment
Cerebellar_ataxia-hypogonadism_syndrome	Rare_neurologic_disease	Hypogonadotrophic_hypogonadism	Hypogonadism	Decreased_fertility	Brachycephaly	Abnormal_electroretinogram	Nystagmus	Optic_atrophy	Behavioral_abnormality	Dementia	Personality_changes	Gynecomastia	Abnormality_of_the_hypothalamus-pituitary_axis	Ataxia	Muscular_hypotonia	Neurological_speech_impairment	Supernumerary_nipple	Clinodactyly_of_the_5th_finger	Short_stature	Hemiplegia/hemiparesis	Abnormality_of_retinal_pigmentation
Cerebellar_hypoplasia-tapetoretinal_degeneration_syndrome	Rare_neurologic_disease	Visual_impairment	Abnormal_electroretinogram	Nystagmus	Optic_atrophy	Ataxia	Muscular_hypotonia	Cerebellar_hypoplasia	Abnormality_of_retinal_pigmentation	Cognitive_impairment
Cerebral_autosomal_dominant_arteriopathy-subcortical_infarcts-leukoencephalopathy	Rare_neurologic_disease	Leukoencephalopathy	Abnormality_of_the_cerebral_white_matter	Lacunar_stroke	Multifocal_hyperintensity_of_cerebral_white_matter_on_MRI	Apathy	Stroke	Mood_changes	Migraine	Migraine_with_aura	Transient_ischemic_attack	Cerebral_ischemia	Cognitive_impairment	Depressivity	Dementia	Anxiety	Diabetes_mellitus	Hypertension	Seizures	Spasticity	Dysarthria	Gait_disturbance	Confusion	Encephalopathy	Parkinsonism	Cerebral_hemorrhage	Dysphagia	Ischemic_stroke	Intracranial_hemorrhage	Hemiplegia	Motor_deterioration	Memory_impairment	Language_impairment	Loss_of_consciousness	Recurrent_subcortical_infarcts	Impaired_visuospatial_constructive_cognition	Stress_urinary_incontinence	Brain_atrophy	Bradyphrenia	Arterial_stenosis	Aphasia
Cerebral_autosomal_recessive_arteriopathy-subcortical_infarcts-leukoencephalopathy	Rare_neurologic_disease	Behavioral_abnormality	Spasticity	Gait_disturbance	Stroke-like_episode	Spastic_ataxia	Arteriosclerosis	Back_pain	Pseudobulbar_paralysis	Cervical_spondylosis	Lower_limb_pain	Deep_cerebral_white_matter_hyperdensities	Localized_osteoporosis	Cognitive_impairment	Emotional_lability	Aggressive_behavior	Dementia	Irritability	Apathy	Mental_deterioration	Hemiparesis	Stroke	Rigidity	Alopecia_of_scalp	Diffuse_cerebral_atrophy	Sensory_impairment	Abnormal_pyramidal_sign	Abulia	Akinetic_mutism	Neck_pain	Generalized_tonic-clonic_seizures	Kyphoscoliosis	Granular_osmiophilic_deposits_(GROD)_in_cells
Charcot-Marie-Tooth_disease_type_1A	Rare_neurologic_disease	Hyporeflexia	Gait_disturbance	Pes_cavus	Distal_muscle_weakness	Distal_sensory_impairment	Skeletal_muscle_atrophy	Decreased_motor_nerve_conduction_velocity	Decreased_sensory_nerve_conduction_velocity	Demyelinating_peripheral_neuropathy	Sensory_ataxia	Gait_imbalance	Kyphoscoliosis	Paresthesia	Acute_demyelinating_polyneuropathy	Calf_muscle_hypertrophy	Diaphragmatic_weakness	Spontaneous_pain_sensation	Shoulder_pain	Hyperactive_deep_tendon_reflexes
Charcot-Marie-Tooth_disease_type_1B	Rare_neurologic_disease	Muscle_weakness	Hearing_impairment	Abnormal_pupil_morphology	Decreased_nerve_conduction_velocity	Areflexia	Scoliosis	Increased_CSF_protein	Skeletal_muscle_atrophy	Elevated_serum_creatine_kinase	Peripheral_dysmyelination	Peripheral_axonal_neuropathy	Skeletal_muscle_hypertrophy	Motor_delay	Sensory_impairment
Charcot-Marie-Tooth_disease_type_1E	Rare_neurologic_disease	Sensorineural_hearing_impairment	Decreased_nerve_conduction_velocity	Difficulty_walking	Distal_sensory_impairment	Demyelinating_peripheral_neuropathy	Distal_lower_limb_muscle_weakness	Abnormal_pupil_morphology	Gait_disturbance	Pes_cavus	Impaired_vibration_sensation_in_the_lower_limbs	Postural_instability	Areflexia_of_lower_limbs	Hyporeflexia_of_lower_limbs	Distal_lower_limb_amyotrophy	Calf_muscle_hypoplasia	Foot_dorsiflexor_weakness	Peroneal_muscle_atrophy	Hand_muscle_atrophy	Impaired_temperature_sensation	Impaired_tactile_sensation	Abnormality_of_pain_sensation	Peroneal_muscle_weakness	Tonic_pupil	Hyporeflexia_of_upper_limbs	Slow_pupillary_light_response	Hand_muscle_weakness	Acroparesthesia	Tinnitus	Split_hand	Global_developmental_delay	Hammertoe	Gait_imbalance	Inability_to_walk	Steppage_gait	Equinovarus_deformity	Talipes_calcaneovarus	Joint_contracture_of_the_hand	Anisocoria	Profound_sensorineural_hearing_impairment	Cough
Charcot-Marie-Tooth_disease_type_1F	Rare_neurologic_disease	Decreased_nerve_conduction_velocity	Distal_muscle_weakness	Skeletal_muscle_atrophy	Sensory_impairment	Sensorimotor_neuropathy	Demyelinating_motor_neuropathy	Demyelinating_sensory_neuropathy	Abnormality_of_the_hand	Motor_delay	Areflexia	Pes_cavus	Gait_ataxia	Limb_ataxia	Unsteady_gait	Head_tremor	Hand_tremor	Positive_Romberg_sign	Impaired_vibratory_sensation	Steppage_gait	Decreased_number_of_large_peripheral_myelinated_nerve_fibers	Absent_brainstem_auditory_responses	Distal_upper_limb_amyotrophy	Mixed_demyelinating_and_axonal_polyneuropathy	Impaired_pain_sensation	Distal_lower_limb_amyotrophy	Foot_dorsiflexor_weakness	Distal_lower_limb_muscle_weakness	Hand_muscle_atrophy	Impaired_proprioception	Cervical_spinal_cord_atrophy	Hand_muscle_weakness	Urinary_incontinence	Sensorineural_hearing_impairment	Optic_nerve_hypoplasia	Muscular_hypotonia	Dysarthria	Fasciculations	Scoliosis	Muscle_spasm	Paresthesia	Scapular_winging	Proximal_lower_limb_amyotrophy	Proximal_muscle_weakness_in_lower_limbs	Proximal_muscle_weakness_in_upper_limbs	Restless_legs	Tongue_atrophy	Flexion_contracture_of_finger	Weakness_of_facial_musculature
Charcot-Marie-Tooth_disease_type_2B1	Rare_neurologic_disease	Distal_sensory_impairment	Decreased_number_of_peripheral_myelinated_nerve_fibers	Sensory_axonal_neuropathy	Axonal_loss	EMG:_axonal_abnormality	Motor_axonal_neuropathy	Decreased_amplitude_of_sensory_action_potentials	Distal_lower_limb_muscle_weakness	Axonal_degeneration	Areflexia	Abnormality_of_the_foot	Pes_cavus	Hammertoe	Distal_muscle_weakness	Steppage_gait	Decreased_number_of_large_peripheral_myelinated_nerve_fibers	Distal_amyotrophy	Proximal_muscle_weakness	Distal_upper_limb_amyotrophy	Proximal_lower_limb_amyotrophy	Distal_upper_limb_muscle_weakness	Proximal_muscle_weakness_in_lower_limbs	Peroneal_muscle_atrophy	Hand_muscle_atrophy	Toe_extensor_amyotrophy	Hand_muscle_weakness	Inability_to_walk	Shoulder_girdle_muscle_atrophy	Proximal_amyotrophy	Decreased_number_of_small_peripheral_myelinated_nerve_fibers	Pelvic_girdle_muscle_atrophy	Decreased_motor_nerve_conduction_velocity	Clusters_of_axonal_regeneration
Charcot-Marie-Tooth_disease_type_4A	Rare_neurologic_disease	Decreased_nerve_conduction_velocity	Abnormality_of_the_foot	Pes_cavus	Distal_muscle_weakness	Distal_sensory_impairment	EMG_abnormality	Distal_amyotrophy	Poor_fine_motor_coordination	Poor_gross_motor_coordination	Motor_delay	Areflexia	Vocal_cord_paresis	Hoarse_voice	Hammertoe	Bilateral_talipes_equinovarus	Unsteady_gait	Inability_to_walk	Decreased_number_of_large_peripheral_myelinated_nerve_fibers	Limited_interphalangeal_movement	Limited_wrist_movement	Impaired_distal_proprioception	Impaired_distal_vibration_sensation	Impaired_distal_tactile_sensation	Chronic_axonal_neuropathy	Impaired_pain_sensation	Decreased_Achilles_reflex	Joint_contracture_of_the_hand	Hyporeflexia_of_upper_limbs	Hand_muscle_weakness	Restrictive_ventilatory_defect	Frequent_falls	Scoliosis	Shoulder_girdle_muscle_weakness	Quadriceps_muscle_weakness	Demyelinating_peripheral_neuropathy	Spinal_deformities	Generalized_neonatal_hypotonia	Denervation_of_the_diaphragm	Motor_conduction_block	Weakness_of_facial_musculature
Charcot-Marie-Tooth_disease_type_4B2	Rare_neurologic_disease	Abnormality_of_the_foot	Difficulty_walking	Areflexia_of_lower_limbs	Myelin_outfoldings	Poor_fine_motor_coordination	Decreased_distal_sensory_nerve_action_potential	Lower_limb_muscle_weakness	Distal_upper_limb_muscle_weakness	Distal_lower_limb_muscle_weakness	Glaucoma	Vocal_cord_paralysis	Dysphonia	Pes_cavus	Scoliosis	Kyphoscoliosis	Distal_sensory_impairment	Proximal_muscle_weakness_in_lower_limbs	Areflexia_of_upper_limbs	Difficulty_in_tongue_movements	Sensorineural_hearing_impairment	Ptosis	Cataract	Buphthalmos	Optic_atrophy	Autistic_behavior	Penetrating_foot_ulcers	Developmental_glaucoma	Motor_delay	Specific_learning_disability	Tremor	Pes_planus	Respiratory_insufficiency	Inability_to_walk	Reduced_vital_capacity	Paresthesia	Proximal_muscle_weakness_in_upper_limbs	Tongue_atrophy	Hand_muscle_weakness	Weakness_of_facial_musculature	Toe_walking
Charcot-Marie-Tooth_disease_type_4C	Rare_neurologic_disease	Abnormality_of_the_foot	Difficulty_walking	Decreased_number_of_peripheral_myelinated_nerve_fibers	Decreased_motor_nerve_conduction_velocity	EMG:_chronic_denervation_signs	Functional_motor_deficit	Demyelinating_peripheral_neuropathy	Sensorimotor_neuropathy	Areflexia	Tongue_fasciculations	Pes_cavus	Hammertoe	Gait_ataxia	Frequent_falls	Distal_muscle_weakness	Scoliosis	Myalgia	Muscle_spasm	Distal_amyotrophy	Impaired_distal_vibration_sensation	Spinal_deformities	Foot_dorsiflexor_weakness	Difficulty_in_tongue_movements	Sensorineural_hearing_impairment	Abnormality_of_the_optic_nerve	Nystagmus	Dysarthria	Cerebellar_atrophy	Hip_dysplasia	Failure_to_thrive	Vocal_cord_paresis	Pes_planus	Respiratory_insufficiency	Drooling	Head_tremor	Positive_Romberg_sign	Inability_to_walk	Hypoventilation	Facial_paralysis	Impaired_pain_sensation	Abnormal_pupillary_light_reflex	Anisocoria	Sensory_ataxia	Tongue_atrophy	Weakness_of_facial_musculature	Optic_atrophy	Peripheral_visual_field_loss	Pes_valgus
Charcot-Marie-Tooth_disease_type_4D	Rare_neurologic_disease	Decreased_motor_nerve_conduction_velocity	Decreased_amplitude_of_sensory_action_potentials	Demyelinating_peripheral_neuropathy	Distal_lower_limb_muscle_weakness	Sensorineural_hearing_impairment	Motor_delay	Abnormality_of_the_foot	Unsteady_gait	Distal_muscle_weakness	Lower_limb_amyotrophy	Split_hand	Pes_cavus	Hammertoe	Postural_tremor	Inability_to_walk	Kyphoscoliosis	Distal_sensory_impairment	Sensory_impairment	Proximal_muscle_weakness	Distal_upper_limb_muscle_weakness	Upper_limb_amyotrophy	Skewfoot
Charcot-Marie-Tooth_disease_type_4G	Rare_neurologic_disease	Areflexia	Abnormality_of_the_foot	Impaired_vibratory_sensation	Distal_sensory_impairment	Decreased_motor_nerve_conduction_velocity	Peripheral_axonal_neuropathy	Distal_sensory_loss_of_all_modalities	Demyelinating_peripheral_neuropathy	Decreased_distal_sensory_nerve_action_potential	Distal_lower_limb_muscle_weakness	Peripheral_demyelination	Motor_conduction_block	Abnormality_of_the_hand	Pes_cavus	Talipes_equinovarus	Difficulty_walking	Distal_amyotrophy	Proximal_muscle_weakness	Lower_limb_amyotrophy	Distal_upper_limb_muscle_weakness	Upper_limb_amyotrophy	Impaired_tactile_sensation	Gait_imbalance	Progressive_inability_to_walk	Scoliosis	Impaired_pain_sensation	Pes_valgus
Charcot-Marie-Tooth_disease-deafness-intellectual_disability_syndrome	Rare_neurologic_disease	Decreased_nerve_conduction_velocity	Intellectual_disability_mild	Decreased_number_of_large_peripheral_myelinated_nerve_fibers	Decreased_amplitude_of_sensory_action_potentials	Sensorimotor_neuropathy	Lower_limb_amyotrophy	Severe_sensorineural_hearing_impairment	Dysarthria	Global_developmental_delay	Absent_speech	Failure_to_thrive_in_infancy	Pes_cavus	Gait_ataxia	Areflexia_of_lower_limbs	Abnormality_of_peripheral_nerve_conduction	Distal_sensory_impairment_of_all_modalities	Absent_Achilles_reflex	Impaired_vibration_sensation_at_ankles	Distal_lower_limb_amyotrophy	Intrinsic_hand_muscle_atrophy	Distal_upper_limb_muscle_weakness	Calf_muscle_hypoplasia	Foot_dorsiflexor_weakness	Amyotrophy_of_ankle_musculature	Distal_lower_limb_muscle_weakness	Upper_limb_amyotrophy	Respiratory_insufficiency	Areflexia_of_upper_limbs	Pain	Axonal_degeneration
Childhood_absence_epilepsy	Rare_neurologic_disease	EEG_with_spike-wave_complexes_(2.5-3.5_Hz)	Typical_absence_seizure	Pallor	Attention_deficit_hyperactivity_disorder	Depressivity	Anxiety	Intellectual_disability	Specific_learning_disability	Generalized_tonic-clonic_seizures	Febrile_seizures	Hyperventilation	Uncontrolled_eye_movements	Dyslexia	Impaired_visuospatial_constructive_cognition	Myoclonic_absence	Abnormal_social_behavior	Punding	Low_self_esteem	Urinary_incontinence	Jerky_head_movements	Limb_myoclonus
Childhood_apraxia_of_speech	Rare_neurologic_disease	Delayed_speech_and_language_development	Neurological_speech_impairment	Dysarthria	Specific_learning_disability	Poor_speech	Expressive_language_delay	Incomprehensible_speech	Grammar-specific_speech_disorder	Poor_fine_motor_coordination	Receptive_language_delay	Speech_apraxia	Abnormal_speech_prosody	Drooling	Abnormal_caudate_nucleus_morphology	Caudate_atrophy	Poor_gross_motor_coordination	Feeding_difficulties	Delayed_social_development	Submucous_cleft_hard_palate	Overfolded_helix	Autistic_behavior	High_narrow_palate	Horizontal_eyebrow
Childhood_disintegrative_disorder	Rare_neurologic_disease	Motor_deterioration	Developmental_regression	Intellectual_disability_severe	Seizures	Autistic_behavior	Mental_deterioration	Progressive_language_deterioration	Abnormal_emotion/affect_behavior	Urinary_incontinence	Stereotypy	Impaired_social_interactions	Anxiety	Absent_speech	Bowel_incontinence	Social_and_occupational_deterioration	Dementia
Childhood-onset_autosomal_recessive_slowly_progressive_spinocerebellar_ataxia	Rare_neurologic_disease	Progressive_cerebellar_ataxia	Dysmetric_saccades	Diplopia	Oculomotor_apraxia	Horizontal_nystagmus	Saccadic_smooth_pursuit	Dysarthria	Cerebellar_atrophy	Dysmetria	Hyperreflexia	Limb_ataxia	Broad-based_gait	Scanning_speech	Clumsiness	Difficulty_walking	Impaired_vibratory_sensation	Babinski_sign	Progressive_gait_ataxia	Postural_tremor	EMG:_neuropathic_changes	Seizures
Childhood-onset_benign_chorea_with_striatal_involvement	Rare_neurologic_disease	Chorea	Abnormal_corpus_striatum_morphology	Striatal_T2_hyperintensity	Anxiety	Parkinsonism_with_favorable_response_to_dopaminergic_medication	Dementia	Delayed_gross_motor_development
Childhood-onset_motor_and_cognitive_regression_syndrome_with_extrapyramidal_movement_disorder	Rare_neurologic_disease	Behavioral_abnormality	Dysarthria	Dysphagia	Cerebral_atrophy	Abnormality_of_extrapyramidal_motor_function	Developmental_regression	Abnormal_pyramidal_sign	Hyperintensity_of_cerebral_white_matter_on_MRI	Microcephaly	Seizures	Spasticity	Global_developmental_delay	Dystonia	Absent_speech	Gait_ataxia	Intellectual_disability_profound	EEG_abnormality	Dysphasia	Inability_to_walk	Intellectual_disability_severe	Aggressive_behavior	Autistic_behavior	Hyperactivity	Pectus_carinatum	Chorea	Hypoplasia_of_the_corpus_callosum	Ventriculomegaly	Limb_hypertonia	Kyphosis	Impaired_pain_sensation	Infantile_muscular_hypotonia	Gastrostomy_tube_feeding_in_infancy	Impulsivity
Childhood-onset_nemaline_myopathy	Rare_neurologic_disease	Areflexia	Generalized_hypotonia	Facial_diplegia	Flexion_contracture	Slender_build	Breech_presentation	Cardiomyopathy	Pes_cavus	Fetal_akinesia_sequence	Bulbar_signs	Waddling_gait	Scoliosis	Respiratory_insufficiency_due_to_muscle_weakness	Reduced_vital_capacity	Scapular_winging	Mildly_elevated_creatine_kinase	Feeding_difficulties	Fatigable_weakness_of_bulbar_muscles	Ptosis	Polyhydramnios	Arthrogryposis_multiplex_congenita	Poor_fine_motor_coordination	Myopathy	EMG:_myopathic_abnormalities	Nemaline_bodies	Hyporeflexia	Motor_delay	Bradykinesia	Neuromuscular_dysphagia	Clumsiness	Difficulty_walking	Spinal_rigidity	Exercise_intolerance	Muscle_stiffness	Increased_variability_in_muscle_fiber_diameter	Limb_muscle_weakness	Type_1_muscle_fiber_predominance	Generalized_limb_muscle_atrophy	Increased_muscle_lipid_content	High_palate	Narrow_face	Long_face	Hypertelorism	Micrognathia	Neck_muscle_weakness	Narrow_chest
Choreoacanthocytosis	Rare_neurologic_disease	Chorea	Involuntary_movements	Behavioral_abnormality	Seizures	Parkinsonism	Reduced_tendon_reflexes	Acanthocytosis	Poor_motor_coordination	Caudate_atrophy	Limb_dystonia	Distal_muscle_weakness	Impaired_vibratory_sensation	Falls	Myopathy	Elevated_serum_creatine_kinase	Absent_Achilles_reflex	EMG:_neuropathic_changes	Peripheral_axonal_neuropathy	Distal_amyotrophy	Dilation_of_lateral_ventricles	Decreased_amplitude_of_sensory_action_potentials	Laryngeal_dystonia	Square-wave_jerks	Abnormal_erythrocyte_enzyme_activity	Motor_tics	Phonic_tics	Muscle_fiber_atrophy	Abnormality_of_eye_movement	Slow_saccadic_eye_movements	Blepharospasm	Emotional_lability	Depressivity	Aggressive_behavior	Obsessive-compulsive_behavior	Short_attention_span	Irritability	Anxiety	Apathy	Hyperactivity	Dysarthria	Mental_deterioration	Hypertonia	Slurred_speech	Arthritis	Splenomegaly	Weight_loss	Dysphagia	Bradykinesia
Chronic_bilirubin_encephalopathy	Rare_neurologic_disease	Hepatic_encephalopathy	Neonatal_hyperbilirubinemia	Prolonged_neonatal_jaundice	Abnormal_auditory_evoked_potentials	Sensorineural_hearing_impairment	Abnormal_conjunctiva_morphology	Intellectual_disability	Seizures	Hypertonia	Kernicterus	Hemolytic_anemia	Fever	Central_apnea	Hypoalbuminemia	Feeding_difficulties	Abnormal_thalamic_MRI_signal_intensity	Conjunctival_icterus	Cerebral_palsy	Hypernatremia	Visual_gaze_preference	Neonatal_sepsis
Chronic_hiccup	Rare_neurologic_disease	Recurrent_singultus	Depressivity	Abnormality_of_the_diaphragm	Weight_loss	Dehydration	Sleep_disturbance	Malnutrition	Abnormal_eating_behavior
Chronic_inflammatory_demyelinating_polyneuropathy	Rare_neurologic_disease	Decreased_nerve_conduction_velocity	Areflexia	Unsteady_gait	Paresthesia	Sensory_impairment	Segmental_peripheral_demyelination/remyelination	Peripheral_neuropathy	Sensory_ataxia	Peripheral_demyelination	Motor_conduction_block	Fatiguable_weakness_of_proximal_limb_muscles	Abnormal_nerve_conduction_velocity	Difficulty_walking	Falls	Difficulty_climbing_stairs	Hand_muscle_weakness	Spontaneous_pain_sensation
Classic_glucose_transporter_type_1_deficiency_syndrome	Rare_neurologic_disease	Progressive_microcephaly	Seizures	Ataxia	Spasticity	Global_developmental_delay	Encephalopathy	Dystonia	Abnormal_erythrocyte_morphology	Status_epilepticus	EEG_abnormality	Hypoglycorrhachia	Delayed_speech_and_language_development	Cyanosis	Intellectual_disability	Lethargy	Dysarthria	Choreoathetosis	Hemiparesis	Hypertonia	Confusion	Chorea	Headache	Paralysis	Muscle_stiffness	Generalized_hyperreflexia	Extrapyramidal_dyskinesia	Paroxysmal_involuntary_eye_movements	Dyskinesia	Strabismus	Myoclonus	Apraxia	Sleep_disturbance	Central_apnea
Classic_multiminicore_myopathy	Rare_neurologic_disease	Congenital_muscular_dystrophy	High_palate	Generalized_hypotonia	Failure_to_thrive	High_pitched_voice	Restrictive_deficit_on_pulmonary_function_testing	Delayed_gross_motor_development	Poor_head_control	Scoliosis	Multiple_joint_contractures	Nocturnal_hypoventilation	Spinal_rigidity	Axial_muscle_weakness	Generalized_amyotrophy	Short_stature	Intermittent_episodes_of_respiratory_insufficiency_due_to_muscle_weakness	Limited_neck_flexion	Increased_muscle_lipid_content	Weakness_of_facial_musculature	Muscle_fiber_atrophy	Mandibular_prognathia	Microretrognathia	Hip_dysplasia	Mitral_valve_prolapse	Congestive_heart_failure	Right_ventricular_hypertrophy	Right_ventricular_failure	Pes_planus	Absent_muscle_fiber_merosin
Classic_pantothenate_kinase-associated_neurodegeneration	Rare_neurologic_disease	Gait_disturbance	Abnormality_of_the_tongue	Rod-cone_dystrophy	Optic_disc_pallor	Pigmentary_retinal_degeneration	Spasticity	Dysarthria	Hyperreflexia	Dysphagia	Frequent_falls	Eye_of_the_tiger_anomaly_of_globus_pallidus	Abnormal_posturing	Inability_to_walk	Increased_susceptibility_to_fractures	Muscle_stiffness	Attention_deficit_hyperactivity_disorder	Generalized_dystonia	Iron_accumulation_in_brain	Toe_walking	Cognitive_impairment	Mask-like_facies	Global_developmental_delay	Weight_loss	Opisthotonus	Aspiration_pneumonia	Cough	Blindness	Seizures
Classic_progressive_supranuclear_palsy_syndrome	Rare_neurologic_disease	Postural_instability	Falls	Slow_saccadic_eye_movements	Mental_deterioration	Conjunctival_hyperemia	Decreased_lacrimation	Blurred_vision	Blepharospasm	Photophobia	Social_and_occupational_deterioration	Impulsivity	Slowed_slurred_speech	Supranuclear_gaze_palsy	Neuromuscular_dysphagia	Parkinsonism	Axial_muscle_stiffness	Bradykinesia	Gait_imbalance	Vertical_supranuclear_gaze_palsy	Axial_dystonia	Akinesia	Tremor	Dysarthria	Progressive_extrapyramidal_muscular_rigidity	Dystonia	Abnormal_saccadic_eye_movements	Abnormal_pyramidal_sign	Parkinsonism_with_favorable_response_to_dopaminergic_medication
CLCN4-related_X-linked_intellectual_disability_syndrome	Rare_neurologic_disease	Global_developmental_delay	Behavioral_abnormality	Seizures	Cerebral_cortical_atrophy	Intellectual_disability_moderate	Abnormality_of_the_cerebral_white_matter	Intellectual_disability_severe	Microcephaly	Macrocephaly	Strabismus	Depressivity	Aggressive_behavior	Obsessive-compulsive_behavior	Autistic_behavior	Anxiety	Hyperactivity	Myoclonus	Gastroesophageal_reflux	Lower_limb_spasticity	Generalized_tonic-clonic_seizures	Progressive_cerebellar_ataxia	Hypoplasia_of_the_corpus_callosum	Ventriculomegaly	Absence_seizure	Focal_impaired_awareness_seizure	Scoliosis	Periventricular_leukomalacia	Bipolar_affective_disorder	Infantile_muscular_hypotonia	Focal_tonic_seizure	EEG_with_focal_spikes	Feeding_difficulties	Delayed_myelination	Infantile_spasms	Cerebral_visual_impairment	Self-injurious_behavior	Inguinal_hernia	Cryptorchidism	Long_face	Pointed_chin	Pes_planus	Chorea	Unsteady_gait	Upper_limb_spasticity	Midface_retrusion
CLN5_disease	Rare_neurologic_disease	Visual_impairment	Abnormality_of_visual_evoked_potentials	Behavioral_abnormality	Seizures	Inability_to_walk	Focal-onset_seizure	Atrophy/Degeneration_affecting_the_central_nervous_system	Corpus_callosum_atrophy	Nystagmus	Aggressive_behavior	Hyperactivity	Ataxia	Spasticity	Mental_deterioration	Cerebellar_atrophy	Dysmetria	Hyperreflexia	Dysdiadochokinesis	Truncal_ataxia	Cerebral_cortical_atrophy	Postural_instability	Generalized-onset_seizure	Clumsiness	Unsteady_gait	Sleep_disturbance	Language_impairment	Poor_gross_motor_coordination	Multifocal_epileptiform_discharges	EEG_with_generalized_slow_activity	EEG_with_spike-wave_complexes	Focal_myoclonic_seizures	EEG_with_focal_spikes	Abnormality_of_central_motor_function	Periventricular_white_matter_hyperdensities	Autistic_behavior	Hallucinations	Anxiety	Tremor	Obsessive-compulsive_trait
CNTNAP2-related_developmental_and_epileptic_encephalopathy	Rare_neurologic_disease	Delayed_speech_and_language_development	Seizures	Abnormality_of_neuronal_migration	Focal-onset_seizure	Abnormal_neuron_morphology	Delayed_ability_to_walk	Global_developmental_delay	Mental_deterioration	Motor_delay	Poor_speech	Progressive_language_deterioration	Generalized_tonic-clonic_seizures_with_focal_onset	EEG_with_generalized_slow_activity	Intellectual_disability_severe	Interictal_epileptiform_activity	EEG_with_generalized_epileptiform_discharges	EEG_with_generalized_polyspikes	Hypertelorism	Downslanted_palpebral_fissures	Nystagmus	Behavioral_abnormality	Autism	Aggressive_behavior	Self-mutilation	Low_frustration_tolerance	Hyperactivity	Poor_eye_contact	Precocious_puberty	Ataxia	Muscular_hypotonia	Hyporeflexia	Areflexia	Absent_speech	Obesity	Pes_cavus	Lower_limb_spasticity	Hepatomegaly	Intellectual_disability_moderate	Intermittent_hyperventilation	Cerebellar_vermis_atrophy	Periventricular_leukomalacia	Receptive_language_delay	EEG_with_focal_spikes	Feeding_difficulties	Skin-picking	Stereotypical_hand_wringing	Abnormal_temper_tantrums	Cerebral_palsy
COASY_protein-associated_neurodegeneration	Rare_neurologic_disease	Obsessive-compulsive_behavior	Dysarthria	Parkinsonism	Spastic_paraparesis	Abnormal_caudate_nucleus_morphology	Difficulty_walking	Abnormal_globus_pallidus_morphology	Eye_of_the_tiger_anomaly_of_globus_pallidus	Peripheral_axonal_neuropathy	Abnormality_of_thalamus_morphology	Abnormal_corpus_striatum_morphology	Oromandibular_dystonia	Cognitive_impairment
Cobblestone_lissencephaly_without_muscular_or_ocular_involvement	Rare_neurologic_disease	Hydrocephalus	Optic_atrophy	Cerebellar_hypoplasia	Occipital_encephalocele	Gray_matter_heterotopia	Hypoplasia_of_the_brainstem	Abnormality_of_the_cerebral_white_matter	Type_II_lissencephaly	Severe_global_developmental_delay	Abnormal_myelination	Dysgyria	Seizures	EMG_abnormality
Combined_oxidative_phosphorylation_defect_type_39	Rare_neurologic_disease	Optic_disc_pallor	Delayed_speech_and_language_development	Poor_eye_contact	Abnormal_corpus_callosum_morphology	Abnormal_cerebellum_morphology	Cerebellar_hypoplasia	Absent_speech	Bradycardia	Poor_head_control	Increased_CSF_lactate	Abnormality_of_the_cerebral_white_matter	Loss_of_ability_to_walk	Deep_white_matter_hypodensities	No_social_interaction	Feeding_difficulties_in_infancy	Infantile_axial_hypotonia	Severe_global_developmental_delay	Abnormal_enzyme/coenzyme_activity	Hyperintensity_of_cerebral_white_matter_on_MRI	Cryptorchidism	Open_mouth	Microcephaly	Decreased_nerve_conduction_velocity	Seizures	Dysarthria	Muscle_weakness	Hyperreflexia	Intrauterine_growth_retardation	Neonatal_hypoglycemia	Vomiting	Myopathic_facies	Cerebral_atrophy	Lower_limb_spasticity	Hypoplasia_of_the_corpus_callosum	Increased_serum_lactate	Drooling	EEG_abnormality	Limb_hypertonia	Hypsarrhythmia	Scoliosis	Muscle_spasm	Babinski_sign	Involuntary_movements	Congenital_foot_contractures	Dilation_of_lateral_ventricles	Atrophy/Degeneration_affecting_the_brainstem	Corpus_callosum_atrophy	Ankle_clonus
Complex_regional_pain_syndrome	Rare_neurologic_disease	Limb_pain	Dry_skin	Sensory_impairment	Involuntary_movements	Slow-growing_nails	Pedal_edema	Edema_of_the_upper_limbs	Erythema	Trophic_changes_related_to_pain	Allodynia	Hyperalgesia	Abnormality_of_hair_growth
Congenital_cataract-progressive_muscular_hypotonia-hearing_loss-developmental_delay_syndrome	Rare_neurologic_disease	Progressive_sensorineural_hearing_impairment	Ptosis	Developmental_cataract	Muscular_hypotonia	Global_developmental_delay	Reduced_tendon_reflexes	Rotary_nystagmus	Hypoplasia_of_the_corpus_callosum	Lactic_acidosis	Infantile_axial_hypotonia	Decreased_serum_ferritin	Abnormal_muscle_fiber_protein_expression	Muscle_weakness
Congenital_cerebellar_ataxia_due_to_RNU12_mutation	Rare_neurologic_disease	Dysarthria	Cerebellar_atrophy	Gait_ataxia	Intention_tremor	Broad-based_gait	Delayed_gross_motor_development	Difficulty_walking	Frequent_falls	Febrile_seizures	Cerebellar_vermis_atrophy	Poor_fine_motor_coordination	Infantile_axial_hypotonia	Neurodevelopmental_abnormality	Nystagmus	Decreased_liver_function	Abnormal_corpus_callosum_morphology	Cerebral_cortical_atrophy
Congenital_fiber-type_disproportion_myopathy	Rare_neurologic_disease	Muscular_hypotonia	Progressive_muscle_weakness	Type_1_muscle_fiber_atrophy	High_palate	Dental_crowding	Motor_delay	Areflexia	Reduced_tendon_reflexes	Flexion_contracture	Failure_to_thrive	Weight_loss	Dysphagia	Myopathic_facies	Abnormality_of_the_respiratory_system	Poor_head_control	Respiratory_insufficiency_due_to_muscle_weakness	Easy_fatigability	Weakness_of_muscles_of_respiration	Poor_appetite	Abnormality_of_skeletal_morphology	Feeding_difficulties	Fatigue	Fatigable_weakness_of_bulbar_muscles	Weakness_of_facial_musculature	Long_face	Micrognathia	Ophthalmoplegia	Pectus_excavatum	Congenital_hip_dislocation	Decreased_fetal_movement	Polyhydramnios	Hoarse_voice	Abnormal_heart_morphology	Cor_pulmonale	Pes_cavus	Talipes_equinovarus	Recurrent_respiratory_infections	Headache	Sleep_disturbance	Scoliosis	Kyphoscoliosis	Respiratory_failure	Elbow_flexion_contracture	Hip_contracture	Hyperlordosis	Generalized_muscle_weakness	Shoulder_girdle_muscle_weakness	Pelvic_girdle_muscle_weakness
Congenital_insensitivity_to_pain_with_severe_intellectual_disability	Rare_neurologic_disease	Strabismus	Keratitis	Self-mutilation	Specific_learning_disability	Delayed_CNS_myelination	Osteomyelitis	Recurrent_fractures	Pain_insensitivity	Decreased_corneal_reflex	Impaired_tactile_sensation	Severe_global_developmental_delay	Facial_asymmetry	Micrognathia	Prominent_nose	Small_for_gestational_age	Oligohydramnios	Talipes_equinovalgus	Rocker_bottom_foot	Abnormal_facial_shape	Generalized_tonic-clonic_seizures	Tibial_bowing	Congenital_bilateral_hip_dislocation	Infantile_muscular_hypotonia	Limb_undergrowth	Multifocal_epileptiform_discharges	Nasogastric_tube_feeding_in_infancy	Seesaw_nystagmus	Short_palpebral_fissure	Corneal_erosion
Congenital_intrauterine_infection-like_syndrome	Rare_neurologic_disease	Microcephaly	Seizures	Spasticity	Hyperreflexia	Cerebral_cortical_atrophy	Cerebral_calcification	Abnormality_of_movement
Congenital_multicore_myopathy_with_external_ophthalmoplegia	Rare_neurologic_disease	External_ophthalmoplegia	Motor_delay	Generalized_hypotonia	Muscle_weakness	Decreased_fetal_movement	Myopathic_facies	Functional_respiratory_abnormality	Axial_muscle_weakness	Increased_variability_in_muscle_fiber_diameter	Muscular_dystrophy	Proximal_muscle_weakness	Type_1_muscle_fiber_predominance	Increased_connective_tissue	Facial_palsy	Abnormal_skeletal_muscle_morphology	Type_1_muscle_fiber_atrophy	Feeding_difficulties	Internally_nucleated_skeletal_muscle_fibers	Muscle_fiber_hypertrophy	Cryptorchidism	Scrotal_hypoplasia	Micropenis	High_palate	Narrow_face	Ptosis	Edema	Facial_diplegia	Flexion_contracture	Joint_laxity	Polyhydramnios	Pneumonia	Recurrent_respiratory_infections	Scoliosis	Respiratory_failure	Skeletal_muscle_atrophy	Shoulder_girdle_muscle_weakness	Nemaline_bodies	Severe_postnatal_growth_retardation	Difficulty_running	Tented_upper_lip_vermilion	Tibialis_atrophy	Sternocleidomastoid_amyotrophy	Frog-leg_posture	Rectus_femoris_muscle_atrophy
Congenital_muscular_dystrophy_due_to_LMNA_mutation	Rare_neurologic_disease	Narrow_chest	Muscular_hypotonia	Global_developmental_delay	Gait_disturbance	Flexion_contracture	Limitation_of_joint_mobility	Death_in_infancy	Decreased_fetal_movement	Congestive_heart_failure	Talipes	Respiratory_insufficiency	Poor_head_control	Myopathy	Skeletal_muscle_atrophy	Spinal_rigidity	Hyperlordosis	Axial_muscle_weakness	EMG_abnormality	Cachexia	Joint_hyperflexibility	Arrhythmia	Feeding_difficulties
Congenital_muscular_dystrophy_with_cerebellar_involvement	Rare_neurologic_disease	Skeletal_muscle_hypertrophy	Diffuse_white_matter_abnormalities	Abnormal_pyramidal_sign	Type_II_lissencephaly	White_matter_neuronal_heterotopia	Abnormality_of_brain_morphology	Megalocornea	Strabismus	Cataract	Abnormality_iris_morphology	Myopia	Coloboma	Optic_nerve_hypoplasia	Optic_atrophy	Seizures	Intellectual_disability_mild	Agenesis_of_corpus_callosum	Hyperreflexia	Occipital_encephalocele	Ventriculomegaly	Polymicrogyria	Clonus	Cerebellar_cyst	Fusion_of_the_cerebellar_hemispheres	Olivopontocerebellar_hypoplasia	Hypoplasia_of_the_pons	Decreased_thalamic_volume	Retinal_detachment	Microphthalmia	Blindness	Cardiomyopathy	Elevated_serum_creatine_kinase	Congenital_muscular_dystrophy	Hypoglycosylation_of_alpha-dystroglycan	Reduced_muscle_fiber_alpha_dystroglycan	Macroglossia	Hydrocephalus	Microcephaly	Global_developmental_delay	Abnormal_cerebellum_morphology	Cerebellar_hypoplasia	Dilated_fourth_ventricle	Abnormality_of_brainstem_morphology	Hypoplasia_of_the_brainstem	Lumbar_hyperlordosis	Proximal_muscle_weakness	Calf_muscle_pseudohypertrophy
Congenital_muscular_dystrophy_with_intellectual_disability	Rare_neurologic_disease	Intellectual_disability	Elevated_serum_creatine_kinase	Infantile_muscular_hypotonia	Hypoglycosylation_of_alpha-dystroglycan	Reduced_muscle_fiber_alpha_dystroglycan	Microcephaly	Global_developmental_delay	Motor_delay	Cerebral_cortical_atrophy	Multiple_joint_contractures	Limb-girdle_muscle_weakness	Poor_gross_motor_coordination	Calf_muscle_hypertrophy	Feeding_difficulties	Fatigable_weakness_of_skeletal_muscles	Cryptorchidism	Micropenis	Abnormality_of_the_eye	Strabismus	Myopia	Pigmentary_retinopathy	Abnormality_of_the_nervous_system	Reduced_tendon_reflexes	Cerebellar_vermis_hypoplasia	Cerebellar_hypoplasia	Hypoplasia_of_the_corpus_callosum	Respiratory_insufficiency	Ventriculomegaly	Poor_speech	Abnormality_of_the_periventricular_white_matter	Scoliosis	Hip_dislocation	Respiratory_failure	Axial_muscle_weakness	Abnormality_of_connective_tissue	Skeletal_muscle_hypertrophy	Decreased_cervical_spine_mobility	Loss_of_ability_to_walk	Abnormality_of_the_pons	Spinal_deformities	Facial_palsy	Intellectual_disability_severe	Abnormality_of_the_tongue_muscle
Congenital_muscular_dystrophy_without_intellectual_disability	Rare_neurologic_disease	Congenital_muscular_dystrophy	Motor_delay	Cerebellar_atrophy	Generalized_hypotonia	Neonatal_hypotonia	Facial_diplegia	Achilles_tendon_contracture	Difficulty_walking	Frequent_falls	Abnormality_of_the_cerebral_white_matter	Generalized_muscle_weakness	Myalgia	Muscle_spasm	EMG:_myopathic_abnormalities	Limb-girdle_muscle_atrophy	Proximal_amyotrophy	Mildly_elevated_creatine_kinase	Fatty_replacement_of_skeletal_muscle	Reduced_muscle_fiber_alpha_dystroglycan	Toe_walking	Microcephaly	Cerebellar_cyst	Kyphoscoliosis	Pachygyria	Ventriculomegaly	Gray_matter_heterotopia	Intellectual_disability
Congenital_muscular_dystrophy-infantile_cataract-hypogonadism_syndrome	Rare_neurologic_disease	Hypogonadism	Abnormality_of_the_ovary	Mask-like_facies	Strabismus	Ptosis	Cataract	Muscular_hypotonia	Gait_disturbance	Kyphosis	Cubitus_valgus	Congenital_muscular_dystrophy	Joint_hyperflexibility	Wide_intermamillary_distance	Decreased_testicular_size
Congenital_muscular_dystrophy-respiratory_failure-skin_abnormalities-joint_hyperlaxity_syndrome	Rare_neurologic_disease	Joint_laxity	Respiratory_insufficiency_due_to_muscle_weakness	EMG:_myopathic_abnormalities	Follicular_hyperkeratosis	High_palate	Neck_muscle_weakness	Pectus_excavatum	Dry_skin	Motor_delay	Generalized_hypotonia	Gastroesophageal_reflux	Recurrent_respiratory_infections	Poor_head_control	Scoliosis	Spinal_rigidity	Increased_variability_in_muscle_fiber_diameter	Centrally_nucleated_skeletal_muscle_fibers	Limb_muscle_weakness	Minicore_myopathy	Abnormal_elasticity_of_skin	Gastrostomy_tube_feeding_in_infancy	Feeding_difficulties	Cryptorchidism	Delayed_speech_and_language_development	Delayed_puberty	Weak_cry	Multiple_joint_contractures	Pes_valgus	Mildly_elevated_creatine_kinase	Overweight
Congenital_myasthenic_syndrome	Rare_neurologic_disease	Neck_muscle_weakness	Ptosis	Dysphagia	Poor_suck	Sudden_episodic_apnea	Fatigable_weakness	Proximal_muscle_weakness	Frontalis_muscle_weakness	Intermittent_episodes_of_respiratory_insufficiency_due_to_muscle_weakness	Feeding_difficulties	Ophthalmoplegia	Cyanosis	Intellectual_disability	Ataxia	Bulbar_palsy	Decreased_fetal_movement	Nasal_speech	Recurrent_respiratory_infections	Difficulty_walking	Arthrogryposis_multiplex_congenita	Apneic_episodes_precipitated_by_illness_fatigue_stress	Generalized_muscle_weakness	Easy_fatigability	Episodic_respiratory_distress	Spinal_deformities	Central_sleep_apnea	Nasal_regurgitation	Choking_episodes	EMG:_impaired_neuromuscular_transmission	Muscle_fiber_atrophy	High_palate	Long_face	Seizures	Motor_delay	Areflexia	Weak_cry	Dysphonia	Pes_cavus	Poor_head_control	Waddling_gait	Kyphoscoliosis	Spinal_rigidity	Limb-girdle_muscle_weakness	EMG:_myopathic_abnormalities	Distal_amyotrophy	Distal_lower_limb_muscle_weakness	Stridor	Central_hypotonia
Congenital_myasthenic_syndromes_with_glycosylation_defect	Rare_neurologic_disease	High_palate	Motor_delay	Areflexia	Generalized_hypotonia	Pes_planus	Myopathy	Limb-girdle_muscle_weakness	EMG:_decremental_response_of_compound_muscle_action_potential_to_repetitive_nerve_stimulation	Fatigable_weakness	Proximal_muscle_weakness	Abnormal_peripheral_nervous_system_synaptic_transmission	Favorable_response_of_weakness_to_acetylcholine_esterase_inhibitors	Increased_jitter_at_single_fibre_EMG	Muscle_fiber_tubular_inclusions	Ptosis	Flexion_contracture	Joint_laxity	Difficulty_walking	Frequent_falls	Poor_head_control	Waddling_gait	Scoliosis	Lumbar_hyperlordosis	Ragged-red_muscle_fibers	Elevated_serum_creatine_kinase	Easy_fatigability	Gowers_sign	Muscle_spasm	Difficulty_climbing_stairs	Scapular_winging	Type_1_muscle_fiber_predominance	Knee_flexion_contracture	Generalized_weakness_of_limb_muscles	Difficulty_running	Facial_palsy	Distal_muscle_weakness
Congenital_myopathy_with_myasthenic-like_onset	Rare_neurologic_disease	Proximal_muscle_weakness	Minicore_myopathy	Type_1_muscle_fiber_predominance	Infantile_axial_hypotonia	Fatigable_weakness	Ptosis	Motor_delay	Areflexia	Gait_disturbance	Failure_to_thrive	Malignant_hyperthermia	Myopathic_facies	Recurrent_respiratory_infections	Scoliosis	Multiple_joint_contractures	Myopathy	Easy_fatigability	EMG:_myopathic_abnormalities	Scapular_winging	Feeding_difficulties	Ophthalmoplegia	Respiratory_insufficiency_due_to_muscle_weakness	Rhabdomyolysis	Elevated_serum_creatine_kinase	Rectus_femoris_muscle_atrophy
Congenital_neuronal_ceroid_lipofuscinosis	Rare_neurologic_disease	Intracellular_accumulation_of_autofluorescent_lipopigment_storage_material	Spasticity	Central_sleep_apnea	Myoclonic_seizure	Neonatal_respiratory_distress	Elevated_serum_creatine_kinase	Increased_lactate_dehydrogenase_activity	EEG_with_burst_suppression	Cerebellar_hypoplasia	Cerebral_hypoplasia	Ventriculomegaly	Pachygyria	Diffuse_demyelination_of_the_cerebral_white_matter	Gliosis	Agenesis_of_corpus_callosum	Respiratory_failure	Abnormal_enzyme/coenzyme_activity	Status_epilepticus	Neuronal_loss_in_the_cerebral_cortex	Abnormal_astrocyte_morphology	Cerebellar_atrophy	Granular_osmiophilic_deposits_(GROD)_in_cells	Seizures	Apnea	Microcephaly	Low-set_ears	Aplasia/Hypoplasia_of_the_external_ear	Split_hand	Wide_nasal_bridge	Sloping_forehead
Continuous_spikes_and_waves_during_sleep	Rare_neurologic_disease	Seizures	Interictal_epileptiform_activity	Continuous_spike_and_waves_during_slow_sleep	Intellectual_disability	Generalized_tonic-clonic_seizures	Focal_aware_seizure	Developmental_regression	Focal_impaired_awareness_seizure	Hemiclonic_seizures	Atypical_absence_seizure	Focal-onset_seizure	Focal_motor_seizure	EEG_with_frontal_focal_spike_waves	EEG_with_centrotemporal_focal_spike_waves	Cognitive_impairment	Aggressive_behavior	Autistic_behavior	Dystonia	Psychotic_mentation	Focal_clonic_seizure	Clumsiness	Motor_deterioration	Aphasia	Hyperkinetic_movements	Speech_articulation_difficulties	Atonic_seizure	Speech_apraxia	Typical_absence_seizure	Myoclonic_absence	EEG_with_generalized_polyspikes
Corpus_callosum_agenesis-neuronopathy_syndrome	Rare_neurologic_disease	Microcephaly	Turricephaly	Strabismus	Myopia	Nystagmus	Intellectual_disability	Seizures	Global_developmental_delay	Agenesis_of_corpus_callosum	Craniosynostosis	EEG_abnormality	Aqueductal_stenosis	Hemiplegia/hemiparesis	Abnormality_of_retinal_pigmentation
Corticobasal_syndrome	Rare_neurologic_disease	Progressive_extrapyramidal_muscular_rigidity	Bradykinesia	Tremor	Frontal_release_signs	Sensory_impairment	Involuntary_movements	Myoclonus	Limb_apraxia	Gait_disturbance	Postural_instability	Dystonia	Aphasia	Speech_apraxia	Dysphasia	Memory_impairment	Abnormality_of_movement	Behavioral_abnormality	Dementia	Akinesia	Limb_dystonia	Limb_myoclonus	Oromotor_apraxia	Parkinsonism
Cranio-cervical_dystonia_with_laryngeal_and_upper-limb_involvement	Rare_neurologic_disease	Torticollis	Blepharospasm	Limb_dystonia	Upper_limb_postural_tremor	Vocal_tremor	Myoclonus	Abnormality_of_the_larynx	Hand_tremor	Oromandibular_dystonia
Crisponi_syndrome	Rare_neurologic_disease	Narrow_mouth	High_palate	Full_cheeks	Long_philtrum	Micrognathia	Wide_nose	Anteverted_nares	Hypohidrosis	Hyperhidrosis	Seizures	Hypertonia	Flexion_contracture	Limitation_of_joint_mobility	Death_in_infancy	Sudden_cardiac_death	Malignant_hyperthermia	Respiratory_insufficiency	Scoliosis	Kyphosis	Feeding_difficulties	Camptodactyly_of_finger	Cognitive_impairment	Large_face
Cyanide-induced_parkinsonism-dystonia	Rare_neurologic_disease	Mask-like_facies	Apathy	Dysarthria	Parkinsonism	Rigidity	Bradykinesia	Cerebral_cortical_atrophy	Neurological_speech_impairment	Postural_instability	Resting_tremor	Shuffling_gait	Anarthria	Falls	Elbow_flexion_contracture	Decreased_facial_expression	Generalized_hyperreflexia	Short_stepped_shuffling_gait	Hypometric_horizontal_saccades	Abnormality_of_skin_morphology	Subcortical_cerebral_atrophy
Deafness-small_bowel_diverticulosis-neuropathy_syndrome	Rare_neurologic_disease	Sensorineural_hearing_impairment	Malabsorption	Chronic_diarrhea	Hemiplegia	Steatorrhea	Duodenal_ulcer	EMG_abnormality	Cachexia	Ptosis	Abnormality_of_the_pharynx	Hyporeflexia	Neurological_speech_impairment	Abnormality_of_eye_movement	Cutaneous_photosensitivity	Brachydactyly	Short_palm
Delayed_encephalopathy_due_to_carbon_monoxide_poisoning	Rare_neurologic_disease	Behavioral_abnormality	Memory_impairment	Abnormality_of_the_periventricular_white_matter	Elevated_brain_choline_level_by_MRS	Reduced_brain_N-acetyl_aspartate_level_by_MRS	Rigidity	Bradykinesia	Abnormality_of_the_upper_limb	Decreased_facial_expression
Dentatorubral_pallidoluysian_atrophy	Rare_neurologic_disease	Dysdiadochokinesis	Progressive_cerebellar_ataxia	Ophthalmoparesis	Nystagmus	Dementia	Optic_neuropathy	Saccadic_smooth_pursuit	Seizures	Ataxia	Dysarthria	Hyporeflexia	Choreoathetosis	Dysmetria	Myoclonus	Gait_ataxia	Limb_ataxia	Truncal_ataxia	Action_tremor	Involuntary_movements	Impaired_proprioception	Dyssynergia	Hyperintensity_of_cerebral_white_matter_on_MRI	Cognitive_impairment	Blepharospasm	Memory_impairment	Oromandibular_dystonia
Dermatoleukodystrophy	Rare_neurologic_disease	Hyperkeratosis	Thickened_skin	Intellectual_disability	Reduced_tendon_reflexes	Hyperreflexia	Abnormality_of_nervous_system_morphology
Desminopathy	Rare_neurologic_disease	Distal_lower_limb_muscle_weakness	Neck_flexor_weakness	Weakness_of_facial_musculature	Concentric_hypertrophic_cardiomyopathy	Congestive_heart_failure	Atrioventricular_block	Supraventricular_arrhythmia	Loss_of_ability_to_walk	Respiratory_insufficiency_due_to_muscle_weakness	Progressive_muscle_weakness	Difficulty_walking	Fatigable_weakness_of_bulbar_muscles	Fatigable_weakness_of_respiratory_muscles	Sudden_cardiac_death	Areflexia_of_lower_limbs	Axial_muscle_weakness	Thoracic_kyphoscoliosis	Spinal_rigidity
Digital_extensor_muscle_aplasia-polyneuropathy	Rare_neurologic_disease	Aplasia/Hypoplasia_involving_the_skeletal_musculature	Skeletal_muscle_atrophy	Muscular_dystrophy	Impaired_pain_sensation	Abnormal_nerve_conduction_velocity	Camptodactyly_of_finger	Hypohidrosis	Heat_intolerance	Abnormality_of_temperature_regulation
Distal_anoctaminopathy	Rare_neurologic_disease	Progressive_muscle_weakness	Distal_lower_limb_muscle_weakness	Difficulty_walking	Waddling_gait	Muscle_stiffness	Difficulty_running	Highly_elevated_creatine_kinase	Distal_amyotrophy	Calf_muscle_pseudohypertrophy	Proximal_muscle_weakness_in_upper_limbs	Progressive_proximal_muscle_weakness	Rhabdomyolysis	Peroneal_muscle_atrophy
Distal_hereditary_motor_neuropathy_type_5	Rare_neurologic_disease	Unsteady_gait	Impaired_vibratory_sensation	First_dorsal_interossei_muscle_weakness	Thenar_muscle_atrophy	First_dorsal_interossei_muscle_atrophy	Thenar_muscle_weakness	Cold-induced_hand_cramps	Upper_limb_muscle_weakness	Distal_amyotrophy	Motor_polyneuropathy	Distal_lower_limb_muscle_weakness	Hyperreflexia	Pes_cavus	Hammertoe	Pes_valgus	Abnormal_motor_nerve_conduction_velocity
Distal_myopathy_Tateyama_type	Rare_neurologic_disease	EMG:_myopathic_abnormalities	Increased_variability_in_muscle_fiber_diameter	Calf_muscle_pseudohypertrophy	Progressive_pes_cavus	Intrinsic_hand_muscle_atrophy	Weakness_of_the_intrinsic_hand_muscles	Progressive_distal_muscle_weakness	Abnormal_muscle_fiber_protein_expression	Abnormal_levels_of_creatine_kinase_in_blood	Clumsiness	Hypercholesterolemia	Percussion-induced_rapid_rolling_muscle_contractions	Calf_muscle_hypoplasia	Neck_muscle_weakness	Palpitations	Myalgia	Areflexia	Distal_sensory_impairment
Distal_myopathy_Welander_type	Rare_neurologic_disease	Myopathy	EMG:_myopathic_abnormalities	Intrinsic_hand_muscle_atrophy	Distal_upper_limb_muscle_weakness	Foot_dorsiflexor_weakness	Weakness_of_long_finger_extensor_muscles	Clumsiness	Difficulty_walking	Steppage_gait	Rimmed_vacuoles	Distal_upper_limb_amyotrophy	Mildly_elevated_creatine_kinase	Cardiomyopathy
Distal_myopathy_with_anterior_tibial_onset	Rare_neurologic_disease	Absent_muscle_fiber_dysferlin	Abnormal_levels_of_creatine_kinase_in_blood	Exercise-induced_myalgia	Tibialis_muscle_weakness	Progressive_proximal_muscle_weakness	Limb-girdle_muscle_weakness	Absent_Achilles_reflex	Intrinsic_hand_muscle_atrophy	Weakness_of_the_intrinsic_hand_muscles	Finger_flexor_weakness	Neck_muscle_weakness	Sensory_impairment	Rimmed_vacuoles
Distal_myopathy_with_posterior_leg_and_anterior_hand_involvement	Rare_neurologic_disease	Finger_flexor_weakness	Distal_lower_limb_muscle_weakness	Intrinsic_hand_muscle_atrophy	Distal_upper_limb_muscle_weakness	Foot_dorsiflexor_weakness	Limited_knee_flexion	Hip_flexor_weakness	Gait_imbalance	Weakness_of_facial_musculature	Exercise-induced_myalgia	Hyporeflexia_of_lower_limbs	Dysphagia	Respiratory_insufficiency_due_to_muscle_weakness	Abnormality_of_the_cardiovascular_system	Inability_to_walk	Sensory_impairment	Difficulty_running	Fatiguable_weakness_of_proximal_limb_muscles	Difficulty_walking	Decreased_finger_mobility	Proximal_muscle_weakness_in_lower_limbs	Cardiomyopathy
Distal_myotilinopathy	Rare_neurologic_disease	Hyporeflexia	Difficulty_walking	Progressive_distal_muscle_weakness	Peripheral_neuropathy	Abnormal_muscle_fiber_myotilin	Dysarthria	Nasal_speech	Multiple_joint_contractures	Elevated_serum_creatine_kinase	EMG:_myopathic_abnormalities	Muscle_stiffness	Distal_amyotrophy	Loss_of_ability_to_walk_in_first_decade	Cardiomyopathy	Progressive_proximal_muscle_weakness
Distal_nebulin_myopathy	Rare_neurologic_disease	High_palate	EMG:_myopathic_abnormalities	Neck_flexor_weakness	Nemaline_bodies	Ankle_flexion_contracture	Weakness_of_the_intrinsic_hand_muscles	Foot_dorsiflexor_weakness	Progressive_distal_muscle_weakness	Weakness_of_long_finger_extensor_muscles	Sternocleidomastoid_amyotrophy	Slender_build	Exertional_dyspnea	Progressive_proximal_muscle_weakness	Fatty_replacement_of_skeletal_muscle	Weakness_of_facial_musculature	Cardiomyopathy
DNA2-related_mitochondrial_DNA_deletion_syndrome	Rare_neurologic_disease	Progressive_external_ophthalmoplegia	Limb-girdle_muscle_weakness	Depressivity	Gait_disturbance	Generalized_hypotonia	Slender_build	Decreased_fetal_movement	Difficulty_walking	Multiple_joint_contractures	Obstructive_sleep_apnea	Exertional_dyspnea	Myopathy	Hyperlordosis	Myalgia	Gowers_sign	Muscle_spasm	Mitochondrial_myopathy	Decreased_facial_expression	Congenital_ptosis	Elevated_creatine_kinase_after_exercise	Decreased_mitochondrial_number
DNM1L-related_encephalopathy_due_to_mitochondrial_and_peroxisomal_fission_defect	Rare_neurologic_disease	Abnormality_of_the_mitochondrion	Nystagmus	Optic_atrophy	Seizures	Global_developmental_delay	Absent_speech	Status_epilepticus	Increased_serum_lactate	Developmental_regression	Inability_to_walk	Elevated_brain_lactate_level_by_MRS	Brain_imaging_abnormality	Strabismus	Cerebellar_atrophy	Dystonia	Tremor	Bilateral_ptosis	Generalized_tonic-clonic_seizures	Generalized_myoclonic_seizures	Difficulty_walking	Dysphasia	Focal_impaired_awareness_seizure	Diffuse_cerebral_atrophy	Scoliosis	Skeletal_muscle_atrophy	Hyperactive_deep_tendon_reflexes	Focal-onset_seizure	Oculogyric_crisis	Gastrostomy_tube_feeding_in_infancy	Delayed_menarche
Dopa-responsive_dystonia	Rare_neurologic_disease	Dystonia	Behavioral_abnormality	Gait_disturbance	Tremor	Mood_changes	Rigidity	Difficulty_walking	Sleep_disturbance	Inability_to_walk	Decreased_CSF_homovanillic_acid	Oculogyric_crisis	Leg_dystonia	Abnormal_CSF_biopterin_level	Depressivity	Obsessive-compulsive_behavior	Short_attention_span	Irritability	Anxiety	Agoraphobia	Hyperhidrosis	Seizures	Lethargy	Dysarthria	Motor_delay	Parkinsonism	Slurred_speech	Vomiting	Constipation	Abnormality_of_extrapyramidal_motor_function	Ventriculomegaly	Postural_instability	Poor_coordination	Hypokinesia	Developmental_regression	Poor_head_control	Upper_motor_neuron_dysfunction	Fatigable_weakness	Excessive_salivation	Generalized_dystonia	Muscular_hypotonia_of_the_trunk	Severe_global_developmental_delay	Fatigue	Abnormal_social_behavior	Pain	Widened_subarachnoid_space	Panic_attack	Psychomotor_retardation	Arm_dystonia
Dopa-responsive_dystonia_due_to_sepiapterin_reductase_deficiency	Rare_neurologic_disease	Hypomimic_face	Abnormality_of_the_nose	Ptosis	Behavioral_abnormality	Delayed_speech_and_language_development	Hyperhidrosis	Intellectual_disability	Motor_delay	Muscle_weakness	Dystonia	Tremor	Hyperreflexia	Rigidity	Bradykinesia	Drowsiness	Sleep_disturbance	Limb_hypertonia	Temperature_instability	Muscular_hypotonia_of_the_trunk	Oculogyric_crisis	Cognitive_impairment	Microcephaly	Seizures	Growth_delay	Small_for_gestational_age	Cerebral_palsy
Dravet_syndrome	Rare_neurologic_disease	Developmental_regression	Progressive_gait_ataxia	Focal-onset_seizure	Limited_neck_range_of_motion	Autistic_behavior	Anxiety	Parkinsonism	Photomyoclonic_seizures	Myoclonus	Rigidity	Bradykinesia	Generalized_myoclonic_seizures	Focal_aware_seizure	Febrile_seizures	Focal_impaired_awareness_seizure	Cogwheel_rigidity	Hemiclonic_seizures	Photosensitive_tonic-clonic_seizures	Atypical_absence_seizure	Obsessive-compulsive_trait	Multifocal_epileptiform_discharges	Generalized_clonic_seizures	Complex_febrile_seizure	Interictal_epileptiform_activity	Facial_tics	Epilepsia_partialis_continua	Cognitive_impairment	Short_attention_span	Pallor	Pes_planus	Global_brain_atrophy	Drooling	Incoordination	Action_tremor	Limited_knee_extension	Poor_fine_motor_coordination	Pes_valgus	Infantile_muscular_hypotonia	EEG_with_focal_epileptiform_discharges	EEG_with_generalized_epileptiform_discharges	Dysgenesis_of_the_hippocampus	Status_epilepticus_without_prominent_motor_symptoms	Tibial_torsion	Impulsivity	Cyanotic_episode	Generalized_tonic_seizures
Duchenne_and_Becker_muscular_dystrophy	Rare_neurologic_disease	Intellectual_disability_mild	Gait_disturbance	Joint_stiffness	Hypertrophic_cardiomyopathy	Developmental_regression	Scoliosis	Slender_long_bone	Myopathy	Skeletal_muscle_atrophy	Elevated_serum_creatine_kinase	Hyperlordosis	EMG_abnormality	Reduced_bone_mineral_density
Duchenne_muscular_dystrophy	Rare_neurologic_disease	Delayed_speech_and_language_development	Global_developmental_delay	Motor_delay	Specific_learning_disability	Flexion_contracture	Cardiomyopathy	Respiratory_insufficiency	Waddling_gait	Scoliosis	Skeletal_muscle_atrophy	Elevated_serum_creatine_kinase	Progressive_muscle_weakness	Proximal_muscle_weakness	Calf_muscle_hypertrophy	Cognitive_impairment
Dysequilibrium_syndrome	Rare_neurologic_disease	Abnormality_of_the_eye	Strabismus	Abnormality_of_vision	Cataract	Intellectual_disability	Seizures	Ataxia	Muscular_hypotonia	Gait_disturbance	Hyperreflexia	Skeletal_muscle_atrophy	Short_stature	Cerebral_palsy	Abnormality_of_movement
Dystonia_16	Rare_neurologic_disease	Limb_dystonia	Torticollis	Dysarthria	Parkinsonism	Hyperreflexia	Dysphonia	Dysphagia	Bradykinesia	Postural_tremor	Orofacial_dyskinesia	Unsteady_gait	Abnormal_pyramidal_sign	Lower_limb_pain	Motor_delay	Intellectual_disability
Dystonia-aphonia_syndrome	Rare_neurologic_disease	Difficulty_in_tongue_movements	Dysarthria	Gait_disturbance	Dysphonia	Dysphagia	Impaired_mastication	Generalized_dystonia	Macroglossia	Seizures	Cerebellar_atrophy	Cerebral_atrophy	Unsteady_gait	Anarthria	Mixed_demyelinating_and_axonal_polyneuropathy	Slowed_horizontal_saccades	Abnormal_vocal_cord_morphology	Oromandibular_dystonia	Abnormal_mitochondrial_shape	Abnormal_urinary_odor	Gingival_overgrowth	Anxiety	Global_developmental_delay	Myoclonus	Cognitive_impairment
Dystonia-parkinsonism-hypermanganesemia_syndrome	Rare_neurologic_disease	Progressive_microcephaly	Hypomimic_face	Intellectual_disability	Spasticity	Global_developmental_delay	Cerebellar_atrophy	Parkinsonism	Dystonia	Tremor	Hyperreflexia	Cerebral_atrophy	Bradykinesia	Developmental_regression	Poor_speech	Bulbar_signs	Progressive_inability_to_walk	Scoliosis	Multiple_joint_contractures	Babinski_sign	Infantile_axial_hypotonia	Ankle_clonus	Oromandibular_dystonia	Scissor_gait	Hyperintensity_of_cerebral_white_matter_on_MRI	Hypermanganesemia	Dyskinesia
Early_infantile_epileptic_encephalopathy	Rare_neurologic_disease	Seizures	Intellectual_disability	Global_developmental_delay	EEG_abnormality	Sleep_disturbance	Poor_head_control	Hypsarrhythmia	Infantile_muscular_hypotonia	EEG_with_burst_suppression	Autistic_behavior	Hyperactivity	Spasticity	Choreoathetosis	Cerebellar_atrophy	Pachygyria	Myoclonus	Tremor	Generalized_tonic-clonic_seizures	Hypoplasia_of_the_corpus_callosum	Absence_seizure	Episodic_ataxia	Febrile_seizures	Developmental_regression	Diffuse_cerebral_atrophy	Diffuse_white_matter_abnormalities	Generalized_tonic_seizures	Atonic_seizure	EEG_with_spike-wave_complexes	Generalized_clonic_seizures	Uni-_and_bilateral_multifocal_epileptiform_discharges	Delayed_myelination	Infantile_spasms	Focal_seizures_afebril	Dyskinesia	Self-injurious_behavior	Micropenis	Ureterocele	Renal_dysplasia	Cleft_palate	Microcephaly	Sloping_forehead	Anteverted_nares	Strabismus	Precocious_puberty	Dystonia	Broad_finger	Failure_to_thrive	Umbilical_hernia
Early_myoclonic_encephalopathy	Rare_neurologic_disease	Myoclonus	Generalized_myoclonic_seizures	EEG_abnormality	Focal_motor_seizure	Eyelid_myoclonias	Infantile_spasms	Epileptic_encephalopathy	Muscular_hypotonia	Lethargy	Global_developmental_delay	Hyperreflexia	Dysphagia	Poor_suck	Recurrent_respiratory_infections	Focal_tonic_seizure	Feeding_difficulties	Hypsarrhythmia
Early-onset_autosomal_dominant_Alzheimer_disease	Rare_neurologic_disease	Agitation	Dementia	Hallucinations	Seizures	Hypertonia	Confusion	Parkinsonism	Myoclonus	Cerebral_cortical_atrophy	Neurofibrillary_tangles	Memory_impairment	Language_impairment	Deposits_immunoreactive_to_beta-amyloid_protein	Abnormal_social_behavior	Neurodevelopmental_abnormality	Disinhibition	Abnormality_of_vision	Oculomotor_apraxia	Intellectual_disability	Ataxia	Apraxia	Aphasia	Finger_agnosia	Dysgraphia	Abnormality_of_higher_mental_function	Semantic_dementia
Early-onset_cerebellar_ataxia_with_retained_tendon_reflexes	Rare_neurologic_disease	Progressive_cerebellar_ataxia	Nystagmus	Dysarthria	Dysphagia	Sensory_impairment	Lower_limb_hypertonia	Hyperactive_patellar_reflex	Progressive_gait_ataxia	Abnormal_pyramidal_sign	Hyperreflexia_in_upper_limbs	Jerky_ocular_pursuit_movements	Pes_cavus	Lower_limb_spasticity	Scoliosis	Abnormal_EKG	Generalized_amyotrophy	Lower_limb_muscle_weakness	Impaired_visuospatial_constructive_cognition	Cognitive_impairment	Decreased/absent_ankle_reflexes	Optic_atrophy	Diabetes_mellitus	Cardiomyopathy	Multiple_skeletal_anomalies
Early-onset_epileptic_encephalopathy-cortical_blindness-intellectual_disability-facial_dysmorphism_syndrome	Rare_neurologic_disease	Low_anterior_hairline	Broad_nasal_tip	Anteverted_nares	Telecanthus	Periorbital_fullness	Poor_eye_contact	Intellectual_disability	Hypoplasia_of_the_corpus_callosum	Poor_speech	Generalized_tonic_seizures	Multifocal_epileptiform_discharges	Occipital_cortical_atrophy	Hypoplasia_of_the_pons	Cerebral_visual_impairment	Everted_lower_lip_vermilion	Short_philtrum	Narrow_forehead	Bulbous_nose	Prominent_nasal_bridge	Long_eyelashes	Anophthalmia	Thick_eyebrow	Synophrys	Stereotypy	Muscular_hypotonia	Myoclonus	Absence_seizure	Focal_impaired_awareness_seizure	Hypsarrhythmia	Inability_to_walk	Large_earlobe	Prominent_ear_helix	Atonic_seizure	Infantile_spasms	Thick_vermilion_border	Abnormal_spaced_incisors
Early-onset_generalized_limb-onset_dystonia	Rare_neurologic_disease	Hypertonia	Gait_disturbance	Abnormality_of_the_voice	Abnormality_of_the_musculature	Abnormality_of_movement
Early-onset_Lafora_body_disease	Rare_neurologic_disease	Myoclonus	Lafora_bodies	Behavioral_abnormality	Dysarthria	Hyperreflexia	Seizures	Ataxia	Mental_deterioration	Spastic_tetraparesis	Confusion	Mutism	Paranoia
Early-onset_progressive_encephalopathy-spastic_ataxia-distal_spinal_muscular_atrophy_syndrome	Rare_neurologic_disease	Progressive_encephalopathy	Spastic_ataxia	Distal_amyotrophy	Spinal_muscular_atrophy	Intellectual_disability	Dysarthria	Global_developmental_delay	Cerebellar_atrophy	Generalized_hypotonia	Hypoplasia_of_the_corpus_callosum	Developmental_regression	EMG:_chronic_denervation_signs	Peripheral_axonal_neuropathy	Difficulty_standing	Foot_dorsiflexor_weakness	Optic_atrophy	Spastic_tetraparesis	Anarthria	Scoliosis	Progressive_spastic_paraparesis	Iron_accumulation_in_substantia_nigra	Seizures	Hypoparathyroidism	Growth_delay
Early-onset_schizophrenia	Rare_neurologic_disease	Psychosis	Behavioral_abnormality	Emotional_lability	Depressivity	Autism	Autistic_behavior	Short_attention_span	Irritability	Hallucinations	Anxiety	Delusions	Confusion	Specific_learning_disability	Mood_changes	Lack_of_peer_relationships	Language_impairment	No_social_interaction	Addictive_behavior	Impairment_in_personality_functioning	Low_self_esteem	Cognitive_impairment	Restlessness	Obsessive-compulsive_behavior	Diminished_motivation	Personality_changes	Anorexia	Visual_hallucinations	Polyphagia	Attention_deficit_hyperactivity_disorder	Oppositional_defiant_disorder	Paranoia	Anhedonia	Abnormal_temper_tantrums	Sleep_onset_Insomnia	Unhappy_demeanor	Suicidal_ideation	Abnormal_emotion/affect_behavior	Shyness	Auditory_hallucinations	Decreased_female_libido	Decreased_male_libido	Mania	Hypersomnia
Early-onset_spastic_ataxia-myoclonic_epilepsy-neuropathy_syndrome	Rare_neurologic_disease	Ptosis	Oculomotor_apraxia	Ataxia	Intellectual_disability_mild	Spasticity	Cerebellar_atrophy	Dysmetria	Cerebellar_hypoplasia	Dystonia	Myoclonus	Dysphagia	Generalized_tonic-clonic_seizures	Dysdiadochokinesis	Generalized_myoclonic_seizures	Spastic_paraparesis	EEG_abnormality	Distal_muscle_weakness	Spastic_dysarthria	Peripheral_axonal_neuropathy	Distal_amyotrophy	Demyelinating_peripheral_neuropathy	Sensorimotor_neuropathy	Lower_limb_muscle_weakness	Abnormal_mitochondria_in_muscle_tissue
EAST_syndrome	Rare_neurologic_disease	Renal_salt_wasting	Sensorineural_hearing_impairment	Increased_circulating_renin_level	Hyperaldosteronism	Intellectual_disability	Seizures	Ataxia	Global_developmental_delay	Generalized-onset_seizure	Hypokalemia	Hypomagnesemia	Renal_magnesium_wasting	Abnormal_urinary_electrolyte_concentration	Renal_sodium_wasting	Salt_craving	Metabolic_alkalosis	Enuresis	Polydipsia	Action_tremor	Cerebellar_atrophy	Absent_speech	Difficulty_walking	Inability_to_walk	Peripheral_axonal_neuropathy	Peripheral_hypomyelination	Lower_limb_muscle_weakness
Emery-Dreifuss_muscular_dystrophy	Rare_neurologic_disease	Obesity	Dilated_cardiomyopathy	Atrioventricular_block	Pectus_excavatum	Reduced_tendon_reflexes	Joint_stiffness	Myotonia	Myopathy	Elevated_serum_creatine_kinase	Limb-girdle_muscular_dystrophy	Sprengel_anomaly	Gait_disturbance	Achilles_tendon_contracture	Hypertriglyceridemia	Waddling_gait	Elbow_flexion_contracture	Increased_LDL_cholesterol_concentration	Spinal_rigidity	Back_pain	EMG:_myopathic_abnormalities	Scapular_winging	Rimmed_vacuoles	Decreased_cervical_spine_flexion_due_to_contractures_of_posterior_cervical_muscles	Proximal_upper_limb_amyotrophy	Proximal_lower_limb_amyotrophy	Proximal_muscle_weakness_in_lower_limbs	Proximal_muscle_weakness_in_upper_limbs	Type_1_muscle_fiber_atrophy	Absent_muscle_fiber_emerin	Toe_walking	Ptosis	Muscular_hypotonia	Scoliosis	Kyphosis	Hyperlordosis	Supraventricular_arrhythmia	Ichthyosis	Lipodystrophy	Vocal_cord_paralysis	Hypertrophic_cardiomyopathy	Sudden_cardiac_death	Respiratory_insufficiency_due_to_muscle_weakness	Ventricular_escape_rhythm	Intellectual_disability
Encephalopathy_due_to_prosaposin_deficiency	Rare_neurologic_disease	Abnormality_of_eye_movement	Muscular_hypotonia	Dystonia	Myoclonus	Death_in_infancy	Splenomegaly	Generalized_tonic-clonic_seizures	Respiratory_insufficiency	Recurrent_respiratory_infections	Hepatomegaly
Epilepsy-telangiectasia_syndrome	Rare_neurologic_disease	Abnormality_of_the_dentition	Long_philtrum	Anteverted_nares	Conjunctival_telangiectasia	Intellectual_disability	Seizures	Decreased_circulating_IgA_level	Decreased_antibody_level_in_blood	Short_stature	Short_5th_finger
Episodic_ataxia_type_1	Rare_neurologic_disease	Postural_instability	Poor_coordination	Myokymia	Blurred_vision	Diplopia	Hyperhidrosis	Dysarthria	Nausea	Clumsiness	Headache	Vertigo	Muscle_spasm	Muscle_stiffness	Delayed_speech_and_language_development	Hand_clenching	Choreoathetosis	Motor_delay	Cerebellar_atrophy	Hypertonia	Specific_learning_disability	Respiratory_distress	Myotonia	Scoliosis	Kyphoscoliosis	Craniofacial_disproportion	Calf_muscle_hypertrophy	Tip-toe_gait
Episodic_ataxia_type_3	Rare_neurologic_disease	Episodic_ataxia	Vertigo	Migraine	Tinnitus	Myokymia	Nystagmus	Seizures	Hemiplegia	Headache
Episodic_ataxia_type_4	Rare_neurologic_disease	Ataxia	Abnormality_of_ocular_smooth_pursuit	Gaze-evoked_nystagmus	Diplopia	Postural_instability	Incoordination	Vertigo	Frequent_falls	Abnormal_head_movements	Nausea
Episodic_ataxia_type_5	Rare_neurologic_disease	Gaze-evoked_nystagmus	Ataxia	Dysarthria	Truncal_ataxia	Postural_instability	Vertigo
Episodic_ataxia_type_6	Rare_neurologic_disease	Photophobia	Ataxia	Nausea_and_vomiting	Vertigo	Phonophobia	Gaze-evoked_nystagmus	Diplopia	Seizures	Cerebellar_atrophy	Slurred_speech	Migraine	Hemiplegia	Headache	Reduced_visual_acuity
Episodic_ataxia_type_7	Rare_neurologic_disease	Dysarthria	Muscle_weakness	Episodic_ataxia	Vertigo	Nystagmus	Tinnitus	Diplopia	Migraine	Myokymia	Hyperkinetic_movements	Cognitive_impairment
Episodic_ataxia_with_slurred_speech	Rare_neurologic_disease	Muscle_weakness	Slurred_speech	Postural_instability	Nystagmus	Dysarthria	Tremor	Gait_ataxia	Abnormal_involuntary_eye_movements	Migraine	Myokymia
Ethylmalonic_encephalopathy	Rare_neurologic_disease	Encephalopathy	Ethylmalonic_aciduria	Petechiae	Acrocyanosis	Intellectual_disability	Seizures	Ataxia	Generalized_hypotonia	Failure_to_thrive	Diarrhea	Abnormality_of_extrapyramidal_motor_function	Developmental_regression	Lactic_acidosis	Abnormal_pyramidal_sign	Abnormal_basal_ganglia_MRI_signal_intensity	Neurodevelopmental_delay	Retinal_vascular_tortuosity	Abnormal_brainstem_MRI_signal_intensity
Exercise-induced_malignant_hyperthermia	Rare_neurologic_disease	Abnormality_of_the_nervous_system	Malignant_hyperthermia	Nausea	Headache	Vertigo	Tachypnea	Sinus_tachycardia	Fatigue	Abnormal_pulse_pressure	Seizures	Ataxia	Lethargy	Confusion	Muscle_weakness	Decreased_liver_function	Prolonged_QT_interval	Abnormal_bleeding	Vomiting	Hyperkalemia	Hypotension	Hypocalcemia	Hyperphosphatemia	Lactic_acidosis	Elevated_serum_creatine_kinase	Abnormality_of_the_coagulation_cascade	Exercise-induced_muscle_cramps	Abnormal_T-wave	ST_segment_depression	Hypocapnia	Crackles	Delirium	Flushing	Oliguria	Dry_skin	Anhidrosis	Hepatic_failure	Thrombocytopenia	Acute_kidney_injury	Hepatic_encephalopathy	Rhabdomyolysis	Disseminated_intravascular_coagulation
Facial_onset_sensory_and_motor_neuronopathy	Rare_neurologic_disease	Dysarthria	Muscle_weakness	Dysphagia	Fasciculations	Skeletal_muscle_atrophy	Muscle_spasm	Paresthesia
Facioscapulohumeral_dystrophy	Rare_neurologic_disease	Mask-like_facies	Sensorineural_hearing_impairment	Abnormal_eyelash_morphology	Malformation_of_the_heart_and_great_vessels	Skeletal_muscle_atrophy	Elevated_serum_creatine_kinase	Hyperlordosis	EMG_abnormality	Abnormal_retinal_vascular_morphology	Palpebral_edema
Familial_acute_necrotizing_encephalopathy	Rare_neurologic_disease	Coma	Increased_CSF_protein	Acute_encephalopathy	Intellectual_disability	Seizures	Spasticity	Dysarthria	Hypertonia	Gait_disturbance	Fever	Vomiting	Rigidity	Gliosis	Cerebral_edema	Abnormality_of_brainstem_morphology	Developmental_regression	Spastic_tetraplegia	Abnormal_pattern_of_respiration	Generalized_muscle_weakness	Abnormality_of_thalamus_morphology	Choroid_hemorrhage	Abnormal_brainstem_MRI_signal_intensity	Abnormal_visual_fixation	Abnormal_putamen_morphology
Familial_Alzheimer-like_prion_disease	Rare_neurologic_disease	Behavioral_abnormality	Emotional_lability	Depressivity	Anxiety	Specific_learning_disability	Sleep_disturbance	Deficit_in_phonologic_short-term_memory	Attention_deficit_hyperactivity_disorder	Abdominal_symptom	Perseveration	Jaw_pain	Cognitive_impairment
Familial_cerebral_saccular_aneurysm	Rare_neurologic_disease	Cerebral_berry_aneurysm	Hypertension	Visual_field_defect	Seizures	Hemiparesis	Transient_ischemic_attack	Abnormality_of_brainstem_morphology	Atherosclerosis	Abnormality_of_circle_of_Willis	Subarachnoid_hemorrhage	Intracranial_hemorrhage	Dilatation_of_ascending_aorta	Aortic_dissection	Oculomotor_nerve_palsy	Encephalomalacia
Familial_cervical_artery_dissection	Rare_neurologic_disease	Diabetes_mellitus	Hypertension	Thin_skin	Striae_distensae	Stroke	Migraine	Subarachnoid_hemorrhage	Headache	Transient_ischemic_attack	Dysphasia	Cerebral_ischemia	Abnormal_circulating_lipid_concentration	Paresthesia	Paralysis	Abnormality_of_connective_tissue	Dilatation_of_the_cerebral_artery	Recurrent_cerebral_hemorrhage	Carotid_artery_tortuosity	Arterial_fibromuscular_dysplasia	Facial_palsy	Carotid_artery_dissection	Carotid_artery_dilatation
Familial_congenital_mirror_movements	Rare_neurologic_disease	Bimanual_synkinesia	Clumsiness	Abnormality_of_the_corticospinal_tract	Easy_fatigability	Poor_fine_motor_coordination	Abnormality_of_movement	Agenesis_of_corpus_callosum	Specific_learning_disability	Myalgia	Dysgenesis_of_the_hippocampus	Hypogonadotrophic_hypogonadism	Intellectual_disability_mild	Fused_cervical_vertebrae	Cerebral_palsy
Familial_developmental_dysphasia	Rare_neurologic_disease	Dysphasia	Expressive_language_delay	Incomprehensible_speech
Familial_dysautonomia	Rare_neurologic_disease	Abnormality_of_the_kidney	Renal_insufficiency	Alacrima	Myopia	Abnormal_pupil_morphology	Optic_atrophy	Behavioral_abnormality	Hypertension	Hypohidrosis	Hyperhidrosis	Acrocyanosis	Heterochromia_iridis	Seizures	Ataxia	Muscular_hypotonia	Hyporeflexia	Orthostatic_hypotension	Gait_disturbance	Growth_delay	Tachycardia	Gastroesophageal_reflux	Malignant_hyperthermia	Abnormality_of_the_pleura	Recurrent_respiratory_infections	Abnormality_of_the_peritoneum	Scoliosis	Recurrent_fractures	Osteolysis	Hyponatremia	EMG_abnormality	Impaired_pain_sensation	Corneal_opacity	Feeding_difficulties_in_infancy	Peripheral_neuropathy	Avascular_necrosis	Glomerulopathy	Corneal_erosion
Familial_dyskinesia_and_facial_myokymia	Rare_neurologic_disease	Facial_myokymia	Orofacial_dyskinesia	Dysarthria	Dystonia	Myoclonus	Chorea	Resting_tremor	Difficulty_walking	Limb_hypertonia	Muscular_hypotonia_of_the_trunk	Hyperreflexia	Congestive_heart_failure	Dilated_cardiomyopathy	Delayed_gross_motor_development	Intellectual_disability
Familial_focal_epilepsy_with_variable_foci	Rare_neurologic_disease	Focal-onset_seizure	EEG_with_focal_epileptiform_discharges	Generalized_tonic-clonic_seizures	Interictal_EEG_abnormality	Nocturnal_seizures	Behavioral_abnormality	Autistic_behavior	Pallor	Intellectual_disability	Focal_aware_seizure	Visual_hallucinations	Focal_impaired_awareness_seizure	Motor_aphasia	Paresthesia	Auditory_hallucinations	Multifocal_epileptiform_discharges	Deja_vu	Infantile_spasms	Pain	Flushing	Focal_cortical_dysplasia	Cognitive_impairment	Polymicrogyria	Hypsarrhythmia	Hemimegalencephaly	Simple_febrile_seizures
Familial_infantile_myoclonic_epilepsy	Rare_neurologic_disease	Seizures	Generalized_myoclonic_seizures	Dysarthria	Cerebellar_atrophy	Thick_cerebral_cortex	Focal-onset_seizure	Simple_febrile_seizures	EEG_with_focal_spike_waves	Generalized_tonic-clonic_seizures_without_focal_onset	Interictal_EEG_abnormality	Proptosis	Blepharospasm	Delayed_speech_and_language_development	Ataxia	Intellectual_disability_mild	Global_developmental_delay	Motor_delay	Gait_disturbance	Generalized_tonic-clonic_seizures	Clumsiness	Intellectual_disability_moderate	Intellectual_disability_borderline	Abnormal_morphology_of_the_hippocampus	Periventricular_nodular_heterotopia	Limb_myoclonus
Familial_or_sporadic_hemiplegic_migraine	Rare_neurologic_disease	Muscle_weakness	Migraine_with_aura	Neurological_speech_impairment	EEG_abnormality	Focal_motor_seizure	Focal_sensory_seizure	Hearing_impairment	Scotoma	Diplopia	Dysarthria	Hemiparesis	Confusion	Tongue_fasciculations	Postural_instability	Cerebral_edema	Vertigo	Increased_CSF_protein	Paresthesia	Involuntary_movements	Progressive_gait_ataxia	Dissociated_sensory_loss	Complex_febrile_seizure	Facial_tics	CSF_pleocytosis	Metamorphopsia	Photopsia	CSF_lymphocytic_pleiocytosis	Tinnitus	Coma	Cerebellar_atrophy	Hemiplegia	Dysphasia	Impaired_thermal_sensitivity	Facial_paralysis	Gaze-evoked_horizontal_nystagmus	Distal_upper_limb_muscle_weakness	Vertical_nystagmus	Spontaneous_pain_sensation	EEG_with_generalized_sharp_slow_waves	Seesaw_nystagmus	Nuchal_rigidity	Decreased_vigilance	Alien_limb_phenomenon	Intellectual_disability	Status_epilepticus	First_dorsal_interossei_muscle_weakness	EEG_with_focal_sharp_waves	Amaurosis_fugax
Familial_paroxysmal_ataxia	Rare_neurologic_disease	Nystagmus	Ataxia	Vertigo	Tinnitus	Diplopia	Dysarthria	Dystonia	Nausea_and_vomiting	Migraine	Hemiplegia	Torticollis	Behavioral_abnormality	Intellectual_disability	Cerebellar_vermis_atrophy
Fatty_acid_hydroxylase-associated_neurodegeneration	Rare_neurologic_disease	Progressive_spastic_paraplegia	Progressive_spastic_quadriplegia	Upper_motor_neuron_dysfunction	Progressive_extrapyramidal_movement_disorder	Generalized_dystonia	Progressive_gait_ataxia	Dysarthria	Dysphagia	Optic_atrophy	Slow_decrease_in_visual_acuity	Visual_field_defect	Color_vision_test_abnormality	Strabismus	Horizontal_nystagmus	Supranuclear_gaze_palsy	Focal_seizures_afebril	Cerebellar_atrophy	Cerebellar_vermis_atrophy	Atrophy_of_the_spinal_cord	Hypoplasia_of_the_corpus_callosum	Mental_deterioration	Progressive_inability_to_walk	Falls	Progressive_spastic_paraparesis	Loss_of_ability_to_walk	Anarthria	Motor_aphasia	Peripheral_neuropathy	Generalized_tonic-clonic_seizures	Anxiety	Depressivity	Bipolar_affective_disorder
Febrile_infection-related_epilepsy_syndrome	Rare_neurologic_disease	Sinusitis	Behavioral_abnormality	Lethargy	Sudden_death	Fever	Headache	EEG_abnormality	Developmental_regression	Autoimmunity	Myalgia	Focal-onset_seizure	Cough
Finnish_upper_limb-onset_distal_myopathy	Rare_neurologic_disease	Clumsiness	Difficulty_walking	Distal_sensory_impairment	Steppage_gait	EMG:_myopathic_abnormalities	Rimmed_vacuoles	Mildly_elevated_creatine_kinase	Intrinsic_hand_muscle_atrophy	Weakness_of_the_intrinsic_hand_muscles	Amyotrophy_of_ankle_musculature	Progressive_distal_muscle_weakness	Joint_contracture_of_the_hand	Fatty_replacement_of_skeletal_muscle	Split_hand	Progressive_proximal_muscle_weakness	Cardiomyopathy
Focal_myositis	Rare_neurologic_disease	Muscle_weakness	Limitation_of_joint_mobility	Weight_loss	Fever	Elevated_serum_creatine_kinase	Myalgia	Myositis
Foix-Alajouanine_syndrome	Rare_neurologic_disease	Abnormality_of_the_nervous_system	Myelopathy	Arteriovenous_fistula	Abnormal_subarachnoid_space_morphology	Venous_malformation	Hyperintensity_of_MRI_T2_signal_of_the_spinal_cord	Spinal_cord_lesion	Areflexia	Muscle_weakness	Hyperreflexia	Back_pain	Progressive_spastic_paraparesis	Myelitis	Functional_abnormality_of_the_bladder	Neurogenic_bladder	Urinary_retention	Urinary_incontinence	Gait_imbalance	Unsteady_gait	Difficulty_walking	Frequent_falls	Bowel_incontinence	Paresthesia	Low_back_pain	Sensory_impairment	Lower_limb_muscle_weakness	Distal_lower_limb_muscle_weakness	Colonic_inertia	Dysesthesia	Female_sexual_dysfunction	Male_sexual_dysfunction	Cervical_myelopathy	Distal_lower_limb_amyotrophy
Foix-Chavany-Marie_syndrome	Rare_neurologic_disease	Abnormal_thumb_morphology	Seizures	Global_developmental_delay	Gait_disturbance	Absent_speech	Abnormality_of_the_voice	Maternal_diabetes	Cognitive_impairment
Folinic_acid-responsive_seizures	Rare_neurologic_disease	Seizures	Ataxia	Global_developmental_delay	Decreased_CSF_5-methyltetrahydrofolate_concentration	Behavioral_abnormality	Autistic_behavior	Cerebellar_atrophy	Encephalopathy	Respiratory_distress	Abdominal_distention	Functional_motor_deficit	Cerebral_hypomyelination	Multifocal_epileptiform_discharges	EEG_with_generalized_slow_activity	Delayed_myelination	Elevated_CSF_neopterin_level	Sensorineural_hearing_impairment	Myopia	Optic_atrophy	Irritability	Hypertonia	Spastic_tetraparesis	Dystonia	Hyperreflexia	Chorea	Apnea	Generalized_myoclonic_seizures	Status_epilepticus	Broad-based_gait	Difficulty_walking	Sleep_disturbance	Developmental_regression	Poor_speech	Hypsarrhythmia	Frontotemporal_cerebral_atrophy	Atonic_seizure	Clonic_seizure	Abnormality_of_movement
FOXG1_syndrome	Rare_neurologic_disease	Progressive_microcephaly	Strabismus	Stereotypy	Muscular_hypotonia	Motor_delay	Difficulty_walking	Feeding_difficulties	Dyskinesia	Visual_impairment	Autistic_behavior	Paroxysmal_bursts_of_laughter	Poor_eye_contact	Spasticity	Choreoathetosis	Abnormal_corpus_callosum_morphology	Dystonia	Myoclonus	Absent_speech	Constipation	Gastroesophageal_reflux	Generalized_tonic-clonic_seizures	Orofacial_dyskinesia	Sleep_disturbance	Hyperkinetic_movements	Bruxism	Excessive_salivation	Short_stature	Decreased_body_weight	Focal-onset_seizure	Severe_postnatal_growth_retardation	Severe_global_developmental_delay	Delayed_myelination	Infantile_spasms	Inappropriate_crying	Abnormality_of_movement	Cognitive_impairment	Impaired_social_interactions	Agenesis_of_corpus_callosum	Pachygyria	Hypoplasia_of_the_corpus_callosum	Developmental_regression	Poor_speech	Inability_to_walk	Scoliosis	Kyphoscoliosis	Functional_respiratory_abnormality	Optic_disc_hypoplasia	Status_epilepticus
FOXG1_syndrome_due_to_14q12_microdeletion	Rare_neurologic_disease	Macroglossia	Everted_lower_lip_vermilion	Microcephaly	Epicanthus	Mandibular_prognathia	Smooth_philtrum	Protruding_ear	Bulbous_nose	Downslanted_palpebral_fissures	Blepharophimosis	Stereotypy	Seizures	Muscular_hypotonia	Agenesis_of_corpus_callosum	Absent_speech	Growth_delay	Gastroesophageal_reflux	Developmental_regression	Scoliosis	Kyphosis	Short_nose	Excessive_salivation	Depressed_nasal_bridge	Prominent_metopic_ridge	Abnormality_of_the_antihelix	Tented_upper_lip_vermilion	Intellectual_disability_severe	Feeding_difficulties	Palpebral_edema
Fragile_X-associated_tremor/ataxia_syndrome	Rare_neurologic_disease	Depressivity	Obsessive-compulsive_behavior	Dementia	Anxiety	Impotence	Hypothyroidism	Hypertension	Ataxia	Dysarthria	Hyporeflexia	Gait_disturbance	Parkinsonism	Dysmetria	Muscle_weakness	Dysphagia	Rigidity	Gait_ataxia	Bradykinesia	Intention_tremor	Cerebral_cortical_atrophy	Memory_impairment	Abnormality_of_brainstem_morphology	Dysautonomia	Bowel_incontinence	Hypotension	Urinary_bladder_sphincter_dysfunction	Myalgia	Peripheral_neuropathy	Dysesthesia	Inertia	Diffuse_cerebellar_atrophy	Pollakisuria
Friedreich_ataxia	Rare_neurologic_disease	Gait_ataxia	Dysarthria	Limb_ataxia	Gait_imbalance	Babinski_sign	Hand_muscle_atrophy	Impaired_proprioception	Abnormal_saccadic_eye_movements	Nystagmus	Optic_atrophy	Dysmetria	Muscle_weakness	Cardiomyopathy	Abnormality_of_the_foot	Pes_cavus	Intention_tremor	Areflexia_of_lower_limbs	Falls	Scoliosis	Urinary_bladder_sphincter_dysfunction	Sensory_axonal_neuropathy	Poor_fine_motor_coordination	Cervical_spinal_cord_atrophy	Impaired_visually_enhanced_vestibulo-ocular_reflex	Hearing_impairment	Diabetes_mellitus	Spasticity	Dystonia	Dysphagia	Chorea	Inability_to_walk	Incomprehensible_speech	Decreased_motor_nerve_conduction_velocity	Reduced_visual_acuity
Frontotemporal_dementia_with_motor_neuron_disease	Rare_neurologic_disease	Abnormal_upper_motor_neuron_morphology	Frontotemporal_dementia	Abnormal_lower_motor_neuron_morphology	Behavioral_abnormality	Depressivity	Hallucinations	Apathy	Dysarthria	Parkinsonism	Dysphagia	Abnormality_of_extrapyramidal_motor_function	Progressive_cerebellar_ataxia	Gliosis	Apraxia	Tetraparesis	Degeneration_of_the_lateral_corticospinal_tracts	Paraparesis	Dyscalculia	Distal_muscle_weakness	Generalized_amyotrophy	Proximal_muscle_weakness	Neuronal_loss_in_the_cerebral_cortex	Weakness_due_to_upper_motor_neuron_dysfunction	Supranuclear_gaze_palsy	Disinhibition	Hyporeflexia	Bulbar_palsy	Global_brain_atrophy	Mutism	Fasciculations	Babinski_sign	Abnormal_mitochondrial_morphology	Bilateral_sensorineural_hearing_impairment	Perseveration	Ptosis
Generalized_epilepsy_with_febrile_seizures-plus	Rare_neurologic_disease	Generalized-onset_seizure	Absence_seizure	Febrile_seizures	Ataxia	Muscular_hypotonia	Generalized_tonic-clonic_seizures	Generalized_myoclonic_seizures	Incoordination	Developmental_regression	Cortical_dysplasia	Poor_fine_motor_coordination	Generalized_cerebral_atrophy/hypoplasia	Atonic_seizure	EEG_with_spike-wave_complexes	Obtundation_status	Cognitive_impairment	Autistic_behavior	Anxiety	Tremor	Pes_planus	Bradykinesia	Status_epilepticus	Focal_impaired_awareness_seizure	Limited_knee_extension	Talipes_valgus	Focal-onset_seizure	Obsessive-compulsive_trait	Tibial_torsion
Generalized_epilepsy-paroxysmal_dyskinesia_syndrome	Rare_neurologic_disease	Generalized-onset_seizure	Paroxysmal_dyskinesia	EEG_with_spike-wave_complexes_(&gt;3.5_Hz)	Esotropia	Nystagmus	Global_developmental_delay	Generalized_hypotonia	Generalized_tonic-clonic_seizures	Chorea	Absence_seizure	Intellectual_disability_borderline
Gerstmann-Straussler-Scheinker_syndrome	Rare_neurologic_disease	Gait_ataxia	Lower_limb_muscle_weakness	Dysesthesia	Cognitive_impairment	Dementia	Dysarthria	Mental_deterioration	Areflexia	Reduced_tendon_reflexes	Abnormal_cerebellum_morphology	Morphological_abnormality_of_the_pyramidal_tract	Abnormality_of_extrapyramidal_motor_function	Sleep_disturbance	Paresthesia	Abnormality_of_central_sensory_function	Acroparesthesia	Brain_imaging_abnormality	Limb_myoclonus
Giant_axonal_neuropathy	Rare_neurologic_disease	Areflexia	Generalized_hypotonia	Joint_hypermobility	Pili_canaliculi	Difficulty_walking	Diffuse_axonal_swelling	CNS_hypomyelination	Proximal_muscle_weakness	Abnormality_of_the_Achilles_tendon	Intellectual_disability	Spasticity	Abnormal_cerebellum_morphology	Pes_cavus	Talipes_equinovarus	Woolly_hair	Unsteady_gait	Distal_muscle_weakness	Scoliosis	Distal_sensory_impairment	Abnormal_hand_morphology	Facial_palsy	Falls	Genu_valgum	Babinski_sign	Limb_muscle_weakness	Abnormality_of_the_pituitary_gland
Global_developmental_delay-neuro-ophthalmological_abnormalities-seizures-intellectual_disability_syndrome	Rare_neurologic_disease	Developmental_regression	Focal_impaired_awareness_seizure	Limb_hypertonia	Inability_to_walk	Impaired_smooth_pursuit	Infantile_muscular_hypotonia	EEG_with_generalized_epileptiform_discharges	Cerebral_visual_impairment	Overfolded_helix	Pectus_excavatum	Polymicrogyria	Delayed_myelination	Microcephaly	Global_developmental_delay	Generalized_hypotonia	Intellectual_disability	Seizures	Failure_to_thrive	Growth_delay	EEG_abnormality	Expressive_language_delay	Multifocal_epileptiform_discharges	Feeding_difficulties	Hydronephrosis	Cleft_palate	High_palate	Strabismus	Nystagmus	Generalized_tonic-clonic_seizures
Glossopharyngeal_neuralgia	Rare_neurologic_disease	Depressivity	Anxiety	Cranial_nerve_compression	Jaw_claudication	Ear_pain	Tongue_pain	Episodic_pain	Mandibular_pain	Abnormal_glossopharyngeal_nerve_morphology	Abnormal_palate_morphology	Seizures	Syncope	Vocal_cord_paralysis	Hoarse_voice	Bradycardia	Weight_loss	Headache	Dilatation	Neoplasm	Autoimmunity	Abnormality_of_the_cervical_spine	Malnutrition	Arnold-Chiari_type_I_malformation	Feeding_difficulties	Dysesthesia	Hyperalgesia	Odynophagia	Schwannoma	Oral-pharyngeal_dysphagia
Glycine_encephalopathy	Rare_neurologic_disease	Seizures	Hypoplasia_of_the_corpus_callosum	Hyperglycinemia	EEG_abnormality	EEG_with_burst_suppression	Central_hypotonia	Abnormal_metabolic_brain_imaging_by_MRS	Recurrent_singultus	Lethargy	Poor_suck	Generalized_myoclonic_seizures	Breathing_dysregulation	Respiratory_acidosis
GNE_myopathy	Rare_neurologic_disease	Rimmed_vacuoles	Lower_limb_muscle_weakness	Mildly_elevated_creatine_kinase	Tibialis_muscle_weakness	Foot_dorsiflexor_weakness	Fatty_replacement_of_skeletal_muscle	Muscle_fiber_inclusion_bodies	Hypothyroidism	Steppage_gait	Absent_Achilles_reflex	EMG:_myopathic_abnormalities	Shoulder_girdle_muscle_weakness	Increased_variability_in_muscle_fiber_diameter	Limited_wrist_extension	Limited_shoulder_movement	Hip_flexor_weakness	EMG:_positive_sharp_waves	EMG:_myotonic_discharges	Muscle_weakness	Abnormality_of_the_foot_musculature	Scapular_winging	Shoulder_girdle_muscle_atrophy	Lower_limb_amyotrophy	Facial_palsy	Abnormality_of_the_right_hemidiaphragm	Cardiomyopathy	Weakness_of_long_finger_extensor_muscles	Quadriceps_muscle_weakness
Growth_delay-intellectual_disability-hepatopathy_syndrome	Rare_neurologic_disease	Intellectual_disability	Growth_delay	Intrauterine_growth_retardation	Elevated_hepatic_transaminase	Psychomotor_retardation	Decreased_serum_zinc	Muscular_hypotonia	Absent_speech	Hepatic_fibrosis	Cholestasis	Hepatic_steatosis	Recurrent_infections	Feeding_difficulties	Duplicated_collecting_system	Hydronephrosis	Microcephaly	Full_cheeks	Round_face	Sensorineural_hearing_impairment	Autistic_behavior	Diabetes_mellitus	Hyperextensible_skin	Soft_doughy_skin	Seizures	Spasticity	Joint_laxity	Hepatic_failure	Hepatosplenomegaly	Oligohydramnios	Drumstick_terminal_phalanges	Dermal_translucency	Mild_global_developmental_delay	Abnormality_of_vitamin_D_metabolism	Esophagitis	Brain_imaging_abnormality
Haddad_syndrome	Rare_neurologic_disease	Sensorineural_hearing_impairment	Strabismus	Intellectual_disability	Seizures	Muscular_hypotonia	Failure_to_thrive	Small_for_gestational_age	Death_in_infancy	Decreased_fetal_movement	Polyhydramnios	Oligohydramnios	Gastroesophageal_reflux	Aganglionic_megacolon	Autonomic_dysregulation	Dysautonomia	Ganglioneuroma	Neuroblastoma	Breathing_dysregulation	Central_hypoventilation	Central_sleep_apnea
HANAC_syndrome	Rare_neurologic_disease	Renal_insufficiency	Muscle_spasm	Multiple_renal_cysts	Retinal_vascular_tortuosity	Hematuria
Hemidystonia-hemiatrophy_syndrome	Rare_neurologic_disease	Hemiparesis	Dystonia	Abnormality_of_the_periventricular_white_matter	Abnormal_basal_ganglia_MRI_signal_intensity	Abnormal_delivery	Limb_dystonia	Hemiatrophy	Abnormality_of_the_paranasal_sinuses	Dense_calvaria	Seizures	Babinski_sign	Abnormal_pyramidal_sign	Advanced_pneumatization_of_cranial_sinuses	Motor_delay	Rhizomelic_leg_shortening
Hemiparkinsonism-hemiatrophy_syndrome	Rare_neurologic_disease	Dysarthria	Hemiparesis	Generalized_hypotonia	Parkinsonism	Dystonia	Tremor	Bradykinesia	Hyperactive_deep_tendon_reflexes	Dilation_of_lateral_ventricles	Hemifacial_atrophy	Brain_atrophy	Neonatal_asphyxia	Hemiatrophy	Depressivity	Difficulty_walking	Scoliosis	Cerebral_cortical_hemiatrophy
Hereditary_continuous_muscle_fiber_activity	Rare_neurologic_disease	Congenital_diaphragmatic_hernia	Seizures	Ataxia	Dysarthria	Slurred_speech	Spastic_gait	Elevated_serum_creatine_kinase	EMG_abnormality	Type_1_muscle_fiber_predominance	Abnormality_of_movement
Hereditary_geniospasm	Rare_neurologic_disease	Chin_myoclonus	Abnormality_of_mentalis_muscle	Abnormality_of_lower_lip	Abnormal_social_behavior	Intention_tremor	EEG_abnormality	EMG_abnormality
Hereditary_hyperekplexia	Rare_neurologic_disease	Ataxia	Spasticity	Hypertonia	Myoclonus	Hyperreflexia	Joint_stiffness	Gastroesophageal_reflux	Hiatus_hernia	Rigidity	Fasciculations	Muscle_stiffness	Abnormality_of_movement	Esophagitis	Gait_disturbance	Umbilical_hernia	Sleep_disturbance	Hernia	Intellectual_disability	Seizures	Joint_dislocation	Hip_dislocation
Hereditary_late-onset_Parkinson_disease	Rare_neurologic_disease	Parkinsonism	Diplopia	Dysphagia	Akinesia	Resting_tremor	Frequent_falls	Parkinsonism_with_favorable_response_to_dopaminergic_medication	Hyposmia	Spastic/hyperactive_bladder	Chronic_constipation	Hypomimic_face	Agitation	Depressivity	Apathy	Low_frustration_tolerance	Mental_deterioration	Dystonia	Weight_loss	Rigidity	Bradykinesia	Cerebral_cortical_atrophy	Gliosis	Postural_instability	Sleep_disturbance	Shuffling_gait	Visual_hallucinations	Muscle_spasm	Orthostatic_hypotension_due_to_autonomic_dysfunction	Monotonic_speech	Lewy_bodies	Dyskinesia	Impulsivity	Dementia	Schizophrenia
Hereditary_myopathy_with_early_respiratory_failure	Rare_neurologic_disease	Gait_disturbance	Dyspnea	Restrictive_deficit_on_pulmonary_function_testing	Respiratory_insufficiency_due_to_muscle_weakness	Reduced_vital_capacity	Skeletal_muscle_atrophy	Elevated_serum_creatine_kinase	EMG:_myopathic_abnormalities	Muscle_fiber_splitting	Increased_variability_in_muscle_fiber_diameter	Neck_flexor_weakness	Type_1_muscle_fiber_predominance	Rimmed_vacuoles	Limited_hip_movement	Necrotizing_myopathy	Foot_dorsiflexor_weakness	Orthopnea	Internally_nucleated_skeletal_muscle_fibers	Distal_muscle_weakness	Proximal_muscle_weakness	Tibialis_muscle_weakness	Calf_muscle_hypertrophy	Muscle_fiber_hypertrophy	Falls
Hereditary_neurocutaneous_malformation	Rare_neurologic_disease	Abnormality_of_the_nervous_system	Hemangioma	Seizures	Horner_syndrome
Hereditary_neuropathy_with_liability_to_pressure_palsies	Rare_neurologic_disease	Hyporeflexia	Vocal_cord_paralysis	Abnormality_of_the_voice	Pes_cavus	Respiratory_insufficiency	Scoliosis	Paresthesia	Decreased_motor_nerve_conduction_velocity	Cranial_nerve_paralysis	Peripheral_neuropathy
Hereditary_sensory_and_autonomic_neuropathy_due_to_TECPR2_mutation	Rare_neurologic_disease	Recurrent_respiratory_infections	Brachycephaly	Microcephaly	Full_cheeks	Low_anterior_hairline	Round_face	Hypomimic_face	Short_neck	Broad_neck	Dental_crowding	Intellectual_disability	Dysarthria	Global_developmental_delay	Areflexia	Generalized_hypotonia	Dysmetria	Gait_ataxia	Short_stature	Seizures	Cerebellar_atrophy	Cerebral_atrophy	Hypoplasia_of_the_corpus_callosum	Central_apnea
Hereditary_sensory_and_autonomic_neuropathy_type_1	Rare_neurologic_disease	Inability_to_walk	Osteomyelitis	Pathologic_fracture	Neuropathic_arthropathy	Distal_amyotrophy	Motor_axonal_neuropathy	Cough	EMG:_slow_motor_conduction	Muscle_weakness	Gait_imbalance	Abnormality_of_the_autonomic_nervous_system	Distal_sensory_impairment	Decreased_amplitude_of_sensory_action_potentials	Impaired_ability_to_dress_oneself	Hyperkeratosis	Penetrating_foot_ulcers	Poor_wound_healing	Distal_muscle_weakness	Steppage_gait	Impaired_distal_tactile_sensation	Pain_insensitivity	Hypohidrosis_or_hyperhidrosis	Foot_dorsiflexor_weakness	Limb_pain	Impaired_temperature_sensation	Trophic_changes_related_to_pain	Skin_ulcer	Hearing_impairment	Gastroesophageal_reflux
Hereditary_sensory_and_autonomic_neuropathy_type_2	Rare_neurologic_disease	Hyperhidrosis	Tapered_finger	Dystrophic_toenail	Acroosteolysis_(feet)	Wormian_bones	Osteolysis	Abnormality_of_the_knee	Abnormality_of_the_ankles	Abnormal_cortical_bone_morphology	Skeletal_muscle_atrophy	Abnormality_of_the_hip_bone	Hyperlordosis	Reduced_bone_mineral_density	Abnormality_of_epiphysis_morphology	Dystrophic_fingernails
Hereditary_sensory_and_autonomic_neuropathy_type_4	Rare_neurologic_disease	Self-mutilation	Anhidrosis	Intellectual_disability	Recurrent_Staphylococcus_aureus_infections	Osteomyelitis	Abnormality_of_peripheral_nerve_conduction	Pain_insensitivity	Impaired_temperature_sensation	Aplasia_of_the_sweat_glands	Dry_skin	Atypical_scarring_of_skin	Specific_learning_disability	Recurrent_fever	Difficulty_walking	Painless_fractures_due_to_injury	Neuropathic_arthropathy	Trophic_limb_changes	Abnormality_of_humoral_immunity	Premature_loss_of_teeth	Nail-biting	Abscess	Abnormality_of_lower_limb_joint	Fasciitis	Lichenification	Short_attention_span	Hyperactivity	Bruising_susceptibility	Syncope	Growth_delay	Anemia	Unexplained_fevers	Dysphagia	Recurrent_aspiration_pneumonia	Abnormality_of_the_autonomic_nervous_system	Distal_sensory_impairment	Abnormality_of_the_ankles	Septic_arthritis	Abnormality_of_the_hip_bone	Sensory_impairment	Functional_motor_deficit	Orthostatic_hypotension_due_to_autonomic_dysfunction	Decreased_corneal_reflex	Alveolar_ridge_overgrowth	Avascular_necrosis	Feeding_difficulties	Tooth_abscess	Tongue_pain	Impulsivity
Hereditary_sensory_and_autonomic_neuropathy_type_5	Rare_neurologic_disease	Abnormality_of_the_dentition	Abnormality_of_the_gingiva	Malar_flattening	Deeply_set_eye	Anhidrosis	Poor_wound_healing	Intellectual_disability_mild	Painless_fractures_due_to_injury	Pain_insensitivity	Decreased_number_of_small_peripheral_myelinated_nerve_fibers	Impaired_temperature_sensation
Huntington_disease	Rare_neurologic_disease	Mental_deterioration	Hyperreflexia	Chorea	Abnormality_of_eye_movement	Agitation	Depressivity	Aggressive_behavior	Obsessive-compulsive_behavior	Disinhibition	Irritability	Hallucinations	Anxiety	Apathy	Delusions	Seizures	Gait_disturbance	Dystonia	Myoclonus	Weight_loss	Bradykinesia	Gait_imbalance	Clumsiness	Memory_impairment	Difficulty_walking	Hypokinesia	Generalized_muscle_weakness	Involuntary_movements	Abnormality_of_the_sense_of_smell	Poor_fine_motor_coordination	Speech_articulation_difficulties	Staring_gaze	Hostility	Bradyphrenia	Abnormal_libido	Excessive_daytime_somnolence	Cerebral_atrophy	Rigidity	Clonus	Mutism	Caudate_atrophy	Abnormality_of_the_cerebral_white_matter	Inability_to_walk	Polyphagia	Abnormality_of_cholesterol_metabolism	Babinski_sign	Impaired_visuospatial_constructive_cognition	Choking_episodes	Alcoholism
Huntington_disease-like_1	Rare_neurologic_disease	Chorea	Behavioral_abnormality	Depressivity	Dementia	Delusions	Dysarthria	Gait_disturbance	Gait_ataxia	Ventriculomegaly	Involuntary_movements	Cognitive_impairment	Mask-like_facies	Abnormality_of_eye_movement	Slow_saccadic_eye_movements	Abnormal_saccadic_eye_movements	Abnormality_of_ocular_smooth_pursuit	Nystagmus	Restlessness	Delayed_speech_and_language_development	Seizures	Cerebellar_atrophy	Generalized_hypotonia	Dysmetria	Slurred_speech	Weight_loss	Bradykinesia	Cerebral_cortical_atrophy	Abnormality_of_the_basal_ganglia	Gliosis	Incoordination	Clumsiness	EEG_abnormality	Memory_impairment	Frequent_falls	Hypokinesia	Abnormal_head_movements	Abnormal_posturing	Abnormality_of_the_shoulder	Hyperactive_deep_tendon_reflexes	Jerky_head_movements	Poor_fine_motor_coordination	Jerky_ocular_pursuit_movements	Abnormality_of_higher_mental_function	Simultanapraxia
Huntington_disease-like_2	Rare_neurologic_disease	Personality_changes	Abnormality_of_movement	Behavioral_abnormality	Dementia	Gait_disturbance	Parkinsonism	Dystonia	Hyperreflexia	Weight_loss	Abnormal_cerebral_morphology	Chorea	Cerebral_cortical_atrophy	Caudate_atrophy	Memory_impairment	Primitive_reflex	Functional_motor_deficit	Involuntary_movements	Abnormal_corpus_striatum_morphology
Huntington_disease-like_3	Rare_neurologic_disease	Urinary_incontinence	Behavioral_abnormality	Seizures	Spasticity	Dystonia	Flexion_contracture	Abnormality_of_extrapyramidal_motor_function	Chorea	Cerebral_cortical_atrophy	Broad-based_gait	Neurological_speech_impairment	Mutism	Caudate_atrophy	Psychomotor_deterioration	Abnormal_head_movements	Bowel_incontinence	Loss_of_facial_expression	Extrapyramidal_muscular_rigidity	Progressive_gait_ataxia	Abnormal_pyramidal_sign	Extrapyramidal_dyskinesia	Cognitive_impairment
Huntington_disease-like_syndrome_due_to_C9ORF72_expansions	Rare_neurologic_disease	Inappropriate_behavior	Ataxia	Rigidity	Chorea	Memory_impairment	Cognitive_impairment	Psychosis	Depressivity	Anxiety	Parkinsonism	Dystonia	Tremor	Upper_motor_neuron_dysfunction	Myoclonus
Hydroxykynureninuria	Rare_neurologic_disease	Encephalopathy	Abnormality_of_tryptophan_metabolism	Stereotypy	Dry_skin	Intellectual_disability	Global_developmental_delay	Hypertonia	Tachycardia	Metabolic_acidosis	Renal_tubular_acidosis	Headache	Hypotension	Breathing_dysregulation	Congenital_sensorineural_hearing_impairment	Stomatitis	Coma	Progressive_encephalopathy
Hyperkalemic_periodic_paralysis	Rare_neurologic_disease	Ophthalmoparesis	Hypertonia	Gait_disturbance	Reduced_tendon_reflexes	Flexion_contracture	Death_in_infancy	Congestive_heart_failure	Malignant_hyperthermia	Respiratory_insufficiency	Hyperkalemia	Fasciculations	Myotonia	Bowel_incontinence	Hypokalemia	Hyponatremia	Myopathy	Skeletal_muscle_atrophy	Elevated_serum_creatine_kinase	Myalgia	Paresthesia	EMG_abnormality	Skeletal_muscle_hypertrophy	Episodic_flaccid_weakness	Periodic_hyperkalemic_paralysis	Feeding_difficulties_in_infancy	Arrhythmia	Cerebral_palsy	Death_in_early_adulthood	Chest_pain
Hypokalemic_periodic_paralysis	Rare_neurologic_disease	Periodic_hypokalemic_paresis	Episodic_hypokalemia	EMG_abnormality	Paralysis	Episodic_flaccid_weakness	Abnormal_muscle_fiber_morphology	Mildly_elevated_creatine_kinase	Increased_intramyocellular_lipid_droplets	Exercise-induced_muscle_fatigue	Postprandial_hyperglycemia	Late-onset_proximal_muscle_weakness	Respiratory_paralysis	Adrenocortical_adenoma	Fatigable_weakness_of_respiratory_muscles	Myotonia	Impaired_myocardial_contractility
Hypomyelination_neuropathy-arthrogryposis_syndrome	Rare_neurologic_disease	Muscular_hypotonia	Reduced_tendon_reflexes	Limitation_of_joint_mobility	Respiratory_distress	EMG_abnormality
Hypomyelination-hypogonadotropic_hypogonadism-hypodontia_syndrome	Rare_neurologic_disease	Hypodontia	Hypergonadotropic_hypogonadism	Ataxia	CNS_hypomyelination
Hypotonia-speech_impairment-severe_cognitive_delay_syndrome	Rare_neurologic_disease	Strabismus	Esotropia	Delayed_speech_and_language_development	Global_developmental_delay	Motor_delay	Absent_speech	Infantile_muscular_hypotonia	Tapered_distal_phalanges_of_finger	Intellectual_disability_severe	Thin_upper_lip_vermilion	Microcephaly	Smooth_philtrum	Short_philtrum	Triangular_face	Micrognathia	Low-set_posteriorly_rotated_ears	Prominent_nasal_bridge	Wide_nasal_bridge	Anteverted_nares	Downslanted_palpebral_fissures	Arachnodactyly	Seizures	Neonatal_hypotonia	Plagiocephaly	Severe_failure_to_thrive	Talipes_equinovarus	Abnormal_facial_shape	Frontal_bossing	Constipation	EEG_abnormality	Scoliosis	Short_stature	Cachexia	Enlarged_naris	Tented_upper_lip_vermilion	Central_hypotonia	Feeding_difficulties	Dyskinesia	Hyperesthesia	Small_hand	Short_neck	Nystagmus	Intrauterine_growth_retardation	Hypoplasia_of_the_corpus_callosum	Sleep_disturbance	Spastic_tetraplegia	Obstructive_sleep_apnea	Elbow_flexion_contracture
Ichthyosis-hepatosplenomegaly-cerebellar_degeneration_syndrome	Rare_neurologic_disease	Dementia	Ataxia	Hyporeflexia	Gait_disturbance	Splenomegaly	Neurological_speech_impairment	Hepatomegaly	Ichthyosis
Idiopathic_camptocormia	Rare_neurologic_disease	Abnormality_of_the_nervous_system	Dystonia	Cerebral_atrophy	Abnormality_of_the_cerebral_white_matter	Osteoarthritis	EMG:_neuropathic_changes	EMG:_myopathic_abnormalities	Abnormality_of_the_intervertebral_disk	EMG:_impaired_neuromuscular_transmission	Abnormality_of_the_head	Parkinsonism	Elevated_serum_creatine_kinase	EMG:_chronic_denervation_signs	Proximal_spinal_muscular_atrophy	Amyotrophic_lateral_sclerosis	Abnormal_inflammatory_response	Abnormality_of_movement	Abnormality_of_the_basal_ganglia	Frontotemporal_dementia	Myotonia	Alzheimer_disease	Abnormality_of_the_immune_system	Syringomyelia	Abnormal_synaptic_transmission_at_the_neuromuscular_junction	Spinal_canal_stenosis	Mitochondrial_myopathy	Abnormality_of_the_pons	Myelitis	Fatty_replacement_of_skeletal_muscle	Abnormal_muscle_fiber_dysferlin	Fatigable_weakness_of_skeletal_muscles	Lewy_bodies	Myositis
Idiopathic_hypersomnia	Rare_neurologic_disease	Excessive_daytime_somnolence	Sleep_disturbance	Hypersomnia
Idiopathic_intracranial_hypertension	Rare_neurologic_disease	Headache	Increased_intracranial_pressure	Papilledema	Obesity	Allergy	Visual_loss	Photophobia	Blurred_vision	Diplopia	Vomiting	Nausea	Sleep_disturbance	Scintillating_scotoma	Abnormal_emotion/affect_behavior	Depressivity	Lethargy	Migraine	Vertigo	Back_pain	Pulsatile_tinnitus	Olfactory_auras
IgG4-related_pachymeningitis	Rare_neurologic_disease	Abnormality_of_the_cerebrospinal_fluid	Abnormal_dura_mater_morphology	Headache	Increased_CSF_protein	Lower_limb_muscle_weakness	Elevated_C-reactive_protein_level	Pain	Increased_circulating_IgG4_level	Nephritis	Sinusitis	Visual_loss	Abnormality_of_the_optic_nerve	Diplopia	Hallucinations	Seizures	Mental_deterioration	Confusion	Pancreatitis	Dysphagia	Abnormal_lung_morphology	Dyspnea	Spinal_cord_compression	Aphasia	Paraparesis	Lymphadenitis	Abnormality_of_the_cervical_spine	Low_back_pain	Sensory_impairment	Cranial_nerve_paralysis	Abnormal_spinal_dura_mater_morphology	Abnormal_temporal_bone_morphology	Abnormality_of_the_clivus	Parotitis	Neck_pain	Abnormality_of_the_brachial_nerve_plexus	Abnormality_of_cervical_plexus	Abnormal_skull_morphology	Eosinophilia	Complement_deficiency
Immune-mediated_necrotizing_myopathy	Rare_neurologic_disease	Fatiguable_weakness_of_proximal_limb_muscles	Dysphagia	Skeletal_muscle_atrophy	Myalgia	Proximal_muscle_weakness_in_lower_limbs	Myositis	Palpitations	Neoplasm	Axial_muscle_weakness	Scapular_winging	Interstitial_pulmonary_abnormality	Myocarditis	Chest_pain	Skin_rash	Congestive_heart_failure	Arthralgia	Raynaud_phenomenon	Myopathy	Elevated_serum_creatine_kinase	EMG:_myopathic_abnormalities	Muscle_fiber_necrosis	Autoimmune_antibody_positivity
Inclusion_body_myopathy_with_Paget_disease_of_bone_and_frontotemporal_dementia	Rare_neurologic_disease	Distal_muscle_weakness	Waddling_gait	Elevated_serum_creatine_kinase	Hyperlordosis	EMG:_myopathic_abnormalities	Increased_variability_in_muscle_fiber_diameter	Proximal_muscle_weakness	Rimmed_vacuoles	Ubiquitin-positive_cerebral_inclusion_bodies	Abnormality_of_the_vertebral_column	Frontotemporal_dementia	Osteolysis	Elevated_alkaline_phosphatase	Short_stature	Brain_atrophy	Hip_pain	Cataract	Intellectual_disability	Cranial_nerve_compression	Hepatic_steatosis	Congestive_heart_failure	Cardiomyopathy	Mutism	Fasciculations	Aphasia	Dyscalculia	Abnormal_motor_neuron_morphology	Language_impairment	Upper_motor_neuron_dysfunction	Abnormality_of_calvarial_morphology	Increased_susceptibility_to_fractures	Urinary_bladder_sphincter_dysfunction	Sensory_axonal_neuropathy	EMG:_chronic_denervation_signs	EMG:_neuropathic_changes	Generalized_amyotrophy	Weakness_of_muscles_of_respiration	Calvarial_hyperostosis	Motor_axonal_neuropathy	Amyotrophic_lateral_sclerosis	Abnormality_of_long_bone_morphology	Fatty_replacement_of_skeletal_muscle	Pathologic_fracture
Inclusion_body_myositis	Rare_neurologic_disease	Reduced_tendon_reflexes	Autoimmunity	Ragged-red_muscle_fibers	Skeletal_muscle_atrophy	Elevated_serum_creatine_kinase	Myalgia	EMG_abnormality	Proximal_muscle_weakness	Quadriceps_muscle_weakness	Rimmed_vacuoles	Abnormal_muscle_fiber_morphology	Feeding_difficulties_in_infancy	Inflammatory_myopathy
Infantile_choroidocerebral_calcification_syndrome	Rare_neurologic_disease	Strabismus	Seizures	Hyperreflexia	Cerebral_calcification	Intellectual_disability_severe
Infantile_convulsions_and_choreoathetosis	Rare_neurologic_disease	Normal_interictal_EEG	Seizures	Choreoathetosis	Dystonia	Chorea	Athetosis	Focal_impaired_awareness_seizure	Involuntary_movements	Paroxysmal_dyskinesia	Focal_seizures_afebril	Complex_febrile_seizure	Experiential_auras	Brain_imaging_abnormality
Infantile_dystonia-parkinsonism	Rare_neurologic_disease	Parkinsonism	Dystonia	Hypomimic_face	Irritability	Global_developmental_delay	Hypertonia	Absent_speech	Constipation	Gastroesophageal_reflux	Bradykinesia	Chorea	Orofacial_dyskinesia	Hypokinesia	Limb_hypertonia	Abnormality_of_carboxylic_acid_metabolism	Abnormal_pyramidal_sign	Muscular_hypotonia_of_the_trunk	Oculogyric_crisis	Feeding_difficulties	Cerebral_palsy
Infantile_hypotonia-oculomotor_anomalies-hyperkinetic_movements-developmental_delay_syndrome	Rare_neurologic_disease	Autistic_behavior	Motor_delay	Absent_speech	EEG_abnormality	Infantile_muscular_hypotonia	Severe_global_developmental_delay	Strabismus	Esotropia	Nystagmus	Stereotypy	Poor_eye_contact	Vomiting	Gastroesophageal_reflux	Sleep_disturbance	Hyperkinetic_movements	Repetitive_compulsive_behavior	Poor_visual_behavior_for_age	Thin_upper_lip_vermilion	Brachyturricephaly	Epicanthus	Smooth_philtrum	Widow's_peak	Hypermetropia	Self-mutilation	Ataxia	Choreoathetosis	Dystonia	Joint_laxity	Laryngomalacia	Atrial_septal_defect	Bilateral_talipes_equinovarus	Chorea	Poor_speech	Scoliosis	Central_apnea	Hyperventilation	Lumbar_hyperlordosis	Short_nose	2-3_toe_syndactyly	Prominent_nasal_tip	Progressive_flexion_contractures	Almond-shaped_palpebral_fissure	Pes_valgus	Equinus_calcaneus	Sleep_apnea	EEG_with_spike-wave_complexes	EEG_with_series_of_focal_spikes	EEG_with_focal_sharp_waves
Infantile_neuroaxonal_dystrophy	Rare_neurologic_disease	EMG:_chronic_denervation_signs	Peripheral_axonal_neuropathy	Sensorimotor_neuropathy	Abnormal_pyramidal_sign	Muscular_hypotonia_of_the_trunk	Peripheral_neuropathy	Iron_accumulation_in_brain	Iron_accumulation_in_globus_pallidus	Cerebellar_gliosis	Increased_lactate_dehydrogenase_activity	Strabismus	Blindness	Nystagmus	Behavioral_abnormality	Emotional_lability	Autistic_behavior	Short_attention_span	Delayed_speech_and_language_development	Hyperactivity	Spasticity	Dysarthria	Gait_disturbance	Dystonia	Flexion_contracture	Constipation	Drooling	Temperature_instability	Aspiration_pneumonia	Pendular_nystagmus	Abnormal_autonomic_nervous_system_physiology	Impulsivity	Seizures	Apneic_episodes_in_infancy	Downbeat_nystagmus	Upgaze_palsy	Choking_episodes	Vegetative_state	Cerebellar_atrophy	Psychomotor_deterioration	Developmental_regression	Optic_atrophy	Abnormality_of_visual_evoked_potentials	Ataxia	Mental_deterioration	Spastic_tetraparesis	Hyperreflexia	Progressive_spasticity	Unsteady_gait
Infantile_neuronal_ceroid_lipofuscinosis	Rare_neurologic_disease	Dementia	Motor_deterioration	Visual_loss	Clumsiness	Granular_osmiophilic_deposits_(GROD)_in_cells	Motor_regression	Delayed_speech_and_language_development	Ataxia	Dysmetria	Dysarthria	Dysphagia	Myoclonus	Chorea	Tremor	Dystonia	EEG_with_generalized_slow_activity_grade_4	Increased_neuronal_autofluorescent_lipopigment	Cerebral_cortical_atrophy	Brain_atrophy	Progressive_visual_field_defects	Blindness	Cognitive_impairment	Delayed_ability_to_sit	Unsteady_gait	Spasticity	Seizures	Myoclonic_spasms	Generalized-onset_seizure	Interictal_EEG_abnormality	Cerebellar_atrophy	Cerebral_atrophy	Undetectable_electroretinogram	Abnormal_amplitude_of_pattern_electroretinogram	Abnormal_enzyme/coenzyme_activity	Autistic_behavior	Developmental_regression	Poor_head_control	Poor_fine_motor_coordination
Infantile_spasms_syndrome	Rare_neurologic_disease	Myoclonus	Developmental_regression	Hypsarrhythmia	Infantile_spasms	Abnormality_of_the_nervous_system	Abnormality_of_skin_morphology
Infantile_spasms-broad_thumbs_syndrome	Rare_neurologic_disease	Abnormality_of_the_fontanelles_or_cranial_sutures	Hypertelorism	Micrognathia	Convex_nasal_ridge	Optic_disc_pallor	Seizures	Cerebral_cortical_atrophy	Aplasia/Hypoplasia_of_the_corpus_callosum	Vaginal_hernia	Microcephaly	Downslanted_palpebral_fissures	Cataract	Hypertrophic_cardiomyopathy	EEG_abnormality	Broad_thumb
Infantile-onset_ascending_hereditary_spastic_paralysis	Rare_neurologic_disease	Abnormality_of_eye_movement	Spasticity	Spastic_paraplegia	Dysarthria	Hyperreflexia	Pseudobulbar_behavioral_symptoms	Anarthria	Tetraplegia	Spastic_tetraplegia	Impaired_mastication	Abnormal_pyramidal_sign
Infantile-onset_autosomal_recessive_nonprogressive_cerebellar_ataxia	Rare_neurologic_disease	Progressive_cerebellar_ataxia	Delayed_speech_and_language_development	Spasticity	Dysarthria	Global_developmental_delay	Cerebellar_atrophy	Generalized_hypotonia	Dysmetria	Hyperreflexia	Pes_planus	Broad-based_gait	Clumsiness	Difficulty_walking	Babinski_sign	Short_stature	Cerebellar_vermis_atrophy	Progressive_gait_ataxia	Intention_tremor
Infantile-onset_axonal_motor_and_sensory_neuropathy-optic_atrophy-neurodegenerative_syndrome	Rare_neurologic_disease	Cryptorchidism	Glaucoma	Optic_atrophy	Irritability	Decreased_nerve_conduction_velocity	Global_developmental_delay	Dystonia	Absent_speech	Gastroesophageal_reflux	Cerebral_atrophy	Generalized_tonic-clonic_seizures	EEG_abnormality	Inability_to_walk	Skeletal_muscle_atrophy	Sensory_axonal_neuropathy	Functional_motor_deficit	Motor_axonal_neuropathy	Horizontal_supranuclear_gaze_palsy	Feeding_difficulties_in_infancy	Infantile_muscular_hypotonia	Severe_global_developmental_delay	Gastrostomy_tube_feeding_in_infancy	Abnormal_peripheral_action_potential_amplitude	Joint_contractures_involving_the_joints_of_the_feet	Dyskinesia	Premature_pubarche
Infantile-onset_generalized_dyskinesia_with_orofacial_involvement	Rare_neurologic_disease	Orofacial_dyskinesia	Dysarthria	Motor_delay	Chorea	Drooling	Unsteady_gait	Frequent_falls	Muscular_hypotonia_of_the_trunk	Nasogastric_tube_feeding_in_infancy	Feeding_difficulties	Tremor	Hemiballismus	Brain_atrophy
Infantile-onset_spinocerebellar_ataxia	Rare_neurologic_disease	Hearing_impairment	Ophthalmoplegia	Optic_atrophy	Ataxia	Reduced_tendon_reflexes	Abnormality_of_the_autonomic_nervous_system	Abnormality_of_movement
Inherited_Creutzfeldt-Jakob_disease	Rare_neurologic_disease	Short_attention_span	Irritability	Anxiety	Apathy	Personality_changes	Seizures	Confusion	Muscle_weakness	Myoclonus	Tremor	Slurred_speech	Gait_ataxia	Bradykinesia	Progressive_cerebellar_ataxia	Global_brain_atrophy	Clumsiness	Stroke-like_episode	Astrocytosis	Dysautonomia	Spastic_dysarthria	Neuronal_loss_in_central_nervous_system	Babinski_sign	Loss_of_facial_expression	Diffuse_spongiform_leukoencephalopathy	Central_nervous_system_degeneration	Progressive_forgetfulness	Progressive_extrapyramidal_muscular_rigidity	Focal_T2_hyperintense_basal_ganglia_lesion	Abnormal_pyramidal_sign	EEG_with_persistent_abnormal_rhythmic_activity	Spastic_hemiparesis	Akinetic_mutism	Poor_visual_behavior_for_age	Senile_plaques	Insomnia	Hypersomnia	Hallucinations	Delusions	Chorea	Increased_CSF_protein	Abnormal_pupillary_function	Vestibular_nystagmus	Amyloidosis_of_peripheral_nerves	Trigeminal_neuralgia	Abnormality_of_vision	Supranuclear_gaze_palsy	Nystagmus	Emotional_lability
Intellectual_disability_Birk-Barel_type	Rare_neurologic_disease	Open_mouth	Dolichocephaly	Broad_philtrum	Short_philtrum	Hypomimic_face	Narrow_forehead	Micrognathia	Protruding_ear	Narrow_nasal_bridge	Broad_nasal_tip	Hyperactivity	Sacral_dimple	Global_developmental_delay	Generalized_hypotonia	Neonatal_hypotonia	Dysphonia	Dysphagia	Highly_arched_eyebrow	High_narrow_palate	Tented_upper_lip_vermilion	Incisor_macrodontia	Feeding_difficulties	Thick_vermilion_border	Fatigable_weakness_of_skeletal_muscles	Fatiguable_weakness_of_proximal_limb_muscles	Nasogastric_tube_feeding	Areflexia	Tongue_fasciculations	Limited_elbow_flexion/extension	Congenital_finger_flexion_contractures	Motor_axonal_neuropathy	Spinal_muscular_atrophy	Contractures_involving_the_joints_of_the_feet
Intellectual_disability_Buenos-Aires_type	Rare_neurologic_disease	Hydronephrosis	High_palate	Microcephaly	Mandibular_prognathia	Hypertelorism	Sloping_forehead	Macrotia	Wide_nasal_bridge	Downslanted_palpebral_fissures	Blepharophimosis	Photophobia	Dental_malocclusion	Pectus_carinatum	Abnormal_fingernail_morphology	Intellectual_disability	Umbilical_hernia	Abnormal_cardiac_septum_morphology	Spastic_gait	Neurological_speech_impairment	Fine_hair	Abnormality_of_pelvic_girdle_bone_morphology	Abnormality_of_calvarial_morphology	Clinodactyly_of_the_5th_finger	Short_stature	Reduced_bone_mineral_density	Biparietal_narrowing	Abnormality_of_dental_morphology	Hyperconvex_thumb_nails	Cuboid-shaped_thoracolumbar_vertebral_bodies	Open_bite
Intellectual_disability_Wolff_type	Rare_neurologic_disease	Inguinal_hernia	Cryptorchidism	Hypospadias	Thick_lower_lip_vermilion	Oral_cleft	Microretrognathia	Hypertelorism	Sloping_forehead	Macrotia	Bulbous_nose	Wide_nasal_bridge	Strabismus	Upslanted_palpebral_fissure	Large_hands	Seizures	Limitation_of_joint_mobility	Abnormality_of_the_nail	Low_posterior_hairline	Abnormal_intestine_morphology	Scoliosis	Delayed_skeletal_maturation	Clinodactyly_of_the_5th_finger	Hypoplastic_superior_helix	Short_distal_phalanx_of_finger	Intellectual_disability_severe	Broad_thumb	Severe_global_developmental_delay	Non-midline_cleft_lip	Camptodactyly_of_finger
Intellectual_disability-cataracts-calcified_pinnae-myopathy_syndrome	Rare_neurologic_disease	Hypogonadism	Abnormal_palate_morphology	Hydrocephalus	Macrotia	Conductive_hearing_impairment	Downslanted_palpebral_fissures	Cataract	Synophrys	Pectus_excavatum	Gynecomastia	Narrow_chest	Intellectual_disability	Seizures	Gait_disturbance	Plagiocephaly	Flexion_contracture	Anonychia	Anemia	Developmental_regression	Scoliosis	Osteolysis	Kyphosis	Narrow_iliac_wings	Myopathy	Hip_contracture	Irregular_vertebral_endplates	Abnormal_form_of_the_vertebral_bodies	Short_stature	Calcification_of_the_auricular_cartilage	Posterior_scalloping_of_vertebral_bodies	Bilateral_cryptorchidism	Midface_retrusion	Bone_cyst
Intellectual_disability-epilepsy-extrapyramidal_syndrome	Rare_neurologic_disease	Poor_eye_contact	Intellectual_disability	Constipation	Sleep_disturbance	Severe_global_developmental_delay	Brain_imaging_abnormality	Microcephaly	Autism	Aggressive_behavior	Mood_swings	Gait_ataxia	Broad-based_gait	Developmental_regression	Recurrent_infections	Infantile_muscular_hypotonia	Abnormality_of_pain_sensation	Feeding_difficulties	Tip-toe_gait	Macrocephaly	Agitation	Autistic_behavior	Seizures	Absent_speech	Status_epilepticus	Gait_imbalance	Drooling	Clumsiness	Unsteady_gait	Waddling_gait	Involuntary_movements
Intellectual_disability-expressive_aphasia-facial_dysmorphism_syndrome	Rare_neurologic_disease	Delayed_speech_and_language_development	Motor_delay	Abnormal_facial_shape	Hyperactivity	Intellectual_disability_mild	Mutism	EEG_abnormality	Abnormal_social_behavior	Long_face	Low-set_ears	Cafe-au-lait_spot	Seizures	Intellectual_disability_profound	Intellectual_disability_moderate	Incomprehensible_speech	Intellectual_disability_severe
Intellectual_disability-hyperkinetic_movement-truncal_ataxia_syndrome	Rare_neurologic_disease	Cataract	Intellectual_disability	Global_developmental_delay	Chorea	Truncal_ataxia	Difficulty_walking	Hyperkinetic_movements	Scoliosis	Myopathy	Myalgia	Limb-girdle_muscular_dystrophy	Exercise-induced_muscle_fatigue	Progressive_proximal_muscle_weakness	Strabismus	Myopia	Seizures	Cerebral_atrophy	Restrictive_ventilatory_defect	Right_ventricular_dilatation	Infantile_muscular_hypotonia
Intellectual_disability-seizures-hypophosphatasia-ophthalmic-skeletal_anomalies_syndrome	Rare_neurologic_disease	Brachycephaly	Narrow_forehead	Long_philtrum	High_forehead	Strabismus	Nystagmus	Osteopenia	Muscular_hypotonia	Slender_long_bone	Depressed_nasal_bridge	Intellectual_disability_severe	Abnormality_of_skeletal_morphology	Cerebral_visual_impairment	Abnormality_of_the_urinary_system	Nephrocalcinosis	Hearing_impairment	Wide_nasal_bridge	Hypermetropia	Pectus_excavatum	Abnormal_heart_morphology	Generalized_tonic-clonic_seizures	Generalized_myoclonic_seizures	Hypercalciuria	Scoliosis	High_narrow_palate	Downturned_corners_of_mouth	Delayed_skeletal_maturation	Hypercalcemia	Low_alkaline_phosphatase	Congenital_megaureter	Upper_limb_undergrowth	Generalized_tonic_seizures	Abnormal_eye_physiology	Renal_cyst	Renal_dysplasia	Malar_flattening	Micrognathia	Low-set_ears	Astigmatism	Myopia	Upslanted_palpebral_fissure	Precocious_puberty	Hypoparathyroidism	Cerebellar_atrophy	Craniosynostosis	Joint_hypermobility	Obesity	Atrial_septal_defect
Intellectual_disability-severe_speech_delay-mild_dysmorphism_syndrome	Rare_neurologic_disease	Delayed_speech_and_language_development	Expressive_language_delay	Speech_articulation_difficulties	Prominent_forehead	Abnormality_of_the_genitourinary_system	Open_mouth	Mandibular_prognathia	Hypertelorism	Recurrent_otitis_media	Broad_nasal_tip	Abnormality_of_the_eye	Strabismus	Downslanted_palpebral_fissures	Ptosis	Abnormality_of_refraction	Behavioral_abnormality	Autistic_behavior	Short_attention_span	Anxiety	Single_transverse_palmar_crease	Spasticity	Motor_delay	Flexion_contracture	Failure_to_thrive	Abnormal_heart_morphology	Constipation	Frontal_upsweep_of_hair	Intellectual_disability_moderate	Downturned_corners_of_mouth	Recurrent_upper_respiratory_tract_infections	Short_nose	Prominent_nasolabial_fold	Oromotor_apraxia	Repetitive_compulsive_behavior	Intellectual_disability_severe	Chin_with_horizontal_crease	Feeding_difficulties	Thick_vermilion_border	Brain_imaging_abnormality	Abnormality_of_the_kidney	Macrocephaly	Retrognathia	Blepharophimosis	Abnormality_of_the_ear	Nystagmus	Diabetes_mellitus	Hypothyroidism	Prominent_fingertip_pads
Intellectual_disability-strabismus_syndrome	Rare_neurologic_disease	Strabismus	Intellectual_disability	Failure_to_thrive	Microcephaly	Epicanthus	Upslanted_palpebral_fissure	Delayed_speech_and_language_development	Spasticity	Global_developmental_delay	Short_stature	Depressed_nasal_bridge	Infantile_muscular_hypotonia	Prominent_forehead	Abnormality_of_brain_morphology	Cryptorchidism	Hypospadias	Micropenis	Wide_mouth	High_palate	Long_face	Hypertelorism	Facial_asymmetry	Sloping_forehead	Micrognathia	High_forehead	Hearing_impairment	Low-set_ears	Macrotia	Recurrent_otitis_media	Narrow_nasal_ridge	Prominent_nose	Short_neck	Telecanthus	Synophrys	Aggressive_behavior	Hyperactivity	Growth_hormone_deficiency	Hypohidrosis	Seizures	Plagiocephaly	Limitation_of_joint_mobility	Intrauterine_growth_retardation	Polyhydramnios	Atrial_septal_defect	Patent_ductus_arteriosus	Talipes_equinovarus	Achilles_tendon_contracture	Rocker_bottom_foot
Intermediate_nemaline_myopathy	Rare_neurologic_disease	Generalized_muscle_weakness	Nemaline_bodies	Severe_muscular_hypotonia	Abnormality_of_the_thorax	Hyporeflexia	Motor_delay	Flexion_contracture	Decreased_fetal_movement	Polyhydramnios	Dysphagia	Myopathic_facies	Difficulty_walking	Hypokinesia	Respiratory_failure	Skeletal_muscle_atrophy	EMG:_myopathic_abnormalities	Type_1_muscle_fiber_predominance	Multiple_prenatal_fractures	Facial_palsy	Hypertelorism	Long_philtrum	Low-set_ears	Ophthalmoplegia	Areflexia	Facial_diplegia	Premature_birth	High_narrow_palate	Arthrogryposis_multiplex_congenita	Cardiomyopathy
Isolated_asymptomatic_elevation_of_creatine_phosphokinase	Rare_neurologic_disease	Elevated_serum_creatine_kinase	Phenotypic_abnormality	Myopathy	Elevated_creatine_kinase_after_exercise
Isolated_focal_cortical_dysplasia	Rare_neurologic_disease	Abnormality_of_the_nervous_system	Seizures	Psychomotor_deterioration	Abnormal_neuron_morphology	Brain_imaging_abnormality	Behavioral_abnormality	Intellectual_disability_mild	Hemiparesis	Focal_impaired_awareness_seizure	Abnormal_cortical_gyration	Thick_cerebral_cortex	Focal-onset_seizure	Hyperintensity_of_cerebral_white_matter_on_MRI	Nocturnal_seizures	Cognitive_impairment	Generalized-onset_seizure	Generalized_tonic-clonic_seizures_with_focal_onset	Intellectual_disability_severe	Epileptic_spasms	Infantile_spasms	Neuronal/glioneuronal_neoplasm_of_the_central_nervous_system
Jeavons_syndrome	Rare_neurologic_disease	Absence_seizure	Eyelid_myoclonias	Generalized_myoclonic_seizures	EEG_with_photoparoxysmal_response	EEG_with_hyperventilation-induced_epileptiform_discharges	EEG_with_focal_epileptiform_discharges	EEG_with_focal_spikes	Visually-induced_seizure	Generalized_tonic-clonic_seizures_without_focal_onset	Limb_myoclonus	Insomnia	Anxiety	Intellectual_disability	Specific_learning_disability	Febrile_seizures	Abnormal_head_movements	Paroxysmal_involuntary_eye_movements	Atonic_seizure	EEG_with_spike-wave_complexes	Interictal_epileptiform_activity	EEG_with_generalized_polyspikes	Generalized_tonic_seizures	Continuous_spike_and_waves_during_slow_sleep
Juvenile_absence_epilepsy	Rare_neurologic_disease	Generalized_tonic-clonic_seizures	Generalized-onset_seizure	EEG_with_polyspike_wave_complexes	Abnormality_of_the_mouth	Abnormality_of_eye_movement	Absence_seizure	Febrile_seizures	Myoclonus
Juvenile_amyotrophic_lateral_sclerosis	Rare_neurologic_disease	Muscle_weakness	Lower_limb_spasticity	Skeletal_muscle_atrophy	Distal_amyotrophy	Upper_limb_spasticity	Amyotrophic_lateral_sclerosis	Spastic_diplegia	Hypertonia	Dystonia	Brisk_reflexes	Neurological_speech_impairment	Difficulty_walking	Distal_muscle_weakness	Bulbar_signs	Inability_to_walk	CNS_hypomyelination	Contractures_of_the_joints_of_the_lower_limbs	Delayed_ability_to_walk	Arm_dystonia	Muscle_fiber_atrophy	Contractures_of_the_joints_of_the_upper_limbs	Urinary_incontinence	Microcephaly	Supranuclear_gaze_palsy	Nystagmus	Behavioral_abnormality	Ataxia	Global_developmental_delay	Parkinsonism	Abnormal_cerebellum_morphology	Dysphagia	Chorea	Clonus	Opisthotonus	Anarthria	Axial_dystonia	Retrocollis	Head_titubation	Scoliosis	Proximal_muscle_weakness	Neck_flexor_weakness	Cachexia	Gastrostomy_tube_feeding_in_infancy	Oromandibular_dystonia	Toe_walking	Cognitive_impairment
Juvenile_Huntington_disease	Rare_neurologic_disease	Behavioral_abnormality	Depressivity	Dementia	Irritability	Hyperactivity	Seizures	Ataxia	Dystonia	Hyperreflexia	Weight_loss	Rigidity	Gait_ataxia	Bradykinesia	Chorea	Broad-based_gait	Abnormality_of_the_cerebral_white_matter	Abnormal_involuntary_eye_movements	Oral_motor_hypotonia	Neuronal_loss_in_basal_ganglia	Cerebellar_atrophy	Myoclonus	Progressive_cerebellar_ataxia	Ventriculomegaly	Cerebellar_vermis_atrophy
Juvenile_myoclonic_epilepsy	Rare_neurologic_disease	Generalized-onset_seizure	EEG_with_polyspike_wave_complexes	Morning_myoclonic_jerks	Abnormality_of_the_mouth	Abnormality_of_eye_movement	Absence_seizure	Febrile_seizures	Photosensitive_tonic-clonic_seizures	Aggressive_behavior	Status_epilepticus	Intellectual_disability
Juvenile_neuronal_ceroid_lipofuscinosis	Rare_neurologic_disease	Visual_loss	Clumsiness	Seizures	Developmental_regression	Apnea	Parkinsonism	Stereotypy	Retinal_degeneration	Abnormality_of_the_cerebral_white_matter	Abnormal_enzyme/coenzyme_activity	Blindness	Neurological_speech_impairment	Dementia	Poor_motor_coordination	Emotional_lability	Cognitive_impairment	Anxiety	Depressivity	Large_central_visual_field_defect	Poor_fine_motor_coordination	Progressive_language_deterioration	Loss_of_ability_to_walk	Brisk_reflexes	Optic_disc_pallor	Pigmentary_retinopathy	Generalized_tonic-clonic_seizures	Myoclonic_spasms	Dysphagia	Tube_feeding	Aspiration_pneumonia	Interictal_EEG_abnormality	Motor_deterioration	Abnormal_heart_morphology	Disturbance_of_facial_expression	Hyperhidrosis	Non-periodic_recurrent_fever	Tachycardia	Episodic_tachypnea	Cerebellar_atrophy	Cerebral_atrophy	Focal_T2_hyperintense_thalamic_lesion	Focal_T2_hyperintense_basal_ganglia_lesion	Sleep_disturbance
Juvenile_primary_lateral_sclerosis	Rare_neurologic_disease	Abnormality_of_the_bladder	Sensory_neuropathy	Spasticity	Spastic_tetraparesis	Muscle_weakness	Hyperreflexia	Dysphagia	Spastic_gait	Abnormal_upper_motor_neuron_morphology	Gait_imbalance	Pseudobulbar_behavioral_symptoms	Loss_of_speech	Spastic_dysarthria	Skeletal_muscle_atrophy	Abnormal_pyramidal_sign
KCNQ2-related_epileptic_encephalopathy	Rare_neurologic_disease	Intellectual_disability	Global_developmental_delay	Abnormality_of_the_cerebral_white_matter	Generalized_tonic_seizures	EEG_with_burst_suppression	Epileptic_encephalopathy	Pallor	Facial_erythema	Seizures	Muscular_hypotonia	Dystonia	Apnea	Cerebral_edema	Abnormal_globus_pallidus_morphology	Inability_to_walk	Poor_gross_motor_coordination	Epileptic_spasms	Feeding_difficulties	Profound_global_developmental_delay	Cerebral_atrophy	Hypoplasia_of_the_corpus_callosum	Hypsarrhythmia
Kennedy_disease	Rare_neurologic_disease	Testicular_atrophy	Decreased_fertility	Gynecomastia	Muscular_hypotonia	Dysarthria	Hyporeflexia	Gait_disturbance	Dysphonia	Abnormal_circulating_lipid_concentration	Skeletal_muscle_atrophy	Type_II_diabetes_mellitus	Abnormality_of_movement	Erectile_dysfunction
KLHL9-related_early-onset_distal_myopathy	Rare_neurologic_disease	Distal_sensory_impairment	EMG:_myopathic_abnormalities	Ankle_flexion_contracture	Weakness_of_the_intrinsic_hand_muscles	Progressive_distal_muscle_weakness	Abnormality_of_the_calf_musculature	Impaired_vibration_sensation_in_the_lower_limbs	Difficulty_walking	Steppage_gait	Absent_patellar_reflexes	Impaired_distal_tactile_sensation	Intrinsic_hand_muscle_atrophy	Amyotrophy_of_ankle_musculature	Abnormal_levels_of_creatine_kinase_in_blood	Absent_Achilles_reflex	Peripheral_axonal_neuropathy	Loss_of_ability_to_walk
Klippel-Trelaunay_syndrome	Rare_neurologic_disease	Tall_stature	Abnormality_of_the_menstrual_cycle	Microcephaly	Macrocephaly	Hematuria	Abnormal_skull_morphology	Edema	Hemangioma	Intellectual_disability	Ascites	Atrial_septal_defect	Congestive_heart_failure	Patent_ductus_arteriosus	Abnormal_tricuspid_valve_morphology	Hydrops_fetalis	Microcytic_anemia	Respiratory_insufficiency	Pulmonary_embolism	Gastrointestinal_hemorrhage	Hepatomegaly	Prolonged_bleeding_time	Abnormality_of_the_pulmonary_artery	Venous_thrombosis	Venous_insufficiency	Internal_hemorrhage	Abnormality_of_skeletal_morphology	Lower_limb_asymmetry	Upper_limb_asymmetry	Cellulitis	Hypercoagulability	Peripheral_arteriovenous_fistula
Kufor-Rakeb_syndrome	Rare_neurologic_disease	Slow_saccadic_eye_movements	Supranuclear_gaze_palsy	Dementia	Parkinsonism	Rigidity	Lower_limb_hyperreflexia	Babinski_sign	Abnormal_pyramidal_sign	Hyperreflexia_in_upper_limbs	Urinary_incontinence	Difficulty_in_tongue_movements	Hypomimic_face	Short_attention_span	Abnormality_of_finger	Lethargy	Confusion	Myoclonus	Cerebral_cortical_atrophy	Difficulty_walking	Visual_hallucinations	Anarthria	Leg_muscle_stiffness	Oculogyric_crisis	Abnormality_of_higher_mental_function	Fatigue	Dyskinesia	Vertical_supranuclear_gaze_palsy	Nystagmus	Blepharospasm	Eyelid_apraxia	Apathy	Dysarthria	Mental_deterioration	Hypertonia	Gait_disturbance	Abnormality_of_the_foot	Fever	Dysphagia	Bradykinesia	Upper_motor_neuron_dysfunction	Bowel_incontinence	Generalized_muscle_weakness	Hyperactive_patellar_reflex	Stooped_posture	Lingual_dystonia
Kyphoscoliosis-lateral_tongue_atrophy-hereditary_spastic_paraplegia_syndrome	Rare_neurologic_disease	Talipes_equinovarus	Lower_limb_spasticity	Delayed_gross_motor_development	Lower_limb_hyperreflexia	Kyphoscoliosis	Muscle_spasm	Difficulty_standing	Progressive_spastic_paraplegia	Lower_limb_amyotrophy	Proximal_muscle_weakness_in_upper_limbs	Difficulty_running	Upper_limb_amyotrophy	Tongue_atrophy	Pain	Toe_walking	Intellectual_disability	Dysphagia	Babinski_sign	Knee_flexion_contracture	Cerebellar_atrophy	Cerebral_atrophy	Abnormal_levels_of_creatine_kinase_in_blood
Lafora_disease	Rare_neurologic_disease	Lafora_bodies	Seizures	Emotional_lability	Depressivity	Dementia	Ataxia	Spasticity	Dysarthria	Mental_deterioration	Gait_disturbance	Confusion	Giant_somatosensory_evoked_potentials	Recurrent_aspiration_pneumonia	Generalized_myoclonic_seizures	Status_epilepticus	Headache	Visual_hallucinations	Hypsarrhythmia	Inability_to_walk	Erratic_myoclonus	Nasogastric_tube_feeding	Myoclonus	Hepatic_failure	Generalized_tonic-clonic_seizures	Absence_seizure	Sleep_disturbance	Focal_impaired_awareness_seizure	Atypical_absence_seizure	Generalized_tonic-clonic_seizures_with_focal_onset	Focal-onset_seizure	Severe_photosensitivity	Atonic_seizure	Brain_atrophy	Simple_partial_occipital_seizures	Vegetative_state
Laing_early-onset_distal_myopathy	Rare_neurologic_disease	Foot_dorsiflexor_weakness	Toe_extensor_amyotrophy	High_palate	Neck_muscle_weakness	Gait_disturbance	Abnormality_of_the_calf_musculature	Distal_muscle_weakness	Scoliosis	Progressive_muscle_weakness	Myalgia	Minicore_myopathy	Type_1_muscle_fiber_predominance	Talipes_cavus_equinovarus	Mildly_elevated_creatine_kinase	Abnormal_mitochondria_in_muscle_tissue	Weakness_of_orbicularis_oculi_muscle	Dilated_cardiomyopathy	EMG:_myopathic_abnormalities	Proximal_muscle_weakness_in_lower_limbs	Rimmed_vacuoles
Lambert-Eaton_myasthenic_syndrome	Rare_neurologic_disease	Xerostomia	Reduced_tendon_reflexes	Dysautonomia	EMG:_decremental_response_of_compound_muscle_action_potential_to_repetitive_nerve_stimulation	Progressive_proximal_muscle_weakness	EMG:_repetitive_nerve_stimulation_abnormality	Calcium_channel_antibody_positivity	Abnormality_of_the_orbital_region	Impotence	Constipation	Bulbar_signs	Small_cell_lung_carcinoma	Hypohidrosis	Keratoconjunctivitis_sicca	Orthostatic_hypotension_due_to_autonomic_dysfunction
Laminin_subunit_alpha_2-related_congenital_muscular_dystrophy	Rare_neurologic_disease	Muscular_hypotonia	Motor_delay	Muscle_weakness	Weak_cry	Abnormality_of_metabolism/homeostasis	Gastroesophageal_reflux	Hypokinesia	Inability_to_walk	Respiratory_failure	Muscular_dystrophy	Congenital_muscular_dystrophy	Increased_connective_tissue	Absent_muscle_fiber_merosin	Highly_elevated_creatine_kinase	Muscle_fiber_atrophy	Myositis	Macroglossia	Intellectual_disability	Seizures	Flexion_contracture	Cerebral_edema	Astrocytosis	Recurrent_lower_respiratory_tract_infections	Aspiration	EMG_abnormality	Impaired_mastication	Facial_palsy	Abnormality_of_the_temporomandibular_joint	Abnormal_brainstem_MRI_signal_intensity	Open_mouth	Abnormality_of_visual_evoked_potentials	Pachygyria	Reduced_tendon_reflexes	Neonatal_hypotonia	Lissencephaly	Cardiomyopathy	Dysphagia	Myopathic_facies	Absence_seizure	Scoliosis	Hypoventilation	Hyperlordosis	Decreased_body_weight	Intercostal_muscle_weakness	Pontocerebellar_atrophy	Sensorimotor_neuropathy	Focal-onset_seizure	Protruding_tongue
Landau-Kleffner_syndrome	Rare_neurologic_disease	Seizures	Loss_of_speech	Aphasia	Language_impairment	Speech_apraxia	Interictal_EEG_abnormality	Spoken_Word_Recognition_Deficit	Continuous_spike_and_waves_during_slow_sleep	Behavioral_abnormality	Autistic_behavior	Absence_seizure	Developmental_regression	Attention_deficit_hyperactivity_disorder	Social_and_occupational_deterioration	Speech_articulation_difficulties	Focal_motor_seizure	EEG_with_generalized_epileptiform_discharges	EEG_with_frontal_focal_spikes	EEG_with_temporal_focal_spikes	Generalized_tonic-clonic_seizures_without_focal_onset	Emotional_lability	Depressivity	Aggressive_behavior	Short_attention_span	Anxiety	Hyperactivity	Slurred_speech	Gait_ataxia	Generalized_tonic-clonic_seizures	Mutism	Memory_impairment	Frequent_falls	Sleep_disturbance	Focal_impaired_awareness_seizure	Steppage_gait	Difficulty_standing	Atypical_absence_seizure	Focal_myoclonic_seizures	Generalized_clonic_seizures	Nocturnal_seizures	Non-convulsive_status_epilepticus_without_coma	Impulsivity	Autoimmune_antibody_positivity	Epileptic_encephalopathy
Late_infantile_neuronal_ceroid_lipofuscinosis	Rare_neurologic_disease	Retinal_degeneration	Motor_deterioration	Neurological_speech_impairment	EEG_with_generalized_slow_activity_grade_4	Granular_osmiophilic_deposits_(GROD)_in_cells	Abnormal_enzyme/coenzyme_activity	Blindness	Mental_deterioration	Focal-onset_seizure	Myoclonic_seizure	Ataxia	Myopia	Astigmatism	Abnormal_amplitude_of_flash_visual_evoked_potentials	EEG_with_series_of_focal_spikes	Myoclonus	EEG_with_photoparoxysmal_response	Language_impairment	Functional_motor_deficit	Behavioral_abnormality	Dementia	Delayed_speech_and_language_development	Intracellular_accumulation_of_autofluorescent_lipopigment_storage_material	Focal_tonic_seizure	Atonic_seizure	Typical_absence_seizure	Generalized_tonic-clonic_seizures	Visual_loss	Gait_disturbance	Loss_of_speech	Hyperactivity	Aggressive_behavior	Low_frustration_tolerance	Stereotypy	Anxiety	Obsessive-compulsive_trait	Hallucinations	Autistic_behavior	Reduced_visual_acuity	Seizures	Generalized_myoclonic_seizures	Sleep_disturbance	Inability_to_walk	Spasticity	Difficulty_standing	EEG_with_generalized_slow_activity	Multifocal_epileptiform_discharges	EEG_with_spike-wave_complexes
Lennox-Gastaut_syndrome	Rare_neurologic_disease	Intellectual_disability	Encephalopathy	EEG_with_focal_sharp_slow_waves	Behavioral_abnormality	Aggressive_behavior	Autistic_behavior	Hyperactivity	Mental_deterioration	Myoclonus	Generalized_tonic-clonic_seizures	EEG_abnormality	Abnormality_of_brainstem_morphology	Falls	Atypical_absence_seizure	Generalized_tonic_seizures	Atonic_seizure	Personality_disorder	Generalized_myoclonic_seizures	Focal-onset_seizure
Leukoencephalopathy_with_bilateral_anterior_temporal_lobe_cysts	Rare_neurologic_disease	Intellectual_disability	Global_developmental_delay	Motor_delay	Lower_limb_spasticity	Leukoencephalopathy	Intracranial_cystic_lesion	Microcephaly	Sensorineural_hearing_impairment	Strabismus	Absent_speech	Clonus	Babinski_sign	Functional_motor_deficit	Infantile_axial_hypotonia
Leukoencephalopathy-spondyloepimetaphyseal_dysplasia_syndrome	Rare_neurologic_disease	Leukoencephalopathy	Metaphyseal_chondrodysplasia	Visual_impairment	Abnormality_of_the_optic_nerve	Intellectual_disability	Spastic_paraplegia	Gait_disturbance	Tremor	Hyperreflexia	Cerebral_atrophy	Morphological_abnormality_of_the_pyramidal_tract	Hypoplasia_of_the_corpus_callosum	Enlargement_of_the_wrists	Babinski_sign	Reduced_bone_mineral_density	Abnormal_brainstem_MRI_signal_intensity	Large_knee	Toe_walking	Abnormal_astrocyte_morphology	Anteverted_nares	Horizontal_nystagmus	Depressed_nasal_bridge	Midface_retrusion
Limbic_encephalitis_with_NMDA_receptor_antibodies	Rare_neurologic_disease	Behavioral_abnormality	Short_attention_span	Seizures	Confusion	Memory_impairment	CSF_pleocytosis	Anti-NMDA_receptor_antibody_positivity	CSF_anti-NMDA_receptor_antibody_positivity	Hallucinations	Anxiety	Delusions	Fever	Vomiting	Diarrhea	Headache	Involuntary_movements	EEG_with_temporal_sharp_slow_waves	Ovarian_teratoma	Abnormal_autonomic_nervous_system_physiology	Dyskinesia	Mania	Insomnia	Psychosis	Agitation	Depressivity	Stereotypy	Choreoathetosis	Orthostatic_hypotension	Dystonia	Myoclonus	Rigidity	Chorea	Status_epilepticus	Opisthotonus	Generalized-onset_seizure	Mutism	Orofacial_dyskinesia	Loss_of_speech	Language_impairment	Excessive_salivation	Focal-onset_seizure	No_social_interaction	Oculogyric_crisis	Orthostatic_tachycardia	Abnormal_sudomotor_regulation	Hypersexuality	Delirium	Neuroblastoma
Locked-in_syndrome	Rare_neurologic_disease	Hearing_impairment	Abnormality_of_the_eye	Abnormality_of_vision	Diplopia	Behavioral_abnormality	Spasticity	Hypertonia	Abnormality_of_the_voice	Respiratory_insufficiency	Recurrent_respiratory_infections	Tetraparesis	Anarthria	Tetraplegia	Excessive_salivation	Feeding_difficulties	Cerebral_palsy
Lower_motor_neuron_syndrome_with_late-adult_onset	Rare_neurologic_disease	Distal_lower_limb_muscle_weakness	Hyporeflexia	Areflexia	Gait_disturbance	Fasciculations	Elevated_serum_creatine_kinase	EMG:_neuropathic_changes	Cold-induced_muscle_cramps	Exercise-induced_muscle_cramps	Increased_intramuscular_fat	Proximal_muscle_weakness_in_lower_limbs	Gastrocnemius_myalgia	Tongue_fasciculations	Tremor	Dysphagia	Ragged-red_muscle_fibers	EMG:_myopathic_abnormalities	Rimmed_vacuoles	Impaired_distal_vibration_sensation	Intrinsic_hand_muscle_atrophy	Proximal_muscle_weakness_in_upper_limbs	Abnormal_sensory_nerve_conduction_velocity	Abnormality_of_the_respiratory_system	Bulbar_signs	Inability_to_walk	Upper_motor_neuron_dysfunction
Machado-Joseph_disease_type_1	Rare_neurologic_disease	Progressive_external_ophthalmoplegia	Dystonia	Abnormality_of_extrapyramidal_motor_function	Progressive_cerebellar_ataxia	Upper_motor_neuron_dysfunction	Abnormal_pyramidal_sign	Peripheral_neuropathy	Proptosis	Supranuclear_ophthalmoplegia	Gaze-evoked_nystagmus	Diplopia	Delayed_speech_and_language_development	Spasticity	Dysarthria	Cerebellar_atrophy	Hyperreflexia	Dilated_fourth_ventricle	Clumsiness	Spinocerebellar_tract_degeneration	Skeletal_muscle_atrophy	Babinski_sign	Facial-lingual_fasciculations	Progressive_gait_ataxia	Substantia_nigra_gliosis	Degeneration_of_the_striatum	Neurogenic_bladder	Vocal_cord_paralysis	Vestibular_dysfunction	Dysphagia	Memory_impairment	Sleep_disturbance	Muscle_spasm	Abnormality_of_temperature_regulation	Distal_lower_limb_amyotrophy
Machado-Joseph_disease_type_2	Rare_neurologic_disease	Progressive_external_ophthalmoplegia	Abnormality_of_extrapyramidal_motor_function	Progressive_cerebellar_ataxia	Proptosis	Supranuclear_ophthalmoplegia	Gaze-evoked_nystagmus	Diplopia	Delayed_speech_and_language_development	Spasticity	Dysarthria	Cerebellar_atrophy	Dystonia	Hyperreflexia	Dilated_fourth_ventricle	Clumsiness	Upper_motor_neuron_dysfunction	Spinocerebellar_tract_degeneration	Skeletal_muscle_atrophy	Babinski_sign	Facial-lingual_fasciculations	Progressive_gait_ataxia	Abnormal_pyramidal_sign	Peripheral_neuropathy	Substantia_nigra_gliosis	Degeneration_of_the_striatum	Neurogenic_bladder	Vocal_cord_paralysis	Vestibular_dysfunction	Dysphagia	Memory_impairment	Sleep_disturbance	Muscle_spasm	Abnormality_of_temperature_regulation	Distal_lower_limb_amyotrophy
Machado-Joseph_disease_type_3	Rare_neurologic_disease	Babinski_sign	Facial-lingual_fasciculations	Progressive_gait_ataxia	Abnormal_pyramidal_sign	Substantia_nigra_gliosis	Degeneration_of_the_striatum	Neurogenic_bladder	Vocal_cord_paralysis	Vestibular_dysfunction	Dysphagia	Memory_impairment	Sleep_disturbance	Muscle_spasm	Peripheral_axonal_neuropathy	Abnormality_of_temperature_regulation	Progressive_external_ophthalmoplegia	Abnormality_of_extrapyramidal_motor_function	Progressive_cerebellar_ataxia	Distal_lower_limb_amyotrophy	Proptosis	Supranuclear_ophthalmoplegia	Gaze-evoked_nystagmus	Diplopia	Delayed_speech_and_language_development	Spasticity	Dysarthria	Cerebellar_atrophy	Dystonia	Hyperreflexia	Dilated_fourth_ventricle	Clumsiness	Abnormal_lower_motor_neuron_morphology	Degeneration_of_anterior_horn_cells	Distal_muscle_weakness	Upper_motor_neuron_dysfunction	Spinocerebellar_tract_degeneration	Skeletal_muscle_atrophy	EMG_abnormality
Macrophagic_myofasciitis	Rare_neurologic_disease	Fever	Arthralgia	Generalized_muscle_weakness	Myalgia	EMG_abnormality	Fatigue
Madras_motor_neuron_disease	Rare_neurologic_disease	Sensorineural_hearing_impairment	Bulbar_palsy	Weak_voice	Distal_muscle_weakness	Babinski_sign	Distal_amyotrophy	Hyperactive_deep_tendon_reflexes	Limb_fasciculations	Tinnitus	Visual_impairment	Optic_atrophy	Reduced_tendon_reflexes	Abnormal_cerebellum_morphology	Dysphagia	Schizophrenia	Reduced_visual_acuity	Facial_palsy
Malignant_hyperthermia_of_anesthesia	Rare_neurologic_disease	Metabolic_acidosis	Fever	Malignant_hyperthermia	Tachypnea	Hyperphosphatemia	Muscle_stiffness	Supraventricular_tachycardia	Ventricular_tachycardia	Intermittent_painful_muscle_spasms	Hypercapnia	Cardiomyocyte_mitochondrial_proliferation	Abnormality_of_skeletal_muscles	High-output_congestive_heart_failure	Acute_kidney_injury	Hyperkalemia	Myoglobinuria	Abnormality_of_the_coagulation_cascade	Acute_hepatic_failure	Ventricular_extrasystoles	Elevated_creatine_kinase_after_exercise	Acute_rhabdomyolysis	Necrotizing_myopathy	Exercise-induced_rhabdomyolysis	Abnormality_of_masseter_muscle
Manganese_poisoning	Rare_neurologic_disease	Emotional_lability	Hypertonia	Gait_disturbance	Dystonia	Bradykinesia	Abnormality_of_extrapyramidal_motor_function	Postural_instability	Postural_tremor	Headache	Memory_impairment	Cogwheel_rigidity	Abnormal_globus_pallidus_morphology	Abnormality_of_mitochondrial_metabolism	Sleep-wake_cycle_disturbance	Increased_reactive_oxygen_species_production	Visual_impairment	Aggressive_behavior	Obsessive-compulsive_behavior	Delusions	Inappropriate_laughter	Impotence	Confusion	Akinesia	Decreased_female_libido	Decreased_male_libido	Depressivity	Irritability	Hallucinations	Hypersexuality	Impairment_in_personality_functioning
Marchiafava-Bignami_disease	Rare_neurologic_disease	Abnormal_corpus_callosum_morphology	Malnutrition	Alcoholism	Low_levels_of_vitamin_B1	Coma	Dysarthria	Gait_disturbance	Gait_ataxia	Headache	Memory_impairment	Limb_hypertonia	Loss_of_consciousness	CNS_demyelination	Cognitive_impairment	Abnormal_emotion/affect_behavior	Urinary_incontinence	Abnormality_of_vision	Ophthalmoplegia	Nystagmus	Diplopia	Behavioral_abnormality	Psychosis	Depressivity	Aggressive_behavior	Dementia	Apathy	Delusions	Seizures	Ataxia	Excessive_daytime_somnolence	Hemiparesis	Confusion	Vomiting	Rigidity	Abnormality_of_the_basal_ganglia	Apraxia	Tetraparesis	Mutism	Vertigo	Visual_hallucinations	Aphasia	Primitive_reflex	Increased_CSF_protein	Abnormal_pyramidal_sign	Dyslexia	Dysgraphia	Facial_palsy	Anomia
MELAS	Rare_neurologic_disease	Dementia	Seizures	Muscle_weakness	Migraine	Increased_serum_lactate	EEG_abnormality	Aphasia	Stroke-like_episode	Lactic_acidosis	Ragged-red_muscle_fibers	Abnormal_mitochondria_in_muscle_tissue	Aplasia/Hypoplasia_of_the_cerebral_white_matter	Widened_cerebral_subarachnoid_space	Sensorineural_hearing_impairment	Visual_loss	Psychosis	Depressivity	Short_attention_span	Anxiety	Diabetes_mellitus	Ataxia	Hemiparesis	Gait_disturbance	Encephalopathy	Specific_learning_disability	Myoclonus	Vomiting	Generalized_tonic-clonic_seizures	Basal_ganglia_calcification	Recurrent_paroxysmal_headache	Memory_impairment	Increased_CSF_lactate	Increased_CSF_protein	Myopathy	Short_stature	Fluctuations_in_consciousness	Focal-onset_seizure	Peripheral_neuropathy	Impaired_visuospatial_constructive_cognition	Proteinuria	Focal_segmental_glomerulosclerosis	Nephropathy	Proximal_tubulopathy	Pigmentary_retinopathy	Progressive_external_ophthalmoplegia	Optic_atrophy	Personality_changes	Hypertrichosis
MEND_syndrome	Rare_neurologic_disease	Elevated_8-dehydrocholesterol	Elevated_8(9)-cholestenol	Cryptorchidism	High_palate	Hydrocephalus	Wide_anterior_fontanel	Hypertelorism	Micrognathia	Low-set_ears	Abnormality_of_the_nasal_bridge	Prominent_nasal_bridge	Long_neck	Thickened_nuchal_skin_fold	Telecanthus	Cataract	Microphthalmia	Upslanted_palpebral_fissure	Sacral_dimple	Hand_polydactyly	Intellectual_disability	Seizures	Global_developmental_delay	Generalized_hypotonia	Dandy-Walker_malformation	Failure_to_thrive	Aortic_valve_stenosis	Overlapping_toe	Hypoplasia_of_the_corpus_callosum	Limb_hypertonia	Kyphosis	Short_stature	2-3_toe_syndactyly	Spotty_hypopigmentation	Abnormal_auditory_evoked_potentials	Ichthyosis	Asymmetry_of_the_mouth	Broad_hallux	Overlapping_fingers	Midface_retrusion	Abnormal_social_behavior	Long_fingers	Cleft_palate	Aggressive_behavior	Hyperactivity	Abnormal_heart_morphology
MERRF	Rare_neurologic_disease	Sensorineural_hearing_impairment	Optic_atrophy	Multiple_lipomas	Ataxia	Generalized_myoclonic_seizures	Myopathy	Ragged-red_muscle_fibers	EMG_abnormality	Short_stature	Abnormality_of_movement	Cognitive_impairment
Metachromatic_leukodystrophy	Rare_neurologic_disease	Bowel_incontinence	Limb_pain	Gastrostomy_tube_feeding_in_infancy	Feeding_difficulties	Pain	Addictive_behavior	Impaired_continence	Toe_walking	Schizophrenia	Abnormality_of_the_duodenum	Intussusception	Abnormality_of_the_stomach	Abnormal_gallbladder_morphology	Decerebrate_rigidity	Neoplasm_of_the_gallbladder	Periventricular_leukomalacia	Abnormal_enzyme/coenzyme_activity	Hearing_impairment	Visual_impairment	Abnormality_of_visual_evoked_potentials	Decreased_nerve_conduction_velocity	Seizures	Ataxia	Hyporeflexia	Gait_disturbance	Muscle_weakness	Progressive_spasticity	Frequent_falls	Developmental_regression	Increased_CSF_protein	Muscle_spasm	Infantile_muscular_hypotonia	Peripheral_neuropathy	Hyperintensity_of_cerebral_white_matter_on_MRI	Urinary_incontinence	Behavioral_abnormality	Psychosis	Emotional_lability	Dementia	Personality_changes	Dysarthria	Dystonia	Tremor	Incoordination	Hemobilia
MFF-related_encephalopathy_due_to_mitochondrial_and_peroxisomal_fission_defect	Rare_neurologic_disease	Visual_impairment	Optic_disc_pallor	External_ophthalmoplegia	Optic_atrophy	Abnormality_of_visual_evoked_potentials	Impaired_use_of_nonverbal_behaviors	Decreased_nerve_conduction_velocity	Seizures	Spasticity	Motor_delay	Cerebellar_atrophy	Muscle_weakness	Hyperreflexia	Dysphagia	EEG_abnormality	Developmental_regression	Hypsarrhythmia	Functional_motor_deficit	Postnatal_microcephaly	Infantile_axial_hypotonia	Feeding_difficulties	Abnormal_mitochondrial_shape	Abnormal_thalamic_MRI_signal_intensity	Profound_global_developmental_delay	Abnormal_basal_ganglia_MRI_signal_intensity	Sound_sensitivity	Nasogastric_tube_feeding	Growth_delay	Epileptic_spasms
Microcephalic_cortical_malformations-short_stature_due_to_RTTN_deficiency	Rare_neurologic_disease	Microcephaly	Abnormal_facial_shape	Sloping_forehead	Intrauterine_growth_retardation	Severe_failure_to_thrive	Ventriculomegaly	Polymicrogyria	Poor_speech	Multiple_joint_contractures	Severe_short_stature	Intellectual_disability_severe	Severe_global_developmental_delay	Cryptorchidism	Hypospadias	Unilateral_renal_agenesis	Pelvic_kidney	Narrow_mouth	Retrognathia	Microretrognathia	Abnormality_of_the_orbital_region	Smooth_philtrum	Low-set_posteriorly_rotated_ears	Prominent_nasal_bridge	Wide_nasal_bridge	Proptosis	Optic_disc_pallor	Upslanted_palpebral_fissure	Hypotelorism	Optic_nerve_hypoplasia	Stereotypy	Eczema	Seizures	Spasticity	Dysarthria	Cerebellar_atrophy	Agenesis_of_corpus_callosum	Hypertonia	Pachygyria	Cerebellar_hypoplasia	Lissencephaly	Craniosynostosis	Cerebral_atrophy	Hypoplasia_of_the_corpus_callosum	Duodenal_atresia	Sleep_disturbance	Hyperkinetic_movements	Abnormality_of_the_periventricular_white_matter	Cortical_dysplasia
Microcephaly-thin_corpus_callosum-intellectual_disability_syndrome	Rare_neurologic_disease	Intellectual_disability	Spasticity	Global_developmental_delay	Absent_speech	Hyperreflexia	Hypoplasia_of_the_corpus_callosum	Poor_speech	Babinski_sign	Postnatal_microcephaly	Abnormal_pyramidal_sign	Delayed_myelination	Hydrocephalus	Exotropia	Horizontal_nystagmus	Bicuspid_aortic_valve	Abnormality_of_the_foot	Cerebral_atrophy	Abnormality_of_retinal_pigmentation
Mild_Canavan_disease	Rare_neurologic_disease	Motor_delay	Specific_learning_disability	Poor_speech	Mild_global_developmental_delay	Abnormal_enzyme/coenzyme_activity	Macrocephaly	Rod-cone_dystrophy	Delayed_speech_and_language_development	Seizures	Muscular_hypotonia	Hyperreflexia	Poor_head_control	Upper_motor_neuron_dysfunction	Babinski_sign	Abnormal_basal_ganglia_MRI_signal_intensity	Mild_microcephaly
Mitochondrial_membrane_protein-associated_neurodegeneration	Rare_neurologic_disease	Behavioral_abnormality	Spasticity	Dysarthria	Mental_deterioration	Muscle_weakness	Rigidity	Postural_instability	Hand_tremor	Babinski_sign	Urinary_incontinence	Optic_atrophy	Gait_disturbance	Parkinsonism	Dystonia	Dysphagia	Bradykinesia	Spastic_paraparesis	Frequent_falls	Abnormal_globus_pallidus_morphology	Bowel_incontinence	Hyperactive_deep_tendon_reflexes	Motor_axonal_neuropathy	Abnormality_of_the_substantia_nigra	Abnormal_saccadic_eye_movements	Shuffling_gait	Respiratory_insufficiency
Miyoshi_myopathy	Rare_neurologic_disease	Proximal_amyotrophy	Distal_lower_limb_amyotrophy	Tibialis_atrophy	Decreased/absent_ankle_reflexes	Toe_walking	Difficulty_climbing_stairs	Exercise-induced_myalgia	Tibialis_muscle_weakness	Proximal_muscle_weakness_in_lower_limbs	Triceps_weakness	Respiratory_insufficiency_due_to_muscle_weakness	Loss_of_ability_to_walk	Quadriceps_muscle_weakness	Pelvic_girdle_muscle_weakness	Difficulty_standing	Difficulty_walking	Distal_upper_limb_amyotrophy	Intrinsic_hand_muscle_atrophy	Shoulder_girdle_muscle_weakness	Foot_dorsiflexor_weakness	Distal_lower_limb_muscle_weakness	Myalgia	Muscle_stiffness	Abnormality_of_the_cardiovascular_system	Calf_muscle_hypertrophy
Moderate_multiminicore_disease_with_hand_involvement	Rare_neurologic_disease	Distal_upper_limb_muscle_weakness	Difficulty_running	Facial_palsy	Hyporeflexia_of_upper_limbs	Type_1_muscle_fiber_predominance	Knee_dislocation	Recurrent_patellar_dislocation	Neonatal_hypotonia	Talipes_equinovarus	Delayed_gross_motor_development	Generalized_muscle_weakness	Axial_muscle_weakness	Joint_hyperflexibility	Intrinsic_hand_muscle_atrophy
Moebius_syndrome-axonal_neuropathy-hypogonadotropic_hypogonadism_syndrome	Rare_neurologic_disease	Hypogonadotrophic_hypogonadism	Movement_abnormality_of_the_tongue	Mask-like_facies	Strabismus	External_ophthalmoplegia	Abnormality_of_finger	Muscular_hypotonia	Bilateral_talipes_equinovarus	Intellectual_disability_moderate	Inability_to_walk	Peripheral_axonal_neuropathy	Demyelinating_peripheral_neuropathy	Facial_paralysis	Decreased_corneal_reflex	Abnormality_of_jaw_muscles
Monomelic_amyotrophy	Rare_neurologic_disease	Muscle_weakness	Tremor	Fasciculations	Degeneration_of_anterior_horn_cells	Abnormality_of_the_immune_system	Abnormality_of_the_upper_limb	Abnormality_of_peripheral_nerve_conduction	EMG_abnormality	Distal_upper_limb_amyotrophy	Abnormality_of_movement
Moyamoya_disease	Rare_neurologic_disease	Telangiectasia	Intellectual_disability	Seizures	Ventriculomegaly	Abnormality_of_the_cerebral_vasculature
Moynahan_syndrome	Rare_neurologic_disease	Hypogonadism	Microcephaly	Sensorineural_hearing_impairment	Hyperkeratosis	Intellectual_disability	Seizures	Alopecia	Short_stature	Cachexia	Sparse_hair
MT-ATP6-related_mitochondrial_spastic_paraplegia	Rare_neurologic_disease	Impaired_vibration_sensation_in_the_lower_limbs	Progressive_spastic_paraplegia	Lower_limb_pain	Hyperreflexia	Lower_limb_spasticity	Difficulty_walking	Peripheral_axonal_neuropathy	Distal_lower_limb_muscle_weakness	Diabetes_mellitus	Abnormal_cerebellum_morphology	Cardiomyopathy	Babinski_sign	Supraventricular_arrhythmia	Abnormal_pyramidal_sign	Leg_muscle_stiffness	Optic_atrophy	Increased_serum_lactate
Mucopolysaccharidosis_type_2_attenuated_form	Rare_neurologic_disease	Macrocephaly	Coarse_facial_features	Flexion_contracture	Limitation_of_joint_mobility	Growth_delay	Heparan_sulfate_excretion_in_urine	Short_stature	Dermatan_sulfate_excretion_in_urine	Abnormal_enzyme/coenzyme_activity	Abnormality_of_cardiovascular_system_morphology	Camptodactyly_of_finger	Inguinal_hernia	Macroglossia	Gingival_overgrowth	Full_cheeks	Prominent_supraorbital_ridges	Sensorineural_hearing_impairment	Wide_nasal_bridge	Wide_nose	Visual_impairment	Umbilical_hernia	Hoarse_voice	Abnormal_heart_valve_morphology	Recurrent_upper_respiratory_tract_infections	Abnormality_of_dental_morphology	Sleep_apnea	Heart_murmur	Enlarged_tonsils	Increased_size_of_nasopharyngeal_adenoids	Recurrent_ear_infections	Otosclerosis	Conductive_hearing_impairment	Retinopathy	Abnormal_foveal_morphology	Abnormal_uvea_morphology	Optic_atrophy	Decreased_light-_and_dark-adapted_electroretinogram_amplitude	Nyctalopia	Short_attention_span	Hypertension	Thickened_ribs	Papilledema	Abnormal_corpus_callosum_morphology	Arthritis	Hip_dysplasia	Hepatosplenomegaly	Abnormal_mitral_valve_morphology	Cardiomyopathy
Mucopolysaccharidosis_type_2_severe_form	Rare_neurologic_disease	Upper_airway_obstruction	Spinal_canal_stenosis	Abnormal_vertebral_morphology	Peripheral_arterial_stenosis	Diaphyseal_thickening	Impaired_mastication	Abnormality_of_retinal_pigmentation	Corneal_opacity	Peripheral_visual_field_loss	Localized_skin_lesion	Arrhythmia	Constrictive_median_neuropathy	Thick_vermilion_border	Temporomandibular_joint_ankylosis	Scleral_thickening	Macrocephaly	Coarse_facial_features	Abnormality_of_the_nervous_system	Muscle_weakness	Flexion_contracture	Limitation_of_joint_mobility	Growth_delay	Heparan_sulfate_excretion_in_urine	Short_stature	Dermatan_sulfate_excretion_in_urine	Abnormal_enzyme/coenzyme_activity	Abnormality_of_cardiovascular_system_morphology	Camptodactyly_of_finger	Inguinal_hernia	Macroglossia	Gingival_overgrowth	Full_cheeks	Prominent_supraorbital_ridges	Wide_nasal_bridge	Wide_nose	Visual_impairment	Behavioral_abnormality	Global_developmental_delay	Mental_deterioration	Umbilical_hernia	Hoarse_voice	Abnormal_heart_valve_morphology	Sleep_disturbance	Recurrent_upper_respiratory_tract_infections	Abnormality_of_dental_morphology	Sleep_apnea	Heart_murmur	Enlarged_tonsils
Multifocal_motor_neuropathy	Rare_neurologic_disease	Progressive_distal_muscle_weakness	Reduced_tendon_reflexes	Fasciculations	Increased_CSF_protein	Progressive_muscle_weakness	Muscle_spasm	Limb_muscle_weakness	Functional_motor_deficit	Abnormality_of_ganglioside_metabolism	Limited_wrist_extension	Weakness_of_long_finger_extensor_muscles	Motor_conduction_block
Multiminicore_myopathy	Rare_neurologic_disease	Myopathy	Congenital_muscular_dystrophy	Minicore_myopathy	Strabismus	Generalized_hypotonia	Joint_stiffness	Failure_to_thrive	Respiratory_insufficiency	Scoliosis	Respiratory_insufficiency_due_to_muscle_weakness	Spinal_rigidity	EMG_abnormality	Abnormal_muscle_fiber_morphology	Short_stature	Joint_hyperflexibility	Proximal_muscle_weakness_in_lower_limbs	Proximal_muscle_weakness_in_upper_limbs	External_ophthalmoplegia	Malignant_hyperthermia	Distal_muscle_weakness	Arthrogryposis_multiplex_congenita
Multiple_system_atrophy	Rare_neurologic_disease	Gaze-evoked_nystagmus	Dysarthria	Parkinsonism	Constipation	Rigidity	Gait_ataxia	Bradykinesia	Progressive_cerebellar_ataxia	Postural_instability	Postural_tremor	Orofacial_dyskinesia	Resting_tremor	Frequent_falls	Dysautonomia	Abnormal_rapid_eye_movement_sleep	Axial_dystonia	Orthostatic_hypotension_due_to_autonomic_dysfunction	Autonomic_bladder_dysfunction	Abnormal_pyramidal_sign	Autonomic_erectile_dysfunction	Stridor	Central_sleep_apnea	Abnormal_brain_FDG_positron_emission_tomography	Orthostatic_syncope	Female_anorgasmia	Raynaud_phenomenon	Camptocormia
Multiple_system_atrophy_cerebellar_type	Rare_neurologic_disease	Gaze-evoked_nystagmus	Depressivity	Anxiety	Dysarthria	Dysphonia	Constipation	Gait_ataxia	Neuromuscular_dysphagia	Limb_ataxia	Progressive_cerebellar_ataxia	Broad-based_gait	Postural_instability	Postural_tremor	Orofacial_dyskinesia	Frequent_falls	Dysautonomia	Abnormal_rapid_eye_movement_sleep	Axial_dystonia	Orthostatic_hypotension_due_to_autonomic_dysfunction	Autonomic_bladder_dysfunction	Abnormal_pyramidal_sign	Autonomic_erectile_dysfunction	Stridor	Central_sleep_apnea	Downbeat_nystagmus	Abnormal_brain_FDG_positron_emission_tomography	Orthostatic_syncope	Female_anorgasmia	Raynaud_phenomenon	Apathy	Parkinsonism	Rigidity	Bradykinesia	Resting_tremor	Camptocormia
Multiple_system_atrophy_parkinsonian_type	Rare_neurologic_disease	Depressivity	Anxiety	Apathy	Parkinsonism	Constipation	Rigidity	Bradykinesia	Postural_instability	Orofacial_dyskinesia	Resting_tremor	Frequent_falls	Dysautonomia	Abnormal_rapid_eye_movement_sleep	Axial_dystonia	Orthostatic_hypotension_due_to_autonomic_dysfunction	Autonomic_bladder_dysfunction	Abnormal_pyramidal_sign	Autonomic_erectile_dysfunction	Stridor	Central_sleep_apnea	Abnormal_brain_FDG_positron_emission_tomography	Orthostatic_syncope	Female_anorgasmia	Raynaud_phenomenon	Gaze-evoked_nystagmus	Dysarthria	Gait_ataxia	Progressive_cerebellar_ataxia	Postural_tremor	Camptocormia
Muscle-eye-brain_disease_with_bilateral_multicystic_leucodystrophy	Rare_neurologic_disease	Cerebellar_vermis_hypoplasia	Absent_speech	Hypoplasia_of_the_corpus_callosum	Ventriculomegaly	Polymicrogyria	Cerebellar_cyst	Abnormality_of_brainstem_morphology	Leukodystrophy	Poor_head_control	Elevated_serum_creatine_kinase	Abnormality_of_the_pons	Infantile_muscular_hypotonia	Intellectual_disability_severe	EEG_with_focal_spike_waves	Severe_global_developmental_delay	Delayed_ability_to_sit	Hypoglycosylation_of_alpha-dystroglycan	Agyria	Delayed_ability_to_walk	Cataract	Retinal_dystrophy	Buphthalmos	High_myopia
Muscular_atrophy-ataxia-retinitis_pigmentosa-diabetes_mellitus_syndrome	Rare_neurologic_disease	Ataxia	Myopathy	Type_II_diabetes_mellitus	Abnormality_of_retinal_pigmentation
Mutilating_hereditary_sensory_neuropathy_with_spastic_paraplegia	Rare_neurologic_disease	Spasticity	Spastic_paraplegia	Gait_disturbance	Hyperreflexia	Dysautonomia	Distal_sensory_loss_of_all_modalities	Impaired_pain_sensation	Peripheral_neuropathy	Skin_ulcer	Abnormality_of_the_spinal_cord	Clonus	Sensory_axonal_neuropathy	Decreased_motor_nerve_conduction_velocity	Babinski_sign	Distal_amyotrophy	Progressive_spastic_paraplegia	Acral_ulceration_and_osteomyelitis_leading_to_autoamputation_of_the_digits_(feet)	Foot_osteomyelitis
Myasthenia_gravis	Rare_neurologic_disease	Muscle_weakness	Ptosis	Ophthalmoparesis	Diplopia	Abnormality_of_the_thymus	Dysarthria	Bulbar_palsy	Dysphagia	Dyspnea	Single_fiber_EMG_abnormality	Acetylcholine_receptor_antibody_positivity	Muscle_specific_kinase_antibody_positivity	Myositis	Hearing_impairment	Hyperthyroidism	Hashimoto_thyroiditis	Rheumatoid_arthritis	Systemic_lupus_erythematosus	Glycosuria	Paresthesia	Primary_adrenal_insufficiency	Hyperacusis	Raynaud_phenomenon	Psychosis	Acrocyanosis	Seizures	Hemolytic_anemia	Hepatitis	Pure_red_cell_aplasia
MYH7-related_late-onset_scapuloperoneal_muscular_dystrophy	Rare_neurologic_disease	Hypertension	Elevated_serum_creatine_kinase	Shoulder_girdle_muscle_weakness	Increased_variability_in_muscle_fiber_diameter	Tibialis_muscle_weakness	Foot_dorsiflexor_weakness	Increased_endomysial_connective_tissue	Reduced_tendon_reflexes	Pes_cavus	Difficulty_walking	Steppage_gait	EMG:_myopathic_abnormalities	Centrally_nucleated_skeletal_muscle_fibers	Scapular_winging	Shoulder_girdle_muscle_atrophy	Decreased_Achilles_reflex	Upper_limb_amyotrophy	Decreased_patellar_reflex	Hand_muscle_weakness	Arrhythmia	Left_anterior_fascicular_block	Heart_murmur	Beevor's_sign	Triceps_weakness	Intellectual_disability	Gait_disturbance	Abnormality_of_the_foot_musculature	Abnormality_of_the_cardiovascular_system	Abnormal_cardiac_septum_morphology	Pes_planus	Myopathic_facies	Enlargement_of_the_ankles	Hyperlordosis	Muscle_spasm	Upper_limb_muscle_weakness	Muscle_fiber_splitting	Left_ventricular_dysfunction	Limited_neck_flexion	Limited_wrist_extension	Limited_shoulder_movement	Chronic_obstructive_pulmonary_disease	Limited_hip_movement	Proximal_lower_limb_amyotrophy	Distal_lower_limb_muscle_weakness	Limitation_of_movement_at_ankles	Facial_palsy
Myoclonic_epilepsy_of_infancy	Rare_neurologic_disease	Intellectual_disability_mild	EEG_with_irregular_generalized_spike_and_wave_complexes	Generalized_tonic-clonic_seizures	Generalized_myoclonic_seizures	Attention_deficit_hyperactivity_disorder	Aggressive_behavior	Irritability	Global_developmental_delay	Mental_deterioration	Myoclonus	Poor_motor_coordination	Developmental_regression	Poor_hand-eye_coordination	Leber_optic_atrophy	Dysarthria	Absence_seizure	Febrile_seizures	Language_impairment	Photosensitive_tonic-clonic_seizures	Delayed_fine_motor_development	Hemiplegia
Myoclonic-astatic_epilepsy	Rare_neurologic_disease	Myoclonic_atonic_seizures	EEG_with_focal_spike_waves	Hyperactivity	Intellectual_disability	Absence_seizure	Generalized_myoclonic_seizures	Lack_of_peer_relationships	EEG_with_polyspike_wave_complexes	Attention_deficit_hyperactivity_disorder	Atonic_seizure	Generalized_tonic-clonic_seizures_without_focal_onset	Autistic_behavior	Impaired_social_interactions	Ataxia	EEG_with_irregular_generalized_spike_and_wave_complexes	Tremor	EEG_with_generalized_slow_activity	Simple_febrile_seizures	Interictal_epileptiform_activity	Abnormal_emotion/affect_behavior	Brain_imaging_abnormality	Wide_mouth	Thick_lower_lip_vermilion	Thin_upper_lip_vermilion	Microcephaly	Broad_philtrum	Long_philtrum	Wide_nasal_bridge	Anteverted_nares	Microphthalmia	Delayed_speech_and_language_development	Syndactyly	Muscular_hypotonia	Global_developmental_delay	Abnormal_facial_shape	Frontal_balding	Unsteady_gait	Abnormal_pyramidal_sign	Focal-onset_seizure	Thick_nasal_alae	Prominent_forehead	Premature_skin_wrinkling	Epileptic_encephalopathy	Epileptic_spasms
Myoclonus-dystonia_syndrome	Rare_neurologic_disease	Dystonia	Myoclonus	Spinal_myoclonus	Limb_myoclonus	Torticollis	Depressivity	Obsessive-compulsive_behavior	Anxiety	Writer's_cramp	Personality_disorder	Panic_attack
Myopathy_and_diabetes_mellitus	Rare_neurologic_disease	Skeletal_myopathy	Proximal_amyotrophy	Type_I_diabetes_mellitus	Lower_limb_hyperreflexia	Inability_to_walk	Babinski_sign	Exercise_intolerance	Shoulder_girdle_muscle_weakness	Difficulty_climbing_stairs	Difficulty_running	Progressive_proximal_muscle_weakness	Hyporeflexia_of_upper_limbs	Dysarthria	Progressive_cerebellar_ataxia	Respiratory_distress	Intellectual_disability_moderate	Frequent_falls	Myalgia	Peripheral_axonal_neuropathy	Pelvic_girdle_muscle_weakness	Distal_lower_limb_amyotrophy	Sternocleidomastoid_amyotrophy	Weakness_of_orbicularis_oculi_muscle	Tip-toe_gait	Weakness_of_facial_musculature	Sensorineural_hearing_impairment	Dementia	Neonatal_hypotonia	Achilles_tendon_contracture	Impaired_vibratory_sensation	Delirium	Schizophrenia
Myotonia_fluctuans	Rare_neurologic_disease	Muscle_stiffness	EMG:_myotonic_discharges	Spasticity_of_facial_muscles	Exercise-induced_muscle_stiffness	Myotonia_of_the_lower_limb	Myotonia_of_the_upper_limb	Blurred_vision	Diplopia	Myalgia	Fatigue	Handgrip_myotonia	Myotonia_of_the_face	Strabismus	Gait_disturbance	Neonatal_hypotonia	Apnea	Proximal_muscle_weakness	Myotonia_with_warm-up_phenomenon	Stridor	Laryngospasm	Choking_episodes	Cold-sensitive_myotonia
Myotonia_permanens	Rare_neurologic_disease	Epicanthus	Ophthalmoparesis	Ophthalmoplegia	Intellectual_disability	Hypertonia	Gait_disturbance	Muscle_weakness	Limitation_of_joint_mobility	Abnormality_of_the_voice	Dysphagia	Dyspnea	Asthma	Myotonia	Hyperlordosis	Myalgia	Muscle_spasm	EMG_abnormality	Skeletal_muscle_hypertrophy	Generalized_muscle_hypertrophy	Short_stature	Chest_pain
Narcolepsy_type_1	Rare_neurologic_disease	Abnormality_of_the_eye	Abnormality_of_vision	Hallucinations	Syncope	Slurred_speech	Obesity	Excessive_daytime_sleepiness	Sleep_disturbance	Abnormal_rapid_eye_movement_sleep	Cataplexy	Transient_global_amnesia
Narcolepsy_type_2	Rare_neurologic_disease	Behavioral_abnormality	Hallucinations	Excessive_daytime_somnolence	Sleep_disturbance	Insomnia
NARP_syndrome	Rare_neurologic_disease	Hearing_impairment	Rod-cone_dystrophy	Optic_disc_pallor	Blindness	Nystagmus	Dementia	Irritability	Sensory_neuropathy	Constriction_of_peripheral_visual_field	Retinal_arteriolar_tortuosity	Seizures	Ataxia	Global_developmental_delay	Ventriculomegaly	Cerebral_cortical_atrophy	Headache	Muscle_spasm	Babinski_sign	Proximal_muscle_weakness	Myoclonic_spasms	Short_stature	Corticospinal_tract_atrophy	Progressive_gait_ataxia	Retinal_pigment_epithelial_mottling	Intellectual_disability_severe	Abnormal_basal_ganglia_MRI_signal_intensity	Abnormal_visual_field_test	Abnormal_mitochondria_in_muscle_tissue
Native_American_myopathy	Rare_neurologic_disease	Muscle_weakness	Myopathic_facies	Cryptorchidism	Cleft_palate	Muscular_hypotonia	Motor_delay	Bilateral_ptosis	Talipes_equinovarus	Gastroesophageal_reflux	Malignant_hyperthermia	Respiratory_insufficiency	Congenital_contracture	Arthrogryposis_multiplex_congenita	Skeletal_muscle_atrophy	Short_stature	Progressive_congenital_scoliosis	Abnormality_of_the_curvature_of_the_vertebral_column	Feeding_difficulties	Abnormality_of_skeletal_muscle_fiber_size	Bifid_uvula	High_palate	Micrognathia	Conductive_hearing_impairment	Downslanted_palpebral_fissures	Dysarthria	Reduced_tendon_reflexes	Downturned_corners_of_mouth	Submucous_cleft_soft_palate	Muscle_fiber_atrophy	Facial_hemangioma	Intellectual_disability_mild	Joint_laxity	Inability_to_walk	Camptodactyly
Neuhauser-Eichner-Opitz_syndrome	Rare_neurologic_disease	Ataxia	Spasticity	Hypertonia	Rigidity	Muscle_stiffness	Hyporeflexia	Areflexia	Joint_hyperflexibility	Abnormality_of_movement	Behavioral_abnormality	Muscular_hypotonia	Mutism	Dysphasia	Aphasia	Echolalia
Neuralgic_amyotrophy	Rare_neurologic_disease	Narrow_mouth	Cleft_palate	Round_face	Sprengel_anomaly	Acrocyanosis	Polyneuropathy	Muscle_weakness	Respiratory_insufficiency	Neurological_speech_impairment	Arthralgia	Sleep_disturbance	Paresthesia	EMG_abnormality	Scapular_winging	Short_stature	Peripheral_neuropathy
Neurodegeneration_due_to_3-hydroxyisobutyryl-CoA_hydrolase_deficiency	Rare_neurologic_disease	Muscular_hypotonia	Motor_delay	Dystonia	Vomiting	Progressive_neurologic_deterioration	Epicanthus	Strabismus	Nystagmus	Seizures	Hyperreflexia	Failure_to_thrive	Metabolic_acidosis	Truncal_ataxia	Ventriculomegaly	Increased_serum_lactate	Sleep_disturbance	Hypsarrhythmia	Abnormality_of_mitochondrial_metabolism	Abnormal_vertebral_morphology	Aplasia/Hypoplasia_of_the_corpus_callosum	Facial_shape_deformation	Feeding_difficulties	Infantile_spasms	Cryptorchidism	Irritability	Encephalopathy	Respiratory_insufficiency	Leukoencephalopathy	Small_basal_ganglia	Tetralogy_of_Fallot	Head_titubation
Neurodegeneration_with_brain_iron_accumulation	Rare_neurologic_disease	Retinopathy	Optic_atrophy	Spasticity	Dysarthria	Cerebellar_atrophy	Dystonia	Rigidity	Abnormality_of_extrapyramidal_motor_function	Chorea	Iron_accumulation_in_brain
Neuroectodermal_melanolysosomal_disease	Rare_neurologic_disease	Hypopigmentation_of_the_skin	Intellectual_disability	Seizures	Muscular_hypotonia	Global_developmental_delay	Specific_learning_disability	Premature_graying_of_hair	Hypopigmentation_of_hair	Abnormality_of_movement	Myopia	Tremor	Strabismus	Abnormality_of_the_optic_nerve	Nystagmus	Optic_atrophy	Ataxia	Spasticity	Hypertonia	Cerebellar_hypoplasia	Rigidity	Cerebral_cortical_atrophy	Recurrent_respiratory_infections	Abnormality_of_the_cerebellar_vermis	Muscle_stiffness	Generalized_hyperpigmentation	Macular_dystrophy	Aplasia/Hypoplasia_of_the_macula	Subcortical_cerebral_atrophy	Cerebral_cortical_hemiatrophy
Neuroferritinopathy	Rare_neurologic_disease	Dystonia	Abnormality_of_the_basal_ganglia	Decreased_serum_ferritin	Iron_accumulation_in_brain	Cognitive_impairment	Hypomimic_face	Emotional_lability	Dysarthria	Dysphonia	Dysphagia	Bradykinesia	Chorea	Orofacial_dyskinesia	Abnormal_caudate_nucleus_morphology	Difficulty_walking	Involuntary_movements	Focal_dystonia	Iron_accumulation_in_globus_pallidus	Iron_accumulation_in_substantia_nigra	T2_hypointense_thalamus	Abnormal_thalamic_MRI_signal_intensity	Leg_dystonia	Abnormal_putamen_morphology	Abnormality_of_the_dentate_nucleus	Blepharospasm	Parkinsonism	Brisk_reflexes	Weak_voice	Loss_of_voice	Caudate_atrophy	Writer's_cramp	Lower_limb_hyperreflexia	Hyperreflexia_in_upper_limbs	Impaired_smooth_pursuit	Palatal_myoclonus	Arm_dystonia	Psychosis	Frontal_lobe_dementia	Resting_tremor	Increased_CSF_protein	Babinski_sign	Subcortical_dementia	Upgaze_palsy
Neuroleptic_malignant_syndrome	Rare_neurologic_disease	Hyperhidrosis	Fever	Mutism	Reduced_consciousness/confusion	Extrapyramidal_muscular_rigidity	Abnormal_autonomic_nervous_system_physiology	Hypertension	Tremor	Tachycardia	Metabolic_acidosis	Leukocytosis	Dysphagia	Drooling	Elevated_serum_creatine_kinase	Muscle_spasm	Excessive_salivation	Fatigue	Urinary_incontinence	Proteinuria	Agitation	Anxiety	Coma	Encephalopathy	Thrombocytosis	Acute_kidney_injury	Dehydration	Vomiting	Nausea	Chorea	Hyperuricemia	Hyperkalemia	Pulmonary_embolism	Hypotension	Hypocalcemia	Hyponatremia	Hyperphosphatemia	Elevated_hepatic_transaminase	Myoglobinuria	Hypomagnesemia	Elevated_alkaline_phosphatase	Rhabdomyolysis	Hypernatremia	Oculogyric_crisis	Arrhythmia	Aspiration_pneumonia	Rigors	Increased_lactate_dehydrogenase_activity	Delirium
Neurological_conditions_associated_with_aminoacylase_1_deficiency	Rare_neurologic_disease	Muscular_hypotonia	Encephalopathy	Generalized_muscle_weakness	Seizures	Global_developmental_delay	Vomiting	Apnea	Syringomyelia	Aplasia/Hypoplasia_of_the_cerebellar_vermis	Aplasia/Hypoplasia_of_the_corpus_callosum	Hypertelorism	Sensorineural_hearing_impairment	Wide_nose
Neuromyelitis_optica_spectrum_disorder	Rare_neurologic_disease	Functional_abnormality_of_the_bladder	Visual_loss	Neuronal_loss_in_central_nervous_system	Sensory_impairment	Paraplegia	Peripheral_demyelination	Myelitis	Autoimmune_antibody_positivity	Optic_neuritis	Ocular_pain	Abnormality_of_brain_morphology	Nausea	Respiratory_failure	CSF_pleocytosis	Recurrent_singultus
Neuronal_intranuclear_inclusion_disease	Rare_neurologic_disease	Abnormality_of_the_pharynx	Ophthalmoplegia	Nystagmus	Optic_atrophy	Behavioral_abnormality	Dementia	Seizures	Ataxia	Dysarthria	Hypertonia	Hyperreflexia	Neurological_speech_impairment	EEG_abnormality	Scoliosis	Spina_bifida_occulta	Abnormal_form_of_the_vertebral_bodies	EMG_abnormality	Abnormality_of_movement
Neutral_lipid_storage_myopathy	Rare_neurologic_disease	Shoulder_girdle_muscle_weakness	Progressive_proximal_muscle_weakness	Increased_intramyocellular_lipid_droplets	Fatty_replacement_of_skeletal_muscle	Motor_delay	Generalized_hypotonia	Hepatic_steatosis	Cardiomyopathy	Hypertriglyceridemia	Difficulty_walking	Fasciculations	Elevated_hepatic_transaminase	Myopathy	Myalgia	Easy_fatigability	Gowers_sign	Pelvic_girdle_muscle_weakness	Very_long_chain_fatty_acid_accumulation	Difficulty_running	Increased_lactate_dehydrogenase_activity	Abnormal_levels_of_creatine_kinase_in_blood	Sensorineural_hearing_impairment	Neck_muscle_weakness	Diabetes_mellitus	Intellectual_disability_mild	Areflexia	Congestive_heart_failure	Hepatomegaly	Rimmed_vacuoles	Short_stature	Chronic_pancreatitis	Foot_dorsiflexor_weakness	Generalized_limb_muscle_atrophy	Progressive_distal_muscle_weakness	Hand_muscle_weakness	Cholecystitis	Pineal_cyst	Obesity	Ichthyosis
New-onset_refractory_status_epilepticus	Rare_neurologic_disease	Fever	Status_epilepticus	EEG_with_generalized_epileptiform_discharges	EEG_with_spike-wave_complexes	Brain_imaging_abnormality	CSF_pleocytosis	Increased_CSF_protein	Cognitive_impairment	Functional_motor_deficit	Vegetative_state	Autoimmunity	Encephalitis	Abnormal_serum_interleukin_level	Refractory_status_epilepticus	Seizure_precipitated_by_febrile_infection	Confusion	Fatigue	Headache	Behavioral_abnormality	Focal_aware_motor_seizure	Facial_tics	Focal_impaired_awareness_seizure	Abnormal_head_movements	Focal_autonomic_seizure	Generalized_tonic-clonic_seizures_with_focal_onset	EEG_with_generalized_slow_activity	EEG_with_temporal_epileptiform_discharges	Focal_T2_hyperintense_basal_ganglia_lesion	Cerebellar_edema	Global_brain_atrophy	Generalized_tonic-clonic_seizures	Myoclonic_seizure	Status_epilepticus_without_prominent_motor_symptoms	EEG_with_frontal_epileptiform_discharges	Multifocal_epileptiform_discharges	Interictal_EEG_abnormality	Abnormal_basal_ganglia_MRI_signal_intensity	Abnormal_thalamic_MRI_signal_intensity
Niemann-Pick_disease_type_B	Rare_neurologic_disease	Delayed_puberty	Osteopenia	Osteoporosis	Decreased_liver_function	Splenomegaly	Thrombocytopenia	Hypersplenism	Hypertriglyceridemia	Hepatomegaly	Delayed_skeletal_maturation	Hyperlipidemia	Abnormal_circulating_lipid_concentration	Increased_LDL_cholesterol_concentration	Decreased_HDL_cholesterol_concentration	Short_stature	Progressive_pulmonary_function_impairment	Interstitial_pulmonary_abnormality	Cherry_red_spot_of_the_macula	Abnormal_blood_gas_level	Abnormality_of_the_nervous_system	Delayed_gross_motor_development	Respiratory_failure_requiring_assisted_ventilation	Peripheral_neuropathy	Decreased_serum_insulin-like_growth_factor_1	Nystagmus	Behavioral_abnormality	Depressivity	Cholelithiasis	Intellectual_disability	Ataxia	Abnormal_cerebellum_morphology	Specific_learning_disability	Cirrhosis	Hepatic_failure	Abnormal_heart_valve_morphology	Coronary_artery_atherosclerosis	Abnormal_bleeding	Autoimmune_thrombocytopenia	Absence_seizure	Apraxia	Systemic_lupus_erythematosus	Pathologic_fracture	Neoplasm_of_the_liver	Acute_promyelocytic_leukemia	Attention_deficit_hyperactivity_disorder	Bipolar_affective_disorder
NKX6-2-related_autosomal_recessive_hypomyelinating_leukodystrophy	Rare_neurologic_disease	Hypometric_saccades	Nystagmus	Ataxia	Abnormal_pyramidal_sign	Dysarthria	Global_developmental_delay	Generalized_hypotonia	Dystonia	Hyperreflexia	Progressive_spasticity	Difficulty_walking	Leukodystrophy	Head_titubation	CNS_hypomyelination	Paroxysmal_involuntary_eye_movements	Hyperintensity_of_cerebral_white_matter_on_MRI	Strabismus	Hirsutism	Seizures	Cerebellar_atrophy	Cerebral_atrophy	Scoliosis	Intellectual_disability	Hypoplasia_of_the_corpus_callosum	Dysesthesia
Non-24-hour_sleep-wake_syndrome	Rare_neurologic_disease	Blindness	Depressivity	Excessive_daytime_somnolence	Excessive_daytime_sleepiness	Abnormal_pineal_melatonin_secretion	Asthenia
Non-progressive_cerebellar_ataxia_with_intellectual_disability	Rare_neurologic_disease	Intellectual_disability_mild	Global_developmental_delay	Thick_lower_lip_vermilion	Long_face	Pointed_chin	Long_philtrum	Bulbous_nose	Wide_nose	Anteverted_nares	Strabismus	Deeply_set_eye	Aggressive_behavior	Autistic_behavior	Delayed_speech_and_language_development	Ataxia	Dysarthria	Dysmetria	Neonatal_hypotonia	Cerebellar_hypoplasia	Constipation	Unsteady_gait	Memory_impairment	Nonprogressive_cerebellar_ataxia	Abnormal_cortical_gyration	Abnormal_social_behavior	Segmental_myoclonic_seizures	Narrow_mouth	Macrocephaly	Brisk_reflexes	Large_forehead	Intention_tremor	Cerebral_cortical_atrophy	Abnormal_pyramidal_sign	Mesiodens	Hypoplastic_hippocampus	Palpebral_edema	Short_ear	Nystagmus	Positive_Romberg_sign
Non-progressive_predominantly_posterior_cavitating_leukoencephalopathy_with_peripheral_neuropathy	Rare_neurologic_disease	Progressive_leukoencephalopathy	Progressive_peripheral_neuropathy	Proteinuria	Renal_tubular_dysfunction	Ptosis	Pigmentary_retinopathy	Optic_atrophy	Delayed_speech_and_language_development	Intellectual_disability	Seizures	Ataxia	Excessive_daytime_somnolence	Global_developmental_delay	Motor_delay	Gait_disturbance	Generalized_hypotonia	Decreased_liver_function	Failure_to_thrive	Hypertrophic_cardiomyopathy	Anemia	Renal_Fanconi_syndrome	Hepatomegaly	Developmental_regression	Increased_CSF_lactate	Respiratory_insufficiency_due_to_muscle_weakness	Exertional_dyspnea	Glycosuria	Hyperphosphaturia	Lactic_acidosis	Generalized_muscle_weakness	Aminoaciduria	Diffuse_hepatic_steatosis	Abnormal_pyramidal_sign	Bilateral_sensorineural_hearing_impairment	Fatigable_weakness_of_swallowing_muscles	Skeletal_muscle_steatosis	Spastic_tetraparesis	Vomiting
Non-specific_early-onset_epileptic_encephalopathy	Rare_neurologic_disease	Encephalopathy	Delayed_speech_and_language_development	Intellectual_disability	Seizures	Global_developmental_delay	Hyporeflexia	Generalized_hypotonia	Failure_to_thrive	Developmental_regression	EEG_with_multifocal_slow_activity	Abnormality_of_coordination	Microcephaly	High_forehead	Downslanted_palpebral_fissures	Ptosis	Nystagmus	Hypodontia	Behavioral_abnormality	Autism	Ataxia	Spasticity	Mental_deterioration	Abnormal_corpus_callosum_morphology	Reduced_tendon_reflexes	Myoclonus	Tremor	Decreased_fetal_movement	Gastroesophageal_reflux	Cerebral_atrophy	Rigidity	Unsteady_gait	Difficulty_walking	Poor_head_control	Hypsarrhythmia	Involuntary_movements	Short_stature	Attention_deficit_hyperactivity_disorder	Feeding_difficulties	Brain_atrophy	Abnormal_myelination	Dyskinesia	Impulsivity	Abnormality_of_vision	Retinal_degeneration	Optic_atrophy	Status_epilepticus	Limb_hypertonia	Abnormal_involuntary_eye_movements
Non-specific_syndromic_intellectual_disability	Rare_neurologic_disease	High_forehead	Hearing_impairment	Macrotia	Conductive_hearing_impairment	Wide_nasal_bridge	Astigmatism	Strabismus	Downslanted_palpebral_fissures	Visual_impairment	Ptosis	Blepharophimosis	Precocious_puberty	Cafe-au-lait_spot	Papilledema	Retinal_atrophy	Prominent_fingertip_pads	Seizures	Muscular_hypotonia	Abnormal_corpus_callosum_morphology	Joint_hypermobility	Hip_dysplasia	Disproportionate_tall_stature	Nasal_speech	Pes_cavus	Frontal_upsweep_of_hair	Sleep_disturbance	Aphasia	Highly_arched_eyebrow	Aortic_root_aneurysm	Scoliosis	Kyphosis	Decreased_body_weight	Relative_macrocephaly	Pulmonary_artery_dilatation	Depressed_nasal_bridge	Frontal_cortical_atrophy	Congenital_nystagmus	Attention_deficit_hyperactivity_disorder	Duane_anomaly	Broad_hallux	Short_hallux	Incisor_macrodontia	Speech_apraxia	Prominent_forehead	Broad_thumb	Severe_global_developmental_delay	Feeding_difficulties	Panic_attack
Null_syndrome	Rare_neurologic_disease	Abnormality_of_peripheral_nerve_conduction	CNS_hypomyelination	Demyelinating_peripheral_neuropathy	Peripheral_demyelination	Decreased_nerve_conduction_velocity	Ataxia	Difficulty_walking	Progressive_spastic_paraplegia	Optic_atrophy	Abnormal_cerebellum_morphology	Intellectual_disability_moderate	Progressive_spastic_quadriplegia	Inability_to_walk	Neurodevelopmental_delay	Nystagmus
O'Sullivan-McLeod_syndrome	Rare_neurologic_disease	EMG_abnormality	Upper_limb_muscle_weakness	Intrinsic_hand_muscle_atrophy	Hand_muscle_weakness	Tremor	Fasciculations	EMG:_chronic_denervation_signs	Atrophy_of_the_spinal_cord	Pain	Cold_paresis	Eosinophilia	Increased_antibody_level_in_blood	Sensory_impairment	Hyperintensity_of_MRI_T2_signal_of_the_spinal_cord
Ocular_anomalies-axonal_neuropathy-developmental_delay_syndrome	Rare_neurologic_disease	Intellectual_disability	Global_developmental_delay	Muscular_hypotonia_of_the_trunk	Spasticity	Spastic_gait	Increased_serum_lactate	Poor_speech	Peripheral_axonal_neuropathy	Lower_limb_amyotrophy	Cryptorchidism	Long_face	Mandibular_prognathia	Micrognathia	High_forehead	Deeply_set_eye	Cataract	Myopia	Esotropia	Upslanted_palpebral_fissure	Optic_nerve_hypoplasia	Nystagmus	Optic_atrophy	Pectus_carinatum	Delayed_puberty	Cerebellar_atrophy	Hip_dysplasia	Hypertrophic_cardiomyopathy	Gait_ataxia	Sleep_disturbance	Scoliosis	Short_nose	3-Methylglutaconic_aciduria	Positional_foot_deformity	Feeding_difficulties	Seizures	Corneal_opacity
Oculopharyngeal_muscular_dystrophy	Rare_neurologic_disease	Mask-like_facies	Ptosis	Abnormality_of_the_pharynx	Ophthalmoplegia	Myopathy	Ragged-red_muscle_fibers	Elevated_serum_creatine_kinase	Spondylolisthesis	Rimmed_vacuoles	Abnormal_muscle_fiber_morphology
Oculopharyngodistal_myopathy	Rare_neurologic_disease	Progressive_external_ophthalmoplegia	Weakness_of_facial_musculature	Progressive_ptosis	Ophthalmoparesis	Abnormality_of_facial_musculature	Nasal_dysarthic_speech	Oral-pharyngeal_dysphagia	Progressive_distal_muscle_weakness	Distal_lower_limb_amyotrophy	Distal_upper_limb_amyotrophy	Respiratory_insufficiency_due_to_muscle_weakness	Progressive_sensorineural_hearing_impairment	Progressive_proximal_muscle_weakness	Weight_loss	Myopathic_facies	High_narrow_palate	Difficulty_in_tongue_movements	Restrictive_ventilatory_defect	Recurrent_aspiration_pneumonia	Abnormal_morphology_of_musculature_of_pharynx	Vocal_cord_paresis	Bowing_of_the_vocal_cords	Foot_dorsiflexor_weakness	Difficulty_walking	Areflexia	Abnormality_of_masseter_muscle	Fatigable_weakness_of_bulbar_muscles	Tibialis_muscle_weakness	Distal_upper_limb_muscle_weakness	Distal_lower_limb_muscle_weakness	Loss_of_ability_to_walk	Paraplegia	Proximal_muscle_weakness_in_upper_limbs	Abnormality_of_orbicularis_oris_muscle	Impaired_oropharyngeal_swallow_response	High_palate
Opsoclonus-myoclonus_syndrome	Rare_neurologic_disease	Abnormal_saccadic_eye_movements	Ataxia	Myoclonus	Sleep_disturbance	Opsoclonus	Behavioral_abnormality	Irritability	Vertigo	Neoplasm	Neuroblastoma	Limb_myoclonus	Cognitive_impairment	Encephalopathy	Rigidity	Melanoma	Breast_carcinoma	Ovarian_teratoma	Autoimmune_antibody_positivity	Small_cell_lung_carcinoma	Chronic_infection	Neoplasm_of_the_lung
Oromandibular_dystonia	Rare_neurologic_disease	Abnormality_of_the_mandible	Depressivity	Dysphonia	Weight_loss	Dysphagia	Impaired_mastication	Abnormality_of_the_temporomandibular_joint	Pain	Abnormal_lip_morphology	Facial_grimacing	Abnormality_of_the_nose	Torticollis	Blepharospasm	Hyperkinetic_movements	Bruxism	Generalized_dystonia	Laryngeal_dystonia	Lingual_dystonia	Dysarthria	Respiratory_distress	Limb_dystonia
Overlap_myositis	Rare_neurologic_disease	Hypertension	Arthritis	Dysphagia	Autoimmunity	Abnormal_circulating_lipid_concentration	Elevated_serum_creatine_kinase	Antinuclear_antibody_positivity	Proximal_muscle_weakness	Proximal_muscle_weakness_in_upper_limbs	Sclerodactyly	Finger_swelling	Constitutional_symptom	Raynaud_phenomenon	Severe_infection	Perifascicular_muscle_fiber_atrophy	Abnormality_of_the_kidney	Diabetes_mellitus	Abnormal_heart_morphology	Thrombocytopenia	Leukopenia	Pulmonary_arterial_hypertension	Tetraparesis	Difficulty_walking	Systemic_lupus_erythematosus	Elevated_hepatic_transaminase	Abnormality_of_connective_tissue	Difficulty_climbing_stairs	Subluxation_of_the_small_joints_of_the_hand	Interstitial_pulmonary_abnormality	Distal_lower_limb_muscle_weakness	Limb_pain	Abnormality_of_skin_morphology	Scleroderma	Rheumatoid_arthritis
Pachygyria-intellectual_disability-epilepsy_syndrome	Rare_neurologic_disease	Seizures	Global_developmental_delay	Premature_birth	Intellectual_disability_severe
PANDAS	Rare_neurologic_disease	Tics	Emotional_lability	Depressivity	Irritability	Personality_changes	Chorea	Sleep_disturbance	Developmental_regression	Attention_deficit_hyperactivity_disorder	Obsessive-compulsive_trait	Oppositional_defiant_disorder	Impulsivity	Abnormal_fear/anxiety-related_behavior	Agoraphobia	Enuresis	Anorexia	Phonophobia	Clumsiness	Arthralgia	Recurrent_streptococcus_pneumoniae_infections	Claustrophobia	Separation_insecurity	Encopresis	Mania
Pantothenate_kinase-associated_neurodegeneration	Rare_neurologic_disease	Visual_impairment	Retinal_degeneration	Spasticity	Choreoathetosis	Gait_disturbance	Dystonia	Abnormality_of_extrapyramidal_motor_function	Eye_of_the_tiger_anomaly_of_globus_pallidus	Loss_of_ability_to_walk	Abnormality_of_eye_movement	Rod-cone_dystrophy	Pigmentary_retinopathy	Nyctalopia	Behavioral_abnormality	Osteopenia	Dysarthria	Mental_deterioration	Parkinsonism	Acanthocytosis	Rigidity	Limb_dystonia	Bulbar_signs	Peripheral_visual_field_loss	Abetalipoproteinemia	Limb_pain	Retinal_flecks	Craniofacial_dystonia	Iron_accumulation_in_globus_pallidus	Iron_accumulation_in_substantia_nigra	Leg_dystonia	Blindness	Impaired_convergence	Optic_atrophy	Emotional_lability	Depressivity	Obsessive-compulsive_behavior	Dementia	Visual_field_defect	Saccadic_smooth_pursuit	Intellectual_disability	Global_developmental_delay	Motor_delay	Hyperreflexia	Slurred_speech	Neurological_speech_impairment	Fractures_of_the_long_bones	Attention_deficit_hyperactivity_disorder	Pallidal_degeneration
Papilloma_of_choroid_plexus	Rare_neurologic_disease	Hydrocephalus	Visual_impairment	Seizures	Hypertonia	Neoplasm	Hemiplegia/hemiparesis	Abnormality_of_nervous_system_morphology	Cognitive_impairment	Choroid_plexus_papilloma
Paramyotonia_congenita_of_Von_Eulenburg	Rare_neurologic_disease	Neonatal_hypotonia	Dysphagia	Myotonia	Myalgia	Muscle_stiffness	Neonatal_inspiratory_stridor	Percussion_myotonia	Paradoxical_myotonia	Feeding_difficulties	Facial_muscle_hypertrophy	Handgrip_myotonia	Myotonia_of_the_face	Myotonia_of_the_jaw	Myotonia_of_the_upper_limb	Cold-sensitive_myotonia	Cold_paresis	EMG:_myopathic_abnormalities	Periodic_hypokalemic_paresis	Abnormality_of_potassium_homeostasis
Parkinsonian-pyramidal_syndrome	Rare_neurologic_disease	Parkinsonism	Abnormal_pyramidal_sign	Neurogenic_bladder	Hypomimic_face	Slow_saccadic_eye_movements	Spasticity	Dystonia	Myoclonus	Hyperreflexia	Talipes_equinovarus	Dysphagia	Rigidity	Bradykinesia	Intention_tremor	Postural_instability	Sleep_disturbance	Shuffling_gait	Visual_hallucinations	Dysautonomia	Babinski_sign	Substantia_nigra_gliosis	Monotonic_speech	Cognitive_impairment	Dementia	Lewy_bodies
Paroxysmal_dystonic_choreathetosis_with_episodic_ataxia_and_spasticity	Rare_neurologic_disease	Paroxysmal_dyskinesia	Diplopia	Intellectual_disability	Spastic_paraplegia	Dysarthria	Choreoathetosis	Dystonia	Hyperreflexia	Episodic_ataxia	Headache	Paresthesia	Abnormal_pyramidal_sign	Generalized_tonic-clonic_seizures
Paroxysmal_exertion-induced_dyskinesia	Rare_neurologic_disease	Choreoathetosis	Dystonia	Paroxysmal_dyskinesia	Intellectual_disability	Seizures	Torsion_dystonia	Absence_seizure	Paresthesia	Involuntary_movements	Hyperactive_deep_tendon_reflexes	Aggressive_behavior	Irritability	Ataxia	Specific_learning_disability	Chorea	Intellectual_disability_mild	Lower_limb_spasticity
Paroxysmal_extreme_pain_disorder	Rare_neurologic_disease	Seizures	Constipation
Paroxysmal_hemicrania	Rare_neurologic_disease	Migraine	Recurrent_paroxysmal_headache	Ptosis	Photophobia	Phonophobia	Epiphora	Rhinitis	Conjunctival_hyperemia	Flushing	Rhinorrhea	Miosis	Diabetes_mellitus	Hypertension	Nausea_and_vomiting	Olfactory_auras	Restless_legs	Stiff_neck	Neck_pain	Palpebral_edema	Cluster_headache	Trigeminal_neuralgia
Paroxysmal_kinesigenic_dyskinesia	Rare_neurologic_disease	Dystonia	Chorea	Athetosis	Involuntary_movements	Dyskinesia	Focal_sensory_seizure	Seizures	Migraine	Writer's_cramp
Paroxysmal_non-kinesigenic_dyskinesia	Rare_neurologic_disease	Dystonia	Paroxysmal_dyskinesia	Choreoathetosis	Chorea	Hyperkinetic_movements	Involuntary_movements	Trismus	Torticollis	Joint_stiffness	Rigidity	Dyspnea	Neurological_speech_impairment	Generalized_muscle_weakness	Staring_gaze	Dyskinesia
PEHO_syndrome	Rare_neurologic_disease	Abnormal_palate_morphology	Abnormality_of_upper_lip	Open_mouth	Gingival_overgrowth	Hydrocephalus	Microcephaly	Malar_flattening	Epicanthus	Full_cheeks	Macrotia	Anteverted_nares	Abnormality_of_eye_movement	Visual_loss	Optic_atrophy	Tapered_finger	Seizures	Global_developmental_delay	Cerebellar_atrophy	Hyperreflexia	Flexion_contracture	Limitation_of_joint_mobility	Ventriculomegaly	Cerebral_cortical_atrophy	Porencephaly	Recurrent_respiratory_infections	Drowsiness	EEG_abnormality	Hypsarrhythmia	Arthrogryposis_multiplex_congenita	Short_nose	Biparietal_narrowing	Severe_muscular_hypotonia	Atrophy/Degeneration_affecting_the_brainstem	External_ear_malformation	Pedal_edema	Intellectual_disability_severe	Midface_retrusion	Feeding_difficulties	Peripheral_edema	Infantile_spasms	Abnormality_of_movement	Palpebral_edema
Pelizaeus-Merzbacher_disease	Rare_neurologic_disease	Abnormality_of_the_urinary_system	Microcephaly	Hearing_impairment	Visual_impairment	Nystagmus	Optic_atrophy	Abnormality_of_visual_evoked_potentials	Behavioral_abnormality	Intellectual_disability	Seizures	Ataxia	Muscular_hypotonia	Spasticity	Choreoathetosis	Gait_disturbance	Dystonia	Joint_stiffness	Failure_to_thrive_in_infancy	Premature_birth	Respiratory_insufficiency	Cerebral_cortical_atrophy	Neurological_speech_impairment	Recurrent_respiratory_infections	Developmental_regression	Bowel_incontinence	Scoliosis	Kyphosis	Short_stature	Cachexia	Peripheral_neuropathy	Abnormality_of_movement	Arteriovenous_malformation
Pelizaeus-Merzbacher_disease_in_female_carriers	Rare_neurologic_disease	Nystagmus	Horizontal_nystagmus	Muscular_hypotonia	Neurogenic_bladder	Hypertelorism	Deeply_set_eye	Mental_deterioration	Abnormal_corpus_callosum_morphology	Gait_disturbance	Hyperreflexia	Growth_delay	Lower_limb_spasticity	Neurological_speech_impairment	Generalized-onset_seizure	Spastic_paraparesis	Difficulty_walking	Developmental_regression	Inability_to_walk	CNS_hypomyelination	Babinski_sign	Nevus_flammeus_of_the_forehead	Abnormality_of_the_lower_urinary_tract	Mild_global_developmental_delay	Moderate_global_developmental_delay	Midface_retrusion	Anomia	Hyperintensity_of_cerebral_white_matter_on_MRI	Decreased_vigilance	Hand_apraxia
Perineural_cyst	Rare_neurologic_disease	Tarlov_cyst	EMG_abnormality	Low_back_pain	Sensory_impairment	Abnormal_sacrum_morphology	Lower_limb_pain	Urinary_incontinence	Depressivity	Infertility	Urinary_bladder_sphincter_dysfunction	Distal_sensory_impairment	Spinal_rigidity	Paresthesia	Difficulty_standing	Functional_motor_deficit	Distal_lower_limb_muscle_weakness	Sciatica	Abnormal_large_intestine_physiology	Female_sexual_dysfunction	Dyspareunia	Vulvodynia	Neurogenic_claudication	Male_sexual_dysfunction	Recurrent_urinary_tract_infections	Impotence	Abdominal_pain	Headache	Difficulty_walking	Inability_to_walk	Bowel_incontinence	Muscle_spasm	Sacral_meningocele	Dissociated_sensory_loss	Retrograde_ejaculation	Foot_pain	Shoulder_pain	Hip_pain	Groin_pain	Abnormal_reflex	Abnormality_of_the_thoracic_spine	Chest_pain	Anal_pain
Perioral_myoclonia_with_absences	Rare_neurologic_disease	Generalized_tonic-clonic_seizures	EEG_with_spike-wave_complexes	Loss_of_speech	Reduced_consciousness/confusion	Eyelid_myoclonias	Chin_myoclonus	Intellectual_disability	Absence_seizure	Generalized_myoclonic_seizures	Falls
Peripheral_demyelinating_neuropathy-central_dysmyelinating_leukodystrophy-Waardenburg_syndrome-Hirschsprung_disease	Rare_neurologic_disease	Hypogonadism	Sensorineural_hearing_impairment	Prominent_nasal_bridge	Underdeveloped_nasal_alae	Wide_nasal_bridge	Telecanthus	Abnormal_eyebrow_morphology	Decreased_lacrimation	Nystagmus	Hypohidrosis	Hypopigmented_skin_patches	Heterochromia_iridis	Intellectual_disability	Seizures	Ataxia	Muscular_hypotonia	Spasticity	Global_developmental_delay	Splenomegaly	Constipation	Abdominal_pain	Premature_graying_of_hair	Hepatomegaly	Aganglionic_megacolon	Ileus	Arthrogryposis_multiplex_congenita	Microcolon	Hypopigmentation_of_hair	Abnormal_pyramidal_sign	Peripheral_neuropathy	Arrhythmia
Peripheral_motor_neuropathy-dysautonomia_syndrome	Rare_neurologic_disease	Hyperhidrosis	Acrocyanosis	Hyporeflexia	Joint_stiffness	Achalasia	Skeletal_muscle_atrophy	EMG_abnormality
Peripheral_neuropathy-myopathy-hoarseness-hearing_loss_syndrome	Rare_neurologic_disease	Decreased_nerve_conduction_velocity	Hyporeflexia	Hoarse_voice	Myopathy	EMG:_myopathic_abnormalities	Increased_variability_in_muscle_fiber_diameter	Lower_limb_muscle_weakness	Mildly_elevated_creatine_kinase	Bilateral_sensorineural_hearing_impairment	Progressive_distal_muscle_weakness	Peripheral_neuropathy	Structural_foot_deformity	Fatty_replacement_of_skeletal_muscle	Mitochondrial_swelling	Areflexia	Tremor	Proximal_muscle_weakness	Seizures	Arthritis	Vocal_cord_paralysis	Dysphagia
Permanent_neonatal_diabetes_mellitus-pancreatic_and_cerebellar_agenesis_syndrome	Rare_neurologic_disease	Triangular_face	Short_chin	Low-set_ears	Optic_nerve_hypoplasia	Neonatal_insulin-dependent_diabetes_mellitus	Cerebellar_hypoplasia	Aplasia/Hypoplasia_of_the_pancreas
Perry_syndrome	Rare_neurologic_disease	Depressivity	Dementia	Apathy	Personality_changes	Parkinsonism	Tremor	Weight_loss	Abnormality_of_extrapyramidal_motor_function	Sleep_disturbance	Hypotension	Central_hypoventilation
Persistent_idiopathic_facial_pain	Rare_neurologic_disease	Dull	Impaired_pain_sensation	Paresthesia	Acute_episodes_of_neuropathic_symptoms	Abnormality_of_the_face	Chronic_pain	Abnormality_of_the_nervous_system	Sensory_impairment	Burning_mouth	Anxiety	Depressivity	Abnormal_autonomic_nervous_system_physiology
Polyhydramnios-megalencephaly-symptomatic_epilepsy_syndrome	Rare_neurologic_disease	Macrocephaly	Seizures	Muscular_hypotonia	Global_developmental_delay	Megalencephaly	Polyhydramnios	Abnormal_facial_shape	Infantile_spasms	Ventriculomegaly	Cerebral_white_matter_hypoplasia	Periventricular_white_matter_hyperdensities	Nephrocalcinosis	Wide_mouth	Open_mouth	Narrow_face	Facial_hypotonia	High_forehead	Diabetes_insipidus	Absent_speech	Joint_laxity	Failure_to_thrive	Atrial_septal_defect	Congestive_heart_failure	Status_epilepticus	Drooling	Focal_impaired_awareness_seizure	Highly_arched_eyebrow	Decreased_muscle_mass	Severe_muscular_hypotonia	Tented_upper_lip_vermilion	Interictal_epileptiform_activity	Severe_global_developmental_delay	Feeding_difficulties	Abnormality_of_cardiovascular_system_morphology
Polyneuropathy_associated_with_IgM_monoclonal_gammapathy_with_anti-MAG	Rare_neurologic_disease	Impaired_vibration_sensation_in_the_lower_limbs	Progressive_peripheral_neuropathy	Demyelinating_sensory_neuropathy	Distal_sensory_impairment	Distal_amyotrophy	Monoclonal_immunoglobulin_M_proteinemia	Demyelinating_motor_neuropathy	EMG:_slow_motor_conduction	Sensorimotor_polyneuropathy_affecting_arms_more_than_legs
Polyneuropathy-intellectual_disability-acromicria-premature_menopause_syndrome	Rare_neurologic_disease	Furrowed_tongue	Decreased_nerve_conduction_velocity	Brachydactyly	Intellectual_disability	Gait_disturbance	Reduced_tendon_reflexes	Muscle_weakness	Truncal_obesity	Abnormality_of_pelvic_girdle_bone_morphology	Micromelia	EMG_abnormality	Short_stature	Ulnar_deviation_of_finger	Arrhythmia	Camptodactyly_of_finger	Precocious_menopause
Polyradiculoneuropathy_associated_with_IgG/IgA/IgM_monoclonal_gammopathy_without_known_antibodies	Rare_neurologic_disease	EMG:_neuropathic_changes	Symmetrical_progressive_peripheral_demyelination	Progressive_gait_ataxia	Demyelinating_sensory_neuropathy	Lower_limb_pain	Acroparesthesia	Demyelinating_motor_neuropathy	Lower_limb_muscle_weakness
POMGNT2-related_limb-girdle_muscular_dystrophy_R24	Rare_neurologic_disease	Intellectual_disability	Motor_delay	Poor_speech	Elevated_serum_creatine_kinase	Calf_muscle_hypertrophy	Proximal_muscle_weakness_in_lower_limbs	Myositis	Skeletal_muscle_atrophy	Difficulty_standing	Biliary_atresia	Attention_deficit_hyperactivity_disorder	Difficulty_running	Low_levels_of_vitamin_K
Porphyria	Rare_neurologic_disease	Behavioral_abnormality	Hallucinations	Hypertension	Pruritus	Cutaneous_photosensitivity	Abnormality_of_skin_pigmentation	Seizures	Muscle_weakness	Fever	Diarrhea	Nausea_and_vomiting	Constipation	Abdominal_pain	Anorexia	Sleep_disturbance	Paresthesia	Dupuytren_contracture	Abnormal_blistering_of_the_skin	Abnormal_circulating_porphyrin_concentration	Abnormal_urinary_color	Fatigue	Cerebral_palsy	Chest_pain
Postencephalitic_parkinsonism	Rare_neurologic_disease	Resting_tremor	Fever	Bradykinesia	Drowsiness	Cogwheel_rigidity	Poor_speech	Generalized_muscle_weakness	Babinski_sign	Involuntary_movements	Abnormal_pyramidal_sign	Oculogyric_crisis	Open_mouth	Abnormality_of_eye_movement	Slow_saccadic_eye_movements	Depressivity	Seizures	Dysarthria	Bilateral_ptosis	Vomiting	Dysphagia	Rigidity	Akinesia	Headache	Dysphasia	Diminished_movement	Functional_respiratory_abnormality	Kyphosis	Paresthesia	Fixed_facial_expression	Hyperactive_deep_tendon_reflexes	Abnormal_aggressive_impulsive_or_violent_behavior	Auditory_hallucinations	Abnormality_of_higher_mental_function	Cough	Upgaze_palsy	Abnormal_CSF_protein_level	Tremor_by_anatomical_site	Happy_demeanor	Abnormality_of_the_substantia_nigra	Camptocormia	CSF_lymphocytic_pleiocytosis
Posterior_column_ataxia-retinitis_pigmentosa_syndrome	Rare_neurologic_disease	Chronic_pain	Flexion_contracture_of_finger	Truncal_titubation	Abnormal_sensory_nerve_conduction_velocity	Bowel_incontinence	Cataract	Seizures	Areflexia	Ataxia	Impaired_vibration_sensation_in_the_lower_limbs	Impaired_proprioception	Rod-cone_dystrophy	Visual_loss	Pigmentary_retinopathy	Nyctalopia	Intellectual_disability	Gait_disturbance	Generalized_hypotonia	Gait_ataxia	Bone_spicule_pigmentation_of_the_retina	Axonal_degeneration	Abnormality_of_peripheral_nerves	Abnormality_of_the_spinal_cord	Delayed_gross_motor_development	Positive_Romberg_sign	Gastrointestinal_dysmotility	Scoliosis	Osteomyelitis	Kyphosis	Muscle_spasm	Camptodactyly
Posterior_cortical_atrophy	Rare_neurologic_disease	Oculomotor_apraxia	Anxiety	Ataxia	Confusion	Dyscalculia	Alexia	Agnosia	Finger_agnosia	Dysgraphia	Cerebral_visual_impairment	Abnormality_of_vision	Color_vision_defect	Photophobia	Dyslexia	Limb_apraxia	Memory_impairment	Visual_hallucinations	Language_impairment	Abnormal_rapid_eye_movement_sleep	Speech_apraxia	Inertia
Postnatal_microcephaly-infantile_hypotonia-spastic_diplegia-dysarthria-intellectual_disability_syndrome	Rare_neurologic_disease	Microcephaly	Low-set_ears	Hypotelorism	Delayed_speech_and_language_development	Intellectual_disability	Spastic_paraplegia	Dysarthria	Global_developmental_delay	Hyperreflexia	Failure_to_thrive	Broad-based_gait	Drooling	Difficulty_walking	Babinski_sign	Severe_muscular_hypotonia	Nasogastric_tube_feeding_in_infancy	Narrow_forehead	Seizures	Tremor	Hypoplasia_of_the_corpus_callosum	Febrile_seizures	Abnormal_CNS_myelination
Postpoliomyelitis_syndrome	Rare_neurologic_disease	Muscle_weakness	Pain	Arthralgia	Myalgia	Difficulty_climbing_stairs	Abnormality_of_higher_mental_function	Fatigue	Hypersomnia	Dysarthria	Abnormal_joint_morphology	Dysphagia	Respiratory_insufficiency	Sleep_disturbance	Fasciculations	Skeletal_muscle_atrophy	Muscle_spasm	Hypoventilation
Postsynaptic_congenital_myasthenic_syndromes	Rare_neurologic_disease	Muscle_weakness	High_palate	Abnormality_of_eye_movement	Ptosis	Ophthalmoparesis	Reduced_tendon_reflexes	Abnormality_of_the_musculature_of_the_upper_limbs	Skeletal_muscle_atrophy	Easy_fatigability	Decreased_miniature_endplate_potentials	EMG:_decremental_response_of_compound_muscle_action_potential_to_repetitive_nerve_stimulation	Decreased_size_of_nerve_terminals	EMG:_myopathic_abnormalities	Upper_limb_muscle_weakness	Shoulder_girdle_muscle_weakness	Neck_flexor_weakness	Type_1_muscle_fiber_predominance	Weakness_of_the_intrinsic_hand_muscles	Facial_palsy	Fatigable_weakness_of_neck_muscles	Abnormality_of_masticatory_muscle	Diplopia	Cyanosis	Restrictive_ventilatory_defect	Delayed_gross_motor_development	Drowsiness	Scoliosis	Reduced_vital_capacity	Exertional_dyspnea	Respiratory_failure	Thoracic_kyphoscoliosis	Weakness_of_long_finger_extensor_muscles	Hip_flexor_weakness	Orthopnea	Fatigable_weakness_of_respiratory_muscles	Triceps_weakness	Ankle_weakness
Posttransplant_acute_limbic_encephalitis	Rare_neurologic_disease	Seizures	Memory_impairment	Hyponatremia	Increased_CSF_protein	EEG_with_focal_epileptiform_discharges	CSF_polymorphonuclear_pleocytosis	Viremia	Hyperglycorrhachia	Sepsis	CSF_lymphocytic_pleiocytosis	Behavioral_abnormality	Psychosis	Depressivity	Anxiety	Ataxia	Confusion	Dystonia	Myoclonus	EEG_with_abnormally_slow_frequencies	Abnormal_autonomic_nervous_system_physiology	Abnormal_morphology_of_the_hippocampus	Abnormality_of_movement	Cognitive_impairment
Presynaptic_congenital_myasthenic_syndromes	Rare_neurologic_disease	Muscle_fiber_atrophy	High_palate	Long_face	Seizures	Motor_delay	Areflexia	Weak_cry	Dysphonia	Pes_cavus	Poor_head_control	Waddling_gait	Kyphoscoliosis	Spinal_rigidity	Limb-girdle_muscle_weakness	EMG:_myopathic_abnormalities	Distal_amyotrophy	Distal_lower_limb_muscle_weakness	Stridor	Central_hypotonia	Narrow_jaw	Toe_walking	Microretrognathia	Low-set_ears	Sensorineural_hearing_impairment	Esotropia	Nystagmus	Diplopia	Pectus_carinatum	Hyporeflexia	Congenital_hip_dislocation	Joint_laxity	Polyhydramnios	Gastroesophageal_reflux	EEG_with_polyspike_wave_complexes	Obstructive_sleep_apnea	Respiratory_arrest	Motor_polyneuropathy	Staring_gaze	Acetylcholine_receptor_antibody_positivity	Neck_muscle_weakness	Ptosis	Dysphagia	Poor_suck	Sudden_episodic_apnea	Fatigable_weakness	Proximal_muscle_weakness	Frontalis_muscle_weakness	Intermittent_episodes_of_respiratory_insufficiency_due_to_muscle_weakness
Primary_angiitis_of_the_central_nervous_system	Rare_neurologic_disease	Cerebral_vasculitis	Hemiparesis	Stroke	Nausea_and_vomiting	Headache	Transient_ischemic_attack	Aphasia	Paralysis	Multifocal_cerebral_white_matter_abnormalities	Recurrent_subcortical_infarcts	CSF_pleocytosis	Abnormal_CSF_protein_level	Cognitive_impairment	Blurred_vision	Diplopia	Seizures	Ataxia	Dysarthria	Fever	Intracranial_hemorrhage	Tetraparesis	Paraparesis	Reduced_visual_acuity	Transient_global_amnesia	Abnormal_visual_field_test	Pseudopapilledema	Parkinsonism	Vertigo	Constitutional_symptom	Amaurosis_fugax
Primary_basilar_invagination	Rare_neurologic_disease	Short_neck	Abnormality_of_eye_movement	Abnormality_of_the_pharynx	Abnormality_of_the_voice	Platybasia	Abnormality_of_the_cervical_spine	Abnormal_vertebral_morphology	Basilar_impression
Primary_dystonia_DYT13_type	Rare_neurologic_disease	Focal_dystonia	Hoarse_voice	Generalized_dystonia	Torticollis	Stereotypy	Torsion_dystonia	Postural_instability	Involuntary_movements	Dystonia	Limb_dystonia	Jerky_head_movements	Craniofacial_dystonia	Postural_tremor	Action_tremor
Primary_dystonia_DYT17_type	Rare_neurologic_disease	Dysarthria	Dysphonia	Generalized_dystonia	Torticollis	Craniofacial_dystonia	Parkinsonism	Cerebral_cortical_atrophy
Primary_dystonia_DYT2_type	Rare_neurologic_disease	Torsion_dystonia	Torticollis	Blepharospasm	Dysarthria	Tremor	Difficulty_walking	Limb_dystonia	Involuntary_movements	Feeding_difficulties	Generalized_dystonia
Primary_dystonia_DYT21_type	Rare_neurologic_disease	Dystonia	Torticollis	Blepharospasm	Paroxysmal_dystonia	Focal_dystonia	Generalized_dystonia	Limb_dystonia	Axial_dystonia	Laryngeal_dystonia
Primary_dystonia_DYT27_type	Rare_neurologic_disease	Oromandibular_dystonia	Laryngeal_dystonia	Action_tremor	Writer's_cramp	Limb_dystonia	Axial_dystonia	Focal_dystonia	Upper_limb_postural_tremor
Primary_dystonia_DYT4_type	Rare_neurologic_disease	Blepharospasm	Dementia	Dysphagia	Dysphonia	Generalized_dystonia	Laryngeal_dystonia	Movement_abnormality_of_the_tongue	Open_mouth	Torticollis	Gait_disturbance	Eunuchoid_habitus	Sunken_cheeks	Dysdiadochokinesis	Respiratory_distress	Kyphoscoliosis	Involuntary_movements	Upper_limb_postural_tremor
Primary_dystonia_DYT6_type	Rare_neurologic_disease	Dystonia	Generalized_dystonia	Dysarthria	Torticollis	Blepharospasm	Laryngeal_dystonia	Craniofacial_dystonia	Lingual_dystonia	Limb_dystonia
Primary_erythromelalgia	Rare_neurologic_disease	Peripheral_neuropathy	Erythema	Pruritus	Abnormality_of_thrombocytes	Leukemia	Hypothermia	Recurrent_respiratory_infections	Vasculitis
Primary_hyperaldosteronism-seizures-neurological_abnormalities_syndrome	Rare_neurologic_disease	Hypertension	Hyperaldosteronism	Abnormal_circulating_renin	Seizures	Global_developmental_delay	Ventricular_hypertrophy	Hypokalemia	Cerebral_palsy	Spastic_paraplegia	Polydipsia	Generalized_tonic-clonic_seizures	Pulmonary_arterial_hypertension	Athetosis	Focal_impaired_awareness_seizure	Intellectual_disability_severe	Focal_myoclonic_seizures	Caesarian_section	Second_degree_atrioventricular_block	EMG:_impaired_neuromuscular_transmission	Cerebral_visual_impairment	Metabolic_alkalosis	Tinnitus	Epistaxis	Nephrolithiasis	Ventricular_septal_defect	Nausea	Intracranial_hemorrhage	Headache	Adrenal_hyperplasia	Dexamethasone-suppresible_primary_hyperaldosteronism
Primary_lateral_sclerosis	Rare_neurologic_disease	Spasticity	Abnormal_upper_motor_neuron_morphology	Upper_motor_neuron_dysfunction	Babinski_sign	Generalized_hyperreflexia	Dysphagia	Spastic_gait	Pseudobulbar_signs	Loss_of_speech	Spastic_dysarthria	EMG:_chronic_denervation_signs	Progressive_spastic_paraparesis	Weakness_due_to_upper_motor_neuron_dysfunction	Atrophy_of_the_spinal_cord	Motor_axonal_neuropathy	Cervical_spinal_cord_atrophy	Abnormal_lower_motor_neuron_morphology	Sensory_impairment
Primary_microcephaly-mild_intellectual_disability-young-onset_diabetes_syndrome	Rare_neurologic_disease	Microcephaly	Diabetes_mellitus	Intellectual_disability	Small_for_gestational_age	Proportionate_short_stature	Congenital_microcephaly	Delayed_puberty	Seizures	Global_developmental_delay	Intrauterine_growth_retardation	Hypoglycemia	Abnormal_facial_shape	Poor_speech	Decreased_body_weight	Narrow_mouth	Thin_upper_lip_vermilion	Small_face	Narrow_face	Epicanthus	Full_cheeks	Low_anterior_hairline	Round_face	Short_philtrum	Narrow_forehead	Long_philtrum	Micrognathia	Macrotia	Sensorineural_hearing_impairment	Wide_nose	Anteverted_nares	Short_neck	Downslanted_palpebral_fissures	Blue_sclerae	Hypotelorism	Synophrys	Oligodontia	Hypoplasia_of_teeth	Pectus_excavatum	Hypothyroidism	Slender_finger	Cerebellar_hypoplasia	Brisk_reflexes	Joint_laxity	High_pitched_voice	Ketosis	Hypoplasia_of_the_corpus_callosum	Broad-based_gait	Fine_hair
Primary_orthostatic_tremor	Rare_neurologic_disease	Tremor	Abnormality_of_extrapyramidal_motor_function	Abnormality_of_the_musculature	Myalgia	Muscle_spasm	EMG_abnormality	Abnormality_of_movement
Primary_progressive_freezing_gait	Rare_neurologic_disease	Postural_instability	Difficulty_walking	Frequent_falls	Hypertension	Hyperreflexia	Rigidity	Bradykinesia	Neurological_speech_impairment	Clonus	Postural_tremor	Urinary_incontinence	Dementia	Sensory_neuropathy	Dysphagia	Cerebral_cortical_atrophy	Gait_imbalance	Shuffling_gait	Babinski_sign	Impaired_smooth_pursuit	Restless_legs	Lewy_bodies
PRKAR1B-related_neurodegenerative_dementia_with_intermediate_filaments	Rare_neurologic_disease	Dementia	Inappropriate_behavior	Frontotemporal_dementia	Motor_deterioration	Memory_impairment	Abnormal_neuron_morphology	Short_attention_span	Anxiety	Apathy	Parkinsonism	Bradykinesia	Postural_instability	Shuffling_gait	Language_impairment	Diffuse_cerebral_atrophy	Falls	Muscle_stiffness	Short_stepped_shuffling_gait	Impaired_visuospatial_constructive_cognition	Inertia	Frontotemporal_cerebral_atrophy	Spinocerebellar_tract_degeneration	Motor_neuron_atrophy
Progressive_encephalopathy_with_leukodystrophy_due_to_DECR_deficiency	Rare_neurologic_disease	Microcephaly	Nystagmus	Seizures	Global_developmental_delay	Choreoathetosis	Cerebellar_atrophy	Neonatal_hypotonia	Dystonia	Failure_to_thrive	Pancreatitis	Renal_tubular_acidosis	Organic_aciduria	Hypoplasia_of_the_corpus_callosum	Ventriculomegaly	Hyperlysinemia	Leukodystrophy	Progressive_encephalopathy	Nonprogressive_cerebellar_ataxia	Progressive_spastic_quadriplegia	Decreased_activity_of_NADPH_oxidase	Decreased_plasma_carnitine	Stress/infection-induced_lactic_acidosis	Central_sleep_apnea	Abnormality_of_carnitine_metabolism	Aspiration_pneumonia	Abnormal_involuntary_eye_movements	Abnormal_basal_ganglia_MRI_signal_intensity	Cerebral_visual_impairment
Progressive_essential_tremor-speech_impairment-facial_dysmorphism-intellectual_disability-abnormal_behavior_syndrome	Rare_neurologic_disease	Mandibular_prognathia	Long_philtrum	Macrotia	Aggressive_behavior	Self-mutilation	Global_developmental_delay	Mood_changes	Hand_tremor	Poor_speech	Waddling_gait	High_narrow_palate	Intellectual_disability_severe	Narrow_palpebral_fissure	Ureteral_duplication	Thick_eyebrow	Inappropriate_laughter	Hypothyroidism	Inability_to_walk	Melanoma	Breast_carcinoma	Duplication_of_renal_pelvis	Endometrial_carcinoma
Progressive_hemifacial_atrophy	Rare_neurologic_disease	Abnormality_of_the_mandible	Facial_asymmetry	Micrognathia	Irregular_hyperpigmentation	Seizures	Abnormality_of_the_musculature	Aplasia/Hypoplasia_of_the_skin	Asymmetric_growth	Deeply_set_eye	Ptosis	Heterochromia_iridis
Progressive_myoclonic_epilepsy_type_1	Rare_neurologic_disease	Myoclonus	Limb_ataxia	EEG_with_polyspike_wave_complexes	Morning_myoclonic_jerks	Ataxia	Dysarthria	Intention_tremor	Dementia	Cutaneous_photosensitivity	Intellectual_disability
Progressive_myoclonic_epilepsy_type_3	Rare_neurologic_disease	Intellectual_disability	Dysarthria	Myoclonus	Developmental_regression	Progressive_truncal_ataxia	Progressive_psychomotor_deterioration	Focal_myoclonic_seizures	Focal_EEG_discharges_with_secondary_generalization	Microcephaly	Abnormality_of_vision	Optic_atrophy	Dementia	Cerebellar_atrophy	Photomyoclonic_seizures	Cerebral_atrophy	Generalized_tonic-clonic_seizures	Progressive_cerebellar_ataxia	Febrile_seizures	Aplasia/Hypoplasia_of_the_corpus_callosum	EEG_with_focal_epileptiform_discharges	Chin_myoclonus	Limb_myoclonus
Progressive_myoclonic_epilepsy_with_dystonia	Rare_neurologic_disease	Dystonia	Myoclonus	Recurrent_upper_respiratory_tract_infections	Abnormal_pyramidal_sign	Microcephaly	EEG_with_irregular_generalized_spike_and_wave_complexes	Generalized_myoclonic_seizures	Status_epilepticus	Delayed_CNS_myelination	Developmental_regression	Generalized_neonatal_hypotonia	Feeding_difficulties	Epileptic_encephalopathy	Global_developmental_delay	Hemiparesis	Abnormality_of_extrapyramidal_motor_function	Excessive_daytime_sleepiness	Hemiplegia	Diffuse_cerebral_atrophy	Poor_visual_behavior_for_age	Diffuse_cerebellar_atrophy	Optic_atrophy
Progressive_non-fluent_aphasia	Rare_neurologic_disease	Thickened_nuchal_skin_fold	Behavioral_abnormality	Restlessness	Depressivity	Anxiety	Personality_changes	Mental_deterioration	Stroke	Parkinsonism	Abnormality_of_extrapyramidal_motor_function	Frontotemporal_dementia	Neurofibrillary_tangles	Apraxia	Mutism	Memory_impairment	Dysphasia	Abnormal_lower_motor_neuron_morphology	Aphasia	Motor_aphasia	Astrocytosis	Abnormality_of_the_cerebral_white_matter	Frontotemporal_cerebral_atrophy	Grammar-specific_speech_disorder	Temporal_cortical_atrophy	Alexia	Dysgraphia	EEG_with_continuous_slow_activity	Perseveration	Abnormal_brain_FDG_positron_emission_tomography	Spoken_Word_Recognition_Deficit	Brain_neoplasm	Senile_plaques	Lewy_bodies
Progressive_supranuclear_palsy	Rare_neurologic_disease	Supranuclear_gaze_palsy	Supranuclear_ophthalmoplegia	Dysphagia	Postural_instability	Unsteady_gait	Falls	Neuronal_loss_in_central_nervous_system	Abnormal_synaptic_transmission	Impulsivity	Vertical_supranuclear_gaze_palsy	Slow_saccadic_eye_movements	Blepharospasm	Depressivity	Delayed_speech_and_language_development	Dystonia	Bradykinesia	Cerebral_cortical_atrophy	Gliosis	Pseudobulbar_signs	Memory_impairment	Aphasia	Cognitive_impairment	Abnormality_of_eye_movement	Dementia	Tremor	Rigidity
Progressive_supranuclear_palsy-corticobasal_syndrome	Rare_neurologic_disease	Apraxia	Sensory_impairment	Progressive_extrapyramidal_muscular_rigidity	Bradykinesia	Slow_saccadic_eye_movements	Postural_instability	Rigidity	Frequent_falls	Respiratory_distress	Dysphagia	Diminished_movement	Dysarthria	Memory_impairment	Vertical_supranuclear_gaze_palsy	Aphasia	Speech_articulation_difficulties	Focal_dystonia	Tremor	Frontal_release_signs	Abnormal_pyramidal_sign	Limb_apraxia	Limb_myoclonus	Involuntary_movements	Slowed_horizontal_saccades	Jerky_head_movements	Hand_clenching	Abnormal_saccadic_eye_movements	Mental_deterioration	Personality_changes	Parkinsonism_with_favorable_response_to_dopaminergic_medication
Progressive_supranuclear_palsy-parkinsonism_syndrome	Rare_neurologic_disease	Bradykinesia	Axial_muscle_stiffness	Rigidity	Tremor	Abnormality_of_eye_movement	Mental_deterioration	Falls	Postural_instability	Respiratory_distress	Neuromuscular_dysphagia	Dystonia	Parkinsonism_with_favorable_response_to_dopaminergic_medication	Apathy	Depressivity	Impaired_visuospatial_constructive_cognition	Vertical_supranuclear_gaze_palsy	Abnormal_saccadic_eye_movements	Neurological_speech_impairment	Anxiety	Memory_impairment
Progressive_supranuclear_palsy-progressive_non-fluent_aphasia_syndrome	Rare_neurologic_disease	Speech_apraxia	Grammar-specific_speech_disorder	Spoken_Word_Recognition_Deficit	Mental_deterioration	Poor_speech	Deficit_in_phonologic_short-term_memory	Speech_articulation_difficulties	Abnormal_speech_prosody	Progressive_extrapyramidal_muscular_rigidity	Vertical_supranuclear_gaze_palsy	Falls	Apathy	Anomia	Stuttering	Parkinsonism	Clumsiness	Dysphagia	Postural_instability	Aphasia	Limb_apraxia	Neurological_speech_impairment
Progressive_supranuclear_palsy-pure_akinesia_with_gait_freezing_syndrome	Rare_neurologic_disease	Freezing_of_gait	Abnormal_speech_prosody	Micrographia	Fixed_facial_expression	Weak_voice	Rigidity	Tremor	Gait_imbalance	Loss_of_ability_to_walk	Palilalia	Tachylalia	Akinesia	Dementia	Abnormal_saccadic_eye_movements	Unsteady_gait	Short_stepped_shuffling_gait	Falls	Spastic_dysarthria	Distal_lower_limb_muscle_weakness	Hypometric_saccades	Oculomotor_apraxia	Blepharospasm	Vertical_supranuclear_gaze_palsy	Neuromuscular_dysphagia	Bradykinesia
Proximal_myopathy_with_extrapyramidal_signs	Rare_neurologic_disease	Global_developmental_delay	Dystonia	Chorea	Orofacial_dyskinesia	Resting_tremor	Difficulty_walking	Increased_variability_in_muscle_fiber_diameter	Centrally_nucleated_skeletal_muscle_fibers	Proximal_muscle_weakness	Involuntary_movements	Progressive_extrapyramidal_movement_disorder	Progressive_extrapyramidal_muscular_rigidity	Difficulty_running	Abnormal_basal_ganglia_MRI_signal_intensity	Central_core_regions_in_muscle_fibers	Microcephaly	Ptosis	Ophthalmoplegia	Optic_atrophy	Ataxia	Peripheral_axonal_neuropathy	Mildly_elevated_creatine_kinase	Hearing_impairment	Insulin-resistant_diabetes_mellitus	Cardiomyopathy
Proximal_myotonic_myopathy	Rare_neurologic_disease	Cataract	Myotonia
Proximal_spinal_muscular_atrophy	Rare_neurologic_disease	Skeletal_muscle_atrophy	Proximal_muscle_weakness	Bulbar_palsy	Areflexia	Tongue_fasciculations	Reduced_tendon_reflexes	Dysphagia	Poor_suck	Recurrent_aspiration_pneumonia	Difficulty_walking	Distal_muscle_weakness	Inability_to_walk	Neonatal_respiratory_distress	Respiratory_insufficiency_due_to_muscle_weakness	Axial_muscle_weakness	Difficulty_climbing_stairs	Quadriceps_muscle_weakness	Intercostal_muscle_weakness	Recurrent_infections_due_to_aspiration	Difficulty_running	Fatigue	Weakness_of_facial_musculature	Triceps_weakness	Muscular_hypotonia	Global_developmental_delay	Motor_delay	Neonatal_hypotonia	Facial_diplegia	Flexion_contracture	Decreased_fetal_movement	Atrial_septal_defect	Constipation	Gastroesophageal_reflux	Restrictive_ventilatory_defect	Poor_head_control	Gastroparesis	Scoliosis	Hypoventilation	Hip_dislocation	Multiple_joint_contractures	Respiratory_failure	Thoracic_kyphosis	Difficulty_standing	Knee_flexion_contracture	Absent_patellar_reflexes	Distal_upper_limb_muscle_weakness	Distal_lower_limb_muscle_weakness	Bradycardia
Psychogenic_movement_disorders	Rare_neurologic_disease	Gait_disturbance	Neurological_speech_impairment	Abnormality_of_movement
Pudendal_neuralgia	Rare_neurologic_disease	Impotence	Constipation	Episodic_abdominal_pain	Paresthesia	Back_pain	Abdominal_colic	Dyspareunia	Scrotal_pain	Vulvodynia	Pollakisuria	Dysuria	Pruritus	Sensory_impairment	Neoplasm_of_the_genitourinary_tract	Genital_neoplasm	Anal_canal_adenocarcinoma	Insomnia	Epigastric_pain
PURA-related_severe_neonatal_hypotonia-seizures-encephalopathy_syndrome	Rare_neurologic_disease	Intellectual_disability	Absent_speech	Broad-based_gait	Infantile_muscular_hypotonia	Delayed_fine_motor_development	Neurodevelopmental_delay	Abnormality_of_the_eye	Abnormality_of_vision	Abnormal_conjugate_eye_movement	Soft_skin	Seizures	Excessive_daytime_somnolence	Motor_delay	Dystonia	Constipation	Hypothermia	Apnea	Exaggerated_startle_response	Drooling	Inability_to_walk	Hypoventilation	Obstructive_sleep_apnea	Breathing_dysregulation	Central_sleep_apnea	Receptive_language_delay	Feeding_difficulties	Stereotypical_hand_wringing	Recurrent_singultus	Low_levels_of_vitamin_D	Dyskinesia	Abnormality_of_the_genitourinary_system	Retrognathia	Full_cheeks	Strabismus	Hypermetropia	Esotropia	Nystagmus	Abnormality_of_the_endocrine_system	Abnormality_of_the_skeletal_system	Osteoporosis	Myoclonus	Hip_dysplasia	Joint_laxity	Abnormal_heart_morphology	Deep_philtrum	Dysphagia	Gastroesophageal_reflux	Myopathic_facies
PURA-related_severe_neonatal_hypotonia-seizures-encephalopathy_syndrome_due_to_a_point_mutation	Rare_neurologic_disease	Seizures	Global_developmental_delay	Respiratory_distress	Feeding_difficulties_in_infancy	Myopathic_facies	Severe_global_developmental_delay	High_palate	Thin_upper_lip_vermilion	Microcephaly	Long_face	Epicanthus	Full_cheeks	Facial_hypotonia	Facial_asymmetry	High_forehead	Underdeveloped_nasal_alae	Wide_nasal_bridge	Broad_nasal_tip	Anteverted_nares	Telecanthus	Myopia	Upslanted_palpebral_fissure	Long_palpebral_fissure	Short_attention_span	Anxiety	Ataxia	Dystonia	Frontal_bossing	Broad-based_gait	Exaggerated_startle_response	Abnormality_of_primary_teeth	Severe_muscular_hypotonia	External_ear_malformation	Tented_upper_lip_vermilion	Incisor_macrodontia	Prominent_forehead	Handgrip_myotonia	Dyskinesia
Pure_autonomic_failure	Rare_neurologic_disease	Anhidrosis	Orthostatic_hypotension	Dysautonomia	Abnormality_of_circulating_catecholamine_level	Constitutional_symptom	Urinary_incontinence	Syncope	Constipation	Dysuria	Impotence
Pyridoxal_phosphate-responsive_seizures	Rare_neurologic_disease	Status_epilepticus	Epileptic_encephalopathy	Abnormality_of_eye_movement	Seizures	Global_developmental_delay	Hypertonia	Myoclonus	Failure_to_thrive	Abnormality_of_the_amniotic_fluid	Premature_birth	Metabolic_acidosis	Hypoglycemia	Increased_serum_lactate	Global_brain_atrophy	Unsteady_gait	Decreased_CSF_homovanillic_acid	Hypoargininemia	Muscular_hypotonia_of_the_trunk	EEG_with_burst_suppression	Feeding_difficulties	High-pitched_cry	Low_APGAR_score	Microcephaly	Pyridoxine-responsive_sideroblastic_anemia	Abnormality_of_glycine_metabolism	Abnormality_of_threonine_metabolism	Abnormal_circulating_histidine_concentration	Abnormality_of_arginine_metabolism	Abnormality_of_tyrosine_metabolism
Pyridoxine-dependent_epilepsy	Rare_neurologic_disease	Seizures	Irritability	Prenatal_movement_abnormality	Hypoplasia_of_the_corpus_callosum	Status_epilepticus	Neonatal_respiratory_distress	Focal-onset_seizure	EEG_with_generalized_slow_activity	EEG_with_burst_suppression	Early_onset_absence_seizures	Feeding_difficulties	Neurodevelopmental_delay	Focal_aware_motor_seizure	Fetal_distress	Low_APGAR_score	Facial_grimacing	Abnormality_of_eye_movement	Restlessness	Intellectual_disability	Generalized_tonic-clonic_seizures	Ventriculomegaly	Delayed_CNS_myelination	Enlarged_cisterna_magna	Hypsarrhythmia	Atonic_seizure	Multifocal_epileptiform_discharges	Epileptic_spasms	Focal_myoclonic_seizures	EEG_with_generalized_epileptiform_discharges	EEG_with_generalized_sharp_slow_waves	Meconium_stained_amniotic_fluid	Brain_atrophy	Widened_subarachnoid_space	Neonatal_asphyxia	Hypoglycemia	Lactic_acidosis
Qazi-Markouizos_syndrome	Rare_neurologic_disease	Delayed_ossification_of_carpal_bones	EEG_abnormality	Infantile_muscular_hypotonia	Severe_global_developmental_delay	Chronic_constipation	Dysharmonic_bone_age	Cryptorchidism	Tapered_finger	Seizures	Recurrent_infections	Open_mouth	Broad_philtrum	Hypertelorism	Prominent_nasal_bridge	Torticollis	Strabismus	Hypoplasia_of_teeth	Pectus_excavatum	Small_nail	Drooling	High_narrow_palate	Abdominal_distention	Abnormal_dermatoglyphics
Rapid-onset_dystonia-parkinsonism	Rare_neurologic_disease	Hypomimic_face	Torticollis	Dysarthria	Motor_delay	Parkinsonism	Dysphagia	Gait_ataxia	Bradykinesia	Postural_instability	Mutism	Drooling	Limb_dystonia	Craniofacial_dystonia	Emotional_lability	Depressivity	Anxiety	Seizures	Cerebellar_atrophy	Resting_tremor	Generalized_hypotonia
Rare_non-syndromic_intellectual_disability	Rare_neurologic_disease	Intellectual_disability	Global_developmental_delay	Generalized_tonic-clonic_seizures	Polymicrogyria	Microcephaly	Hearing_impairment	Ptosis	Autistic_behavior	Seizures	Spasticity	Generalized_hypotonia	Absent_septum_pellucidum	Dystonia	Mood_changes	Cerebral_atrophy	Hypoplasia_of_the_corpus_callosum	Difficulty_walking	Poor_speech	Dysgenesis_of_the_basal_ganglia	Hypoplastic_hippocampus	Dyskinesia	Cerebral_visual_impairment
RARS-related_autosomal_recessive_hypomyelinating_leukodystrophy	Rare_neurologic_disease	Poor_eye_contact	Ataxia	Intellectual_disability_mild	Dysarthria	Global_developmental_delay	Dysmetria	Dystonia	Hyperreflexia	Lower_limb_spasticity	Hypoplasia_of_the_corpus_callosum	Intention_tremor	Difficulty_walking	Poor_head_control	Cerebral_hypomyelination	Lower_limb_hypertonia	Progressive_extrapyramidal_movement_disorder	Developmental_stagnation	Infantile_axial_hypotonia	Hyperintensity_of_cerebral_white_matter_on_MRI	Microcephaly	Vomiting	Increased_serum_lactate	Diffuse_cerebral_atrophy	Pseudobulbar_paralysis	Absent_smooth_pursuit	Focal-onset_seizure	Nystagmus
Rasmussen_subacute_encephalitis	Rare_neurologic_disease	Functional_motor_deficit	Focal-onset_seizure	Hemiparesis	Ventriculomegaly	Focal_aware_seizure	Focal_impaired_awareness_seizure	Autoimmunity	Involuntary_movements	Focal_motor_seizure	EEG_with_focal_spikes	EEG_with_focal_sharp_slow_waves	Subcortical_cerebral_atrophy	Epilepsia_partialis_continua	Repeated_focal_motor_seizures	Cerebral_cortical_hemiatrophy	Cognitive_impairment	Visual_loss	Behavioral_abnormality	Emotional_lability	Irritability	Hyperactivity	Dysarthria	Specific_learning_disability	Abnormality_of_the_basal_ganglia	Memory_impairment	Dysphasia	Inability_to_walk	Abnormality_of_the_cerebrospinal_fluid	Increased_CSF_protein	Antinuclear_antibody_positivity	Attention_deficit_hyperactivity_disorder	Generalized_tonic-clonic_seizures_with_focal_onset	Generalized_tonic_seizures	Somatosensory_auras	Interictal_epileptiform_activity	EEG_with_focal_epileptiform_discharges	Reduced_brain_N-acetyl_aspartate_level_by_MRS	Anti-DNA_antibody_positivity	Generalized_tonic-clonic_seizures_without_focal_onset	Continuous_spike_and_waves_during_slow_sleep	Increased_theta_frequency_activity_in_EEG	Hemidystonia	Focal_cortical_dysplasia	Dyskinesia	Global_brain_atrophy	Decreased_circulating_total_IgA	Epileptic_spasms	Generalized_convulsive_status_epilepticus
Ravine_syndrome	Rare_neurologic_disease	Failure_to_thrive	Anorexia	Progressive_encephalopathy	Decreased_body_weight	Abnormality_of_the_posterior_cranial_fossa	Ataxia	Spasticity	Abnormality_of_the_basal_ganglia	Abnormality_of_brainstem_morphology	Atrophy/Degeneration_affecting_the_brainstem	Abnormality_of_eye_movement	Abnormal_auditory_evoked_potentials	Abnormality_of_the_larynx	Apnea
Recessive_mitochondrial_ataxia_syndrome	Rare_neurologic_disease	Ophthalmoplegia	Behavioral_abnormality	Hashimoto_thyroiditis	Seizures	Ataxia	Areflexia	Gait_disturbance	Generalized_hypotonia	Dysmetria	Dysphagia	Headache	Positive_Romberg_sign	Limb_dysmetria	Impaired_vibratory_sensation	Sensory_axonal_neuropathy	Increased_serum_pyruvate	Peripheral_neuropathy	Abnormality_of_central_motor_conduction	ST_segment_elevation	Abnormality_of_movement	Cognitive_impairment	Dysarthria
Recurrent_metabolic_encephalomyopathic_crises-rhabdomyolysis-cardiac_arrhythmia-intellectual_disability_syndrome	Rare_neurologic_disease	Intellectual_disability	Global_developmental_delay	Increased_serum_lactate	Ketonuria	Abnormal_EKG	Elevated_serum_creatine_kinase	EMG:_myopathic_abnormalities	Delayed_speech_and_language_development	Seizures	Ataxia	Prolonged_QT_interval	Hypoglycemia	Hyperammonemia	Abnormality_of_extrapyramidal_motor_function	Global_brain_atrophy	Incoordination	Developmental_regression	Gastrointestinal_dysmotility	Elevated_hepatic_transaminase	Lactic_acidosis	Involuntary_movements	Compensated_hypothyroidism	Feeding_difficulties_in_infancy	Acute_rhabdomyolysis	Moderate_global_developmental_delay	Arrhythmia	Delayed_ability_to_walk	Supranuclear_gaze_palsy	Nystagmus	Amblyopia	Optic_atrophy	Hypertonia	Stroke	Dystonia	Hyperreflexia	Dysphagia	Generalized_tonic-clonic_seizures	Generalized_myoclonic_seizures	Clonus	Hypoglycemic_seizures	Focal_impaired_awareness_seizure	Babinski_sign	Generalized_tonic_seizures	Mild_global_developmental_delay	Severe_global_developmental_delay	Infantile_spasms	Multifocal_seizures	Elevated_plasma_acylcarnitine_levels
Refsum_disease	Rare_neurologic_disease	Renal_insufficiency	Anosmia	Abnormality_of_the_eye	Retinopathy	Abnormality_of_eye_movement	Abnormality_of_vision	Visual_impairment	Ptosis	Cataract	Progressive_visual_loss	Microphthalmia	Nystagmus	Nyctalopia	Dry_skin	Ataxia	Cardiomyopathy	Splenomegaly	Sensorineural_hearing_impairment	Miosis	Muscular_hypotonia	Abnormality_of_the_foot	Pes_cavus	Hammertoe	Abnormality_of_metabolism/homeostasis	Respiratory_insufficiency	Nail_dysplasia	Developmental_regression	Skeletal_dysplasia	Skeletal_muscle_atrophy	Hemiplegia/hemiparesis	Abnormality_of_epiphysis_morphology	Abnormal_pyramidal_sign	Abnormality_of_retinal_pigmentation	Ichthyosis	Peripheral_neuropathy	Short_metacarpal	Intellectual_disability_severe	Heart_block
Retinal_vasculopathy_with_cerebral_leukoencephalopathy_and_systemic_manifestations	Rare_neurologic_disease	Abnormality_of_the_cerebral_white_matter	Abnormal_retinal_vascular_morphology	Raynaud_phenomenon	Proteinuria	Glomerulosclerosis	Nephropathy	Behavioral_abnormality	Hypertension	Normochromic_anemia	Normocytic_anemia	Migraine	Elevated_alkaline_phosphatase	Elevated_serum_creatinine	Abnormality_of_the_hepatic_vasculature	Compensated_hypothyroidism	Nodular_regenerative_hyperplasia_of_liver	Elevated_gamma-glutamyltransferase_activity	Cognitive_impairment	Brain_imaging_abnormality	Glaucoma	Psychosis	Depressivity	Irritability	Anxiety	Apathy	Telangiectasia	Visual_field_defect	Hemiparesis	Cardiomyopathy	Migraine_with_aura	Migraine_without_aura	Pneumonia	Generalized-onset_seizure	Gastrointestinal_hemorrhage	Progressive_neurologic_deterioration	Memory_impairment	Aphasia	Cerebral_calcification	Somatosensory_auras	Hemianopia	Weakness_of_facial_musculature	Retinal_neovascularization	Retinal_cotton_wool_spot	Macular_edema	Focal_hyperintensity_of_cerebral_white_matter_on_MRI	Focal_hypointensity_of_cerebral_white_matter_on_MRI	Sepsis	Skin_rash
Rett_syndrome	Rare_neurologic_disease	Progressive_microcephaly	Stereotypy	Global_developmental_delay	Gait_disturbance	Absent_speech	Developmental_regression	Abnormal_pattern_of_respiration	Stereotypical_hand_wringing	High-pitched_cry	Seizures	Dystonia	Failure_to_thrive	Bradykinesia	EEG_abnormality	Difficulty_walking	Skeletal_muscle_atrophy	Limb_apraxia	Agitation	Cholecystitis	Hyperammonemia	Increased_serum_lactate	Sleep_disturbance	Increased_CSF_lactate	Inability_to_walk	Scoliosis	Increased_serum_pyruvate	Infantile_muscular_hypotonia	Abnormal_autonomic_nervous_system_physiology	Increased_serum_leptin	Congenital_microcephaly
Reversible_cerebral_vasoconstriction_syndrome	Rare_neurologic_disease	Vasospasm	Thunderclap_headache	Migraine	Recurrent_paroxysmal_headache	Brain_imaging_abnormality	Photophobia	Blurred_vision	Confusion	Cerebral_hemorrhage	Abnormal_bleeding	Vomiting	Subarachnoid_hemorrhage	Ischemic_stroke	Phonophobia	Transient_ischemic_attack	Leukoencephalopathy	Functional_motor_deficit	Dilatation_of_the_cerebral_artery	Abnormal_cerebral_artery_morphology	Seizures	Cerebral_edema	Carotid_artery_dissection	Intraventricular_hemorrhage	Subdural_hemorrhage
Riboflavin_transporter_deficiency	Rare_neurologic_disease	Hypogonadism	Abnormality_of_eye_movement	Visual_impairment	Ptosis	Optic_disc_pallor	Color_vision_defect	Aggressive_behavior	Hallucinations	Gynecomastia	Hypertension	Diabetes_insipidus	Intellectual_disability	Seizures	Ataxia	Muscular_hypotonia	Dysarthria	Hyporeflexia	Bulbar_palsy	Abnormal_cranial_nerve_morphology	Muscle_weakness	Myoclonus	Tremor	Progressive_hearing_impairment	Dysphagia	Respiratory_insufficiency	Cerebral_cortical_atrophy	Dysautonomia	Skeletal_muscle_atrophy	Limb_muscle_weakness	Cachexia	Cranial_nerve_paralysis	Iris_hypopigmentation	Abnormality_of_macular_pigmentation	Sleep_apnea	Facial_palsy
Richieri_Costa-da_Silva_syndrome	Rare_neurologic_disease	Pectus_carinatum	Intellectual_disability_profound	Kyphoscoliosis	Short_stature	Generalized_bone_demineralization	Intermittent_painful_muscle_spasms	Handgrip_myotonia	Myotonia_of_the_upper_limb	Weak_voice	Dysphagia	Falls	Skeletal_muscle_hypertrophy	Decreased_anterioposterior_diameter_of_lumbar_vertebral_bodies	Vertebral_wedging	Distal_lower_limb_muscle_weakness	EMG:_myokymic_discharges	Esotropia	Hyporeflexia	Areflexia	Metatarsus_adductus	Inability_to_walk	Genu_valgum	Decreased_muscle_mass	Beaking_of_vertebral_bodies	Asymmetric_limb_muscle_stiffness	Narrow_mouth	Abnormality_of_the_dentition	Low_anterior_hairline	Low-set_ears	Short_neck	Blepharophimosis	Joint_dislocation	Limitation_of_joint_mobility	Diastasis_recti	High_pitched_voice	Flat_face
Rigid_spine_syndrome	Rare_neurologic_disease	Neck_muscle_weakness	Generalized_hypotonia	Respiratory_insufficiency	Scoliosis	Myopathy	Spinal_rigidity	Abnormality_of_skeletal_morphology	Hyporeflexia	Pneumonia	Poor_head_control	Elbow_flexion_contracture	Hamstring_contractures	Skeletal_muscle_atrophy	Hip_contracture	Hyperlordosis	Abnormality_on_pulmonary_function_testing	Cardiac_conduction_abnormality	Global_developmental_delay	Waddling_gait	Gowers_sign
Rolandic_epilepsy	Rare_neurologic_disease	EEG_with_centrotemporal_focal_spike_waves	Drooling	Hemifacial_seizures	Generalized_tonic-clonic_seizures_with_focal_onset	Speech_articulation_difficulties	Sleep_apnea	Laryngospasm	Focal_seizures_afebril	Depressivity	Short_attention_span	Anxiety	Specific_learning_disability	Mood_changes	Migraine	Febrile_seizures	Paresthesia	Intellectual_disability_borderline	Attention_deficit_hyperactivity_disorder	Dysesthesia	EEG_with_irregular_generalized_spike_and_wave_complexes	Atypical_absence_seizure
Rolandic_epilepsy-paroxysmal_exercise-induced_dystonia-writer's_cramp_syndrome	Rare_neurologic_disease	Horizontal_nystagmus	Paroxysmal_dystonia	Writer's_cramp	Prolonged_somatosensory_evoked_potentials	Hemifacial_seizures	EEG_with_parietal_sharp_waves	EEG_with_parietal_focal_spike_waves	Seizures
Roussy-Levy_syndrome	Rare_neurologic_disease	Nystagmus	Areflexia	Pes_cavus	Talipes_equinovarus	Gait_ataxia	Limb_ataxia	Postural_tremor	Clumsiness	Unsteady_gait	Difficulty_walking	Impaired_vibratory_sensation	Scoliosis	Kyphoscoliosis	Decreased_motor_nerve_conduction_velocity	Sensory_impairment	Distal_amyotrophy	Acute_demyelinating_polyneuropathy	Sensorimotor_neuropathy	Impaired_pain_sensation	Lower_limb_muscle_weakness	Frequent_falls	Urinary_bladder_sphincter_dysfunction	Genu_valgum	Skeletal_muscle_atrophy	Babinski_sign	Intrinsic_hand_muscle_atrophy
S-adenosylhomocysteine_hydrolase_deficiency	Rare_neurologic_disease	Hyperhomocystinemia	Elevated_hepatic_transaminase	Hypoalbuminemia	Abnormality_of_methionine_metabolism	Abnormality_of_homocysteine_metabolism	Strabismus	Esotropia	Behavioral_abnormality	Short_attention_span	Global_developmental_delay	Cerebellar_hypoplasia	Abnormality_of_the_liver	Failure_to_thrive	Growth_delay	Hydrops_fetalis	Abnormality_of_coagulation	Reduced_antithrombin_III_activity	Abnormal_facial_shape	Hypoplasia_of_the_corpus_callosum	Developmental_regression	Poor_head_control	Elevated_serum_creatine_kinase	CNS_hypomyelination	Muscular_dystrophy	Prolonged_prothrombin_time	Reduced_factor_VII_activity	Infantile_muscular_hypotonia	Hypofibrinogenemia	Elevated_coagulation_factor_V_activity	Hypoplasia_of_the_pons	Reduced_prothrombin_activity	Delayed_myelination	Hyperintensity_of_cerebral_white_matter_on_MRI	Abnormality_of_the_dentition	Microcephaly	Muscle_weakness	Hepatocellular_carcinoma	Cardiomyopathy	Pes_planus	Ventriculomegaly	Respiratory_failure	Hypermethioninemia	Sensorimotor_neuropathy	Abnormality_of_hair_texture	Widened_subarachnoid_space
Sandifer_syndrome	Rare_neurologic_disease	Torticollis	Gastroesophageal_reflux	Abnormal_head_movements	Abnormal_posturing	Anemia	Hiatus_hernia	Hematemesis	Decreased_cervical_spine_mobility	Feeding_difficulties	Abnormal_involuntary_eye_movements	Esophagitis	Epigastric_pain	Episodic_vomiting
Schilder_disease	Rare_neurologic_disease	Hyperreflexia	Headache	Progressive_neurologic_deterioration	Increased_CSF_protein	CNS_demyelination	Hyperintensity_of_cerebral_white_matter_on_MRI	Esotropia	Diplopia	Seizures	Ataxia	Encephalopathy	Muscle_weakness	Vomiting	Nausea	Postural_instability	Vertigo	Increased_intracranial_pressure	Ankle_clonus	CSF_pleocytosis
Secondary_syringomyelia	Rare_neurologic_disease	Syringomyelia	Hyperintensity_of_MRI_T2_signal_of_the_spinal_cord	Decreased_taste_sensation	Dysphonia	Difficulty_walking	Increased_CSF_protein	Paresthesia	Back_pain	Fatigable_weakness	Sensory_impairment	Cranial_nerve_paralysis	Facial_paralysis	Paroxysmal_vertigo	Paraplegia	Sensory_ataxia	CSF_pleocytosis	Blurred_vision	Nystagmus	Seizures	Bulbar_palsy	Progressive_cerebellar_ataxia	Meningioma	Distal_sensory_loss_of_all_modalities	Pseudobulbar_paralysis	CNS_demyelination	Dysuria
Seizures-intellectual_disability_due_to_hydroxylysinuria_syndrome	Rare_neurologic_disease	Intellectual_disability	Generalized_myoclonic_seizures	Aminoaciduria
Semantic_dementia	Rare_neurologic_disease	Dementia	Aphasia	Brain_atrophy	Visual_agnosia	Anomia	Abnormal_test_result	Neurological_speech_impairment	Dyslexia	Alexia	Dysgraphia	Abulia
Sensory_ataxic_neuropathy-dysarthria-ophthalmoparesis_syndrome	Rare_neurologic_disease	Ptosis	Ophthalmoparesis	Nystagmus	Dysarthria	Hyporeflexia	Myoclonus	Vestibular_dysfunction	Gait_ataxia	Increased_serum_lactate	Positive_Romberg_sign	Impaired_vibratory_sensation	Ragged-red_muscle_fibers	Sensory_ataxic_neuropathy	Increased_variability_in_muscle_fiber_diameter	Proximal_muscle_weakness	Impaired_distal_proprioception	Atrophy/Degeneration_involving_the_spinal_cord	Bilateral_sensorineural_hearing_impairment	Abnormal_thalamic_MRI_signal_intensity	Upgaze_palsy	Abnormal_morphology_of_the_cerebellar_cortex	Cataract	Depressivity	Seizures	Areflexia	Dilated_cardiomyopathy	Migraine	Memory_impairment	Gastroparesis	Intestinal_pseudo-obstruction	Cognitive_impairment
Serotonin_syndrome	Rare_neurologic_disease	Abnormality_of_the_autonomic_nervous_system	Restlessness	Irritability	Anxiety	Mental_deterioration	Confusion	Myoclonus	Tremor	Tachycardia	Diarrhea	Nausea	Insomnia	Abnormal_saccadic_eye_movements	Agitation	Hypertension	Hyperhidrosis	Seizures	Hyperreflexia	Clonus	Tachypnea	Lactic_acidosis	Mydriasis	Decreased_vigilance	Hallucinations	Coma	Hypertonia	Hepatic_failure	Acute_kidney_injury	Fever	Rigidity	Hypotension	Rhabdomyolysis	Disseminated_intravascular_coagulation	Delirium
Severe_Canavan_disease	Rare_neurologic_disease	Macrocephaly	Muscular_hypotonia	Global_developmental_delay	Motor_delay	Absent_speech	Poor_head_control	Inability_to_walk	Functional_motor_deficit	Elevated_brain_N-acetyl_aspartate_level_by_MRS	Visual_fixation_instability	Optic_atrophy	Irritability	Seizures	Lethargy	Hyperreflexia	Joint_stiffness	Weak_cry	Vomiting	Gastroesophageal_reflux	Poor_suck	Generalized_tonic-clonic_seizures	Sleep_disturbance	Babinski_sign	Feeding_difficulties	Cerebral_white_matter_atrophy	Oral-pharyngeal_dysphagia	Blindness	Spasticity	Megalencephaly	Nasogastric_tube_feeding	Pseudobulbar_signs	Gastrostomy_tube_feeding_in_infancy	Decerebrate_rigidity
Severe_congenital_nemaline_myopathy	Rare_neurologic_disease	Abnormality_of_the_thorax	Motor_delay	Flexion_contracture	Decreased_fetal_movement	Polyhydramnios	Breech_presentation	Dysphagia	Hypokinesia	Respiratory_failure	Skeletal_muscle_atrophy	Axial_muscle_weakness	Nemaline_bodies	Type_1_muscle_fiber_predominance	Multiple_prenatal_fractures	Severe_muscular_hypotonia	Increased_connective_tissue	Facial_palsy	Hypospadias	Micropenis	Large_fontanelles	Low-set_ears	Ophthalmoplegia	Abnormality_of_the_diaphragm	Thin_ribs	Adducted_thumb	Facial_diplegia	Premature_birth	Pulmonary_hypoplasia	Arthrogryposis_multiplex_congenita	Edema_of_the_dorsum_of_hands
Severe_intellectual_disability-progressive_postnatal_microcephaly-midline_stereotypic_hand_movements_syndrome	Rare_neurologic_disease	Progressive_microcephaly	Behavioral_abnormality	Impaired_social_interactions	Seizures	Muscular_hypotonia	Global_developmental_delay	Developmental_regression	Intellectual_disability_severe	Stereotypical_hand_wringing	Micrognathia	Macrotia	Strabismus	Horizontal_nystagmus	Absent_speech	Hyperkinetic_movements	Inappropriate_crying	Self-injurious_behavior
Severe_intellectual_disability-progressive_spastic_diplegia_syndrome	Rare_neurologic_disease	Microcephaly	Intellectual_disability	Spasticity	Motor_delay	Abnormal_facial_shape	Poor_speech	Muscular_hypotonia_of_the_trunk	Abnormality_of_the_eye	Behavioral_abnormality	Developmental_regression	Congenital_microcephaly	Thin_upper_lip_vermilion	Smooth_philtrum	Long_philtrum	Underdeveloped_nasal_alae	Broad_nasal_tip	Strabismus	Hypermetropia	Myopia	Aggressive_behavior	Autistic_behavior	Hypoplasia_of_the_corpus_callosum	Ventriculomegaly	Tethered_cord	Delayed_CNS_myelination	Sleep_disturbance	Syringomyelia	Low_hanging_columella	Abnormal_temper_tantrums	Self-injurious_behavior	Hearing_impairment	Seizures
Severe_motor_and_intellectual_disabilities-sensorineural_deafness-dystonia_syndrome	Rare_neurologic_disease	Hearing_impairment	Failure_to_thrive	Abnormal_facial_shape	Abnormal_pyramidal_sign	Microcephaly	Congenital_strabismus	Intrauterine_growth_retardation	Recurrent_fever	Tetraplegia	Cerebral_hypomyelination	Abnormality_of_eye_movement	Optic_atrophy	Aggressive_behavior	Hyperactivity	Cerebellar_atrophy	Cerebral_cortical_atrophy	CNS_hypomyelination	Corpus_callosum_atrophy	Brain_atrophy	Cerebral_white_matter_atrophy
Severe_neonatal_hypotonia-seizures-encephalopathy_syndrome_due_to_5q31.3_microdeletion	Rare_neurologic_disease	High_palate	Narrow_forehead	Micrognathia	Telecanthus	Ptosis	Delayed_speech_and_language_development	Motor_delay	Neonatal_hypotonia	Deep_philtrum	Respiratory_distress	EEG_abnormality	Depressed_nasal_bridge	Sparse_lateral_eyebrow	Prominent_metopic_ridge	Feeding_difficulties_in_infancy	Tented_upper_lip_vermilion	Intellectual_disability_severe	Brain_atrophy	Delayed_myelination	Brain_imaging_abnormality	Low-set_ears	Anteverted_nares	Downslanted_palpebral_fissures	Seizures	Myoclonus	Abnormal_heart_morphology	Apnea	Hypoventilation	Short_nose	Recurrent_pneumonia	Severe_muscular_hypotonia	Polydactyly	Epileptic_spasms	Speech_apraxia	Focal_tonic_seizure	Aspiration_pneumonia	Generalized_tonic-clonic_seizures_without_focal_onset
Severe_neurodegenerative_syndrome_with_lipodystrophy	Rare_neurologic_disease	Progressive_encephalopathy	Hyperinsulinemia	Insulin_resistance	Reduced_subcutaneous_adipose_tissue	Progressive_psychomotor_deterioration	Generalized_lipodystrophy	Reduced_intraabdominal_adipose_tissue	Cognitive_impairment	Coarse_facial_features	Delayed_speech_and_language_development	Seizures	Ataxia	Spasticity	Myoclonus	Tremor	Hyperreflexia	Brisk_reflexes	Hepatic_steatosis	Hypertriglyceridemia	Poor_motor_coordination	Sleep_disturbance	Abnormal_pyramidal_sign	Hyperactivity	Hypertension	Acanthosis_nigricans	Cirrhosis	Cerebral_atrophy	Gait_ataxia	Generalized_hirsutism	Hepatomegaly	Tetraparesis	Caudate_atrophy	Limb_dystonia	Neuronal_loss_in_central_nervous_system	Respiratory_failure	Myopathy	Status_epilepticus
Severe_neurodevelopmental_disorder_with_feeding_difficulties-stereotypic_hand_movement-bilateral_cataract	Rare_neurologic_disease	Irritability	Seizures	Global_developmental_delay	Failure_to_thrive	Feeding_difficulties_in_infancy	Infantile_muscular_hypotonia	Stereotypical_hand_wringing	Microcephaly	Intellectual_disability_profound	Sleep_disturbance	Hypsarrhythmia	Intellectual_disability_severe	Broad_nasal_tip	Juvenile_cataract	Spasticity	Flexion_contracture	Cerebral_atrophy	Developmental_regression	Scoliosis	Apneic_episodes_in_infancy	Cerebral_white_matter_hypoplasia	Delayed_myelination	Nasogastric_tube_feeding
Severe_X-linked_intellectual_disability_Gustavson_type	Rare_neurologic_disease	Microcephaly	Optic_atrophy	Seizures	Hypertonia	Severe_postnatal_growth_retardation	Profound_hearing_impairment	Blindness	Spasticity	Small_for_gestational_age	Dilated_fourth_ventricle	Recurrent_upper_respiratory_tract_infections	Small_fontanelle	Apneic_episodes_in_infancy	Intellectual_disability_severe	Brain_atrophy	Nasogastric_tube_feeding	Vesicoureteral_reflux	Large_fontanelles	Micrognathia	Abnormality_of_the_pinna	Macrotia	Triphalangeal_thumb	Dandy-Walker_malformation	Cerebellar_hypoplasia	Myoclonus	Congenital_hip_dislocation	Ventricular_septal_defect	Rocker_bottom_foot	Calcaneovalgus_deformity	Short_nose	Contractures_of_the_large_joints	Severe_muscular_hypotonia	Dilation_of_lateral_ventricles	Equinovarus_deformity
Severe_X-linked_mitochondrial_encephalomyopathy	Rare_neurologic_disease	Delayed_speech_and_language_development	Areflexia	Generalized_hypotonia	Skeletal_muscle_atrophy	Generalized_muscle_weakness	Sensory_axonal_neuropathy	Increased_variability_in_muscle_fiber_diameter	Severe_muscular_hypotonia	Peripheral_neuropathy	Abnormal_corpus_striatum_morphology	Moderate_global_developmental_delay	Irritability	Tongue_fasciculations	Respiratory_insufficiency	Respiratory_distress	Increased_serum_lactate	Hypokinesia	Developmental_regression	Increased_CSF_lactate	Increased_serum_pyruvate	Involuntary_movements	Increased_connective_tissue	Feeding_difficulties_in_infancy
Spastic_ataxia_with_congenital_miosis	Rare_neurologic_disease	Nystagmus	Seizures	Ataxia	Dysarthria	Hyperreflexia	Spastic_ataxia	Hemiplegia/hemiparesis	Congenital_miosis
Spastic_ataxia-corneal_dystrophy_syndrome	Rare_neurologic_disease	Developmental_cataract	Myopia	Optic_atrophy	Corneal_dystrophy	Ataxia	Gait_disturbance	Spastic_ataxia	Spinocerebellar_tract_degeneration	EMG_abnormality	Decreased_antibody_level_in_blood	Hemiplegia/hemiparesis	Aplasia/Hypoplasia_of_the_cerebellum
Spastic_paraparesis-deafness_syndrome	Rare_neurologic_disease	Hypogonadism	Sensorineural_hearing_impairment	Visual_impairment	Cataract	Nystagmus	Ataxia	Gait_disturbance	Hyperreflexia	Spastic_paraparesis	Short_stature	Hemiplegia/hemiparesis	Impaired_pain_sensation	Abnormality_of_movement
Spastic_paraplegia_type_2	Rare_neurologic_disease	Nystagmus	Optic_atrophy	Sensory_neuropathy	Intellectual_disability	Ataxia	Spasticity	Dysarthria	Muscle_weakness	Hyperreflexia	Limitation_of_joint_mobility	Spastic_gait	Abnormality_of_extrapyramidal_motor_function	Pulmonary_embolism	Recurrent_respiratory_infections	Bowel_incontinence	Babinski_sign	Spastic/hyperactive_bladder
Spastic_paraplegia_type_7	Rare_neurologic_disease	Spastic_gait	Urinary_urgency	Supranuclear_gaze_palsy	Nystagmus	Optic_atrophy	Cerebellar_atrophy	Nasal_speech	Impaired_vibration_sensation_in_the_lower_limbs	Lower_limb_hyperreflexia	Ragged-red_muscle_fibers	Sensory_impairment	Babinski_sign	Lower_limb_hypertonia	Attention_deficit_hyperactivity_disorder	Slowed_slurred_speech	Abnormal_pyramidal_sign	Lower_limb_muscle_weakness	Abnormal_mitochondrial_morphology	Abnormality_of_higher_mental_function	Optic_disc_pallor	Dysarthria	Pes_cavus	Cerebral_cortical_atrophy	Abnormality_of_the_cerebral_white_matter	Scoliosis	Upper_limb_muscle_weakness	Specific_learning_disability	Dysphagia	Memory_impairment	Lower_limb_pain
Spastic_paraplegia-facial-cutaneous_lesions_syndrome	Rare_neurologic_disease	Hyperpigmentation_of_the_skin	Urticaria	Hypopigmented_skin_patches	Spasticity	Gait_disturbance	Hyperreflexia	Neurological_speech_impairment	EEG_abnormality	Paraplegia
Spastic_paraplegia-glaucoma-intellectual_disability_syndrome	Rare_neurologic_disease	Glaucoma	Intellectual_disability	Spasticity	Paraplegia
Spastic_paraplegia-intellectual_disability-nystagmus-obesity_syndrome	Rare_neurologic_disease	Deeply_set_eye	Hypermetropia	Nystagmus	Intellectual_disability	Plagiocephaly	Obesity	Hypoplasia_of_the_corpus_callosum	Ventriculomegaly	Delayed_gross_motor_development	Progressive_spastic_paraplegia	Prominent_forehead	Abnormal_CNS_myelination	Esophoria	Polyhydramnios
Spastic_paraplegia-nephritis-deafness_syndrome	Rare_neurologic_disease	Proteinuria	Nephropathy	Sensorineural_hearing_impairment	Intellectual_disability	Spasticity	Gait_disturbance	Hyperreflexia	Neurological_speech_impairment	Paraplegia	Hypertension	Severe_short_stature	Clinodactyly_of_the_5th_finger
Spastic_paraplegia-neuropathy-poikiloderma_syndrome	Rare_neurologic_disease	Poikiloderma	Spastic_gait	Basal_lamina_'onion_bulb'_formation	Distal_amyotrophy	Progressive_spastic_paraplegia	Demyelinating_peripheral_neuropathy	Sensorimotor_neuropathy	Loss_of_eyelashes
Spastic_paraplegia-optic_atrophy-neuropathy_syndrome	Rare_neurologic_disease	Optic_atrophy	Multiple_joint_contractures	Distal_amyotrophy	Optic_disc_pallor	Hyperhidrosis	Dysarthria	Pes_cavus	Impaired_vibration_sensation_in_the_lower_limbs	Delayed_gross_motor_development	Exaggerated_startle_response	Difficulty_walking	Hyporeflexia_of_lower_limbs	Scoliosis	Decreased_number_of_peripheral_myelinated_nerve_fibers	Peripheral_axonal_neuropathy	Progressive_spastic_paraplegia	Hyperreflexia_proximally	Distal_lower_limb_amyotrophy	Nystagmus	Abnormality_of_extrapyramidal_motor_function
Spastic_paraplegia-Paget_disease_of_bone_syndrome	Rare_neurologic_disease	Spastic_paraplegia	Gait_disturbance	Spastic_gait	Lower_limb_hyperreflexia	Elevated_alkaline_phosphatase	Generalized_muscle_weakness	EMG:_neuropathic_changes	Babinski_sign	Bone_pain	Recurrent_fractures	Arthralgia	Increased_spinal_bone_density	Abnormality_of_skeletal_morphology	Tongue_fasciculations	Limb_fasciculations
Spastic_paraplegia-precocious_puberty_syndrome	Rare_neurologic_disease	Dysarthria	Brisk_reflexes	Intellectual_disability_moderate	Progressive_spastic_paraplegia	Precocious_puberty_in_males	Hyperplasia_of_the_Leydig_cells
Spectrin-associated_autosomal_recessive_cerebellar_ataxia	Rare_neurologic_disease	Progressive_cerebellar_ataxia	Delayed_speech_and_language_development	Intellectual_disability_mild	Dysarthria	Global_developmental_delay	Cerebellar_atrophy	Dysmetria	Hyperreflexia	Slurred_speech	Dysdiadochokinesis	Truncal_ataxia	Progressive_gait_ataxia	Strabismus	Nystagmus	Dysmetric_saccades	Diplopia	Horizontal_nystagmus	Spasticity	Intention_tremor	Jerky_ocular_pursuit_movements
Spinal_muscular_atrophy-Dandy-Walker_malformation-cataracts_syndrome	Rare_neurologic_disease	Cataract	Dandy-Walker_malformation	Cerebellar_vermis_hypoplasia	Enlarged_cisterna_magna	Distal_muscle_weakness	EMG:_chronic_denervation_signs	Distal_lower_limb_amyotrophy
Spinal_muscular_atrophy-progressive_myoclonic_epilepsy_syndrome	Rare_neurologic_disease	Seizures	Myoclonus	Abnormal_lower_motor_neuron_morphology	Functional_motor_deficit	Lower_limb_muscle_weakness	Abnormal_enzyme/coenzyme_activity	Behavioral_abnormality	Tremor	Recurrent_aspiration_pneumonia	Generalized_myoclonic_seizures	Clumsiness	Difficulty_walking	Frequent_falls	Respiratory_insufficiency_due_to_muscle_weakness	Atonic_seizure	Typical_absence_seizure	Sensorineural_hearing_impairment	Mental_deterioration	High-frequency_sensorineural_hearing_impairment	Waddling_gait	Inability_to_walk	Scoliosis	Respiratory_failure	Eyelid_myoclonus	Generalized_tonic-clonic_seizures_without_focal_onset	Myoclonic_status_epilepticus	Limb_myoclonus	Intellectual_disability	Dysphagia	Flexion_contracture	Hepatosplenomegaly	Hoarse_voice	Skin_nodule
Spinocerebellar_ataxia_type_1	Rare_neurologic_disease	Progressive_cerebellar_ataxia	Peripheral_neuropathy	Abnormality_of_eye_movement	Slow_saccadic_eye_movements	Dysarthria	Cerebellar_atrophy	Gait_disturbance	Dystonia	Slurred_speech	Dysphagia	Bradykinesia	Chorea	Memory_impairment	Bulbar_signs	Loss_of_Purkinje_cells_in_the_cerebellar_vermis	Atrophy/Degeneration_affecting_the_brainstem	Abnormality_of_somatosensory_evoked_potentials	Abnormal_flash_visual_evoked_potentials	Upgaze_palsy	Staring_gaze	Inertia	Abnormal_nerve_conduction_velocity	Cognitive_impairment	Ophthalmoparesis	Nystagmus	Optic_atrophy	Hyporeflexia	Generalized_hypotonia	Dysmetria	Dysdiadochokinesis	Gait_imbalance	Postural_tremor	Abnormality_of_brainstem_morphology	Fasciculations	Respiratory_failure	Skeletal_muscle_atrophy	Hyperactive_deep_tendon_reflexes	Hypermetric_saccades	Impaired_proprioception	Abnormality_of_masticatory_muscle
Spinocerebellar_ataxia_type_10	Rare_neurologic_disease	Dysarthria	Gait_ataxia	Progressive_cerebellar_ataxia	Nystagmus	Gaze-evoked_nystagmus	Cerebellar_atrophy	Dysmetria	Dysdiadochokinesis	Intention_tremor	Gait_imbalance	Scanning_speech	Generalized-onset_seizure	Unsteady_gait	Impaired_smooth_pursuit	EEG_with_generalized_epileptiform_discharges	Kinetic_tremor	Dyskinesia	Urinary_urgency	Depressivity	Aggressive_behavior	Apathy	Hyporeflexia	Generalized_hypotonia	Hyperreflexia	Lower_limb_spasticity	Status_epilepticus	Sleep_disturbance	Focal_impaired_awareness_seizure	Babinski_sign	Focal_motor_seizure
Spinocerebellar_ataxia_type_11	Rare_neurologic_disease	Horizontal_nystagmus	Dysarthria	Dysphagia	Progressive_cerebellar_ataxia	Gait_imbalance	Difficulty_walking	Jerky_ocular_pursuit_movements	Vertical_nystagmus	Dystonia	Abnormal_pyramidal_sign	Peripheral_neuropathy
Spinocerebellar_ataxia_type_12	Rare_neurologic_disease	Ataxia	Cerebellar_atrophy	Parkinsonism	Abnormal_cerebellum_morphology	Hyperreflexia	Cerebral_atrophy	Action_tremor	Limb_dysmetria	Tremor_by_anatomical_site	Behavioral_abnormality	Dementia	Gait_disturbance	Bradykinesia	Intention_tremor	Postural_tremor	Unsteady_gait	Hypokinesia	Poor_fine_motor_coordination	Sensorimotor_neuropathy	Abnormal_pyramidal_sign	Cognitive_impairment
Spinocerebellar_ataxia_type_13	Rare_neurologic_disease	Nystagmus	Intellectual_disability_mild	Dysarthria	Global_developmental_delay	Motor_delay	Cerebellar_atrophy	Generalized_hypotonia	Hyperreflexia	Gait_ataxia	Limb_ataxia	Difficulty_walking	Impaired_distal_vibration_sensation	Difficulty_running	Impaired_visuospatial_constructive_cognition	Titubation	Urinary_urgency	Urinary_incontinence	Hearing_impairment	Torticollis	Optic_disc_pallor	Optic_atrophy	Myoclonus	Dysphagia	Postural_instability	Clumsiness	Hyperactive_deep_tendon_reflexes	Jerky_ocular_pursuit_movements	Seizures	Abnormal_facial_shape	Bradykinesia	Short_stature	Upgaze_palsy
Spinocerebellar_ataxia_type_14	Rare_neurologic_disease	Gait_ataxia	Generalized_hypotonia	Limb_ataxia	Progressive_cerebellar_ataxia	Abnormality_of_the_Achilles_tendon	Cerebellar_vermis_atrophy	Gaze-evoked_nystagmus	Saccadic_smooth_pursuit	Dysarthria	Myoclonus	Tremor	Rigidity	Hyporeflexia_of_lower_limbs	Sensory_impairment	Cognitive_impairment
Spinocerebellar_ataxia_type_15/16	Rare_neurologic_disease	Ataxia	Cerebellar_atrophy	Hyperreflexia	Gait_ataxia	Action_tremor	Head_tremor	Upper_limb_postural_tremor	Tremor_by_anatomical_site
Spinocerebellar_ataxia_type_17	Rare_neurologic_disease	Ataxia	Gait_disturbance	Torticollis	Blepharospasm	Behavioral_abnormality	Spasticity	Mental_deterioration	Cerebellar_atrophy	Parkinsonism	Dystonia	Rigidity	Chorea	Neuronal_loss_in_central_nervous_system	Involuntary_movements	Generalized_cerebral_atrophy/hypoplasia	Abnormal_pyramidal_sign	Atrophy/Degeneration_affecting_the_brainstem	Cerebellar_Purkinje_layer_atrophy	Writer's_cramp
Spinocerebellar_ataxia_type_18	Rare_neurologic_disease	Areflexia	Muscle_weakness	Gait_ataxia	Sensory_impairment	Hearing_impairment	Dysarthria	Dysmetria	Pes_cavus	Lower_limb_hyperreflexia	Hyporeflexia_of_lower_limbs	Sensorimotor_neuropathy	Muscle_fibrillation	Nystagmus	Cerebellar_atrophy	Head_tremor	Skeletal_muscle_atrophy	Peripheral_axonal_neuropathy	Titubation
Spinocerebellar_ataxia_type_19/22	Rare_neurologic_disease	Ataxia	Difficulty_walking	Urinary_incontinence	Hyporeflexia	Cerebellar_atrophy	Hyperreflexia	Limb_ataxia	Truncal_ataxia	Postural_instability	Impaired_vibration_sensation_at_ankles	Ophthalmoplegia	Nystagmus	Diplopia	Dysarthria	Slurred_speech	Broad-based_gait	Poor_coordination	Cogwheel_rigidity	Impaired_smooth_pursuit
Spinocerebellar_ataxia_type_2	Rare_neurologic_disease	Progressive_cerebellar_ataxia	Abnormality_of_the_substantia_nigra	Slow_saccadic_eye_movements	Supranuclear_ophthalmoplegia	Nystagmus	Dementia	Dysarthria	Hyporeflexia	Generalized_hypotonia	Dystonia	Gait_ataxia	Chorea	Postural_tremor	Fasciculations	Abnormality_of_the_spinocerebellar_tracts	Muscle_spasm	Olivopontocerebellar_hypoplasia	Spinal_cord_posterior_columns_myelin_loss	Cerebellar_Purkinje_layer_atrophy	Abnormal_cell_morphology	Kinetic_tremor	Ophthalmoparesis	Parkinsonism	Cerebral_cortical_atrophy	Abnormal_cortical_gyration	Hyperactive_deep_tendon_reflexes	Cerebral_white_matter_atrophy
Spinocerebellar_ataxia_type_20	Rare_neurologic_disease	Dysarthria	Cerebellar_atrophy	Dysphonia	Bradykinesia	Cerebral_calcification	Hypermetric_saccades	Laryngeal_dystonia	Tremor_by_anatomical_site	Gaze-evoked_nystagmus	Ataxia	Hyperreflexia	Gait_ataxia	Vertigo	Abnormal_pyramidal_sign	Upper_limb_postural_tremor	Downbeat_nystagmus	Isometric_tremor	Kinetic_tremor	Intention_tremor
Spinocerebellar_ataxia_type_21	Rare_neurologic_disease	Gait_ataxia	Abnormality_of_extrapyramidal_motor_function	Progressive_cerebellar_ataxia	Intermittent_microsaccadic_pursuits	Nystagmus	Behavioral_abnormality	Intellectual_disability	Dysarthria	Tremor	Rigidity	Akinesia	Cerebellar_vermis_atrophy	Dysgraphia	Cognitive_impairment	Diplopia
Spinocerebellar_ataxia_type_23	Rare_neurologic_disease	Hyperreflexia	Gait_ataxia	Limb_ataxia	Progressive_cerebellar_ataxia	Slow_saccadic_eye_movements	Dysarthria	Dysmetria	Babinski_sign	Impaired_distal_vibration_sensation	Impaired_proprioception
Spinocerebellar_ataxia_type_25	Rare_neurologic_disease	Impaired_pain_sensation	Reduced_visual_acuity	Facial_tics	Abnormal_morphology_of_the_cerebellar_cortex	Diffuse_cerebellar_atrophy	Facial_myokymia	Vomiting	Episodic_abdominal_pain	Progressive_cerebellar_ataxia	Urinary_urgency	Strabismus	Nystagmus	Sensory_neuropathy	Pes_cavus	Gait_ataxia	Spastic_dysarthria	Areflexia_of_lower_limbs	Scoliosis	Distal_sensory_impairment	Decreased_number_of_large_peripheral_myelinated_nerve_fibers	EMG:_neuropathic_changes	Babinski_sign	Impaired_distal_tactile_sensation
Spinocerebellar_ataxia_type_26	Rare_neurologic_disease	Impaired_horizontal_smooth_pursuit	Dysarthria	Limb_ataxia	Progressive_cerebellar_ataxia	Progressive_gait_ataxia	Nystagmus	Dysmetric_saccades	Cerebellar_atrophy	Truncal_ataxia	Babinski_sign	Generalized_hyperreflexia	Seizures	Fasciculations	Paralysis	Sensory_impairment
Spinocerebellar_ataxia_type_27	Rare_neurologic_disease	Gaze-evoked_nystagmus	Dysarthria	Tremor	Aggressive_behavior	Gait_disturbance	Pes_cavus	Gait_ataxia	Limb_ataxia	Truncal_ataxia	Memory_impairment	Difficulty_walking	Sensory_axonal_neuropathy	Strabismus	Red-green_dyschromatopsia	Depressivity	Intellectual_disability_mild	Cerebellar_atrophy	Hand_tremor	Akinesia	Dysgraphia
Spinocerebellar_ataxia_type_28	Rare_neurologic_disease	Dysarthria	Gait_ataxia	Limb_ataxia	Lower_limb_hyperreflexia	Ptosis	Slow_saccadic_eye_movements	Ophthalmoparesis	Nystagmus	Babinski_sign	Parkinsonism	Kinetic_tremor	Behavioral_abnormality	Depressivity	Spasticity	Dystonia	Rigidity	Head_tremor	Memory_impairment	Limb_dystonia	Cognitive_impairment
Spinocerebellar_ataxia_type_29	Rare_neurologic_disease	Delayed_speech_and_language_development	Dysarthria	Dysmetria	Gait_ataxia	Intention_tremor	Delayed_gross_motor_development	Delayed_fine_motor_development	Abnormal_saccadic_eye_movements	Nystagmus	Oculomotor_apraxia	Motor_delay	Cerebellar_atrophy	Generalized_hypotonia	Dysdiadochokinesis	Cerebellar_vermis_atrophy	Delayed_social_development	Cognitive_impairment	Ataxia	Global_developmental_delay	Visual_fixation_instability
Spinocerebellar_ataxia_type_3	Rare_neurologic_disease	Proptosis	Progressive_external_ophthalmoplegia	Nystagmus	Diplopia	Delayed_speech_and_language_development	Dysarthria	Dystonia	Hyperreflexia	Abnormality_of_extrapyramidal_motor_function	Progressive_cerebellar_ataxia	Clumsiness	Skeletal_muscle_atrophy	Abnormal_pyramidal_sign	Vocal_cord_paralysis	Vestibular_dysfunction	Abnormality_of_temperature_regulation
Spinocerebellar_ataxia_type_30	Rare_neurologic_disease	Dysarthria	Gait_ataxia	Limb_ataxia	Gaze-evoked_nystagmus	Lower_limb_hyperreflexia	Cerebellar_vermis_atrophy
Spinocerebellar_ataxia_type_31	Rare_neurologic_disease	Dysarthria	Cerebellar_atrophy	Gait_ataxia	Nystagmus	Hyporeflexia	Hearing_impairment	Spasticity	Tremor	Hyperreflexia	Impaired_vibratory_sensation	Hyperactive_deep_tendon_reflexes
Spinocerebellar_ataxia_type_32	Rare_neurologic_disease	Azoospermia	Testicular_atrophy	Cerebellar_atrophy	Progressive_cerebellar_ataxia	Male_infertility	Cognitive_impairment
Spinocerebellar_ataxia_type_35	Rare_neurologic_disease	Progressive_cerebellar_ataxia	Dysarthria	Cerebellar_atrophy	Dysmetria	Hyperreflexia	Gait_ataxia	Limb_ataxia	Intention_tremor	Difficulty_walking	Babinski_sign	Neck_muscle_weakness	Torticollis	Dysmetric_saccades	Intellectual_disability_moderate	Pseudobulbar_paralysis	Ophthalmoplegia	Nystagmus	Peripheral_neuropathy
Spinocerebellar_ataxia_type_36	Rare_neurologic_disease	Hearing_impairment	Ataxia	Dysarthria	Limb_ataxia	Truncal_ataxia	Slow_saccadic_eye_movements	Blurred_vision	Tongue_fasciculations	Dysmetria	Difficulty_walking	Fasciculations	Skeletal_muscle_atrophy	Babinski_sign	Loss_of_Purkinje_cells_in_the_cerebellar_vermis	Tongue_atrophy	Ptosis	Hyperreflexia	Diplopia	Dysphagia	Migraine	Intention_tremor	Vertigo	Head_tremor	Hand_tremor	Bowel_incontinence	Attention_deficit_hyperactivity_disorder	Limb_myoclonus
Spinocerebellar_ataxia_type_37	Rare_neurologic_disease	Abnormal_conjugate_eye_movement	Cogwheel_rigidity	Falls	Sensorineural_hearing_impairment	Horizontal_nystagmus	Gait_disturbance	Myoclonus	Tremor	Dysdiadochokinesis	Truncal_ataxia	Neurological_speech_impairment	Scanning_speech	Limb_dysmetria	Sensory_impairment	Cerebellar_vermis_atrophy	Diffuse_cerebellar_atrophy
Spinocerebellar_ataxia_type_38	Rare_neurologic_disease	Nystagmus	Dysarthria	Gait_ataxia	Difficulty_walking	Slow_saccadic_eye_movements	Cerebellar_atrophy	Sensory_impairment	Peripheral_neuropathy	Distal_muscle_weakness	Behavioral_abnormality	Tremor
Spinocerebellar_ataxia_type_4	Rare_neurologic_disease	Impaired_vibratory_sensation	Absent_Achilles_reflex	Impaired_tactile_sensation	Impaired_proprioception	Ataxia	Dysarthria	Gait_disturbance	Motor_deterioration	Areflexia	Sensory_axonal_neuropathy	Motor_axonal_neuropathy	Peripheral_neuropathy
Spinocerebellar_ataxia_type_40	Rare_neurologic_disease	Vertical_supranuclear_gaze_palsy	Dysarthria	Dysmetria	Hyperreflexia	Gait_ataxia	Dysdiadochokinesis	Intention_tremor	Broad-based_gait	Neurological_speech_impairment	Scanning_speech	Spastic_paraparesis	Unsteady_gait	Functional_motor_deficit	Pontocerebellar_atrophy
Spinocerebellar_ataxia_type_41	Rare_neurologic_disease	Gait_ataxia	Postural_instability	Cerebellar_vermis_atrophy
Spinocerebellar_ataxia_type_42	Rare_neurologic_disease	Dysarthria	Abnormal_cerebellum_morphology	Unsteady_gait	Neurodevelopmental_abnormality	Urinary_urgency	Depressivity	Saccadic_smooth_pursuit	Cerebellar_atrophy	Dysphagia	Spastic_gait	Gait_ataxia	Babinski_sign	Cerebellar_vermis_atrophy	Impaired_vibration_sensation_at_ankles	Gaze-evoked_horizontal_nystagmus	Eyelid_myokymia	Urinary_incontinence	Strabismus	Hypometric_saccades	Nystagmus	Diplopia	Impotence	Vertigo	Resting_tremor	Head_tremor	Alzheimer_disease	Scoliosis	Psoriasiform_dermatitis	Upper_limb_postural_tremor	Atrophy/Degeneration_affecting_the_brainstem	Reduced_brain_N-acetyl_aspartate_level_by_MRS	Hyperintensity_of_cerebral_white_matter_on_MRI
Spinocerebellar_ataxia_type_43	Rare_neurologic_disease	Peripheral_axonal_neuropathy	Distal_upper_limb_muscle_weakness	Distal_lower_limb_muscle_weakness	Hypometric_saccades	Pectus_carinatum	Dysarthria	Hyporeflexia	Areflexia	Pes_cavus	Gait_ataxia	Limb_ataxia	Unsteady_gait	Cogwheel_rigidity	Distal_sensory_impairment	Decreased_number_of_large_peripheral_myelinated_nerve_fibers	Distal_amyotrophy	Sensorimotor_neuropathy	Foot_dorsiflexor_weakness	Pain	Progressive_cerebellar_ataxia	Cerebellar_vermis_atrophy	Dementia
Spinocerebellar_ataxia_type_5	Rare_neurologic_disease	Cerebellar_atrophy	Gait_disturbance	Slurred_speech	Incoordination
Spinocerebellar_ataxia_type_6	Rare_neurologic_disease	Nystagmus	Gait_ataxia	Progressive_cerebellar_ataxia	Intention_tremor	Postural_instability	Incoordination	Unsteady_gait	Gaze-evoked_horizontal_nystagmus	Bradyopsia	Abnormality_of_vision	Diplopia	Hyperreflexia	Dysphagia	Babinski_sign	Vertical_nystagmus	Choking_episodes	Blepharospasm	Dysarthria	Dystonia
Spinocerebellar_ataxia_type_7	Rare_neurologic_disease	Ataxia	Dysarthria	Dysmetria	Hyperreflexia	Cone/cone-rod_dystrophy	Dysphagia	Visual_loss	Ophthalmoparesis	Ophthalmoplegia	Nystagmus	Abnormal_fundus_morphology	Global_developmental_delay	Mental_deterioration	Motor_delay	Cerebellar_atrophy	Neonatal_hypotonia	Muscle_weakness	Failure_to_thrive	Congestive_heart_failure	Cerebral_atrophy	Dysdiadochokinesis	Orofacial_dyskinesia	Sensory_impairment	Babinski_sign	Reduced_visual_acuity	Feeding_difficulties	Restless_legs	Macular_degeneration	Photophobia	Blindness	Psychosis	Hemeralopia
Spinocerebellar_ataxia_type_8	Rare_neurologic_disease	Nystagmus	Impotence	Ataxia	Spasticity	Cerebellar_atrophy	Dystonia	Hyperreflexia	Rigidity	Gait_ataxia	Bradykinesia	Limb_ataxia	Postural_instability	Unsteady_gait	Spastic_dysarthria	Cerebellar_vermis_atrophy	Urinary_incontinence	Facial_grimacing	Depressivity	Dysphagia	Impaired_vibratory_sensation	Aspiration	Impaired_smooth_pursuit	Hypoplasia_of_the_pons
Spinocerebellar_ataxia_with_axonal_neuropathy_type_1	Rare_neurologic_disease	Gaze-evoked_nystagmus	Ataxia	Areflexia	Pes_cavus	Impaired_vibration_sensation_in_the_lower_limbs	Global_brain_atrophy	Spastic_dysarthria	Spinocerebellar_tract_degeneration	Hypoalbuminemia	Hypercholesterolemia	Steppage_gait	Distal_amyotrophy	Cerebellar_vermis_atrophy	Impaired_distal_proprioception	Pain_insensitivity	Sensorimotor_neuropathy	Distal_lower_limb_muscle_weakness	Peripheral_neuropathy	Seizures	Intellectual_disability
Spinocerebellar_ataxia_with_axonal_neuropathy_type_2	Rare_neurologic_disease	Ataxia	Areflexia	Cerebellar_vermis_atrophy	Sensorimotor_neuropathy	Gaze-evoked_nystagmus	Oculomotor_apraxia	Saccadic_smooth_pursuit	Gait_imbalance	Sensory_impairment	Elevated_alpha-fetoprotein	Strabismus	Choreoathetosis	Dystonia	Dysphagia	Postural_tremor	Head_tremor	Urinary_bladder_sphincter_dysfunction	Hypoalbuminemia	Hypercholesterolemia	Elevated_serum_creatine_kinase	Babinski_sign	Abnormal_pyramidal_sign
Spontaneous_periodic_hypothermia	Rare_neurologic_disease	Hyperhidrosis	Pallor	Skin_rash	Seizures	Ataxia	Gait_disturbance	Tremor	Diarrhea	Nausea_and_vomiting	Hypothermia	Sleep_disturbance	Abnormal_pattern_of_respiration	Reduced_consciousness/confusion	Aplasia/Hypoplasia_of_the_corpus_callosum	Arrhythmia	Fatigue
Sporadic_adult-onset_ataxia_of_unknown_etiology	Rare_neurologic_disease	Abnormality_of_eye_movement	Ataxia	Gait_ataxia	Visual_loss	Macular_degeneration	Gaze-evoked_nystagmus	Memory_impairment	Dysautonomia	Abnormal_vestibulo-ocular_reflex	Impaired_smooth_pursuit	Cerebellar_cortical_atrophy	Hypomimic_face	Sensory_neuropathy	Spasticity	Dysarthria	Abnormal_cranial_nerve_morphology	Parkinsonism	Hyperreflexia	Dysphagia	Rigidity	Dysdiadochokinesis	Akinesia	Resting_tremor	Shuffling_gait	Babinski_sign	Urinary_incontinence	Dementia	Intention_tremor
Sporadic_Creutzfeldt-Jakob_disease	Rare_neurologic_disease	Dementia	Neuronal_loss_in_central_nervous_system	Cerebral_cortex_with_spongiform_changes	Akinetic_mutism	Hyperintensity_of_cerebral_white_matter_on_MRI	Behavioral_abnormality	Ataxia	Confusion	Myoclonus	Cerebral_atrophy	Recurrent_aspiration_pneumonia	Gliosis	Memory_impairment	Visual_hallucinations	Astrocytosis	Hypsarrhythmia	Recurrent_infections	Increased_CSF_protein	Respiratory_failure_requiring_assisted_ventilation	Cognitive_impairment	Sepsis	Visual_impairment	Spasticity	Abnormality_of_extrapyramidal_motor_function	Upper_motor_neuron_dysfunction	Babinski_sign	Hyperactive_deep_tendon_reflexes	Abnormal_pyramidal_sign
SSR4-CDG	Rare_neurologic_disease	Abnormality_of_the_coagulation_cascade	Microcephaly	Intellectual_disability	Global_developmental_delay	Generalized_hypotonia	Abnormal_facial_shape	Wide_mouth	Macrotia	Strabismus	Deeply_set_eye	Widely_spaced_teeth	Failure_to_thrive	Vomiting	Gastroesophageal_reflux	Abnormality_of_the_gastrointestinal_tract	Abnormality_of_upper_lip_vermillion	Feeding_difficulties	Seizures	Horseshoe_kidney	Abnormality_of_the_skeletal_system	Absent_septum_pellucidum	Joint_dislocation	Abnormality_of_the_cardiovascular_system	Abnormality_of_coagulation	Hypoplasia_of_the_corpus_callosum	Abnormality_of_the_periventricular_white_matter	Scoliosis	Patent_ductus_arteriosus
Steinert_myotonic_dystrophy	Rare_neurologic_disease	Muscle_weakness	Excessive_daytime_somnolence	Distal_muscle_weakness	Myotonia_with_warm-up_phenomenon	Posterior_subcapsular_cataract	Cardiac_conduction_abnormality	EMG:_myotonic_discharges	Behavioral_abnormality	Gait_disturbance	Abnormal_rapid_eye_movement_sleep	Obstructive_sleep_apnea	Myalgia	Atrial_fibrillation	Prolonged_QRS_complex	Poor_fine_motor_coordination	Foot_dorsiflexor_weakness	Prolonged_PR_interval	Fatigue	Fatigable_weakness_of_bulbar_muscles	Weakness_of_facial_musculature	Impairment_in_personality_functioning	Cognitive_impairment	Hypersomnia	Abnormality_of_masticatory_muscle	Male_hypogonadism	Testicular_atrophy	Decreased_fertility	Neck_muscle_weakness	Astigmatism	Hypermetropia	Ophthalmoplegia	Depressivity	Autistic_behavior	Short_attention_span	Anxiety	Impotence	Hypergonadotropic_hypogonadism	Diabetes_mellitus	Hyperinsulinemia	Insulin_resistance	Secondary_hyperparathyroidism	Cholelithiasis	Intellectual_disability_mild	Dysarthria	Global_developmental_delay	Mental_deterioration	Neonatal_hypotonia	Specific_learning_disability
Steroid-responsive_encephalopathy_associated_with_autoimmune_thyroiditis	Rare_neurologic_disease	Acute_encephalopathy	Hashimoto_thyroiditis	Cerebral_vasculitis	Hypothyroidism	Goiter	Confusion	Abnormality_of_the_cerebral_white_matter	Hyponatremia	Paralysis	Psychosis	Depressivity	Anxiety	Thrombocytopenia	Fever	Leukocytosis	Nausea_and_vomiting	Status_epilepticus	Generalized-onset_seizure	Headache	Dysautonomia	Immunodeficiency	Involuntary_jerking_movements	Focal-onset_seizure	Limited_neck_flexion	Cerebral_edema
Stiff_person_spectrum_disorder	Rare_neurologic_disease	Anxiety	Hyperhidrosis	Falls	EMG_abnormality	Intermittent_painful_muscle_spasms	Emotional_lability	Agoraphobia	Rigidity	Exaggerated_startle_response	Difficulty_walking	Paraspinal_muscle_hypertrophy	Autoimmune_antibody_positivity	Diabetes_mellitus	Hypothyroidism	Lumbar_hyperlordosis	Abnormality_of_the_nervous_system
STT3A-CDG	Rare_neurologic_disease	Microcephaly	Intellectual_disability	Seizures	Global_developmental_delay	Cerebellar_atrophy	Generalized_hypotonia	Failure_to_thrive	Feeding_difficulties	Abnormal_glycosylation	Cryptorchidism	Scrotal_hypoplasia	Micropenis	Impaired_smooth_pursuit
STT3B-CDG	Rare_neurologic_disease	Microcephaly	Intellectual_disability	Seizures	Global_developmental_delay	Cerebellar_atrophy	Generalized_hypotonia	Failure_to_thrive	Feeding_difficulties	Abnormal_glycosylation	Cryptorchidism	Scrotal_hypoplasia	Micropenis	Abnormality_of_the_genital_system	Optic_atrophy	Intrauterine_growth_retardation	Thrombocytopenia	Respiratory_distress
Subacute_inflammatory_demyelinating_polyneuropathy	Rare_neurologic_disease	Decreased_nerve_conduction_velocity	Muscle_weakness	Increased_CSF_protein	Decreased_motor_nerve_conduction_velocity	Abnormality_of_somatosensory_evoked_potentials	Areflexia	Gait_disturbance	Leukocytosis	Difficulty_walking	Frequent_falls	Axonal_loss	Sensory_impairment	Difficulty_climbing_stairs	Elevated_erythrocyte_sedimentation_rate	Functional_motor_deficit	Diffuse_peripheral_demyelination	Decreased_amplitude_of_sensory_action_potentials	Sensorimotor_neuropathy	Demyelinating_motor_neuropathy	Symmetric_peripheral_demyelination	Peripheral_demyelination	Pain	Choreoathetosis	Tremor	Abnormality_of_the_calf_musculature	Positive_Romberg_sign	Distal_muscle_weakness	Distal_sensory_impairment	Increased_circulating_IgG_level	Steppage_gait	Decreased_sensory_nerve_conduction_velocity	Limited_elbow_flexion	Absent_patellar_reflexes	Decreased_distal_sensory_nerve_action_potential	Limited_hip_movement	Limitation_of_movement_at_ankles	Motor_conduction_block	Severe_infection	Abnormality_of_the_respiratory_system	Abnormality_of_the_autonomic_nervous_system	Cranial_nerve_paralysis
SUNCT_syndrome	Rare_neurologic_disease	Epiphora	Conjunctival_hyperemia	Episodic_pain	Ptosis	Restlessness	Agitation	Hyperhidrosis	Episodic_hyperhidrosis	Migraine	Flushing	Rhinorrhea	Increased_tear_production	Trigeminal_neuralgia	Facial_edema	Photophobia	Miosis	Facial_erythema	Nasal_obstruction	Nausea	Ear_pain	Jaw_pain	Palpebral_edema	Vomiting
Superficial_siderosis	Rare_neurologic_disease	Ataxia	Bilateral_sensorineural_hearing_impairment	Abnormality_of_the_vestibulocochlear_nerve	Cerebellar_atrophy	Abnormal_corpus_callosum_morphology	Abnormal_bleeding	Progressive_gait_ataxia	Lower_limb_muscle_weakness	Internal_hemorrhage	Cognitive_impairment	Functional_abnormality_of_the_bladder	Anosmia	Dementia	Dysarthria	Dysmetria	Slurred_speech	Persistent_bleeding_after_trauma	Vomiting	Nausea	Limb_ataxia	Dysdiadochokinesis	Subarachnoid_hemorrhage	Abnormality_of_the_spinal_cord	Headache	Unsteady_gait	Vertigo	Abnormality_of_the_cerebellar_vermis	Memory_impairment	Frequent_falls	Abnormality_of_the_cerebrospinal_fluid	Increased_CSF_protein	Paresthesia	Back_pain	Babinski_sign	Difficulty_standing	Atrophy_of_the_spinal_cord	Abnormal_pyramidal_sign	Impaired_pain_sensation	Atrophy/Degeneration_affecting_the_brainstem	Anisocoria	Partial_anosmia	Impaired_temperature_sensation	Dysgyria	Neoplasm_of_the_central_nervous_system	Arteriovenous_malformation	Enlarged_sylvian_cistern	Seizures	Abnormal_vertebral_artery_morphology
Sydenham_chorea	Rare_neurologic_disease	Movement_abnormality_of_the_tongue	Facial_grimacing	Behavioral_abnormality	Emotional_lability	Inappropriate_behavior	Obsessive-compulsive_behavior	Irritability	Dysarthria	Generalized_hypotonia	Chorea	Headache	Unsteady_gait	Hemiballismus	Septic_arthritis	Recurrent_streptococcus_pneumoniae_infections	Erythema	Endocarditis
Symmetrical_thalamic_calcifications	Rare_neurologic_disease	Ataxia	Spasticity	Hypertonia	Reduced_tendon_reflexes	Weak_cry	Respiratory_insufficiency	EEG_abnormality	Cerebral_calcification	Cognitive_impairment	Microcephaly	Seizures	Failure_to_thrive	Polyhydramnios	Abnormality_of_the_voice	Abnormality_of_neuronal_migration	Arrhythmia
Symptomatic_form_of_muscular_dystrophy_of_Duchenne_and_Becker_in_female_carriers	Rare_neurologic_disease	Lumbar_hyperlordosis	Elevated_serum_creatine_kinase	Proximal_muscle_weakness	Abnormality_of_the_shoulder_girdle_musculature	Dilated_cardiomyopathy	Left_ventricular_hypertrophy	Inability_to_walk	Thoracic_kyphosis	Thoracic_scoliosis	Generalized_muscle_weakness	Myalgia	Muscle_spasm	Exercise-induced_muscle_cramps	Quadriceps_muscle_weakness	Calf_muscle_hypertrophy	Absent_muscle_dystrophin_expression	Congestive_heart_failure	Elbow_flexion_contracture	Fasciculations	Distal_sensory_impairment_of_all_modalities
Synaptic_congenital_myasthenic_syndromes	Rare_neurologic_disease	Generalized_muscle_weakness	EMG:_decremental_response_of_compound_muscle_action_potential_to_repetitive_nerve_stimulation	Proximal_muscle_weakness	Neck_muscle_weakness	Ptosis	Ophthalmoparesis	Muscular_hypotonia	Global_developmental_delay	Hyporeflexia	Bilateral_ptosis	Weak_cry	Dysphagia	Poor_suck	Respiratory_insufficiency	Respiratory_distress	Poor_head_control	Distal_muscle_weakness	Waddling_gait	Myopathy	Abnormal_synaptic_transmission_at_the_neuromuscular_junction	Prolonged_miniature_endplate_currents	Decreased_size_of_nerve_terminals	Scapular_winging	Facial_palsy	Abnormal_enzyme/coenzyme_activity	Unfavorable_response_of_muscle_weakness_to_acetylcholine_esterase_inhibitors	High_palate	Intellectual_disability	Areflexia	Muscle_weakness	Neonatal_respiratory_distress	Scoliosis	Recurrent_lower_respiratory_tract_infections	Hypoventilation	Abnormality_of_the_knee	Skeletal_muscle_atrophy	Axial_muscle_weakness	Easy_fatigability	Type_1_muscle_fiber_predominance	Impaired_mastication	Limited_extraocular_movements	Sleep_apnea	Slow_pupillary_light_response	Triangular_mouth	Mandibular_prognathia	Right_ventricular_hypertrophy	Talipes_equinovarus	Abnormal_facial_shape
SYNGAP1-related_developmental_and_epileptic_encephalopathy	Rare_neurologic_disease	Delayed_speech_and_language_development	Intellectual_disability	Global_developmental_delay	Generalized-onset_seizure	Abnormality_of_pain_sensation	Behavioral_abnormality	Autistic_behavior	Ataxia	Muscular_hypotonia	Gait_disturbance	Abnormal_facial_shape	Intellectual_disability_moderate	Sleep_disturbance	Poor_coordination	Developmental_regression	Poor_speech	Intellectual_disability_severe	Eating-induced_seizure	Abnormal_eating_behavior	Hypospadias	Wide_mouth	Narrow_mouth	High_palate	Thin_vermilion_border	Microcephaly	Long_face	Triangular_face	Macrotia	Deeply_set_eye	Impaired_social_interactions	Cutaneous_photosensitivity	Tremor	Absent_speech	Obsessive-compulsive_trait	Feeding_difficulties_in_infancy	Myoclonic_absence	Abnormal_subarachnoid_space_morphology	Abnormal_tongue_physiology	Anteverted_ears	Recurrent_hand_flapping	Postaxial_polydactyly
Thomsen_and_Becker_disease	Rare_neurologic_disease	Myotonia	EMG_abnormality
Thyrotoxic_periodic_paralysis	Rare_neurologic_disease	Hyperthyroidism	Periodic_hypokalemic_paresis	Episodic_hypokalemia	Hyperhidrosis	Obesity	Palpitations	Tetraplegia	Hypomagnesemia	EMG_abnormality	Paralysis	Episodic_flaccid_weakness	Abnormal_muscle_fiber_morphology	Lower_limb_muscle_weakness	Mildly_elevated_creatine_kinase	Transient_hypophosphatemia	Thyrotoxicosis_with_diffuse_goiter	Thyrotoxicosis_with_toxic_multinodular_goitre	Thyrotoxicosis_with_toxic_single_thyroid_nodule	Increased_intramyocellular_lipid_droplets	Decreased_urinary_potassium	Graves_disease	Urinary_retention	Hyporeflexia	Tremor	Weight_loss	Constipation	Rhabdomyolysis	Muscle_spasm	Muscle_stiffness	Exercise-induced_muscle_fatigue	Postprandial_hyperglycemia	Prolonged_QT_interval	Ventricular_fibrillation	Late-onset_proximal_muscle_weakness	Shortened_PR_interval	Second_degree_atrioventricular_block	Ophthalmoparesis	Hyperkalemia	Respiratory_paralysis	Myotonia	Abnormality_of_peripheral_nerve_conduction	Impaired_myocardial_contractility
Tibial_muscular_dystrophy	Rare_neurologic_disease	Difficulty_walking	Myopathy	Steppage_gait	EMG:_myopathic_abnormalities	Increased_variability_in_muscle_fiber_diameter	Centrally_nucleated_skeletal_muscle_fibers	Rimmed_vacuoles	Mildly_elevated_creatine_kinase	Foot_dorsiflexor_weakness	Peroneal_muscle_atrophy	Increased_muscle_lipid_content	Ankle_weakness	Clumsiness	Quadriceps_muscle_weakness	Proximal_muscle_weakness_in_lower_limbs	Distal_upper_limb_muscle_weakness	Cardiomyopathy	Respiratory_failure	Weakness_of_long_finger_extensor_muscles
Tremor-ataxia-central_hypomyelination_syndrome	Rare_neurologic_disease	Hypogonadotrophic_hypogonadism	Vertical_supranuclear_gaze_palsy	Myopia	Abnormality_of_ocular_smooth_pursuit	Nystagmus	Hypodontia	Oligodontia	Delayed_eruption_of_teeth	Delayed_puberty	Ataxia	Intellectual_disability_mild	Spasticity	Global_developmental_delay	Dysmetria	Cerebellar_hypoplasia	Dystonia	Hyperreflexia	Dysphagia	Hypoplasia_of_the_corpus_callosum	Intention_tremor	Abnormality_of_the_basal_ganglia	Postural_tremor	Clumsiness	Developmental_regression	Positive_Romberg_sign	Leukodystrophy	Spastic_dysarthria	Upper_motor_neuron_dysfunction	CNS_hypomyelination	Babinski_sign	Short_stature	Autonomic_bladder_dysfunction	High_myoinositol_in_brain_by_MRS	Optic_atrophy	Cerebral_cortical_atrophy	Impaired_vibration_sensation_in_the_lower_limbs	Drooling	Impaired_distal_proprioception	Peripheral_neuropathy	Deeply_set_eye	Focal_seizures_afebril
Tremor-nystagmus-duodenal_ulcer_syndrome	Rare_neurologic_disease	Nystagmus	Duodenal_ulcer	Abnormality_of_movement	Ataxia
Trigeminal_neuralgia	Rare_neurologic_disease	Trigeminal_neuralgia	Depressivity	Cluster_headache	Allodynia	Difficulty_in_tongue_movements	Episodic_paroxysmal_anxiety	Poor_speech	Paresthesia	Sensory_impairment	Vascular_tortuosity	Feeding_difficulties	Mandibular_pain	Cranial_nerve_compression	Neoplasm	CNS_demyelination	Peripheral_demyelination	Ocular_pain
Tubular_aggregate_myopathy	Rare_neurologic_disease	Myalgia	Muscle_spasm	EMG:_myopathic_abnormalities	Fatigable_weakness	Fatiguable_weakness_of_proximal_limb_muscles	Muscle_fiber_tubular_inclusions	Increased_variability_in_muscle_fiber_diameter	Centrally_nucleated_skeletal_muscle_fibers	Type_2_muscle_fiber_atrophy
Typical_nemaline_myopathy	Rare_neurologic_disease	High_palate	Hyporeflexia	Gait_disturbance	Neonatal_hypotonia	Respiratory_insufficiency	Limb-girdle_muscle_weakness	Axial_muscle_weakness	Increased_variability_in_muscle_fiber_diameter	Neck_flexor_weakness	Type_1_muscle_fiber_predominance	Foot_dorsiflexor_weakness	Facial_palsy	Fatigable_weakness_of_distal_limb_muscles	Narrow_face	Micrognathia	Short_neck	Ptosis	Pectus_excavatum	Narrow_chest	Facial_diplegia	Flexion_contracture	Polyhydramnios	Hypokinesia	Waddling_gait	Scoliosis	Arthrogryposis_multiplex_congenita	Hip_dislocation	Genu_valgum	Nocturnal_hypoventilation	Genu_varum	Myopathy	Elevated_serum_creatine_kinase	Spinal_rigidity	Hyperlordosis	Nemaline_bodies	Feeding_difficulties	Fatigable_weakness_of_respiratory_muscles	Fatiguable_weakness_of_proximal_limb_muscles	Kyphosis
Urocanic_aciduria	Rare_neurologic_disease	Ataxia	Dysarthria	Gait_ataxia	Truncal_ataxia	Broad-based_gait	Action_tremor	Recurrent_infections	Hyperactive_deep_tendon_reflexes	Gaze-evoked_horizontal_nystagmus	Abnormal_circulating_histidine_concentration	Urocanic_aciduria
Vacuolar_myopathy_with_sarcoplasmic_reticulum_protein_aggregates	Rare_neurologic_disease	Myopathy	Elevated_serum_creatine_kinase
Vocal_cord_and_pharyngeal_distal_myopathy	Rare_neurologic_disease	Dysarthria	Bulbar_palsy	Hyperreflexia	Abnormality_of_the_calf_musculature	Vocal_cord_paresis	Hoarse_voice	Nasal_speech	Weak_voice	Dysphagia	Unsteady_gait	Difficulty_walking	Distal_muscle_weakness	Respiratory_insufficiency_due_to_muscle_weakness	Aspiration	EMG_abnormality	Exercise-induced_myalgia	Rimmed_vacuoles	Imperfect_vocal_cord_adduction	Amyotrophic_lateral_sclerosis	Mildly_elevated_creatine_kinase	Bowing_of_the_vocal_cords	Ankle_weakness	Abnormal_morphology_of_musculature_of_pharynx	Shoulder_girdle_muscle_weakness	Distal_upper_limb_amyotrophy	Abnormality_of_the_extraocular_muscles	Dementia	Decreased_nerve_conduction_velocity	Distal_sensory_impairment	Inflammatory_myopathy
Vogt-Koyanagi-Harada_disease	Rare_neurologic_disease	Abnormal_eyelash_morphology	Glaucoma	Visual_impairment	Cataract	Abnormal_eyebrow_morphology	Retinal_detachment	Sensorineural_hearing_impairment	Vitiligo	Hypopigmented_skin_patches	Sparse_scalp_hair	Premature_graying_of_hair	Poliosis	Short_stature	Cognitive_impairment
VPS11-related_autosomal_recessive_hypomyelinating_leukodystrophy	Rare_neurologic_disease	Microcephaly	Intellectual_disability	Seizures	Global_developmental_delay	Central_hypotonia	Cerebral_visual_impairment	Neurogenic_bladder	Sensorineural_hearing_impairment	Optic_atrophy	Spasticity	Absent_speech	Growth_delay	Constipation	Hypoplasia_of_the_corpus_callosum	Ventriculomegaly	Delayed_CNS_myelination	Febrile_seizures	Dysautonomia	Poor_speech	Abnormality_of_the_periventricular_white_matter	Multiple_joint_contractures	Diffuse_white_matter_abnormalities	Oromotor_apraxia	Cerebellar_atrophy	Coarse_facial_features	Hepatosplenomegaly
Worster-Drought_syndrome	Rare_neurologic_disease	Microcephaly	Sensorineural_hearing_impairment	Seizures	Abnormal_cranial_nerve_morphology	Hyperreflexia	Neurological_speech_impairment	Tetraplegia	Cognitive_impairment
X-linked_centronuclear_myopathy	Rare_neurologic_disease	Type_1_fibers_relatively_smaller_than_type_2_fibers	Low_APGAR_score	Abnormality_of_the_eye	Neonatal_hypotonia	Decreased_fetal_movement	Polyhydramnios	Premature_birth	Poor_suck	Pneumonia	Respiratory_distress	Recurrent_respiratory_infections	Centrally_nucleated_skeletal_muscle_fibers	Respiratory_failure_requiring_assisted_ventilation	Severe_muscular_hypotonia	Feeding_difficulties_in_infancy	Fatigable_weakness_of_bulbar_muscles	Fatigable_weakness_of_swallowing_muscles	Weakness_of_facial_musculature	Necklace_skeletal_muscle_fibers	High_palate	Dolichocephaly	Long_face	Abnormal_facial_shape	Inability_to_walk
X-linked_Charcot-Marie-Tooth_disease_type_1	Rare_neurologic_disease	Sensory_neuropathy	Areflexia	Pes_cavus	Distal_upper_limb_amyotrophy	Distal_lower_limb_amyotrophy	Abnormal_nerve_conduction_velocity	Impaired_pain_sensation	Hearing_impairment	Ataxia	Dysarthria	Excessive_daytime_somnolence	Gait_disturbance	Tremor	Language_impairment	Scoliosis	Kyphosis
X-linked_Charcot-Marie-Tooth_disease_type_2	Rare_neurologic_disease	Areflexia	Gait_disturbance	Pes_cavus	Hand_tremor	Distal_sensory_impairment	Steppage_gait	Decreased_motor_nerve_conduction_velocity	EMG:_chronic_denervation_signs	Distal_lower_limb_amyotrophy	Intrinsic_hand_muscle_atrophy	Foot_dorsiflexor_weakness	Distal_lower_limb_muscle_weakness	Tibialis_atrophy	Peroneal_muscle_weakness	Hand_muscle_weakness	Sensorineural_hearing_impairment	Optic_disc_pallor	Optic_neuropathy	Intellectual_disability	Hyporeflexia	Hyperreflexia	Spastic_paraparesis	Babinski_sign	Hyperactive_deep_tendon_reflexes	Slow_decrease_in_visual_acuity	Clasp-knife_sign
X-linked_Charcot-Marie-Tooth_disease_type_3	Rare_neurologic_disease	Motor_delay	Areflexia	Gait_disturbance	Abnormality_of_the_foot	Pes_cavus	Difficulty_walking	Decreased_motor_nerve_conduction_velocity	Sensory_impairment	Distal_amyotrophy	Sensorimotor_neuropathy	Equinovarus_deformity	Distal_lower_limb_amyotrophy	Intrinsic_hand_muscle_atrophy	Foot_dorsiflexor_weakness	Progressive_distal_muscle_weakness	Hand_muscle_weakness	Delayed_ability_to_walk	Hyporeflexia	Tremor	Hip_dysplasia	Restrictive_ventilatory_defect	Spastic_paraparesis	Inability_to_walk	Scoliosis	Peripheral_axonal_neuropathy	Demyelinating_peripheral_neuropathy	Distal_upper_limb_amyotrophy	Pes_valgus	Proximal_muscle_weakness_in_lower_limbs
X-linked_Charcot-Marie-Tooth_disease_type_4	Rare_neurologic_disease	Hearing_impairment	Decreased_nerve_conduction_velocity	Sensory_neuropathy	Intellectual_disability	Ataxia	Areflexia	Gait_disturbance	Tremor	Pes_cavus	Sleep_disturbance	Distal_muscle_weakness	Scoliosis	Kyphosis	Skeletal_muscle_atrophy	Sensorimotor_neuropathy	Impaired_pain_sensation
X-linked_Charcot-Marie-Tooth_disease_type_6	Rare_neurologic_disease	Decreased_nerve_conduction_velocity	Pes_cavus	Difficulty_walking	Hand_tremor	Distal_sensory_impairment	Absent_Achilles_reflex	EMG:_axonal_abnormality	Sensorimotor_neuropathy	Lower_limb_muscle_weakness	Distal_lower_limb_amyotrophy	Impaired_vibration_sensation_in_the_lower_limbs	Elevated_serum_creatine_kinase	Steppage_gait	Thenar_muscle_atrophy	Sensorineural_hearing_impairment	Motor_delay
X-linked_dystonia-parkinsonism	Rare_neurologic_disease	Blepharospasm	Torsion_dystonia	Myoclonus	Bradykinesia	Chorea	Postural_instability	Resting_tremor	Shuffling_gait	Hand_tremor	Parkinsonism_with_favorable_response_to_dopaminergic_medication	Focal_dystonia	Progressive_extrapyramidal_muscular_rigidity	Difficulty_walking	Frequent_falls	Limb_dystonia	Laryngeal_stridor	Protruding_tongue	Aspiration_pneumonia	Impaired_oropharyngeal_swallow_response
X-linked_Emery-Dreifuss_muscular_dystrophy	Rare_neurologic_disease	Pectus_excavatum	Reduced_tendon_reflexes	Joint_stiffness	Myotonia	Myopathy	Elevated_serum_creatine_kinase	Limb-girdle_muscular_dystrophy	Short_neck	Sprengel_anomaly	Gait_disturbance	Hypertrophic_cardiomyopathy	Hypertriglyceridemia	Waddling_gait	Increased_LDL_cholesterol_concentration	Spinal_rigidity	Back_pain	EMG:_myopathic_abnormalities	Scapular_winging	Rimmed_vacuoles	Decreased_cervical_spine_flexion_due_to_contractures_of_posterior_cervical_muscles	Proximal_upper_limb_amyotrophy	Proximal_lower_limb_amyotrophy	Proximal_muscle_weakness_in_lower_limbs	Proximal_muscle_weakness_in_upper_limbs	Type_1_muscle_fiber_atrophy	Absent_muscle_fiber_emerin	Toe_walking	Ptosis	Muscular_hypotonia	Obesity	Atrioventricular_block	Achilles_tendon_contracture	Scoliosis	Kyphosis	Elbow_flexion_contracture	Hyperlordosis	Supraventricular_arrhythmia	Ichthyosis	Lipodystrophy	Vocal_cord_paralysis	Sudden_cardiac_death	Respiratory_insufficiency_due_to_muscle_weakness	Ventricular_escape_rhythm	Intellectual_disability
X-linked_immunoneurologic_disorder	Rare_neurologic_disease	Functional_abnormality_of_the_bladder	Nystagmus	Nyctalopia	Hypertonia	Hyperreflexia	Recurrent_respiratory_infections	Hemiplegia/hemiparesis	Immunoglobulin_IgG2_deficiency	Abnormality_of_nervous_system_physiology	Cataract	Abnormality_of_the_pleura	Myopathy
X-linked_intellectual_disability_Abidi_type	Rare_neurologic_disease	Cleft_palate	Microcephaly	Sloping_forehead	Hearing_impairment	Protruding_ear	Prominent_nasal_bridge	Pectus_excavatum	Intellectual_disability	Scoliosis	Short_stature	Decreased_testicular_size	Non-midline_cleft_lip
X-linked_intellectual_disability_Armfield_type	Rare_neurologic_disease	Inguinal_hernia	Cryptorchidism	Wide_mouth	Cleft_palate	Brachycephaly	Macrocephaly	Epicanthus	Mandibular_prognathia	Short_philtrum	Broad_forehead	Micrognathia	Macrotia	Strabismus	Downslanted_palpebral_fissures	Glaucoma	Cataract	Facial_capillary_hemangioma	Seizures	Global_developmental_delay	Limited_elbow_extension	Patent_ductus_arteriosus	Abnormal_cardiac_septum_morphology	Short_foot	Organic_aciduria	Cerebral_cortical_atrophy	Intellectual_disability_moderate	Downturned_corners_of_mouth	Aminoaciduria	Short_stature	Depressed_nasal_bridge	Capillary_hemangioma	Nevus_flammeus_of_the_forehead	Abnormality_of_the_elbow	Intellectual_disability_severe	Midface_retrusion	Galactosuria	Small_hand	Long_ear
X-linked_intellectual_disability_Cabezas_type	Rare_neurologic_disease	Inguinal_hernia	Wide_mouth	Short_philtrum	Abnormality_of_earlobe	Prominent_nose	Short_neck	Downslanted_palpebral_fissures	Synophrys	Hyperactivity	Absent_speech	Neurological_speech_impairment	Intellectual_disability_moderate	Clinodactyly_of_the_5th_finger	Short_palm	Hypoplasia_of_penis	Abnormal_hair_pattern	Open_bite	Intellectual_disability_severe	Down-sloping_shoulders	Small_hand	Thick_lower_lip_vermilion	High_palate	Macrocephaly	Blepharophimosis	Aggressive_behavior	Tremor	Obesity	Pes_cavus	Short_foot	Sandal_gap	Broad-based_gait	Scoliosis	Short_stature	Cachexia	Decreased_testicular_size	Hypogonadism	Microcephaly	Epicanthus	Acanthosis_nigricans	Hyperhidrosis	Seizures	Toe_syndactyly	EEG_abnormality	Immunodeficiency	Kyphosis	Cubitus_valgus	Biparietal_narrowing	Joint_hyperflexibility
X-linked_intellectual_disability_Cantagrel_type	Rare_neurologic_disease	Shawl_scrotum	Short_philtrum	Esotropia	Autistic_behavior	Stereotypy	Intellectual_disability	Seizures	Neonatal_hypotonia	Absent_speech	Gastroesophageal_reflux	Hypoplasia_of_the_corpus_callosum	Ventriculomegaly	Cerebral_cortical_atrophy	Tetraparesis	Abnormality_of_the_musculature	Short_nose	Tented_upper_lip_vermilion	Severe_global_developmental_delay
X-linked_intellectual_disability_Cilliers_type	Rare_neurologic_disease	Male_hypogonadism	Cryptorchidism	Hypospadias	Microcephaly	Prominent_supraorbital_ridges	Macrotia	Prominent_nasal_bridge	Deeply_set_eye	Psychosis	Hypergonadotropic_hypogonadism	Increased_circulating_gonadotropin_level	Delayed_skeletal_maturation	Clinodactyly_of_the_5th_finger	Intellectual_disability_mild	Failure_to_thrive	Short_stature	Small_nail	Abnormal_facial_shape	Absence_of_secondary_sex_characteristics	Decreased_testicular_size	Coronal_craniosynostosis	Paranoia	Decreased_serum_testosterone_level	Shyness	Small_hand
X-linked_intellectual_disability_Golabi-Ito-Hall_type	Rare_neurologic_disease	Macroglossia	Microcephaly	Narrow_face	Long_face	Epicanthus	Triangular_face	Cupped_ear	Protruding_ear	Upslanted_palpebral_fissure	Intellectual_disability	Seizures	Spasticity	Spastic_diplegia	Growth_delay	Atrial_septal_defect	Brittle_hair	Short_stature	Nail_dystrophy	Dry_hair
X-linked_intellectual_disability_Hedera_type	Rare_neurologic_disease	Intellectual_disability	Generalized_tonic-clonic_seizures	Delayed_speech_and_language_development	Motor_delay	Unsteady_gait	Hyporeflexia_of_lower_limbs	Extrapyramidal_muscular_rigidity	Atonic_seizure	Hyporeflexia_of_upper_limbs	Hypomimic_face	Cerebellar_atrophy	Gait_disturbance	Dysmetria	Slurred_speech	Obesity	Weak_voice	Left_ventricular_hypertrophy	Pes_planus	Calcaneovalgus_deformity	Hypoplasia_of_the_corpus_callosum	Apraxia	Drooling	Action_tremor	Frequent_falls	Inability_to_walk	Scoliosis	Absent_Achilles_reflex	Babinski_sign	Astereognosia	Echolalia	Agraphesthesia
X-linked_intellectual_disability_Miles-Carpenter_type	Rare_neurologic_disease	Hypogonadism	Facial_asymmetry	Microcornea	Exotropia	Rocker_bottom_foot	Skeletal_muscle_atrophy	Joint_hyperflexibility	Abnormal_dermatoglyphics	Intellectual_disability_severe
X-linked_intellectual_disability_Najm_type	Rare_neurologic_disease	Microcephaly	Hypertelorism	Broad_forehead	Long_philtrum	Micrognathia	Macrotia	Sensorineural_hearing_impairment	Wide_nasal_bridge	Strabismus	Visual_impairment	Cataract	Myopia	Chorioretinal_coloboma	Optic_nerve_hypoplasia	Nystagmus	Optic_atrophy	Seizures	Spasticity	Gait_disturbance	Cerebellar_hypoplasia	Absent_speech	Failure_to_thrive	Rigidity	Cerebral_cortical_atrophy	Intellectual_disability_moderate	Scoliosis	Severe_global_developmental_delay
X-linked_intellectual_disability_Nascimento_type	Rare_neurologic_disease	Wide_mouth	Dry_skin	Delayed_gross_motor_development	Poor_speech	Low_hanging_columella	Micropenis	Vesicoureteral_reflux	Thin_vermilion_border	Macrocephaly	Hypertelorism	Broad_neck	Upslanted_palpebral_fissure	Synophrys	Aggressive_behavior	Seizures	Ventricular_septal_defect	Pes_cavus	Short_foot	Low_posterior_hairline	Generalized_hirsutism	Abnormality_of_the_cerebral_white_matter	Downturned_corners_of_mouth	Neonatal_hyperbilirubinemia	Depressed_nasal_bridge	Wide_intermamillary_distance	Hypointensity_of_cerebral_white_matter_on_MRI	Echolalia	Intellectual_disability_severe	Chronic_constipation	Cryptorchidism	Hypospadias	High_forehead	Hearing_impairment	Macrotia	Underdeveloped_nasal_alae	Strabismus	Developmental_cataract	Obsessive-compulsive_behavior	Oligohydramnios	Tetralogy_of_Fallot	Patent_ductus_arteriosus	Patent_foramen_ovale	Mitral_stenosis	Double_outlet_right_ventricle	Bilateral_talipes_equinovarus	Overlapping_toe	Neutropenia	Deep_philtrum
X-linked_intellectual_disability_Pai_type	Rare_neurologic_disease	Inguinal_hernia	Cryptorchidism	Hydrocele_testis	Narrow_mouth	Epicanthus	Protruding_ear	Prominent_nasal_bridge	Delayed_speech_and_language_development	Tapered_finger	Seizures	Global_developmental_delay	Hypertonia	Gait_disturbance	Intrauterine_growth_retardation	Recurrent_respiratory_infections	Spastic_tetraplegia	Delayed_skeletal_maturation	Intellectual_disability_severe
X-linked_intellectual_disability_Porteous_type	Rare_neurologic_disease	Intellectual_disability_mild	Global_developmental_delay	Narrow_face	Long_face	Mandibular_prognathia	Short_philtrum	Hypoplasia_of_the_maxilla	Cupped_ear	Macrotia	Bulbous_nose	Strabismus	Frontal_balding	Short_stature	Decreased_body_weight
X-linked_intellectual_disability_Schimke_type	Rare_neurologic_disease	Hearing_impairment	External_ophthalmoplegia	Intellectual_disability	Spasticity	Global_developmental_delay	Choreoathetosis	Absent_speech	Failure_to_thrive_in_infancy	Poor_suck	Poor_head_control	Short_stature	Postnatal_microcephaly	Infantile_muscular_hypotonia	Dyskinesia	Vesicoureteral_reflux	Hydronephrosis	High_palate	Narrow_nasal_bridge	Deeply_set_eye	Hyperreflexia	Cerebral_cortical_atrophy	Elbow_flexion_contracture	Hip_contracture	Knee_flexion_contracture	Ankle_flexion_contracture	Gastrostomy_tube_feeding_in_infancy
X-linked_intellectual_disability_Seemanova_type	Rare_neurologic_disease	Cryptorchidism	Hypogonadism	Microcephaly	Retrognathia	Epicanthus	Hypertelorism	Macrotia	Developmental_cataract	Intellectual_disability	Seizures	Small_for_gestational_age	Progressive_spasticity	Skeletal_muscle_atrophy	Hypoplasia_of_the_musculature	High_palate	Abnormal_heart_morphology
X-linked_intellectual_disability_Shashi_type	Rare_neurologic_disease	Macroorchidism	Everted_lower_lip_vermilion	Coarse_facial_features	Prominent_supraorbital_ridges	Macrotia	Bulbous_nose	Blepharophimosis	Delayed_speech_and_language_development	Seizures	Obesity	Intellectual_disability_moderate	Palpebral_edema
X-linked_intellectual_disability_Shrimpton_type	Rare_neurologic_disease	Microcephaly	High_forehead	Strabismus	Short_stature	Intellectual_disability_severe
X-linked_intellectual_disability_Siderius_type	Rare_neurologic_disease	Cryptorchidism	Oral_cleft	Cleft_upper_lip	Long_face	Broad_nasal_tip	Synophrys	Large_hands	Preaxial_hand_polydactyly	Intellectual_disability_mild	Low_posterior_hairline	Scoliosis	Decreased_testicular_size
X-linked_intellectual_disability_Snyder_type	Rare_neurologic_disease	Kyphoscoliosis	Cleft_palate	Thick_lower_lip_vermilion	Narrow_face	Long_face	Facial_asymmetry	Osteoporosis	Arachnodactyly	Disproportionate_tall_stature	Nasal_speech	Unsteady_gait	Kyphosis	Decreased_muscle_mass	Infantile_muscular_hypotonia	Long_toe	Slender_toe	Cryptorchidism	Testicular_atrophy	Hypospadias	Narrow_mouth	High_palate	Hypertelorism	Smooth_philtrum	Low-set_ears	Bulbous_nose	Prominent_nasal_bridge	Anteverted_nares	Webbed_neck	Upslanted_palpebral_fissure	Synophrys	Dental_crowding	Delayed_speech_and_language_development	Intellectual_disability_mild	Myoclonus	Absent_speech	Abnormal_facial_shape	Generalized_myoclonic_seizures	EEG_abnormality	Inability_to_walk	Recurrent_fractures	Difficulty_standing	Involuntary_movements	Patchy_hypo-_and_hyperpigmentation	Unilateral_ptosis	Asymmetry_of_the_ears	Focal_motor_seizure	Sparse_eyebrow	Ectopic_kidney
X-linked_intellectual_disability_Stevenson_type	Rare_neurologic_disease	Tall_stature	Abnormality_of_the_pinna	Thickened_helices	Thick_eyebrow	Microdontia	Large_hands	Tapered_finger	Muscular_hypotonia	Global_developmental_delay	Areflexia	Obesity	Long_foot	Abnormal_facial_shape	Intellectual_disability_moderate	Genu_valgum	Abnormal_dermatoglyphics	Thick_nasal_alae	Broad_columella	Tented_upper_lip_vermilion	Intellectual_disability_severe	Feeding_difficulties	Palpebral_edema
[truncated: 20 more rows]
[truncated: 20 more columns]
