# Supplementary material for: The visualization of Orphadata neurology phenotypes
Source: Front Digit Health. 2023 Jan 27;5:1064936. doi: 10.3389/fdgth.2023.1064936 (PMC9911440; doi:10.3389/fdgth.2023.1064936)
Supplement: Supplementary file 2 [file Table2.xlsx]

## Sheet: Sheet1
LABEL	Use	1	2	3	4	5	6	7	8	9	10	11	12	13	14	15	16	17	behavior	cognitive	coordination	cranial_nerve	gait	hyperkinesia	hyperreflexia	hypokinesia	miscellaneous	pain	speech	tremor	SUM
DYT_16	1	Limb dystonia	Torticollis	Dysarthria	Parkinsonism	Hyperreflexia	Dysphonia	Dysphagia	Bradykinesia	Postural tremor	Orofacial dyskinesia	Unsteady gait	Abnormal pyramidal sign	Lower limb pain	Motor delay	Intellectual disability			0	2	0	1	1	3	2	2	0	1	2	1	15
DYT_27	1	Oromandibular dystonia	Laryngeal dystonia	Action tremor	Writer's cramp	Limb dystonia	Axial dystonia	Focal dystonia	Upper limb postural tremor										0	0	0	0	0	7	0	0	0	0	0	1	8
DYT_4	1	Blepharospasm	Dementia	Dysphagia	Dysphonia	Generalized dystonia	Laryngeal dystonia	Movement abnormality of the tongue	Open mouth	Torticollis	Gait disturbance	Eunuchoid habitus	Sunken cheeks	Dysdiadochokinesis	Respiratory distress	Kyphoscoliosis	Involuntary movements	Upper limb postural tremor	0	1	1	2	1	6	0	0	4	0	1	1	17
DYT_6	1	Dystonia	Generalized dystonia	Dysarthria	Torticollis	Blepharospasm	Laryngeal dystonia	Craniofacial dystonia	Lingual dystonia	Limb dystonia									0	0	0	0	0	8	0	0	0	0	1	0	9
