# Supplementary material for: The visualization of Orphadata neurology phenotypes
Source: Front Digit Health. 2023 Jan 27;5:1064936. doi: 10.3389/fdgth.2023.1064936 (PMC9911440; doi:10.3389/fdgth.2023.1064936)
Supplement: Supplementary file 3 [file Table3.xlsx]

## Sheet: Sheet3
Label	hyperkinesia	miscellaneous	behavior	speech-language	hypokinesia	tremor	hypertonia	hyperreflexia	gait-balance	ataxia	cognitive	EOMS	sleep	head	cranial-nerve	vision	dysautonomia	sensory	weakness
AD-dopa-responsive-dystonia	4	2	2	0	1	1	1	2	0	1	0	1	1	0	1	0	0	1	0
Adult-onset-dystonia-parkinsonism	3	0	3	1	2	0	2	1	0	1	1	2	0	0	0	0	0	0	0
AR-dopa-responsive-dystonia	5	4	1	0	1	1	1	2	0	1	1	0	1	0	1	0	0	0	0
Cranio-cervical-dystonia-with-upper-limb	4	0	0	0	0	3	0	0	0	0	0	0	0	0	0	0	0	0	0
Cyanide-induced-parkinsonism-dystonia	0	0	1	3	3	1	1	1	3	0	0	1	0	0	0	0	0	0	0
Dopa-responsive-dystonia	5	3	7	2	1	0	1	0	1	1	0	0	2	0	0	0	1	0	1
Dopa-responsive-dystonia-sepiapterin	2	3	0	0	1	0	2	1	0	0	1	0	2	0	1	0	1	0	1
Dystonia-aphonia	3	0	1	3	0	0	0	0	1	0	1	1	0	0	0	0	0	0	0
Dystonia-parkinsonism-hypermanganesemia	3	1	0	1	2	0	1	2	1	0	0	0	0	0	0	0	0	0	0
Dystonia-polycythemia-hypermanganesemia	1	0	0	1	1	1	2	0	0	3	0	0	0	0	0	0	0	0	0
DYT13	8	0	0	1	0	2	0	0	0	0	0	0	0	0	0	0	0	0	0
DYT16	3	0	0	1	2	1	0	2	1	0	2	0	0	3	1	0	0	0	0
DYT17	3	0	0	2	1	0	0	0	0	0	0	0	0	0	0	0	0	0	0
DYT2	4	1	0	1	0	0	0	0	0	0	0	0	0	0	0	0	0	0	0
DYT21	8	0	0	0	0	0	0	0	0	0	0	0	0	0	0	0	0	0	0
DYT23	5	1	1	1	0	2	0	0	1	0	0	0	0	0	0	0	0	0	0
DYT25	7	0	0	0	0	0	0	0	0	0	0	0	0	0	0	0	0	0	0
DYT27	5	0	0	0	0	2	0	0	0	0	0	0	0	0	0	0	0	0	0
DYT4	3	1	0	1	0	1	0	0	0	1	1	0	0	1	0	0	0	0	0
DYT6	7	0	0	1	0	0	0	0	0	0	0	0	0	0	0	0	0	0	0
Early-onset-generalized-limb-onset-dystonia	0	0	0	1	0	0	1	0	0	0	0	0	0	0	0	0	0	0	0
Hemidystonia-hemiatrophy	2	0	0	0	0	0	0	0	0	0	0	0	0	1	0	0	0	0	0
Infantile-dystonia-parkinsonism	4	3	1	0	2	0	2	0	0	0	0	0	0	0	0	0	0	0	0
Malformations-deafness-dystonia	1	1	0	0	0	0	0	0	0	0	1	0	0	1	1	3	0	0	0
Motor-and-intellectual-disabilities-dystonia	0	2	2	0	0	0	0	0	0	0	0	1	0	1	1	1	0	0	0
Myoclonus-dystonia	5	0	4	0	0	0	0	0	0	0	0	0	0	0	0	0	0	0	0
Oromandibular-dystonia	7	1	0	2	0	0	0	0	0	0	0	0	1	0	0	0	0	0	0
Paroxysmal-dystonic-choreathetosis	3	0	0	1	0	0	0	1	0	1	0	1	0	0	0	0	0	1	0
Paroxysmal-exercise-induced-dystonia	1	0	0	0	0	0	0	0	0	0	0	1	0	0	0	0	0	0	0
Progressive-myoclonic-epilepsy-with-dystonia	2	2	0	0	0	0	0	0	0	0	0	0	0	0	0	2	0	0	0
Rapid-onset-dystonia-parkinsonism	3	1	2	2	2	1	0	0	0	0	0	0	0	0	0	0	0	0	0
X-linked-dystonia-parkinsonism	5	0	0	0	1	2	1	0	2	0	0	0	0	0	0	0	0	0	0
