# Supplementary material for: The visualization of Orphadata neurology phenotypes
Source: Front Digit Health. 2023 Jan 27;5:1064936. doi: 10.3389/fdgth.2023.1064936 (PMC9911440; doi:10.3389/fdgth.2023.1064936)
Supplement: Supplementary file 4 [file Table4.xlsx]

## Sheet: all_orphanet_rows
Disease
Alexander_disease	Macrocephaly	Intellectual_disability	Seizures	Spasticity	Agenesis_of_corpus_callosum	Hyperreflexia	Megalencephaly	Failure_to_thrive	Frontal_bossing	Nausea_and_vomiting	Neurological_speech_impairment	Clonus	EEG_abnormality	Sleep_disturbance	Scoliosis	Abnormal_pyramidal_sign	Large_face	Abnormality_of_eye_movement	Ptosis	Nystagmus	Diplopia	Emotional_lability	Depressivity	Hyperhidrosis	Ataxia	Dysarthria	Gait_disturbance	Tremor	Dysphonia	Dysphagia	Constipation	Hypothermia	Dysphasia	Tetraplegia	Cerebral_calcification	Hypotension	Kyphosis	Sleep_apnea	Facial_palsy	Recurrent_singultus	High_palate	Hydrocephalus	Short_neck	Diabetes_mellitus	Hypothyroidism	Hypertension	Precocious_puberty	Osteopenia	Muscular_hypotonia
Alpha-mannosidosis	Macroglossia	Coarse_facial_features	Hearing_impairment	Cataract	Intellectual_disability	Global_developmental_delay	Splenomegaly	Hepatomegaly	Skeletal_dysplasia	Delayed_skeletal_maturation	Craniofacial_hyperostosis	Depressed_nasal_bridge	Type_II_diabetes_mellitus	Corneal_opacity	Hypoplastic_inferior_ilia	Inguinal_hernia	Narrow_palate	Gingival_overgrowth	Hypertelorism	Prominent_supraorbital_ridges	Chronic_otitis_media	Macrotia	Short_neck	Behavioral_abnormality	Muscular_hypotonia	Hip_dysplasia	Scoliosis	Kyphosis	Bowing_of_the_long_bones	Open_bite	Abnormality_of_the_helix	Generalized_abnormality_of_skin	Macrocephaly	Mandibular_prognathia	Widely_spaced_teeth	Dental_malocclusion	Hallucinations	Arthritis	Recurrent_respiratory_infections	Increased_intracranial_pressure	Avascular_necrosis	Synostosis_of_joints
Aspartylglucosaminuria	Inguinal_hernia	Macroorchidism	Macroglossia	Abnormality_of_the_dentition	Gingival_overgrowth	Coarse_facial_features	Mandibular_prognathia	Hypertelorism	Chronic_otitis_media	Wide_nasal_bridge	Carious_teeth	Behavioral_abnormality	Delayed_speech_and_language_development	Pectus_carinatum	Intellectual_disability	Seizures	Arthritis	Joint_stiffness	Umbilical_hernia	Splenomegaly	Pes_planus	Abnormal_facial_shape	Malabsorption	Neurological_speech_impairment	Recurrent_respiratory_infections	Hepatomegaly	Sleep_disturbance	Scoliosis	Thickened_calvaria	Delayed_skeletal_maturation	Abnormality_of_the_ulna	Abnormal_cortical_bone_morphology	Short_nose	Abnormal_vertebral_morphology	Abnormality_of_amino_acid_metabolism	Beaking_of_vertebral_bodies	Anterior_beaking_of_lumbar_vertebrae	Microtia	Vascular_skin_abnormality	Aspartylglucosaminuria	Thick_vermilion_border	Dyskinesia	Large_face
Multiple_sulfatase_deficiency	Hydrocephalus	Microcephaly	Macrocephaly	Coarse_facial_features	Smooth_philtrum	Sensorineural_hearing_impairment	Anteverted_nares	Visual_impairment	Cataract	Thick_eyebrow	Optic_atrophy	Intellectual_disability	Seizures	Global_developmental_delay	Neonatal_hypotonia	Joint_stiffness	Splenomegaly	Coarse_hair	Hepatomegaly	Developmental_regression	Abnormality_of_peripheral_nerve_conduction	Short_stature	Depressed_nasal_bridge	Rapid_neurologic_deterioration	Abnormality_of_retinal_pigmentation	Corneal_opacity	Ichthyosis	Mucopolysacchariduria	Broad_hallux_phalanx	Broad_thumb
Beta-mannosidosis	Hearing_impairment	Intellectual_disability	Seizures	Abnormal_facial_shape	Recurrent_respiratory_infections	Hypoplasia_of_the_abdominal_wall_musculature
Canavan_disease	Macrocephaly	Hearing_impairment	Visual_impairment	Blindness	Optic_atrophy	Abnormality_of_visual_evoked_potentials	Seizures	Muscular_hypotonia	Global_developmental_delay	Hypertonia	Flexion_contracture	Gastroesophageal_reflux	EEG_abnormality	Developmental_regression	Reduced_consciousness/confusion	Abnormality_of_retinal_pigmentation	Feeding_difficulties_in_infancy	Cognitive_impairment
Cystinosis	Proteinuria	Nephropathy	Renal_tubular_dysfunction	Photophobia	Stereotypy	Hypothyroidism	Delayed_puberty	Muscle_weakness	Failure_to_thrive	Dehydration	Polydipsia	Vomiting	Hypophosphatemia	Hypokalemia	Myopathy	Aminoaciduria	Short_stature	Corneal_opacity	Nephrogenic_diabetes_insipidus	Fatigue	Type_I_diabetes_mellitus	Renal_insufficiency	Retinopathy	Rickets	Visual_impairment	Intellectual_disability_mild	Gait_disturbance	Portal_hypertension	Fever	Malabsorption	Dysphasia	Cranial_nerve_paralysis	Abnormal_pyramidal_sign
Fucosidosis	Abnormality_of_the_dentition	Brachycephaly	Coarse_facial_features	Hearing_impairment	Hypothyroidism	Dysostosis_multiplex	Hyperhidrosis	Acrocyanosis	Seizures	Muscular_hypotonia	Spasticity	Global_developmental_delay	Failure_to_thrive	Abnormality_of_the_nail	Abnormality_of_the_cardiovascular_system	Cardiomegaly	Abnormal_facial_shape	Hepatomegaly	Spastic_tetraplegia	Kyphosis	Decreased_muscle_mass	Abnormality_of_the_gallbladder	Generalized_hyperkeratosis	Abnormal_pyramidal_sign	Corneal_opacity	Mucopolysacchariduria	Anterior_beaking_of_lumbar_vertebrae	Intellectual_disability_severe	Prominent_forehead	Vascular_skin_abnormality	Lipoatrophy
Glycogen_storage_disease_due_to_glycogen_debranching_enzyme_deficiency	Full_cheeks	Intellectual_disability_mild	Hypoglycemia	Hypertriglyceridemia	&_Immunodeficiency	&_Myopathy	&_Short_stature
Glycogen_storage_disease_due_to_muscle_phosphofructokinase_deficiency	&_Muscle_weakness	&_Anemia	&_Hyperuricemia	&_Myotonia	&_Skeletal_muscle_atrophy	&_Increased_muscle_glycogen_content
Mucopolysaccharidosis_type_6	&_Macroglossia	Thick_lower_lip_vermilion	Sinusitis	Coarse_facial_features	Hearing_impairment	Chronic_otitis_media	Short_neck	Visual_impairment	Broad_ribs	Abnormality_of_the_metaphysis	Joint_stiffness	Failure_to_thrive	Abnormal_heart_valve_morphology	Splenomegaly	Malformation_of_the_heart_and_great_vessels	Epiphyseal_dysplasia	Recurrent_upper_respiratory_tract_infections	Kyphosis	Genu_valgum	Ovoid_vertebral_bodies	Disproportionate_short-trunk_short_stature	Opacification_of_the_corneal_stroma	Mucopolysacchariduria	Thick_nasal_alae	Cognitive_impairment	Hernia
Sialidosis_type_1	Thick_lower_lip_vermilion	Coarse_facial_features	Sensorineural_hearing_impairment	Wide_nasal_bridge	Retinopathy	Visual_impairment	Cataract	Progressive_visual_loss	Nystagmus	Decreased_nerve_conduction_velocity	Pectus_carinatum	Dysostosis_multiplex	Hyperkeratosis	Intellectual_disability	Seizures	Ataxia	Muscular_hypotonia	Gait_disturbance	Muscle_weakness	Myoclonus	Tremor	Slurred_speech	Splenomegaly	Frontal_bossing	Neurological_speech_impairment	EEG_abnormality	Scoliosis	Skeletal_dysplasia	Delayed_skeletal_maturation	Kyphosis	Skeletal_muscle_atrophy	Abnormal_form_of_the_vertebral_bodies	Aminoaciduria	Increased_urinary_O-linked_sialopeptides	Short_stature	Corneal_opacity	Short_thorax	Cherry_red_spot_of_the_macula	Vascular_skin_abnormality	Urinary_excretion_of_sialylated_oligosaccharides	Abnormality_of_movement	Hernia
Mucolipidosis_type_IV	Everted_lower_lip_vermilion	Microcephaly	Coarse_facial_features	Strabismus	Retinopathy	Abnormal_electroretinogram	Photophobia	Nystagmus	Microdontia	Behavioral_abnormality	Palmoplantar_keratoderma	Intellectual_disability	Ataxia	Muscular_hypotonia	Gait_disturbance	Absent_speech	Hyperreflexia	EEG_abnormality	Genu_recurvatum	Abnormality_of_ganglioside_metabolism	Biparietal_narrowing	Abnormal_nasal_morphology	Developmental_stagnation	Abnormality_of_retinal_pigmentation	Corneal_opacity	Aplasia/Hypoplasia_of_the_abdominal_wall_musculature	Abnormality_of_mucopolysaccharide_metabolism
Mucolipidosis_type_III	Inguinal_hernia	Cleft_palate	Prominent_occiput	Coarse_facial_features	Hearing_abnormality	Visual_impairment	Acne	Joint_stiffness	Abnormal_aortic_valve_morphology	Abnormal_heart_valve_morphology	Abnormal_facial_shape	Malformation_of_the_heart_and_great_vessels	Abnormality_of_the_hip_bone	Hyperlordosis	Abnormal_form_of_the_vertebral_bodies	Short_stature	Reduced_bone_mineral_density	Craniofacial_hyperostosis	Corneal_opacity	Large_iliac_wings	Hypoplastic_inferior_ilia	Fatigue	Cognitive_impairment
Sandhoff_disease	Macrocephaly	Full_cheeks	Hearing_impairment	Blindness	Seizures	Ataxia	Muscle_weakness	Failure_to_thrive	Congestive_heart_failure	Splenomegaly	Recurrent_respiratory_infections	Hepatomegaly	Motor_deterioration	Skeletal_dysplasia	Kyphosis	Abnormality_of_glycosphingolipid_metabolism	Progressive_psychomotor_deterioration	Cherry_red_spot_of_the_macula	Abnormality_of_movement
Mucopolysaccharidosis_type_7	Inguinal_hernia	Coarse_facial_features	Short_neck	Lymphedema	Intellectual_disability	Muscular_hypotonia	Joint_stiffness	Umbilical_hernia	Ascites	Splenomegaly	Hydrops_fetalis	Metatarsus_adductus	Abnormality_of_the_pleura	Recurrent_respiratory_infections	Scoliosis	Abnormality_of_the_hip_bone	Anterior_beaking_of_lower_thoracic_vertebrae	Diaphyseal_thickening	Corneal_opacity	Mucopolysacchariduria	Anterior_beaking_of_lumbar_vertebrae	Epiphyseal_stippling	Hepatitis	Flat_face	Arteriovenous_malformation	Enlarged_thorax
Recessive_X-linked_ichthyosis	Cryptorchidism	Autism	Dry_skin	Hyperkeratosis	Hypohidrosis	Neurological_speech_impairment	Attention_deficit_hyperactivity_disorder	Opacification_of_the_corneal_stroma	Ichthyosis
Turner_syndrome	Abnormality_of_the_ovary	Short_neck	Delayed_puberty	Increased_circulating_gonadotropin_level	Short_sternum	Osteopenia	Osteoporosis	Growth_delay	Intrauterine_growth_retardation	Delayed_skeletal_maturation	Cubitus_valgus	High_urinary_gonadotropins_(primary_hypogonadism)	Short_stature	Wide_intermamillary_distance	Aplasia/Hypoplasia_of_the_nipples	Premature_ovarian_insufficiency	Female_infertility	Postnatal_growth_retardation	Increased_upper_to_lower_segment_ratio	Abnormal_morphology_of_forearm_bone	Enlarged_thorax	Precocious_menopause	High_palate	Retrognathia	Micrognathia	Hearing_impairment	Low-set_ears	Recurrent_otitis_media	Webbed_neck	Thickened_nuchal_skin_fold	Broad_neck	Behavioral_abnormality	Anxiety	Impaired_use_of_nonverbal_behaviors	Primary_amenorrhea	Hypertension	Glucose_intolerance	Secondary_amenorrhea	Hashimoto_thyroiditis	Shield_chest	Specific_learning_disability	Hepatic_steatosis	Obesity	Failure_to_thrive_in_infancy	Hypoplastic_toenails	Low_posterior_hairline	High_narrow_palate	Kyphosis	Genu_valgum
Beta-thalassemia	Abnormality_of_the_skeletal_system	Pallor	Splenomegaly	Anemia	Microcytic_anemia	Abnormal_hemoglobin	Hypogonadotrophic_hypogonadism	Irritability	Abnormal_skull_morphology	Muscle_weakness	Respiratory_insufficiency	Hepatomegaly	Reduced_bone_mineral_density	Abnormality_of_temperature_regulation	Abnormality_of_iron_homeostasis	Cholelithiasis	Hypertrophic_cardiomyopathy	Thrombocytopenia	Venous_thrombosis	Hepatitis	Skin_ulcer
Duchenne_and_Becker_muscular_dystrophy	Intellectual_disability_mild	Gait_disturbance	Joint_stiffness	Hypertrophic_cardiomyopathy	Developmental_regression	Scoliosis	Slender_long_bone	Myopathy	Skeletal_muscle_atrophy	Elevated_serum_creatine_kinase	Hyperlordosis	EMG_abnormality	Reduced_bone_mineral_density
Cystic_fibrosis	Exocrine_pancreatic_insufficiency	Malabsorption	Recurrent_respiratory_infections	Pulmonary_fibrosis	Hepatomegaly	Biliary_cirrhosis	Immunodeficiency	Decreased_antibody_level_in_blood
Alpha-thalassemia	Jaundice	Cholelithiasis	Splenomegaly	Hydrops_fetalis	Hemolytic_anemia	Anemia	Microcytic_anemia	Hypersplenism	Myelodysplasia	Abnormality_of_immune_system_physiology	Abnormal_hemoglobin	Cognitive_impairment
Facioscapulohumeral_dystrophy	Mask-like_facies	Sensorineural_hearing_impairment	Abnormal_eyelash_morphology	Malformation_of_the_heart_and_great_vessels	Skeletal_muscle_atrophy	Elevated_serum_creatine_kinase	Hyperlordosis	EMG_abnormality	Abnormal_retinal_vascular_morphology	Palpebral_edema
Emery-Dreifuss_muscular_dystrophy	Obesity	Dilated_cardiomyopathy	Atrioventricular_block	Pectus_excavatum	Reduced_tendon_reflexes	Joint_stiffness	Myotonia	Myopathy	Elevated_serum_creatine_kinase	Limb-girdle_muscular_dystrophy	Sprengel_anomaly	Gait_disturbance	Achilles_tendon_contracture	Hypertriglyceridemia	Waddling_gait	Elbow_flexion_contracture	Increased_LDL_cholesterol_concentration	Spinal_rigidity	Back_pain	EMG:_myopathic_abnormalities	Scapular_winging	Rimmed_vacuoles	Decreased_cervical_spine_flexion_due_to_contractures_of_posterior_cervical_muscles	Proximal_upper_limb_amyotrophy	Proximal_lower_limb_amyotrophy	Proximal_muscle_weakness_in_lower_limbs	Proximal_muscle_weakness_in_upper_limbs	Type_1_muscle_fiber_atrophy	Absent_muscle_fiber_emerin	Toe_walking	Ptosis	Muscular_hypotonia	Scoliosis	Kyphosis	Hyperlordosis	Supraventricular_arrhythmia	Ichthyosis	Lipodystrophy
Kearns-Sayre_syndrome	Hearing_impairment	Progressive_external_ophthalmoplegia	Anterior_hypopituitarism	Ataxia	Muscular_hypotonia	Reduced_tendon_reflexes	Third_degree_atrioventricular_block	Delayed_skeletal_maturation	Ragged-red_muscle_fibers	Skeletal_muscle_atrophy	EMG_abnormality	Hemiplegia/hemiparesis	Progressive_intervertebral_space_narrowing	Abnormality_of_retinal_pigmentation
Thomsen_and_Becker_disease	Myotonia	EMG_abnormality
MERRF	Sensorineural_hearing_impairment	Optic_atrophy	Multiple_lipomas	Ataxia	Generalized_myoclonic_seizures	Myopathy	Ragged-red_muscle_fibers	EMG_abnormality	Short_stature	Abnormality_of_movement	Cognitive_impairment
Central_core_disease	Muscular_hypotonia	Motor_delay	Congenital_hip_dislocation	Joint_laxity	Mitral_valve_prolapse	Talipes_equinovarus	Pes_planus	Malignant_hyperthermia	Kyphoscoliosis	Multiple_joint_contractures	Myopathy	Easy_fatigability	Muscle_stiffness	Pelvic_girdle_muscle_weakness	Type_1_muscle_fiber_predominance	Central_core_regions_in_muscle_fibers	Ophthalmoplegia	Bulbar_signs	Nemaline_bodies	Abnormal_levels_of_creatine_kinase_in_blood
Fabry_disease	Renal_insufficiency	Abnormal_renal_tubule_morphology	Proteinuria	Nephrotic_syndrome	Nephropathy	Thick_lower_lip_vermilion	Coarse_facial_features	Hearing_impairment	Sensorineural_hearing_impairment	Cataract	Conjunctival_telangiectasia	Optic_atrophy	Behavioral_abnormality	Depressivity	Anxiety	Hematuria	Hypertension	Delayed_puberty	Diabetes_insipidus	Hyperkeratosis	Hypohidrosis	Lymphedema	Angiokeratoma	Corneal_dystrophy	Seizures	Arthritis	Subcutaneous_nodule	Congestive_heart_failure	Abnormal_myocardium_morphology	Hypertrophic_cardiomyopathy	Abnormal_aortic_valve_morphology	Mitral_regurgitation	Atrioventricular_block	Angina_pectoris	Left_ventricular_hypertrophy	Anemia	Fever	Nausea_and_vomiting	Malabsorption	Abdominal_pain	Anorexia	Respiratory_insufficiency	Dyspnea	Emphysema	Vertigo	Transient_ischemic_attack	Developmental_regression	Achalasia	Abnormality_of_femur_morphology
Marfan_syndrome	Pectus_carinatum	Striae_distensae	Arachnodactyly	Disproportionate_tall_stature	Slender_build	Pes_planus	Spontaneous_pneumothorax	Dilatation_of_the_ascending_aorta	Chronic_fatigue	Narrow_face	Visual_impairment	Myopia	Dental_crowding	Pectus_excavatum	Ectopia_lentis	Lens_subluxation	Joint_hypermobility	Mitral_valve_prolapse	Sleep_disturbance	Scoliosis	High_narrow_palate	Protrusio_acetabuli	Arthralgia/arthritis	Increased_axial_length_of_the_globe	Lens_luxation	Malar_anomaly	Dural_ectasia	Inguinal_hernia	Cleft_palate	Dolichocephaly	Retrognathia	Micrognathia	Downslanted_palpebral_fissures	Glaucoma	Retinal_detachment	Osteopenia	Osteoporosis	Muscular_hypotonia	Congestive_heart_failure	Emphysema	Hemoptysis	Meningocele	Aneurysm_of_an_abdominal_artery	Kyphosis	Limited_elbow_movement	Skeletal_muscle_atrophy	Spondylolisthesis	Myalgia	Cachexia
Ataxia-telangiectasia	Abnormal_testis_morphology	Polycystic_ovaries	Strabismus	Abnormality_of_eye_movement	Nystagmus	Diabetes_mellitus	Delayed_puberty	Seizures	Ataxia	Spasticity	Dysarthria	Gait_disturbance	Tremor	Failure_to_thrive	Lymphopenia	Neurological_speech_impairment	Recurrent_respiratory_infections	Premature_graying_of_hair	Neoplasm	Abnormality_of_the_immune_system	Immunodeficiency	Elevated_hepatic_transaminase	Skeletal_muscle_atrophy	Abnormality_of_chromosome_stability	Decreased_antibody_level_in_blood	Short_stature	Cellular_immunodeficiency	Hypopigmentation_of_hair	Type_II_diabetes_mellitus	Prematurely_aged_appearance	Multiple_cafe-au-lait_spots	Aplasia/Hypoplasia_of_the_skin	Aplasia/Hypoplasia_of_the_thymus	Abnormality_of_movement	Cognitive_impairment	Mucosal_telangiectasiae	Telangiectasia_of_the_skin
Down_syndrome	Decreased_fertility	Macroglossia	Narrow_mouth	Abnormality_of_the_dentition	Thick_lower_lip_vermilion	Narrow_palate	Open_mouth	Abnormality_of_the_fontanelles_or_cranial_sutures	Brachycephaly	Epicanthus	Conductive_hearing_impairment	Depressed_nasal_ridge	Short_neck	Thickened_nuchal_skin_fold	Strabismus	Cataract	Myopia	Upslanted_palpebral_fissure	Microdontia	Hypothyroidism	Hypotrichosis	Brachydactyly	Intellectual_disability	Muscular_hypotonia	Gait_disturbance	Joint_laxity	Obesity	Umbilical_hernia	Sandal_gap	Anal_atresia	Aganglionic_megacolon	Developmental_regression	Malformation_of_the_heart_and_great_vessels	Downturned_corners_of_mouth	Short_nose	Clinodactyly_of_the_5th_finger	Depressed_nasal_bridge	Type_II_diabetes_mellitus	Acute_megakaryocytic_leukemia	Impaired_pain_sensation	Prematurely_aged_appearance	Bilateral_single_transverse_palmar_creases	Renal_hypoplasia/aplasia	Protruding_tongue	Abnormality_of_immune_system_physiology	Flat_face	Abnormality_of_the_lymphatic_system	Round_ear
CHARGE_syndrome	Cryptorchidism	Hypogonadotrophic_hypogonadism	Micropenis	Abnormality_of_the_inner_ear	Hearing_impairment	Overfolded_helix	Anosmia	Iris_coloboma	Delayed_puberty	Global_developmental_delay	Abnormal_cranial_nerve_morphology	External_ear_malformation	Feeding_difficulties_in_infancy	Aplasia/Hypoplasia_of_the_earlobes	Hypoplasia_of_the_semicircular_canal	Abnormal_morphology_of_female_internal_genitalia	Bifid_scrotum	Labial_hypoplasia	Narrow_mouth	Cleft_palate	Cleft_upper_lip	Narrow_face	Facial_asymmetry	Low-set_posteriorly_rotated_ears	Choanal_atresia	Strabismus	Ptosis	Anophthalmia	Chorioretinal_coloboma	Microphthalmia	Nystagmus	Optic_atrophy	Delayed_eruption_of_teeth	Autism	Obsessive-compulsive_behavior	Anterior_hypopituitarism	Intellectual_disability	Muscular_hypotonia	Polyhydramnios	Tetralogy_of_Fallot	Patent_ductus_arteriosus	Abnormal_aortic_valve_morphology	Abnormal_cardiac_septum_morphology	Gastroesophageal_reflux	Malformation_of_the_heart_and_great_vessels	Short_stature	Dilatation_of_the_aortic_arch	Depressed_nasal_bridge	Attention_deficit_hyperactivity_disorder
Oculocerebrorenal_syndrome_of_Lowe	Inguinal_hernia	Azoospermia	Cryptorchidism	Renal_insufficiency	Abnormal_renal_tubule_morphology	Proteinuria	Nephrocalcinosis	Abnormality_of_the_dentition	Narrow_palate	Open_mouth	Thin_upper_lip_vermilion	Gingivitis	Everted_lower_lip_vermilion	Long_face	Full_cheeks	Mandibular_prognathia	Long_philtrum	Micrognathia	Low-set_posteriorly_rotated_ears	Chronic_otitis_media	Protruding_ear	Strabismus	Deeply_set_eye	Glaucoma	Cataract	Buphthalmos	Microphthalmia	Upslanted_palpebral_fissure	Abnormal_pupil_morphology	Lacrimation_abnormality	Nystagmus	Amblyopia	Carious_teeth	Dental_crowding	Taurodontia	Abnormality_of_dental_eNAME	Delayed_eruption_of_teeth	Periodontitis	Depressivity	Obsessive-compulsive_behavior	Stereotypy	Anxiety	Abnormality_of_the_ribs	Nephrolithiasis	Hematuria	Delayed_puberty	Hyperparathyroidism	Hyperaldosteronism	Diabetes_insipidus
Retinoblastoma	Retinoblastoma	Strabismus	Glaucoma	Proptosis	Leukocoria	Hypopyon	Uveitis	Heterochromia_iridis	Leukemia	Lymphoma	Osteosarcoma	Rhabdomyosarcoma	Melanoma	Reduced_visual_acuity	Abnormality_of_retinal_pigmentation	Retinal_calcification	Vitreous_hemorrhage	Hyphema	Abnormal_eye_morphology	Subretinal_pigment_epithelium_hemorrhage	Red_eye	Leiomyosarcoma	Cellulitis
Fragile_X_syndrome	Macroorchidism	Sinusitis	Macrocephaly	Narrow_face	Long_face	Mandibular_prognathia	Otitis_media	Chronic_otitis_media	Protruding_ear	Strabismus	Autism	Anxiety	Seizures	Muscular_hypotonia	Joint_laxity	Mitral_valve_prolapse	Pes_planus	Large_forehead	Frontal_bossing	Gastroesophageal_reflux	Cerebral_cortical_atrophy	Neurological_speech_impairment	Intellectual_disability_moderate	Folate-dependent_fragile_site_at_Xq28	Dilatation_of_the_ascending_aorta	Attention_deficit_hyperactivity_disorder	Self-injurious_behavior
Mucopolysaccharidosis_type_1	Inguinal_hernia	Thick_lower_lip_vermilion	Gingival_overgrowth	Everted_lower_lip_vermilion	Hydrocephalus	Sinusitis	Macrocephaly	Dolichocephaly	Abnormality_of_the_face	Coarse_facial_features	Full_cheeks	Low_anterior_hairline	Hearing_impairment	Chronic_otitis_media	Sensorineural_hearing_impairment	Retinopathy	Glaucoma	Visual_impairment	Optic_atrophy	Widely_spaced_teeth	Microdontia	Abnormality_of_the_metaphysis	Split_hand	Intellectual_disability	Joint_dislocation	Joint_stiffness	Abnormality_of_the_voice	Congestive_heart_failure	Hypertrophic_cardiomyopathy	Abnormal_aortic_valve_morphology	Abnormal_heart_valve_morphology	Splenomegaly	Malabsorption	Apnea	Recurrent_respiratory_infections	Generalized_hirsutism	Developmental_regression	Scoliosis	Arthralgia	Abnormality_of_the_hip_bone	Abnormal_form_of_the_vertebral_bodies	Paresthesia	Spinal_canal_stenosis	Short_stature	Hemiplegia/hemiparesis	Abnormal_nasal_morphology	Depressed_nasal_bridge	Abnormality_of_epiphysis_morphology	Corneal_opacity
22q11.2_deletion_syndrome	Vesicoureteral_reflux	Polycystic_kidney_dysplasia	Abnormality_of_the_uterus	Narrow_mouth	Hydrocephalus	Microcephaly	Malar_flattening	Epicanthus	Long_philtrum	Micrognathia	Low-set_ears	Small_earlobe	Overfolded_helix	Prominent_nasal_bridge	Wide_nasal_bridge	Short_neck	Strabismus	Downslanted_palpebral_fissures	Ptosis	Cataract	Microphthalmia	Upslanted_palpebral_fissure	Posterior_embryotoxon	Abnormality_of_dental_eNAME	Behavioral_abnormality	Autism	Anxiety	Hypoplasia_of_the_thymus	Abnormal_skull_morphology	Hypopigmented_skin_patches	Retinal_arteriolar_tortuosity	Seizures	Tetany	Polyhydramnios	Atrial_septal_defect	Tetralogy_of_Fallot	Abnormal_pulmonary_valve_morphology	Patent_ductus_arteriosus	Abnormal_aortic_valve_morphology	Inguinal_hernia	Cryptorchidism	Hypospadias	Renal_hypoplasia	Abnormality_of_the_dentition	Cleft_palate	Turricephaly	Long_face	Hypertelorism	Short_philtrum
Williams_syndrome	Recurrent_urinary_tract_infections	Abnormality_of_the_bladder	Bladder_diverticulum	Inguinal_hernia	Functional_abnormality_of_male_internal_genitalia	Cryptorchidism	Hypogonadotrophic_hypogonadism	Renal_duplication	Vesicoureteral_reflux	Renal_insufficiency	Renal_hypoplasia	Proteinuria	Nephrocalcinosis	Pelvic_kidney	Polycystic_ovaries	Wide_mouth	Macroglossia	Thick_lower_lip_vermilion	Gingival_overgrowth	Everted_lower_lip_vermilion	Microcephaly	Narrow_face	Coarse_facial_features	Epicanthus	Pointed_chin	Broad_forehead	Long_philtrum	Micrognathia	High_forehead	Low-set_posteriorly_rotated_ears	Chronic_otitis_media	Macrotia	Sensorineural_hearing_impairment	Protruding_ear	Wide_nasal_bridge	Abnormality_of_the_neck	Megalocornea	Strabismus	Glaucoma	Visual_impairment	Cataract	Myopia	Blepharophimosis	Posterior_embryotoxon	Lacrimation_abnormality	Blue_irides	Hypodontia	Carious_teeth	Abnormality_of_dental_eNAME
Wolf-Hirschhorn_syndrome	Cryptorchidism	Hypospadias	Abnormality_of_the_kidney	Abnormality_of_the_genital_system	Abnormality_of_the_urinary_system	Abnormality_of_the_mouth	Abnormal_lip_morphology	Cleft_palate	Cleft_upper_lip	Microcephaly	Dolichocephaly	Epicanthus	Abnormality_of_the_philtrum	Hypertelorism	Short_philtrum	Micrognathia	High_forehead	Hearing_impairment	Low-set_posteriorly_rotated_ears	Chronic_otitis_media	Wide_nasal_bridge	Megalocornea	Strabismus	Retinopathy	Downslanted_palpebral_fissures	Ptosis	Proptosis	Iris_coloboma	Nystagmus	Sclerocornea	Optic_atrophy	Hypodontia	Abnormality_of_the_thorax	Congenital_diaphragmatic_hernia	Rib_fusion	Abnormality_of_the_vertebral_column	Osteoporosis	Sacral_dimple	Hemangioma	Arachnodactyly	Split_hand	Preaxial_hand_polydactyly	Seizures	Ataxia	Muscular_hypotonia	Global_developmental_delay	Agenesis_of_corpus_callosum	Skull_defect	Failure_to_thrive
Ataxia_with_vitamin_E_deficiency	Visual_impairment	Nystagmus	Abnormality_of_visual_evoked_potentials	Nyctalopia	Sensory_neuropathy	Diabetes_mellitus	Ataxia	Dysarthria	Mental_deterioration	Hypertonia	Areflexia	Gait_disturbance	Dysmetria	Muscle_weakness	Dystonia	Tremor	Hypertrophic_cardiomyopathy	Pes_cavus	Dysdiadochokinesis	Neurological_speech_impairment	Developmental_regression	Scoliosis	Skeletal_muscle_atrophy	Hemiplegia/hemiparesis	Abnormal_pyramidal_sign	Abnormality_of_retinal_pigmentation	Peripheral_neuropathy	Arrhythmia
Rheumatic_fever	Nephrotic_syndrome	Sinusitis	Epistaxis	Behavioral_abnormality	Pallor	Gait_disturbance	Arthritis	Subcutaneous_nodule	Abnormal_mitral_valve_morphology	Abnormal_aortic_valve_morphology	Abnormal_heart_valve_morphology	Pericarditis	Fever	Nausea_and_vomiting	Constipation	Abdominal_pain	Anorexia	Chorea	Migraine	Respiratory_insufficiency	Abnormality_of_the_pleura	Neurological_speech_impairment	Fasciculations	Arthralgia	Aplasia/Hypoplasia_of_the_abdominal_wall_musculature	Dyslexia	Dysgraphia	Erythema	Arrhythmia	Fatigue	Macule	Myocarditis	Hemiballismus	Endocarditis	Chest_pain	Recurrent_pharyngitis
X-linked_agammaglobulinemia	Glossoptosis	Sinusitis	Chronic_otitis_media	Sensorineural_hearing_impairment	Conjunctivitis	Skin_rash	Hypopigmented_skin_patches	Meningitis	Arthritis	Failure_to_thrive	Alopecia	Weight_loss	Thrombocytopenia	Neutropenia	Anemia	Fever	Malabsorption	Chronic_diarrhea	Abnormal_lung_morphology	Neoplasm	Immunodeficiency	Osteomyelitis	Hypocalcemia	Autoimmunity	Short_stature	Agammaglobulinemia	Recurrent_pneumonia	Hepatitis	Fatigue	Cellulitis	Abnormality_of_the_lymphatic_system	Abnormality_of_the_tonsils	Sepsis	Recurrent_cutaneous_abscess_formation	Skin_ulcer
Wiskott-Aldrich_syndrome	Nephropathy	Abnormality_of_the_menstrual_cycle	Gingival_bleeding	Sinusitis	Otitis_media	Chronic_otitis_media	Epistaxis	Keratitis	Blepharitis	Conjunctivitis	Hypoplasia_of_the_thymus	Eczema	Petechiae	Bruising_susceptibility	Purpura	Urticaria	Meningitis	Specific_learning_disability	Arthritis	Sudden_cardiac_death	Thrombocytopenia	Neutropenia	Hemolytic_anemia	Abnormality_of_eosinophils	Lymphopenia	Anemia	Microcytic_anemia	Fever	Chronic_diarrhea	Inflammation_of_the_large_intestine	Dyspnea	Intracranial_hemorrhage	Recurrent_respiratory_infections	Hematemesis	Acute_leukemia	Hematochezia	Vasculitis	Neoplasm	Lymphoma	Immunodeficiency	Autoimmunity	Prolonged_bleeding_time	Chronic_leukemia	Chronic_obstructive_pulmonary_disease	Recurrent_intrapulmonary_hemorrhage	Spontaneous_hematomas	Peripheral_neuropathy	Internal_hemorrhage	Arrhythmia
Hypophosphatasia	Abnormality_of_the_dentition	Large_fontanelles	Irritability	Abnormality_of_the_ribs	Narrow_chest	Abnormality_of_the_metaphysis	Skin_dimple_over_apex_of_long_bone_angulation	Seizures	Muscular_hypotonia	Craniosynostosis	Failure_to_thrive_in_infancy	Anemia	Respiratory_insufficiency	Emphysema	Recurrent_fractures	Hypercalcemia	Short_stature	Bowing_of_the_long_bones	Feeding_difficulties_in_infancy	Skin_dimple
Hydrocephalus_with_stenosis_of_the_aqueduct_of_Sylvius	Hydrocephalus	Coarse_facial_features	Strabismus	Nystagmus	Adducted_thumb	Seizures	Spasticity	Agenesis_of_corpus_callosum	Absent_septum_pellucidum	Holoprosencephaly	Joint_stiffness	Aqueductal_stenosis	Increased_intracranial_pressure	Hemiplegia/hemiparesis	Intellectual_disability_severe
Ornithine_transcarbamylase_deficiency	Hepatic_failure	Splenomegaly	Hypoglycemia	Hyperammonemia	Pyloric_stenosis	Aminoaciduria
Kennedy_disease	Testicular_atrophy	Decreased_fertility	Gynecomastia	Muscular_hypotonia	Dysarthria	Hyporeflexia	Gait_disturbance	Dysphonia	Abnormal_circulating_lipid_concentration	Skeletal_muscle_atrophy	Type_II_diabetes_mellitus	Abnormality_of_movement	Erectile_dysfunction
Rubinstein-Taybi_syndrome	Cryptorchidism	Abnormality_of_the_dentition	High_palate	Microcephaly	Epicanthus	Hypertelorism	Micrognathia	Hearing_impairment	Low-set_ears	Wide_nasal_bridge	Convex_nasal_ridge	Strabismus	Downslanted_palpebral_fissures	Glaucoma	Telecanthus	Ptosis	Nasolacrimal_duct_obstruction	Carious_teeth	Irritability	Anxiety	Atypical_scarring_of_skin	Brachydactyly	Intellectual_disability	Seizures	Global_developmental_delay	Hip_dysplasia	Failure_to_thrive_in_infancy	Polyhydramnios	Constipation	Respiratory_insufficiency	Generalized_hirsutism	Highly_arched_eyebrow	Malformation_of_the_heart_and_great_vessels	Clinodactyly_of_the_5th_finger	Short_stature	Capillary_hemangioma	Joint_hyperflexibility	Finger_syndactyly	Attention_deficit_hyperactivity_disorder	Feeding_difficulties_in_infancy	Abnormal_distal_phalanx_morphology_of_finger	Broad_hallux_phalanx	Keloids	Broad_thumb	Clubbing_of_toes
X-linked_retinoschisis	Abnormality_of_the_eye	Abnormality_of_eye_movement	Glaucoma	Abnormality_of_vision	Abnormal_electroretinogram	Cataract	Retinoschisis
Hypochondroplasia	Macrocephaly	Abnormality_of_the_metaphysis	Brachydactyly	Intellectual_disability	Short_toe	Abnormality_of_pelvic_girdle_bone_morphology	Scoliosis	Skeletal_dysplasia	Osteoarthritis	Abnormality_of_femur_morphology	Genu_varum	Micromelia	Hyperlordosis	Abnormal_form_of_the_vertebral_bodies	Spinal_canal_stenosis	Joint_hyperflexibility	Bowing_of_the_long_bones	Abnormality_of_the_elbow	Sleep_apnea	Childhood_onset_short-limb_short_stature
X-linked_hypohidrotic_ectodermal_dysplasia	Everted_lower_lip_vermilion	Depressed_nasal_ridge	Delayed_eruption_of_teeth	Microdontia	Hypertension	Anterior_hypopituitarism	Hypohidrosis	Hypotrichosis	Frontal_bossing	Sparse_body_hair	Short_distal_phalanx_of_finger	Everted_upper_lip_vermilion	Type_I_diabetes_mellitus	Aplasia/Hypoplasia_of_the_eyebrow
Blue_cone_monochromatism	Visual_impairment	Abnormal_electroretinogram	Photophobia	Corneal_dystrophy	Abnormality_of_retinal_pigmentation	Blue_cone_monochromacy
Neurofibromatosis_type_1	Cryptorchidism	Tall_stature	Hearing_abnormality	Hearing_impairment	Abnormality_of_the_eye	Abnormality_of_vision	Proptosis	Heterochromia_iridis	Ataxia	Freckling	Neurological_speech_impairment	Headache	Memory_impairment	Skeletal_dysplasia	Recurrent_fractures	Genu_valgum	Slender_long_bone	Paresthesia	Abnormality_of_the_nervous_system	Delayed_puberty	Melanocytic_nevus	Multiple_lipomas	Intellectual_disability_mild	Specific_learning_disability	Subcutaneous_nodule	Kyphosis	Meningioma	Generalized_hyperpigmentation	Multiple_cafe-au-lait_spots	Neoplasm_of_the_skin	Astrocytoma	Plexiform_neurofibroma	Lisch_nodules	Macule	Attention_deficit_hyperactivity_disorder	Hydrocephalus	Macrocephaly	Abnormal_eyelid_morphology	Glaucoma	Visual_impairment	Abnormal_electroretinogram	Cataract	Myopia	Chorioretinal_coloboma	Abnormality_of_the_endocrine_system	Hypertension	Precocious_puberty	Abnormality_of_the_skeletal_system	Hypopigmented_skin_patches
Non-acquired_isolated_growth_hormone_deficiency	Anterior_hypopituitarism	Delayed_skeletal_maturation	Short_stature
Chronic_granulomatous_disease	Gingivitis	Sinusitis	Otitis_media	Eczema	Cutaneous_photosensitivity	Hypermelanotic_macule	Meningitis	Splenomegaly	Abnormality_of_neutrophils	Fever	Pyloric_stenosis	Malabsorption	Recurrent_respiratory_infections	Hepatomegaly	Tracheoesophageal_fistula	Chronic_obstructive_pulmonary_disease	Macule	Liver_abscess	Inflammatory_abnormality_of_the_eye	Mediastinal_lymphadenopathy	Sepsis	Skin_ulcer
Classic_homocystinuria	High_palate	Glaucoma	Cataract	Retinal_detachment	Myopia	Amblyopia	Optic_atrophy	Dental_crowding	Behavioral_abnormality	Psychosis	Pectus_excavatum	Pectus_carinatum	Hypertension	Osteoporosis	Urticaria	Ectopia_lentis	Arachnodactyly	Intellectual_disability	Seizures	Joint_stiffness	Disproportionate_tall_stature	Subcutaneous_hemorrhage	Anorexia	Esophageal_varix	Intracranial_hemorrhage	Pulmonary_embolism	Sparse_scalp_hair	Gastrointestinal_hemorrhage	Hepatomegaly	Cerebral_ischemia	Scoliosis	Recurrent_fractures	Kyphosis	Genu_valgum	Elevated_hepatic_transaminase	Abnormality_of_amino_acid_metabolism	Hemiplegia/hemiparesis	Arterial_thrombosis	Venous_thrombosis	Abnormality_of_retinal_pigmentation	Arteriovenous_malformation	Hernia
Lesch-Nyhan_syndrome	Renal_insufficiency	Behavioral_abnormality	Hematuria	Intellectual_disability_mild	Spasticity	Anemia	Gout	Hyperuricemia	Intellectual_disability_moderate	Hemiplegia/hemiparesis	Abnormality_of_movement
Cystinuria	Renal_insufficiency	Nephrolithiasis	Hematuria	Hyperuricemia	Abnormality_of_amino_acid_metabolism
Monosomy_5p	Inguinal_hernia	High_palate	Microcephaly	Epicanthus	Microretrognathia	Round_face	Hypertelorism	Low-set_posteriorly_rotated_ears	Preauricular_skin_tag	Wide_nasal_bridge	Short_neck	Downslanted_palpebral_fissures	Muscular_hypotonia	Intrauterine_growth_retardation	Abnormality_of_the_voice	High_pitched_voice	Malformation_of_the_heart_and_great_vessels	Scoliosis	Recurrent_fractures	Short_stature	Abnormality_of_bone_mineral_density	Joint_hyperflexibility	Finger_syndactyly	Intellectual_disability_severe	Severe_global_developmental_delay	Cat_cry	Small_hand
Hereditary_neuropathy_with_liability_to_pressure_palsies	Hyporeflexia	Vocal_cord_paralysis	Abnormality_of_the_voice	Pes_cavus	Respiratory_insufficiency	Scoliosis	Paresthesia	Decreased_motor_nerve_conduction_velocity	Cranial_nerve_paralysis	Peripheral_neuropathy
Norrie_disease	Cryptorchidism	Thin_vermilion_border	Microcephaly	Malar_flattening	Abnormal_cochlea_morphology	Macrotia	Sensorineural_hearing_impairment	Protruding_ear	Narrow_nasal_bridge	Deeply_set_eye	Glaucoma	Cataract	Chorioretinal_abnormality	Retinal_detachment	Microphthalmia	Hypotelorism	Abnormal_pupil_morphology	Blindness	Nystagmus	Sclerocornea	Optic_atrophy	Behavioral_abnormality	Psychosis	Autism	Stereotypy	Irritability	Hallucinations	Anxiety	Diabetes_mellitus	Delayed_puberty	Ectopia_lentis	Seizures	Muscular_hypotonia	Hypertonia	Muscle_weakness	Hyperreflexia	Failure_to_thrive	Migraine	Cerebral_cortical_atrophy	Clonus	EEG_abnormality	Sleep_disturbance	Developmental_regression	Scoliosis	Cachexia	Abnormal_vitreous_humor_morphology	Venous_insufficiency	Intellectual_disability_progressive	Attention_deficit_hyperactivity_disorder
Alpha-1-antitrypsin_deficiency	Nephrotic_syndrome	Jaundice	Hepatic_failure	Emphysema	Hepatomegaly	Hepatitis
Hyperkalemic_periodic_paralysis	Ophthalmoparesis	Hypertonia	Gait_disturbance	Reduced_tendon_reflexes	Flexion_contracture	Death_in_infancy	Congestive_heart_failure	Malignant_hyperthermia	Respiratory_insufficiency	Hyperkalemia	Fasciculations	Myotonia	Bowel_incontinence	Hypokalemia	Hyponatremia	Myopathy	Skeletal_muscle_atrophy	Elevated_serum_creatine_kinase	Myalgia	Paresthesia	EMG_abnormality	Skeletal_muscle_hypertrophy	Episodic_flaccid_weakness	Periodic_hyperkalemic_paralysis	Feeding_difficulties_in_infancy	Arrhythmia	Cerebral_palsy	Death_in_early_adulthood	Chest_pain
Schwartz-Jampel_syndrome	Inguinal_hernia	Abnormality_of_the_ureter	Abnormality_of_the_urinary_system	Narrow_mouth	Cleft_palate	Pursed_lips	Trismus	High_palate	Everted_lower_lip_vermilion	Microcephaly	Full_cheeks	Low_anterior_hairline	Mask-like_facies	Hypertelorism	Long_philtrum	Micrognathia	Low-set_posteriorly_rotated_ears	Overfolded_helix	Prominent_nasal_bridge	Short_neck	Microcornea	Strabismus	Visual_impairment	Ptosis	Cataract	Abnormal_eyebrow_morphology	Myopia	Blepharophimosis	Abnormality_of_the_pharynx	Blepharospasm	Dental_malocclusion	Irritability	Anxiety	Pectus_excavatum	Pectus_carinatum	Abnormality_of_the_ribs	Nephrolithiasis	Sprengel_anomaly	Platyspondyly	Osteoporosis	Abnormality_of_the_metaphysis	Ectopia_lentis	Wrist_flexion_contracture	Intellectual_disability	Hyporeflexia	Hypertonia	Gait_disturbance	Muscle_weakness	Hip_dysplasia
Diastrophic_dysplasia	Cryptorchidism	Cleft_palate	Macrocephaly	Full_cheeks	Hypertelorism	Micrognathia	Hearing_impairment	Low-set_posteriorly_rotated_ears	Overfolded_helix	Blue_sclerae	Abnormality_of_the_ribs	Abnormality_of_the_clavicle	Abnormality_of_the_metaphysis	Hyperextensible_skin	Abnormality_of_the_metacarpal_bones	Muscular_hypotonia	Joint_dislocation	Hip_dysplasia	Joint_stiffness	Intrauterine_growth_retardation	Respiratory_insufficiency	Recurrent_respiratory_infections	Cerebral_calcification	Scoliosis	Kyphosis	Micromelia	Elbow_dislocation	Abnormal_form_of_the_vertebral_bodies	Depressed_nasal_bridge	Joint_hyperflexibility	Abnormality_of_epiphysis_morphology	Bowing_of_the_long_bones	Hypoplastic_cervical_vertebrae	Neonatal_short-limb_short_stature	Short_finger	Ulnar_deviation_of_finger	Proximal_placement_of_thumb	Large_earlobe	Symphalangism_affecting_the_phalanges_of_the_hand	Increased_bone_mineral_density	Midface_retrusion	Camptodactyly_of_finger	Visceral_angiomatosis
Noonan_syndrome	Cryptorchidism	Hypogonadotrophic_hypogonadism	Abnormality_of_the_genital_system	Thick_lower_lip_vermilion	High_palate	Hypertelorism	Triangular_face	Micrognathia	High_forehead	Low-set_posteriorly_rotated_ears	Thickened_helices	Sensorineural_hearing_impairment	Webbed_neck	Thickened_nuchal_skin_fold	Cystic_hygroma	Strabismus	Downslanted_palpebral_fissures	Ptosis	Proptosis	Nystagmus	Pectus_excavatum	Pectus_carinatum	Melanocytic_nevus	Lymphedema	Brachydactyly	Muscular_hypotonia	Dysarthria	Muscle_weakness	Abnormal_pulmonary_valve_morphology	Abnormality_of_the_spleen	Abnormal_bleeding	Abnormality_of_coagulation	Low_posterior_hairline	Neurological_speech_impairment	Coarse_hair	Hepatomegaly	Malformation_of_the_heart_and_great_vessels	Scoliosis	Delayed_skeletal_maturation	Radioulnar_synostosis	Clinodactyly_of_the_5th_finger	Short_stature	Pulmonary_artery_stenosis	Joint_hyperflexibility	Wide_intermamillary_distance	Abnormal_dermatoglyphics	Feeding_difficulties_in_infancy	Aplasia/Hypoplasia_of_the_abdominal_wall_musculature	Abnormal_hair_quantity
Gorlin_syndrome	Cryptorchidism	Hypogonadotrophic_hypogonadism	Hydrocephalus	Brachycephaly	Epicanthus	Mandibular_prognathia	Hypertelorism	Wide_nasal_bridge	Abnormality_of_the_neck	Strabismus	Glaucoma	Telecanthus	Cataract	Iris_coloboma	Carious_teeth	Melanocytic_nevus	Brachydactyly	Arachnodactyly	Intellectual_disability	Frontal_bossing	Cerebral_calcification	Scoliosis	Neoplasm	Hemivertebrae	Vertebral_fusion	Abnormality_of_the_sense_of_smell	Vertebral_wedging	Palmar_pits	Plantar_pits
46_XY_disorder_of_sex_development_due_to_17-beta-hydroxysteroid_dehydrogenase_3_deficiency	Cryptorchidism	Male_pseudohermaphroditism	Hypogonadotrophic_hypogonadism	Ambiguous_genitalia	Gynecomastia	Infertility	Abnormality_of_the_urethra	Hypothyroidism
Fibrodysplasia_ossificans_progressiva	Hearing_impairment	Glaucoma	Intellectual_disability	Seizures	Limitation_of_joint_mobility	Subcutaneous_nodule	Failure_to_thrive	Alopecia	Hallux_valgus	Anemia	Respiratory_insufficiency	Spinal_rigidity	Abnormal_vertebral_morphology	Clinodactyly_of_the_5th_finger	Abnormality_of_the_first_metatarsal_bone	Aplasia/Hypoplasia_of_the_phalanges_of_the_hallux	Short_hallux	Ectopic_ossification_in_muscle_tissue	Ectopic_ossification_in_ligament_tissue	Synostosis_of_joints
Peutz-Jeghers_syndrome	Abnormality_of_the_ureter	Abnormality_of_the_nose	Multiple_lentigines	Anemia	Vomiting	Abdominal_pain	Rectal_prolapse	Abnormality_of_the_respiratory_system	Gastrointestinal_hemorrhage	Neoplasm	Gastrointestinal_carcinoma	Breast_carcinoma	Intestinal_obstruction	Gastrointestinal_infarctions	Abnormality_of_the_gallbladder	Multiple_renal_cysts	Renal_cell_carcinoma	Pancreatic_adenocarcinoma	Enlarged_polycystic_ovaries	Abnormality_of_the_gastrointestinal_tract	Stomach_cancer	Neoplasm_of_the_nose	Macule	Cervix_cancer	Neoplasm_of_the_colon	Neoplasm_of_the_lung	Biliary_tract_neoplasm	Nasal_polyposis	Melanonychia	Abnormal_pigmentation_of_the_oral_mucosa	Neoplasm_of_the_rectum	Esophageal_neoplasm	Neoplasm_of_the_small_intestine
Pfeiffer_syndrome	Open_mouth	High_palate	Turricephaly	Mandibular_prognathia	Hypertelorism	Short_philtrum	Facial_asymmetry	High_forehead	Wide_nasal_bridge	Short_neck	Ptosis	Brachydactyly	Hip_dysplasia	Hyperlordosis	Clinodactyly_of_the_5th_finger	Short_stature	Synostosis_of_carpal_bones	Finger_syndactyly	Symphalangism_affecting_the_phalanges_of_the_hand	Hypoplasia_of_the_zygomatic_bone	Broad_thumb	Flat_face
Zellweger_syndrome	Multicystic_kidney_dysplasia	Cryptorchidism	Hypospadias	Clitoromegaly	Hydronephrosis	Abnormality_of_the_tongue	High_palate	Microcephaly	Macrocephaly	Wide_anterior_fontanel	Epicanthus	Micrognathia	High_forehead	Sensorineural_hearing_impairment	Wide_nasal_bridge	Thickened_nuchal_skin_fold	Glaucoma	Visual_impairment	Cataract	Chorioretinal_abnormality	Upslanted_palpebral_fissure	Posterior_embryotoxon	Nystagmus	Optic_atrophy	Jaundice	Brushfield_spots	Seizures	Reduced_tendon_reflexes	Hepatic_failure	Failure_to_thrive	Death_in_infancy	Premature_birth	Ventricular_septal_defect	Abnormality_of_coagulation	Pyloric_stenosis	Malabsorption	Respiratory_insufficiency	Polymicrogyria	Hepatomegaly	EEG_abnormality	Skeletal_dysplasia	Short_stature	Depressed_nasal_bridge	Flat_occiput	Severe_muscular_hypotonia	Corneal_opacity	Very_long_chain_fatty_acid_accumulation	Primary_adrenal_insufficiency	External_ear_malformation
WAGR_syndrome	Cryptorchidism	Ambiguous_genitalia	Everted_lower_lip_vermilion	Microcephaly	Micrognathia	Hearing_abnormality	Glaucoma	Visual_impairment	Ptosis	Cataract	Nystagmus	Intellectual_disability	Obesity	Scoliosis	Short_stature	Dysfunction_of_lateral_corticospinal_tracts	Aplasia/Hypoplasia_of_the_iris	Displacement_of_the_urethral_meatus
Waardenburg_syndrome_type_2	Hearing_impairment	Premature_graying_of_hair	Hypopigmentation_of_hair	Sensorineural_hearing_impairment	Hypopigmented_skin_patches	Heterochromia_iridis	White_forelock	Abnormality_of_the_kidney	Telecanthus	Ptosis	Aganglionic_megacolon	Abnormality_of_the_pulmonary_artery
Waardenburg_syndrome_type_3	Microcephaly	Abnormality_of_the_face	Hearing_impairment	Narrow_nasal_bridge	Downslanted_palpebral_fissures	Telecanthus	Thick_eyebrow	Blepharophimosis	Acrocyanosis	Abnormality_of_finger	Intellectual_disability	Spastic_paraplegia	Joint_stiffness	Atrial_septal_defect	Tracheomalacia	Abnormality_of_the_upper_limb	Synostosis_of_carpal_bones	Cutaneous_finger_syndactyly	Tented_upper_lip_vermilion	White_hair	Camptodactyly_of_finger	Atelectasis
Townes-Brocks_syndrome	Cryptorchidism	Hypospadias	Bifid_scrotum	Vesicoureteral_reflux	Abnormality_of_the_kidney	Renal_insufficiency	Ectopic_kidney	Renal_hypoplasia	Abnormality_of_the_uterus	Abnormality_of_the_vagina	Rectovaginal_fistula	Wide_mouth	Facial_asymmetry	Hearing_impairment	Preauricular_skin_tag	Overfolded_helix	Strabismus	Abnormality_of_vision	Cataract	Chorioretinal_coloboma	Microphthalmia	Blepharophimosis	Iris_coloboma	Abnormality_of_the_ribs	Hypothyroidism	Delayed_puberty	Epibulbar_dermoid	Preaxial_hand_polydactyly	Triphalangeal_thumb	Intellectual_disability	Agenesis_of_corpus_callosum	Subcutaneous_nodule	Failure_to_thrive	Anteriorly_placed_anus	Atrial_septal_defect	Tetralogy_of_Fallot	Abnormal_pulmonary_valve_morphology	Patent_ductus_arteriosus	Abnormal_cardiac_septum_morphology	Abnormality_of_the_foot	Pes_planus	Toe_syndactyly	Toe_clinodactyly	Constipation	Anal_atresia	Arnold-Chiari_malformation	Malformation_of_the_heart_and_great_vessels	Bowel_incontinence	Abnormal_vertebral_morphology
Waardenburg_syndrome_type_1	Cleft_palate	Cleft_upper_lip	Mandibular_prognathia	Hearing_impairment	Underdeveloped_nasal_alae	Wide_nasal_bridge	Abnormality_of_the_eye	Strabismus	Abnormality_of_vision	Telecanthus	Ptosis	Thick_eyebrow	Lacrimation_abnormality	Synophrys	Sprengel_anomaly	Hypopigmented_skin_patches	Heterochromia_iridis	Abnormality_of_the_hair	White_forelock	Premature_graying_of_hair	White_eyebrow	White_eyelashes	Aganglionic_megacolon	Spina_bifida	Meningocele	Malformation_of_the_heart_and_great_vessels	Scoliosis	Short_nose	Hypopigmentation_of_hair	Congenital_sensorineural_hearing_impairment	Tented_upper_lip_vermilion	White_hair
Crouzon_disease	Narrow_palate	Hydrocephalus	Brachycephaly	Turricephaly	Hypertelorism	Hypoplasia_of_the_maxilla	High_forehead	Hearing_impairment	Conductive_hearing_impairment	Convex_nasal_ridge	Choanal_atresia	Strabismus	Ptosis	Conjunctivitis	Proptosis	Iris_coloboma	Amblyopia	Optic_atrophy	Abnormal_skull_morphology	Acanthosis_nigricans	Melanocytic_nevus	Hypopigmented_skin_patches	Cerebellar_hypoplasia	Abnormal_facial_shape	Frontal_bossing	Respiratory_insufficiency	Arnold-Chiari_malformation	Headache	Increased_intracranial_pressure	Abnormal_sacrum_morphology	Multiple_suture_craniosynostosis	Narrow_internal_auditory_canal	Midface_retrusion
Cowden_syndrome	Abnormality_of_the_penis	Abnormality_of_the_kidney	Abnormality_of_the_uterus	Macroglossia	High_palate	Furrowed_tongue	Macrocephaly	Hearing_impairment	Cataract	Myopia	Autism	Pectus_excavatum	Gynecomastia	Abnormality_of_the_thyroid_gland	Goiter	Palmoplantar_keratoderma	Melanocytic_nevus	Cavernous_hemangioma	Hypopigmented_skin_patches	Brachydactyly	Intellectual_disability	Seizures	Ataxia	Global_developmental_delay	Abnormal_cerebellum_morphology	Subcutaneous_nodule	Failure_to_thrive	Increased_intracranial_pressure	Scoliosis	Neoplasm	Kyphosis	Meningioma	Melanoma	Breast_carcinoma	Short_stature	Hamartomatous_polyposis	Cellular_immunodeficiency	Renal_cell_carcinoma	Generalized_hyperkeratosis	Follicular_thyroid_carcinoma	Multiple_cafe-au-lait_spots	Neoplasm_of_the_skin	Enlarged_polycystic_ovaries	Adenoma_sebaceum	Fibroma	Lipoma	Bone_cyst	Endometrial_carcinoma	Macule
Crigler-Najjar_syndrome	Hearing_impairment	Ophthalmoparesis	Jaundice	Seizures	Muscular_hypotonia	Lethargy	Abnormality_of_the_liver	Vertigo	Memory_impairment	Encephalitis	Cognitive_impairment
Coffin-Lowry_syndrome	Wide_mouth	Thick_lower_lip_vermilion	Narrow_palate	Open_mouth	High_palate	Everted_lower_lip_vermilion	Microcephaly	Coarse_facial_features	Epicanthus	Hypertelorism	Hypoplasia_of_the_maxilla	Sensorineural_hearing_impairment	Protruding_ear	Wide_nose	Anteverted_nares	Strabismus	Downslanted_palpebral_fissures	Cataract	Optic_atrophy	Hypodontia	Delayed_eruption_of_teeth	Widely_spaced_teeth	Pectus_excavatum	Pectus_carinatum	Abnormal_diaphysis_morphology	Brachydactyly	Large_hands	Tapered_finger	Intellectual_disability	Seizures	Muscular_hypotonia	Hypertonia	Gait_disturbance	Muscle_weakness	Broad_finger	Redundant_skin	Abnormal_mitral_valve_morphology	Abnormal_aortic_valve_morphology	Abnormal_tricuspid_valve_morphology	Pes_planus	Hypoplastic_fingernail	Hyperconvex_fingernails	Frontal_bossing	Ventriculomegaly	Cerebral_cortical_atrophy	Neurological_speech_impairment	Progressive_spasticity	Abnormality_of_neuronal_migration	Scoliosis
Blepharophimosis-ptosis-epicanthus_inversus_syndrome	Epicanthus	Strabismus	Blepharophimosis	Abnormal_lacrimal_duct_morphology	Precocious_menopause	Ptosis	Myopia	Nystagmus	Synophrys	Depressed_nasal_bridge
BOR_syndrome	Ureteropelvic_junction_obstruction	Renal_insufficiency	Cleft_palate	Retrognathia	Hearing_impairment	Preauricular_skin_tag	External_ear_malformation	Renal_hypoplasia/aplasia	Enlarged_cochlear_aqueduct	Multicystic_kidney_dysplasia	Vesicoureteral_reflux	Hydronephrosis	Stenosis_of_the_external_auditory_canal	Atresia_of_the_external_auditory_canal	Abnormality_of_the_middle_ear_ossicles	Hypoplasia_of_the_cochlea	Branchial_cyst	Facial_palsy	Abnormal_lacrimal_duct_morphology
Hereditary_hemorrhagic_telangiectasia	Epistaxis	Cavernous_hemangioma	Cholelithiasis	Seizures	Cirrhosis	Hepatic_failure	Congestive_heart_failure	Pulmonary_arterial_hypertension	Subarachnoid_hemorrhage	Pulmonary_embolism	Transient_ischemic_attack	Spontaneous_hematomas	Abnormality_of_the_cerebral_vasculature	Visceral_angiomatosis	Intestinal_polyposis	Conjunctival_telangiectasia	Amblyopia	Nephrolithiasis	Hematuria	Cholecystitis	Cerebral_hemorrhage	Portal_hypertension	Microcytic_anemia	Esophageal_varix	Migraine	Hemoptysis	Gastrointestinal_hemorrhage	Venous_thrombosis	Retinal_telangiectasia	Abnormality_of_cardiovascular_system_physiology	Arteriovenous_malformation	Mucosal_telangiectasiae	Telangiectasia_of_the_skin	Peripheral_arteriovenous_fistula
Saethre-Chotzen_syndrome	Cryptorchidism	Cleft_palate	Narrow_palate	Brachycephaly	Delayed_cranial_suture_closure	Epicanthus	Low_anterior_hairline	Hypertelorism	Facial_asymmetry	Hypoplasia_of_the_maxilla	Hearing_impairment	Low-set_ears	Conductive_hearing_impairment	Prominent_nasal_bridge	Strabismus	Hypotelorism	Abnormal_skull_morphology	Plagiocephaly	Craniosynostosis	Hallux_valgus	Increased_intracranial_pressure	Malformation_of_the_heart_and_great_vessels	Abnormal_form_of_the_vertebral_bodies	Clinodactyly_of_the_5th_finger	Short_stature	Microtia	Sleep_apnea	Open_bite	Narrow_internal_auditory_canal	High_forehead	Sensorineural_hearing_impairment	Convex_nasal_ridge	Ptosis	Blepharospasm	Amblyopia	Optic_atrophy	Brachydactyly	Triphalangeal_thumb	Seizures	Migraine	Intellectual_disability_moderate	Scoliosis	Hyperlordosis	Proximal_radio-ulnar_synostosis	Depressed_nasal_bridge	Finger_syndactyly	Bilateral_single_transverse_palmar_creases	External_ear_malformation	Abnormality_of_the_antihelix
Beckwith-Wiedemann_syndrome	Tall_stature	Large_for_gestational_age	Neoplasm	Enlarged_kidney	Nephropathy	Wide_mouth	Macroglossia	Prominent_occiput	Coarse_facial_features	Mandibular_prognathia	Abnormality_of_earlobe	Proptosis	Congenital_diaphragmatic_hernia	Melanocytic_nevus	Nevus_flammeus	Choroideremia	Obesity	Hemihypertrophy	Umbilical_hernia	Omphalocele	Polyhydramnios	Redundant_skin	Premature_birth	Exocrine_pancreatic_insufficiency	Hypoglycemia	Neonatal_hypoglycemia	Hypercalciuria	Visceromegaly	Accelerated_skeletal_maturation	Large_placenta	Posterior_helix_pit	Anterior_creases_of_earlobe	Midface_retrusion	Subchorionic_septal_cyst	Asymmetric_growth	Infra-orbital_crease	Abnormality_of_the_shape_of_the_midface	Inguinal_hernia	Cryptorchidism	Ureteral_duplication	Vesicoureteral_reflux	Gonadoblastoma	Cleft_palate	Large_fontanelles	Wide_anterior_fontanel	Facial_hemangioma	Otosclerosis	Nephrolithiasis	Hypothyroidism
Bartter_syndrome	Abnormality_of_metabolism/homeostasis	Short_stature
Albers-Sch√∂nberg_osteopetrosis	Abnormality_of_the_dentition	Hydrocephalus	Macrocephaly	Hearing_impairment	Visual_impairment	Blindness	Optic_atrophy	Carious_teeth	Abnormality_of_the_metaphysis	Abnormality_of_the_metacarpal_bones	Arthritis	Joint_dislocation	Abnormal_leukocyte_morphology	Anemia	Frontal_bossing	Bone_pain	Osteomyelitis	Recurrent_fractures	Osteoarthritis	Genu_valgum	Hypocalcemia	Short_stature	Generalized_osteosclerosis	Abnormality_of_epiphysis_morphology	Cranial_nerve_paralysis	Mandibular_osteomyelitis	Short_distal_phalanx_of_finger	Facial_palsy	Avascular_necrosis
Aicardi_syndrome	Cleft_palate	Cleft_upper_lip	Microcephaly	Short_philtrum	Protruding_ear	Retinal_detachment	Chorioretinal_coloboma	Microphthalmia	Optic_nerve_coloboma	Nystagmus	Optic_atrophy	Delayed_puberty	Precocious_puberty	Bifid_ribs	Rib_fusion	Missing_ribs	Abnormality_of_skin_pigmentation	Multiple_lipomas	Muscular_hypotonia	Spasticity	Hypertonia	Pachygyria	Partial_agenesis_of_the_corpus_callosum	Plagiocephaly	Hip_dysplasia	Constipation	Gastroesophageal_reflux	Malabsorption	Hiatus_hernia	Ventriculomegaly	Polymicrogyria	Intellectual_disability_moderate	EEG_abnormality	Scoliosis	Hepatoblastoma	Block_vertebrae	Butterfly_vertebrae	Hemiplegia/hemiparesis	Sparse_lateral_eyebrow	Supernumerary_ribs	Aplasia/Hypoplasia_of_the_cerebellum	Abnormality_of_retinal_pigmentation	Feeding_difficulties_in_infancy	Premaxillary_Prominence	Intellectual_disability_severe	Moderate_global_developmental_delay	Severe_global_developmental_delay	Infantile_spasms	Intestinal_polyposis
Alagille_syndrome	Cryptorchidism	Abnormality_of_the_ureter	Nephrotic_syndrome	Brachycephaly	Coarse_facial_features	Pointed_chin	Round_face	Hypertelorism	Short_philtrum	Micrognathia	Protruding_ear	Strabismus	Deeply_set_eye	Downslanted_palpebral_fissures	Keratoconus	Abnormal_pupil_morphology	Abnormality_of_the_ribs	Hypertension	Delayed_puberty	Corneal_dystrophy	Intellectual_disability_mild	Specific_learning_disability	Cholestasis	Failure_to_thrive	Intrauterine_growth_retardation	Ventricular_septal_defect	Atrial_septal_defect	Frontal_bossing	Hepatomegaly	Delayed_skeletal_maturation	Hypoplasia_of_the_ulna	Long_nose	Spina_bifida_occulta	Abnormal_form_of_the_vertebral_bodies	Vertebral_segmentation_defect	Clinodactyly_of_the_5th_finger	Butterfly_vertebral_arch	Peripheral_pulmonary_artery_stenosis	Reduced_number_of_intrahepatic_bile_ducts	Renal_hypoplasia/aplasia	Short_distal_phalanx_of_finger	Flat_face	Telangiectasia_of_the_skin
Abetalipoproteinemia	Abnormality_of_the_nervous_system	Acanthocytosis	Steatorrhea	Fat_malabsorption	Abnormal_apolipoprotein_level	Low_levels_of_vitamin_E	Progressive_visual_loss	Color_vision_defect	Nyctalopia	Areflexia	Failure_to_thrive	Anemia	Reticulocytosis	Chronic_diarrhea	Hyperbilirubinemia	Hypoalbuminemia	Hypocholesterolemia	Decreased_HDL_cholesterol_concentration	Myalgia	Decreased_LDL_cholesterol_concentration	Low_levels_of_vitamin_A	Abnormality_of_retinal_pigmentation	Hypotriglyceridemia	Low_levels_of_vitamin_D	Rod-cone_dystrophy	Scotoma	Osteopenia	Ataxia	Dysarthria	Dysmetria	Hepatic_steatosis	Pes_cavus	Talipes_equinovarus	Vomiting	Gait_ataxia	Broad-based_gait	Hepatomegaly	Positive_Romberg_sign	Upper_motor_neuron_dysfunction	Impaired_vibratory_sensation	Kyphoscoliosis	Elevated_hepatic_transaminase	Myopathy	Steppage_gait	Babinski_sign	Impaired_distal_proprioception	Hypopigmentation_of_the_fundus	Prolonged_prothrombin_time	Distal_lower_limb_muscle_weakness
Cat-eye_syndrome	Abnormality_of_the_genital_system	Hydronephrosis	Hypertelorism	Hearing_impairment	Preauricular_skin_tag	Downslanted_palpebral_fissures	Chorioretinal_coloboma	Microphthalmia	Iris_coloboma	Abnormality_of_the_ribs	Muscular_hypotonia	Intellectual_disability_mild	Hip_dysplasia	Intrauterine_growth_retardation	Anal_atresia	Malformation_of_the_heart_and_great_vessels	Short_stature	Preauricular_pit	Renal_hypoplasia/aplasia	Abnormal_localization_of_kidney
Ellis_Van_Creveld_syndrome	Abnormal_morphology_of_female_internal_genitalia	Cryptorchidism	Epispadias	Hypospadias	Abnormality_of_the_ureter	Hydroureter	Abnormality_of_the_kidney	Abnormality_of_the_dentition	Abnormal_oral_frenulum_morphology	Thin_vermilion_border	Strabismus	Hypodontia	Delayed_eruption_of_teeth	Microdontia	Narrow_chest	Abnormality_of_the_skeletal_system	Hand_polydactyly	Abnormal_fingernail_morphology	Capitate-hamate_fusion	Intellectual_disability	Failure_to_thrive	Intrauterine_growth_retardation	Abnormality_of_the_hair	Abnormality_of_the_nail	Ventricular_septal_defect	Atrial_septal_defect	Dextrocardia	Abnormal_heart_valve_morphology	Situs_inversus_totalis	Hypoplastic_toenails	Foot_polydactyly	Emphysema	Nail_dysplasia	Acute_leukemia	Malformation_of_the_heart_and_great_vessels	Abnormality_of_pelvic_girdle_bone_morphology	Delayed_skeletal_maturation	Genu_valgum	Cubitus_valgus	Micromelia	Synostosis_of_carpal_bones	Abnormality_of_bone_marrow_cell_morphology	Atrioventricular_canal_defect	Aplasia/Hypoplasia_of_the_lungs	Renal_hypoplasia/aplasia	Neonatal_short-limb_short_stature	Short_distal_phalanx_of_finger	Short_thorax	Conical_incisor
Jeune_syndrome	Renal_insufficiency	Nephronophthisis	Nephropathy	Abnormality_of_the_sternum	Abnormality_of_the_ribs	Narrow_chest	Abnormality_of_the_clavicle	Abnormality_of_the_metaphysis	Brachydactyly	Postaxial_hand_polydactyly	Abnormality_of_the_liver	Toe_syndactyly	Short_foot	Postaxial_foot_polydactyly	Respiratory_insufficiency	Abnormality_of_pelvic_girdle_bone_morphology	Skeletal_dysplasia	Micromelia	Short_stature	Aplasia/Hypoplasia_of_the_lungs	Abnormality_of_retinal_pigmentation	Feeding_difficulties_in_infancy	Short_thorax	Cone-shaped_epiphysis
Treacher-Collins_syndrome	Cryptorchidism	Scrotal_hypoplasia	Rectovaginal_fistula	Wide_mouth	Narrow_mouth	Glossoptosis	Abnormality_of_the_dentition	Cleft_palate	Cleft_upper_lip	High_palate	Brachycephaly	Malar_flattening	Retrognathia	Low_anterior_hairline	Hypertelorism	Hypoplasia_of_the_maxilla	Micrognathia	Abnormality_of_the_middle_ear	Preauricular_skin_tag	Conductive_hearing_impairment	Wide_nasal_bridge	Choanal_atresia	Strabismus	Downslanted_palpebral_fissures	Visual_impairment	Cataract	Absent_eyelashes	Microphthalmia	Iris_coloboma	Eyelid_coloboma	Blepharospasm	Abnormality_of_dental_eNAME	Hypoplasia_of_the_thymus	Abnormality_of_the_adrenal_glands	Abnormality_of_the_vertebral_column	Global_developmental_delay	Failure_to_thrive	Abnormality_of_the_hair	Patent_ductus_arteriosus	Abnormal_facial_shape	Facial_cleft	Frontal_bossing	Encephalocele	Respiratory_insufficiency	Malformation_of_the_heart_and_great_vessels	Tracheoesophageal_fistula	Abnormality_of_bone_mineral_density	Multiple_enchondromatosis	Thyroid_hypoplasia
Cornelia_de_Lange_syndrome	Multicystic_kidney_dysplasia	Hypoplastic_labia_majora	Vesicoureteral_reflux	Renal_insufficiency	Abnormality_of_the_uterus	Cleft_palate	High_palate	Thin_vermilion_border	Brachycephaly	Microcephaly	Low_anterior_hairline	Long_philtrum	Micrognathia	Low-set_posteriorly_rotated_ears	Macrotia	Conductive_hearing_impairment	Sensorineural_hearing_impairment	Choanal_atresia	Anteverted_nares	Short_neck	Strabismus	Blepharitis	Glaucoma	Cataract	Myopia	Thick_eyebrow	Nystagmus	Synophrys	Phthisis_bulbi	Delayed_eruption_of_teeth	Widely_spaced_teeth	Autism	Obsessive-compulsive_behavior	Pectus_excavatum	Congenital_diaphragmatic_hernia	Primary_amenorrhea	Delayed_puberty	Cutis_marmorata	Intellectual_disability	Seizures	Cryptorchidism	Hypospadias	Atresia_of_the_external_auditory_canal	Microcornea	Ptosis	Long_eyelashes	Anxiety	Muscular_hypotonia	Hypertonia
Holoprosencephaly	Cryptorchidism	Abnormality_of_the_urinary_system	Proteinuria	Median_cleft_lip	Hydrocephalus	Microcephaly	Macrocephaly	Epicanthus	Broad_philtrum	Hypertelorism	Macrotia	Depressed_nasal_tip	Choanal_atresia	Depressed_nasal_ridge	Anosmia	Anteverted_nares	Short_neck	Retinopathy	Deeply_set_eye	Ptosis	Anophthalmia	Chorioretinal_coloboma	Microphthalmia	Thick_eyebrow	Blepharophimosis	Upslanted_palpebral_fissure	Hypotelorism	Iris_coloboma	Optic_atrophy	Synophrys	Congenital_diaphragmatic_hernia	Diabetes_mellitus	Anterior_hypopituitarism	Panhypopituitarism	Diabetes_insipidus	Abnormal_skull_morphology	Brachydactyly	Hand_polydactyly	Seizures	Muscular_hypotonia	Spasticity	Global_developmental_delay	Dandy-Walker_malformation	Muscle_weakness	Dystonia	Holoprosencephaly	Failure_to_thrive_in_infancy	Omphalocele	Ventricular_septal_defect
Apert_syndrome	Cleft_palate	Narrow_palate	Bifid_uvula	Hydrocephalus	Large_fontanelles	Brachyturricephaly	Mandibular_prognathia	Hypertelorism	Facial_asymmetry	Hypoplasia_of_the_maxilla	Broad_forehead	Conductive_hearing_impairment	Sensorineural_hearing_impairment	Convex_nasal_ridge	Choanal_atresia	Strabismus	Downslanted_palpebral_fissures	Visual_impairment	Proptosis	Optic_atrophy	Delayed_eruption_of_teeth	Hypertension	Intellectual_disability	Agenesis_of_corpus_callosum	Absent_septum_pellucidum	Toe_syndactyly	Frontal_bossing	Esophageal_atresia	Respiratory_insufficiency	Ventriculomegaly	Arnold-Chiari_malformation	Malformation_of_the_heart_and_great_vessels	Cloverleaf_skull	Micromelia	Vertebral_segmentation_defect	Ectopic_anus	Acrobrachycephaly	Cervical_vertebrae_fusion_(C5/C6)	Depressed_nasal_bridge	Finger_syndactyly	Feeding_difficulties_in_infancy	Aplasia/Hypoplasia_of_the_thumb	Broad_thumb	Morphological_abnormality_of_the_semicircular_canal	Midface_retrusion	Flat_face	Ovarian_neoplasm	Corneal_erosion
Lamellar_ichthyosis	Renal_insufficiency	Abnormality_of_the_dentition	Everted_lower_lip_vermilion	Chronic_otitis_media	Ectropion	Dry_skin	Hyperkeratosis	Pruritus	Hypotrichosis	Erythroderma	Abnormality_of_the_nail	Dehydration	Recurrent_respiratory_infections	Short_stature	Ichthyosis	Sparse_hair	Abnormality_of_the_helix	Cognitive_impairment	Lack_of_skin_elasticity	Gangrene	Sepsis	Aplasia/Hypoplasia_of_the_eyebrow
Menkes_disease	Bladder_diverticulum	Inguinal_hernia	Abnormal_palate_morphology	Microcephaly	Prominent_occiput	Full_cheeks	Mask-like_facies	Micrognathia	Behavioral_abnormality	Pectus_excavatum	Narrow_chest	Chondrocalcinosis	Osteoporosis	Abnormality_of_the_metaphysis	Dry_skin	Hyperextensible_skin	Atypical_scarring_of_skin	Thickened_skin	Intellectual_disability	Seizures	Muscular_hypotonia	Spasticity	Hypertonia	Muscle_weakness	Intrauterine_growth_retardation	Umbilical_hernia	Hypoglycemia	Nausea_and_vomiting	Malabsorption	Hypothermia	Chorea	Intracranial_hemorrhage	Woolly_hair	Gastrointestinal_hemorrhage	Developmental_regression	Dilatation	Wormian_bones	Osteomyelitis	Recurrent_fractures	Venous_insufficiency	Abnormality_of_the_carotid_arteries	Hypopigmentation_of_hair	Joint_hyperflexibility	Bowing_of_the_long_bones	Prolonged_neonatal_jaundice	Spontaneous_hematomas	Sparse_hair	Tarsal_synostosis	Feeding_difficulties_in_infancy
Microphthalmia_Lenz_type	Cryptorchidism	Hypospadias	Hydroureter	Hydronephrosis	Abnormality_of_the_dentition	Oral_cleft	Microcephaly	Hearing_impairment	Low-set_posteriorly_rotated_ears	Preauricular_skin_tag	Webbed_neck	Microcornea	Glaucoma	Visual_impairment	Cataract	Chorioretinal_coloboma	Microphthalmia	Optic_nerve_coloboma	Iris_coloboma	Nystagmus	Delayed_eruption_of_teeth	Abnormality_of_the_clavicle	Intellectual_disability	Seizures	Neurological_speech_impairment	Malformation_of_the_heart_and_great_vessels	Scoliosis	Kyphosis	Abnormality_of_the_shoulder	Hyperlordosis	Clinodactyly_of_the_5th_finger	Short_stature	Finger_syndactyly	Abnormality_of_dental_morphology	Aplasia/Hypoplasia_of_the_corpus_callosum	External_ear_malformation	Renal_hypoplasia/aplasia	Ankyloblepharon	Complete_duplication_of_thumb_phalanx	Camptodactyly_of_finger	Self-injurious_behavior	Long_thorax
Meckel_syndrome	Multicystic_kidney_dysplasia	Cryptorchidism	Male_pseudohermaphroditism	Ambiguous_genitalia	Urethral_atresia	Ureteral_duplication	Cleft_palate	Furrowed_tongue	Hydrocephalus	Microcephaly	Full_cheeks	Hypertelorism	Sloping_forehead	Micrognathia	Low-set_posteriorly_rotated_ears	Depressed_nasal_ridge	Microcornea	Cataract	Anophthalmia	Chorioretinal_abnormality	Microphthalmia	Sclerocornea	Optic_atrophy	Postaxial_hand_polydactyly	Preaxial_hand_polydactyly	Dandy-Walker_malformation	Oligohydramnios	Situs_inversus_totalis	Pancreatic_cysts	Asplenia	Accessory_spleen	Postaxial_foot_polydactyly	Talipes	Encephalocele	Anencephaly	Malformation_of_the_heart_and_great_vessels	Congenital_hepatic_fibrosis	Bowing_of_the_long_bones	Cystic_liver_disease	Lobar_holoprosencephaly	Aplasia/Hypoplasia_of_the_corpus_callosum	Aplasia/Hypoplasia_of_the_iris	Aplasia/Hypoplasia_of_the_tongue	True_hermaphroditism	Pancreatic_fibrosis
Triose_phosphate-isomerase_deficiency	Decreased_nerve_conduction_velocity	Muscular_hypotonia	Hypertrophic_cardiomyopathy	Skeletal_muscle_atrophy	Diaphragmatic_paralysis	Central_nervous_system_degeneration	Abnormality_of_immune_system_physiology
Monosomy_18p	Short_philtrum	Macrotia	Protruding_ear	Hypodontia	Delayed_speech_and_language_development	Brachydactyly	Intellectual_disability	Global_developmental_delay	Short_stature	Abnormality_of_the_antihelix	Cleft_palate	Brachycephaly	Microcephaly	Epicanthus	Micrognathia	Wide_nasal_bridge	Webbed_neck	Short_neck	Ptosis	Carious_teeth	Misalignment_of_teeth	Pectus_excavatum	Hypertension	Muscular_hypotonia	Low_posterior_hairline	Downturned_corners_of_mouth	Kyphoscoliosis	Wide_intermamillary_distance	Enlarged_thorax	Microphthalmia	Behavioral_abnormality	Hypothyroidism	Lymphedema	Holoprosencephaly	Alopecia	Malformation_of_the_heart_and_great_vessels	Autoimmunity	Generalized_dystonia
Distal_monosomy_7q36	Cryptorchidism	Wide_mouth	Cleft_palate	Microcephaly	Full_cheeks	Micrognathia	Macrotia	Bulbous_nose	Short_neck	Strabismus	Upslanted_palpebral_fissure	Optic_atrophy	Pectus_excavatum	Seizures	Muscular_hypotonia	Hypertonia	Holoprosencephaly	Abnormality_of_calvarial_morphology	Clinodactyly_of_the_5th_finger	Short_stature	Wide_intermamillary_distance	Intellectual_disability_borderline	Bilateral_single_transverse_palmar_creases	Hypoplasia_of_penis	Symphalangism_affecting_the_phalanges_of_the_hand	Abnormality_of_immune_system_physiology	Flat_face	Non-midline_cleft_lip	Large_face	Hernia
Distal_monosomy_9p	Hypospadias	Hypoplastic_labia_majora	Abnormality_of_the_dentition	Cleft_palate	Trigonocephaly	Epicanthus	Hypertelorism	Low-set_posteriorly_rotated_ears	Wide_nasal_bridge	Short_neck	Proptosis	Upslanted_palpebral_fissure	Brachydactyly	Intellectual_disability	Muscular_hypotonia	Global_developmental_delay	Malformation_of_the_heart_and_great_vessels	High_narrow_palate	Short_nose	Wide_intermamillary_distance	Microtia	Abnormality_of_the_antihelix	Aplasia/Hypoplasia_of_the_earlobes	Abnormality_of_the_helix	Midface_retrusion	Enlarged_thorax	Hernia
Trisomy_13	Abnormal_morphology_of_female_internal_genitalia	Cryptorchidism	Abnormality_of_the_ureter	Hydronephrosis	Median_cleft_lip	Abnormality_of_the_dentition	Cleft_palate	Abnormality_of_the_fontanelles_or_cranial_sutures	Long_philtrum	Low-set_ears	Preauricular_skin_tag	Sensorineural_hearing_impairment	Cystic_hygroma	Deeply_set_eye	Abnormal_eyelash_morphology	Abnormality_of_vision	Cataract	Anophthalmia	Microphthalmia	Iris_coloboma	Optic_atrophy	Narrow_chest	Skull_defect	Intrauterine_growth_retardation	Ventricular_septal_defect	Atrial_septal_defect	Hydrops_fetalis	Abnormal_lung_lobation	Neurological_speech_impairment	Arnold-Chiari_malformation	Malformation_of_the_heart_and_great_vessels	Abnormality_of_pelvic_girdle_bone_morphology	Scoliosis	High_narrow_palate	Preauricular_pit	Abnormal_dermatoglyphics	Bilateral_single_transverse_palmar_creases	Abnormal_retinal_vascular_morphology	Aplasia/Hypoplasia_of_the_iris	Severe_global_developmental_delay	Ectrodactyly	Cognitive_impairment	Malar_flattening	Abnormality_of_the_middle_ear	Abnormality_of_the_eye	Hypotelorism	Abnormality_of_the_ribs	Postaxial_hand_polydactyly	Seizures
Distal_trisomy_15q	Cryptorchidism	Tall_stature	High_palate	Microcephaly	Sloping_forehead	Long_philtrum	Micrognathia	Prominent_nasal_bridge	Ptosis	Blepharophimosis	Pectus_excavatum	Arachnodactyly	Intellectual_disability	Seizures	Hypertonia	Joint_stiffness	Omphalocele	Anal_atresia	Congenital_muscular_torticollis	Camptodactyly_of_finger	Abnormality_of_female_external_genitalia	Facial_asymmetry	Abnormality_of_periauricular_region	Short_neck	Downslanted_palpebral_fissures	Muscular_hypotonia	Intrauterine_growth_retardation	Malformation_of_the_heart_and_great_vessels	Downturned_corners_of_mouth
Trisomy_18	Abnormal_morphology_of_female_internal_genitalia	Cryptorchidism	Hydronephrosis	Narrow_mouth	Cleft_palate	Narrow_palate	Abnormality_of_the_fontanelles_or_cranial_sutures	Microcephaly	Dolichocephaly	Prominent_occiput	Narrow_face	Epicanthus	Microretrognathia	Hypertelorism	Triangular_face	Broad_forehead	High_forehead	Low-set_posteriorly_rotated_ears	Choanal_atresia	Webbed_neck	Microcornea	Glaucoma	Cataract	Microphthalmia	Blepharophimosis	Iris_coloboma	Abnormality_of_the_ribs	Congenital_diaphragmatic_hernia	Postaxial_hand_polydactyly	Muscular_hypotonia	Global_developmental_delay	Hypertonia	Holoprosencephaly	Growth_delay	Intrauterine_growth_retardation	Omphalocele	Oligohydramnios	Ventricular_septal_defect	Atrial_septal_defect	Anal_atresia	Esophageal_atresia	Arnold-Chiari_malformation	Anencephaly	Spina_bifida	Malformation_of_the_heart_and_great_vessels	Delayed_skeletal_maturation	Abnormality_of_the_lower_limb	Abnormality_of_the_upper_limb	Short_nose
Distal_trisomy_18q	Cryptorchidism	Abnormality_of_female_external_genitalia	High_palate	Dolichocephaly	Round_face	Triangular_face	Micrognathia	Low-set_posteriorly_rotated_ears	Prominent_nasal_bridge	Choanal_atresia	Anteverted_nares	Short_neck	Thickened_nuchal_skin_fold	Iris_coloboma	Carious_teeth	Pectus_excavatum	Arachnodactyly	Large_hands	Global_developmental_delay	Malformation_of_the_heart_and_great_vessels	Short_nose	Deviation_of_finger	Clinodactyly_of_the_5th_finger	Progressive_intervertebral_space_narrowing	Abnormality_of_dental_morphology	Abnormal_dermatoglyphics	Bilateral_single_transverse_palmar_creases	Hypoplasia_of_penis	Abnormal_hair_pattern	Camptodactyly_of_finger	Cognitive_impairment
Albinism-deafness_syndrome	Sensorineural_hearing_impairment	Hypopigmented_skin_patches	Heterochromia_iridis	Neurological_speech_impairment	Irregular_hyperpigmentation	Partial_albinism	Piebaldism
Ermine_phenotype	Microcephaly	Abnormality_of_the_nose	Sensorineural_hearing_impairment	Astigmatism	Photophobia	Nystagmus	Hypopigmented_skin_patches	Ocular_albinism	Muscular_hypotonia	Intellectual_disability_mild	Toe_syndactyly	Clinodactyly_of_the_5th_finger	Short_stature	Hypopigmentation_of_hair	Irregular_hyperpigmentation	Iris_hypopigmentation
Ocular_albinism_with_late-onset_sensorineural_deafness	Sensorineural_hearing_impairment	Strabismus	Visual_impairment	Photophobia	Nystagmus	Ocular_albinism
Oculocutaneous_albinism	Abnormality_of_refraction	Photophobia	Nystagmus	Cutaneous_photosensitivity	Generalized_hypopigmentation	Reduced_visual_acuity	Iris_hypopigmentation	Hypoplasia_of_the_fovea	Hypopigmentation_of_the_fundus	Strabismus	Hypopigmentation_of_the_skin	Ocular_albinism	White_eyebrow	White_eyelashes	Hypopigmentation_of_hair	Squamous_cell_carcinoma_of_the_skin	Generalized_hypopigmentation_of_hair	White_hair	Absent_skin_pigmentation	Red_hair	Basal_cell_carcinoma
Bruck_syndrome	Triangular_face	Platyspondyly	Osteoporosis	Pterygium	Joint_stiffness	Talipes_equinovarus	Respiratory_insufficiency	Wormian_bones	Scoliosis	Recurrent_fractures	Arthrogryposis_multiplex_congenita	Kyphosis	Short_stature	Bowing_of_the_long_bones
Darier_disease	Palmoplantar_keratoderma	Pruritus	Abnormality_of_skin_pigmentation	Hypermelanotic_macule	Thickened_skin	Abnormality_of_the_hair	Abnormality_of_the_nail	Anal_mucosal_leukoplakia	Subungual_hyperkeratotic_fragments	Plantar_pits	Macule	Acrokeratosis	Skin_vesicle
46_XY_disorder_of_sex_development_due_to_5-alpha-reductase_2_deficiency	Cryptorchidism	Ambiguous_genitalia_male	Scrotal_hypoplasia	Bifid_scrotum	Perineal_hypospadias	Ambiguous_genitalia	Decreased_fertility	Abnormality_of_the_endocrine_system	Hypoplasia_of_penis	Urogenital_sinus_anomaly
Isolated_complex_I_deficiency	Decreased_activity_of_mitochondrial_complex_I	Proximal_tubulopathy	Sensorineural_hearing_impairment	Strabismus	Ptosis	Optic_disc_pallor	Nystagmus	Poor_eye_contact	Optic_neuropathy	Ataxia	Muscular_hypotonia	Lethargy	Global_developmental_delay	Encephalopathy	Muscle_weakness	Failure_to_thrive	Intrauterine_growth_retardation	Hypertrophic_cardiomyopathy	Hypoglycemia	Vomiting	Respiratory_insufficiency	Hepatomegaly	Leukoencephalopathy	Leukodystrophy	Poor_head_control	Increased_CSF_lactate	Lactic_acidosis	Increased_serum_pyruvate	Mitochondrial_myopathy	Paroxysmal_involuntary_eye_movements	Abnormal_mitochondria_in_muscle_tissue	Focal_T2_hyperintense_brainstem_lesion	Microcephaly	Blindness	Diabetes_mellitus	Feeding_difficulties	Fetal_distress
Bethlem_myopathy	Muscle_weakness	Flexion_contracture	EMG:_myopathic_abnormalities	Muscular_dystrophy	Progressive_proximal_muscle_weakness	Reduced_muscle_collagen_VI	Neck_muscle_weakness	Interphalangeal_joint_contracture_of_finger	Wrist_flexion_contracture	Gait_disturbance	Difficulty_walking	Distal_muscle_weakness	Multiple_joint_contractures	Elevated_serum_creatine_kinase	Limb-girdle_muscle_weakness	Quadriceps_muscle_weakness	Ankle_flexion_contracture	Increased_muscle_lipid_content	Camptodactyly_of_finger	Hyperkeratosis	Cigarette-paper_scars	Joint_hypermobility	Achilles_tendon_contracture	Abnormality_of_the_respiratory_system	Waddling_gait	Scoliosis	Hypoventilation	Lumbar_hyperlordosis	Elbow_flexion_contracture	Spinal_rigidity	Axial_muscle_weakness	Gowers_sign	Scapular_winging	Generalized_amyotrophy	Rimmed_vacuoles	Foot_dorsiflexor_weakness	Curved_toe_phalanx	Reduced_maximal_expiratory_pressure	Keratosis_pilaris
Pentasomy_X	Microcephaly	Hypertelorism	Low-set_posteriorly_rotated_ears	Wide_nasal_bridge	Strabismus	Upslanted_palpebral_fissure	Delayed_puberty	Intellectual_disability	Muscular_hypotonia	Global_developmental_delay	Plagiocephaly	Hip_dysplasia	Patent_ductus_arteriosus	Abnormal_cardiac_septum_morphology	Short_foot	Radioulnar_synostosis	Clinodactyly_of_the_5th_finger	Abnormality_of_immune_system_physiology	Camptodactyly_of_finger	Small_hand	Micrognathia	Short_stature
Osteogenesis_imperfecta-retinopathy-seizures-intellectual_disability_syndrome	Abnormality_of_the_eye	Abnormality_of_vision	Optic_atrophy	Intellectual_disability	Seizures	Wormian_bones	Recurrent_fractures	Severe_global_developmental_delay
Congenital_osteogenesis_imperfecta-microcephaly-cataracts_syndrome	Cryptorchidism	Ambiguous_genitalia	Microcephaly	Hypertelorism	Low-set_posteriorly_rotated_ears	Cataract	Blue_sclerae	Abnormality_of_the_ribs	Single_umbilical_artery	Intrauterine_growth_retardation	Ventricular_septal_defect	Ventriculomegaly	Abnormality_of_neuronal_migration	Recurrent_fractures	Micromelia	Hypoplastic_left_heart	Decreased_calvarial_ossification	Joint_hyperflexibility	Aplasia/Hypoplasia_of_the_cerebellum	Hypoplasia_of_penis	Disproportionate_short-limb_short_stature
Large_congenital_melanocytic_nevus	Hydrocephalus	Pruritus	Abnormality_of_skin_pigmentation	Hypopigmented_skin_patches	Seizures	Subcutaneous_nodule	Generalized_hirsutism	Neoplasm	Rhabdomyosarcoma	Nevus	Congenital_giant_melanocytic_nevus	Neoplasm_of_the_skin	Cutaneous_melanoma	Sarcoma
Trisomy_9p	Brachycephaly	Microcephaly	Hypertelorism	Macrotia	Protruding_ear	Short_neck	Deeply_set_eye	Downslanted_palpebral_fissures	Abnormal_pupil_morphology	Dental_crowding	Sacral_dimple	Brachydactyly	Intellectual_disability	Global_developmental_delay	Hypoplastic_toenails	Hypoplastic_fingernail	Scoliosis	Downturned_corners_of_mouth	Kyphosis	Clinodactyly_of_the_5th_finger	Abnormal_nasal_morphology	Wide_intermamillary_distance	Abnormal_dermatoglyphics	Bilateral_single_transverse_palmar_creases	Impacted_tooth	Non-midline_cleft_lip	Fingernail_dysplasia
22q11.2_duplication_syndrome	Hydronephrosis	Cleft_palate	Microcephaly	Narrow_face	Epicanthus	Hypertelorism	Smooth_philtrum	Micrognathia	High_forehead	Hearing_impairment	Wide_nose	Depressed_nasal_ridge	Downslanted_palpebral_fissures	Ptosis	Abnormality_of_the_pharynx	Autism	Obsessive-compulsive_behavior	Stereotypy	Anxiety	Delayed_speech_and_language_development	Intellectual_disability	Seizures	Muscular_hypotonia	Global_developmental_delay	Growth_delay	Nasal_speech	Ventricular_septal_defect	Tetralogy_of_Fallot	Transposition_of_the_great_arteries	Neurological_speech_impairment	Scoliosis	Hypoplastic_left_heart	Attention_deficit_hyperactivity_disorder	Urethral_stenosis	Anterior_creases_of_earlobe	Aplasia/Hypoplasia_of_the_thymus	Abnormality_of_immune_system_physiology	Interrupted_aortic_arch	Midface_retrusion	Displacement_of_the_urethral_meatus
Tetrasomy_18p	Narrow_mouth	Thin_vermilion_border	Microcephaly	Abnormality_of_the_face	Epicanthus	Facial_asymmetry	Long_philtrum	Low-set_posteriorly_rotated_ears	Downslanted_palpebral_fissures	Large_hands	Intellectual_disability	Seizures	Syncope	Gait_disturbance	Abnormality_of_neuronal_migration	Achalasia	Scoliosis	Short_nose
Incontinentia_pigmenti	Oral_cleft	Hearing_abnormality	Strabismus	Keratitis	Visual_impairment	Cataract	Chorioretinal_abnormality	Retinal_detachment	Uveitis	Microphthalmia	Retinal_hemorrhage	Blue_sclerae	Hypodontia	Abnormality_of_dental_eNAME	Delayed_eruption_of_teeth	Hyperkeratosis	Hyperhidrosis	Skin_rash	Abnormality_of_skin_pigmentation	Hypopigmented_skin_patches	Abnormal_fingernail_morphology	Intellectual_disability	Seizures	Muscular_hypotonia	Spasticity	Global_developmental_delay	Gait_disturbance	Umbilical_hernia	Abnormality_of_the_hair	Alopecia	Abnormality_of_the_nail	Congestive_heart_failure	Hypoplastic_fingernail	Dystrophic_toenail	Broad_nail	Eosinophilia	Pulmonary_arterial_hypertension	Cerebral_cortical_atrophy	Encephalitis	Supernumerary_nipple	Cerebral_ischemia	Scoliosis	Osteolysis	Spina_bifida_occulta	Absent_hand	Deviation_of_finger	Short_stature	Hemiplegia/hemiparesis	Supernumerary_ribs
Neurodegeneration_with_brain_iron_accumulation	Retinopathy	Optic_atrophy	Spasticity	Dysarthria	Cerebellar_atrophy	Dystonia	Rigidity	Abnormality_of_extrapyramidal_motor_function	Chorea	Iron_accumulation_in_brain
Hereditary_orotic_aciduria	Abnormality_of_the_ureter	Hypertelorism	Low-set_posteriorly_rotated_ears	Wide_nasal_bridge	Downslanted_palpebral_fissures	Global_developmental_delay	Hip_dysplasia	Patent_ductus_arteriosus	Splenomegaly	Anemia	Recurrent_respiratory_infections	Oroticaciduria	Aminoaciduria	Orotic_acid_crystalluria	Impaired_T_cell_function	Abnormal_toenail_morphology
Acrocallosal_syndrome	Inguinal_hernia	Cryptorchidism	Hypospadias	Tall_stature	Macrocephaly	Wide_anterior_fontanel	Prominent_occiput	Hypertelorism	Sloping_forehead	Sensorineural_hearing_impairment	Congenital_diaphragmatic_hernia	Abnormality_of_the_clavicle	Postaxial_hand_polydactyly	Triphalangeal_thumb	Dandy-Walker_malformation	Aplasia/Hypoplasia_of_the_cerebellum	Aplasia/Hypoplasia_of_the_corpus_callosum	Intellectual_disability_severe
Succinic_semialdehyde_dehydrogenase_deficiency	Behavioral_abnormality	Intellectual_disability	Ataxia	Muscular_hypotonia	Global_developmental_delay	Abnormality_of_metabolism/homeostasis	Generalized_tonic-clonic_seizures	Generalized_myoclonic_seizures	Status_epilepticus
Mevalonic_aciduria	Large_fontanelles	Microcephaly	Dolichocephaly	Triangular_face	Low-set_posteriorly_rotated_ears	Downslanted_palpebral_fissures	Cataract	Blue_sclerae	Intellectual_disability	Seizures	Ataxia	Muscular_hypotonia	Global_developmental_delay	Splenomegaly	Cerebral_cortical_atrophy	Delayed_skeletal_maturation	Short_stature
Neonatal_adrenoleukodystrophy	Abnormal_palate_morphology	Macrocephaly	Dolichocephaly	Low-set_posteriorly_rotated_ears	Sensorineural_hearing_impairment	Anteverted_nares	Strabismus	Visual_impairment	Ptosis	Nystagmus	Optic_atrophy	Seizures	Muscular_hypotonia	Hyperreflexia	Abnormality_of_the_liver	Abnormality_of_metabolism/homeostasis	Abnormality_of_neuronal_migration	EEG_abnormality	Developmental_regression	Short_stature	Bilateral_single_transverse_palmar_creases	Wide_anterior_fontanel	High_forehead	Wide_nasal_bridge	Cataract	Abnormality_of_retinal_pigmentation	Primary_adrenal_insufficiency	Severe_global_developmental_delay	Abnormality_of_movement
Alkaptonuria	Prostatitis	Hearing_abnormality	Abnormality_of_the_nose	Abnormality_of_the_eye	Abnormality_of_vision	Blue_sclerae	Nephrolithiasis	Hypertension	Abnormality_of_skin_pigmentation	Arthritis	Joint_dislocation	Joint_swelling	Joint_stiffness	Abnormality_of_the_nail	Abnormal_heart_valve_morphology	Myocardial_infarction	Coronary_artery_calcification	Atherosclerosis	Osteoarthritis	Arthralgia	Aminoaciduria	Reduced_bone_mineral_density	Aortic_valve_calcification	Mitral_valve_calcification	Thickened_Achilles_tendon	Intervertebral_disk_calcification	Irregular_hyperpigmentation	Tendon_rupture	Calcification_of_cartilage	Cartilage_destruction
Nager_syndrome	Unilateral_renal_agenesis	Wide_mouth	Abnormal_palate_morphology	Cleft_palate	Hypoplasia_of_the_maxilla	Micrognathia	Hearing_impairment	Low-set_posteriorly_rotated_ears	Atresia_of_the_external_auditory_canal	Downslanted_palpebral_fissures	Ptosis	Lower_eyelid_coloboma	Delayed_speech_and_language_development	Triphalangeal_thumb	Joint_stiffness	Respiratory_insufficiency	Malformation_of_the_heart_and_great_vessels	Skeletal_dysplasia	Abnormality_of_the_lower_limb	Hypoplasia_of_the_radius	Abnormal_nasal_morphology	Aplasia/Hypoplasia_of_the_radius	Sparse_lower_eyelashes	Microtia	Aplasia/Hypoplasia_of_the_thumb	Phocomelia	Hypoplasia_of_the_zygomatic_bone	Non-midline_cleft_lip	Aplasia/Hypoplasia_of_the_eyebrow
Acromegaly	Long_penis	Tall_stature	Macroglossia	Thick_lower_lip_vermilion	Long_face	Coarse_facial_features	Full_cheeks	Mandibular_prognathia	Broad_forehead	Macrotia	Wide_nose	Abnormality_of_the_endocrine_system	Anterior_hypopituitarism	Growth_hormone_excess	Hyperhidrosis	Thickened_skin	Large_hands	Tapered_finger	Joint_swelling	Broad_foot	Deep_plantar_creases	Osteoarthritis	Arthralgia	Cortical_diaphyseal_thickening_of_the_upper_limbs	Macrodactyly	Deep_palmar_crease	Pituitary_growth_hormone_cell_adenoma	Fatigue	Hypogonadotrophic_hypogonadism	Abnormality_of_the_dentition	Synophrys	Widely_spaced_teeth	Depressivity	Anxiety	Diabetes_mellitus	Hypertension	Abnormal_fingernail_morphology	Hoarse_voice	Frontal_bossing	Migraine	Generalized_hirsutism	Kyphosis	Paresthesia	Spinal_canal_stenosis	Abnormal_toenail_morphology	Sleep_apnea	Broad_jaw	Cerebral_palsy	Palpebral_edema
Smith-Magenis_syndrome	Abnormality_of_the_ureter	Cleft_palate	Open_mouth	Cleft_upper_lip	Brachycephaly	Microcephaly	Mandibular_prognathia	Hypertelorism	Short_philtrum	Broad_forehead	Micrognathia	Chronic_otitis_media	Conductive_hearing_impairment	Wide_nasal_bridge	Anteverted_nares	Microcornea	Strabismus	Deeply_set_eye	Retinal_detachment	Myopia	Upslanted_palpebral_fissure	Synophrys	Taurodontia	Delayed_eruption_of_primary_teeth	Stereotypy	Anxiety	Delayed_speech_and_language_development	Hypothyroidism	Delayed_puberty	Precocious_puberty	Brachydactyly	Hand_polydactyly	Intellectual_disability	Seizures	Muscular_hypotonia	Global_developmental_delay	Hyporeflexia	Gait_disturbance	Joint_stiffness	Obesity	Failure_to_thrive_in_infancy	Decreased_fetal_movement	Hoarse_voice	Pes_planus	Toe_syndactyly	Frontal_bossing	Constipation	Gastroesophageal_reflux	Ventriculomegaly
Tetrasomy_X	Abnormality_of_the_dentition	Epicanthus	Hypertelorism	Strabismus	Upslanted_palpebral_fissure	Brachydactyly	Muscular_hypotonia	Global_developmental_delay	Specific_learning_disability	Hip_dysplasia	Malformation_of_the_heart_and_great_vessels	Radioulnar_synostosis	Clinodactyly_of_the_5th_finger	Joint_hyperflexibility	Abnormality_of_immune_system_physiology	Cognitive_impairment	Precocious_menopause
Refsum_disease	Renal_insufficiency	Anosmia	Abnormality_of_the_eye	Retinopathy	Abnormality_of_eye_movement	Abnormality_of_vision	Visual_impairment	Ptosis	Cataract	Progressive_visual_loss	Microphthalmia	Nystagmus	Nyctalopia	Dry_skin	Ataxia	Cardiomyopathy	Splenomegaly	Sensorineural_hearing_impairment	Miosis	Muscular_hypotonia	Abnormality_of_the_foot	Pes_cavus	Hammertoe	Abnormality_of_metabolism/homeostasis	Respiratory_insufficiency	Nail_dysplasia	Developmental_regression	Skeletal_dysplasia	Skeletal_muscle_atrophy	Hemiplegia/hemiparesis	Abnormality_of_epiphysis_morphology	Abnormal_pyramidal_sign	Abnormality_of_retinal_pigmentation	Ichthyosis	Peripheral_neuropathy	Short_metacarpal	Intellectual_disability_severe	Heart_block
Retinitis_pigmentosa-intellectual_disability-deafness-hypogonadism_syndrome	Cryptorchidism	Polycystic_ovaries	Coarse_facial_features	Sensorineural_hearing_impairment	Visual_impairment	Cataract	Nystagmus	Gynecomastia	Hypergonadotropic_hypogonadism	Hyperinsulinemia	Secondary_amenorrhea	Acanthosis_nigricans	Dry_skin	Brachydactyly	Intellectual_disability	Cerebellar_atrophy	Obesity	Broad_foot	Short_toe	Delayed_skeletal_maturation	Kyphosis	Hyperlordosis	Short_stature	Type_II_diabetes_mellitus	Abnormality_of_retinal_pigmentation	Decreased_testicular_size	Keloids
Isovaleric_acidemia	Seizures	Global_developmental_delay	Metabolic_acidosis
Aarskog-Scott_syndrome	Inguinal_hernia	Cryptorchidism	Shawl_scrotum	Abnormality_of_the_dentition	Cleft_palate	Oral_cleft	Cleft_upper_lip	Everted_lower_lip_vermilion	Epicanthus	Round_face	Hypertelorism	Hypoplasia_of_the_maxilla	Broad_forehead	Long_philtrum	Low-set_posteriorly_rotated_ears	Wide_nasal_bridge	Anteverted_nares	Short_neck	Megalocornea	Strabismus	Downslanted_palpebral_fissures	Ptosis	Delayed_eruption_of_teeth	Behavioral_abnormality	Pectus_excavatum	Single_transverse_palmar_crease	Hyperextensible_skin	Broad_palm	Umbilical_hernia	Congestive_heart_failure	Pes_planus	Broad_foot	Short_foot	Talipes	Malformation_of_the_heart_and_great_vessels	Genu_recurvatum	Abnormality_of_the_cervical_spine	Clinodactyly_of_the_5th_finger	Short_palm	Short_stature	Abnormal_vertebral_segmentation_and_fusion	Joint_hyperflexibility	Finger_syndactyly	Attention_deficit_hyperactivity_disorder	External_ear_malformation	High_anterior_hairline	Camptodactyly_of_finger	Cognitive_impairment	Small_hand
Chronic_mucocutaneous_candidiasis	Recurrent_urinary_tract_infections	Abnormality_of_the_vagina	Abnormality_of_the_mouth	Abnormal_lip_morphology	Abnormality_of_the_eye	Abnormality_of_vision	Abnormality_of_dental_eNAME	Hematuria	Abnormality_of_the_skin	Hyperkeratosis	Skin_rash	Pruritus	Abnormal_fingernail_morphology	Seizures	Abnormality_of_the_nail	Broad_nail	Hemoptysis	Recurrent_respiratory_infections	Abnormality_of_the_immune_system	Recurrent_infections	Abnormality_of_the_endocardium	Abnormality_of_temperature_regulation	Abnormal_toenail_morphology	Feeding_difficulties_in_infancy	Erythema	Hepatitis	Cough	Dyspareunia	Cheilitis	Papule	Skin_ulcer
Caffey_disease	Facial_asymmetry	Proptosis	Behavioral_abnormality	Fever	Respiratory_insufficiency	Scoliosis	Calvarial_hyperostosis	Cortical_irregularity	Cortical_thickening_of_long_bone_diaphyses	Periosteal_thickening_of_long_tubular_bones	Feeding_difficulties_in_infancy	Increased_antibody_level_in_blood	Cellulitis	Hyperesthesia
Arthrogryposis-oculomotor_limitation-electroretinal_anomalies_syndrome	Inguinal_hernia	Triangular_face	Macrotia	Deeply_set_eye	Visual_impairment	Ptosis	Abnormal_electroretinogram	Ophthalmoplegia	Optic_atrophy	Pectus_excavatum	Arachnodactyly	Joint_stiffness	Bilateral_talipes_equinovarus	Deviation_of_finger	Congenital_finger_flexion_contractures	Absent_palmar_crease	Chin_dimple
Sheldon-Hall_syndrome	High_palate	Narrow_face	Micrognathia	Protruding_ear	Wide_nasal_bridge	Webbed_neck	Short_neck	Adducted_thumb	Joint_stiffness	Scoliosis	Ulnar_deviation_of_the_wrist	Abnormality_of_the_hip_bone	Vertebral_segmentation_defect	Short_stature	Aplasia/Hypoplasia_of_the_radius	Bilateral_single_transverse_palmar_creases	Tarsal_synostosis	Ulnar_deviation_of_finger	Overlapping_fingers	Round_ear
Arrhinia-choanal_atresia-microphthalmia_syndrome	Inguinal_hernia	Hypogonadotrophic_hypogonadism	Cleft_palate	High_palate	Hypertelorism	Choanal_atresia	Microphthalmia	Lacrimation_abnormality	Abnormality_of_the_sense_of_smell	Reduced_number_of_teeth	Aplasia/Hypoplasia_involving_the_nose	Midface_retrusion
Argininemia	Behavioral_abnormality	Seizures	Global_developmental_delay	Hyperammonemia	Neurological_speech_impairment	EEG_abnormality	Progressive_spastic_quadriplegia	Hemiplegia/hemiparesis	Diaminoaciduria	Intellectual_disability_severe
Distal_arthrogryposis_type_1	Narrow_mouth	Adducted_thumb	Joint_stiffness	Rocker_bottom_foot	Talipes	Abnormality_of_the_hip_bone	Ulnar_deviation_of_finger	Overlapping_fingers	Camptodactyly_of_finger
Lethal_hemolytic_anemia-genital_anomalies_syndrome	Hypospadias	Abnormality_of_the_ureter	Narrow_mouth	Thin_vermilion_border	Microcephaly	Micrognathia	Depressed_nasal_ridge	Abnormal_skull_morphology	Muscular_hypotonia	Ascites	Polyhydramnios	Oligohydramnios	Splenomegaly	Sandal_gap	Anemia	Abnormality_of_coagulation	Respiratory_insufficiency	Aplasia/Hypoplasia_of_the_lungs	Renal_hypoplasia/aplasia	Hypoplasia_of_penis
Alopecia_antibody_deficiency	Conductive_hearing_impairment	Abnormal_eyelash_morphology	Neurological_speech_impairment	Recurrent_respiratory_infections	Sparse_body_hair	Immunodeficiency	Decreased_antibody_level_in_blood	Short_stature	Sparse_hair	Abnormality_of_dental_color	Aplasia/Hypoplasia_of_the_eyebrow
Aniridia-cerebellar_ataxia-intellectual_disability_syndrome	Mask-like_facies	Hearing_abnormality	Aniridia	Intellectual_disability	Ataxia	Muscular_hypotonia	Global_developmental_delay	Neurological_speech_impairment	Scanning_speech	Abnormality_of_the_pulmonary_artery	Abnormality_of_movement
Blue_rubber_bleb_nevus	Skin_rash	Cavernous_hemangioma	Subcutaneous_nodule	Abnormality_of_coagulation	Microcytic_anemia	Volvulus	Intestinal_bleeding	Abnormality_of_the_vasculature	Bone_pain	Prolonged_bleeding_time	Gastrointestinal_infarctions	Arteriovenous_malformation	Visceral_angiomatosis
Isolated_Dandy-Walker_malformation	Cleft_palate	Prominent_occiput	Dandy-Walker_malformation	Abnormality_of_the_cardiovascular_system	Tetralogy_of_Fallot	Frontal_bossing	Encephalocele	Platybasia	Aplasia/Hypoplasia_of_the_corpus_callosum
Dihydropteridine_reductase_deficiency	Microcephaly	Intellectual_disability	Global_developmental_delay	Dysphagia
Argininosuccinic_aciduria	Intellectual_disability	Ataxia	Hyperammonemia	EEG_abnormality	Hyperglutaminemia	Oroticaciduria	Aminoaciduria	Short_stature	Hypoargininemia	Trichorrhexis_nodosa	Abnormal_hair_quantity
Carbamoyl-phosphate_synthetase_1_deficiency	Seizures	Muscular_hypotonia	Episodic_ammonia_intoxication	Hyperammonemia	Respiratory_insufficiency	Aminoaciduria	Hypoargininemia
Corpus_callosum_agenesis-neuronopathy_syndrome	Microcephaly	Turricephaly	Strabismus	Myopia	Nystagmus	Intellectual_disability	Seizures	Global_developmental_delay	Agenesis_of_corpus_callosum	Craniosynostosis	EEG_abnormality	Aqueductal_stenosis	Hemiplegia/hemiparesis	Abnormality_of_retinal_pigmentation
Craniosynostosis-Dandy-Walker_malformation-hydrocephalus_syndrome	Hydrocephalus	Dolichocephaly	Hypertelorism	Micrognathia	Strabismus	Optic_atrophy	Intellectual_disability	Dandy-Walker_malformation	Cerebellar_hypoplasia	Frontal_bossing	Orbital_craniosynostosis
Cutis_marmorata_telangiectatica_congenita	Multicystic_kidney_dysplasia	Oral_cleft	Micrognathia	Retinal_detachment	Leukocoria	Hypothyroidism	Abnormality_of_the_skin	Cutis_marmorata	Purpura	Seizures	Intrauterine_growth_retardation	Ascites	Patent_ductus_arteriosus	Toe_syndactyly	Subcutaneous_hemorrhage	Scoliosis	Abnormality_of_the_lower_limb	Abnormality_of_the_upper_limb	Reduced_bone_mineral_density	Capillary_hemangioma	Finger_syndactyly	Short_lower_limbs	Multiple_cafe-au-lait_spots	Aplasia/Hypoplasia_of_the_skin	Arteriovenous_malformation	Cognitive_impairment	Arterial_stenosis	Asymmetric_growth	Telangiectasia_of_the_skin	Displacement_of_the_urethral_meatus	Blue_nevus	Skin_erosion
Autosomal_dominant_coarctation_of_aorta	Ventricular_septal_defect	Patent_ductus_arteriosus	Hypoplastic_left_heart	Dilatation_of_the_aortic_arch	Abnormal_aortic_arch_morphology
Cohen_syndrome	Cryptorchidism	Abnormality_of_the_dentition	Open_mouth	Gingival_overgrowth	Microcephaly	Low_anterior_hairline	Short_philtrum	Hypoplasia_of_the_maxilla	Micrognathia	Preauricular_skin_tag	Sensorineural_hearing_impairment	Prominent_nasal_bridge	Strabismus	Abnormal_eyelid_morphology	Downslanted_palpebral_fissures	Abnormal_eyelash_morphology	Long_eyelashes	Myopia	Microphthalmia	Thick_eyebrow	Iris_coloboma	Nystagmus	Optic_atrophy	Pectus_excavatum	Delayed_puberty	Abnormality_of_skin_pigmentation	Chorioretinal_dystrophy	Arachnodactyly	Tapered_finger	Intellectual_disability	Seizures	Muscular_hypotonia	Global_developmental_delay	Intrauterine_growth_retardation	Obesity	Failure_to_thrive_in_infancy	Decreased_fetal_movement	Macrodontia	Weak_cry	Ventricular_septal_defect	Mitral_valve_prolapse	Sandal_gap	Neutropenia	Neurological_speech_impairment	Scoliosis	High_narrow_palate	Kyphosis	Genu_valgum	Cubitus_valgus
Cooper-Jabs_syndrome	Brachycephaly	Malar_flattening	Low-set_posteriorly_rotated_ears	Abnormality_of_the_middle_ear	Conductive_hearing_impairment	Atresia_of_the_external_auditory_canal	Anteverted_nares	Strabismus	Abnormality_of_the_ribs	Congenital_diaphragmatic_hernia	Missing_ribs	Intellectual_disability	Muscular_hypotonia	Umbilical_hernia	Anteriorly_placed_anus	Ventricular_septal_defect	Frontal_bossing	Respiratory_insufficiency	Scoliosis	Abnormality_of_the_hip_bone	Short_stature	Reduced_bone_mineral_density	Joint_hyperflexibility	Abnormal_dermatoglyphics	Proximal_placement_of_thumb	Camptodactyly_of_finger
Congenital_cataract-hypertrophic_cardiomyopathy-mitochondrial_myopathy_syndrome	Strabismus	Glaucoma	Abnormal_electroretinogram	Cataract	Myopia	Nystagmus	Corneal_dystrophy	Hypertrophic_cardiomyopathy	Lactic_acidosis	Myopathy
Charlie_M_syndrome	Narrow_mouth	Thin_vermilion_border	Hypertelorism	Short_philtrum	Micrognathia	Macrotia	Wide_nasal_bridge	Brachydactyly	Abnormality_of_the_metacarpal_bones	Split_hand	Triphalangeal_thumb	Abnormal_fingernail_morphology	Finger_syndactyly	Abnormal_toenail_morphology	Reduced_number_of_teeth	Non-midline_cleft_lip
Cholestasis-lymphedema_syndrome	Jaundice	Abnormality_of_skin_pigmentation	Lymphedema	Multiple_lipomas	Biliary_tract_abnormality	Cirrhosis	Portal_hypertension	Splenomegaly	Nausea_and_vomiting	Abdominal_pain	Gastrointestinal_hemorrhage	Hepatomegaly	Bone_pain	Hyperlipidemia	Abnormality_of_urine_homeostasis	Reduced_bone_mineral_density	Neonatal_cholestatic_liver_disease	Acholic_stools	Fatigue	Abnormality_of_the_lymphatic_system
Cleidocranial_dysplasia	Glossoptosis	Abnormality_of_the_dentition	Cleft_palate	Large_fontanelles	Sinusitis	Brachycephaly	Macrocephaly	Mandibular_prognathia	Hypertelorism	Broad_forehead	Sloping_forehead	Micrognathia	Hearing_abnormality	Hearing_impairment	Chronic_otitis_media	Carious_teeth	Abnormality_of_dental_eNAME	Delayed_eruption_of_teeth	Abnormality_of_the_ribs	Narrow_chest	Hypoplastic_scapulae	Short_clavicles	Osteoporosis	Brachydactyly	Abnormality_of_the_metacarpal_bones	Abnormal_thumb_morphology	Tapered_finger	Dystrophic_toenail	Frontal_bossing	Recurrent_respiratory_infections	Abnormality_of_pelvic_girdle_bone_morphology	Wormian_bones	Scoliosis	Skeletal_dysplasia	High_narrow_palate	Recurrent_fractures	Coxa_vara	Genu_valgum	Spina_bifida_occulta	Clinodactyly_of_the_5th_finger	Short_stature	Decreased_skull_ossification	Abnormal_sacrum_morphology	Depressed_nasal_bridge	Abnormality_of_epiphysis_morphology	Dystrophic_fingernails	Hypoplastic_inferior_ilia	Sleep_apnea	Hypoplasia_of_the_zygomatic_bone
Fetal_alcohol_syndrome	Cleft_palate	Thin_upper_lip_vermilion	Microcephaly	Narrow_face	Epicanthus	Smooth_philtrum	Micrognathia	Low-set_posteriorly_rotated_ears	Anteverted_nares	Strabismus	Telecanthus	Ptosis	Microphthalmia	Microdontia	Behavioral_abnormality	Congenital_diaphragmatic_hernia	Intellectual_disability	Global_developmental_delay	Specific_learning_disability	Joint_stiffness	Intrauterine_growth_retardation	Atrial_septal_defect	Generalized_hirsutism	Short_nose	Vertebral_segmentation_defect	Short_stature	Biparietal_narrowing	Abnormal_dermatoglyphics	Abnormality_of_immune_system_physiology	Non-midline_cleft_lip	Cognitive_impairment	Visceral_angiomatosis
Isolated_ectopia_lentis	Malar_flattening	Mandibular_prognathia	Visual_impairment	Cataract	Nystagmus	Amblyopia	Hypertension	Ectopia_lentis	Joint_stiffness	Ectopia_pupillae	Cognitive_impairment
Ebstein_malformation_of_the_tricuspid_valve	Premature_birth	Atrial_septal_defect	Congestive_heart_failure	Patent_ductus_arteriosus	Sudden_cardiac_death	Abnormal_cardiac_septum_morphology	Respiratory_insufficiency	Malformation_of_the_heart_and_great_vessels	Cerebral_ischemia	Abnormality_of_the_endocardium	Arterial_thrombosis	Atrial_fibrillation	Ebstein_anomaly_of_the_tricuspid_valve	Imperforate_tricuspid_valve	Arrhythmia	Right_bundle_branch_block	Fatigue	Chest_pain
Postaxial_acrofacial_dysostosis	Cleft_palate	Malar_flattening	Micrognathia	Low-set_posteriorly_rotated_ears	Abnormality_of_the_middle_ear	Cupped_ear	Conductive_hearing_impairment	Strabismus	Downslanted_palpebral_fissures	Eyelid_coloboma	Supernumerary_nipple	Malformation_of_the_heart_and_great_vessels	Hypoplasia_of_the_radius	Hypoplasia_of_the_ulna	Finger_syndactyly	Abnormal_dermatoglyphics	Ectropion_of_lower_eyelids	Microtia	Non-midline_cleft_lip	Camptodactyly_of_finger
Dyskeratosis_congenita	Abnormal_morphology_of_female_internal_genitalia	Abnormal_testis_morphology	Abnormality_of_the_dentition	Hypoplasia_of_the_maxilla	Hearing_impairment	Blepharitis	Abnormal_eyelash_morphology	Cataract	Abnormal_eyebrow_morphology	Abnormality_of_the_pharynx	Hypodontia	Carious_teeth	Taurodontia	Periodontitis	Diabetes_mellitus	Osteoporosis	Hyperhidrosis	Palmoplantar_keratoderma	Hypermelanotic_macule	Hypopigmented_skin_patches	Abnormal_fingernail_morphology	Global_developmental_delay	Cirrhosis	Hepatic_failure	Intrauterine_growth_retardation	Alopecia	Splenomegaly	Thrombocytopenia	Abnormality_of_neutrophils	Anemia	Abnormality_of_coagulation	Malabsorption	Recurrent_respiratory_infections	Premature_graying_of_hair	Hepatomegaly	Cerebral_calcification	Tracheoesophageal_fistula	Scoliosis	Neoplasm	Lymphoma	Oral_leukoplakia	Recurrent_fractures	Neoplasm_of_the_pancreas	Short_stature	Cellular_immunodeficiency	Bone_marrow_hypocellularity	Aplasia/Hypoplasia_of_the_skin	Abnormal_blistering_of_the_skin	Sparse_hair
XY_type_gonadal_dysgenesis-associated_anomalies_syndrome	Abnormality_of_the_ureter	Gonadal_dysgenesis	Polycystic_ovaries	Cleft_palate	Epicanthus	Abnormality_of_the_philtrum	Low-set_posteriorly_rotated_ears	Atresia_of_the_external_auditory_canal	Downslanted_palpebral_fissures	Brachydactyly	Large_hands	Intellectual_disability_mild	Umbilical_hernia	Ventricular_septal_defect	Short_columella	Delayed_skeletal_maturation	Short_stature	Biparietal_narrowing	Preauricular_pit	Bilateral_single_transverse_palmar_creases	Microtia	Renal_hypoplasia/aplasia	Abnormal_hair_pattern	Broad_thumb	Mild_global_developmental_delay	Non-midline_cleft_lip
Familial_dysautonomia	Abnormality_of_the_kidney	Renal_insufficiency	Alacrima	Myopia	Abnormal_pupil_morphology	Optic_atrophy	Behavioral_abnormality	Hypertension	Hypohidrosis	Hyperhidrosis	Acrocyanosis	Heterochromia_iridis	Seizures	Ataxia	Muscular_hypotonia	Hyporeflexia	Orthostatic_hypotension	Gait_disturbance	Growth_delay	Tachycardia	Gastroesophageal_reflux	Malignant_hyperthermia	Abnormality_of_the_pleura	Recurrent_respiratory_infections	Abnormality_of_the_peritoneum	Scoliosis	Recurrent_fractures	Osteolysis	Hyponatremia	EMG_abnormality	Impaired_pain_sensation	Corneal_opacity	Feeding_difficulties_in_infancy	Peripheral_neuropathy	Avascular_necrosis	Glomerulopathy	Corneal_erosion
Dubowitz_syndrome	Cryptorchidism	Hypospadias	Abnormality_of_female_external_genitalia	Hydronephrosis	Wide_mouth	Abnormality_of_the_dentition	Submucous_cleft_hard_palate	High_palate	Hydrocephalus	Microcephaly	Wide_anterior_fontanel	Delayed_cranial_suture_closure	Narrow_face	Epicanthus	Low_anterior_hairline	Hypertelorism	Sloping_forehead	Micrognathia	Hearing_impairment	Low-set_posteriorly_rotated_ears	Protruding_ear	Strabismus	Telecanthus	Ptosis	Cataract	Myopia	Blepharophimosis	Nystagmus	Delayed_eruption_of_teeth	Pectus_excavatum	Hypoparathyroidism	Dry_skin	Sacral_dimple	Eczema	Cutis_marmorata	Cutaneous_photosensitivity	Abnormality_of_skin_pigmentation	Brachydactyly	Abnormal_fingernail_morphology	Intellectual_disability	Seizures	Craniosynostosis	Intrauterine_growth_retardation	Toe_syndactyly	Short_foot	Hypoplastic_toenails	Metatarsus_adductus	Sandal_gap	Thrombocytopenia
Diencephalic_syndrome	Long_penis	Everted_lower_lip_vermilion	Hydrocephalus	Macrotia	Nystagmus	Optic_atrophy	Behavioral_abnormality	Abnormality_of_the_hypothalamus-pituitary_axis	Hyperhidrosis	Large_hands	Decreased_body_weight	Cachexia	Neoplasm_of_the_nervous_system	Abnormality_of_movement
Encephalopathy_due_to_sulfite_oxidase_deficiency	Microcephaly	Full_cheeks	Long_philtrum	Deeply_set_eye	Myopia	Ectopia_lentis	Seizures	Ataxia	Spasticity	Spastic_tetraparesis	Nausea_and_vomiting	Developmental_regression	Abnormal_pattern_of_respiration	Short_nose	Aminoaciduria	Hemiplegia/hemiparesis	Feeding_difficulties_in_infancy	Intellectual_disability_severe	Prominent_forehead	Thick_vermilion_border	Abnormality_of_movement
Pyruvate_dehydrogenase_deficiency	High_palate	Trigonocephaly	Microcephaly	Narrow_face	Epicanthus	Hypertelorism	Long_philtrum	Wide_nasal_bridge	Abnormality_of_eye_movement	Upslanted_palpebral_fissure	Pectus_excavatum	Multiple_lipomas	Seizures	Ataxia	Muscular_hypotonia	Lethargy	Spasticity	Dysarthria	Global_developmental_delay	Choreoathetosis	Gait_disturbance	Dystonia	Tremor	Growth_delay	Intrauterine_growth_retardation	Abnormal_facial_shape	Frontal_bossing	Dyspnea	Ventriculomegaly	Tachypnea	Abnormal_pyramidal_sign	Aplasia/Hypoplasia_of_the_corpus_callosum	Feeding_difficulties_in_infancy	Cerebral_palsy	Osteolytic_defects_of_the_middle_phalanx_of_the_4th_toe
Isolated_glycerol_kinase_deficiency	Cryptorchidism	Osteoporosis	Intellectual_disability	Seizures	Muscular_hypotonia	Global_developmental_delay	Reduced_tendon_reflexes	Metabolic_acidosis	Neurological_speech_impairment	EEG_abnormality	Scoliosis	Myopathy	Elevated_serum_creatine_kinase	Hyperlordosis	EMG_abnormality	Short_stature	Adrenocortical_hypoplasia
Multiple_carboxylase_deficiency	Abnormality_of_the_nervous_system	Hyperammonemia	Organic_aciduria	Metabolic_ketoacidosis	Abnormal_enzyme/coenzyme_activity	Skin_rash	Seizures	Muscular_hypotonia	Feeding_difficulties	Psychomotor_retardation	Decreased_biotinidase_activity	Hearing_impairment	Abnormality_of_the_eye	Visual_impairment	Ataxia	Lethargy	Coma	Alopecia	Respiratory_distress	Abnormality_of_the_immune_system	Tachypnea	Limb_muscle_weakness
Neonatal_severe_primary_hyperparathyroidism	Narrow_chest	Abnormality_of_the_metaphysis	Hepatomegaly	Recurrent_fractures	Abnormality_of_calcium-phosphate_metabolism	Abnormality_of_the_thyroid_gland	Muscular_hypotonia	Splenomegaly	Aminoaciduria	Short_stature
Hypogonadism-mitral_valve_prolapse-intellectual_disability_syndrome	Decreased_fertility	Downslanted_palpebral_fissures	Intellectual_disability_mild	Obesity	Short_stature	Abnormal_hair_quantity	Abnormal_testis_morphology	Hypogonadism	High_palate	Short_neck	Gynecomastia	Abnormality_of_the_metacarpal_bones	Mitral_valve_prolapse	Low_posterior_hairline	Abnormality_of_the_ulna
Congenital_diaphragmatic_hernia	Congenital_diaphragmatic_hernia	Prominent_sternum	Pulmonary_hypoplasia	Respiratory_distress	Intestinal_malrotation	Aplasia/Hypoplasia_of_the_diaphragm	Hypoxemia	Abnormality_of_cardiovascular_system_morphology
Congenital_hydrocephalus	Hydrocephalus	Macrocephaly	Facial_asymmetry	Posteriorly_rotated_ears	Bulbous_nose	Strabismus	Downslanted_palpebral_fissures	Iris_coloboma	Intellectual_disability	Seizures	Motor_delay	Frontal_bossing	Ventriculomegaly	Small_cerebral_cortex	Abnormal_cortical_gyration	Colpocephaly
Neonatal_hemochromatosis	Micrognathia	Prominent_nose	Anteverted_nares	Blepharophimosis	Hypoglycemia	Congenital_hepatic_fibrosis	Increased_serum_ferritin	Increased_serum_iron	Prolonged_neonatal_jaundice	Aplasia/Hypoplasia_of_the_nipples	Abnormal_localization_of_kidney
Hennekam-Beemer_syndrome	Thick_lower_lip_vermilion	High_palate	Triangular_face	Optic_atrophy	Pruritus	Abnormality_of_skin_pigmentation	Intellectual_disability	Muscular_hypotonia	Areflexia	Failure_to_thrive	Pneumonia	Respiratory_insufficiency	Ventriculomegaly	Hypotension	Scoliosis	Short_stature	Microtia	Severe_global_developmental_delay	Fatigue	Lower_limb_asymmetry	Papule	Microcephaly	Delayed_cranial_suture_closure	Prominent_supraorbital_ridges	Micrognathia	Hearing_impairment	Conductive_hearing_impairment	Wide_nasal_bridge	Wide_nose	Proptosis	Upslanted_palpebral_fissure	Irritability	Abnormality_of_the_skeletal_system	Urticaria	Thickened_skin	Seizures	Subcutaneous_nodule	Vomiting	Abdominal_pain	Long_nose	Clinodactyly_of_the_5th_finger	Irregular_hyperpigmentation	Generalized_hyperpigmentation	Erythema	Arrhythmia	Macule	Immunologic_hypersensitivity	Camptodactyly_of_finger	Mastocytosis
Hartnup_disease	Glossitis	Gingivitis	Abnormality_of_the_eye	Strabismus	Abnormality_of_vision	Photophobia	Nystagmus	Emotional_lability	Hallucinations	Anxiety	Skin_rash	Cutaneous_photosensitivity	Hypopigmented_skin_patches	Intellectual_disability	Seizures	Ataxia	Muscular_hypotonia	Global_developmental_delay	Hyperreflexia	Malabsorption	Migraine	EEG_abnormality	Encephalitis	Short_stature	Irregular_hyperpigmentation	Abnormal_blistering_of_the_skin	Neutral_hyperaminoaciduria	Abnormal_urinary_color
Hawkinsinuria	Hypothyroidism	Muscular_hypotonia	Failure_to_thrive	Metabolic_acidosis	Fine_hair	4-Hydroxyphenylpyruvic_aciduria	4-Hydroxyphenylacetic_aciduria	Sparse_hair	Abnormality_of_tyrosine_metabolism
Galactosialidosis	Coarse_facial_features	Hearing_impairment	Abnormality_of_the_vertebral_column	Intellectual_disability	Seizures	Skeletal_dysplasia	Abnormal_vertebral_morphology	Corneal_opacity	Cherry_red_spot_of_the_macula
Congenital_fiber-type_disproportion_myopathy	Muscular_hypotonia	Progressive_muscle_weakness	Type_1_muscle_fiber_atrophy	High_palate	Dental_crowding	Motor_delay	Areflexia	Reduced_tendon_reflexes	Flexion_contracture	Failure_to_thrive	Weight_loss	Dysphagia	Myopathic_facies	Abnormality_of_the_respiratory_system	Poor_head_control	Respiratory_insufficiency_due_to_muscle_weakness	Easy_fatigability	Weakness_of_muscles_of_respiration	Poor_appetite	Abnormality_of_skeletal_morphology	Feeding_difficulties	Fatigue	Fatigable_weakness_of_bulbar_muscles	Weakness_of_facial_musculature	Long_face	Micrognathia	Ophthalmoplegia	Pectus_excavatum	Congenital_hip_dislocation	Decreased_fetal_movement	Polyhydramnios	Hoarse_voice	Abnormal_heart_morphology	Cor_pulmonale	Pes_cavus	Talipes_equinovarus	Recurrent_respiratory_infections	Headache	Sleep_disturbance	Scoliosis	Kyphoscoliosis	Respiratory_failure	Elbow_flexion_contracture	Hip_contracture	Hyperlordosis	Generalized_muscle_weakness	Shoulder_girdle_muscle_weakness	Pelvic_girdle_muscle_weakness	Intercostal_muscle_weakness
Freeman-Sheldon_syndrome	Cryptorchidism	Narrow_mouth	Abnormality_of_the_dentition	Hypertelorism	Long_philtrum	Hearing_impairment	Underdeveloped_nasal_alae	Wide_nasal_bridge	Depressed_nasal_ridge	Strabismus	Deeply_set_eye	Downslanted_palpebral_fissures	Ptosis	Joint_stiffness	Failure_to_thrive	Growth_delay	Prenatal_movement_abnormality	Polyhydramnios	Oligohydramnios	Nasal_speech	Talipes_equinovarus	Malignant_hyperthermia	Neurological_speech_impairment	Scoliosis	Short_stature	Feeding_difficulties_in_infancy	Ulnar_deviation_of_finger	Absent_palmar_crease	Chin_dimple	Camptodactyly_of_finger	Hernia
Mitochondrial_DNA_depletion_syndrome_encephalomyopathic_form_with_methylmalonic_aciduria	Microcephaly	Sensorineural_hearing_impairment	Visual_impairment	Ptosis	Abnormal_electroretinogram	Abnormality_of_visual_evoked_potentials	Behavioral_abnormality	Decreased_nerve_conduction_velocity	Seizures	Ataxia	Global_developmental_delay	Hyporeflexia	Ventriculomegaly	Delayed_gross_motor_development	Generalized_hirsutism	Cerebral_calcification	Skeletal_muscle_atrophy	Elevated_serum_creatine_kinase	Aminoaciduria	Short_stature	Cachexia	Intellectual_disability_progressive	Methylmalonic_aciduria
Fetal_parvovirus_syndrome	Abnormality_of_the_eye	Abnormality_of_vision	Intrauterine_growth_retardation	Ascites	Hypertrophic_cardiomyopathy	Hydrops_fetalis	Thrombocytopenia	Anemia	Increased_nuchal_translucency
Frontal_encephalocele	Hydrocephalus	Macrocephaly	Dolichocephaly	Hypertelorism	Seizures	Skull_defect	Encephalocele	Spina_bifida	Leukodystrophy	Cerebral_calcification	Aplasia/Hypoplasia_of_the_corpus_callosum
Congenital_pulmonary_airway_malformation	Polyhydramnios	Premature_birth	Abnormality_of_the_respiratory_system	Respiratory_insufficiency	Abnormality_of_the_pleura
Congenital_macroglossia	Macroglossia
Muir-Torre_syndrome	Neoplasm_of_the_liver	Breast_carcinoma	Colon_cancer	Hematological_neoplasm	Neoplasm_of_the_stomach	Malignant_genitourinary_tract_tumor	Neoplasm_of_the_skin	Adenoma_sebaceum	Renal_neoplasm	Endometrial_carcinoma	Laryngeal_carcinoma	Salivary_gland_neoplasm
Moebius_syndrome	Hypogonadotrophic_hypogonadism	Cleft_palate	Open_mouth	High_palate	Everted_lower_lip_vermilion	Epicanthus	Mask-like_facies	Micrognathia	Hearing_impairment	Strabismus	Blepharitis	Visual_impairment	Ptosis	Ophthalmoplegia	Microdontia	Autism	Brachydactyly	Muscular_hypotonia	Motor_delay	Death_in_infancy	Abnormality_of_the_voice	Talipes_equinovarus	Dysphagia	Arthrogryposis_multiplex_congenita	Abnormality_of_the_ulna	Skeletal_muscle_atrophy	Absent_hand	Clinodactyly_of_the_5th_finger	Abnormality_of_the_sense_of_smell	Aplasia/Hypoplasia_involving_the_metacarpal_bones	Finger_syndactyly	Aplasia/Hypoplasia_of_the_radius	Cranial_nerve_paralysis	Multiple_cafe-au-lait_spots	Corneal_opacity	Feeding_difficulties_in_infancy	Aplasia/Hypoplasia_of_the_thumb	Aplasia_of_the_pectoralis_major_muscle	Reduced_number_of_teeth	Aplasia/Hypoplasia_of_the_tongue	Facial_palsy	Breast_aplasia
MASA_syndrome	Delayed_speech_and_language_development	Intellectual_disability	Hand_clenching	Spastic_paraplegia	Agenesis_of_corpus_callosum	Gait_disturbance	Hyperreflexia	Ventriculomegaly	Aphasia	Clinodactyly_of_the_5th_finger	Short_stature	Hemiplegia/hemiparesis	Camptodactyly_of_finger
Marshall_syndrome	Abnormality_of_the_dentition	Cleft_palate	Thick_upper_lip_vermilion	Brachycephaly	Malar_flattening	Hypoplasia_of_the_maxilla	Long_philtrum	Micrognathia	Sensorineural_hearing_impairment	Wide_nasal_bridge	Anteverted_nares	Glaucoma	Cataract	Sparse_eyebrow	Retinal_detachment	Myopia	Amblyopia	Vitreoretinal_degeneration	Frontal_bossing	Thickened_calvaria	Osteoarthritis	Arthralgia	Short_stature	Abnormal_vitreous_humor_morphology	Depressed_nasal_bridge	Hypoplasia_of_the_zygomatic_bone	Flat_face	Thick_lower_lip_vermilion	High_palate	Hypertelorism	Strabismus	Visual_impairment	Proptosis	Nystagmus	Sparse_eyelashes	Hypohidrosis	Hypotrichosis	Ectopia_lentis	Cerebral_calcification	Hypoplastic_frontal_sinuses	Genu_valgum	Short_nose
Neuroblastoma	Neoplasm_of_the_nervous_system	Elevated_urinary_catecholamines
Thanatophoric_dysplasia	Abnormality_of_the_kidney	Hydrocephalus	Macrocephaly	Hearing_impairment	Low-set_ears	Downslanted_palpebral_fissures	Proptosis	Narrow_chest	Platyspondyly	Abnormality_of_the_metaphysis	Acanthosis_nigricans	Brachydactyly	Seizures	Muscular_hypotonia	Hip_dysplasia	Joint_stiffness	Intrauterine_growth_retardation	Polyhydramnios	Redundant_skin	Atrial_septal_defect	Patent_ductus_arteriosus	Frontal_bossing	Pulmonary_hypoplasia	Respiratory_insufficiency	Ventriculomegaly	Intellectual_disability_profound	Gray_matter_heterotopia	Malformation_of_the_heart_and_great_vessels	Skeletal_dysplasia	Cloverleaf_skull	Kyphosis	Abnormality_of_the_ilium	Micromelia	Depressed_nasal_bridge	Joint_hyperflexibility	Disproportionate_short-limb_short_stature	Short_thorax	Increased_nuchal_translucency	Midface_retrusion	Flat_face	Abnormality_of_the_sacroiliac_joint
Metatropic_dysplasia	Cleft_palate	Hydrocephalus	High_forehead	Low-set_posteriorly_rotated_ears	Cataract	Abnormality_of_the_ribs	Narrow_chest	Abnormality_of_the_metaphysis	Joint_stiffness	Scoliosis	Skeletal_dysplasia	Kyphosis	Halberd-shaped_pelvis	Micromelia	Abnormal_cortical_bone_morphology	Abnormal_form_of_the_vertebral_bodies	Abnormal_enchondral_ossification	Severe_short_stature	Clinodactyly_of_the_5th_finger	Abnormality_of_the_intervertebral_disk	Depressed_nasal_bridge	Aplasia/Hypoplasia_of_the_lungs	Hypoplastic_cervical_vertebrae	Camptodactyly_of_finger	Rough_bone_trabeculation	Long_thorax
Proximal_myotonic_myopathy	Cataract	Myotonia
Opsismodysplasia	Large_fontanelles	Macrocephaly	Blue_sclerae	Pectus_excavatum	Narrow_chest	Abnormality_of_the_metaphysis	Brachydactyly	Tapered_finger	Muscular_hypotonia	Joint_stiffness	Splenomegaly	Frontal_bossing	Respiratory_insufficiency	Recurrent_respiratory_infections	Hepatomegaly	Delayed_skeletal_maturation	Hypoplastic_pubic_bone	Hypoplastic_ischia	Squared_iliac_bones	Short_nose	Severe_short_stature	Depressed_nasal_bridge	Flat_occiput	Abnormality_of_epiphysis_morphology	Hypoplastic_vertebral_bodies	Broad_thumb	Abnormally_ossified_vertebrae
Horizontal_gaze_palsy_with_progressive_scoliosis	Sensorineural_hearing_impairment	Short_neck	Nystagmus	Seizures	Scoliosis	Kyphosis	Horizontal_supranuclear_gaze_palsy	Cognitive_impairment
Omphalocele	Omphalocele	Premature_birth
Linear_nevus_sebaceus_syndrome	Prominent_occiput	Facial_asymmetry	Abnormality_of_the_eye	Abnormality_of_vision	Telecanthus	Microphthalmia	Iris_coloboma	Melanocytic_nevus	Cavernous_hemangioma	Intellectual_disability	Seizures	Muscular_hypotonia	Dandy-Walker_malformation	Reduced_tendon_reflexes	Hyperreflexia	Plagiocephaly	Growth_delay	Alopecia	Frontal_bossing	Ventriculomegaly	Porencephaly	EEG_abnormality	Cerebral_calcification	Genu_recurvatum	Vertebral_segmentation_defect	Biparietal_narrowing	Aplasia/Hypoplasia_of_the_cerebellum	Aplasia/Hypoplasia_of_the_corpus_callosum	Irregular_hyperpigmentation	Adenoma_sebaceum	Asymmetric_growth
Multiple_intestinal_atresia	Polyhydramnios	Duodenal_stenosis	Gastrointestinal_atresia
Congenital_short_bowel_syndrome	Short_stature	Intestinal_hypoplasia	Cognitive_impairment	Lipoatrophy	Displacement_of_the_urethral_meatus	Hypotrichosis	Intestinal_malrotation
Hypoplastic_left_heart_syndrome	Patent_ductus_arteriosus	Mitral_stenosis	Maternal_diabetes	Hypoplastic_aortic_arch	Atrial_septal_defect	Abnormality_of_chromosome_segregation	Hypoplastic_left_heart	Mitral_atresia
Foveal_hypoplasia-presenile_cataract_syndrome	Abnormality_of_the_eye	Strabismus	Cataract	Nystagmus	Optic_atrophy	Abnormality_of_vision	Generalized_hyperpigmentation
Isolated_cloverleaf_skull_syndrome	Malar_flattening	High_forehead	Low-set_posteriorly_rotated_ears	Convex_nasal_ridge	Proptosis	Craniosynostosis	Limitation_of_joint_mobility	Skeletal_dysplasia	Abnormal_form_of_the_vertebral_bodies	Finger_syndactyly	Midface_retrusion	Cognitive_impairment
Jacobsen_syndrome	Multicystic_kidney_dysplasia	Inguinal_hernia	Cryptorchidism	Hydronephrosis	Abnormal_palate_morphology	Trigonocephaly	Macrocephaly	Epicanthus	Hypertelorism	Smooth_philtrum	Facial_asymmetry	Long_philtrum	High_forehead	Low-set_posteriorly_rotated_ears	Wide_nasal_bridge	Anteverted_nares	Webbed_neck	Short_neck	Microcornea	Strabismus	Downslanted_palpebral_fissures	Ptosis	Cataract	Iris_coloboma	Eyelid_coloboma	Ectropion	Missing_ribs	Eczema	Hand_polydactyly	Intellectual_disability	Seizures	Global_developmental_delay	Agenesis_of_corpus_callosum	Pachygyria	Growth_delay	Intrauterine_growth_retardation	Death_in_infancy	Premature_birth	Ventricular_septal_defect	Aortic_valve_stenosis	Coarctation_of_aorta	Annular_pancreas	Pes_planus	Toe_syndactyly	Short_toe	Long_hallux	Toe_clinodactyly	Thrombocytopenia	Talipes
Joubert_syndrome_with_oculorenal_defect	Renal_insufficiency	Nephropathy	Hydrocephalus	Long_face	Low-set_posteriorly_rotated_ears	Prominent_nasal_bridge	Anteverted_nares	Strabismus	Visual_impairment	Ptosis	Retinal_dystrophy	Chorioretinal_coloboma	Iris_coloboma	Blindness	Nystagmus	Behavioral_abnormality	Autistic_behavior	Abnormality_of_the_hypothalamus-pituitary_axis	Hand_polydactyly	Intellectual_disability	Seizures	Ataxia	Muscular_hypotonia	Global_developmental_delay	Cerebellar_vermis_hypoplasia	Foot_polydactyly	Encephalocele	Apnea	Aganglionic_megacolon	Abnormality_of_neuronal_migration	Molar_tooth_sign_on_MRI	Highly_arched_eyebrow	Malformation_of_the_heart_and_great_vessels	Scoliosis	Tachypnea	Biparietal_narrowing	Aplasia/Hypoplasia_of_the_corpus_callosum
Larsen-like_osseous_dysplasia-short_stature_syndrome	Narrow_mouth	Thin_vermilion_border	Low-set_posteriorly_rotated_ears	Strabismus	Proptosis	Abnormality_of_the_metaphysis	Brachydactyly	Abnormality_of_the_metacarpal_bones	Global_developmental_delay	Hip_dysplasia	Intrauterine_growth_retardation	Abnormal_cardiac_septum_morphology	Abnormality_of_pelvic_girdle_bone_morphology	Scoliosis	Skeletal_dysplasia	Short_nose	Abnormal_form_of_the_vertebral_bodies	Clinodactyly_of_the_5th_finger	Short_stature	Reduced_bone_mineral_density	Corneal_opacity
Congenital_laryngomalacia	Cleft_palate	Laryngomalacia	Abnormality_of_the_voice	Non-midline_cleft_lip
Angioosteohypertrophic_syndrome	Tall_stature	Abnormality_of_the_menstrual_cycle	Microcephaly	Macrocephaly	Facial_asymmetry	Glaucoma	Cataract	Hematuria	Cutis_marmorata	Melanocytic_nevus	Lymphedema	Multiple_lipomas	Cavernous_hemangioma	Hand_polydactyly	Hand_oligodactyly	Seizures	Hemihypertrophy	Abnormality_of_the_cardiovascular_system	Congestive_heart_failure	Tricuspid_valve_prolapse	Abnormality_of_coagulation	Pulmonary_embolism	Gastrointestinal_hemorrhage	Malformation_of_the_heart_and_great_vessels	Abnormality_of_the_vasculature	Scoliosis	Bone_pain	Abnormality_of_the_lower_limb	Macrodactyly	Venous_thrombosis	Venous_insufficiency	Finger_syndactyly	Hyperpigmented_nevi	Cognitive_impairment	Hemihypertrophy_of_lower_limb	Hemihypertrophy_of_upper_limb	Telangiectasia_of_the_skin	Cellulitis	Large_face	Visceral_angiomatosis	Peripheral_arteriovenous_fistula	Skin_ulcer
Trichorhinophalangeal_syndrome_type_2	Recurrent_urinary_tract_infections	Vesicoureteral_reflux	Abnormality_of_the_dentition	Abnormal_palate_morphology	Thin_upper_lip_vermilion	Microcephaly	Long_philtrum	Low-set_posteriorly_rotated_ears	Conductive_hearing_impairment	Protruding_ear	Bulbous_nose	Wide_nasal_bridge	Thick_eyebrow	Brachydactyly	Intellectual_disability	Muscular_hypotonia	Joint_dislocation	Hip_dysplasia	Growth_delay	Redundant_skin	Talipes	Deep_philtrum	Ventriculomegaly	Sparse_scalp_hair	Malformation_of_the_heart_and_great_vessels	Bone_pain	Delayed_skeletal_maturation	Genu_valgum	Short_stature	Multiple_long-bone_exostoses	Joint_hyperflexibility	Avascular_necrosis_of_the_capital_femoral_epiphysis	Bilateral_single_transverse_palmar_creases	Aplasia/Hypoplasia_of_the_mandible	Thick_nasal_alae	Cone-shaped_epiphyses_of_the_phalanges_of_the_hand	Increased_number_of_teeth	Exostoses
Congenital_pulmonary_lymphangiectasia	Cyanosis	Growth_delay	Ascites	Congestive_heart_failure	Pulmonic_stenosis	Splenomegaly	Hydrops_fetalis	Gastroesophageal_reflux	Pulmonary_arterial_hypertension	Respiratory_distress	Pleural_effusion	Hepatomegaly	Tricuspid_regurgitation	Chronic_obstructive_pulmonary_disease	Chylopericardium	Cough
Congenital_laryngeal_web	Laryngomalacia	Hoarse_voice	Abnormal_cardiac_septum_morphology	Respiratory_distress	Short_stature	Stridor
Laurence-Moon_syndrome	Cryptorchidism	Renal_insufficiency	Brachycephaly	Epicanthus	Low-set_posteriorly_rotated_ears	Sensorineural_hearing_impairment	Strabismus	Cataract	Iris_coloboma	Nystagmus	Brachydactyly	Hand_polydactyly	Intellectual_disability	Ataxia	Obesity	Malformation_of_the_heart_and_great_vessels	Congenital_hepatic_fibrosis	Short_stature	Type_II_diabetes_mellitus	Finger_syndactyly	Bilateral_single_transverse_palmar_creases	Hypoplasia_of_penis	Abnormality_of_the_antitragus	Displacement_of_the_urethral_meatus
Schizencephaly	Strabismus	Intellectual_disability	Seizures	Spasticity	Global_developmental_delay	Hemiparesis	Porencephaly	EEG_abnormality	Spastic_tetraplegia	Aplasia/Hypoplasia_of_the_corpus_callosum
Familial_Scheuermann_disease	Kyphosis	Abnormal_form_of_the_vertebral_bodies
Silver-Russell_syndrome	Triangular_face	Low-set_ears	Blue_sclerae	Intrauterine_growth_retardation	Short_stature	Cachexia	Relative_macrocephaly	Postnatal_growth_retardation	Prominent_forehead	Feeding_difficulties	Cryptorchidism	Abnormality_of_male_external_genitalia	Thin_vermilion_border	Delayed_cranial_suture_closure	Micrognathia	Low-set_posteriorly_rotated_ears	Dental_crowding	Insulin_resistance	Motor_delay	Failure_to_thrive_in_infancy	High_pitched_voice	Premature_birth	Recurrent_hypoglycemia	Constipation	Gastroesophageal_reflux	Sleep_disturbance	Downturned_corners_of_mouth	Delayed_skeletal_maturation	Arthralgia	Decreased_muscle_mass	Clinodactyly_of_the_5th_finger	Abnormality_of_the_calcaneus	Decreased_testicular_size	Shoulder_dimple	Abnormal_appendicular_skeleton_morphology	Premature_adrenarche	Asymmetric_growth	Lower_limb_asymmetry	Upper_limb_asymmetry	Hypospadias	Abnormality_of_the_urinary_system	Abnormality_of_the_vagina	Autistic_behavior	Precocious_puberty	Cafe-au-lait_spot	Hyperhidrosis	Intellectual_disability_mild	Obesity	Abnormality_of_the_cardiovascular_system
Multiple_sclerosis-ichthyosis-factor_VIII_deficiency_syndrome	Optic_atrophy	Diplopia	Sensory_neuropathy	Ataxia	Gait_disturbance	Abnormal_leukocyte_morphology	Abnormality_of_coagulation	Vertigo	Hemiplegia/hemiparesis	Abnormal_pyramidal_sign	Ichthyosis	Retrobulbar_optic_neuritis
Sj√∂gren-Larsson_syndrome	Microcephaly	Retinopathy	Myopia	Macular_degeneration	Photophobia	Abnormality_of_dental_eNAME	Dry_skin	Hyperkeratosis	Urticaria	Intellectual_disability	Seizures	Muscular_hypotonia	Spasticity	Dysarthria	Spastic_diplegia	Joint_stiffness	Neurological_speech_impairment	Scoliosis	Skeletal_dysplasia	Kyphosis	Short_stature	Abnormal_pyramidal_sign	Generalized_hyperpigmentation	Abnormality_of_retinal_pigmentation	Ichthyosis	Erythema	Inflammatory_abnormality_of_the_eye	Corneal_erosion
Sirenomelia	Ambiguous_genitalia	Abnormality_of_the_urinary_system	Anal_atresia	Renal_hypoplasia/aplasia	Absence_of_the_sacrum	Sirenomelia	Abnormality_of_the_cardiovascular_system	Spina_bifida	Tracheoesophageal_fistula	Aplasia/Hypoplasia_of_the_radius
Infantile_spasms-broad_thumbs_syndrome	Abnormality_of_the_fontanelles_or_cranial_sutures	Hypertelorism	Micrognathia	Convex_nasal_ridge	Optic_disc_pallor	Seizures	Cerebral_cortical_atrophy	Aplasia/Hypoplasia_of_the_corpus_callosum	Vaginal_hernia	Microcephaly	Downslanted_palpebral_fissures	Cataract	Hypertrophic_cardiomyopathy	EEG_abnormality	Broad_thumb
Sturge-Weber_syndrome	Seizures	Capillary_hemangioma	Strabismus	Glaucoma	Optic_atrophy	Behavioral_abnormality	Intellectual_disability	Stroke	Hyperreflexia	Attention_deficit_hyperactivity_disorder	Abnormality_of_the_cerebral_vasculature	Gingival_overgrowth	Hydrocephalus	Macrocephaly	Hearing_abnormality	Abnormality_of_the_eye	Abnormality_of_eye_movement	Abnormality_of_vision	Conjunctival_telangiectasia	Retinal_detachment	Abnormal_choroid_morphology	Iris_coloboma	Blindness	Autistic_behavior	Heterochromia_iridis	Corneal_dystrophy	Dysphagia	Cerebral_cortical_atrophy	Neurological_speech_impairment	Pulmonary_embolism	Arnold-Chiari_malformation	Cerebral_calcification	Venous_thrombosis	Abnormal_retinal_vascular_morphology	Hemianopia	Visceral_angiomatosis	Hyperostosis
Stormorken-Sjaastad-Langslet_syndrome	High_forehead	Deeply_set_eye	Miosis	Purpura	Asplenia	Abnormality_of_thrombocytes	Neurological_speech_impairment	Abnormality_of_the_musculature	Short_stature	Ichthyosis	Anemia	Abnormality_of_coagulation
Congenital_toxoplasmosis	Hydrocephalus	Microcephaly	Hearing_impairment	Visual_impairment	Microphthalmia	Nystagmus	Jaundice	Seizures	Muscular_hypotonia	Global_developmental_delay	Intrauterine_growth_retardation	Failure_to_thrive_in_infancy	Ascites	Premature_birth	Cardiomegaly	Thrombocytopenia	Anemia	Diarrhea	Ventriculomegaly	Hepatomegaly	Cerebral_calcification	Lymphadenopathy	Elevated_hepatic_transaminase	Abnormality_of_retinal_pigmentation	Macule	Cognitive_impairment
Thrombocytopenia-absent_radius_syndrome	Abnormality_of_the_kidney	Horseshoe_kidney	Abnormality_of_the_genitourinary_system	Aplasia_of_the_uterus	Cleft_palate	Broad_forehead	Micrognathia	High_forehead	Low-set_posteriorly_rotated_ears	Sensorineural_hearing_impairment	Cervical_ribs	Adducted_thumb	Tetralogy_of_Fallot	Abnormal_cardiac_septum_morphology	Thrombocytopenia	Abnormality_of_coagulation	Scoliosis	Coxa_valga	Hip_dislocation	Fused_cervical_vertebrae	Genu_varum	Fibular_aplasia	Patellar_dislocation	Absent_radius	Clinodactyly_of_the_5th_finger	Axial_malrotation_of_the_kidney	Finger_syndactyly	Aplasia/Hypoplasia_of_the_ulna	Aplasia/Hypoplasia_of_the_patella	Aplasia/hypoplasia_of_the_humerus	Nevus_flammeus_of_the_forehead	Phocomelia	Broad_thumb	Tibial_torsion
Tracheal_agenesis	Polyhydramnios	Abnormal_cardiac_septum_morphology	Respiratory_insufficiency	Aplasia/Hypoplasia_of_the_lungs	Tracheal_atresia
VACTERL/VATER_association	Multicystic_kidney_dysplasia	Abnormal_morphology_of_female_internal_genitalia	Cryptorchidism	Hypospadias	Bifid_scrotum	Ambiguous_genitalia	Ectopic_kidney	Renal_agenesis	Hydronephrosis	Cleft_palate	Large_fontanelles	Low-set_posteriorly_rotated_ears	Abnormality_of_the_ribs	Congenital_diaphragmatic_hernia	Abnormality_of_the_urethra	Cavernous_hemangioma	Preaxial_hand_polydactyly	Single_umbilical_artery	Intrauterine_growth_retardation	Omphalocele	Polyhydramnios	Laryngomalacia	Premature_birth	Abnormal_cardiac_septum_morphology	Abnormality_of_the_pancreas	Anal_atresia	Occipital_encephalocele	Anencephaly	Malformation_of_the_heart_and_great_vessels	Tracheoesophageal_fistula	Tracheal_stenosis	Vertebral_segmentation_defect	Abnormal_sacrum_morphology	Abnormality_of_the_intervertebral_disk	Abnormality_of_the_gallbladder	Finger_syndactyly	Aplasia/Hypoplasia_of_the_radius	Aplasia/Hypoplasia_of_the_lungs	Hypoplasia_of_penis	Anorectal_anomaly	Non-midline_cleft_lip
Congenital_varicella_syndrome	Microcephaly	Cataract	Microphthalmia	Atypical_scarring_of_skin	Intellectual_disability	Global_developmental_delay	Intrauterine_growth_retardation	Cerebral_cortical_atrophy	Micromelia
Juvenile_Paget_disease	Abnormality_of_the_dentition	Macrocephaly	Hearing_impairment	Optic_atrophy	Pectus_carinatum	Hypertension	Abnormality_of_the_clavicle	Osteoporosis	Melanocytic_nevus	Subcutaneous_nodule	Hyperuricemia	Recurrent_fractures	Short_stature	Cranial_hyperostosis	Bowing_of_the_long_bones	Abnormality_of_retinal_pigmentation	Rough_bone_trabeculation
Tetrasomy_12p	Thick_upper_lip_vermilion	Thin_upper_lip_vermilion	Everted_lower_lip_vermilion	Coarse_facial_features	Hypertelorism	Long_philtrum	Anteverted_nares	Short_neck	Strabismus	Telecanthus	Ptosis	Sparse_eyebrow	Upslanted_palpebral_fissure	Delayed_eruption_of_teeth	Hypohidrosis	Muscular_hypotonia	Reduced_tendon_reflexes	Frontal_bossing	Anal_atresia	Downturned_corners_of_mouth	Delayed_skeletal_maturation	Short_nose	Short_stature	Cachexia	Joint_hyperflexibility	Sparse_hair	Intellectual_disability_severe	Prominent_forehead	Abnormality_of_the_soft_palate
Pendred_syndrome	Abnormality_of_the_inner_ear	Sensorineural_hearing_impairment	Hypoplasia_of_the_cochlea	Enlarged_vestibular_aqueduct	Hypothyroidism	Goiter	Nephropathy	Hyperparathyroidism	Intellectual_disability	Ataxia	Respiratory_insufficiency	Neurological_speech_impairment	Vertigo	Tracheal_stenosis	Thyroid_carcinoma
Isolated_Pierre_Robin_syndrome	Glossoptosis	Cleft_palate	Micrognathia	Abnormality_of_the_pharynx	Neonatal_respiratory_distress	Upper_airway_obstruction
Neuralgic_amyotrophy	Narrow_mouth	Cleft_palate	Round_face	Sprengel_anomaly	Acrocyanosis	Polyneuropathy	Muscle_weakness	Respiratory_insufficiency	Neurological_speech_impairment	Arthralgia	Sleep_disturbance	Paresthesia	EMG_abnormality	Scapular_winging	Short_stature	Peripheral_neuropathy
Familial_spontaneous_pneumothorax	Abnormality_of_the_respiratory_system	Abnormality_of_the_pleura	Pneumothorax
Proteus_syndrome	Long_penis	Macrocephaly	Dolichocephaly	Long_face	Round_face	Facial_asymmetry	Proptosis	Chorioretinal_coloboma	Diabetes_insipidus	Melanocytic_nevus	Abnormality_of_skin_pigmentation	Thickened_skin	Abnormality_of_the_metacarpal_bones	Intellectual_disability	Seizures	Craniosynostosis	Subcutaneous_nodule	Splenomegaly	Generalized_hirsutism	Scoliosis	Skeletal_dysplasia	Neoplasm	Meningioma	Decreased_muscle_mass	Abnormal_form_of_the_vertebral_bodies	Myofibrillar_myopathy	Macrodactyly	Cachexia	Thrombophlebitis	Calvarial_hyperostosis	Capillary_hemangioma	Generalized_hyperkeratosis	Generalized_hyperpigmentation	Abnormality_of_retinal_pigmentation	Metatarsus_valgus	Thymus_hyperplasia	Vascular_skin_abnormality	Lipoma	Neoplasm_of_the_central_nervous_system	Arteriovenous_malformation	Neoplasm_of_the_thymus	Neoplasm_of_the_lung	Asymmetric_growth	Lower_limb_asymmetry	Upper_limb_asymmetry	Ovarian_neoplasm	Bronchogenic_cyst	Visceral_angiomatosis	Lymphangioma
Prune_belly_syndrome	Multicystic_kidney_dysplasia	Recurrent_urinary_tract_infections	Abnormality_of_the_bladder	Cryptorchidism	Abnormality_of_the_ureter	Hydroureter	Vesicoureteral_reflux	Renal_insufficiency	Abnormality_of_the_uterus	Decreased_fertility	Pectus_excavatum	Abnormality_of_the_ribs	Congenital_hip_dislocation	Failure_to_thrive	Oligohydramnios	Ventricular_septal_defect	Atrial_septal_defect	Tetralogy_of_Fallot	Patent_ductus_arteriosus	Talipes_equinovarus	Constipation	Anal_atresia	Recurrent_respiratory_infections	Intestinal_malrotation	Volvulus	Scoliosis	Vertebral_segmentation_defect	Aplasia_of_the_abdominal_wall_musculature	Aplasia/Hypoplasia_of_the_lungs	Decreased_testicular_size	Congenital_posterior_urethral_valve	Intestinal_atresia	Cognitive_impairment	Urogenital_sinus_anomaly
Peroxisomal_acyl-CoA_oxidase_deficiency	Epicanthus	Hypertelorism	Low-set_ears	Sensorineural_hearing_impairment	Strabismus	Abnormal_electroretinogram	Myopia	Nystagmus	Optic_atrophy	Abnormality_of_visual_evoked_potentials	Hypodontia	Hand_polydactyly	Seizures	Muscular_hypotonia	Global_developmental_delay	Hypertonia	Gait_disturbance	Hyperreflexia	Failure_to_thrive	Death_in_infancy	Abnormality_of_metabolism/homeostasis	Respiratory_insufficiency	Neurological_speech_impairment	Hepatomegaly	EEG_abnormality	Developmental_regression	Depressed_nasal_bridge	Intellectual_disability_severe	Abnormality_of_nervous_system_morphology
Disorder_of_sex_development-intellectual_disability_syndrome	Scrotal_hypoplasia	Hypogonadism	Thin_vermilion_border	Abnormality_of_the_face	Short_philtrum	Low-set_posteriorly_rotated_ears	Short_neck	Deeply_set_eye	Synophrys	Intellectual_disability	Low_posterior_hairline	Downturned_corners_of_mouth	Kyphosis	Genu_valgum	Short_nose	Spina_bifida_occulta	Reduced_bone_mineral_density	Wide_intermamillary_distance	Microtia	Severe_sensorineural_hearing_impairment	Hypoplasia_of_penis	Short_thorax	Abnormal_hair_pattern
Costello_syndrome	Cryptorchidism	Macroglossia	Abnormality_of_the_dentition	Thick_lower_lip_vermilion	Narrow_palate	Macrocephaly	Coarse_facial_features	Epicanthus	Full_cheeks	Low-set_posteriorly_rotated_ears	Short_neck	Thickened_nuchal_skin_fold	Strabismus	Keratoconus	Abnormality_of_dental_eNAME	Abnormality_of_the_skin	Acanthosis_nigricans	Hyperkeratosis	Abnormal_fingernail_morphology	Intellectual_disability	Failure_to_thrive_in_infancy	Polyhydramnios	Redundant_skin	Abnormality_of_the_hair	Concave_nail	Ventricular_septal_defect	Mitral_valve_prolapse	Hypertrophic_cardiomyopathy	Pulmonic_stenosis	Hypoplastic_toenails	Deep-set_nails	Gastroesophageal_reflux	Poor_suck	Cerebral_cortical_atrophy	Woolly_hair	Delayed_skeletal_maturation	Short_stature	Thickened_Achilles_tendon	Depressed_nasal_bridge	Joint_hyperflexibility	Generalized_hyperpigmentation	Abnormal_dermatoglyphics	Feeding_difficulties_in_infancy	Ulnar_deviation_of_finger	Large_earlobe	Papilloma	Lack_of_skin_elasticity	Large_face
Congenital_rubella_syndrome	Abnormality_of_the_fontanelles_or_cranial_sutures	Microcephaly	Sensorineural_hearing_impairment	Strabismus	Glaucoma	Visual_impairment	Cataract	Microphthalmia	Nystagmus	Abnormality_of_the_metaphysis	Jaundice	Skin_rash	Intellectual_disability	Seizures	Muscular_hypotonia	Spastic_diplegia	Intrauterine_growth_retardation	Ventricular_septal_defect	Atrial_septal_defect	Patent_ductus_arteriosus	Splenomegaly	Thrombocytopenia	Anemia	Neurological_speech_impairment	Hepatomegaly	Short_stature	Abnormality_of_the_pulmonary_artery	Abnormality_of_retinal_pigmentation	Corneal_opacity	Aplasia/Hypoplasia_of_the_iris	Type_I_diabetes_mellitus
Free_sialic_acid_storage_disease	Proteinuria	Nephrotic_syndrome	Nystagmus	Oculomotor_apraxia	Abnormality_of_skin_pigmentation	Intellectual_disability	Seizures	Ataxia	Muscular_hypotonia	Spasticity	Dysarthria	Global_developmental_delay	Gait_disturbance	Failure_to_thrive_in_infancy	Ascites	Splenomegaly	Abnormality_of_the_foot	Hydrops_fetalis	Abnormal_facial_shape	Neurological_speech_impairment	Recurrent_respiratory_infections	Hepatomegaly	Athetosis	Skeletal_dysplasia	Abnormality_of_the_upper_limb	Reduced_bone_mineral_density	Abnormal_pyramidal_sign	Iris_hypopigmentation	Aplasia/Hypoplasia_of_the_abdominal_wall_musculature	Skin_ulcer
Osteogenesis_imperfecta	Inguinal_hernia	Abnormality_of_the_dentition	Large_fontanelles	Brachycephaly	Macrocephaly	Prominent_occiput	Triangular_face	Micrognathia	Hearing_impairment	Convex_nasal_ridge	Glaucoma	Visual_impairment	Blue_sclerae	Carious_teeth	Abnormality_of_dental_eNAME	Dentinogenesis_imperfecta	Pectus_excavatum	Pectus_carinatum	Abnormality_of_the_ribs	Narrow_chest	Thin_ribs	Osteopenia	Osteoporosis	Abnormality_of_the_metaphysis	Hyperhidrosis	Gait_disturbance	Intrauterine_growth_retardation	Umbilical_hernia	Thrombocytopenia	Malformation_of_the_heart_and_great_vessels	Wormian_bones	Scoliosis	Recurrent_fractures	Kyphosis	Abnormality_of_femur_morphology	Genu_valgum	Femoral_bowing	Micromelia	Abnormality_of_tibia_morphology	Slender_long_bone	Abnormal_cortical_bone_morphology	Protrusio_acetabuli	Abnormality_of_the_hip_bone	Abnormal_form_of_the_vertebral_bodies	Abnormality_of_the_endocardium	Short_stature	Decreased_skull_ossification	Biconcave_vertebral_bodies	Diaphyseal_thickening
Mucopolysaccharidosis_type_3	Inguinal_hernia	Hearing_impairment	Chronic_otitis_media	Cataract	Myopia	Abnormality_of_the_ribs	Abnormality_of_the_clavicle	Seizures	Ataxia	Hypertonia	Hip_dysplasia	Joint_stiffness	Umbilical_hernia	Vocal_cord_paresis	Splenomegaly	Malabsorption	Coarse_hair	Generalized_hirsutism	Hepatomegaly	Sleep_disturbance	Developmental_regression	Scoliosis	Genu_valgum	Abnormal_form_of_the_vertebral_bodies	Craniofacial_hyperostosis	Intellectual_disability_progressive	Mucopolysacchariduria	Intellectual_disability_severe	Abnormal_aortic_valve_morphology	Abnormal_facial_shape	Abnormal_mitral_valve_morphology	Abnormal_myocardium_morphology	Abnormal_pyramidal_sign	Abnormal_temper_tantrums	Abnormality_of_skeletal_morphology	Abnormality_of_the_dentition	Abnormality_of_the_middle_ear_ossicles	Aggressive_behavior	Aspiration_pneumonia	Atrioventricular_block	Avascular_necrosis_of_the_capital_femoral_epiphysis	Cardiomegaly	Central_nervous_system_degeneration	Conductive_hearing_impairment	Constipation	Constrictive_median_neuropathy	Delayed_speech_and_language_development	Dementia	Dolichocephaly
Hirschsprung_disease	Sensorineural_hearing_impairment	Adducted_thumb	Intellectual_disability	Failure_to_thrive_in_infancy	Weight_loss	Diarrhea	Nausea_and_vomiting	Constipation	Abdominal_pain	Aganglionic_megacolon	Short_stature	Intestinal_obstruction	Functional_abnormality_of_the_gastrointestinal_tract	Neoplasm_of_the_thyroid_gland	Sepsis	Intestinal_polyposis
Glycogen_storage_disease_due_to_glucose-6-phosphatase_deficiency	Full_cheeks	Xanthomatosis	Seizures	Muscular_hypotonia	Hypoglycemia	Hyperuricemia	Recurrent_respiratory_infections	Recurrent_infections	Hyperlipidemia	Short_stature	Cognitive_impairment
Gaucher_disease	Proteinuria	Gingival_bleeding	Hydrocephalus	Hearing_impairment	Strabismus	Retinopathy	Oculomotor_apraxia	Depressivity	Hematuria	Delayed_puberty	Abnormality_of_the_skeletal_system	Osteopenia	Abnormality_of_skin_pigmentation	Abnormal_macular_morphology	Ataxia	Muscular_hypotonia	Tremor	Joint_dislocation	Joint_stiffness	Cirrhosis	Death_in_infancy	Abnormal_myocardium_morphology	Abnormal_heart_valve_morphology	Abnormal_pericardium_morphology	Splenomegaly	Hydrops_fetalis	Thrombocytopenia	Pancytopenia	Abnormal_bleeding	Anemia	Fever	Dysphagia	Abdominal_pain	Generalized_tonic-clonic_seizures	Abnormality_of_extrapyramidal_motor_function	Pulmonary_arterial_hypertension	Respiratory_insufficiency	Ventriculomegaly	Generalized_myoclonic_seizures	Pulmonary_fibrosis	Hepatomegaly	Developmental_regression	Bone_pain	Delayed_skeletal_maturation	Osteomyelitis	Recurrent_fractures	Osteoarthritis	Osteolysis	Arthrogryposis_multiplex_congenita
GM1_gangliosidosis	Inguinal_hernia	Abnormality_of_the_scrotum	Macroglossia	Gingival_overgrowth	Coarse_facial_features	Mandibular_prognathia	Long_philtrum	Macrotia	Broad_nasal_tip	Depressed_nasal_ridge	Strabismus	Blindness	Nystagmus	Optic_atrophy	Abnormal_diaphysis_morphology	Abnormality_of_the_metaphysis	Abnormality_of_the_skin	Seizures	Ataxia	Muscular_hypotonia	Spasticity	Tremor	Hyperreflexia	Joint_stiffness	Congestive_heart_failure	Splenomegaly	Weight_loss	Frontal_bossing	Recurrent_respiratory_infections	Generalized_hirsutism	Encephalitis	Scoliosis	Skeletal_dysplasia	Arthralgia	Hyperlordosis	Abnormal_form_of_the_vertebral_bodies	Short_stature	Abnormality_of_ganglioside_metabolism	Depressed_nasal_bridge	Abnormality_of_epiphysis_morphology	Generalized_dystonia	Corneal_opacity	Abnormal_retinal_vascular_morphology	Aplasia/Hypoplasia_of_the_abdominal_wall_musculature	Cherry_red_spot_of_the_macula	Abnormality_of_movement	Camptodactyly_of_finger	Rough_bone_trabeculation	Abnormal_heart_morphology
Waardenburg_syndrome	Abnormality_of_the_uterus	Abnormality_of_the_vagina	Abnormality_of_the_mouth	Abnormal_lip_morphology	Oral_cleft	Abnormality_of_the_face	Hearing_impairment	Conductive_hearing_impairment	Prominent_nasal_bridge	Underdeveloped_nasal_alae	Wide_nasal_bridge	Abnormality_of_the_eye	Abnormality_of_vision	Telecanthus	Ptosis	Abnormal_eyebrow_morphology	Lacrimation_abnormality	Synophrys	Abnormality_of_skin_pigmentation	Hypopigmented_skin_patches	Heterochromia_iridis	Abnormal_facial_shape	White_forelock	Premature_graying_of_hair	Aganglionic_megacolon	Myelomeningocele	Intestinal_obstruction	Hypopigmentation_of_hair	Abnormality_of_the_gastrointestinal_tract	Aplasia/Hypoplasia_of_the_colon
Usher_syndrome	Decreased_fertility	Tinnitus	Sensorineural_hearing_impairment	Astigmatism	Visual_impairment	Abnormal_electroretinogram	Cataract	Progressive_visual_loss	Myopia	Blindness	Nystagmus	Nyctalopia	Carious_teeth	Abnormality_of_dental_eNAME	Microdontia	Psychosis	Depressivity	Hallucinations	Anxiety	Visual_field_defect	Ataxia	Hypertrophic_cardiomyopathy	Vestibular_dysfunction	Cerebral_cortical_atrophy	Myopathy	EMG_abnormality	Aplasia/Hypoplasia_of_the_cerebellum	Abnormality_of_retinal_pigmentation	High_hypermetropia	Vestibular_areflexia	Hyperacusis	Abnormality_of_cardiovascular_system_physiology	Abnormality_of_dental_color	Cognitive_impairment
Retinitis_pigmentosa	Abnormal_testis_morphology	Hypogonadism	Conductive_hearing_impairment	Sensorineural_hearing_impairment	Wide_nasal_bridge	Anteverted_nares	Glaucoma	Visual_impairment	Abnormal_electroretinogram	Cataract	Keratoconus	Ophthalmoplegia	Photophobia	Blindness	Nystagmus	Optic_atrophy	Hyperinsulinemia	Atypical_scarring_of_skin	Intellectual_disability	Hyperreflexia	Obesity	Type_II_diabetes_mellitus	Progressive_night_blindness	Abnormality_of_retinal_pigmentation	Abnormal_retinal_vascular_morphology	Hypoplasia_of_penis
Porphyria	Behavioral_abnormality	Hallucinations	Hypertension	Pruritus	Cutaneous_photosensitivity	Abnormality_of_skin_pigmentation	Seizures	Muscle_weakness	Fever	Diarrhea	Nausea_and_vomiting	Constipation	Abdominal_pain	Anorexia	Sleep_disturbance	Paresthesia	Dupuytren_contracture	Abnormal_blistering_of_the_skin	Abnormal_circulating_porphyrin_concentration	Abnormal_urinary_color	Fatigue	Cerebral_palsy	Chest_pain
Pelizaeus-Merzbacher_disease	Abnormality_of_the_urinary_system	Microcephaly	Hearing_impairment	Visual_impairment	Nystagmus	Optic_atrophy	Abnormality_of_visual_evoked_potentials	Behavioral_abnormality	Intellectual_disability	Seizures	Ataxia	Muscular_hypotonia	Spasticity	Choreoathetosis	Gait_disturbance	Dystonia	Joint_stiffness	Failure_to_thrive_in_infancy	Premature_birth	Respiratory_insufficiency	Cerebral_cortical_atrophy	Neurological_speech_impairment	Recurrent_respiratory_infections	Developmental_regression	Bowel_incontinence	Scoliosis	Kyphosis	Short_stature	Cachexia	Peripheral_neuropathy	Abnormality_of_movement	Arteriovenous_malformation
X-linked_recessive_ocular_albinism	Astigmatism	Strabismus	Visual_impairment	Myopia	Photophobia	Abnormal_pupil_morphology	Nystagmus	Abnormal_macular_morphology	Ocular_albinism	Freckling	Giant_melanosomes_in_melanocytes	Iris_hypopigmentation	Hypoplasia_of_the_fovea	Neoplasm_of_the_skin
Phenylketonuria	Malformation_of_the_heart_and_great_vessels	Aminoaciduria	Intellectual_disability_severe
Chondrodysplasia-disorder_of_sex_development_syndrome	Male_pseudohermaphroditism	Microcephaly	Macrotia	Strabismus	Deeply_set_eye	Telecanthus	Chorioretinal_coloboma	Blepharophimosis	Miosis	Narrow_chest	Intellectual_disability	Brain_very_small	Intrauterine_growth_retardation	Abnormality_of_pelvic_girdle_bone_morphology	Micromelia	Abnormality_of_the_shoulder	Severe_short_stature	Increased_skull_ossification	Broad_long_bones	Hypoplasia_of_the_iris	Short_phalanx_of_finger	Short_metacarpal
Weaver_syndrome	Inguinal_hernia	Cryptorchidism	Tall_stature	Macrocephaly	Retrognathia	Round_face	Hypertelorism	Broad_forehead	Long_philtrum	Micrognathia	Low-set_posteriorly_rotated_ears	Macrotia	Downslanted_palpebral_fissures	Abnormality_of_the_metaphysis	Large_hands	Abnormal_fingernail_morphology	Intellectual_disability	Spasticity	Global_developmental_delay	Hypertonia	Joint_stiffness	Redundant_skin	Hoarse_voice	Pes_cavus	Talipes_equinovarus	Broad_foot	Hypoplastic_toenails	Deep-set_nails	Thin_nail	Sandal_gap	Deep_philtrum	Fine_hair	Malformation_of_the_heart_and_great_vessels	Scoliosis	Accelerated_skeletal_maturation	Joint_hyperflexibility	Finger_syndactyly	Hypoplasia_of_penis	Feeding_difficulties_in_infancy	Abnormally_low-pitched_voice	Broad_thumb	Camptodactyly_of_finger
Fanconi_anemia	Recurrent_urinary_tract_infections	Azoospermia	Cryptorchidism	Abnormal_testis_morphology	Hypospadias	Hydroureter	Abnormality_of_the_urinary_system	Abnormality_of_the_uterus	Hypogonadism	Cleft_palate	High_palate	Hydrocephalus	Dolichocephaly	Hypertelorism	Facial_asymmetry	Sloping_forehead	Micrognathia	Hearing_abnormality	Hearing_impairment	Choanal_atresia	Abnormality_of_the_eye	Astigmatism	Strabismus	Abnormal_eyelid_morphology	Renal_insufficiency	Microcephaly	Epicanthus	Abnormality_of_vision	Visual_impairment	Ptosis	Cataract	Proptosis	Microphthalmia	Upslanted_palpebral_fissure	Nystagmus	Bicornuate_uterus	Abnormality_of_the_hypothalamus-pituitary_axis	Abnormality_of_skin_pigmentation	Hypopigmented_skin_patches	Abnormal_thumb_morphology	Triphalangeal_thumb	Intellectual_disability	Global_developmental_delay	Hyperreflexia	Abnormality_of_the_liver	Growth_delay	Intrauterine_growth_retardation	Umbilical_hernia	Oligohydramnios
Familial_isolated_dilated_cardiomyopathy	Sensorineural_hearing_impairment	Palmoplantar_keratoderma	Dilated_cardiomyopathy	Abnormality_of_neutrophils	Myopathy	Elevated_serum_creatine_kinase	EMG_abnormality	Lipoatrophy
Eosinophilic_fasciitis	Edema	Acrocyanosis	Arthritis	Subcutaneous_nodule	Weight_loss	Abnormality_of_eosinophils	Eosinophilia	Arthralgia	Myalgia	Paresthesia	Fatigue	Macule	Fasciitis	Myositis	Cellulitis	Muscular_edema
Congenital_hypothyroidism	Abnormality_of_reproductive_system_physiology	Hypogonadism	Macroglossia	Oral_cleft	Large_fontanelles	Sinusitis	Abnormality_of_the_face	Coarse_facial_features	Hearing_impairment	Depressed_nasal_ridge	Anosmia	Abnormality_of_the_eye	Abnormal_eyelid_morphology	Abnormality_of_vision	Cataract	Optic_atrophy	Depressivity	Anxiety	Nephrolithiasis	Abnormality_of_the_thyroid_gland	Hypothyroidism	Hypertension	Anterior_hypopituitarism	Goiter	Angiokeratoma_corporis_diffusum	Intellectual_disability	Muscular_hypotonia	Global_developmental_delay	Reduced_tendon_reflexes	Umbilical_hernia	Abnormality_of_the_hair	Hoarse_cry	Abnormal_pericardium_morphology	Constipation	Hypothermia	Sleep_disturbance	Tracheoesophageal_fistula	Hypotension	Abdominal_distention	Paresthesia	Short_stature	Large_posterior_fontanelle	Intestinal_obstruction	Abnormality_of_epiphysis_morphology	Prolonged_neonatal_jaundice	Thyroid_dysgenesis	Feeding_difficulties_in_infancy	Intellectual_disability_severe	Arrhythmia
Granulomatosis_with_polyangiitis	Prostatitis	Ureteral_stenosis	Renal_insufficiency	Proteinuria	Hydronephrosis	Abnormal_oral_cavity_morphology	Sinusitis	Abnormality_of_the_nose	Otitis_media	Chronic_otitis_media	Sensorineural_hearing_impairment	Epistaxis	Retinopathy	Visual_impairment	Proptosis	Sensory_neuropathy	Hematuria	Hypertension	Abnormality_of_the_hypothalamus-pituitary_axis	Diabetes_insipidus	Purpura	Skin_rash	Seizures	Meningitis	Angina_pectoris	Pericarditis	Pancreatitis	Weight_loss	Fever	Nausea_and_vomiting	Abdominal_pain	Restrictive_ventilatory_defect	Respiratory_insufficiency	Pleuritis	Hemoptysis	Pulmonary_infiltrates	Recurrent_respiratory_infections	Pulmonary_fibrosis	Gastrointestinal_hemorrhage	Hemiplegia	Headache	Vasculitis	Cerebral_ischemia	Arthralgia	Granulomatosis	Autoimmunity	Myalgia	Elevated_erythrocyte_sedimentation_rate	Venous_thrombosis
Immunoglobulin_A_vasculitis	Renal_insufficiency	Proteinuria	Optic_atrophy	Hematuria	Edema	Bruising_susceptibility	Purpura	Skin_rash	Urticaria	Seizures	Muscle_weakness	Arthritis	Fever	Nausea_and_vomiting	Abdominal_pain	Anorexia	Migraine	Restrictive_deficit_on_pulmonary_function_testing	Gastrointestinal_hemorrhage	Encephalitis	Vasculitis	Arthralgia	Myalgia	Hemiplegia/hemiparesis	Gastrointestinal_infarctions	Erythema	Vascular_skin_abnormality	Macule	Episcleritis	Angioedema	Orchitis	Glomerulopathy	Pustule	Skin_ulcer
Anti-glomerular_basement_membrane_disease	Renal_insufficiency	Proteinuria	Retinal_detachment	Hematuria	Purpura	Arthritis	Anemia	Fever	Respiratory_insufficiency	Hemoptysis	Pulmonary_infiltrates	Vasculitis	Arthralgia	Autoimmunity	Myalgia	Persistence_of_primary_teeth	Cough	Chest_pain	Glomerulopathy
Microscopic_polyangiitis	Renal_insufficiency	Sinusitis	Epistaxis	Uveitis	Hematuria	Cutis_marmorata	Skin_rash	Arthritis	Subcutaneous_nodule	Congestive_heart_failure	Pericarditis	Pancreatitis	Subcutaneous_hemorrhage	Fever	Diarrhea	Nausea_and_vomiting	Abdominal_pain	Hemoptysis	Gastrointestinal_hemorrhage	Peritonitis	Vasculitis	Arthralgia	Autoimmunity	Myalgia	Paresthesia	Venous_thrombosis	Gastrointestinal_infarctions	Abnormal_retinal_vascular_morphology	Peripheral_neuropathy	Erythema	Arrhythmia	Increased_inflammatory_response	Oliguria	Episcleritis	Gangrene	Glomerulopathy	Skin_ulcer
Locked-in_syndrome	Hearing_impairment	Abnormality_of_the_eye	Abnormality_of_vision	Diplopia	Behavioral_abnormality	Spasticity	Hypertonia	Abnormality_of_the_voice	Respiratory_insufficiency	Recurrent_respiratory_infections	Tetraparesis	Anarthria	Tetraplegia	Excessive_salivation	Feeding_difficulties	Cerebral_palsy
Congenital_herpes_simplex_virus_infection	Microcephaly	Intrauterine_growth_retardation	Premature_birth	Hydranencephaly
Congenital_lobar_emphysema	Emphysema	Respiratory_distress	Abnormality_of_immune_system_physiology
Takayasu_arteritis	Retinopathy	Hypertension	Hyperhidrosis	Seizures	Muscle_weakness	Arthritis	Subcutaneous_nodule	Hypertrophic_cardiomyopathy	Abnormal_aortic_valve_morphology	Abnormal_heart_valve_morphology	Myocardial_infarction	Weight_loss	Anemia	Fever	Anorexia	Migraine	Pulmonary_arterial_hypertension	Hemoptysis	Neurological_speech_impairment	Dilatation	Vasculitis	Cerebral_ischemia	Abnormal_pattern_of_respiration	Arthralgia	Myalgia	Abnormality_of_the_endocardium	Reduced_consciousness/confusion	Dilatation_of_the_ascending_aorta	Gastrointestinal_infarctions	Fatigue	Increased_inflammatory_response	Inflammatory_abnormality_of_the_eye	Arterial_stenosis	Amaurosis_fugax	Hypertensive_crisis	Chest_pain	Gangrene	Skin_ulcer
Dubin-Johnson_syndrome	Jaundice	Biliary_tract_abnormality	Abnormality_of_the_liver	Abnormality_of_coagulation	Fever	Abdominal_pain	Hepatomegaly	Conjugated_hyperbilirubinemia	Abnormality_of_the_gastric_mucosa	Abnormal_urinary_color	Fatigue
Whipple_disease	Hydrocephalus	Proptosis	Uveitis	Depressivity	Hypothyroidism	Insulin_resistance	Seizures	Ataxia	Muscle_weakness	Myoclonus	Arthritis	Myocardial_infarction	Pericarditis	Splenomegaly	Anemia	Fever	Polydipsia	Diarrhea	Malabsorption	Abdominal_pain	Anorexia	Respiratory_insufficiency	Pleuritis	Gastrointestinal_hemorrhage	Hepatomegaly	Sleep_disturbance	Developmental_regression	Encephalitis	Increased_intracranial_pressure	Hypotension	Arthralgia	Hyponatremia	Myalgia	Cachexia	Cranial_nerve_paralysis	Abnormal_pyramidal_sign	Generalized_hyperpigmentation	Peripheral_neuropathy	Pedal_edema	Fatigue	Cough	Myocarditis	Myositis	Erectile_dysfunction	Mediastinal_lymphadenopathy	Chest_pain	Galactorrhea
Kawasaki_disease	Proteinuria	Conjunctivitis	Skin_rash	Vasculitis	Cervical_lymphadenopathy	Palmoplantar_erythema	Recurrent_pharyngitis	Cheilitis	Glossitis	Edema	Arthritis	Abnormal_heart_valve_morphology	Pericarditis	Fever	Leukocytosis	Diarrhea	Abdominal_pain	Fatigue	Abnormality_of_nail_color	Ptosis	Irritability	Jaundice	Cholecystitis	Meningitis	Congestive_heart_failure	Nausea_and_vomiting	Migraine	Arthralgia	Dilatation_of_the_ascending_aorta	Interstitial_pulmonary_abnormality	Cranial_nerve_paralysis	Double_outlet_right_ventricle_with_subpulmonary_ventricular_septal_defect_without_pulmonary_stenosis	Arrhythmia	Hepatitis	Myocarditis	Sterile_pyuria
Congenital_respiratory-biliary_fistula	Abnormality_of_the_liver	Tracheal_stenosis
Congenital_atransferrinemia	Hypothyroidism	Arthritis	Abnormality_of_the_cardiovascular_system	Abnormality_of_the_pancreas	Anemia	Recurrent_infections
Multiminicore_myopathy	Myopathy	Congenital_muscular_dystrophy	Minicore_myopathy	Strabismus	Generalized_hypotonia	Joint_stiffness	Failure_to_thrive	Respiratory_insufficiency	Scoliosis	Respiratory_insufficiency_due_to_muscle_weakness	Spinal_rigidity	EMG_abnormality	Abnormal_muscle_fiber_morphology	Short_stature	Joint_hyperflexibility	Proximal_muscle_weakness_in_lower_limbs	Proximal_muscle_weakness_in_upper_limbs	External_ophthalmoplegia	Malignant_hyperthermia	Distal_muscle_weakness	Arthrogryposis_multiplex_congenita
Polymyositis	Abnormal_renal_tubule_morphology	Chondrocalcinosis	Muscular_hypotonia	Gait_disturbance	Reduced_tendon_reflexes	Arthritis	Abnormality_of_the_voice	Dysphonia	Abnormal_mitral_valve_morphology	Congestive_heart_failure	Hypertrophic_cardiomyopathy	Dilated_cardiomyopathy	Myocardial_infarction	Pericarditis	Weight_loss	Fever	Constipation	Gastroesophageal_reflux	Abdominal_pain	Anorexia	Respiratory_insufficiency	Pulmonary_fibrosis	Gastrointestinal_hemorrhage	Hepatomegaly	Vasculitis	Arthralgia	Exertional_dyspnea	Autoimmunity	Breast_carcinoma	Elevated_serum_creatine_kinase	Myalgia	EMG_abnormality	Proximal_muscle_weakness	Abnormal_muscle_fiber_morphology	Venous_thrombosis	Abnormal_atrioventricular_conduction	Interstitial_pulmonary_abnormality	Arrhythmia	Fatigue	Elevated_aldolase_level	Cough
Dermatomyositis	Abnormal_eyelid_morphology	Chondrocalcinosis	Dry_skin	Edema	Pruritus	Cutaneous_photosensitivity	Acrocyanosis	Muscular_hypotonia	Arthritis	Abnormality_of_the_nail	Abnormality_of_the_voice	Dysphonia	Myocardial_infarction	Pericarditis	Weight_loss	Abnormality_of_eosinophils	Fever	Pulmonary_arterial_hypertension	Respiratory_insufficiency	Recurrent_respiratory_infections	Pulmonary_fibrosis	Diffuse_reticular_or_finely_nodular_infiltrations	Vasculitis	Neoplasm	Lymphoma	Arthralgia	Autoimmunity	Breast_carcinoma	Myalgia	EMG_abnormality	Proximal_muscle_weakness	Interstitial_pulmonary_abnormality	Aplasia/Hypoplasia_of_the_skin	Feeding_difficulties_in_infancy	Inflammatory_myopathy	Erythema	Abnormal_hair_quantity	Arrhythmia	Sinus_tachycardia	Fatigue	Myocarditis	Lung_adenocarcinoma	Periorbital_edema	Telangiectasia_of_the_skin	Cellulitis	Gastrointestinal_stroma_tumor	Gangrene	Papule	Skin_ulcer
Beh√ßet_disease	Renal_insufficiency	Oral_ulcer	Retinopathy	Cataract	Photophobia	Behavioral_abnormality	Acne	Keratoconjunctivitis_sicca	Seizures	Ataxia	Hemiparesis	Hyperreflexia	Arthritis	Subcutaneous_nodule	Abnormal_myocardium_morphology	Mitral_regurgitation	Aortic_regurgitation	Pericarditis	Splenomegaly	Weight_loss	Anorexia	Migraine	Pleuritis	Hemoptysis	Pleural_effusion	Gastrointestinal_hemorrhage	Memory_impairment	Encephalitis	Increased_intracranial_pressure	Vasculitis	Arthralgia	Myalgia	Paresthesia	Venous_thrombosis	Cranial_nerve_paralysis	Abnormal_pyramidal_sign	Avascular_necrosis	Recurrent_aphthous_stomatitis	Fatigue	Increased_inflammatory_response	Immunologic_hypersensitivity	Myositis	Optic_neuritis	Retrobulbar_optic_neuritis	Gangrene	Glomerulopathy	Blindness	Irritability	Meningitis
Oculopharyngeal_muscular_dystrophy	Mask-like_facies	Ptosis	Abnormality_of_the_pharynx	Ophthalmoplegia	Myopathy	Ragged-red_muscle_fibers	Elevated_serum_creatine_kinase	Spondylolisthesis	Rimmed_vacuoles	Abnormal_muscle_fiber_morphology
Alpha-N-acetylgalactosaminidase_deficiency	Coarse_facial_features	Hearing_impairment	Strabismus	Cataract	Blindness	Nystagmus	Autism	Lymphedema	Intellectual_disability	Seizures	Muscular_hypotonia	Spasticity	Global_developmental_delay	Cerebellar_hypoplasia	Cardiomegaly	Constipation	Gastroesophageal_reflux	Cerebral_cortical_atrophy	Clonus	Vertigo	Developmental_regression	Tetraplegia	Scoliosis	Recurrent_pneumonia	Peripheral_neuropathy	Oligosacchariduria	Vascular_skin_abnormality	Thick_vermilion_border
Inclusion_body_myositis	Reduced_tendon_reflexes	Autoimmunity	Ragged-red_muscle_fibers	Skeletal_muscle_atrophy	Elevated_serum_creatine_kinase	Myalgia	EMG_abnormality	Proximal_muscle_weakness	Quadriceps_muscle_weakness	Rimmed_vacuoles	Abnormal_muscle_fiber_morphology	Feeding_difficulties_in_infancy	Inflammatory_myopathy
Larynx_atresia	Laryngomalacia	Abnormality_of_the_voice	Respiratory_insufficiency	Recurrent_respiratory_infections	Malformation_of_the_heart_and_great_vessels	Short_stature
Gastroschisis	Gastroschisis	Intestinal_atresia	Abnormality_of_mesentery_morphology
Allergic_bronchopulmonary_aspergillosis	Abnormal_fingernail_morphology	Weight_loss	Abnormality_of_eosinophils	Pulmonary_arterial_hypertension	Respiratory_insufficiency	Emphysema	Asthma	Hemoptysis	Abnormality_of_the_bronchi	Bronchiectasis	Cerebral_cortical_atrophy	Abnormality_of_the_immune_system	Low-grade_fever	Cough
Eosinophilic_granulomatosis_with_polyangiitis	Renal_insufficiency	Proteinuria	Sinusitis	Hematuria	Hypertension	Cutis_marmorata	Purpura	Skin_rash	Urticaria	Hypopigmented_skin_patches	Acrocyanosis	Gait_disturbance	Arthritis	Subcutaneous_nodule	Congestive_heart_failure	Hypertrophic_cardiomyopathy	Myocardial_infarction	Abnormal_pericardium_morphology	Weight_loss	Eosinophilia	Fever	Tubulointerstitial_nephritis	Dysphagia	Nausea_and_vomiting	Gastroesophageal_reflux	Malabsorption	Abdominal_pain	Respiratory_insufficiency	Asthma	Abnormality_of_the_pleura	Hemoptysis	Pulmonary_infiltrates	Transient_ischemic_attack	Vasculitis	Arthralgia	Autoimmunity	Myalgia	Hemiplegia/hemiparesis	Venous_thrombosis	Intestinal_obstruction	Recurrent_intrapulmonary_hemorrhage	Cranial_nerve_paralysis	Central_nervous_system_degeneration	Peripheral_neuropathy	Fatigue	Increased_inflammatory_response	Cough	Myocarditis	Nasal_polyposis
Maple_syrup_urine_disease	Abnormality_of_the_pharynx	Intellectual_disability	Seizures	Ataxia	Muscular_hypotonia	Global_developmental_delay	Reduced_tendon_reflexes	Abnormality_of_the_voice	Respiratory_insufficiency	Hemiplegia/hemiparesis	Elevated_plasma_branched_chain_amino_acids
Methylmalonic_acidemia_with_homocystinuria	Microcephaly	Retinopathy	Amblyopia	Intellectual_disability	Seizures	Muscular_hypotonia	Lethargy	Global_developmental_delay	Failure_to_thrive	Megaloblastic_bone_marrow	Feeding_difficulties	Fatigue	Hydrocephalus	Behavioral_abnormality	Gait_disturbance	Malformation_of_the_heart_and_great_vessels	Abnormality_of_movement	Skin_rash
Glutathione_synthetase_deficiency	Abnormality_of_the_nervous_system	Hemolytic_anemia	Chronic_metabolic_acidosis	Glutathione_synthetase_deficiency	Abnormality_of_immune_system_physiology
Juvenile_idiopathic_arthritis	Uveitis	Skin_rash	Thickened_skin	Abnormal_fingernail_morphology	Abnormal_joint_morphology	Arthritis	Joint_dislocation	Joint_swelling	Joint_stiffness	Abnormality_of_the_nail	Pericardial_effusion	Splenomegaly	Nail_pits	Fever	Malabsorption	Abdominal_pain	Abnormality_of_the_pleura	Hepatomegaly	Arthralgia	Autoimmunity	Psoriasiform_dermatitis	Generalized_hyperkeratosis	Mediastinal_lymphadenopathy	Cartilage_destruction	Abnormality_of_the_sacroiliac_joint
Alpha-thalassemia-X-linked_intellectual_disability_syndrome	Recurrent_urinary_tract_infections	Cryptorchidism	Male_pseudohermaphroditism	Ambiguous_genitalia	Abnormality_of_the_kidney	Hydronephrosis	Macroglossia	Abnormality_of_the_dentition	Thick_lower_lip_vermilion	Everted_lower_lip_vermilion	Microcephaly	Abnormality_of_the_face	Epicanthus	Hypertelorism	Sensorineural_hearing_impairment	Depressed_nasal_ridge	Anteverted_nares	Telecanthus	Myopia	Blindness	Optic_atrophy	Behavioral_abnormality	Depressivity	Autism	Brachydactyly	Intellectual_disability	Seizures	Muscular_hypotonia	Spastic_paraplegia	Agenesis_of_corpus_callosum	Flexion_contracture	Joint_stiffness	Death_in_infancy	Talipes_equinovarus	Anemia	Nausea_and_vomiting	Constipation	Gastroesophageal_reflux	Cerebral_cortical_atrophy	Aganglionic_megacolon	Dysphasia	Encephalitis	Volvulus	Clinodactyly_of_the_5th_finger	Short_stature	Hypoplasia_of_penis	Feeding_difficulties_in_infancy	Abnormality_of_the_male_genitalia	Tented_upper_lip_vermilion
Familial_Mediterranean_fever	Proteinuria	Nephrotic_syndrome	Nephropathy	Nephrocalcinosis	Skin_rash	Erysipelas	Seizures	Meningitis	Arthritis	Ascites	Myocardial_infarction	Pericarditis	Pancreatitis	Splenomegaly	Fever	Diarrhea	Nausea_and_vomiting	Constipation	Malabsorption	Abdominal_pain	Pleuritis	Peritonitis	Vasculitis	Lymphadenopathy	Oral_leukoplakia	Osteoarthritis	Arthralgia	Myalgia	Elevated_erythrocyte_sedimentation_rate	Intestinal_obstruction	Gastrointestinal_infarctions	Acute_hepatic_failure	Pedal_edema	Erythema	Arrhythmia	Chest_pain	Orchitis
Simpson-Golabi-Behmel_syndrome	Multicystic_kidney_dysplasia	Inguinal_hernia	Cryptorchidism	Hypospadias	Hydroureter	Ureteral_duplication	Tall_stature	Hydronephrosis	Wide_mouth	Macroglossia	Cleft_palate	Cleft_upper_lip	Macrocephaly	Coarse_facial_features	Epicanthus	Mandibular_prognathia	Hypertelorism	Low-set_posteriorly_rotated_ears	Wide_nasal_bridge	Anteverted_nares	Webbed_neck	Short_neck	Downslanted_palpebral_fissures	Pectus_excavatum	Abnormality_of_the_ribs	Congenital_diaphragmatic_hernia	Postaxial_hand_polydactyly	Intellectual_disability	Seizures	Muscular_hypotonia	Global_developmental_delay	Agenesis_of_corpus_callosum	Dandy-Walker_malformation	Congenital_hip_dislocation	Death_in_infancy	Umbilical_hernia	Omphalocele	Polyhydramnios	Abnormality_of_the_voice	Hoarse_voice	Ventricular_septal_defect	Atrial_septal_defect	Cardiomyopathy	Prolonged_QT_interval	Splenomegaly	Polysplenia	Talipes_equinovarus	Broad_foot	Toe_syndactyly
Androgen_insensitivity_syndrome	Abnormal_morphology_of_female_internal_genitalia	Inguinal_hernia	Cryptorchidism	Ambiguous_genitalia_male	Male_pseudohermaphroditism	Abnormality_of_the_uterus	Delayed_puberty	Sparse_axillary_hair	Absent_axillary_hair	Sparse_pubic_hair	Absent_pubic_hair	Male_infertility	Aplasia/Hypoplasia_of_the_fallopian_tube	Aplasia/hypoplasia_of_the_uterus	Testicular_neoplasm
Multiple_symmetric_lipomatosis	Insulin_resistance	Multiple_lipomas	Gait_disturbance	Reduced_tendon_reflexes	Joint_stiffness	Hepatomegaly	Arthralgia	Paresthesia	Abnormal_adipose_tissue_morphology	Peripheral_neuropathy
Dermatitis_herpetiformis	Eczema	Edema	Pruritus	Urticaria	Microcytic_anemia	Malabsorption	Bone_pain	Recurrent_fractures	Autoimmunity	Abnormal_blistering_of_the_skin	Erythema	Macule	Lichenification	Skin_vesicle
Mucopolysaccharidosis_type_4	Wide_mouth	Abnormality_of_the_dentition	Macrocephaly	Coarse_facial_features	Hearing_impairment	Anteverted_nares	Short_neck	Carious_teeth	Grayish_eNAME	Pectus_carinatum	Abnormality_of_the_ribs	Platyspondyly	Abnormality_of_the_metaphysis	Gait_disturbance	Joint_dislocation	Abnormal_heart_valve_morphology	Scoliosis	Coxa_valga	Delayed_skeletal_maturation	Kyphosis	Genu_valgum	Spinal_canal_stenosis	Short_stature	Reduced_bone_mineral_density	Joint_hyperflexibility	Abnormality_of_epiphysis_morphology	Bowing_of_the_long_bones	Corneal_opacity	Abnormality_of_dental_eNAME	Hyperlordosis	Mucopolysacchariduria	Short_thorax	Cognitive_impairment	Hernia
Giant_cell_arteritis	Renal_insufficiency	Glossitis	Hearing_impairment	Conductive_hearing_impairment	Epistaxis	Visual_impairment	Ptosis	Visual_loss	Ophthalmoparesis	Nystagmus	Optic_atrophy	Diplopia	Depressivity	Hematuria	Diabetes_insipidus	Hyperhidrosis	Visual_field_defect	Ataxia	Meningitis	Muscle_weakness	Arthritis	Joint_stiffness	Hepatic_failure	Alopecia	Sudden_cardiac_death	Pericarditis	Weight_loss	Abnormality_of_thrombocytes	Fever	Abdominal_pain	Anorexia	Abnormality_of_the_pleura	Headache	Vertigo	Vasculitis	Cerebral_ischemia	Aortic_dissection	Arthralgia	Myalgia	Paresthesia	Elevated_erythrocyte_sedimentation_rate	Arterial_thrombosis	Dilatation_of_abdominal_aorta	Impaired_mastication	Gastrointestinal_infarctions	Peripheral_neuropathy	Double_outlet_right_ventricle_with_subpulmonary_ventricular_septal_defect_without_pulmonary_stenosis	Arrhythmia	Fatigue
Budd-Chiari_syndrome	Jaundice	Cholecystitis	Cirrhosis	Portal_hypertension	Ascites	Splenomegaly	Weight_loss	Fever	Malabsorption	Abdominal_pain	Esophageal_varix	Gastrointestinal_hemorrhage	Hepatomegaly	Peritonitis	Elevated_hepatic_transaminase	Intestinal_obstruction	Gastrointestinal_infarctions	Acute_hepatic_failure
Niemann-Pick_disease_type_C	Behavioral_abnormality	Jaundice	Seizures	Ataxia	Dysarthria	Global_developmental_delay	Gait_disturbance	Dystonia	Tremor	Dysphonia	Splenomegaly	Dysphagia	Chorea	Neurological_speech_impairment	Hepatomegaly	Sleep_disturbance	Developmental_regression	Abnormal_pyramidal_sign	Aplasia/Hypoplasia_of_the_abdominal_wall_musculature	Cognitive_impairment	Abnormal_CNS_myelination	Abnormal_social_behavior	Abnormality_of_higher_mental_function	Abnormality_of_movement	Abnormality_of_the_liver	Aggressive_behavior	Apathy	Auditory_hallucinations	Axial_dystonia	Bone-marrow_foam_cells	Cataplexy	Central_hypotonia	Cerebellar_vermis_atrophy	Cerebral_atrophy	Clumsiness	Delayed_speech_and_language_development	Dementia	Depressivity	Disinhibition	Feeding_difficulties	Foam_cells	Focal-onset_seizure	Frequent_falls	Gastrostomy_tube_feeding_in_infancy	Generalized-onset_seizure	Hearing_impairment	Hepatosplenomegaly	Hypoplasia_of_the_corpus_callosum	Intellectual_disability
Nephroblastoma	Aniridia	Hematuria	Hypertension	Weight_loss	Fever	Abdominal_pain	Neoplasm	Nephroblastoma	Lymphadenopathy	Neoplasm_of_the_liver	Neoplasm_of_the_lung
Legg-Calv√©-Perthes_disease	Abnormality_of_the_dentition	Joint_dislocation	Delayed_skeletal_maturation	Arthralgia	Skeletal_muscle_atrophy	Short_stature	Avascular_necrosis	Cartilage_destruction
Rabies	Depressivity	Hallucinations	Anxiety	Seizures	Sudden_cardiac_death	Fever	Diarrhea	Nausea_and_vomiting	Anorexia	Migraine	Paresthesia	Excessive_salivation	Reduced_consciousness/confusion	Attention_deficit_hyperactivity_disorder	Cerebral_palsy	Recurrent_pharyngitis	Insomnia	Behavioral_abnormality	Vocal_cord_paresis
Botulism	Urinary_retention	Xerostomia	Diplopia	Dysarthria	Diarrhea	Dysphagia	Nausea_and_vomiting	Constipation	Abdominal_pain	Respiratory_insufficiency	Diaphragmatic_paralysis	Cranial_nerve_paralysis	Muscle_flaccidity	Mydriasis	Arrhythmia	Cerebral_palsy	Diaphragmatic_weakness	Fatigue
Pityriasis_rubra_pilaris	Abnormal_oral_cavity_morphology	Eczema	Palmoplantar_keratoderma	Pruritus	Erythroderma	Thickened_skin	Abnormality_of_the_nail	Neoplasm	Irregular_hyperpigmentation	Ichthyosis	Subungual_hyperkeratosis	Lichenification	Papule	Pustule
Legionnaires_disease	Renal_insufficiency	Proteinuria	Hallucinations	Hematuria	Jaundice	Ataxia	Muscle_weakness	Pericarditis	Pancreatitis	Splenomegaly	Lymphopenia	Fever	Diarrhea	Nausea_and_vomiting	Abdominal_pain	Anorexia	Migraine	Abnormal_lung_morphology	Restrictive_ventilatory_defect	Respiratory_insufficiency	Abnormality_of_the_pleura	Hemoptysis	Pulmonary_infiltrates	Encephalitis	Hypotension	Lymphadenopathy	Arthralgia	Hyponatremia	Myalgia	Reduced_consciousness/confusion	Bone_marrow_hypocellularity	Peripheral_neuropathy	Arrhythmia	Hepatitis	Fatigue	Cough	Myocarditis	Endocarditis	Cellulitis	Chest_pain	Recurrent_pharyngitis	Sepsis
Wolfram_syndrome	Recurrent_urinary_tract_infections	Male_hypogonadism	Abnormality_of_the_urinary_system	Nephropathy	Hypogonadism	Sensorineural_hearing_impairment	Glaucoma	Ophthalmoplegia	Nystagmus	Optic_atrophy	Behavioral_abnormality	Dementia	Hallucinations	Diabetes_mellitus	Delayed_puberty	Diabetes_insipidus	Intellectual_disability	Seizures	Ataxia	Dysarthria	Joint_stiffness	Cardiomyopathy	Anemia	Polydipsia	Constipation	Malabsorption	Respiratory_insufficiency	Cerebral_cortical_atrophy	Gastrointestinal_hemorrhage	Sleep_disturbance	Developmental_regression	Dysautonomia	Gastric_ulcer	Central_apnea	Myopathy	Feeding_difficulties_in_infancy	Peripheral_neuropathy	Abnormality_of_mesentery_morphology	Dysuria
Pemphigus_vulgaris	Abnormal_oral_cavity_morphology	Atypical_scarring_of_skin	Urticaria	Weight_loss	Recurrent_infections	Autoimmunity	Abnormal_blistering_of_the_skin	Feeding_difficulties_in_infancy	Acantholysis	Recurrent_cutaneous_abscess_formation
Autosomal_dominant_hyper-IgE_syndrome	Abnormality_of_the_dentition	Cleft_palate	Gingivitis	Abnormality_of_the_face	Chronic_otitis_media	Wide_nasal_bridge	Deeply_set_eye	Delayed_eruption_of_teeth	Osteopenia	Eczema	Skin_rash	Pruritus	Craniosynostosis	Abnormality_of_the_hair	Paronychia	Eosinophilia	Fever	Recurrent_respiratory_infections	Dilatation	Scoliosis	Lymphoma	Recurrent_infections	Osteomyelitis	Recurrent_fractures	Increased_circulating_total_IgE_level	Joint_hyperflexibility	Dystrophic_fingernails	Prominent_forehead	Generalized_abnormality_of_skin	Cough	Cellulitis	Atelectasis	Papule	Skin_vesicle	Skin_ulcer
Stickler_syndrome	Macroglossia	Glossoptosis	Cleft_palate	Cleft_upper_lip	Malar_flattening	Epicanthus	Hypertelorism	Hypoplasia_of_the_maxilla	Long_philtrum	Micrognathia	Hearing_impairment	Chronic_otitis_media	Sensorineural_hearing_impairment	Depressed_nasal_ridge	Anteverted_nares	Astigmatism	Strabismus	Glaucoma	Visual_impairment	Telecanthus	Cataract	Proptosis	Retinal_detachment	Myopia	Uveitis	Blindness	Abnormality_of_dental_eNAME	Pectus_carinatum	Platyspondyly	Abnormal_diaphysis_morphology	Ectopia_lentis	Arachnodactyly	Muscular_hypotonia	Joint_dislocation	Disproportionate_tall_stature	Slender_build	Mitral_valve_prolapse	Gastroesophageal_reflux	Recurrent_respiratory_infections	Scoliosis	Skeletal_dysplasia	Bone_pain	Osteoarthritis	Kyphosis	Hip_dislocation	Arthralgia	Genu_valgum	Protrusio_acetabuli	Short_nose
Tetralogy_of_Fallot	Cryptorchidism	Thin_vermilion_border	Dolichocephaly	Broad_forehead	Proptosis	Brachydactyly	Intrauterine_growth_retardation	Tetralogy_of_Fallot	Clinodactyly_of_the_5th_finger	Preauricular_pit	Abnormal_nasal_morphology	Underdeveloped_supraorbital_ridges
Bazex-Dupr√©-Christol_syndrome	Milia	Coarse_hair	Hypotrichosis_of_the_scalp	Sparse_eyebrow	Subcutaneous_nodule	Basal_cell_carcinoma	Pili_torti	Sparse_hair	Trichorrhexis_nodosa	Sparse_or_absent_eyelashes	Macrotia	Abnormality_of_the_clavicle	Abnormality_of_finger	Hypoplasia_of_the_ear_cartilage	Exostoses
46_XX_gonadal_dysgenesis	Gonadal_dysgenesis	Premature_ovarian_insufficiency	Precocious_menopause	Decreased_fertility	Primary_amenorrhea	Delayed_puberty	Increased_circulating_gonadotropin_level	Decreased_serum_estradiol	Abnormality_of_secondary_sexual_hair	Osteopenia	Sparse_pubic_hair	Delayed_skeletal_maturation	Reduced_bone_mineral_density	Osteoporosis_of_vertebrae	Aplasia/hypoplasia_of_the_uterus	Aplasia/Hypoplasia_of_the_breasts	Streak_ovary	Hearing_impairment	Secondary_amenorrhea	Abnormality_of_metabolism/homeostasis	Short_stature
ICF_syndrome	Macroglossia	Macrocephaly	Epicanthus	Hypertelorism	Micrognathia	Low-set_ears	Intellectual_disability	Global_developmental_delay	Communicating_hydrocephalus	Umbilical_hernia	Abnormality_of_neutrophils	Lymphopenia	Anemia	Malabsorption	Recurrent_respiratory_infections	Immunodeficiency	Abnormality_of_chromosome_stability	Decreased_antibody_level_in_blood	Short_stature	Depressed_nasal_bridge	Cellular_immunodeficiency	Protruding_tongue	Flat_face
Joubert_syndrome	Oral_cleft	Hydrocephalus	Long_face	Low-set_ears	Prominent_nasal_bridge	Anteverted_nares	Strabismus	Ptosis	Iris_coloboma	Nystagmus	Oculomotor_apraxia	Abnormality_of_the_hypothalamus-pituitary_axis	Hand_polydactyly	Intellectual_disability	Seizures	Ataxia	Muscular_hypotonia	Global_developmental_delay	Gait_disturbance	Cerebellar_vermis_hypoplasia	Tremor	Situs_inversus_totalis	Foot_polydactyly	Encephalocele	Apnea	Polymicrogyria	Aganglionic_megacolon	Abnormality_of_neuronal_migration	Highly_arched_eyebrow	Malformation_of_the_heart_and_great_vessels	Scoliosis	Abnormal_pattern_of_respiration	Episodic_tachypnea	Abnormal_form_of_the_vertebral_bodies	Biparietal_narrowing	Aplasia/Hypoplasia_of_the_corpus_callosum	Feeding_difficulties_in_infancy
Holt-Oram_syndrome	Pectus_excavatum	Abnormality_of_the_clavicle	Sprengel_anomaly	Split_hand	Joint_stiffness	Abnormality_of_cardiovascular_system_morphology	Abnormality_of_the_metacarpal_bones	Triphalangeal_thumb	Ventricular_septal_defect	Atrial_septal_defect	Atrioventricular_block	Scoliosis	Kyphosis	Paroxysmal_atrial_fibrillation	Aplasia/Hypoplasia_of_the_radius	Absent_thumb	First_degree_atrioventricular_block	Abnormality_of_the_ribs	Patent_ductus_arteriosus	Abnormal_aortic_morphology	Radioulnar_synostosis	Abnormality_of_the_humerus	Hypoplastic_left_heart	Finger_syndactyly	Atrioventricular_canal_defect	Phocomelia	Anomalous_pulmonary_venous_return	Broad_thumb	Down-sloping_shoulders
Roberts_syndrome	Cryptorchidism	Long_penis	Clitoromegaly	Polycystic_kidney_dysplasia	Cleft_palate	Cleft_upper_lip	High_palate	Brachycephaly	Microcephaly	Malar_flattening	Hypertelorism	Micrognathia	Absent_earlobe	Underdeveloped_nasal_alae	Short_neck	Glaucoma	Cataract	Proptosis	Microphthalmia	Blue_sclerae	Nystagmus	Brachydactyly	Wrist_flexion_contracture	Intellectual_disability	Global_developmental_delay	Craniosynostosis	Polyhydramnios	Premature_birth	Sandal_gap	Thrombocytopenia	Malformation_of_the_heart_and_great_vessels	Abnormality_of_the_upper_limb	Radioulnar_synostosis	Hypoplasia_of_the_radius	Clinodactyly_of_the_5th_finger	Mesomelic_arm_shortening	Synostosis_of_carpal_bones	Progressive_flexion_contractures	Finger_syndactyly	Knee_flexion_contracture	Patellar_aplasia	Bowing_of_the_long_bones	Midface_capillary_hemangioma	Bilateral_single_transverse_palmar_creases	Sparse_hair	External_ear_malformation	Severe_intrauterine_growth_retardation	Postnatal_growth_retardation	Radial_deviation_of_finger
Lujan-Fryns_syndrome	Macroorchidism	Abnormality_of_the_dentition	High_palate	Brachycephaly	Macrocephaly	Narrow_face	Short_philtrum	Hypoplasia_of_the_maxilla	Micrognathia	High_forehead	Low-set_ears	Protruding_ear	Prominent_nasal_bridge	Dental_crowding	Behavioral_abnormality	Psychosis	Hallucinations	Pectus_excavatum	Brachydactyly	Arachnodactyly	Intellectual_disability	Seizures	Muscular_hypotonia	Disproportionate_tall_stature	Abnormality_of_the_voice	Nasal_speech	Atrial_septal_defect	Neurological_speech_impairment	Scoliosis	Joint_hyperflexibility	Attention_deficit_hyperactivity_disorder	Aplasia/Hypoplasia_of_the_corpus_callosum	Camptodactyly_of_finger	Schizophrenia
Uveal_coloboma-cleft_lip_and_palate-intellectual_disability	Sensorineural_hearing_impairment	Strabismus	Glaucoma	Visual_impairment	Ptosis	Cataract	Retinal_detachment	Chorioretinal_coloboma	Microphthalmia	Iris_coloboma	Posterior_embryotoxon	Nystagmus	Optic_atrophy	Hematuria	Intellectual_disability	Bilateral_cleft_lip_and_palate	Corneal_opacity
Cherubism	Abnormality_of_the_dentition	Abnormality_of_the_mandible	Full_cheeks	Visual_impairment	Proptosis	Progressive_visual_loss	Optic_atrophy	Oligodontia	Abnormality_of_the_voice	Upper_airway_obstruction	Obstructive_sleep_apnea	Abnormality_of_dental_morphology	Feeding_difficulties_in_infancy	Bone_cyst	Broad_jaw
Seckel_syndrome	Microcephaly	Narrow_face	Micrognathia	Abnormality_of_earlobe	Absent_earlobe	Convex_nasal_ridge	Downslanted_palpebral_fissures	Glaucoma	Abnormality_of_dental_eNAME	Intellectual_disability	Craniosynostosis	Hip_dysplasia	Intrauterine_growth_retardation	Sandal_gap	Sparse_scalp_hair	Scoliosis	Delayed_skeletal_maturation	Clinodactyly_of_the_5th_finger	Short_stature	Cachexia	Joint_hyperflexibility	Prematurely_aged_appearance	Reduced_number_of_teeth	Cone-shaped_epiphysis	Mild_global_developmental_delay	Cognitive_impairment
Caudal_regression_sequence	Cryptorchidism	Ambiguous_genitalia	Abnormality_of_the_ureter	Ureteral_duplication	Vesicoureteral_reflux	Renal_insufficiency	Ectopic_kidney	Renal_agenesis	Oral_cleft	Hypertension	Missing_ribs	Reduced_tendon_reflexes	Joint_stiffness	Talipes_equinovarus	Anal_atresia	Pulmonary_hypoplasia	Arrhinencephaly	Arnold-Chiari_malformation	Malformation_of_the_heart_and_great_vessels	Bowel_incontinence	Abnormality_of_pelvic_girdle_bone_morphology	Scoliosis	Decreased_muscle_mass	Abnormal_vertebral_segmentation_and_fusion	Hypoplastic_vertebral_bodies	Aplasia/Hypoplasia_of_the_sacrum	Maternal_diabetes	Abnormality_of_the_wing_of_the_ilium	Impulsivity
Werner_syndrome	Hypogonadism	Convex_nasal_ridge	Cataract	Abnormality_of_the_thorax	Osteoporosis	Slender_build	Abnormality_of_the_voice	Sparse_scalp_hair	White_forelock	Premature_graying_of_hair	Pili_torti	Short_stature	Prematurely_aged_appearance	Abnormal_hair_whorl	Lipoatrophy	Abnormal_testis_morphology	Decreased_fertility	Narrow_face	Insulin_resistance	Chondrocalcinosis	Hyperkeratosis	Congestive_heart_failure	Myocardial_infarction	Rocker_bottom_foot	Atherosclerosis	Skeletal_muscle_atrophy	Pulmonary_artery_stenosis	Type_II_diabetes_mellitus	Subcutaneous_calcification	Abnormality_of_retinal_pigmentation	Aplasia/Hypoplasia_of_the_skin	Lipodystrophy	Aplasia/Hypoplasia_of_the_testes	Increased_bone_mineral_density	Telangiectasia_of_the_skin	Lack_of_skin_elasticity	Skin_ulcer	Small_hand	Hypertension	Secondary_amenorrhea	Joint_stiffness	Laryngomalacia	Neoplasm	Gastrointestinal_carcinoma	Meningioma	Squamous_cell_carcinoma	Melanoma	Thyroid_carcinoma	Breast_carcinoma
Waardenburg-Shah_syndrome	Hearing_impairment	Abnormality_of_the_nose	Prominent_nasal_bridge	Underdeveloped_nasal_alae	Wide_nasal_bridge	Abnormality_of_the_eye	Abnormality_of_vision	Telecanthus	Abnormal_eyebrow_morphology	Synophrys	Abnormal_macular_morphology	Olfactory_lobe_agenesis	Constipation	Abdominal_pain	White_forelock	Premature_graying_of_hair	White_eyebrow	White_eyelashes	Abnormal_intestine_morphology	Aganglionic_megacolon	Intestinal_obstruction	Hypopigmentation_of_hair	Abnormality_of_retinal_pigmentation
Familial_progressive_cardiac_conduction_defect	Syncope	Congestive_heart_failure	Abdominal_pain	Dyspnea	Vertigo	Arrhythmia	Bundle_branch_block	Heart_block
Peters_plus_syndrome	Thin_upper_lip_vermilion	Brachycephaly	Long_face	Round_face	Long_philtrum	Micrognathia	Short_neck	Glaucoma	Peters_anomaly	Brachydactyly	Intellectual_disability	Global_developmental_delay	Intrauterine_growth_retardation	Short_foot	Short_toe	Short_columella	Exaggerated_cupid's_bow	Micromelia	Clinodactyly_of_the_5th_finger	Anterior_chamber_synechiae	Corneal_opacity	Disproportionate_short-limb_short_stature	Cryptorchidism	Hypospadias	Cleft_palate	Cleft_upper_lip	Hydrocephalus	Hypertelorism	Preauricular_skin_tag	Webbed_neck	Microcornea	Abnormality_of_vision	Cataract	Upslanted_palpebral_fissure	Nystagmus	Widely_spaced_teeth	Decreased_fetal_movement	Pulmonic_stenosis	Abnormal_cardiac_septum_morphology	Toe_syndactyly	Frontal_bossing	Short_stature	Abnormality_of_the_pulmonary_artery	Preauricular_pit	Microtia_second_degree	Feeding_difficulties_in_infancy	Postnatal_growth_retardation	Prominent_forehead	Short_palpebral_fissure
Van_der_Woude_syndrome	Cleft_palate	Lower_lip_pit	Cleft_upper_lip	Hypodontia	Abnormal_salivary_gland_morphology	Lip_pit
LCAT_deficiency	Hypertriglyceridemia	Decreased_HDL_cholesterol_concentration	Decreased_apolipoprotein_AI_level	Renal_insufficiency	Proteinuria	Hemolytic_anemia	Atherosclerosis	Corneal_opacity	Decreased_glomerular_filtration_rate	Visual_impairment	Acute_kidney_injury	Stage_5_chronic_kidney_disease	Premature_coronary_artery_atherosclerosis
Choroideremia	Abnormality_of_the_eye	Abnormality_of_vision	Visual_impairment	Abnormal_electroretinogram	Progressive_visual_loss	Myopia	Nyctalopia	Abnormality_of_retinal_pigmentation
Neurofibromatosis-Noonan_syndrome	Cryptorchidism	Abnormality_of_the_face	Hypertelorism	Low-set_posteriorly_rotated_ears	Webbed_neck	Downslanted_palpebral_fissures	Ptosis	Abnormality_of_the_thorax	Specific_learning_disability	Hypertrophic_cardiomyopathy	Pulmonic_stenosis	Dysphagia	Prolonged_bleeding_time	Short_stature	Multiple_cafe-au-lait_spots	Abdominal_wall_muscle_weakness	Abnormality_of_the_helix	Abnormality_of_the_lymphatic_system
Liddle_syndrome	Renal_insufficiency	Nephropathy	Hypertension	Muscle_weakness	Constipation	Cerebral_ischemia	Hypokalemia	Arrhythmia	Fatigue
Campomelic_dysplasia	Male_pseudohermaphroditism	Ambiguous_genitalia	Hydronephrosis	Cleft_palate	Macrocephaly	Hypertelorism	Micrognathia	Hearing_impairment	Low-set_ears	Short_neck	Proptosis	Narrow_chest	11_pairs_of_ribs	Laryngomalacia	Talipes_equinovarus	Respiratory_insufficiency	Ventriculomegaly	Malformation_of_the_heart_and_great_vessels	Scoliosis	Recurrent_fractures	Tracheomalacia	Tracheobronchomalacia	Kyphosis	Hip_dislocation	Femoral_bowing	Tibial_bowing	Short_long_bone	Fibular_hypoplasia	Short_stature	Abnormality_of_the_sense_of_smell	Depressed_nasal_bridge	Bowing_of_the_long_bones	Small_abnormally_formed_scapulae	Hypoplasia_of_olfactory_tract	Poorly_ossified_cervical_vertebrae	Hypoplastic_inferior_ilia	Skin_dimple	Flat_face
Nance-Horan_syndrome	Abnormality_of_the_dentition	Long_face	Mandibular_prognathia	Protruding_ear	Prominent_nasal_bridge	Prominent_nose	Microcornea	Strabismus	Glaucoma	Visual_impairment	Cataract	Retinal_detachment	Microphthalmia	Visual_loss	Nystagmus	Behavioral_abnormality	Intellectual_disability	Short_metacarpal	Increased_number_of_teeth
Netherton_syndrome	Ectopic_kidney	Hydronephrosis	Sparse_eyebrow	Sparse_eyelashes	Acanthosis_nigricans	Dry_skin	Eczema	Skin_rash	Erythroderma	Urticaria	Intellectual_disability	Seizures	Global_developmental_delay	Abnormality_of_the_hair	Dehydration	Malabsorption	Emphysema	Asthma	Recurrent_respiratory_infections	Sparse_scalp_hair	Fine_hair	Recurrent_infections	Increased_circulating_total_IgE_level	Aminoaciduria	Decreased_antibody_level_in_blood	Short_stature	Irregular_hyperpigmentation	Congenital_nonbullous_ichthyosiform_erythroderma	Ichthyosis	Trichorrhexis_nodosa	Immunologic_hypersensitivity
Hereditary_sensory_and_autonomic_neuropathy_type_4	Self-mutilation	Anhidrosis	Intellectual_disability	Recurrent_Staphylococcus_aureus_infections	Osteomyelitis	Abnormality_of_peripheral_nerve_conduction	Pain_insensitivity	Impaired_temperature_sensation	Aplasia_of_the_sweat_glands	Dry_skin	Atypical_scarring_of_skin	Specific_learning_disability	Recurrent_fever	Difficulty_walking	Painless_fractures_due_to_injury	Neuropathic_arthropathy	Trophic_limb_changes	Abnormality_of_humoral_immunity	Premature_loss_of_teeth	Nail-biting	Abscess	Abnormality_of_lower_limb_joint	Fasciitis	Lichenification	Short_attention_span	Hyperactivity	Bruising_susceptibility	Syncope	Growth_delay	Anemia	Unexplained_fevers	Dysphagia	Recurrent_aspiration_pneumonia	Abnormality_of_the_autonomic_nervous_system	Distal_sensory_impairment	Abnormality_of_the_ankles	Septic_arthritis	Abnormality_of_the_hip_bone	Sensory_impairment	Functional_motor_deficit	Orthostatic_hypotension_due_to_autonomic_dysfunction	Decreased_corneal_reflex	Alveolar_ridge_overgrowth	Avascular_necrosis	Feeding_difficulties	Tooth_abscess	Tongue_pain	Impulsivity	Abnormality_of_the_lumbar_spine
Non-distal_trisomy_10q	Cryptorchidism	Abnormality_of_the_urinary_system	High_palate	Everted_lower_lip_vermilion	Brachycephaly	Microcephaly	Hypertelorism	Micrognathia	High_forehead	Low-set_posteriorly_rotated_ears	Convex_nasal_ridge	Downslanted_palpebral_fissures	Blepharophimosis	Pectus_excavatum	Frontal_bossing	Malformation_of_the_heart_and_great_vessels	Scoliosis	Abnormality_of_chromosome_segregation	Short_nose	Short_stature	Depressed_nasal_bridge	Joint_hyperflexibility	Aplasia/Hypoplasia_affecting_the_eye	Cognitive_impairment
Trisomy_12p	Abnormality_of_the_urinary_system	Cleft_palate	Everted_lower_lip_vermilion	Turricephaly	Malar_flattening	Epicanthus	Full_cheeks	Hypertelorism	Micrognathia	Low-set_ears	Wide_nasal_bridge	Short_neck	Thickened_nuchal_skin_fold	Proptosis	Thick_eyebrow	Large_hands	Intellectual_disability	Global_developmental_delay	Anal_atresia	Supernumerary_nipple	Malformation_of_the_heart_and_great_vessels	Downturned_corners_of_mouth	Delayed_skeletal_maturation	Abnormality_of_chromosome_segregation	Short_nose	Clinodactyly_of_the_5th_finger	Short_stature	Aplasia/Hypoplasia_of_the_iris	Aplasia/Hypoplasia_affecting_the_eye	Abnormality_of_the_antihelix	Flat_face
3q13_microdeletion_syndrome	Cryptorchidism	Abnormality_of_the_urinary_system	Abnormality_of_the_fontanelles_or_cranial_sutures	Macrocephaly	Epicanthus	Hypertelorism	Long_philtrum	Wide_nasal_bridge	Anteverted_nares	Short_neck	Narrow_chest	Abnormality_of_the_hand	Muscular_hypotonia	Agenesis_of_corpus_callosum	Joint_stiffness	Wide_intermamillary_distance	Hypoplasia_of_penis
Xp22.3_microdeletion_syndrome	Hypogonadotrophic_hypogonadism	Decreased_fertility	Polycystic_ovaries	Myopia	Secondary_amenorrhea	Sacral_dimple	Abnormality_of_chromosome_segregation	Short_stature	Ectopic_anus	Opacification_of_the_corneal_stroma	Aplasia/Hypoplasia_affecting_the_eye	Aplasia/Hypoplasia_of_the_skin
Distal_monosomy_17q	Narrow_mouth	Microcephaly	Abnormality_of_the_philtrum	Hypertelorism	Low-set_posteriorly_rotated_ears	Upslanted_palpebral_fissure	Optic_atrophy	Melanocytic_nevus	Abnormality_of_the_metacarpal_bones	Abnormal_thumb_morphology	Premature_birth	Abnormality_of_the_cardiovascular_system	Patent_ductus_arteriosus	Abnormal_cardiac_septum_morphology	Respiratory_insufficiency	Hepatomegaly	Micromelia	Abnormality_of_the_hip_bone	Abnormal_form_of_the_vertebral_bodies	Deviation_of_finger	Short_stature	Prominent_metopic_ridge	Abnormal_dermatoglyphics	Bilateral_single_transverse_palmar_creases	Microtia	Aplasia/Hypoplasia_of_the_thumb	Aplasia/Hypoplasia_of_the_uvula	Short_thorax	Asymmetric_growth	Upper_limb_asymmetry	Small_hand
Distal_monosomy_3p	Inguinal_hernia	Cryptorchidism	Cleft_palate	High_palate	Thin_vermilion_border	Brachycephaly	Microcephaly	Epicanthus	Hypertelorism	Triangular_face	Long_philtrum	Micrognathia	Hearing_impairment	Low-set_posteriorly_rotated_ears	Anteverted_nares	Short_neck	Telecanthus	Ptosis	Blepharophimosis	Sacral_dimple	Postaxial_hand_polydactyly	Seizures	Muscular_hypotonia	Spasticity	Intrauterine_growth_retardation	Umbilical_hernia	Ventriculomegaly	Downturned_corners_of_mouth	Clinodactyly_of_the_5th_finger	Short_stature	Preauricular_pit	Atrioventricular_canal_defect	Abnormal_vestibulo-ocular_reflex	Cognitive_impairment
Monosomy_13q14	Trigonocephaly	Microcephaly	Epicanthus	Hypertelorism	Micrognathia	Low-set_ears	Thickened_helices	Protruding_ear	Prominent_nasal_bridge	Wide_nasal_bridge	Webbed_neck	Short_neck	Ptosis	Cataract	Microphthalmia	Iris_coloboma	Brachydactyly	Intellectual_disability	Muscular_hypotonia	Holoprosencephaly	Intrauterine_growth_retardation	Hypoplasia_of_the_corpus_callosum	Malformation_of_the_heart_and_great_vessels	Clinodactyly_of_the_5th_finger	Short_stature	Finger_syndactyly	Abnormal_dermatoglyphics	Aplasia/Hypoplasia_of_the_thumb	Retinoblastoma	Abnormality_of_the_gastrointestinal_tract
Distal_monosomy_13q	Ambiguous_genitalia	Microcephaly	Hypertelorism	Iris_coloboma	Optic_atrophy	Abnormality_of_the_hand	Abnormality_of_the_metacarpal_bones	Hypertonia	Holoprosencephaly	Abnormal_cardiac_septum_morphology	Anal_atresia	Encephalocele	Anencephaly	Abnormal_form_of_the_vertebral_bodies	Short_stature	Aplasia/Hypoplasia_of_the_corpus_callosum	Aplasia/Hypoplasia_affecting_the_eye	Primary_adrenal_insufficiency	Renal_hypoplasia/aplasia	Aplasia/Hypoplasia_of_the_thumb	Cognitive_impairment	Urogenital_fistula
Distal_monosomy_10p	Cryptorchidism	Polycystic_ovaries	Cleft_palate	Microcephaly	Hypertelorism	Micrognathia	Hearing_abnormality	Hearing_impairment	Low-set_posteriorly_rotated_ears	Macrotia	Wide_nasal_bridge	Convex_nasal_ridge	Webbed_neck	Short_neck	Strabismus	Downslanted_palpebral_fissures	Abnormal_fingernail_morphology	Intellectual_disability	Joint_stiffness	Intrauterine_growth_retardation	Hypoplastic_toenails	Anal_atresia	Malformation_of_the_heart_and_great_vessels	Clinodactyly_of_the_5th_finger	Short_stature	Ectopic_anus	Bilateral_single_transverse_palmar_creases	Hypoplasia_of_penis	Abnormality_of_the_elbow	Severe_global_developmental_delay	Non-midline_cleft_lip
Non-distal_monosomy_10q	Epicanthus	Wide_nasal_bridge	Strabismus	Ptosis	Upslanted_palpebral_fissure	Synophrys	Brachydactyly	Ataxia	Muscular_hypotonia	Gait_disturbance	Clinodactyly_of_the_5th_finger	Biparietal_narrowing	Bilateral_single_transverse_palmar_creases	Overlapping_fingers	Cognitive_impairment
Ring_chromosome_8_syndrome	Abnormality_of_the_ureter	Hydronephrosis	Abnormal_palate_morphology	Epicanthus	Sloping_forehead	High_forehead	Anteverted_nares	Intellectual_disability	Polyhydramnios	Frontal_bossing	Low_posterior_hairline	Short_nose	Deviation_of_finger	Round_ear
Currarino_syndrome	Aplasia/Hypoplasia_of_the_sacrum	Sacrococcygeal_teratoma	Male_pseudohermaphroditism	Hypospadias	Bifid_scrotum	Vesicoureteral_reflux	Abnormal_intestine_morphology	Hypoplasia_of_penis	Arteriovenous_malformation	Lower_limb_asymmetry
Ring_chromosome_4_syndrome	Split_hand	Abnormality_of_the_upper_limb	Abnormality_of_the_ulna	Aplasia/Hypoplasia_of_the_radius
Ring_chromosome_6_syndrome	Microcephaly	Epicanthus	Hypertelorism	Macrotia	Wide_nasal_bridge	Short_neck	Respiratory_insufficiency	Low_posterior_hairline	Short_stature	Short_distal_phalanx_of_finger	Urogenital_fistula
Ring_chromosome_1_syndrome	Microcephaly	Round_face	Long_philtrum	Wide_nasal_bridge	Anteverted_nares	Downslanted_palpebral_fissures	Telecanthus	Ptosis	Downturned_corners_of_mouth	Clinodactyly_of_the_5th_finger	Feeding_difficulties_in_infancy	Abnormal_hair_pattern	Cognitive_impairment
Ring_chromosome_10_syndrome	Thin_vermilion_border	Hypertelorism	Long_philtrum	Micrognathia	Low-set_ears	Wide_nasal_bridge	Short_neck	Downslanted_palpebral_fissures	Microphthalmia	Pectus_excavatum	Tapered_finger	Intellectual_disability	Seizures	Muscular_hypotonia	Intrauterine_growth_retardation	Sandal_gap	Frontal_bossing	Aganglionic_megacolon	Hypocalcemia	Cachexia	Wide_intermamillary_distance	Renal_hypoplasia/aplasia	Abnormality_of_the_antihelix	Large_earlobe
Progressive_familial_intrahepatic_cholestasis	Jaundice	Cholestasis	Failure_to_thrive	Splenomegaly	Abnormality_of_thrombocytes	Abnormality_of_coagulation	Malabsorption	Hepatomegaly	Neoplasm	Delayed_skeletal_maturation	Hypocalcemia	Short_stature	Reduced_bone_mineral_density	Cognitive_impairment
Carey-Fineman-Ziter_syndrome	Hydronephrosis	Glossoptosis	Cleft_palate	Pierre-Robin_sequence	High_palate	Thin_vermilion_border	Microcephaly	Epicanthus	Long_philtrum	Micrognathia	Anteverted_nares	Downslanted_palpebral_fissures	Ptosis	Impaired_ocular_abduction	Glandular_hypospadias	Brachydactyly	Intellectual_disability	Muscular_hypotonia	Growth_delay	Abnormality_of_the_larynx	Laryngeal_stenosis	Talipes_equinovarus	Ventriculomegaly	Cerebral_calcification	Scoliosis	Short_nose	Myopathy	Skeletal_muscle_atrophy	Short_stature	Cranial_nerve_paralysis	Aplasia/Hypoplasia_of_the_cerebellum	Ulnar_deviation_of_finger	Aplasia_of_the_pectoralis_major_muscle	Aplasia/Hypoplasia_of_the_tongue	Facial_palsy	Hypertensive_crisis
Heart_defects-limb_shortening_syndrome	Abnormality_of_the_ribs	Narrow_chest	Abnormality_of_the_metaphysis	Death_in_infancy	Ventricular_septal_defect	Atrial_septal_defect	Abnormal_mitral_valve_morphology	Abnormal_tricuspid_valve_morphology	Kyphosis	Abnormal_form_of_the_vertebral_bodies	Disproportionate_short_stature	Abnormality_of_the_pulmonary_artery	Mesomelic/rhizomelic_limb_shortening	Accelerated_skeletal_maturation
C_syndrome	Multicystic_kidney_dysplasia	Cryptorchidism	Horseshoe_kidney	Cleft_palate	Accessory_oral_frenulum	Gingival_overgrowth	High_palate	Thin_vermilion_border	Trigonocephaly	Microcephaly	Epicanthus	Smooth_philtrum	Long_philtrum	Micrognathia	Low-set_posteriorly_rotated_ears	Anteverted_nares	Short_neck	Strabismus	Upslanted_palpebral_fissure	Pectus_excavatum	Congenital_diaphragmatic_hernia	Sacral_dimple	Hand_polydactyly	Intellectual_disability	Seizures	Muscular_hypotonia	Joint_dislocation	Limitation_of_joint_mobility	Death_in_infancy	Failure_to_thrive_in_infancy	Omphalocele	Polyhydramnios	Redundant_skin	Toe_syndactyly	Talipes	Constipation	Malformation_of_the_heart_and_great_vessels	Micromelia	Dislocated_radial_head	Short_nose	Clinodactyly_of_the_5th_finger	Short_stature	Abnormality_of_the_anus	Biparietal_narrowing	Depressed_nasal_bridge	Aplasia/Hypoplasia_of_the_corpus_callosum	Bilateral_single_transverse_palmar_creases	Midline_facial_capillary_hemangioma	Renal_hypoplasia/aplasia
Barth_syndrome	Dilated_cardiomyopathy	Endocardial_fibroelastosis	Abnormality_of_neutrophils	Abnormal_mitochondrial_morphology
48_XXYY_syndrome	Inguinal_hernia	Azoospermia	Cryptorchidism	Tall_stature	Cleft_palate	Thick_lower_lip_vermilion	Long_face	Epicanthus	Hypertelorism	Facial_asymmetry	Chronic_otitis_media	Strabismus	Blepharophimosis	Upslanted_palpebral_fissure	Nystagmus	Carious_teeth	Taurodontia	Abnormality_of_dental_eNAME	Delayed_eruption_of_teeth	Psychosis	Depressivity	Autism	Stereotypy	Anxiety	Gynecomastia	Infertility	Hypergonadotropic_hypogonadism	Intellectual_disability	Seizures	Ataxia	Muscular_hypotonia	Dysarthria	Global_developmental_delay	Tremor	Hip_dysplasia	Obesity	Pes_planus	Talipes	Constipation	Gastroesophageal_reflux	Asthma	Apnea	Ventriculomegaly	Neurological_speech_impairment	Recurrent_respiratory_infections	Malformation_of_the_heart_and_great_vessels	Scoliosis	Lymphoma	Radioulnar_synostosis
Fraser_syndrome	Multicystic_kidney_dysplasia	Cryptorchidism	Scrotal_hypoplasia	Hypospadias	Ambiguous_genitalia	Urethral_atresia	Renal_hypoplasia	Abnormality_of_the_vagina	Vaginal_atresia	Oral_cleft	Cleft_upper_lip	High_palate	Microcephaly	Hypertelorism	Low-set_posteriorly_rotated_ears	Abnormality_of_the_middle_ear	Conductive_hearing_impairment	Atresia_of_the_external_auditory_canal	Underdeveloped_nasal_alae	Wide_nasal_bridge	Anophthalmia	Microphthalmia	Blindness	Dental_crowding	Dental_malocclusion	Bicornuate_uterus	Cryptophthalmos	Intellectual_disability	Skull_defect	Death_in_infancy	Umbilical_hernia	Omphalocele	Laryngeal_stenosis	Subglottic_stenosis	Toe_syndactyly	Anal_atresia	Anal_stenosis	Encephalocele	Pulmonary_hypoplasia	Abnormal_lung_lobation	Myelomeningocele	Malformation_of_the_heart_and_great_vessels	Tracheal_stenosis	Wide_pubic_symphysis	Cleft_ala_nasi	Vertebral_segmentation_defect	Midline_nasal_groove	Ectopic_anus	Depressed_nasal_bridge
46_XY_complete_gonadal_dysgenesis	Male_pseudohermaphroditism	Hypogonadotrophic_hypogonadism	Polycystic_ovaries	Testicular_dysgenesis
L√©ri-Weill_dyschondrosteosis	Wide_nasal_bridge	Abnormality_of_the_metaphysis	Brachydactyly	Abnormality_of_the_carpal_bones	Joint_stiffness	Hypoplastic_fingernail	Abnormality_of_pelvic_girdle_bone_morphology	Abnormality_of_calvarial_morphology	Abnormality_of_the_radius	Abnormality_of_femur_morphology	Genu_valgum	Genu_varum	Tibial_bowing	Micromelia	Hypoplasia_of_the_radius	Radial_bowing	Abnormality_of_tibia_morphology	Abnormality_of_the_ulna	Hypoplasia_of_the_ulna	Mesomelia	Ulnar_bowing	Elbow_dislocation	Abnormality_of_the_humerus	Madelung_deformity	Abnormality_of_the_hip_bone	Clinodactyly_of_the_5th_finger	Diaphyseal_thickening	Depressed_nasal_bridge	Short_tibia	Abnormality_of_epiphysis_morphology	Limited_wrist_movement	Patellar_aplasia	Dorsal_subluxation_of_ulna	Disproportionate_short-limb_short_stature	Cone-shaped_epiphysis	Aplastic/hypoplastic_toenail	Exostoses
Autosomal_recessive_spondylocostal_dysostosis	Abnormal_morphology_of_female_internal_genitalia	Inguinal_hernia	Cryptorchidism	Hypospadias	Abnormality_of_the_ureter	Cleft_palate	Microcephaly	Macrocephaly	Prominent_occiput	Broad_forehead	Long_philtrum	Low-set_posteriorly_rotated_ears	Anteverted_nares	Short_neck	Abnormality_of_the_ribs	Congenital_diaphragmatic_hernia	Rib_fusion	Intellectual_disability	Intrauterine_growth_retardation	Umbilical_hernia	Respiratory_insufficiency	Meningocele	Malformation_of_the_heart_and_great_vessels	Scoliosis	Kyphosis	Spina_bifida_occulta	Abnormal_form_of_the_vertebral_bodies	Vertebral_segmentation_defect	Short_stature	Abnormality_of_the_intervertebral_disk	Depressed_nasal_bridge	Finger_syndactyly	Rib_segmentation_abnormalities	Short_thorax	Anomalous_pulmonary_venous_return	Abnormality_of_immune_system_physiology	Camptodactyly_of_finger	Urogenital_fistula
Duane_retraction_syndrome	Ectopic_kidney	Cleft_palate	Everted_lower_lip_vermilion	Microcephaly	Facial_asymmetry	Micrognathia	Hearing_impairment	Preauricular_skin_tag	Stenosis_of_the_external_auditory_canal	Sensorineural_hearing_impairment	Wide_nasal_bridge	Anteverted_nares	Webbed_neck	Short_neck	Microcornea	Strabismus	Deeply_set_eye	Abnormality_of_eye_movement	Ptosis	Aniridia	Chorioretinal_coloboma	Blepharophimosis	Iris_coloboma	Abnormal_pupil_morphology	Nystagmus	Blepharospasm	Amblyopia	Hypopigmented_skin_patches	Brachydactyly	Preaxial_hand_polydactyly	Triphalangeal_thumb	Seizures	Global_developmental_delay	Plagiocephaly	Talipes_equinovarus	Low_posterior_hairline	Malformation_of_the_heart_and_great_vessels	Hypoplasia_of_the_radius	Skeletal_muscle_atrophy	Spina_bifida_occulta	Abnormal_form_of_the_vertebral_bodies	Absent_radius	Abnormal_vertebral_segmentation_and_fusion	Irregular_hyperpigmentation	Optic_disc_hypoplasia	Central_heterochromia	Hypoplastic_iris_stroma	External_ear_malformation	Aplasia/Hypoplasia_of_the_thumb
Noonan_syndrome_with_multiple_lentigines	Cryptorchidism	Hypospadias	Abnormality_of_the_genital_system	Decreased_fertility	Brachycephaly	Abnormality_of_the_face	Hypertelorism	Triangular_face	Low-set_posteriorly_rotated_ears	Sensorineural_hearing_impairment	Wide_nasal_bridge	Webbed_neck	Ptosis	Pectus_excavatum	Pectus_carinatum	Sprengel_anomaly	Hyperextensible_skin	Melanocytic_nevus	Multiple_lentigines	Intellectual_disability_mild	Global_developmental_delay	Freckling	Subcutaneous_nodule	Growth_delay	Intrauterine_growth_retardation	Abnormality_of_the_voice	Abnormal_mitral_valve_morphology	Mitral_valve_prolapse	Hypertrophic_cardiomyopathy	Abnormal_pulmonary_valve_morphology	Pulmonic_stenosis	Myocardial_infarction	Malformation_of_the_heart_and_great_vessels	Dilatation	Scoliosis	Melanoma	Myelodysplasia	Neuroblastoma	Spina_bifida_occulta	Scapular_winging	Abnormality_of_the_endocardium	Short_stature	Abnormality_of_the_pulmonary_artery	Atrioventricular_canal_defect	Excessive_wrinkled_skin	Severe_sensorineural_hearing_impairment	Aplasia/Hypoplasia_of_the_abdominal_wall_musculature	Arrhythmia	Bundle_branch_block
Mosaic_trisomy_15	Abnormality_of_the_nervous_system	Abnormality_of_the_hand	Muscular_hypotonia	Abnormality_of_chromosome_segregation	Deviation_of_finger	Camptodactyly_of_finger
3C_syndrome	Inguinal_hernia	Hypospadias	Hydronephrosis	Cleft_palate	Oral_cleft	Abnormality_of_the_fontanelles_or_cranial_sutures	Hydrocephalus	Macrocephaly	Prominent_occiput	Hypertelorism	Facial_hemangioma	Micrognathia	Low-set_ears	Preauricular_skin_tag	Wide_nasal_bridge	Short_neck	Downslanted_palpebral_fissures	Glaucoma	Chorioretinal_coloboma	Iris_coloboma	Optic_atrophy	Adrenal_hypoplasia	Missing_ribs	Brachydactyly	Hand_polydactyly	Single_umbilical_artery	Intellectual_disability	Muscular_hypotonia	Global_developmental_delay	Dandy-Walker_malformation	Death_in_infancy	Ventricular_septal_defect	Atrial_septal_defect	Abnormal_mitral_valve_morphology	Tetralogy_of_Fallot	Pulmonic_stenosis	Aortic_valve_stenosis	Abnormal_tricuspid_valve_morphology	Hypoplastic_fingernail	Frontal_bossing	Gastroesophageal_reflux	Anal_atresia	Ventriculomegaly	Neurological_speech_impairment	Recurrent_respiratory_infections	Abnormality_of_neuronal_migration	Intestinal_malrotation	Scoliosis	High_narrow_palate
Aase-Smith_syndrome	Cleft_palate	Trismus	Abnormality_of_the_pinna	Strabismus	Slender_finger	Dandy-Walker_malformation	Joint_stiffness	Talipes_equinovarus	Scoliosis	Neoplasm	Multiple_joint_contractures	Abnormality_of_the_hip_bone	Aplasia/Hypoplasia_of_the_radius	Camptodactyly_of_finger
Ablepharon_macrostomia_syndrome	Abnormality_of_female_external_genitalia	Ambiguous_genitalia	Wide_mouth	Thin_vermilion_border	Hypoplasia_of_the_maxilla	Hearing_impairment	Atresia_of_the_external_auditory_canal	Underdeveloped_nasal_alae	Anteverted_nares	Visual_impairment	Myopia	Absent_eyelashes	Microdontia	Delayed_speech_and_language_development	Dry_skin	Thin_skin	Abnormality_of_skin_pigmentation	Cryptophthalmos	Global_developmental_delay	Growth_delay	Umbilical_hernia	Omphalocele	Redundant_skin	Toe_syndactyly	Fine_hair	Absent_eyebrow	Breast_hypoplasia	Depressed_nasal_bridge	Aplasia/Hypoplasia_of_the_nipples	Excessive_wrinkled_skin	Corneal_opacity	Sparse_hair	Microtia	Hypoplasia_of_penis	Hypoplasia_of_the_zygomatic_bone	Abnormal_hair_pattern	Ablepharon	Camptodactyly_of_finger	Corneal_erosion
Spina_bifida-hypospadias_syndrome	Hypospadias	Spina_bifida	Spinal_dysraphism
Tetraploidy	Hydronephrosis	Cleft_palate	Microcephaly	Short_philtrum	Micrognathia	Preauricular_skin_tag	Convex_nasal_ridge	Intrauterine_growth_retardation	Arnold-Chiari_malformation	Abnormality_of_chromosome_segregation	Radial_club_hand	Biparietal_narrowing	Aplasia/Hypoplasia_of_the_lungs	Aplasia/Hypoplasia_affecting_the_eye	Renal_hypoplasia/aplasia	Aplasia/Hypoplasia_of_the_thymus	Hypoplasia_of_the_ear_cartilage
Trisomy_X	Multicystic_kidney_dysplasia	Tall_stature	Epicanthus	Hypertelorism	Upslanted_palpebral_fissure	Depressivity	Anxiety	Pectus_excavatum	Secondary_amenorrhea	Seizures	Muscular_hypotonia	Global_developmental_delay	Specific_learning_disability	Tremor	Hip_dysplasia	Abnormality_of_chromosome_segregation	Clinodactyly_of_the_5th_finger	Joint_hyperflexibility	Attention_deficit_hyperactivity_disorder	Renal_hypoplasia/aplasia	Cognitive_impairment
Triploidy	Cryptorchidism	Hypospadias	Ambiguous_genitalia	Wide_mouth	Macroglossia	Narrow_mouth	Cleft_palate	Abnormality_of_the_fontanelles_or_cranial_sutures	Hydrocephalus	Macrocephaly	Hypertelorism	Micrognathia	Low-set_posteriorly_rotated_ears	Short_neck	Cataract	Iris_coloboma	Narrow_chest	Holoprosencephaly	Intrauterine_growth_retardation	Omphalocele	Polyhydramnios	Abnormal_cardiac_septum_morphology	Abnormality_of_the_pancreas	Hepatomegaly	Meningocele	Intestinal_malrotation	Abnormality_of_chromosome_segregation	Decreased_skull_ossification	Abnormality_of_the_gallbladder	Finger_syndactyly	Aplasia/Hypoplasia_of_the_corpus_callosum	Aplasia/Hypoplasia_affecting_the_eye	Hypoplasia_of_penis	Non-midline_cleft_lip
Familial_multiple_nevi_flammei	Glaucoma	Edema	Hypermelanotic_macule	Nevus_flammeus	Intellectual_disability	Seizures	Hemiparesis	Abnormal_cranial_nerve_morphology	Intracranial_hemorrhage	Pulmonary_embolism	Hemiplegia	Cerebral_calcification	Scoliosis	Abnormality_of_the_lower_limb	Abnormality_of_the_upper_limb	Venous_thrombosis	Venous_insufficiency	Irregular_hyperpigmentation	Arrhythmia	Arteriovenous_malformation	Lower_limb_asymmetry	Papule	Skin_ulcer
Familial_male-limited_precocious_puberty	Long_penis	Macroorchidism	Tall_stature	Behavioral_abnormality	Oligospermia	Precocious_puberty	Acne	Abnormality_of_the_hair	Male_infertility	Accelerated_skeletal_maturation	Attention_deficit_hyperactivity_disorder
Familial_visceral_myopathy	Megacystis	Hydroureter	Vesicoureteral_reflux	Cleft_palate	Microcephaly	Round_face	Broad_forehead	Micrognathia	Low-set_posteriorly_rotated_ears	Prominent_nasal_bridge	Anteverted_nares	Narrow_chest	Hyperparathyroidism	Arachnodactyly	Joint_stiffness	Umbilical_hernia	Anonychia	Aganglionic_megacolon	Malformation_of_the_heart_and_great_vessels	Abdominal_distention	Abdominal_situs_inversus	Aplasia/Hypoplasia_of_the_abdominal_wall_musculature	Camptodactyly_of_finger
Mitochondrial_myopathy-lactic_acidosis-deafness_syndrome	Sensorineural_hearing_impairment	Seizures	Metabolic_acidosis	Myopathy	Skeletal_muscle_atrophy	Hyperalaninemia	EMG_abnormality	Mitochondrial_myopathy	Vaginal_fistula
Mitochondrial_myopathy_and_sideroblastic_anemia	High_palate	Microcephaly	Long_philtrum	Micrognathia	Glaucoma	Delayed_puberty	Intellectual_disability	Muscular_hypotonia	Anemia	Abnormality_of_metabolism/homeostasis	Scoliosis	Kyphosis	Lactic_acidosis	Short_nose	Myopathy	EMG_abnormality	Mitochondrial_myopathy	Generalized_limb_muscle_atrophy	Distichiasis
Carnitine_palmitoyl_transferase_1A_deficiency	Behavioral_abnormality	Seizures	Muscular_hypotonia	Lethargy	Coma	Reduced_tendon_reflexes	Hepatic_failure	Hypertrophic_cardiomyopathy	Sudden_cardiac_death	Abnormality_of_metabolism/homeostasis	Hypoglycemia	Renal_tubular_acidosis	Neurological_speech_impairment	Hepatomegaly	Elevated_hepatic_transaminase	Skeletal_muscle_atrophy	Hemiplegia/hemiparesis	Loss_of_consciousness	Transient_hyperlipidemia	Arrhythmia	Fatigue
Epilepsy-microcephaly-skeletal_dysplasia_syndrome	Microcephaly	Hirsutism	Intellectual_disability	Seizures	Coarse_facial_features	Scoliosis	Delayed_skeletal_maturation
Amelocerebrohypohidrotic_syndrome	Hydrocephalus	Hypohidrosis	Seizures	Spasticity	Mental_deterioration	EEG_abnormality	Developmental_regression	Short_stature	Yellow-brown_discoloration_of_the_teeth	Abnormality_of_dental_color	Abnormality_of_dental_eNAME	Amelogenesis_imperfecta	Dementia	Intellectual_disability_severe
Griscelli_syndrome	Hydrocephalus	Abnormal_eyelash_morphology	Abnormal_eyebrow_morphology	Nystagmus	Jaundice	Hypopigmented_skin_patches	Intellectual_disability	Seizures	Ataxia	Muscular_hypotonia	Spasticity	Global_developmental_delay	Reduced_tendon_reflexes	Ascites	Splenomegaly	Thrombocytopenia	Abnormality_of_neutrophils	Leukopenia	Fever	Pyloric_stenosis	Encephalocele	Premature_graying_of_hair	Silver-gray_hair	Hepatomegaly	Lymphadenopathy	Immunodeficiency	Abnormal_circulating_lipid_concentration	Decreased_antibody_level_in_blood	Short_stature	Bone_marrow_hypocellularity	Cranial_nerve_paralysis	Iris_hypopigmentation	Pedal_edema	White_hair	Hepatitis	Abnormality_of_movement
Epilepsy-telangiectasia_syndrome	Abnormality_of_the_dentition	Long_philtrum	Anteverted_nares	Conjunctival_telangiectasia	Intellectual_disability	Seizures	Decreased_circulating_IgA_level	Decreased_antibody_level_in_blood	Short_stature	Short_5th_finger
Oculogastrointestinal_muscular_dystrophy	Abnormal_mitral_valve_morphology	Malabsorption	Gastroparesis	Myopathy	Skeletal_muscle_atrophy	Abdominal_distention	Cachexia	Intestinal_pseudo-obstruction	Abnormality_of_the_gastrointestinal_tract	Ptosis	External_ophthalmoplegia	Abnormality_of_the_gastric_mucosa	Spontaneous_esophageal_perforation
Proximal_Xq28_duplication_syndrome	Cryptorchidism	Hypospadias	Ptosis	Pectus_excavatum	Gait_disturbance	Joint_stiffness	Neurological_speech_impairment	Delayed_skeletal_maturation	Abnormality_of_chromosome_segregation	Hernia_of_the_abdominal_wall	Short_stature	Intellectual_disability_severe	Everted_lower_lip_vermilion	Epicanthus	Blepharophimosis	Global_developmental_delay	Tented_upper_lip_vermilion	Severe_global_developmental_delay
TRIM32-related	Tall_stature	Mask-like_facies	Gait_disturbance	Waddling_gait	Myopathy	Elevated_serum_creatine_kinase	EMG_abnormality	Increased_variability_in_muscle_fiber_diameter	Proximal_muscle_weakness_in_lower_limbs
Trisomy_5p	Macrocephaly	Dolichocephaly	Round_face	Hypertelorism	Protruding_ear	Ptosis	Abnormality_of_the_metacarpal_bones	Obesity	Frontal_bossing	Ventriculomegaly	Developmental_regression	Scoliosis	Abnormality_of_chromosome_segregation	Short_stature	Renal_hypoplasia/aplasia	Hypoplasia_of_penis	Intellectual_disability_severe
Trisomy_4p	Cryptorchidism	Hypospadias	Abnormality_of_the_dentition	Abnormal_palate_morphology	Microcephaly	Low_anterior_hairline	Round_face	Hypertelorism	Smooth_philtrum	Low-set_posteriorly_rotated_ears	Macrotia	Short_neck	Strabismus	Thick_eyebrow	Blepharophimosis	Carious_teeth	Preaxial_hand_polydactyly	Muscular_hypotonia	Malformation_of_the_heart_and_great_vessels	Scoliosis	Delayed_skeletal_maturation	Abnormality_of_chromosome_segregation	Radial_club_hand	Short_stature	Depressed_nasal_bridge	Wide_intermamillary_distance	Abnormality_of_the_antihelix	Abnormal_hair_pattern	Camptodactyly_of_finger	Cognitive_impairment
Trisomy_8q	Cryptorchidism	Cleft_palate	Abnormal_oral_frenulum_morphology	Oral_cleft	High_palate	Everted_lower_lip_vermilion	Hypertelorism	Micrognathia	High_forehead	Low-set_posteriorly_rotated_ears	Protruding_ear	Wide_nasal_bridge	Short_neck	Upslanted_palpebral_fissure	Brachydactyly	Global_developmental_delay	Specific_learning_disability	Joint_stiffness	Myelomeningocele	Malformation_of_the_heart_and_great_vessels	Abnormality_of_chromosome_segregation	Deep_palmar_crease	Hypoplasia_of_penis	Chin_dimple	Non-midline_cleft_lip	Camptodactyly_of_finger	Displacement_of_the_urethral_meatus	Long_thorax	Bifid_tongue	Bone_cyst
Distal_trisomy_6p	Abnormality_of_the_urinary_system	Renal_hypoplasia	Hydronephrosis	Narrow_mouth	Thin_vermilion_border	Pointed_chin	Micrognathia	Low-set_ears	Prominent_nasal_bridge	Short_neck	Strabismus	Abnormal_eyelash_morphology	Ptosis	Cataract	Blepharophimosis	Nystagmus	Dry_skin	Sacral_dimple	Global_developmental_delay	Intrauterine_growth_retardation	Frontal_bossing	Abnormal_lung_lobation	Fine_hair	Malformation_of_the_heart_and_great_vessels	Abnormality_of_chromosome_segregation	Short_stature	Wide_intermamillary_distance	Aplasia/Hypoplasia_affecting_the_eye	Abnormality_of_the_antitragus	Aplasia/Hypoplasia_of_the_earlobes	Abnormal_hair_quantity	Hernia	Long_thorax
Mosaic_trisomy_14	Cryptorchidism	Hypospadias	Wide_mouth	Cleft_palate	High_palate	Hypertelorism	Micrognathia	Low-set_posteriorly_rotated_ears	Prominent_nasal_bridge	Wide_nasal_bridge	Anteverted_nares	Short_neck	Ptosis	Blepharophimosis	Abnormality_of_the_ribs	Narrow_chest	Intellectual_disability	Seizures	Global_developmental_delay	Failure_to_thrive	Frontal_bossing	Malformation_of_the_heart_and_great_vessels	Abnormality_of_chromosome_segregation	Ectopic_anus	Bilateral_single_transverse_palmar_creases	Aplasia/Hypoplasia_affecting_the_eye	Microtia	Hypoplasia_of_penis	Camptodactyly_of_finger	Lower_limb_asymmetry
Non-distal_trisomy_13q	Cryptorchidism	Abnormality_of_the_dentition	High_palate	Everted_lower_lip_vermilion	Thin_vermilion_border	Trigonocephaly	Microcephaly	Long_philtrum	Micrognathia	Abnormal_eyelash_morphology	Thick_eyebrow	Hypotelorism	Synophrys	Narrow_chest	Hemangioma	Postaxial_hand_polydactyly	Arachnodactyly	Abnormal_fingernail_morphology	Hypoplastic_toenails	Abnormality_of_chromosome_segregation	Short_nose	Wide_intermamillary_distance	Aplasia/Hypoplasia_affecting_the_eye	Abnormality_of_the_antihelix	Aplasia/Hypoplasia_of_the_earlobes	Cognitive_impairment	Hernia
17p11.2_microduplication_syndrome	Wide_mouth	Microcephaly	Hypertelorism	Triangular_face	Broad_forehead	Micrognathia	Hearing_impairment	Low-set_posteriorly_rotated_ears	Downslanted_palpebral_fissures	Abnormality_of_the_pharynx	Autism	Anxiety	Muscular_hypotonia	Intellectual_disability_mild	Dysarthria	Global_developmental_delay	Failure_to_thrive	Gastroesophageal_reflux	Hypoplasia_of_the_corpus_callosum	EEG_abnormality	Dysphasia	Expressive_language_delay	Malformation_of_the_heart_and_great_vessels	Scoliosis	Abnormality_of_chromosome_segregation	Short_stature	Abnormality_of_dental_morphology	Poor_fine_motor_coordination	Attention_deficit_hyperactivity_disorder	High_hypermetropia	Echolalia	Sleep_apnea	Open_bite	Speech_apraxia	Oral-pharyngeal_dysphagia
Distal_trisomy_14q	Hearing_impairment	Glaucoma	Patent_ductus_arteriosus	Abnormal_aortic_morphology	Abnormal_lung_lobation	Abnormality_of_chromosome_segregation	Short_stature	Aplasia/Hypoplasia_of_the_corpus_callosum	Abnormality_of_the_upper_urinary_tract	Cognitive_impairment
PAGOD_syndrome	Multicystic_kidney_dysplasia	Abnormal_morphology_of_female_internal_genitalia	Abnormal_testis_morphology	Ambiguous_genitalia	Abnormality_of_the_uterus	Microcephaly	Optic_atrophy	Abnormality_of_the_ribs	Congenital_diaphragmatic_hernia	Abnormality_of_the_clavicle	Death_in_infancy	Omphalocele	Sudden_cardiac_death	Abnormal_aortic_morphology	Situs_inversus_totalis	Abnormality_of_the_spleen	Encephalocele	Pulmonary_hypoplasia	Abnormality_of_neuronal_migration	Spina_bifida	Meningocele	Malformation_of_the_heart_and_great_vessels	Short_stature	Hypoplastic_left_heart	Abnormality_of_the_pulmonary_artery	Pulmonary_artery_hypoplasia	Absent_gonadal_tissue	Renal_hypoplasia/aplasia	Female_pseudohermaphroditism	Arrhythmia	Asymmetric_growth
Aicardi-Gouti√®res_syndrome	Increased_CSF_interferon_alpha	Chilblain_lesions	Brain_atrophy	Increased_serum_interferon-gamma_level	Micropenis	Low-set_ears	Abnormality_of_eye_movement	Glaucoma	Ptosis	Nystagmus	Diabetes_mellitus	Hypothyroidism	Cutis_marmorata	Acrocyanosis	Developmental_glaucoma	Tremor	Plagiocephaly	Arthritis	Hoarse_voice	Cardiomegaly	Spastic_paraparesis	Headache	Spastic_tetraplegia	Scoliosis	Spasticity	Global_developmental_delay	Hypertonia	Porencephaly	Arrhinencephaly	Intellectual_disability_profound	Multifocal_cerebral_white_matter_abnormalities	Microcephaly	Eyelid_coloboma	Irritability	Dry_skin	Seizures	Dystonia	Hepatosplenomegaly	Unexplained_fevers	Abnormality_of_extrapyramidal_motor_function	Hypoplasia_of_the_corpus_callosum	Ventriculomegaly	Difficulty_walking	Loss_of_speech	Developmental_regression	Leukodystrophy	Cerebral_calcification	Elevated_hepatic_transaminase	Autoimmunity
Hypoglossia-hypodactyly_syndrome	Narrow_mouth	Cleft_palate	High_palate	Facial_asymmetry	Micrognathia	Wide_nasal_bridge	Telecanthus	Hypodontia	Brachydactyly	Split_hand	Abnormal_fingernail_morphology	Intellectual_disability	Abnormal_cranial_nerve_morphology	Death_in_infancy	Gastroschisis	Anal_atresia	Neurological_speech_impairment	Jejunal_atresia	Finger_syndactyly	Aplasia/Hypoplasia_of_fingers	Feeding_difficulties_in_infancy	Adactyly	Upper_limb_phocomelia	Short_distal_phalanx_of_finger	Aplasia/Hypoplasia_of_the_tongue	Hypoplasia_of_the_zygomatic_bone
Agnathia-holoprosencephaly-situs_inversus_syndrome	Narrow_mouth	Microglossia	Low-set_posteriorly_rotated_ears	Abnormality_of_the_eye	Agenesis_of_corpus_callosum	Abnormal_cranial_nerve_morphology	Holoprosencephaly	Polyhydramnios	Situs_inversus_totalis	Respiratory_distress	Aplasia/Hypoplasia_of_the_cerebellum	Hypoplasia_of_penis	Cyclopia	Aplasia/Hypoplasia_involving_the_nose	Mandibular_aplasia	Narrow_internal_auditory_canal	Absent_nares	Synotia	Aplasia/Hypoplasia_of_the_eyebrow
Testicular_regression_syndrome	Abnormal_morphology_of_female_internal_genitalia	Abnormality_of_male_internal_genitalia	Male_pseudohermaphroditism	Ambiguous_genitalia	Decreased_fertility	Abnormality_of_the_face	Absent_gonadal_tissue	Decreased_testicular_size	Hypoplasia_of_penis	Aplasia/Hypoplasia_of_the_testes	Absent_testis
Tibial_hemimelia-polysyndactyly-triphalangeal_thumb_syndrome	Abnormality_of_fibula_morphology	Short_stature	Synostosis_of_carpal_bones	Aplasia/Hypoplasia_of_the_tibia	Patellar_aplasia	Aplasia/Hypoplasia_of_the_thumb
Adrenomyodystrophy	Megacystis	Abnormality_of_the_urinary_system	Megalocornea	Seizures	Muscular_hypotonia	Hepatic_steatosis	Failure_to_thrive	Abnormal_intestine_morphology	Delayed_skeletal_maturation	Myopathy	EMG_abnormality	Short_stature	Reduced_bone_mineral_density	Generalized_hyperpigmentation	Primary_adrenal_insufficiency	Severe_global_developmental_delay
ADULT_syndrome	Abnormality_of_the_dentition	Abnormality_of_the_face	Prominent_nasal_bridge	Wide_nasal_bridge	Nasolacrimal_duct_obstruction	Dry_skin	Thin_skin	Melanocytic_nevus	Freckling	Alopecia	Abnormality_of_the_nail	Toe_syndactyly	Nail_pits	Split_foot	Sparse_scalp_hair	Fine_hair	Hypoplastic_nipples	Absent_nipple	Breast_hypoplasia	Finger_syndactyly	Abnormality_of_dental_morphology	Toenail_dysplasia	Fingernail_dysplasia	Skin_ulcer
Alopecia-epilepsy-pyorrhea-intellectual_disability_syndrome	Abnormality_of_the_dentition	Gingivitis	Hydrocephalus	Hearing_impairment	Abnormal_eyelash_morphology	Periodontitis	Melanocytic_nevus	Seizures	Intellectual_disability_mild	Sparse_scalp_hair	Sparse_body_hair	Alopecia_universalis	EEG_abnormality	Memory_impairment
Alopecia_universalis	Absent_eyelashes	Absent_eyebrow	Alopecia_areata	Alopecia_universalis
Scalp_defects-postaxial_polydactyly_syndrome	Skull_defect	Encephalocele	Sparse_scalp_hair	Postaxial_polydactyly_type_A
Alopecia-contractures-dwarfism-intellectual_disability_syndrome	Microcephaly	Turricephaly	Hypertelorism	Low-set_posteriorly_rotated_ears	Macrotia	Prominent_nose	Myopia	Upslanted_palpebral_fissure	Abnormality_of_dental_eNAME	Abnormality_of_the_skeletal_system	Hyperkeratosis	Hypohidrosis	Brachydactyly	Intellectual_disability	Joint_stiffness	Intrauterine_growth_retardation	Alopecia	Scoliosis	Kyphosis	Hip_dislocation	Vertebral_segmentation_defect	Severe_short_stature	Clinodactyly_of_the_5th_finger	Biparietal_narrowing	Synostosis_of_carpal_bones	Short_middle_phalanx_of_finger	Finger_syndactyly	Intellectual_disability_progressive	Ichthyosis	Sparse_hair	Abnormal_toenail_morphology	Moderate_postnatal_growth_retardation	Abnormality_of_the_antihelix	Abnormality_of_the_elbow	Abnormality_of_the_helix
Fetal_akinesia_deformation_sequence	Cryptorchidism	Cleft_palate	Hypertelorism	Micrognathia	Posteriorly_rotated_ears	Cystic_hygroma	Pterygium	Excessive_daytime_somnolence	Dandy-Walker_malformation	Intrauterine_growth_retardation	Polyhydramnios	Fetal_akinesia_sequence	Pulmonary_hypoplasia	Respiratory_insufficiency	Akinesia	Hypokinesia	Scoliosis	Arthrogryposis_multiplex_congenita	Multiple_joint_contractures	Generalized_amyotrophy	Intestinal_hypoplasia	Depressed_nasal_bridge	Absent_palmar_crease	Camptodactyly_of_finger
2q37_microdeletion_syndrome	Multicystic_kidney_dysplasia	Thin_vermilion_border	Microcephaly	Macrocephaly	Round_face	Conductive_hearing_impairment	Underdeveloped_nasal_alae	Anteverted_nares	Short_neck	Deeply_set_eye	Sparse_eyebrow	Upslanted_palpebral_fissure	Behavioral_abnormality	Autism	Obsessive-compulsive_behavior	Stereotypy	Congenital_diaphragmatic_hernia	Eczema	Brachydactyly	Intellectual_disability	Seizures	Muscular_hypotonia	Global_developmental_delay	Obesity	Umbilical_hernia	Laryngomalacia	Abnormal_aortic_morphology	Toe_syndactyly	Short_foot	Frontal_bossing	Pyloric_stenosis	Sparse_scalp_hair	Sleep_disturbance	Highly_arched_eyebrow	Supernumerary_nipple	Malformation_of_the_heart_and_great_vessels	Nephroblastoma	Downturned_corners_of_mouth	Tracheomalacia	Clinodactyly_of_the_5th_finger	Short_palm	Short_stature	Depressed_nasal_bridge	Joint_hyperflexibility	Finger_syndactyly	Wide_intermamillary_distance	Attention_deficit_hyperactivity_disorder	Bilateral_single_transverse_palmar_creases	Short_metacarpal
ENAME	Nephropathy	Nephrocalcinosis	Gingival_overgrowth	Abnormality_of_dental_eNAME	Delayed_eruption_of_teeth	Amelogenesis_imperfecta	Yellow-brown_discoloration_of_the_teeth	Abnormality_of_dental_color	Increased_circulating_osteocalcin_level	Abnormality_of_calcium-phosphate_metabolism	Renal_insufficiency	Enuresis	Hypocalciuria	Impaired_renal_concentrating_ability	Hypophosphaturia
Amelo-onycho-hypohidrotic_syndrome	Everted_lower_lip_vermilion	Abnormality_of_dental_eNAME	Delayed_eruption_of_teeth	Dry_skin	Hyperkeratosis	Hypohidrosis	Abnormal_fingernail_morphology	Hypoplastic_toenails	Onycholysis	Fine_hair	Yellow-brown_discoloration_of_the_teeth	Advanced_eruption_of_teeth	Abnormality_of_dental_morphology	Reduced_number_of_teeth	Abnormality_of_dental_color
Autosomal_recessive_amelia	Cryptorchidism	Scrotal_hypoplasia	Oral_cleft	Full_cheeks	Micrognathia	Polyhydramnios	Abnormal_cardiac_septum_morphology	Aplasia/Hypoplasia_of_the_lungs	Hypoplasia_of_penis	Amelia_involving_the_upper_limbs	Amelia	Acromelia_of_the_lower_limbs	Non-midline_cleft_lip
Amaurosis-hypertrichosis_syndrome	Abnormal_eyelash_morphology	Cone/cone-rod_dystrophy	Retinal_dystrophy	Thick_eyebrow	Photophobia	Nystagmus	Optic_atrophy	Synophrys	Coarse_hair	Congenital_visual_impairment	High_hypermetropia
Alopecia-intellectual_disability-hypergonadotropic_hypogonadism_syndrome	Hypergonadotropic_hypogonadism	Intellectual_disability_mild	Alopecia_totalis
Hereditary_neurocutaneous_malformation	Abnormality_of_the_nervous_system	Hemangioma	Seizures	Horner_syndrome
Congenital_left_ventricular_aneurysm	Abnormal_left_ventricle_morphology	Congestive_heart_failure	Apnea	Abnormal_T-wave	Arrhythmia	Abnormal_ST_segment
Vein_of_Galen_aneurysmal_malformation	Dilatation	Abnormality_of_the_cerebral_vasculature	Peripheral_arteriovenous_fistula
Mosaic_variegated_aneuploidy_syndrome	Multicystic_kidney_dysplasia	Ambiguous_genitalia	Cleft_palate	Microcephaly	Epicanthus	Triangular_face	Sloping_forehead	Micrognathia	High_forehead	Hearing_impairment	Low-set_posteriorly_rotated_ears	Wide_nose	Depressed_nasal_ridge	Abnormality_of_the_eye	Downslanted_palpebral_fissures	Glaucoma	Abnormality_of_vision	Cataract	Microphthalmia	Hypothyroidism	Abnormality_of_the_skeletal_system	Abnormal_skull_morphology	Abnormality_of_skin_pigmentation	Intellectual_disability	Seizures	Muscular_hypotonia	Global_developmental_delay	Dandy-Walker_malformation	Holoprosencephaly	Growth_delay	Intrauterine_growth_retardation	Ascites	Polyhydramnios	Atrial_septal_defect	Aortic_regurgitation	Abnormal_aortic_morphology	Coarctation_of_aorta	Subvalvular_aortic_stenosis	Frontal_bossing	Abnormal_lung_lobation	Apnea	Ventriculomegaly	Duodenal_atresia	Malformation_of_the_heart_and_great_vessels	Neoplasm	Nephroblastoma	Osteolysis	Abnormality_of_the_upper_limb	Rhabdomyosarcoma
Metaphyseal_anadysplasia	Abnormality_of_the_metaphysis	Joint_stiffness	Abnormality_of_the_lower_limb	Abnormality_of_the_ulna	Abnormality_of_ulnar_metaphysis	Short_stature	Abnormality_of_epiphysis_morphology	Bowing_of_the_long_bones	Aplasia/Hypoplasia_of_the_radius
Beta-mercaptolactate_cysteine_disulfiduria	Abnormality_of_the_ureter	High_palate	High_forehead	Low-set_posteriorly_rotated_ears	Convex_nasal_ridge	Anteverted_nares	Strabismus	Downslanted_palpebral_fissures	Dry_skin	Arachnodactyly	Intellectual_disability	Seizures	Muscular_hypotonia	Obesity	Umbilical_hernia	Atrial_septal_defect	Sandal_gap	Frontal_bossing	EEG_abnormality	Genu_valgum	Micromelia	Short_stature	Joint_hyperflexibility	Hypoplasia_of_the_ear_cartilage
Acheiropodia	Abnormality_of_the_metaphysis	Fibular_aplasia	Absent_radius	Absent_ulna	Absent_hand	Short_humerus	Abnormality_of_epiphysis_morphology	Upper_limb_phocomelia
Achondrogenesis	Inguinal_hernia	Macrocephaly	Long_philtrum	Micrognathia	Anteverted_nares	Short_neck	Thickened_nuchal_skin_fold	Cystic_hygroma	Narrow_chest	Umbilical_hernia	Polyhydramnios	Hydrops_fetalis	Frontal_bossing	Malformation_of_the_heart_and_great_vessels	Skeletal_dysplasia	Micromelia	Short_nose	Abnormal_enchondral_ossification	Severe_short_stature	Abnormality_of_bone_mineral_density	Aplasia/Hypoplasia_of_the_lungs	Short_thorax	Flat_face
Short-limb_skeletal_dysplasia_with_severe_combined_immunodeficiency	Inguinal_hernia	Pectus_excavatum	Abnormality_of_the_metaphysis	Abnormality_of_the_pancreas	Lymphopenia	Anemia	Malabsorption	Recurrent_respiratory_infections	Fine_hair	Aganglionic_megacolon	Long_fibula	Reduced_bone_mineral_density	Biparietal_narrowing	Severe_combined_immunodeficiency	Agammaglobulinemia	Cellular_immunodeficiency	White_hair	Cognitive_impairment
Oxoglutaric_aciduria	Hydrocephalus	Abnormality_of_Krebs_cycle_metabolism	Ataxia	Global_developmental_delay	Hypertonia	Skeletal_muscle_atrophy	Short_stature	Abnormal_salivary_gland_morphology	Abnormal_urine_alpha-ketoglutarate_concentration	Abnormality_of_movement
Abruzzo-Erickson_syndrome	Cryptorchidism	Hypospadias	Abnormal_palate_morphology	Cleft_palate	Malar_flattening	Epicanthus	Macrotia	Conductive_hearing_impairment	Sensorineural_hearing_impairment	Microcornea	Chorioretinal_coloboma	Coloboma	Iris_coloboma	Brachydactyly	Atrial_septal_defect	Toe_syndactyly	Short_toe	Radioulnar_synostosis	Short_stature	Coronal_hypospadias	Ulnar_deviation_of_finger	Chin_dimple	Flat_face	Abnormal_localization_of_kidney
Insulin-resistance_syndrome_type_A	Delayed_puberty	Hyperkeratosis	Subcutaneous_nodule	Generalized_hirsutism	Accelerated_skeletal_maturation	Type_II_diabetes_mellitus	Generalized_hyperpigmentation
Triple_A_syndrome	Adrenal_insufficiency	Seizures	Achalasia	Generalized_hyperpigmentation	Visual_impairment	Palmoplantar_keratoderma	Short_stature	Microcephaly	Sensorineural_hearing_impairment	Iris_coloboma	Optic_atrophy	Anterior_hypopituitarism	Ataxia	Muscular_hypotonia	Hyperreflexia	Abnormality_of_the_calf_musculature	Pes_cavus	Respiratory_insufficiency	Developmental_regression	Motor_axonal_neuropathy	Plantar_hyperkeratosis	Abnormality_of_the_hypothenar_eminence
Achalasia-microcephaly_syndrome	Microcephaly	Epicanthus	Mandibular_prognathia	Micrognathia	Macrotia	Prominent_nose	Intellectual_disability	Growth_delay	Achalasia	Abnormal_dermatoglyphics
Acrocraniofacial_dysostosis	Cleft_palate	Microcephaly	Turricephaly	Hypertelorism	Short_philtrum	Sloping_forehead	Micrognathia	Low-set_posteriorly_rotated_ears	Abnormality_of_the_pinna	Conductive_hearing_impairment	Sensorineural_hearing_impairment	Prominent_nasal_bridge	Choanal_atresia	Anteverted_nares	Downslanted_palpebral_fissures	Telecanthus	Ptosis	Proptosis	Myopia	Lacrimation_abnormality	Pectus_excavatum	Tapered_finger	Triphalangeal_thumb	Abnormal_fingernail_morphology	Craniosynostosis	Malformation_of_the_heart_and_great_vessels	Coxa_valga	Genu_valgum	Flared_iliac_wings	Abnormality_of_the_hip_bone	Spina_bifida_occulta	Abnormal_form_of_the_vertebral_bodies	Short_stature	Abnormality_of_the_middle_ear_ossicles	Preauricular_pit	Advanced_eruption_of_teeth	Abnormal_toenail_morphology	Ulnar_deviation_of_finger	Short_distal_phalanx_of_finger	Short_1st_metacarpal	Partial_duplication_of_the_distal_phalanx_of_the_hallux	Broad_thumb	Abnormality_of_the_incus	Abnormality_of_the_malleus
Acrodermatitis_enteropathica	Abnormality_of_the_tongue	Glossitis	Furrowed_tongue	Abnormal_eyelid_morphology	Blepharitis	Visual_impairment	Conjunctivitis	Abnormal_eyebrow_morphology	Photophobia	Emotional_lability	Dry_skin	Failure_to_thrive	Alopecia	Abnormality_of_the_nail	Ridged_nail	Paronychia	Weight_loss	Malabsorption	Chronic_diarrhea	Anorexia	Cerebral_cortical_atrophy	Short_stature	Poor_appetite	Abnormal_blistering_of_the_skin	Ridged_fingernail	Erythema	Generalized_abnormality_of_skin	Cheilitis	Corneal_erosion	Pustule	Skin_ulcer
Acrodysostosis	Cryptorchidism	Abnormality_of_female_external_genitalia	Hypogonadism	Open_mouth	Brachycephaly	Epicanthus	Mandibular_prognathia	Hypertelorism	Hypoplasia_of_the_maxilla	Hearing_impairment	Wide_nasal_bridge	Depressed_nasal_ridge	Anteverted_nares	Delayed_eruption_of_teeth	Irregular_menstruation	Melanocytic_nevus	Brachydactyly	Abnormality_of_the_metacarpal_bones	Intellectual_disability	Abnormality_of_the_nail	Short_toe	Abnormality_of_the_radius	Micromelia	Hypoplasia_of_the_radius	Abnormality_of_the_ulna	Hypoplasia_of_the_ulna	Short_nose	Abnormal_form_of_the_vertebral_bodies	Spinal_canal_stenosis	Short_stature	Depressed_nasal_bridge	Accelerated_skeletal_maturation	Peripheral_neuropathy	Short_metacarpal	Cone-shaped_epiphysis	Epiphyseal_stippling	Short_metatarsal	Open_bite	Abnormality_of_immune_system_physiology	Midface_retrusion
Peripheral_dysostosis	Brachydactyly	Joint_stiffness	Osteoarthritis	Clinodactyly_of_the_5th_finger	Short_stature	Cone-shaped_epiphyses_of_the_phalanges_of_the_hand
3-hydroxyisobutyric_aciduria	Microcephaly	Triangular_face	Sloping_forehead	Long_philtrum	Micrognathia	Seizures	Intrauterine_growth_retardation	Ventriculomegaly	Cerebral_cortical_atrophy	Cerebral_calcification	Lactic_acidosis	Low_gonadotropins_(secondary_hypogonadism)	Aplasia/Hypoplasia_of_the_cerebellum	Aplasia/Hypoplasia_of_the_corpus_callosum	Microtia
Vitamin_B12-unresponsive_methylmalonic_acidemia	Renal_insufficiency	Optic_atrophy	Intellectual_disability	Seizures	Ataxia	Muscular_hypotonia	Lethargy	Coma	Global_developmental_delay	Choreoathetosis	Cardiomyopathy	Pancreatitis	Thrombocytopenia	Leukopenia	Anemia	Dehydration	Macrocytic_anemia	Hyperammonemia	Nausea_and_vomiting	Respiratory_insufficiency	Neurological_speech_impairment	Hepatomegaly	Tetraparesis	Paraparesis	Immunodeficiency
Acalvaria	Cleft_palate	Hydrocephalus	Hypertelorism	Abnormal_skull_morphology	Postaxial_hand_polydactyly	Holoprosencephaly	Skull_defect	Omphalocele	Talipes	Abnormal_lung_lobation	Abnormality_of_neuronal_migration	Spina_bifida	Malformation_of_the_heart_and_great_vessels	Aplasia/Hypoplasia_of_the_cerebellum
Acro-renal-ocular_syndrome	Bladder_diverticulum	Vesicoureteral_reflux	Horseshoe_kidney	Epicanthus	Hypertelorism	Conductive_hearing_impairment	Sensorineural_hearing_impairment	Microcornea	Strabismus	Visual_impairment	Ptosis	Cataract	Chorioretinal_coloboma	Microphthalmia	Optic_nerve_coloboma	Coloboma	Iris_coloboma	Nystagmus	Abnormal_thumb_morphology	Preaxial_hand_polydactyly	Triphalangeal_thumb	Tetralogy_of_Fallot	Toe_syndactyly	Sandal_gap	Talipes	Aganglionic_megacolon	Abnormality_of_the_radius	Vertebral_fusion	Hypoplasia_of_the_ulna	Vertebral_segmentation_defect	Radial_club_hand	Renal_malrotation	Crossed_fused_renal_ectopia	Short_humerus	Finger_syndactyly	Aplasia/Hypoplasia_of_the_radius	Optic_disc_hypoplasia	Renal_hypoplasia/aplasia	Postnatal_growth_retardation	Short_distal_phalanx_of_the_thumb	Short_thumb	Broad_hallux_phalanx	Short_hallux	Short_palpebral_fissure
Acro-renal-mandibular_syndrome	Oral_cleft	High_palate	Narrow_face	Short_philtrum	Micrognathia	Low-set_posteriorly_rotated_ears	Short_neck	Downslanted_palpebral_fissures	Pectus_carinatum	Congenital_diaphragmatic_hernia	Bicornuate_uterus	Hypoplastic_scapulae	Thin_ribs	Abnormality_of_the_clavicle	Sprengel_anomaly	Split_hand	Intrauterine_growth_retardation	Oligohydramnios	Split_foot	Pulmonary_hypoplasia	Abnormal_lung_lobation	Tracheoesophageal_fistula	Scoliosis	Kyphosis	Hip_dislocation	Hemivertebrae	Hypoplasia_of_the_radius	Hypoplasia_of_the_ulna	Butterfly_vertebrae	Uterus_didelphys	Abnormality_of_the_sense_of_smell	Finger_syndactyly	Rudimentary_fibula	Rudimentary_to_absent_tibiae	Renal_hypoplasia/aplasia	Aplasia/Hypoplasia_of_the_tongue	Hypoplasia_of_the_zygomatic_bone
Hypertrichosis-acromegaloid_facial_appearance_syndrome	Gingival_overgrowth	Furrowed_tongue	Everted_lower_lip_vermilion	Coarse_facial_features	Bulbous_nose	Blepharophimosis	Abnormality_of_the_hand	Intellectual_disability	Generalized_hirsutism	Joint_hyperflexibility	Oral_synechia	Thick_vermilion_border	Palpebral_edema
Acromegaloid_facial_appearance_syndrome	Abnormality_of_the_tongue	Macroglossia	Abnormal_lip_morphology	Thick_lower_lip_vermilion	Gingival_overgrowth	Everted_lower_lip_vermilion	Coarse_facial_features	Hypertelorism	Sloping_forehead	Micrognathia	Bulbous_nose	Thick_eyebrow	Blepharophimosis	Synophrys	Thickened_skin	Abnormality_of_the_metacarpal_bones	Large_hands	Tapered_finger	Seizures	Intellectual_disability_mild	Highly_arched_eyebrow	Long_nose	Craniofacial_hyperostosis	Joint_hyperflexibility	Thick_nasal_alae	Palpebral_edema
Hajdu-Cheney_syndrome	Inguinal_hernia	Hypospadias	Narrow_mouth	Abnormality_of_the_dentition	Cleft_palate	Thin_vermilion_border	Hydrocephalus	Macrocephaly	Dolichocephaly	Prominent_occiput	Abnormality_of_the_mandible	Coarse_facial_features	Full_cheeks	Low_anterior_hairline	Hypertelorism	Long_philtrum	Micrognathia	Hearing_impairment	Low-set_ears	Wide_nasal_bridge	Wide_nose	Anteverted_nares	Short_neck	Downslanted_palpebral_fissures	Telecanthus	Cataract	Myopia	Thick_eyebrow	Iris_coloboma	Synophrys	Periodontitis	Pectus_carinatum	Delayed_puberty	Abnormal_skull_morphology	Osteopenia	Osteoporosis	Dry_skin	Thickened_skin	Brachydactyly	Abnormal_fingernail_morphology	Failure_to_thrive	Umbilical_hernia	Abnormality_of_the_voice	Ventricular_septal_defect	Patent_ductus_arteriosus	Aortic_valve_stenosis	Mitral_stenosis	Splenomegaly	Short_toe
Acrofacial_dysostosis_Weyers_type	Abnormality_of_the_dentition	Abnormal_oral_frenulum_morphology	Hypodontia	Conical_tooth	Postaxial_hand_polydactyly	Abnormal_fingernail_morphology	Small_nail	Hypoplastic_toenails	Facial_cleft	Mild_short_stature	Clinodactyly_of_the_5th_finger	Advanced_eruption_of_teeth	Single_median_maxillary_incisor	Abnormal_toenail_morphology	Nail_dystrophy	Abnormality_of_the_antihelix	Overlapping_fingers	Toenail_dysplasia	Small_hand
Acropectorovertebral_dysplasia	Cleft_palate	Pectus_excavatum	Triphalangeal_thumb	Intellectual_disability_mild	Spina_bifida	High_narrow_palate	Synostosis_of_carpal_bones	Finger_syndactyly	Tarsal_synostosis	Short_distal_phalanx_of_finger	Broad_thumb	Camptodactyly_of_finger
Hereditary_continuous_muscle_fiber_activity	Congenital_diaphragmatic_hernia	Seizures	Ataxia	Dysarthria	Slurred_speech	Spastic_gait	Elevated_serum_creatine_kinase	EMG_abnormality	Type_1_muscle_fiber_predominance	Abnormality_of_movement
Acrorenal_syndrome	Renal_insufficiency	Cleft_palate	Micrognathia	Abnormality_of_the_eye	Abnormality_of_vision	Split_hand	Abnormality_of_tibia_morphology	Abnormality_of_the_ulna	Aplasia/Hypoplasia_of_the_radius	Renal_hypoplasia/aplasia	Abnormal_renal_morphology
Adams-Oliver_syndrome	Hydrocephalus	Strabismus	Cataract	Microphthalmia	Cutis_marmorata	Aplasia_cutis_congenita	Brachydactyly	Abnormality_of_the_metacarpal_bones	Split_hand	Intellectual_disability	Seizures	Hemiparesis	Hypertonia	Skull_defect	Cirrhosis	Portal_hypertension	Failure_to_thrive	Ascites	Alopecia	Premature_birth	Tetralogy_of_Fallot	Abnormal_pulmonary_valve_morphology	Hypoplastic_fingernail	Absent_fingernail	Thrombocytopenia	Leukopenia	Talipes	Esophageal_varix	Encephalocele	Pulmonary_arterial_hypertension	Porencephaly	Gastrointestinal_hemorrhage	EEG_abnormality	Congenital_hepatic_fibrosis	Abnormality_of_the_lower_limb	Abnormality_of_the_upper_limb	Absent_hand	Pulmonary_artery_atresia	Finger_syndactyly	Periventricular_leukomalacia	Aplasia/Hypoplasia_of_the_skin	Sparse_hair	Short_distal_phalanx_of_finger	Aplastic/hypoplastic_toenail	Absent_toe	Arteriovenous_malformation
Congenital_absence/hypoplasia_of_fingers_excluding_thumb_unilateral	Abnormality_of_the_metacarpal_bones	Short_nail	Short_thumb	Duplication_of_the_distal_phalanx_of_the_5th_finger	Short_metacarpal
Acromesomelic_dysplasia_Maroteaux_type	Dolichocephaly	Sprengel_anomaly	Brachydactyly	Joint_stiffness	Frontal_bossing	Scoliosis	Kyphosis	Acromesomelia	Ovoid_vertebral_bodies	Hyperlordosis	Abnormal_form_of_the_vertebral_bodies	Disproportionate_short_stature	Beaking_of_vertebral_bodies	Depressed_nasal_bridge	Joint_hyperflexibility	Bowing_of_the_long_bones	Vertebral_wedging	Prominent_forehead
Acromesomelic_dysplasia_Hunter-Thompson_type	Brachydactyly	Joint_stiffness	Neurological_speech_impairment	Abnormality_of_pelvic_girdle_bone_morphology	Scoliosis	Hip_dislocation	Patellar_dislocation	Abnormality_of_the_ankles	Elbow_dislocation	Acromesomelia	Cuboidal_metacarpal	Abnormally_shaped_carpal_bones	Bilateral_single_transverse_palmar_creases	Tarsal_synostosis	Severe_short-limb_dwarfism	Short_thumb	Short_metacarpal	Cognitive_impairment
Hereditary_sensory_and_autonomic_neuropathy_type_2	Hyperhidrosis	Tapered_finger	Dystrophic_toenail	Acroosteolysis_(feet)	Wormian_bones	Osteolysis	Abnormality_of_the_knee	Abnormality_of_the_ankles	Abnormal_cortical_bone_morphology	Skeletal_muscle_atrophy	Abnormality_of_the_hip_bone	Hyperlordosis	Reduced_bone_mineral_density	Abnormality_of_epiphysis_morphology	Dystrophic_fingernails
Acromicric_dysplasia	Narrow_mouth	Thick_lower_lip_vermilion	Round_face	Long_philtrum	Bulbous_nose	Anteverted_nares	Long_eyelashes	Abnormal_eyebrow_morphology	Decreased_nerve_conduction_velocity	Brachydactyly	Joint_stiffness	Hoarse_voice	Delayed_skeletal_maturation	Abnormality_of_femur_morphology	Short_nose	Ovoid_vertebral_bodies	Severe_short_stature	Short_palm	Fifth_metacarpal_with_ulnar_notch	Abnormality_of_epiphysis_morphology	Short_metacarpal	Small_hand
Cerebellar_ataxia-ectodermal_dysplasia_syndrome	Inguinal_hernia	Cryptorchidism	Triangular_face	Broad_forehead	Hypodontia	Microdontia	Ataxia	Gait_disturbance	Pes_cavus	Neurological_speech_impairment	Fine_hair	Sparse_hair
Congenital_unilateral_hypoplasia_of_depressor_anguli_oris	Cryptorchidism	Vesicoureteral_reflux	Cleft_palate	Abnormality_of_lower_lip	Microcephaly	Micrognathia	Congenital_diaphragmatic_hernia	Global_developmental_delay	Hypertonia	Joint_stiffness	Ventricular_septal_defect	Tetralogy_of_Fallot	Abnormal_aortic_morphology	Abnormality_of_the_respiratory_system	Respiratory_insufficiency	Cerebral_cortical_atrophy	Malformation_of_the_heart_and_great_vessels	Abnormality_of_the_hip_bone	Vertebral_segmentation_defect	Short_stature	Abnormality_of_the_pulmonary_artery	Multiple_renal_cysts	Asymmetric_crying_face	Protruding_ear	Renal_hypoplasia/aplasia	Reduced_number_of_teeth
Ataxia-oculomotor_apraxia_type_1	Abnormality_of_the_nervous_system	Ataxia	Gait_disturbance	Peripheral_neuropathy	Medial_flaring_of_the_eyebrow
Cerebellar_ataxia-hypogonadism_syndrome	Hypogonadotrophic_hypogonadism	Hypogonadism	Decreased_fertility	Brachycephaly	Abnormal_electroretinogram	Nystagmus	Optic_atrophy	Behavioral_abnormality	Dementia	Personality_changes	Gynecomastia	Abnormality_of_the_hypothalamus-pituitary_axis	Ataxia	Muscular_hypotonia	Neurological_speech_impairment	Supernumerary_nipple	Clinodactyly_of_the_5th_finger	Short_stature	Hemiplegia/hemiparesis	Abnormality_of_retinal_pigmentation
Ataxia-hypogonadism-choroidal_dystrophy_syndrome	Hypogonadotrophic_hypogonadism	Ataxia	Congenital_chorioretinal_dystrophy
Ataxia-tapetoretinal_degeneration_syndrome	Nystagmus	Ataxia	Muscular_hypotonia	Gait_disturbance	Aplasia/Hypoplasia_of_the_cerebellum	Cognitive_impairment	Visual_impairment	Tapetoretinal_degeneration	Pigmentary_retinopathy
Benign_paroxysmal_tonic_upgaze_of_childhood_with_ataxia	Abnormality_of_eye_movement	Nystagmus	Episodic_ataxia
Spinocerebellar_ataxia-dysmorphism_syndrome	Macrocephaly	Dolichocephaly	Epicanthus	Broad_forehead	Low-set_posteriorly_rotated_ears	Anteverted_nares	Ptosis	Proptosis	Nystagmus	Optic_atrophy	Hyperextensible_skin	Muscular_hypotonia	Global_developmental_delay	Coarse_hair	Downturned_corners_of_mouth	Genu_recurvatum	Cubitus_valgus	Slender_long_bone	Short_nose	Spina_bifida_occulta	EMG_abnormality	Short_stature	Reduced_bone_mineral_density	Joint_hyperflexibility	Aplasia/Hypoplasia_of_the_cerebellum	Thick_vermilion_border
Infantile-onset_spinocerebellar_ataxia	Hearing_impairment	Ophthalmoplegia	Optic_atrophy	Ataxia	Reduced_tendon_reflexes	Abnormality_of_the_autonomic_nervous_system	Abnormality_of_movement
Spastic_ataxia_with_congenital_miosis	Nystagmus	Seizures	Ataxia	Dysarthria	Hyperreflexia	Spastic_ataxia	Hemiplegia/hemiparesis	Congenital_miosis
Ataxia-photosensitivity-short_stature_syndrome	Abnormality_of_the_dentition	High_palate	Strabismus	Dry_skin	Cutaneous_photosensitivity	Urticaria	Ataxia	Gait_disturbance	Reduced_tendon_reflexes	Malformation_of_the_heart_and_great_vessels	Cubitus_valgus	Clinodactyly_of_the_5th_finger	Short_stature	Bilateral_single_transverse_palmar_creases	Abnormality_of_movement	Cognitive_impairment
Atkin-Flaitz_syndrome	Macroorchidism	Abnormality_of_the_dentition	Everted_lower_lip_vermilion	Macrocephaly	Coarse_facial_features	Hypertelorism	Prominent_supraorbital_ridges	Broad_forehead	Macrotia	Broad_nasal_tip	Anteverted_nares	Intellectual_disability	Obesity	Maxillary_lateral_incisor_microdontia	Short_stature	Thick_vermilion_border
Colonic_atresia	Omphalocele	Gastroschisis	Abdominal_distention	Abdominal_situs_inversus	Peptic_ulcer	Colonic_atresia	Abnormality_of_mesentery_morphology	Duodenal_stenosis
Ataxia-deafness-intellectual_disability_syndrome	Abnormal_palate_morphology	Sensorineural_hearing_impairment	Strabismus	Nystagmus	Decreased_nerve_conduction_velocity	Intellectual_disability	Ataxia	Muscular_hypotonia	Reduced_tendon_reflexes	Ventriculomegaly	Cerebral_cortical_atrophy	Neurological_speech_impairment	Scoliosis	Skeletal_muscle_atrophy	EMG_abnormality	Joint_hyperflexibility	Aplasia/Hypoplasia_of_the_cerebellum
Progressive_hemifacial_atrophy	Abnormality_of_the_mandible	Facial_asymmetry	Micrognathia	Irregular_hyperpigmentation	Seizures	Abnormality_of_the_musculature	Aplasia/Hypoplasia_of_the_skin	Asymmetric_growth	Deeply_set_eye	Ptosis	Heterochromia_iridis
Pulmonary_atresia-intact_ventricular_septum_syndrome	Premature_birth	Patent_ductus_arteriosus	Abnormal_tricuspid_valve_morphology	Pulmonary_artery_atresia	Maternal_diabetes
Duodenal_atresia	Polyhydramnios	Abnormality_of_the_pancreas	Annular_pancreas	Duodenal_atresia	Abnormality_of_the_pulmonary_artery
Burn-McKeown_syndrome	Abnormal_palate_morphology	Hypertelorism	Prominent_nasal_bridge	Wide_nasal_bridge	Abnormality_of_the_eye	Abnormality_of_vision	Abnormal_cardiac_septum_morphology	Short_nose	Short_stature	Bilateral_choanal_atresia	Short_palpebral_fissure
Baller-Gerold_syndrome	Abnormality_of_the_ureter	Vesicoureteral_reflux	Hydronephrosis	Narrow_mouth	Cleft_palate	High_palate	Large_fontanelles	Brachyturricephaly	Brachycephaly	Narrow_face	Epicanthus	Hypertelorism	Broad_forehead	Micrognathia	Conductive_hearing_impairment	Prominent_nasal_bridge	Narrow_nasal_bridge	Proptosis	Hypotelorism	Nystagmus	Poikiloderma	Abnormality_of_the_metacarpal_bones	Hand_oligodactyly	Abnormality_of_the_carpal_bones	Growth_delay	Intrauterine_growth_retardation	Failure_to_thrive_in_infancy	Anteriorly_placed_anus	Abnormal_cardiac_septum_morphology	Frontal_bossing	Anal_atresia	Malabsorption	Scoliosis	Lymphoma	Osteosarcoma	Short_nose	Short_stature	Bowing_of_the_long_bones	Aplasia/Hypoplasia_of_the_patella	Aplasia/Hypoplasia_of_the_radius	Aplasia/Hypoplasia_of_the_thumb	Abnormal_localization_of_kidney	Urogenital_fistula
Cheilitis_glandularis	Thick_lower_lip_vermilion	Neoplasm	Squamous_cell_carcinoma	Abnormal_salivary_gland_morphology	Abnormality_of_immune_system_physiology
Autosomal_dominant_congenital_benign_spinal_muscular_atrophy	Muscular_hypotonia	Joint_stiffness	Distal_amyotrophy	Cachexia	Nonprogressive_muscular_atrophy
Bannayan-Riley-Ruvalcaba_syndrome	Tall_stature	Narrow_palate	Macrocephaly	Dolichocephaly	Long_philtrum	Micrognathia	Macrotia	Wide_nose	Anteverted_nares	Abnormality_of_the_optic_nerve	Pectus_excavatum	Hashimoto_thyroiditis	Cutis_marmorata	Lymphedema	Telangiectasia	Intellectual_disability	Seizures	Muscular_hypotonia	Muscle_weakness	Subcutaneous_nodule	Angina_pectoris	Aortic_dilatation	Subcutaneous_hemorrhage	Hypoglycemia	Frontal_bossing	Neurological_speech_impairment	Intracranial_hemorrhage	Delayed_gross_motor_development	Abnormal_large_intestine_morphology	Scoliosis	Neoplasm	Lymphoma	Delayed_skeletal_maturation	Meningioma	Thyroid_carcinoma	Short_nose	Myopathy	Skeletal_muscle_atrophy	Nevus	Short_stature	Cachexia	Hamartomatous_polyposis	Capillary_hemangioma	Joint_hyperflexibility	Irregular_hyperpigmentation	Multiple_cafe-au-lait_spots	Abdominal_wall_muscle_weakness	Uterine_neoplasm	Broad_thumb
Banki_syndrome	Brachydactyly	Abnormality_of_the_metacarpal_bones	Clinodactyly_of_the_5th_finger	Synostosis_of_carpal_bones
Bangstad_syndrome	Abnormal_testis_morphology	Polycystic_ovaries	Abnormality_of_the_dentition	Microcephaly	Narrow_face	Sloping_forehead	Convex_nasal_ridge	Deeply_set_eye	Hypothyroidism	Abnormality_of_the_parathyroid_gland	Hyperinsulinemia	Intellectual_disability	Seizures	Ataxia	Intrauterine_growth_retardation	Hypercortisolism	EEG_abnormality	Deviation_of_finger	Short_stature	Primary_gonadal_insufficiency	Type_I_diabetes_mellitus
Bamforth-Lazarus_syndrome	Cleft_palate	Retrognathia	Choanal_atresia	Congenital_hypothyroidism	Intellectual_disability	Polyhydramnios	Thyroid_agenesis	Abnormal_hair_quantity
Severe_microbrachycephaly-intellectual_disability-athetoid_cerebral_palsy_syndrome	Abnormal_palate_morphology	Brachycephaly	Microcephaly	Mandibular_prognathia	Hypertelorism	Facial_asymmetry	Broad_forehead	Preauricular_skin_tag	Strabismus	Telecanthus	Microphthalmia	Blue_sclerae	Iris_coloboma	Hypodontia	Abnormality_of_the_thorax	Tapered_finger	Seizures	Hypertonia	Facial_cleft	Frontal_bossing	Supernumerary_nipple	Scoliosis	Abnormal_dermatoglyphics	Bilateral_single_transverse_palmar_creases	Large_earlobe	Chin_dimple	Broad_thumb	Abnormality_of_movement	Lip_pit	Camptodactyly_of_finger	Cognitive_impairment	Hypoplasia_of_the_ear_cartilage
Bartsocas-Papas_syndrome	Hypoplastic_male_external_genitalia	Ambiguous_genitalia	Narrow_mouth	Median_cleft_lip	Cleft_palate	Microcephaly	Micrognathia	Underdeveloped_nasal_alae	Eyelid_coloboma	Intellectual_disability	Toe_syndactyly	Hypoplastic_toenails	Talipes	Malformation_of_the_heart_and_great_vessels	Short_nose	Finger_syndactyly	Alopecia_totalis	Corneal_opacity	Renal_hypoplasia/aplasia	Ankyloblepharon	Popliteal_pterygium	Absent_thumb	Aplasia/Hypoplasia_of_the_distal_phalanges_of_the_toes	Synostosis_of_joints	Aplasia/Hypoplasia_of_the_eyebrow	Sparse_or_absent_eyelashes
Barber-Say_syndrome	Shawl_scrotum	Wide_mouth	Abnormality_of_the_face	Hypertelorism	Hearing_impairment	Abnormality_of_the_pinna	Atresia_of_the_external_auditory_canal	Bulbous_nose	Wide_nasal_bridge	Anteverted_nares	Telecanthus	Ectropion	Delayed_eruption_of_teeth	Hyperextensible_skin	Failure_to_thrive	Redundant_skin	Generalized_hirsutism	Hypoplastic_nipples	Aplasia/Hypoplasia_of_the_skin	Ablepharon	Breast_aplasia	Aplasia/Hypoplasia_of_the_eyebrow	Sparse_or_absent_eyelashes
Congenital_intrauterine_infection-like_syndrome	Microcephaly	Seizures	Spasticity	Hyperreflexia	Cerebral_cortical_atrophy	Cerebral_calcification	Abnormality_of_movement
Aniridia-renal_agenesis-psychomotor_retardation_syndrome	Unilateral_renal_agenesis	Micrognathia	Anteverted_nares	Strabismus	Telecanthus	Developmental_glaucoma	Muscular_hypotonia	Communicating_hydrocephalus	Craniosynostosis	Frontal_bossing	Downturned_corners_of_mouth	Short_stature	Depressed_nasal_bridge	Corneal_opacity	Mild_global_developmental_delay	Partial_aniridia
Aniridia-ptosis-intellectual_disability-familial_obesity_syndrome	Visual_impairment	Ptosis	Cataract	Myopia	Intellectual_disability	Alopecia	Abnormal_heart_morphology	Hypopigmentation_of_hair	Corneal_opacity	Aplasia/Hypoplasia_of_the_iris	Persistent_pupillary_membrane
Aniridia-intellectual_disability_syndrome	Cataract	Aniridia	Optic_nerve_hypoplasia	Ectopia_lentis	Intellectual_disability_moderate
Aniridia-absent_patella_syndrome	Inguinal_hernia	Cryptorchidism	Glaucoma	Ptosis	Cataract	Aniridia	Muscular_hypotonia	Aplasia/Hypoplasia_of_the_patella
Ankyloblepharon-ectodermal_defects-cleft_lip/palate_syndrome	Cleft_palate	Submucous_cleft_hard_palate	Micrognathia	Conductive_hearing_impairment	Protruding_ear	Wide_nasal_bridge	Sparse_eyebrow	Sparse_eyelashes	Hypodontia	Abnormality_of_dental_eNAME	Delayed_eruption_of_teeth	Widely_spaced_teeth	Conical_tooth	Hypohidrosis	Palmoplantar_keratoderma	Hypotrichosis	Absent_lacrimal_punctum	Abnormality_of_the_voice	Ventricular_septal_defect	Hyperconvex_nail	Dystrophic_toenail	Hyperconvex_fingernails	Coarse_hair	Supernumerary_nipple	Clinodactyly_of_the_5th_finger	Finger_syndactyly	Generalized_hyperpigmentation	Dystrophic_fingernails	Ankyloblepharon	Submucous_cleft_soft_palate	Non-midline_cleft_lip
Ankyloblepharon_filiforme_adnatum-cleft_palate_syndrome	Cleft_palate	Ankyloblepharon	Amniotic_constriction_ring	Lip_pit	Non-midline_cleft_lip
Ankyloblepharon_filiforme_adnatum-imperforate_anus_syndrome	Cryptorchidism	Cleft_palate	Ankyloblepharon	Reduced_number_of_teeth	Non-midline_cleft_lip
Dental_ankylosis	Mandibular_prognathia	Abnormality_of_dental_eNAME	Clinodactyly_of_the_5th_finger	Reduced_number_of_teeth
Thumb_stiffness-brachydactyly-intellectual_disability_syndrome	Abnormality_of_the_metacarpal_bones	Abnormal_thumb_morphology	Intellectual_disability	Joint_stiffness	Obesity	Type_A_brachydactyly
Anonychia-microcephaly_syndrome	Abnormality_of_the_dentition	Microcephaly	Sloping_forehead	Carious_teeth	Anonychia	Clinodactyly_of_the_5th_finger	Bilateral_single_transverse_palmar_creases	Aplastic/hypoplastic_toenail
Anophthalmia_plus_syndrome	Cleft_palate	Hypertelorism	Low-set_posteriorly_rotated_ears	Choanal_atresia	Anophthalmia	Blepharophimosis	Iris_coloboma	Eyelid_coloboma	Facial_cleft	Spina_bifida	Bilateral_cleft_lip_and_palate	Vertebral_segmentation_defect	Deviation_of_finger	Abnormal_nasal_morphology	Aplasia/Hypoplasia_of_the_earlobes	Non-midline_cleft_lip
Microphthalmia_with_limb_anomalies	Cryptorchidism	Horseshoe_kidney	Cleft_palate	Cleft_upper_lip	High_palate	Thin_vermilion_border	Hydrocephalus	Hypoplasia_of_the_maxilla	Long_philtrum	Micrognathia	Low-set_posteriorly_rotated_ears	Abnormal_eyebrow_morphology	Microphthalmia	Blepharophimosis	Optic_atrophy	Postaxial_hand_polydactyly	Abnormality_of_the_metacarpal_bones	Abnormal_thumb_morphology	Hand_oligodactyly	Camptodactyly_of_2nd-5th_fingers	Failure_to_thrive	Death_in_infancy	Macrodontia	Talipes_equinovarus	Toe_syndactyly	Postaxial_foot_polydactyly	Foot_oligodactyly	Sandal_gap	Frontal_bossing	Arrhinencephaly	Intellectual_disability_moderate	Abnormality_of_the_lower_limb	Abnormality_of_the_upper_limb	Hip_dislocation	Tibial_bowing	Short_long_bone	Fibular_hypoplasia	Elbow_dislocation	Abnormal_form_of_the_vertebral_bodies	Clinodactyly_of_the_5th_finger	Short_stature	Synostosis_of_carpal_bones	Depressed_nasal_bridge	Venous_insufficiency	Joint_hyperflexibility	Short_tibia	Finger_syndactyly	Bowing_of_the_long_bones	Bilateral_single_transverse_palmar_creases
Antley-Bixler_syndrome	Narrow_mouth	Cleft_palate	Brachycephaly	Turricephaly	Delayed_cranial_suture_closure	Hypertelorism	Long_philtrum	Low-set_posteriorly_rotated_ears	Choanal_atresia	Anteverted_nares	Strabismus	Downslanted_palpebral_fissures	Proptosis	Abnormality_of_the_ribs	Narrow_chest	Arachnodactyly	Craniosynostosis	Joint_stiffness	Talipes	Frontal_bossing	Malformation_of_the_heart_and_great_vessels	Recurrent_fractures	Femoral_bowing	Elbow_ankylosis	Short_nose	Narrow_pelvis_bone	Underdeveloped_supraorbital_ridges	Hypoplasia_of_the_zygomatic_bone	Abnormal_renal_morphology	Camptodactyly_of_finger
Aortic_arch_anomaly-facial_dysmorphism-intellectual_disability_syndrome	Narrow_mouth	Microcephaly	Mandibular_prognathia	Facial_asymmetry	Triangular_face	Broad_forehead	Low-set_posteriorly_rotated_ears	Macrotia	Prominent_nasal_bridge	Convex_nasal_ridge	Downslanted_palpebral_fissures	Carious_teeth	Behavioral_abnormality	Intellectual_disability	Muscular_hypotonia	Intrauterine_growth_retardation	Overriding_aorta	Downturned_corners_of_mouth	Genu_varum	Abnormality_of_the_hip_bone	Hypoplasia_of_the_zygomatic_bone	Abnormal_aortic_arch_morphology	Arteriovenous_malformation
Aphalangy-syndactyly-microcephaly_syndrome	Microcephaly	Abnormality_of_the_metacarpal_bones	Toe_syndactyly	Anonychia	Hypoplastic_toenails	Absent_toenail	Hypoplastic_fingernail	Postaxial_foot_polydactyly	Split_foot	Short_stature	Symphalangism_affecting_the_phalanges_of_the_hand	Short_distal_phalanx_of_finger	Aplasia/Hypoplasia_of_the_distal_phalanges_of_the_toes	Camptodactyly_of_finger
Aphalangy-hemivertebrae-urogenital-intestinal_dysgenesis_syndrome	Abnormality_of_female_external_genitalia	Abnormality_of_the_metacarpal_bones	Asymmetry_of_the_thorax	Oligohydramnios	Patent_ductus_arteriosus	Toe_syndactyly	Anonychia	Split_foot	Pulmonary_hypoplasia	Abnormality_of_pelvic_girdle_bone_morphology	Hemivertebrae	Elbow_dislocation	Vaginal_fistula	Finger_syndactyly	Renal_hypoplasia/aplasia	Aplasia/Hypoplasia_of_the_phalanges_of_the_hand	Aplasia/Hypoplasia_of_the_phalanges_of_the_toes	Persistent_cloaca
Aplasia_cutis_congenita-intestinal_lymphangiectasia_syndrome	Myopia	Chorioretinal_coloboma	Lymphedema	Skull_defect	Lymphopenia	Abnormal_bleeding	Abnormality_of_coagulation	Malabsorption	Hypoproteinemia	Clinodactyly_of_the_5th_finger	Decreased_antibody_level_in_blood	Bilateral_single_transverse_palmar_creases	Abnormal_hair_quantity
Fibular_aplasia-ectrodactyly_syndrome	Split_hand	Premature_birth	Abnormality_of_the_ulna	Aplasia/Hypoplasia_of_the_fibula
Aplasia_cutis-myopia_syndrome	Abnormality_of_the_skeletal_system	Aplasia_cutis_congenita	Meningitis	Skull_defect	Abnormal_bleeding	Abnormality_of_coagulation	Congenital_nystagmus	Abnormality_of_retinal_pigmentation	High_myopia	Abnormality_of_nervous_system_morphology	Skin_ulcer
Ulnar_hypoplasia-split_foot_syndrome	Split_hand	Split_foot	Hypoplasia_of_the_ulna	Aplasia/Hypoplasia_of_the_radius
Lung_agenesis-heart_defect-thumb_anomalies_syndrome	Abnormality_of_the_ribs	Congenital_diaphragmatic_hernia	Abnormal_thumb_morphology	Preaxial_hand_polydactyly	Triphalangeal_thumb	Seizures	Death_in_infancy	Atrial_septal_defect	Patent_ductus_arteriosus	Abnormal_aortic_valve_morphology	Bicuspid_aortic_valve	Coarctation_of_aorta	Talipes_equinovalgus	Respiratory_insufficiency	Abnormal_lung_lobation	Ventriculomegaly	Spina_bifida	Vertebral_segmentation_defect	Tricuspid_regurgitation	Atrioventricular_canal_defect	Aplasia/Hypoplasia_of_the_lungs	Bilateral_single_transverse_palmar_creases	Proximal_placement_of_thumb	Short_thumb	Short_distal_phalanx_of_finger	Anomalous_pulmonary_venous_return	Abnormality_of_the_helix
AREDYLD_syndrome	Abnormality_of_the_ureter	Narrow_mouth	Mandibular_prognathia	Smooth_philtrum	Low-set_posteriorly_rotated_ears	Upslanted_palpebral_fissure	Abnormality_of_dental_eNAME	Brachydactyly	Intrauterine_growth_retardation	Splenomegaly	Sparse_body_hair	Hepatomegaly	Abnormality_of_pelvic_girdle_bone_morphology	Scoliosis	Short_stature	Cachexia	Craniofacial_hyperostosis	Refractory_anemia_with_ringed_sideroblasts	Abnormal_nasal_morphology	Type_II_diabetes_mellitus	Advanced_eruption_of_teeth	Abnormality_of_the_tragus	Aplasia/Hypoplasia_of_the_breasts	Lipoatrophy	Type_I_diabetes_mellitus	Aplasia/Hypoplasia_of_the_eyebrow
X-linked_mandibulofacial_dysostosis	Cryptorchidism	High_palate	Microcephaly	Epicanthus	Facial_asymmetry	Triangular_face	Micrognathia	Low-set_posteriorly_rotated_ears	Conductive_hearing_impairment	Sensorineural_hearing_impairment	Protruding_ear	Prominent_nasal_bridge	Webbed_neck	Downslanted_palpebral_fissures	Ptosis	Pectus_excavatum	Abnormal_mitral_valve_morphology	Pulmonic_stenosis	Short_stature	Abnormality_of_the_pulmonary_artery	Branchial_anomaly	Hypoplasia_of_the_zygomatic_bone	Asymmetric_growth	Aplasia/Hypoplasia_of_the_eyebrow
Arthrogryposis-like_hand_anomaly-sensorineural_deafness_syndrome	Sensorineural_hearing_impairment	Arachnodactyly	Joint_stiffness	Short_stature	Cachexia
Arthrogryposis_multiplex_congenita-whistling_face_syndrome	Narrow_mouth	Abnormal_palate_morphology	Pierre-Robin_sequence	Thin_vermilion_border	Full_cheeks	Whistling_appearance	Micrognathia	Hearing_abnormality	Abnormality_of_the_nose	Low-set_posteriorly_rotated_ears	Blepharophimosis	Adducted_thumb	Abnormal_fingernail_morphology	Seizures	Muscular_hypotonia	Joint_stiffness	Intrauterine_growth_retardation	Polyhydramnios	EEG_abnormality	Downturned_corners_of_mouth	Abnormality_of_the_shoulder	Short_stature	Chin_dimple	Severe_global_developmental_delay
Kuskokwim_syndrome	Abnormality_of_the_clavicle	Melanocytic_nevus	Gait_disturbance	Reduced_tendon_reflexes	Joint_stiffness	Talipes	Scoliosis	Abnormal_form_of_the_vertebral_bodies	Aplasia/Hypoplasia_of_the_patella	Aplasia/Hypoplasia_of_the_radius
Chylous_ascites	Glaucoma	Lymphedema	Subcutaneous_nodule	Ascites	Pancreatitis	Abnormal_intestine_morphology	Neoplasm
Atrioventricular_defect-blepharophimosis-radial_and_anal_defect_syndrome	Abnormality_of_the_genitourinary_system	Microcephaly	Micrognathia	Hearing_abnormality	Cupped_ear	Wide_nasal_bridge	Strabismus	Microphthalmia	Blepharophimosis	Upslanted_palpebral_fissure	Ocular_albinism	Myoclonus	Intrauterine_growth_retardation	Anteriorly_placed_anus	Abnormal_cardiac_septum_morphology	Anal_atresia	Hypoplasia_of_the_ulna	Absent_radius	Clinodactyly_of_the_5th_finger	Microtia	Aplasia/Hypoplasia_of_the_thumb	Aplasia_of_the_1st_metacarpal
Heart-hand_syndrome_type_2	Cryptorchidism	Abnormality_of_the_dentition	Abnormal_palate_morphology	Abnormality_of_the_clavicle	Brachydactyly	Hand_polydactyly	Abnormality_of_the_metacarpal_bones	Intellectual_disability	Joint_stiffness	Asymmetry_of_the_thorax	Low_posterior_hairline	Malformation_of_the_heart_and_great_vessels	Micromelia	Abnormality_of_the_ulna	Abnormality_of_the_wrist	Abnormality_of_the_shoulder	Abnormality_of_the_humerus	Aplasia/Hypoplasia_of_the_radius	Aplasia/Hypoplasia_of_the_thumb	Abnormality_of_the_elbow	Anterior_creases_of_earlobe	Short_4th_metacarpal	Short_5th_metacarpal	Arrhythmia	Hemiatrophy
Cardiomyopathy-cataract-hip_spine_disease_syndrome	Cataract	Hypertension	Platyspondyly	Joint_stiffness	Congestive_heart_failure	Hypertrophic_cardiomyopathy	Abnormal_heart_valve_morphology	Pulmonary_embolism	Skeletal_dysplasia	Osteoarthritis	Arterial_thrombosis	Abnormality_of_the_intervertebral_disk	Avascular_necrosis	Arrhythmia
Heart-hand_syndrome_type_3	Brachydactyly	Abnormality_of_the_metacarpal_bones	Short_toe	Short_middle_phalanx_of_finger	Sick_sinus_syndrome	Bundle_branch_block
Cardiofaciocutaneous_syndrome	Cryptorchidism	Hydronephrosis	Submucous_cleft_hard_palate	High_palate	Hydrocephalus	Macrocephaly	Long_face	Coarse_facial_features	Epicanthus	Full_cheeks	Hypertelorism	Long_philtrum	High_forehead	Low-set_posteriorly_rotated_ears	Thickened_helices	Macrotia	Anteverted_nares	Webbed_neck	Short_neck	Abnormality_of_the_eye	Strabismus	Downslanted_palpebral_fissures	Abnormal_eyelash_morphology	Abnormality_of_vision	Ptosis	Myopia	Long_palpebral_fissure	Nystagmus	Optic_atrophy	Pectus_excavatum	Dry_skin	Hyperkeratosis	Hyperextensible_skin	Palmoplantar_keratoderma	Multiple_lentigines	Lymphedema	Cavernous_hemangioma	Intellectual_disability	Muscular_hypotonia	Dysarthria	Global_developmental_delay	Failure_to_thrive_in_infancy	Redundant_skin	Premature_birth	Atrial_septal_defect	Hypertrophic_cardiomyopathy	Pulmonic_stenosis	Abnormal_heart_valve_morphology	Frontal_bossing
Heart_defect-tongue_hamartoma-polysyndactyly_syndrome	Cryptorchidism	2-3_finger_syndactyly	Patent_ductus_arteriosus	Subvalvular_aortic_stenosis	Hamartoma_of_tongue	Benign_neoplasm_of_the_central_nervous_system
Hyperkeratosis-hyperpigmentation_syndrome	Hyperkeratosis	Cutaneous_photosensitivity	Irregular_hyperpigmentation	Multiple_cafe-au-lait_spots	Papule
Pentalogy_of_Cantrell	Hypospadias	Renal_agenesis	Renal_dysplasia	Cleft_palate	Oral_cleft	Hydrocephalus	Abnormality_of_the_sternum	Congenital_diaphragmatic_hernia	Split_hand	Omphalocele	Ventricular_septal_defect	Atrial_septal_defect	Tetralogy_of_Fallot	Abnormal_pericardium_morphology	Polysplenia	Talipes	Encephalocele	Pulmonary_hypoplasia	Anencephaly	Malformation_of_the_heart_and_great_vessels	Scoliosis	Abnormality_of_tibia_morphology	Aplasia/Hypoplasia_of_the_radius	Absent_gallbladder	Non-midline_cleft_lip
Persistent_M√ºllerian_duct_syndrome	Inguinal_hernia	Cryptorchidism	Male_pseudohermaphroditism
Camurati-Engelmann_disease	Urinary_retention	Hypogonadism	Hearing_impairment	Glaucoma	Proptosis	Optic_atrophy	Carious_teeth	Delayed_eruption_of_teeth	Sensory_neuropathy	Delayed_puberty	Abnormality_of_the_vertebral_column	Abnormal_skull_morphology	Abnormal_diaphysis_morphology	Ataxia	Muscle_weakness	Limitation_of_joint_mobility	Slender_build	Hypertrophic_cardiomyopathy	Splenomegaly	Pes_planus	Leukopenia	Anemia	Abnormal_facial_shape	Frontal_bossing	Anorexia	Neurological_speech_impairment	Hepatomegaly	Waddling_gait	Abnormality_of_pelvic_girdle_bone_morphology	Scoliosis	Skeletal_dysplasia	Bone_pain	Coxa_valga	Kyphosis	Abnormality_of_the_radius	Abnormality_of_femur_morphology	Genu_valgum	Abnormality_of_tibia_morphology	Abnormality_of_the_ulna	Abnormality_of_the_humerus	Skeletal_muscle_atrophy	Hyperlordosis	Elevated_erythrocyte_sedimentation_rate	Cachexia	Craniofacial_osteosclerosis	Cortical_thickening_of_long_bone_diaphyses	Aplasia/Hypoplasia_of_the_radius	Abnormal_subcutaneous_fat_tissue_distribution	Optic_nerve_compression
Camptodactyly_syndrome_Guadalajara_type_1	Narrow_mouth	High_palate	Brachycephaly	Microcephaly	Narrow_face	Long_face	Epicanthus	Mandibular_prognathia	Low-set_posteriorly_rotated_ears	Anteverted_nares	Microcornea	Telecanthus	Blepharophimosis	Synophrys	Dental_malocclusion	Pectus_excavatum	Pectus_carinatum	Narrow_chest	Sacral_dimple	Melanocytic_nevus	Brachydactyly	Intellectual_disability	Seizures	Global_developmental_delay	Intrauterine_growth_retardation	Toe_syndactyly	Hallux_valgus	Short_toe	Spina_bifida	Highly_arched_eyebrow	Downturned_corners_of_mouth	Delayed_skeletal_maturation	Cubitus_valgus	Short_nose	Abnormal_form_of_the_vertebral_bodies	Scapular_winging	Short_stature	Depressed_nasal_bridge	Abnormality_of_dental_eruption	Microtia	Short_distal_phalanx_of_finger	Underdeveloped_supraorbital_ridges	Attached_earlobe	Open_bite	Midface_retrusion	Flat_face	Camptodactyly_of_finger
Camptodactyly_syndrome_Guadalajara_type_2	Labial_hypoplasia	Microcephaly	Pectus_excavatum	Intrauterine_growth_retardation	Talipes_equinovarus	Short_2nd_toe	Hip_dislocation	Patellar_hypoplasia	Short_stature	Cuboid-shaped_vertebral_bodies	Short_3rd_toe	Short_5th_toe	Camptodactyly_of_finger
Camptodactyly-taurinuria_syndrome	Camptodactyly_of_toe	Increased_urinary_taurine	Aminoaciduria	Camptodactyly_of_finger
Camptodactyly-joint_contractures-facial_skeletal_defects_syndrome	Narrow_mouth	Narrow_palate	Facial_asymmetry	Micrognathia	High_forehead	Strabismus	Ptosis	Proptosis	Joint_stiffness	Intrauterine_growth_retardation	Low_posterior_hairline	Abnormality_of_calvarial_morphology	Scoliosis	Abnormality_of_the_hip_bone	Hyperlordosis	Vertebral_segmentation_defect	Short_stature	Biparietal_narrowing	Synostosis_of_carpal_bones	Finger_syndactyly	Camptodactyly_of_finger	Asymmetric_growth
Camptodactyly-fibrous_tissue_hyperplasia-skeletal_dysplasia_syndrome	Coarse_facial_features	Mask-like_facies	Wide_nose	Arachnodactyly	Intellectual_disability_mild	Patent_ductus_arteriosus	Scoliosis	Camptodactyly_of_finger
Camptobrachydactyly	Septate_vagina	Brachydactyly	Abnormal_fingernail_morphology	Toe_syndactyly	Hypoplastic_toenails	Finger_syndactyly	Ulnar_deviation_of_finger	Aplasia/Hypoplasia_of_the_thumb	Camptodactyly_of_finger
Night_blindness-skeletal_anomalies-dysmorphism_syndrome	Abnormal_palate_morphology	Malar_flattening	Retrognathia	Epicanthus	Abnormality_of_the_nose	Low-set_posteriorly_rotated_ears	Downslanted_palpebral_fissures	Ptosis	Abnormal_electroretinogram	Myopia	Nyctalopia	Synophrys	Carious_teeth	Heterochromia_iridis	Brachydactyly	Hypertonia	Scoliosis	Clinodactyly_of_the_5th_finger	Joint_hyperflexibility	Abnormality_of_retinal_pigmentation	Abnormal_retinal_vascular_morphology	Cognitive_impairment	Down-sloping_shoulders
Cerebrocostomandibular_syndrome	Cleft_palate	Micrognathia	Bell-shaped_thorax	Neonatal_respiratory_distress	Posterior_rib_gap	Glossoptosis	Conductive_hearing_impairment	Atresia_of_the_external_auditory_canal	Intellectual_disability	Intrauterine_growth_retardation	Death_in_infancy	Tracheomalacia	Kyphosis	Short_stature	Feeding_difficulties	Multicystic_kidney_dysplasia	Microcephaly	Webbed_neck	Ventricular_septal_defect	Porencephaly	Hydranencephaly	Spina_bifida	Meningocele	Myelomeningocele	Cerebral_calcification	Clinodactyly_of_the_5th_finger	Short_hard_palate
Catel-Manzke_syndrome	Glossoptosis	Cleft_palate	Malar_flattening	Full_cheeks	Hypertelorism	Micrognathia	Low-set_posteriorly_rotated_ears	Chronic_otitis_media	Pectus_excavatum	Joint_stiffness	Failure_to_thrive	Ventricular_septal_defect	Atrial_septal_defect	Ventriculomegaly	Highly_arched_eyebrow	Malformation_of_the_heart_and_great_vessels	Scoliosis	Clinodactyly_of_the_5th_finger	Short_stature	Joint_hyperflexibility	Abnormality_of_epiphysis_morphology	Radial_deviation_of_the_2nd_finger	Oral_synechia	Metatarsus_valgus	Camptodactyly_of_finger
Cortical_blindness-intellectual_disability-polydactyly_syndrome	Abnormal_palate_morphology	Microretrognathia	Long_philtrum	Abnormality_of_visual_evoked_potentials	Postaxial_hand_polydactyly	Intellectual_disability	Hypertonia	Hyperreflexia	Recurrent_respiratory_infections	Short_nose	Short_stature	Cachexia	Prominent_forehead	Cerebral_visual_impairment
Cataract-intellectual_disability-anal_atresia-urinary_defects_syndrome	Cryptorchidism	Hypospadias	Abnormal_palate_morphology	Strabismus	Cataract	Nystagmus	Intellectual_disability	Tetralogy_of_Fallot	Anal_atresia	Genu_valgum	Aplasia/Hypoplasia_of_the_lens	Hypoplasia_of_penis
Cataract-intellectual_disability-hypogonadism_syndrome	Cryptorchidism	Hypogonadotrophic_hypogonadism	High_palate	Furrowed_tongue	Everted_lower_lip_vermilion	Brachycephaly	Microcephaly	Malar_flattening	Short_philtrum	Micrognathia	Low-set_posteriorly_rotated_ears	Cataract	Hypotelorism	Misalignment_of_teeth	Abnormality_of_the_hand	Intellectual_disability	Cerebral_cortical_atrophy	Low_posterior_hairline	Scoliosis	Hyperlordosis	Short_stature	Depressed_nasal_bridge	Abnormal_dermatoglyphics	Prematurely_aged_appearance	Abnormal_toenail_morphology	Feeding_difficulties_in_infancy	Ulnar_deviation_of_finger	Abnormality_of_the_antihelix	Abnormal_distal_phalanx_morphology_of_finger	Midface_retrusion
Cataract-microcornea_syndrome	Microcornea	Cataract	Myopia	Iris_coloboma	Nystagmus	Corneal_dystrophy	Corneal_opacity
Cataract-nephropathy-encephalopathy_syndrome	Renal_tubular_dysfunction	Cataract	Nystagmus	Intellectual_disability	Seizures	Short_stature
Cataract-hypertrichosis-intellectual_disability_syndrome	Abnormal_palate_morphology	Developmental_cataract	Microdontia	Pectus_excavatum	Intellectual_disability	Low_posterior_hairline	Generalized_hirsutism	Depressed_nasal_bridge
Cataract-aberrant_oral_frenula-growth_delay_syndrome	Inguinal_hernia	Accessory_oral_frenulum	Epicanthus	Low-set_posteriorly_rotated_ears	Ptosis	Cataract	Cavernous_hemangioma	Umbilical_hernia	Short_stature	High_hypermetropia
Hereditary_hyperferritinemia-cataract_syndrome	Cataract	Abnormality_of_metabolism/homeostasis
Autosomal_recessive_palmoplantar_keratoderma_and_congenital_alopecia	Visual_impairment	Cataract	Palmoplantar_keratoderma	Atypical_scarring_of_skin	Joint_stiffness	Subcutaneous_nodule	Alopecia_totalis	Aplasia/Hypoplasia_of_the_skin	Nail_dystrophy	Lack_of_skin_elasticity
Cataract-ataxia-deafness_syndrome	Sensorineural_hearing_impairment	Visual_impairment	Developmental_cataract	Nystagmus	Decreased_nerve_conduction_velocity	Ataxia	Intellectual_disability_mild	Hypertonia	Areflexia	Tremor	Short_stature	Adult_onset_sensorineural_hearing_impairment	Peripheral_neuropathy
Congenital_heart_defect-round_face-developmental_delay_syndrome	Hypospadias	Narrow_mouth	Abnormal_oral_cavity_morphology	Round_face	Depressed_nasal_ridge	Anteverted_nares	Malformation_of_the_heart_and_great_vessels	Short_nose	Short_stature	Hypopigmentation_of_hair	Generalized_hyperpigmentation	Abnormal_dermatoglyphics
Carnosinase_deficiency	Intellectual_disability	Generalized_myoclonic_seizures	EEG_abnormality	Developmental_regression	Carnosinuria
Boomerang_dysplasia	Cryptorchidism	Narrow_chest	Growth_hormone_deficiency	Abnormality_of_the_metacarpal_bones	Omphalocele	Polyhydramnios	Hydrops_fetalis	Abnormality_of_the_radius	Abnormality_of_femur_morphology	Micromelia	Abnormality_of_tibia_morphology	Abnormality_of_the_ulna	Abnormality_of_the_humerus	Finger_syndactyly	Aplasia/Hypoplasia_of_the_fibula	Aplasia/Hypoplasia_of_the_lungs	Severe_short-limb_dwarfism	Aplasia/Hypoplasia_of_the_abdominal_wall_musculature	Abnormal_bone_ossification	Abnormally_ossified_vertebrae	Poorly_ossified_vertebrae
B√∂√∂k_syndrome	Abnormality_of_the_dentition	Narrow_palate	Abnormal_eyebrow_morphology	Hypodontia	Hyperhidrosis	Hypoplastic_fingernail	Premature_graying_of_hair	Abnormal_dermatoglyphics	Bilateral_single_transverse_palmar_creases	Small_hand
Tricho-retino-dento-digital_syndrome	Abnormality_of_the_dentition	Oligodontia	Hypotrichosis	Juvenile_cataract	Abnormality_of_the_hand	Brachydactyly	Abnormality_of_retinal_pigmentation	Short_5th_metacarpal	Increased_number_of_teeth	Uncombable_hair
Borjeson-Forssman-Lehmann_syndrome	Cryptorchidism	Scrotal_hypoplasia	Hypogonadism	Oral_cleft	Microcephaly	Macrocephaly	Coarse_facial_features	Prominent_supraorbital_ridges	Hearing_impairment	Deeply_set_eye	Ptosis	Cataract	Thick_eyebrow	Blepharophimosis	Nystagmus	Gynecomastia	Tapered_finger	Intellectual_disability	Seizures	Muscular_hypotonia	Broad_foot	Short_toe	Camptodactyly_of_toe	Truncal_obesity	Skeletal_muscle_atrophy	Abnormality_of_the_hip_bone	Short_stature	Joint_hyperflexibility	Sparse_hair	Decreased_testicular_size	Hypoplasia_of_penis	Feeding_difficulties_in_infancy	Large_earlobe	Peripheral_neuropathy
Ascher_syndrome	Abnormality_of_upper_lip	High_palate	Hypertelorism	Wide_nose	Abnormal_eyelid_morphology	Visual_impairment	Ptosis	Blepharophimosis	Hypothyroidism	Goiter	Deviation_of_finger	Upper_eyelid_edema
Bonnemann-Meinecke-Reich_syndrome	Microcephaly	Dolichocephaly	Micrognathia	Visual_impairment	Growth_hormone_deficiency	Intellectual_disability_mild	Spasticity	Ventriculomegaly	EEG_abnormality	Cerebral_calcification	Short_stature
Blepharoptosis-myopia-ectopia_lentis_syndrome	Prominent_occiput	Glaucoma	Ptosis	Myopia	Iris_coloboma	Ectopia_lentis	Abnormality_of_retinal_pigmentation	Abnormality_of_the_helix	Palpebral_edema	Fingernail_dysplasia
Bencze_syndrome	Submucous_cleft_hard_palate	Facial_asymmetry	Strabismus	Telecanthus	Upslanted_palpebral_fissure	Amblyopia	Extension_of_hair_growth_on_temples_to_lateral_eyebrow	Open_bite
Metaphyseal_acroscyphodysplasia	Epicanthus	Hypertelorism	Wide_nasal_bridge	Depressed_nasal_ridge	Telecanthus	Abnormal_diaphysis_morphology	Abnormality_of_the_metaphysis	Brachydactyly	Intellectual_disability	Joint_dislocation	Short_toe	Frontal_bossing	Scoliosis	Coxa_valga	Abnormality_of_femur_morphology	Genu_varum	Micromelia	Severe_short_stature	Accelerated_skeletal_maturation	Cone-shaped_metacarpal_epiphyses	Bowing_of_the_long_bones	Cone-shaped_epiphysis	Prominent_forehead	Flat_face
Blepharonasofacial_malformation_syndrome	Inguinal_hernia	Cryptorchidism	Cleft_palate	Epicanthus	Mask-like_facies	Long_philtrum	Hearing_impairment	Underdeveloped_nasal_alae	Wide_nasal_bridge	Wide_nose	Abnormal_eyelash_morphology	Telecanthus	Blepharophimosis	Lacrimation_abnormality	Optic_atrophy	Thickened_skin	Intellectual_disability	Torsion_dystonia	Hyperreflexia	Redundant_skin	Abnormality_of_the_voice	Low_posterior_hairline	Sparse_lateral_eyebrow	Joint_hyperflexibility	Finger_syndactyly	External_ear_malformation	Reduced_number_of_teeth	Non-midline_cleft_lip
Maxillonasal_dysplasia	Cleft_palate	Mandibular_prognathia	Hypoplasia_of_the_maxilla	Depressed_nasal_ridge	Microdontia	Striae_distensae	Short_columella	Scoliosis	Short_nose	Patchy_distortion_of_vertebrae	Depressed_nasal_bridge	Abnormality_of_the_nares	Vertebral_clefting	Reduced_number_of_teeth	Short_distal_phalanx_of_finger	Aplasia/Hypoplasia_of_the_distal_phalanges_of_the_toes	Open_bite	Midface_retrusion	Low_levels_of_vitamin_K	Flat_face
Auriculoosteodysplasia	Macrotia	Abnormality_of_the_clavicle	Abnormality_of_the_metacarpal_bones	Hip_dysplasia	Abnormality_of_the_wrist	Elbow_dislocation	Short_stature	Aplasia/Hypoplasia_of_the_radius	Aplasia/Hypoplasia_of_the_earlobes	Attached_earlobe
Congenital_contractural_arachnodactyly	High_palate	Ectopia_lentis	Arachnodactyly	Flexion_contracture	Joint_stiffness	Disproportionate_tall_stature	Slender_build	Mitral_valve_prolapse	Aortic_dilatation	Duodenal_atresia	Malformation_of_the_heart_and_great_vessels	Intestinal_malrotation	Tracheoesophageal_fistula	Scoliosis	Congenital_contracture	Arthrogryposis_multiplex_congenita	Abnormality_of_the_musculature	Congenital_kyphoscoliosis	Abnormally_folded_helix	Crumpled_ear	Camptodactyly_of_finger
Beemer-Ertbruggen_syndrome	Cryptorchidism	Ambiguous_genitalia	Micrognathia	Low-set_posteriorly_rotated_ears	Bulbous_nose	Wide_nasal_bridge	Muscular_hypotonia	Communicating_hydrocephalus	Thrombocytopenia	Deep_philtrum	Respiratory_insufficiency	Malformation_of_the_heart_and_great_vessels	Increased_bone_mineral_density
Distal_limb_deficiencies-micrognathia_syndrome	Cryptorchidism	Renal_insufficiency	Renal_hypoplasia	Proteinuria	Narrow_mouth	Microglossia	Cleft_palate	High_palate	Macrocephaly	Microretrognathia	Hypoplasia_of_the_maxilla	Low-set_posteriorly_rotated_ears	Conductive_hearing_impairment	Sensorineural_hearing_impairment	Prominent_nasal_bridge	Myopia	Nystagmus	Microdontia	Abnormality_of_the_metacarpal_bones	Split_foot	Intellectual_disability_moderate	Abnormality_of_chromosome_segregation	Abnormality_of_the_ulna	Abnormality_of_the_wrist	Abnormality_of_the_ankles	Short_stature	Aplasia/Hypoplasia_of_the_radius	Tarsal_synostosis	Aplasia/Hypoplasia_of_the_thumb	Oligodactyly
Infantile_choroidocerebral_calcification_syndrome	Strabismus	Seizures	Hyperreflexia	Cerebral_calcification	Intellectual_disability_severe
Symmetrical_thalamic_calcifications	Ataxia	Spasticity	Hypertonia	Reduced_tendon_reflexes	Weak_cry	Respiratory_insufficiency	EEG_abnormality	Cerebral_calcification	Cognitive_impairment	Microcephaly	Seizures	Failure_to_thrive	Polyhydramnios	Abnormality_of_the_voice	Abnormality_of_neuronal_migration	Arrhythmia
Campomelia_Cumming_type	Multicystic_kidney_dysplasia	Cleft_palate	Dolichocephaly	Coarse_facial_features	Cystic_hygroma	Abnormality_of_the_thorax	Abnormality_of_the_ribs	Lymphedema	Brachydactyly	Death_in_infancy	Oligohydramnios	Abnormality_of_the_pancreas	Pancreatic_cysts	Hydrops_fetalis	Hepatomegaly	Abnormal_intestine_morphology	Malformation_of_the_heart_and_great_vessels	Skeletal_dysplasia	Myelodysplasia	Micromelia	Multiple_renal_cysts	Bowing_of_the_long_bones	Prematurely_aged_appearance	Aplasia/Hypoplasia_affecting_the_eye	Skin_dimple	Abnormally_ossified_vertebrae	Clubbing_of_toes
Lambert_syndrome	Inguinal_hernia	Hypospadias	Wide_mouth	Malar_flattening	Preauricular_skin_tag	Jaundice	Intellectual_disability	Muscular_hypotonia	Cholestasis	Intrauterine_growth_retardation	Failure_to_thrive_in_infancy	Ventricular_septal_defect	Decreased_antibody_level_in_blood	Intrahepatic_biliary_atresia	Aplasia/Hypoplasia_of_the_cerebellum	Branchial_anomaly
Branchio-oculo-facial_syndrome	Multicystic_kidney_dysplasia	Renal_agenesis	Hydronephrosis	Oral_cleft	High_palate	Everted_lower_lip_vermilion	Dolichocephaly	Low-set_posteriorly_rotated_ears	Abnormality_of_the_pinna	Conductive_hearing_impairment	Wide_nasal_bridge	Broad_nasal_tip	Microcornea	Strabismus	Ptosis	Cataract	Nasolacrimal_duct_obstruction	Upslanted_palpebral_fissure	Coloboma	Iris_coloboma	Microdontia	Atypical_scarring_of_skin	Hemangioma	Preaxial_hand_polydactyly	Intrauterine_growth_retardation	Nasal_speech	Deep_philtrum	Neurological_speech_impairment	Premature_graying_of_hair	Short_stature	Postauricular_pit	Preauricular_pit	Supraauricular_pit	Reduced_number_of_teeth	Upper_lip_pit	Non-midline_cleft_lip	Fingernail_dysplasia
Autosomal_dominant_popliteal_pterygium_syndrome	Cryptorchidism	Scrotal_hypoplasia	Bifid_scrotum	Hypoplastic_labia_majora	Ambiguous_genitalia	Cleft_palate	Thin_upper_lip_vermilion	Micrognathia	Choanal_atresia	Abnormality_of_the_ribs	Split_hand	Specific_learning_disability	Joint_stiffness	Abnormality_of_the_nail	Toe_syndactyly	Generalized_hirsutism	Scoliosis	Finger_syndactyly	Nonketotic_hyperglycinemia	Fibrous_syngnathia	Ankyloblepharon	Popliteal_pterygium	Lip_pit	Non-midline_cleft_lip
Feingold_syndrome	Oral_cleft	Microcephaly	Micrognathia	Sensorineural_hearing_impairment	Anteverted_nares	Brachydactyly	Intellectual_disability	Patent_ductus_arteriosus	Annular_pancreas	Abnormality_of_the_spleen	Toe_syndactyly	Hallux_valgus	Esophageal_atresia	Duodenal_atresia	Abnormal_form_of_the_vertebral_bodies	Clinodactyly_of_the_5th_finger	Short_stature	Depressed_nasal_bridge	External_ear_malformation	Deviation_of_the_2nd_finger	Short_palpebral_fissure
Brachydactyly-preaxial_hallux_varus_syndrome	Abnormal_palate_morphology	Micrognathia	Wide_nasal_bridge	Thick_eyebrow	Synophrys	Brachydactyly	Preaxial_hand_polydactyly	Abnormal_fingernail_morphology	Frontal_bossing	Radial_club_hand	Short_metacarpal	Short_metatarsal	Broad_thumb
Brachymorphism-onychodysplasia-dysphalangism_syndrome	Inguinal_hernia	Wide_mouth	Brachycephaly	Microcephaly	Malar_flattening	Coarse_facial_features	Epicanthus	Pointed_chin	Triangular_face	Long_philtrum	High_forehead	Wide_nasal_bridge	Prominent_nose	Strabismus	Thick_eyebrow	Brachydactyly	Intellectual_disability_mild	Intrauterine_growth_retardation	Umbilical_hernia	Atrial_septal_defect	Abnormal_mitral_valve_morphology	Hypoplastic_toenails	Absent_toenail	Hypoplastic_fingernail	Absent_fingernail	Short_distal_phalanx_of_toe	Frontal_bossing	Abnormality_of_the_respiratory_system	Generalized_hirsutism	Delayed_skeletal_maturation	Clinodactyly_of_the_5th_finger	Short_stature	Biparietal_narrowing	Hypoplastic_fifth_fingernail	Symphalangism_affecting_the_phalanges_of_the_hand	High_anterior_hairline	Toenail_dysplasia	Fingernail_dysplasia
Brachytelephalangy-dysmorphism-Kallmann_syndrome	Hypogonadotrophic_hypogonadism	Bifid_scrotum	Thin_upper_lip_vermilion	Hypertelorism	Broad_forehead	Anosmia	Telecanthus	Synophrys	Hypopigmented_skin_patches	Brachydactyly	Abnormality_of_the_metacarpal_bones	Joint_stiffness	Genu_valgum	Short_nose	Abnormality_of_the_nares	Hypoplasia_of_penis	Short_distal_phalanx_of_finger	Aplastic/hypoplastic_toenail	Hypoplasia_of_the_zygomatic_bone
Bowen-Conradi_syndrome	Cryptorchidism	Oral_cleft	Microcephaly	Sloping_forehead	Micrognathia	Prominent_nose	Seizures	Joint_stiffness	Death_in_infancy	Rocker_bottom_foot	Abnormal_lung_lobation	Ventriculomegaly	Malformation_of_the_heart_and_great_vessels	Clinodactyly_of_the_5th_finger	Short_stature	Severe_intrauterine_growth_retardation	Severe_postnatal_growth_retardation	Feeding_difficulties_in_infancy	Severe_global_developmental_delay	Camptodactyly_of_finger
Brachydactyly-elbow_wrist_dysplasia_syndrome	Macrocephaly	Brachydactyly	Abnormal_fingernail_morphology	Joint_stiffness	Abnormality_of_the_ulna	Elbow_dislocation	Abnormality_of_the_humerus	Clinodactyly_of_the_5th_finger	Synostosis_of_carpal_bones	Aplasia/Hypoplasia_of_the_radius	Abnormal_distal_phalanx_morphology_of_finger
Brachydactyly-arterial_hypertension_syndrome	Hypertension	Brachydactyly	Short_stature	Short_phalanx_of_finger	Short_metacarpal
Craniofrontonasal_dysplasia	Hypospadias	Shawl_scrotum	Abnormality_of_the_dentition	Oral_cleft	High_palate	Brachycephaly	Microcephaly	Hypertelorism	Facial_asymmetry	Widow's_peak	Sensorineural_hearing_impairment	Wide_nasal_bridge	Depressed_nasal_ridge	Thickened_nuchal_skin_fold	Downslanted_palpebral_fissures	Pectus_excavatum	Congenital_diaphragmatic_hernia	Abnormality_of_the_clavicle	Sprengel_anomaly	Brachydactyly	Hand_polydactyly	Intellectual_disability	Muscular_hypotonia	Plagiocephaly	Craniosynostosis	Sandal_gap	Frontal_bossing	Hypoplasia_of_the_corpus_callosum	Low_posterior_hairline	Woolly_hair	Scoliosis	Midline_defect_of_the_nose	Clinodactyly_of_the_5th_finger	Joint_hyperflexibility	Finger_syndactyly	Congenital_pseudoarthrosis_of_the_clavicle	Aplasia/Hypoplasia_of_the_nipples	Ridged_fingernail	Broad_hallux_phalanx	Abnormality_of_hair_texture	Camptodactyly_of_finger	Down-sloping_shoulders
SPECC1L-related_hypertelorism_syndrome	Cryptorchidism	Shawl_scrotum	Ectopic_kidney	Oral_cleft	Everted_lower_lip_vermilion	Thin_vermilion_border	Brachycephaly	Round_face	Hypertelorism	Long_philtrum	Widow's_peak	Low-set_ears	Prominent_nasal_bridge	Wide_nasal_bridge	Strabismus	Downslanted_palpebral_fissures	Ptosis	Proptosis	Thick_eyebrow	Pectus_excavatum	Brachydactyly	Umbilical_hernia	Omphalocele	Ventricular_septal_defect	Atrial_septal_defect	Tetralogy_of_Fallot	Patent_ductus_arteriosus	Short_toe	Highly_arched_eyebrow	Short_nose	Clinodactyly_of_the_5th_finger	Preauricular_pit	Finger_syndactyly	Advanced_eruption_of_teeth	Female_pseudohermaphroditism	Chin_dimple	Abnormality_of_the_helix	Prominent_forehead	Arrhythmia
Hypertrichotic_osteochondrodysplasia_Cantu_type	Wide_mouth	Macrocephaly	Coarse_facial_features	Epicanthus	Low_anterior_hairline	Prominent_supraorbital_ridges	Long_philtrum	Wide_nasal_bridge	Anteverted_nares	Short_neck	Long_eyelashes	Thick_eyebrow	Narrow_chest	Broad_ribs	Platyspondyly	Osteoporosis	Abnormality_of_the_metaphysis	Intellectual_disability_mild	Umbilical_hernia	Hypertrophic_cardiomyopathy	Cardiomegaly	Patent_ductus_arteriosus	Abnormal_heart_valve_morphology	Deep_plantar_creases	Low_posterior_hairline	Generalized_hirsutism	Skeletal_dysplasia	Coxa_valga	Delayed_skeletal_maturation	Ovoid_vertebral_bodies	Cuboid-shaped_vertebral_bodies	Accelerated_skeletal_maturation	Finger_syndactyly	Curly_eyelashes	Short_distal_phalanx_of_finger	Broad_hallux_phalanx	Short_hallux	Thick_vermilion_border
Craniofacial_dyssynostosis	Abnormal_oral_cavity_morphology	Open_mouth	Hydrocephalus	Macrocephaly	Dolichocephaly	Epicanthus	Hypertelorism	Short_philtrum	Facial_asymmetry	Micrognathia	Low-set_ears	Stenosis_of_the_external_auditory_canal	Underdeveloped_nasal_alae	Wide_nasal_bridge	Short_neck	Strabismus	Downslanted_palpebral_fissures	Nystagmus	Sacral_dimple	Nevus_flammeus	Craniosynostosis	Umbilical_hernia	Patent_ductus_arteriosus	Frontal_bossing	Hypoplasia_of_the_corpus_callosum	Clinodactyly_of_the_5th_finger	Short_stature	Underdeveloped_supraorbital_ridges	Severe_global_developmental_delay
Craniotelencephalic_dysplasia	Hydrocephalus	Microcephaly	Low-set_posteriorly_rotated_ears	Visual_impairment	Microphthalmia	Optic_atrophy	Global_developmental_delay	Agenesis_of_corpus_callosum	Cerebellar_hypoplasia	Lissencephaly	Craniosynostosis	Frontal_bossing	Arrhinencephaly	Frontal_encephalocele	Septo-optic_dysplasia
Craniosynostosis_Philadelphia_type	Long_palpebral_fissure	Craniosynostosis	Finger_syndactyly
Cranio-osteoarthropathy	Large_fontanelles	Abnormal_skull_morphology	Eczema	Mottled_pigmentation	Arthritis	Joint_swelling	Joint_stiffness	Osteoarthritis	Abnormality_of_the_knee	Arthralgia	Abnormality_of_tibia_morphology	Abnormal_cortical_bone_morphology	Deviation_of_finger	Clubbing_of_toes
Craniometaphyseal_dysplasia	Hypertelorism	Conductive_hearing_impairment	Sensorineural_hearing_impairment	Wide_nasal_bridge	Visual_impairment	Telecanthus	Abnormality_of_the_metaphysis	Abnormal_cranial_nerve_morphology	Skeletal_dysplasia	Craniofacial_hyperostosis	Depressed_nasal_bridge	Facial_palsy	Osteopetrosis
Coxopodopatellar_syndrome	Hip_dysplasia	Abnormality_of_pelvic_girdle_bone_morphology	Abnormality_of_the_knee	Abnormality_of_epiphysis_morphology	Aplasia/Hypoplasia_of_the_patella
Coxoauricular_syndrome	Hearing_impairment	Atresia_of_the_external_auditory_canal	Abnormality_of_pelvic_girdle_bone_morphology	Abnormality_of_femur_morphology	Hip_dislocation	Micromelia	Short_stature	Reduced_bone_mineral_density	Microtia
Autosomal_recessive_Robinow_syndrome	Multicystic_kidney_dysplasia	Inguinal_hernia	Cryptorchidism	Hydronephrosis	Wide_mouth	Abnormality_of_the_dentition	Abnormal_palate_morphology	Oral_cleft	Gingival_overgrowth	Macrocephaly	Epicanthus	Hypertelorism	Short_philtrum	Long_philtrum	Micrognathia	Hearing_impairment	Low-set_posteriorly_rotated_ears	Chronic_otitis_media	Wide_nasal_bridge	Anteverted_nares	Short_neck	Strabismus	Downslanted_palpebral_fissures	Ptosis	Proptosis	Long_eyelashes	Upslanted_palpebral_fissure	Blue_sclerae	Long_palpebral_fissure	Hypodontia	Pectus_excavatum	Pectus_carinatum	Rib_fusion	Sacral_dimple	Nevus_flammeus	Brachydactyly	Split_hand	Intellectual_disability	Death_in_infancy	Umbilical_hernia	Alopecia	Ventricular_septal_defect	Atrial_septal_defect	Tetralogy_of_Fallot	Abnormal_pulmonary_valve_morphology	Abnormal_aortic_morphology	Abnormal_tricuspid_valve_morphology	Toe_syndactyly	Sandal_gap
Thin_ribs-tubular_bones-dysmorphism_syndrome	Abnormal_palate_morphology	Macrocephaly	Low-set_posteriorly_rotated_ears	Abnormality_of_the_ribs	Intrauterine_growth_retardation	Frontal_bossing	Abnormality_of_pelvic_girdle_bone_morphology	Slender_long_bone
Cranioectodermal_dysplasia	Abnormality_of_the_dentition	Everted_lower_lip_vermilion	Dolichocephaly	Prominent_occiput	Epicanthus	Anteverted_nares	Myopia	Hypotelorism	Nystagmus	Hypodontia	Taurodontia	Abnormality_of_dental_eNAME	Microdontia	Pectus_excavatum	Narrow_chest	Osteoporosis	Abnormal_diaphysis_morphology	Abnormality_of_the_metaphysis	Brachydactyly	Abnormal_fingernail_morphology	Craniosynostosis	Frontal_bossing	Clinodactyly_of_the_5th_finger	Joint_hyperflexibility	Finger_syndactyly	Sparse_hair	Abnormal_toenail_morphology	High_hypermetropia	Rhizomelia	Short_distal_phalanx_of_finger
Craniodigital-intellectual_disability_syndrome	Brachycephaly	Micrognathia	Narrow_nasal_bridge	Long_eyelashes	Thick_eyebrow	Intellectual_disability	Generalized_hirsutism	Short_nose	Spina_bifida_occulta	Short_stature	Finger_syndactyly	Abnormal_dermatoglyphics	Abnormal_hair_pattern	Thick_hair
Craniodiaphyseal_dysplasia	Macrocephaly	Coarse_facial_features	Stenosis_of_the_external_auditory_canal	Conductive_hearing_impairment	Wide_nasal_bridge	Optic_atrophy	Abnormality_of_the_ribs	Intellectual_disability	Frontal_bossing	Short_stature	Craniofacial_hyperostosis	Diaphyseal_thickening	Depressed_nasal_bridge
Crane-Heise_syndrome	Cryptorchidism	Cleft_palate	Hypertelorism	Micrognathia	Low-set_posteriorly_rotated_ears	Anteverted_nares	Hypoplastic_scapulae	Joint_stiffness	Intrauterine_growth_retardation	Talipes_equinovarus	Toe_syndactyly	Ventriculomegaly	Decreased_skull_ossification	Depressed_nasal_bridge	Finger_syndactyly	Aplastic_clavicles	Aplasia/Hypoplasia_of_the_corpus_callosum	Hypoplasia_of_penis	Short_distal_phalanx_of_finger	Abnormally_ossified_vertebrae
Dacryocystitis-osteopoikilosis_syndrome	Dacryocystitis	Lacrimation_abnormality	Osteopoikilosis	Increased_bone_mineral_density
Dahlberg-Borer-Newcomer_syndrome	Renal_insufficiency	Nephropathy	Wide_nasal_bridge	Telecanthus	Cataract	Hypothyroidism	Hypoparathyroidism	Hypohidrosis	Lymphedema	Thickened_skin	Brachydactyly	Mitral_valve_prolapse	Anonychia	Generalized_hirsutism	Hypocalcemia	Short_stature	Short_distal_phalanx_of_finger
Curry-Jones_syndrome	Hypertelorism	Facial_asymmetry	Microphthalmia	Optic_nerve_coloboma	Iris_coloboma	Hypopigmented_skin_patches	Preaxial_hand_polydactyly	Intellectual_disability	Agenesis_of_corpus_callosum	Craniosynostosis	Toe_syndactyly	Foot_polydactyly	Ventriculomegaly	Generalized_hirsutism	Intestinal_malrotation	Finger_syndactyly	Aplasia/Hypoplasia_of_the_skin	Abnormality_of_thumb_phalanx	Broad_thumb
Cutis_gyrata-acanthosis_nigricans-craniosynostosis_syndrome	Cryptorchidism	Bifid_scrotum	Narrow_mouth	Cleft_palate	Narrow_palate	Hydrocephalus	Turricephaly	Dolichocephaly	Abnormality_of_the_face	Malar_flattening	Hypertelorism	Hearing_abnormality	Thickened_helices	Macrotia	Choanal_atresia	Anteverted_nares	Abnormality_of_the_eye	Downslanted_palpebral_fissures	Abnormality_of_vision	Ptosis	Proptosis	Optic_atrophy	Hypertension	Abnormal_skull_morphology	Acanthosis_nigricans	Palmoplantar_keratoderma	Melanocytic_nevus	Craniosynostosis	Subcutaneous_nodule	Umbilical_hernia	Anteriorly_placed_anus	Abnormality_of_the_nail	Abnormality_of_the_pancreas	Respiratory_distress	Cloverleaf_skull	Prominent_scrotal_raphe	Preauricular_skin_furrow	Depressed_nasal_bridge	Palmoplantar_cutis_gyrata	Reduced_number_of_teeth	Aplasia/Hypoplasia_of_the_earlobes	Hypoplasia_of_the_zygomatic_bone	Midface_retrusion	Visceral_angiomatosis
Knobloch_syndrome	Vesicoureteral_reflux	Hydrocephalus	Epicanthus	Strabismus	Cataract	Progressive_visual_loss	Retinal_detachment	Myopia	Visual_loss	Macular_degeneration	Nystagmus	Vitreoretinal_degeneration	Ectopia_lentis	Seizures	Skull_defect	Abnormality_of_the_hair	Patent_ductus_arteriosus	Dextrocardia	Pyloric_stenosis	Occipital_encephalocele	Abnormal_vitreous_humor_morphology	Depressed_nasal_bridge	Joint_hyperflexibility	Midface_retrusion	Bifid_ureter	Lymphangioma
Familial_benign_copper_deficiency	Wide_nasal_bridge	Acne	Seizures	Muscular_hypotonia	Anemia	Deep_philtrum	Early_balding	Short_stature	Diaphyseal_thickening	Aplasia/Hypoplasia_of_the_fovea	Abnormality_of_immune_system_physiology	Decreased_circulating_copper_concentration
Dandy-Walker_malformation-postaxial_polydactyly_syndrome	Postaxial_hand_polydactyly	Dandy-Walker_malformation
X-linked_intellectual_disability-Dandy-Walker_malformation-basal_ganglia_disease-seizures_syndrome	Inguinal_hernia	Cryptorchidism	Macrocephaly	Strabismus	Ventriculomegaly	Cerebral_cortical_atrophy	Aplasia/Hypoplasia_of_the_cerebellum
Craniosynostosis-fibular_aplasia_syndrome	Inguinal_hernia	Cryptorchidism	Abnormal_palate_morphology	Cleft_palate	Large_fontanelles	Brachycephaly	Microcephaly	Low-set_posteriorly_rotated_ears	Webbed_neck	Short_neck	Strabismus	Ptosis	Proptosis	Lacrimation_abnormality	Abnormality_of_the_sternum	Sacral_dimple	Seizures	Talipes	Respiratory_insufficiency	Wormian_bones	Fibular_aplasia	Vertebral_segmentation_defect	Bilateral_single_transverse_palmar_creases	Reduced_number_of_teeth	Open_bite	Midface_retrusion	Pointed_helix
Craniofacial-deafness-hand_syndrome	Narrow_mouth	Narrow_face	Hypertelorism	Hypoplasia_of_the_maxilla	Sensorineural_hearing_impairment	Depressed_nasal_ridge	Downslanted_palpebral_fissures	Lacrimal_duct_atresia	Blepharophimosis	Abnormality_of_the_wrist	Ulnar_deviation_of_the_wrist	Short_nose	Depressed_nasal_bridge	Ulnar_deviation_of_finger	Aplasia/Hypoplasia_involving_the_nose	Flat_face	Camptodactyly_of_finger
G√≥mez-L√≥pez-Hern√°ndez_syndrome	Thin_vermilion_border	Hydrocephalus	Brachycephaly	Turricephaly	Mask-like_facies	Hypertelorism	Low-set_ears	Anteverted_nares	Visual_impairment	Telecanthus	Ataxia	Abnormal_cerebellum_morphology	Cerebellar_vermis_hypoplasia	Alopecia_of_scalp	Intellectual_disability_moderate	Abnormality_of_brainstem_morphology	Short_stature	Impaired_pain_sensation	Corneal_opacity	Midface_retrusion	Cognitive_impairment	Toenail_dysplasia
Cryptomicrotia-brachydactyly-excess_fingertip_arch_syndrome	Bifid_scrotum	Telecanthus	Freckling	Hypoplastic_toenails	Brachytelomesophalangy	Abnormal_dermatoglyphics	Short_distal_phalanx_of_finger
Cryptorchidism-arachnodactyly-intellectual_disability_syndrome	Abnormal_testis_morphology	Hypospadias	Abnormality_of_the_dentition	Dolichocephaly	Strabismus	Pectus_carinatum	Arachnodactyly	Intellectual_disability	Muscular_hypotonia	Joint_stiffness	Abnormality_of_the_voice	Recurrent_respiratory_infections	Scoliosis	Delayed_skeletal_maturation	Kyphosis	Aplasia/Hypoplasia_of_the_lungs	Bilateral_single_transverse_palmar_creases
Jackson-Weiss_syndrome	Abnormal_palate_morphology	Turricephaly	Mandibular_prognathia	Hypertelorism	Hypoplasia_of_the_maxilla	Convex_nasal_ridge	Strabismus	Ptosis	Proptosis	Toe_syndactyly	Broad_metatarsal	Split_foot	Preaxial_foot_polydactyly	Frontal_bossing	Abnormality_of_fibula_morphology	2-3_toe_syndactyly	Symphalangism_affecting_the_phalanges_of_the_hand	Underdeveloped_supraorbital_ridges	Broad_hallux_phalanx	Short_metatarsal	Midface_retrusion
Crisponi_syndrome	Narrow_mouth	High_palate	Full_cheeks	Long_philtrum	Micrognathia	Wide_nose	Anteverted_nares	Hypohidrosis	Hyperhidrosis	Seizures	Hypertonia	Flexion_contracture	Limitation_of_joint_mobility	Death_in_infancy	Sudden_cardiac_death	Malignant_hyperthermia	Respiratory_insufficiency	Scoliosis	Kyphosis	Feeding_difficulties	Camptodactyly_of_finger	Cognitive_impairment	Large_face
Familial_calcium_pyrophosphate_deposition	Chondrocalcinosis	Seizures	Arthritis	Joint_dislocation	Limitation_of_joint_mobility	Joint_swelling	Osteoarthritis	Arthralgia	Abnormality_of_the_intervertebral_disk	Calcification_of_cartilage
Tarsal-carpal_coalition_syndrome	Abnormality_of_the_ankles	Short_stature	Tarsal_synostosis
Greenberg_dysplasia	Micrognathia	Narrow_chest	Platyspondyly	Lymphedema	Brachydactyly	Skull_defect	Abnormal_leukocyte_morphology	Micromelia	Abnormal_form_of_the_vertebral_bodies	Decreased_skull_ossification	Anterior_rib_punctate_calcifications	Severe_short-limb_dwarfism	Rhizomelia	Abnormal_pelvis_bone_ossification	Midface_retrusion	Abnormal_bone_ossification	Abnormally_ossified_vertebrae	Preeclampsia
Desbuquois_syndrome	Low-set_posteriorly_rotated_ears	Anteverted_nares	Short_neck	Abnormal_eyelash_morphology	Glaucoma	Proptosis	Blue_sclerae	Abnormality_of_the_metaphysis	Hypotrichosis	Intellectual_disability	Bell-shaped_thorax	Ventricular_septal_defect	Scoliosis	Coxa_valga	Coxa_vara	Genu_recurvatum	Radioulnar_synostosis	Patellar_dislocation	Elbow_dislocation	Abnormality_of_the_femoral_neck_or_head_region	Severe_short_stature	Clinodactyly_of_the_5th_finger	Depressed_nasal_bridge	Accelerated_skeletal_maturation	Joint_hyperflexibility	Disproportionate_short-limb_short_stature	Aplasia/Hypoplasia_of_the_abdominal_wall_musculature	Camptodactyly_of_finger	Small_hand
Benign_hereditary_chorea	Gait_disturbance	Abnormality_of_movement
Cerebrofaciothoracic_dysplasia	Wide_mouth	Cleft_palate	Cleft_upper_lip	Brachycephaly	Macrocephaly	Epicanthus	Broad_philtrum	Hypertelorism	Low-set_posteriorly_rotated_ears	Wide_nose	Short_neck	Strabismus	Downslanted_palpebral_fissures	Thick_eyebrow	Synophrys	Narrow_chest	Bifid_ribs	Rib_fusion	Sprengel_anomaly	Intellectual_disability	Cerebellar_vermis_hypoplasia	Polyhydramnios	Hypoplasia_of_the_corpus_callosum	Ventriculomegaly	Cerebral_cortical_atrophy	Low_posterior_hairline	Coarse_hair	Scoliosis	Hemivertebrae	Short_nose	Vertebral_segmentation_defect	Short_stature	Abnormal_hair_pattern	Midface_retrusion	Hernia
Isolated_cerebellar_agenesis	Microcephaly	Macrocephaly	Abnormality_of_eye_movement	Behavioral_abnormality	Seizures	Ataxia	Muscular_hypotonia	Hypertonia	Neurological_speech_impairment	Abnormality_of_movement
Hydrocephaly-cerebellar_agenesis_syndrome	Cataract	Intellectual_disability	Ataxia	Muscular_hypotonia	Cerebellar_agenesis
Richards-Rundle_syndrome	Dolichocephaly	Hearing_impairment	Nystagmus	Hypergonadotropic_hypogonadism	Ataxia	Mental_deterioration	Hypertonia	Gait_disturbance	Hyperreflexia	Joint_stiffness	Ketonuria	Distal_amyotrophy	Reduced_bone_mineral_density
Uncombable_hair_syndrome	Abnormality_of_the_hair	Coarse_hair	Woolly_hair	Alopecia_areata	Trichodysplasia	White_hair
Coloboma_of_macula-brachydactyly_type_B_syndrome	Renal_agenesis	Chorioretinal_coloboma	Absent_fingernail	Short_stature	Type_B_brachydactyly	Short_distal_phalanx_of_finger	Broad_thumb	Camptodactyly_of_finger	Fingernail_dysplasia
Contractures-ectodermal_dysplasia-cleft_lip/palate_syndrome	Cleft_palate	Lacrimation_abnormality	Hypohidrosis	Global_developmental_delay	Limitation_of_joint_mobility	Arthrogryposis_multiplex_congenita	Non-midline_cleft_lip	Cognitive_impairment
Lethal_congenital_contracture_syndrome_type_1	Hypertelorism	Micrognathia	Low-set_posteriorly_rotated_ears	Webbed_neck	Short_neck	Abnormality_of_the_ribs	Limitation_of_joint_mobility	Polyhydramnios	Pulmonary_hypoplasia	Recurrent_fractures	Slender_long_bone	Abnormal_cortical_bone_morphology	Skeletal_muscle_atrophy	Abnormality_of_the_hip_bone	Abnormal_form_of_the_vertebral_bodies	Short_stature	Amniotic_constriction_ring	Abnormality_of_the_elbow
Cooks_syndrome	Brachydactyly	Split_hand	Triphalangeal_thumb	Dystrophic_toenail	Abnormal_toenail_morphology	Dystrophic_fingernails	Aplastic/hypoplastic_toenail	Broad_thumb
Corneal_dystrophy-perceptive_deafness_syndrome	Sensorineural_hearing_impairment	Visual_impairment	Nystagmus	Corneal_dystrophy	Corneal_opacity
Vici_syndrome	High_palate	Hypertelorism	Sensorineural_hearing_impairment	Depressed_nasal_tip	Cataract	Hypotelorism	Nystagmus	Optic_atrophy	Hypopigmentation_of_the_skin	Abnormal_macular_morphology	Intellectual_disability	Seizures	Muscular_hypotonia	Global_developmental_delay	Agenesis_of_corpus_callosum	Cerebellar_hypoplasia	Joint_stiffness	Death_in_infancy	Cardiomyopathy	Renal_tubular_acidosis	Cerebral_cortical_atrophy	Recurrent_respiratory_infections	EEG_abnormality	Sleep_disturbance	Recurrent_infections	Decreased_circulating_IgG_level	Short_stature	Cellular_immunodeficiency	Ureteral_atresia	White_matter_neuronal_heterotopia	Abnormality_of_retinal_pigmentation	Immunoglobulin_IgG2_deficiency	Feeding_difficulties_in_infancy	Feeding_difficulties	Hypoplasia_of_the_pons
Intellectual_disability-hypoplastic_corpus_callosum-preauricular_tag_syndrome	Narrow_mouth	Abnormal_palate_morphology	Microcephaly	Micrognathia	High_forehead	Preauricular_skin_tag	Protruding_ear	Nystagmus	Optic_atrophy	Seizures	Hypertonia	Growth_delay	Intrauterine_growth_retardation	Death_in_infancy	Abnormality_of_the_voice	Talipes	Gastroesophageal_reflux	Hypoplasia_of_the_corpus_callosum	Ventriculomegaly	Malformation_of_the_heart_and_great_vessels	Delayed_skeletal_maturation	Short_nose	Short_stature	Recurrent_pneumonia	Intellectual_disability_severe	Abnormality_of_immune_system_physiology	Camptodactyly_of_finger
X-linked_complicated_corpus_callosum_dysgenesis	Microcephaly	Intellectual_disability	Seizures	Spasticity	Cerebellar_hypoplasia	Muscle_weakness	Aganglionic_megacolon
Choroidal_atrophy-alopecia_syndrome	Visual_impairment	Abnormal_fingernail_morphology	Fine_hair	Supernumerary_nipple	Finger_syndactyly	Abnormality_of_retinal_pigmentation	Sparse_hair	Abnormal_toenail_morphology	Ungual_fibroma	Sparse_or_absent_eyelashes
Xq21_microdeletion_syndrome	Sensorineural_hearing_impairment	Chorioretinal_abnormality	Choroideremia	Choroidal_degeneration	Abnormal_cochlea_morphology	Stapes_ankylosis	Conductive_hearing_impairment	Optic_atrophy	Growth_hormone_deficiency	Anterior_hypopituitarism	Ataxia	Intellectual_disability_mild	Global_developmental_delay	Hyperreflexia	Growth_delay	Obesity	Gait_ataxia	Delayed_skeletal_maturation	Dilatated_internal_auditory_canal	Abnormality_of_the_Achilles_tendon	Reduced_visual_acuity	Progressive_night_blindness	Reticular_pigmentary_degeneration	Peripheral_visual_field_loss	Pituitary_hypothyroidism	Bilateral_sensorineural_hearing_impairment	Postnatal_growth_retardation	Ankle_clonus	Visual_acuity_test_abnormality	Strabismus	Nystagmus	Hypertension	Seizures	Renal_artery_stenosis	Dysdiadochokinesis	Upper_limb_muscle_weakness
X-linked_skeletal_dysplasia-intellectual_disability_syndrome	Brachydactyly	Anal_atresia	Scoliosis	Fused_cervical_vertebrae	Short_stature	Abnormal_sacrum_morphology	Short_middle_phalanx_of_finger	Type_II_diabetes_mellitus	Thoracic_hemivertebrae
Cleidorhizomelic_syndrome	Abnormality_of_the_clavicle	Brachydactyly	Clinodactyly_of_the_5th_finger	Short_middle_phalanx_of_the_5th_finger	Diaphyseal_thickening	Bilateral_single_transverse_palmar_creases	Rhizomelia
Joubert_syndrome_with_hepatic_defect	Multicystic_kidney_dysplasia	Inguinal_hernia	Renal_insufficiency	Nephropathy	Oral_cleft	Hydrocephalus	Macrocephaly	Long_face	Low-set_ears	Prominent_nasal_bridge	Anteverted_nares	Strabismus	Visual_impairment	Ptosis	Chorioretinal_coloboma	Optic_nerve_coloboma	Iris_coloboma	Nystagmus	Oculomotor_apraxia	Abnormality_of_the_hypothalamus-pituitary_axis	Postaxial_hand_polydactyly	Seizures	Ataxia	Muscular_hypotonia	Gait_disturbance	Cerebellar_vermis_hypoplasia	Tremor	Hyperreflexia	Cirrhosis	Portal_hypertension	Splenomegaly	Occipital_encephalocele	Apnea	Hepatomegaly	Abnormality_of_neuronal_migration	Intellectual_disability_moderate	Highly_arched_eyebrow	Congenital_hepatic_fibrosis	Scoliosis	Abnormal_pattern_of_respiration	Neoplasm_of_the_liver	Elevated_hepatic_transaminase	Biparietal_narrowing	Intrahepatic_biliary_atresia	Aplasia/Hypoplasia_of_the_cerebellum	Aplasia/Hypoplasia_of_the_corpus_callosum	Feeding_difficulties_in_infancy	Chronic_hepatic_failure
Coats_disease	Strabismus	Glaucoma	Cataract	Retinal_detachment	Abnormal_anterior_chamber_morphology	Abnormal_macular_morphology	Abnormal_retinal_vascular_morphology	Aplasia/Hypoplasia_of_the_iris
CODAS_syndrome	Hydroureter	Epicanthus	Overfolded_helix	Sensorineural_hearing_impairment	Anteverted_nares	Strabismus	Ptosis	Cataract	Nystagmus	Abnormality_of_dental_eNAME	Delayed_eruption_of_teeth	Brachydactyly	Muscular_hypotonia	Global_developmental_delay	Congenital_hip_dislocation	Abnormality_of_the_larynx	Ventricular_septal_defect	Abnormality_of_pelvic_girdle_bone_morphology	Scoliosis	Delayed_skeletal_maturation	Short_nose	Abnormal_form_of_the_vertebral_bodies	Coronal_cleft_vertebrae	Midline_defect_of_the_nose	Short_stature	Extrahepatic_biliary_duct_atresia	Depressed_nasal_bridge	Joint_hyperflexibility	Abnormality_of_epiphysis_morphology	Abnormality_of_dental_morphology	Crumpled_ear	Short_metacarpal	Flat_face
COFS_syndrome	Hypogonadism	Everted_lower_lip_vermilion	Microcephaly	Micrognathia	Sensorineural_hearing_impairment	Wide_nasal_bridge	Short_neck	Visual_impairment	Cataract	Microphthalmia	Optic_atrophy	Cutaneous_photosensitivity	Seizures	Muscular_hypotonia	Hypertonia	Reduced_tendon_reflexes	Joint_stiffness	Intrauterine_growth_retardation	Death_in_infancy	Talipes	Cerebral_cortical_atrophy	Cerebral_calcification	Arthrogryposis_multiplex_congenita	Short_stature	Abnormal_nasal_morphology	Prominent_metopic_ridge	Aplasia/Hypoplasia_of_the_cerebellum	Abnormality_of_retinal_pigmentation	Feeding_difficulties_in_infancy	Peripheral_neuropathy	Abnormality_of_immune_system_physiology	Severe_global_developmental_delay	Camptodactyly_of_finger
Bone_dysplasia_lethal_Holmgren_type	High_forehead	Hearing_abnormality	Depressed_nasal_ridge	Anteverted_nares	Short_neck	Short_ribs	Narrow_chest	Abnormal_diaphysis_morphology	Abnormality_of_the_hand	Abnormal_thumb_morphology	Muscular_hypotonia	Joint_dislocation	Failure_to_thrive	Bell-shaped_thorax	Atrial_septal_defect	Hypertrophic_cardiomyopathy	Patent_ductus_arteriosus	Weight_loss	Talipes	Anemia	Frontal_bossing	Diarrhea	Nausea_and_vomiting	Respiratory_insufficiency	Recurrent_respiratory_infections	Hepatomegaly	Malformation_of_the_heart_and_great_vessels	Skeletal_dysplasia	Abnormality_of_femur_morphology	Micromelia	Joint_hyperflexibility	Abnormality_of_epiphysis_morphology	Redundant_neck_skin	Severe_short-limb_dwarfism	Rhizomelia	Abnormality_of_the_elbow	Flat_face	Metaphyseal_dysplasia	Hernia
X-linked_retinal_dysplasia	Strabismus	Visual_impairment	Nystagmus	Abnormality_of_retinal_pigmentation	Retinal_dysplasia	Abnormal_retinal_vascular_morphology
Mesomelic_dysplasia_Kantaputra_type	Abnormality_of_the_ribs	Talipes	Cubitus_valgus	Abnormality_of_fibula_morphology	Mesomelia	Abnormality_of_the_ankles	Abnormality_of_the_humerus	Vertebral_segmentation_defect	Clinodactyly_of_the_5th_finger	Short_stature	Dumbbell-shaped_humerus	Synostosis_of_carpal_bones	Tarsal_synostosis	Ulnar_deviation_of_finger	Camptodactyly_of_finger
Axial_mesodermal_dysplasia_spectrum	Abnormal_morphology_of_female_internal_genitalia	Abnormality_of_the_ureter	Abnormality_of_the_genital_system	Abnormality_of_the_urinary_system	Renal_cyst	Hydronephrosis	Gingival_overgrowth	Hydrocephalus	Hypertelorism	Facial_asymmetry	Micrognathia	Preauricular_skin_tag	Short_neck	Abnormality_of_the_nervous_system	Abnormality_of_the_ribs	Congenital_diaphragmatic_hernia	Missing_ribs	Abnormality_of_the_skeletal_system	Epibulbar_dermoid	Abnormality_of_the_liver	Omphalocele	Oligohydramnios	Premature_birth	Abnormality_of_the_spleen	Constipation	Gastroesophageal_reflux	Anal_atresia	Cerebral_cortical_atrophy	Abnormal_intestine_morphology	Tracheoesophageal_fistula	Abnormality_of_pelvic_girdle_bone_morphology	Scoliosis	Abnormality_of_the_knee	Abnormal_form_of_the_vertebral_bodies	Vertebral_segmentation_defect	Short_stature	Aplasia/Hypoplasia_of_the_lungs	Microtia	Renal_hypoplasia/aplasia	Morphological_abnormality_of_the_gastrointestinal_tract	Anorectal_anomaly	Abnormal_localization_of_kidney
Hereditary_mucoepithelial_dysplasia	Abnormal_morphology_of_female_internal_genitalia	Abnormality_of_the_bladder	Abnormality_of_the_genitourinary_system	Gingival_overgrowth	Furrowed_tongue	Cataract	Photophobia	Nystagmus	Hematuria	Hyperkeratosis	Corneal_dystrophy	Alopecia	Recurrent_respiratory_infections	Pulmonary_fibrosis	Fine_hair	Tracheoesophageal_fistula	Sparse_hair	Anorectal_anomaly
Ulna_metaphyseal_dysplasia_syndrome	Abnormality_of_the_dentition	Depressed_nasal_ridge	Microdontia	Nephrolithiasis	Abnormality_of_the_metaphysis	Abnormality_of_the_metacarpal_bones	Abnormality_of_the_voice	Delayed_skeletal_maturation	Abnormality_of_fibula_morphology	Abnormality_of_the_ulna	Abnormality_of_the_hip_bone	Abnormal_form_of_the_vertebral_bodies	Short_stature	Abnormality_of_dental_morphology	Aplasia/Hypoplasia_of_the_radius
Progressive_cone_dystrophy	Visual_impairment	Abnormal_electroretinogram	Color_vision_defect	Photophobia	Abnormality_of_retinal_pigmentation
Jalili_syndrome	Visual_impairment	Color_vision_defect	Photophobia	Nystagmus	Optic_atrophy	Abnormality_of_dental_eNAME	Amelogenesis_imperfecta	Abnormality_of_retinal_pigmentation	Abnormality_of_dental_color
Cone_rod_dystrophy	Visual_impairment	Color_vision_defect	Photophobia	Nyctalopia	Abnormality_of_retinal_pigmentation
Thanatophoric_dysplasia_type_1	Abnormality_of_the_kidney	Hydrocephalus	Macrocephaly	Wide_anterior_fontanel	Hearing_impairment	Proptosis	Narrow_chest	Platyspondyly	Abnormality_of_the_metaphysis	Hypoplastic_ilia	Acanthosis_nigricans	Brachydactyly	Split_hand	Seizures	Muscular_hypotonia	Joint_stiffness	Polyhydramnios	Redundant_skin	Atrial_septal_defect	Patent_ductus_arteriosus	Frontal_bossing	Respiratory_insufficiency	Ventriculomegaly	Intellectual_disability_profound	Gray_matter_heterotopia	Skeletal_dysplasia	Cloverleaf_skull	Kyphosis	Femoral_bowing	Micromelia	Short_femur	Short_greater_sciatic_notch	Depressed_nasal_bridge	Bowing_of_the_long_bones	Aplasia/Hypoplasia_of_the_lungs	Excessive_wrinkled_skin	Lethal_short-limbed_short_stature	Increased_nuchal_translucency	Flat_face	Abnormality_of_the_sacroiliac_joint
Skeletal_dysplasia-epilepsy-short_stature_syndrome	Abnormality_of_the_dentition	Mandibular_prognathia	Dental_malocclusion	Brachydactyly	Intellectual_disability	Seizures	Hip_dysplasia	EEG_abnormality	Scoliosis	Skeletal_dysplasia	Kyphosis	Hypoplastic_iliac_wing	Increased_circulating_total_IgE_level	Short_stature	Short_distal_phalanx_of_finger
Thoracic_dysplasia-hydrocephalus_syndrome	Conductive_hearing_impairment	Depressed_nasal_ridge	Narrow_chest	Abnormality_of_the_metaphysis	Intellectual_disability	Seizures	Ataxia	Muscular_hypotonia	Global_developmental_delay	Communicating_hydrocephalus	Respiratory_failure	Short_stature	Limb_undergrowth
Familial_developmental_dysphasia	Dysphasia	Expressive_language_delay	Incomprehensible_speech
Kyphomelic_dysplasia	Micrognathia	Narrow_chest	Lateral_clavicle_hook	Anterior_rib_cupping	Missing_ribs	Abnormality_of_the_metaphysis	Large_hands	Muscular_hypotonia	Limitation_of_joint_mobility	Joint_stiffness	Micromelia	Flat_acetabular_roof	Abnormal_form_of_the_vertebral_bodies	Disproportionate_short_stature	Bowing_of_the_long_bones	Short_thorax	Undulate_ribs	Flat_face
Ghosal_hematodiaphyseal_dysplasia	Abnormality_of_the_metaphysis	Splenomegaly	Anemia	Neurological_speech_impairment	Abnormality_of_pelvic_girdle_bone_morphology	Abnormality_of_femur_morphology	Abnormality_of_tibia_morphology	Abnormal_cortical_bone_morphology	Abnormal_form_of_the_vertebral_bodies	Craniofacial_hyperostosis	Diaphyseal_thickening	Bowing_of_the_long_bones	Abnormality_of_immune_system_physiology
Thoracomelic_dysplasia	Round_face	Short_neck	Short_ribs	Narrow_chest	Abnormality_of_the_metaphysis	Gait_disturbance	Bell-shaped_thorax	Low_posterior_hairline	Abnormality_of_pelvic_girdle_bone_morphology	Genu_valgum	Abnormality_of_fibula_morphology	Elbow_dislocation	Hyperlordosis	Diaphyseal_thickening	Joint_hyperflexibility	Disproportionate_short-limb_short_stature	Limb_undergrowth	Flat_face
Acrofacial_dysostosis_Rodriguez_type	Abnormality_of_the_uterus	Malar_flattening	Microretrognathia	Prominent_nasal_bridge	Sprengel_anomaly	Hand_oligodactyly	Intrauterine_growth_retardation	Talipes_equinovarus	Arrhinencephaly	Aqueductal_stenosis	Malformation_of_the_heart_and_great_vessels	Abnormality_of_pelvic_girdle_bone_morphology	Radioulnar_synostosis	Fibular_hypoplasia	Abnormal_form_of_the_vertebral_bodies	Finger_syndactyly	Aplasia/Hypoplasia_of_the_ulna	Aplasia/Hypoplasia_of_the_radius	Microtia	Renal_hypoplasia/aplasia
Hypomandibular_faciocranial_dysostosis	Abnormal_morphology_of_female_internal_genitalia	Narrow_mouth	Cleft_palate	Bifid_uvula	Trigonocephaly	Brachycephaly	Low-set_ears	Choanal_stenosis	Anteverted_nares	Downslanted_palpebral_fissures	Proptosis	Upslanted_palpebral_fissure	Optic_nerve_coloboma	Craniosynostosis	Death_in_infancy	Polyhydramnios	Atrial_septal_defect	Patent_ductus_arteriosus	Recurrent_respiratory_infections	Tracheal_stenosis	Short_nose	Maxillozygomatic_hypoplasia	Abnormal_tracheobronchial_morphology	Laryngeal_hypoplasia	Aplasia/Hypoplasia_of_the_tongue	Midface_retrusion	Cognitive_impairment
Oculomaxillofacial_dysostosis	Median_cleft_lip	Abnormality_of_the_dentition	Cleft_palate	Micrognathia	Abnormality_of_the_nose	Underdeveloped_nasal_alae	Wide_nasal_bridge	Abnormal_eyelid_morphology	Abnormal_eyelash_morphology	Upslanted_palpebral_fissure	Brachydactyly	Adducted_thumb	Facial_cleft	Abnormality_of_the_humerus	Short_stature	Corneal_opacity	Aplasia/Hypoplasia_affecting_the_eye	Camptodactyly_of_finger	Cognitive_impairment	Aplasia/Hypoplasia_of_the_eyebrow	Sparse_or_absent_eyelashes
Dysostosis_Stanescu_type	Macroglossia	Abnormality_of_the_dentition	Abnormal_palate_morphology	Brachycephaly	Microcephaly	Hypertelorism	Hypoplasia_of_the_maxilla	Convex_nasal_ridge	Narrow_nasal_bridge	Short_neck	Proptosis	Carious_teeth	Abnormality_of_dental_eNAME	Pectus_excavatum	Abnormal_skull_morphology	Abnormality_of_the_metaphysis	Brachydactyly	Cerebral_calcification	Wormian_bones	Scoliosis	Skeletal_dysplasia	Kyphosis	Micromelia	Hyperlordosis	Short_stature	Persistent_open_anterior_fontanelle	Abnormal_nasal_morphology	Massively_thickened_long_bone_cortices	Abnormality_of_epiphysis_morphology	Bowing_of_the_long_bones	Reduced_number_of_teeth	Hypoplasia_of_the_zygomatic_bone	Increased_bone_mineral_density	Midface_retrusion	Flat_face	Exostoses
Ectodermal_dysplasia-intellectual_disability-central_nervous_system_malformation_syndrome	Inguinal_hernia	Cryptorchidism	Cleft_palate	Hydrocephalus	Macrocephaly	Retrognathia	Epicanthus	Hypertelorism	Low-set_ears	Deeply_set_eye	Abnormal_eyelid_morphology	Downslanted_palpebral_fissures	Abnormality_of_dental_eNAME	Microdontia	Pectus_excavatum	Hypothyroidism	Dry_skin	Thin_skin	Hypohidrosis	Muscular_hypotonia	Agenesis_of_corpus_callosum	Gait_disturbance	Polyhydramnios	Sandal_gap	Frontal_bossing	Ventriculomegaly	Fine_hair	Supernumerary_nipple	Abnormality_of_fibula_morphology	Short_nose	Depressed_nasal_bridge	Aplasia/Hypoplasia_of_the_cerebellum	Hypoplasia_of_penis	Feeding_difficulties_in_infancy	Aplastic/hypoplastic_toenail	Hypoplasia_of_the_zygomatic_bone	Intellectual_disability_severe	Abnormality_of_immune_system_physiology	Aplasia/Hypoplasia_of_the_eyebrow
Epiphyseal_dysplasia-hearing_loss-dysmorphism_syndrome	Wide_mouth	Epicanthus	Hypertelorism	Facial_asymmetry	Long_philtrum	Sensorineural_hearing_impairment	Wide_nasal_bridge	Anteverted_nares	Ptosis	Behavioral_abnormality	Delayed_puberty	Hypopigmented_skin_patches	Abnormal_thumb_morphology	Intellectual_disability	Seizures	Deep_philtrum	Scoliosis	Delayed_skeletal_maturation	Abnormality_of_the_wrist	Short_stature	Depressed_nasal_bridge	Finger_syndactyly	Abnormal_dermatoglyphics	Proximal_placement_of_thumb	Abnormal_localization_of_kidney
Ectodermal_dysplasia-blindness_syndrome	Abnormality_of_the_dentition	Hearing_impairment	Protruding_ear	Narrow_nasal_bridge	Abnormality_of_the_eye	Microcornea	Abnormality_of_vision	Cataract	Microphthalmia	Blindness	Sclerocornea	Hyperkeratosis	Hypohidrosis	Abnormality_of_skin_pigmentation	Hypotrichosis	Keratoconjunctivitis_sicca	Corneal_dystrophy	Abnormal_fingernail_morphology	Intellectual_disability	Abnormal_facial_shape	Neurological_speech_impairment	Recurrent_respiratory_infections	Fine_hair	Short_stature	Skin_ulcer
Hidrotic_ectodermal_dysplasia_Christianson-Fourie_type	Sparse_eyelashes	Abnormality_of_the_hair	Abnormality_of_the_nail	Sparse_scalp_hair	Sparse_axillary_hair	Absent_eyebrow	Sparse_pubic_hair	Onychogryposis_of_toenails	Nail_dystrophy	Arrhythmia
Hidrotic_ectodermal_dysplasia_Halal_type	Abnormality_of_the_genital_system	Retrognathia	Hearing_impairment	Protruding_ear	Absent_eyelashes	Irregular_menstruation	Abnormal_fingernail_morphology	Intellectual_disability	Nail_dysplasia	Sparse_scalp_hair	Absent_eyebrow	Sparse_body_hair	Trichodysplasia	Supernumerary_nipple	Abnormal_dermatoglyphics	Follicular_hyperkeratosis	Multiple_cafe-au-lait_spots	Abnormal_toenail_morphology
Odontomicronychial_dysplasia	Abnormality_of_the_dentition	Abnormality_of_the_nail	Short_nail	Thin_nail	Premature_loss_of_primary_teeth	Premature_eruption_of_permanent_teeth	Slow-growing_nails
Fibular_dimelia-diplopodia_syndrome	Absent_tibia	Abnormality_of_the_face	Sacrococcygeal_teratoma
Caudal_duplication	Cryptorchidism	Abnormality_of_the_penis	Ureteral_duplication	Abnormality_of_the_genital_system	Omphalocele	Spina_bifida	Myelomeningocele	Vertebral_segmentation_defect	Uterus_didelphys	Abnormal_sacrum_morphology	Renal_hypoplasia/aplasia	Bifid_sacrum	Spinal_cord_lesion	Urogenital_fistula	Intestinal_duplication
Arterial_dissection-lentiginosis_syndrome	Melanocytic_nevus	Hemiparesis	Arterial_dissection	Arteriovenous_malformation
Split_cord_malformation_type_I	Generalized_hirsutism	Scoliosis	Diastomatomyelia
Wolcott-Rallison_syndrome	Neonatal_insulin-dependent_diabetes_mellitus	Abnormality_of_the_liver	Growth_delay	Skeletal_dysplasia	Short_stature	Neutropenia	Multiple_epiphyseal_dysplasia	Elevated_hepatic_transaminase	Hypoalbuminemia	Decreased_body_weight	Acute_hepatic_failure	Metaphyseal_dysplasia	Renal_insufficiency	Microcephaly	Strabismus	Hypothyroidism	Jaundice	Intellectual_disability	Seizures	Global_developmental_delay	Muscle_weakness	Exocrine_pancreatic_insufficiency	Iron_deficiency_anemia	Dehydration	Fever	Hyperammonemia	Ketoacidosis	Hepatomegaly	Difficulty_walking	Recurrent_infections	Hyperbilirubinemia	Central_hypothyroidism	Chronic_kidney_disease	Lymphocytosis	Brain_imaging_abnormality
Sporadic_fetal_brain_disruption_sequence	Microcephaly	Prominent_occiput	Abnormality_of_the_adrenal_glands	Spasticity	Plagiocephaly	Cerebral_cortical_atrophy	Intellectual_disability_progressive	Aplasia/Hypoplasia_of_the_thymus	Intellectual_disability_severe	Severe_global_developmental_delay
X-linked_corneal_dermoid	Visual_impairment	Visual_loss	Abnormal_pupil_morphology	Corneal_opacity
Acrofacial_dysostosis_Catania_type	Inguinal_hernia	Cryptorchidism	Hypospadias	Abnormality_of_the_dentition	Abnormal_palate_morphology	Microcephaly	Microretrognathia	Smooth_philtrum	High_forehead	Low-set_posteriorly_rotated_ears	Webbed_neck	Downslanted_palpebral_fissures	Carious_teeth	Pectus_excavatum	Brachydactyly	Intellectual_disability_mild	Intrauterine_growth_retardation	Premature_birth	Facial_cleft	Coarse_hair	Delayed_skeletal_maturation	Short_nose	Spina_bifida_occulta	Clinodactyly_of_the_5th_finger	Short_palm	Short_stature	Preauricular_pit	Finger_syndactyly	Abnormal_dermatoglyphics	Bilateral_single_transverse_palmar_creases	Feeding_difficulties_in_infancy	Reduced_number_of_teeth	Hypoplasia_of_the_zygomatic_bone	Abnormal_hair_pattern	Small_hand
Acrofrontofacionasal_dysostosis	Hypospadias	Bifid_scrotum	Abnormality_of_the_genitourinary_system	Cleft_palate	High_palate	Everted_lower_lip_vermilion	Brachycephaly	Hypertelorism	Broad_forehead	Broad_nasal_tip	Downslanted_palpebral_fissures	Ptosis	Eyelid_coloboma	Hypopigmented_skin_patches	Brushfield_spots	Brachydactyly	Anonychia	Cerebral_cortical_atrophy	Micromelia	Dimple_on_nasal_tip	Short_stature	Abnormality_of_epiphysis_morphology	Short_distal_phalanx_of_finger	Intellectual_disability_severe	Broad_thumb	Midface_retrusion	Non-midline_cleft_lip	Camptodactyly_of_finger	Aplasia/Hypoplasia_of_the_eyebrow
Dysosteosclerosis	Macrocephaly	Hypertelorism	Hearing_impairment	Nystagmus	Optic_atrophy	Abnormality_of_dental_eNAME	Delayed_eruption_of_teeth	Platyspondyly	Abnormality_of_the_metaphysis	Intellectual_disability	Abnormal_cranial_nerve_morphology	Ventricular_septal_defect	Developmental_regression	Cerebral_calcification	Recurrent_fractures	Irregular_vertebral_endplates	Short_stature	Craniofacial_hyperostosis	Aplasia/Hypoplasia_of_the_skin	Hypoplastic_vertebral_bodies	Increased_bone_mineral_density	Rough_bone_trabeculation
Thakker-Donnai_syndrome	Hydronephrosis	Rectovaginal_fistula	Narrow_mouth	Hypertelorism	Posteriorly_rotated_ears	Macrotia	Bulbous_nose	Anteverted_nares	Webbed_neck	Short_neck	Upslanted_palpebral_fissure	Long_palpebral_fissure	Congenital_diaphragmatic_hernia	Muscular_hypotonia	Agenesis_of_corpus_callosum	Communicating_hydrocephalus	Intrauterine_growth_retardation	Ventricular_septal_defect	Tetralogy_of_Fallot	Transposition_of_the_great_arteries	Anal_atresia	Tracheoesophageal_fistula	Downturned_corners_of_mouth	Hemivertebrae	Cervical_C2/C3_vertebral_fusion
Temtamy_syndrome	Abnormal_palate_morphology	Thick_lower_lip_vermilion	Macrocephaly	Dolichocephaly	Long_face	Coarse_facial_features	Hypertelorism	Facial_asymmetry	Micrognathia	Low-set_ears	Convex_nasal_ridge	Telecanthus	Chorioretinal_coloboma	Microphthalmia	Iris_coloboma	Brachydactyly	Intellectual_disability	Global_developmental_delay	Aortic_dilatation	Pes_planus	Short_toe	Genu_varum	Clinodactyly_of_the_5th_finger	Joint_hyperflexibility	Aplasia/Hypoplasia_of_the_corpus_callosum
Dysequilibrium_syndrome	Abnormality_of_the_eye	Strabismus	Abnormality_of_vision	Cataract	Intellectual_disability	Seizures	Ataxia	Muscular_hypotonia	Gait_disturbance	Hyperreflexia	Skeletal_muscle_atrophy	Short_stature	Cerebral_palsy	Abnormality_of_movement
Dyschondrosteosis-nephritis_syndrome	Proteinuria	Nephropathy	Strabismus	Microdontia	Behavioral_abnormality	Hematuria	Intrauterine_growth_retardation	Micromelia	Radial_bowing	Ulnar_bowing	Madelung_deformity	Short_stature	Aplasia/Hypoplasia_of_the_radius	Corneal_opacity	Mesomelic_short_stature
Retinal_degeneration-nanophthalmos-glaucoma_syndrome	Visual_impairment	Abnormal_electroretinogram	Myopia	Microphthalmia	Nystagmus	Optic_atrophy	Abnormality_of_retinal_pigmentation
Alpers-Huttenlocher_syndrome	Microcephaly	Abnormality_of_the_eye	Abnormality_of_vision	Blindness	Ataxia	Muscular_hypotonia	Spasticity	Coma	Global_developmental_delay	Choreoathetosis	Areflexia	Myoclonus	Generalized_tonic-clonic_seizures	Progressive_spasticity	Spastic_paraparesis	Developmental_regression	Paraparesis	Focal-onset_seizure	Abnormality_of_movement
Hypotrichosis_with_juvenile_macular_degeneration	Macular_degeneration	Blindness	Nystagmus	Hyperkeratosis	Melanocytic_nevus	Freckling	Sparse_scalp_hair	Fine_hair	Brittle_hair	Skeletal_dysplasia	Abnormality_of_limb_bone_morphology	Pili_torti	Short_stature	Abnormality_of_macular_pigmentation	Immunologic_hypersensitivity
Steroid_dehydrogenase_deficiency-dental_anomalies_syndrome	Abnormality_of_dental_eNAME	Hepatic_failure	Hypoplasia_of_dental_eNAME	Increased_number_of_teeth
Transcobalamin_deficiency	Thrombocytopenia	Neutropenia	Pancytopenia	Lymphopenia	Acute_kidney_injury	Megaloblastic_bone_marrow	Decreased_circulating_IgA_level	Decreased_circulating_total_IgM	Abnormality_of_chromosome_stability	Decreased_antibody_level_in_blood	Decreased_circulating_IgG_level	Methylmalonic_aciduria
Lipodystrophy_due_to_peptidic_growth_factors_deficiency	Narrow_mouth	Abnormality_of_the_face	Micrognathia	Convex_nasal_ridge	Abnormality_of_the_thorax	Pectus_excavatum	Palmoplantar_keratoderma	Abnormality_of_skin_pigmentation	Decreased_subcutaneous_fat	Thickened_skin	Flexion_contracture	Joint_stiffness	Abnormality_of_the_hair	Pes_planus	Weight_loss	Premature_graying_of_hair	Atherosclerosis	Abnormality_of_the_lower_limb	Abnormality_of_the_upper_limb	Abnormal_circulating_lipid_concentration	Cachexia	Reduced_bone_mineral_density	Aplasia/Hypoplasia_of_the_skin	Lipodystrophy	Hyperlipoproteinemia	Lipoatrophy	Type_I_diabetes_mellitus	Lack_of_skin_elasticity
Prolidase_deficiency	Low_anterior_hairline	Hypertelorism	Micrognathia	Hearing_impairment	Abnormality_of_the_middle_ear	Depressed_nasal_ridge	Visual_impairment	Proptosis	Carious_teeth	Dry_skin	Hyperkeratosis	Thin_skin	Palmoplantar_keratoderma	Pruritus	Cutaneous_photosensitivity	Hirsutism	Arachnodactyly	Abnormal_fingernail_morphology	Intellectual_disability	Splenomegaly	Abnormal_facial_shape	Recurrent_respiratory_infections	White_forelock	Generalized_hirsutism	Hepatomegaly	Abnormality_of_the_immune_system	Genu_valgum	Abnormality_of_the_hip_bone	Reduced_bone_mineral_density	Depressed_nasal_bridge	Crusting_erythematous_dermatitis	Bilateral_single_transverse_palmar_creases	Abnormality_of_retinal_pigmentation	Aplasia/Hypoplasia_of_the_skin	Hypoplasia_of_the_zygomatic_bone	Erythema	Recurrent_cystitis	Papule	Skin_ulcer
Dermatoleukodystrophy	Hyperkeratosis	Thickened_skin	Intellectual_disability	Reduced_tendon_reflexes	Hyperreflexia	Abnormality_of_nervous_system_morphology
Dermoodontodysplasia	Mandibular_prognathia	Abnormal_eyelid_morphology	Ptosis	Microdontia	Dry_skin	Thin_skin	Hypohidrosis	Ectodermal_dysplasia	Melanocytic_nevus	Sparse_scalp_hair	Sparse_body_hair	Trichodysplasia	Abnormal_dermatoglyphics	Reduced_number_of_teeth	Toenail_dysplasia	Fingernail_dysplasia
Dermatoosteolysis_Kirghizian_type	Abnormality_of_the_dentition	Keratitis	Nyctalopia	Oligodontia	Abnormal_diaphysis_morphology	Abnormality_of_the_metaphysis	Abnormality_of_the_hand	Brachydactyly	Abnormality_of_the_nail	Abnormality_of_the_foot	Dystrophic_toenail	Fever	Scoliosis	Osteoarthritis	Osteolysis	Arthralgia	Abnormality_of_the_wrist	Aplasia/Hypoplasia_of_the_skin	Tarsal_synostosis	Dystrophic_fingernails	Skin_ulcer
Absence_of_fingerprints-congenital_milia_syndrome	Thin_skin	Hypohidrosis	Skin_rash	Milia	Thickened_skin	Abnormal_dermatoglyphics	Abnormal_blistering_of_the_skin	Amniotic_constriction_ring	Camptodactyly_of_finger
Dentin_dysplasia	Abnormality_of_dental_eNAME	Abnormality_of_dental_morphology	Increased_bone_mineral_density	Exostoses
1p36_deletion_syndrome	Cryptorchidism	Hypospadias	Abnormality_of_female_external_genitalia	Abnormality_of_the_kidney	Renal_cyst	Hydronephrosis	Hypogonadism	Narrow_mouth	Brachycephaly	Microcephaly	Delayed_cranial_suture_closure	Epicanthus	Pointed_chin	Long_philtrum	Low-set_posteriorly_rotated_ears	Conductive_hearing_impairment	Sensorineural_hearing_impairment	Wide_nasal_bridge	Depressed_nasal_ridge	Abnormality_of_the_neck	Strabismus	Deeply_set_eye	Abnormality_of_vision	Visual_impairment	Cataract	Abnormal_eyebrow_morphology	Nystagmus	Optic_atrophy	Behavioral_abnormality	Autism	Stereotypy	Delayed_speech_and_language_development	Hypothyroidism	11_pairs_of_ribs	Bifid_ribs	Rib_fusion	Telangiectasia	Ocular_albinism	Brachydactyly	Intellectual_disability	Seizures	Muscular_hypotonia	Global_developmental_delay	Agenesis_of_corpus_callosum	Gait_disturbance	Absent_speech	Hip_dysplasia	Joint_stiffness	Abnormality_of_the_liver
Oculocerebrocutaneous_syndrome	Cryptorchidism	Wide_mouth	Oral_cleft	Hydrocephalus	Hypertelorism	Hearing_impairment	Preauricular_skin_tag	Ptosis	Iris_coloboma	Eyelid_coloboma	Nystagmus	Abnormality_of_the_ribs	Congenital_diaphragmatic_hernia	Missing_ribs	Hypopigmented_skin_patches	Hand_polydactyly	Abnormal_fingernail_morphology	Intellectual_disability	Seizures	Dysarthria	Dandy-Walker_malformation	Cerebellar_hypoplasia	Skull_defect	Congenital_hip_dislocation	Alopecia	Talipes	Facial_cleft	Ventriculomegaly	Polymicrogyria	Abnormality_of_the_cerebellar_vermis	Hemiplegia/hemiparesis	Finger_syndactyly	Aplasia/Hypoplasia_of_the_corpus_callosum	Corneal_opacity	Aplasia/Hypoplasia_of_the_skin	External_ear_malformation	Short_distal_phalanx_of_finger	Aplasia/Hypoplasia_of_the_distal_phalanges_of_the_toes	Skin_tags	Exostoses
Blepharo-cheilo-odontic_syndrome	Hypertelorism	Conductive_hearing_impairment	Abnormality_of_the_eye	Abnormal_eyelid_morphology	Abnormality_of_vision	Carious_teeth	Conical_tooth	Anal_atresia	Bilateral_cleft_lip_and_palate	Finger_syndactyly	Ectropion_of_lower_eyelids	Distichiasis	Abnormal_hair_quantity	Euryblepharon	Epidermoid_cyst
Cleft_lip-retinopathy_syndrome	Retinopathy	Visual_impairment	Abnormality_of_retinal_pigmentation	Non-midline_cleft_lip
Cleft_lip/palate-deafness-sacral_lipoma_syndrome	Facial_asymmetry	Depressed_nasal_ridge	Ataxia	Sparse_scalp_hair	Meningocele	Bilateral_cleft_lip_and_palate	Hip_dislocation	Absent_nasal_septal_cartilage	Severe_sensorineural_hearing_impairment	Reduced_number_of_teeth	Sacral_lipoma	Non-midline_cleft_lip	Lower_limb_asymmetry
Cleft_lip/palate-intestinal_malrotation-cardiopathy_syndrome	Hypertelorism	Micrognathia	Short_neck	Upslanted_palpebral_fissure	Patent_ductus_arteriosus	Abnormal_aortic_morphology	Malformation_of_the_heart_and_great_vessels	Intestinal_malrotation	Bilateral_cleft_lip_and_palate	Clinodactyly_of_the_5th_finger	Hypoplastic_left_heart	Flat_occiput	Bifid_tongue	Broad_thumb	Flat_face
Laryngotracheoesophageal_cleft	Laryngeal_cleft	Cyanosis	Laryngomalacia	Abnormality_of_the_voice	Hoarse_cry	Dyspnea	Recurrent_respiratory_infections	Aspiration	Stridor	Cough	Choking_episodes	Impaired_oropharyngeal_swallow_response	Neonatal_respiratory_distress
Acrocardiofacial_syndrome	Cryptorchidism	Hypospadias	Cleft_palate	Cleft_upper_lip	Hypertelorism	High_forehead	Low-set_ears	Wide_nasal_bridge	Proptosis	Long_eyelashes	Hyperthyroidism	Abnormality_of_the_metacarpal_bones	Split_hand	Intellectual_disability	Seizures	Muscular_hypotonia	Hypertonia	Joint_dislocation	Intrauterine_growth_retardation	Death_in_infancy	Ventricular_septal_defect	Atrial_septal_defect	Tetralogy_of_Fallot	Truncus_arteriosus	Coarctation_of_aorta	Mitral_stenosis	Toe_syndactyly	Hallux_valgus	Foot_polydactyly	Split_foot	Anal_atresia	Cerebral_cortical_atrophy	Finger_syndactyly	Hypoplasia_of_penis	Feeding_difficulties_in_infancy	Camptodactyly_of_finger	Urogenital_fistula
Alar_cartilages_hypoplasia-coloboma-telecanthus_syndrome	Hypertelorism	Underdeveloped_nasal_alae	Wide_nasal_bridge	Convex_nasal_ridge	Telecanthus	Cleft_ala_nasi	Non-midline_cleft_lip
Cleft_palate-large_ears-small_head_syndrome	Hypospadias	Cleft_palate	Gingival_overgrowth	Microcephaly	Micrognathia	Macrotia	Protruding_ear	Ptosis	Pectus_excavatum	Muscular_hypotonia	Global_developmental_delay	Hypoplastic_toenails	Delayed_skeletal_maturation	Skeletal_muscle_atrophy	Short_stature	Elfin_facies	Aplasia/Hypoplasia_of_the_nipples	Ulnar_deviation_of_finger	Short_distal_phalanx_of_finger
Cleft_palate-stapes_fixation-oligodontia_syndrome	Cleft_palate	Atresia_of_the_external_auditory_canal	Telecanthus	Abnormality_of_the_wrist	Abnormality_of_the_ankles	Tarsal_synostosis	Bilateral_conductive_hearing_impairment	Carpal_synostosis	Oligodontia_of_primary_teeth
Sternal_cleft	Abnormality_of_the_neck	Webbed_neck	Abnormality_of_the_eye	Abnormality_of_vision
Cleft_palate-lateral_synechia_syndrome	Narrow_mouth	Cleft_palate	Everted_lower_lip_vermilion	Full_cheeks	Micrognathia	Blepharophimosis	Abnormality_of_the_voice	Oral_synechia
Fibrochondrogenesis	Narrow_mouth	Cleft_palate	Wide_anterior_fontanel	Round_face	Hypertelorism	Hearing_abnormality	Low-set_ears	Anteverted_nares	Short_neck	Downslanted_palpebral_fissures	Proptosis	Abnormality_of_the_ribs	Short_ribs	Narrow_chest	Hypoplastic_scapulae	Broad_ribs	Abnormal_diaphysis_morphology	Abnormality_of_the_metaphysis	Brachydactyly	Plagiocephaly	Omphalocele	Bell-shaped_thorax	Hypoplastic_fingernail	Respiratory_insufficiency	Micromelia	Abnormal_form_of_the_vertebral_bodies	Short_stature	Depressed_nasal_bridge	Camptodactyly_of_finger
Femur-fibula-ulna_complex	Split_hand	Abnormality_of_femur_morphology	Micromelia	Abnormality_of_the_ulna	Humeroradial_synostosis	Short_stature	Short_humerus	Finger_syndactyly	Aplasia/Hypoplasia_of_the_radius	Abnormality_of_the_elbow
Hereditary_gingival_fibromatosis	Gingival_fibromatosis	Gingival_overgrowth
Endocardial_fibroelastosis	Cryptorchidism	Abnormal_palate_morphology	Micrognathia	Low-set_posteriorly_rotated_ears	Telecanthus	Anterior_hypopituitarism	Seizures	Congestive_heart_failure	Endocardial_fibroelastosis	Restrictive_cardiomyopathy	Sandal_gap	Hypoglycemia	Malformation_of_the_heart_and_great_vessels	Hypoplasia_of_penis	Abnormality_of_the_helix	Cognitive_impairment
Epiphyseal_stippling-osteoclastic_hyperplasia_syndrome	Hypotelorism	Patent_ductus_arteriosus	Abnormality_of_calvarial_morphology	Genu_varum	Coronal_cleft_vertebrae	Lethal_skeletal_dysplasia	Bowing_of_the_long_bones	Epiphyseal_stippling	Abnormal_bone_ossification	Rough_bone_trabeculation
Congenital_lethal_erythroderma	Dry_skin	Urticaria	Failure_to_thrive	Death_in_infancy	Malabsorption	Respiratory_insufficiency	Hypoalbuminemia	Congenital_exfoliative_erythroderma	Ichthyosis
Spinocerebellar_ataxia_type_34	Facial_asymmetry	Strabismus	Nystagmus	Dry_skin	Hypohidrosis	Urticaria	Dysarthria	Hyporeflexia	Gait_disturbance	Progressive_cerebellar_ataxia	Dysdiadochokinesis	Neurological_speech_impairment	Abnormality_of_the_musculature	Macule	Abnormality_of_movement	Papule
Exostoses-anetodermia-brachydactyly_type_E_syndrome	Multiple_exostoses	Dermal_atrophy	Type_E_brachydactyly	Aplasia/Hypoplasia_of_the_skin	Macule
Extrasystoles-short_stature-hyperpigmentation-microcephaly_syndrome	Microcephaly	Hypertelorism	Micrognathia	Strabismus	Delayed_skeletal_maturation	Short_stature	Ventricular_extrasystoles	Bacterial_endocarditis	Irregular_hyperpigmentation	Abnormal_dermatoglyphics	Bilateral_single_transverse_palmar_creases	Reduced_number_of_teeth	Heart_block
Flat_face-microstomia-ear_anomaly_syndrome	Inguinal_hernia	Cryptorchidism	Scrotal_hypoplasia	Narrow_mouth	Malar_flattening	Long_face	Broad_forehead	Long_philtrum	Micrognathia	High_forehead	Low-set_posteriorly_rotated_ears	Macrotia	Underdeveloped_nasal_alae	Wide_nasal_bridge	Telecanthus	Sparse_eyebrow	Blepharophimosis	Nasal_speech	Highly_arched_eyebrow	Scoliosis	High_narrow_palate	Downturned_corners_of_mouth	Long_nose	Abnormality_of_the_antihelix	Abnormality_of_the_antitragus	Aplasia/Hypoplasia_of_the_earlobes	Abnormality_of_the_tragus	Hypoplasia_of_the_zygomatic_bone	Chin_dimple	Abnormal_oral_mucosa_morphology	Flat_face	Camptodactyly_of_finger
Facial_dysmorphism-anorexia-cachexia-eye_and_skin_anomalies_syndrome	Anteverted_nares	Ptosis	Pectus_excavatum	Abnormality_of_the_thyroid_gland	Melanocytic_nevus	Asymmetry_of_the_thorax	Abnormality_of_the_voice	Abnormal_mitral_valve_morphology	Anorexia	Scoliosis	Kyphosis	Genu_varum	Skeletal_muscle_atrophy	Midline_defect_of_the_nose	Short_stature	Cachexia	Finger_syndactyly	Generalized_hypopigmentation	Multiple_cafe-au-lait_spots	Abnormality_of_retinal_pigmentation	Short_hard_palate
Facial_dysmorphism-macrocephaly-myopia-Dandy-Walker_malformation_syndrome	Cryptorchidism	Scrotal_hypoplasia	Abnormality_of_the_dentition	Abnormal_palate_morphology	Macrocephaly	Coarse_facial_features	Epicanthus	Broad_forehead	High_forehead	Low-set_posteriorly_rotated_ears	Wide_nasal_bridge	Myopia	Thick_eyebrow	Nystagmus	Optic_atrophy	Synophrys	Hirsutism	Fundus_atrophy	Seizures	Muscular_hypotonia	Hypertonia	Dandy-Walker_malformation	Broad_nail	Scoliosis	Hemiplegia/hemiparesis	Intellectual_disability_progressive	Short_distal_phalanx_of_finger	Intellectual_disability_severe	Abnormality_of_the_helix
Lethal_faciocardiomelic_dysplasia	Narrow_mouth	Microglossia	Microretrognathia	Intrauterine_growth_retardation	Patent_ductus_arteriosus	Sandal_gap	Hypoplasia_of_the_radius	Hypoplasia_of_the_ulna	Fibular_hypoplasia	Radial_club_hand	Hypoplastic_left_heart	Short_tibia	Bilateral_single_transverse_palmar_creases	Short_5th_finger	Short_thumb
Faciocardiorenal_syndrome	Horseshoe_kidney	Narrow_mouth	Cleft_palate	Hypertelorism	Smooth_philtrum	Protruding_ear	Underdeveloped_nasal_alae	Wide_nasal_bridge	Hypodontia	Intellectual_disability	Plagiocephaly	Failure_to_thrive	Tricuspid_valve_prolapse	Endocardial_fibroelastosis
Autosomal_recessive_faciodigitogenital_syndrome	Shawl_scrotum	Wide_mouth	High_palate	Everted_lower_lip_vermilion	Brachycephaly	Long_face	Hypertelorism	Triangular_face	Long_philtrum	Micrognathia	Widow's_peak	Posteriorly_rotated_ears	Overfolded_helix	Prominent_nasal_bridge	Anteverted_nares	Long_neck	Telecanthus	Upslanted_palpebral_fissure	Long_palpebral_fissure	Hyperextensible_skin	Brachydactyly	Short_foot	Deep_philtrum	Frontal_bossing	Coarse_hair	Short_nose	Clinodactyly_of_the_5th_finger	Short_stature	Hypopigmentation_of_hair	Joint_hyperflexibility	Finger_syndactyly	Open_bite	Dry_hair	Down-sloping_shoulders
Bilateral_striopallidodentate_calcinosis	Microcephaly	Seizures	Abnormality_of_the_liver	Intrauterine_growth_retardation	Thrombocytopenia	Subcutaneous_hemorrhage	Ventriculomegaly	Hepatomegaly	Abnormality_of_neuronal_migration	Cerebral_calcification	Corneal_opacity
Gollop-Wolfgang_complex	Monodactyly_(hands)	Aplasia/Hypoplasia_of_the_tibia	Aplasia/Hypoplasia_of_the_ulna	Bifid_femur	Ectrodactyly
Femoral-facial_syndrome	Inguinal_hernia	Cryptorchidism	Long_penis	Polycystic_kidney_dysplasia	Cleft_palate	Oral_cleft	Thin_upper_lip_vermilion	Long_philtrum	Micrognathia	Low-set_ears	Strabismus	Upslanted_palpebral_fissure	Abnormality_of_the_ribs	Rib_fusion	Sprengel_anomaly	Hip_dysplasia	Talipes_equinovarus	Preaxial_foot_polydactyly	Ventriculomegaly	Malformation_of_the_heart_and_great_vessels	Abnormality_of_pelvic_girdle_bone_morphology	Scoliosis	Coxa_vara	Radioulnar_synostosis	Abnormality_of_fibula_morphology	Short_femur	Short_nose	Vertebral_segmentation_defect	Short_stature	Abnormal_sacrum_morphology	Aplasia/Hypoplasia_of_the_tibia	Aplasia/Hypoplasia_of_the_corpus_callosum	Microtia	Renal_hypoplasia/aplasia	Maternal_diabetes	Abnormal_localization_of_kidney
Pai_syndrome	Median_cleft_lip	Cleft_palate	Abnormal_oral_frenulum_morphology	Bifid_uvula	Hypertelorism	Downslanted_palpebral_fissures	Telecanthus	Iris_coloboma	Subcutaneous_nodule	Encephalocele	Midline_defect_of_the_nose	Depressed_nasal_bridge	Midline_central_nervous_system_lipomas	Aplasia/Hypoplasia_of_the_corpus_callosum	Skin_tags	Nasal_polyposis
Fetal_trimethadione_syndrome	Hypospadias	Ambiguous_genitalia	High_palate	Brachycephaly	Microcephaly	Epicanthus	Micrognathia	Low-set_ears	Overfolded_helix	Strabismus	Ptosis	Synophrys	Intellectual_disability	Global_developmental_delay	Intrauterine_growth_retardation	Ventricular_septal_defect	Atrial_septal_defect	Tetralogy_of_Fallot	Transposition_of_the_great_arteries	Scoliosis	Short_nose	Depressed_nasal_bridge	Bilateral_single_transverse_palmar_creases	Abnormality_of_the_helix	Prominent_forehead	Midface_retrusion
Fetal_hydantoin_syndrome	Cryptorchidism	Bifid_scrotum	Wide_mouth	Cleft_palate	Everted_lower_lip_vermilion	Abnormality_of_the_fontanelles_or_cranial_sutures	Microcephaly	Epicanthus	Hypertelorism	Hearing_abnormality	Low-set_posteriorly_rotated_ears	Abnormality_of_the_pinna	Depressed_nasal_ridge	Thickened_nuchal_skin_fold	Strabismus	Ptosis	Triphalangeal_thumb	Global_developmental_delay	Intrauterine_growth_retardation	Abnormality_of_the_cardiovascular_system	Hypoplastic_fingernail	Low_posterior_hairline	Coarse_hair	Neoplasm	Short_nose	Short_stature	Wide_intermamillary_distance	Abnormal_dermatoglyphics	Short_distal_phalanx_of_finger	Hernia
Fetal_minoxidil_syndrome	Cryptorchidism	Micrognathia	Low-set_posteriorly_rotated_ears	Umbilical_hernia	Ventricular_septal_defect	Generalized_hirsutism	Clinodactyly_of_the_5th_finger	Depressed_nasal_bridge
Cocaine_embryofetopathy	Abnormality_of_the_urinary_system	Hypertonia	Hyperreflexia	Abnormality_of_the_cardiovascular_system	Encephalocele	Short_distal_phalanx_of_finger	Intestinal_atresia	Celosomia
Phenobarbital_embryopathy	Epicanthus	Mandibular_prognathia	Hypertelorism	Low-set_ears	Brachydactyly	Intellectual_disability	Global_developmental_delay	Aplasia/Hypoplasia_of_the_nails	Abnormal_nasal_base	Unilateral_cleft_lip	Hypospadias	Microcephaly	Malar_flattening	Abnormal_mitral_valve_morphology	Tetralogy_of_Fallot	Aplasia/Hypoplasia_of_fingers
Fetal_methylmercury_syndrome	Microcephaly	Hearing_impairment	Visual_impairment	Muscular_hypotonia	Short_stature
Fetal_cytomegalovirus_syndrome	Sensorineural_hearing_impairment	Abnormality_of_the_eye	Abnormality_of_vision	Splenomegaly	Anemia	Abnormality_of_coagulation	Hepatomegaly
Vitamin_K_antagonist_embryofetopathy	Macroglossia	Hydrocephalus	Hypertelorism	Hearing_impairment	Choanal_atresia	Anteverted_nares	Short_neck	Visual_impairment	Cataract	Proptosis	Optic_atrophy	Brachydactyly	Intellectual_disability	Seizures	Muscular_hypotonia	Intrauterine_growth_retardation	Respiratory_insufficiency	Myelomeningocele	Malformation_of_the_heart_and_great_vessels	Short_nose	Depressed_nasal_bridge	Aplasia/Hypoplasia_affecting_the_eye	Punctate_vertebral_calcifications	Microtia	Short_distal_phalanx_of_finger	Epiphyseal_stippling
Emery-Nelson_syndrome	High_palate	Long_philtrum	High_forehead	Brachydactyly	Abnormal_thumb_morphology	Neonatal_hypotonia	Low_posterior_hairline	Depressed_nasal_bridge	Metacarpophalangeal_joint_contracture	Contractures_of_the_interphalangeal_joint_of_the_thumb	Flat_face	Camptodactyly_of_finger
Diabetic_embryopathy	Abnormal_morphology_of_female_internal_genitalia	Cryptorchidism	Micropenis	Ureteral_duplication	Tall_stature	Hydronephrosis	Cleft_palate	Hydrocephalus	Microcephaly	Micrognathia	Hearing_impairment	Low-set_posteriorly_rotated_ears	Abnormality_of_the_neck	Abnormality_of_the_nervous_system	Single_umbilical_artery	Ventricular_septal_defect	Tetralogy_of_Fallot	Transposition_of_the_great_arteries	Abnormal_aortic_morphology	Abnormality_of_the_pancreas	Frontal_bossing	Malformation_of_the_heart_and_great_vessels	Vertebral_segmentation_defect	Abnormality_of_the_pulmonary_artery	Abnormal_sacrum_morphology	Aplasia/Hypoplasia_of_the_cerebellum	Aplasia/Hypoplasia_of_the_corpus_callosum	Aplasia/Hypoplasia_affecting_the_eye	Microtia	Renal_hypoplasia/aplasia	Spinal_dysraphism	Aplasia/Hypoplasia_of_the_abdominal_wall_musculature
Methimazole_embryofetopathy	Hypospadias	Choanal_atresia	Abnormality_of_the_thyroid_gland	Hypothyroidism	Skull_defect	Intrauterine_growth_retardation	Polyhydramnios	Ventricular_septal_defect	Abnormal_aortic_morphology	Coarctation_of_aorta	Esophageal_atresia	Tracheoesophageal_fistula	Urogenital_fistula
Toluene_embryopathy	Cryptorchidism	Hydronephrosis	Thin_vermilion_border	Microcephaly	Epicanthus	Smooth_philtrum	Micrognathia	Low-set_ears	Protruding_ear	Strabismus	Tapered_finger	Muscular_hypotonia	Global_developmental_delay	Hyperreflexia	Neurological_speech_impairment	Short_nose	Short_stature	Biparietal_narrowing	Abnormal_dermatoglyphics	Hypoplasia_of_the_zygomatic_bone	Short_palpebral_fissure	Abnormal_localization_of_kidney
Lowry-Wood_syndrome	Microcephaly	Astigmatism	Visual_impairment	Nystagmus	Platyspondyly	Brachydactyly	Intellectual_disability	Joint_stiffness	Epiphyseal_dysplasia	Delayed_skeletal_maturation	Coxa_vara	Arthralgia	Patellar_dislocation	Elbow_dislocation	Dislocated_radial_head	Short_stature	Abnormality_of_epiphysis_morphology	Aplasia/Hypoplasia_of_the_corpus_callosum	Abnormality_of_retinal_pigmentation	Irregular_epiphyses	Abnormality_of_nail_color
Dysplasia_epiphysealis_hemimelica	Joint_stiffness	Pes_planus	Bone_pain	Recurrent_fractures	Osteoarthritis	Abnormality_of_femur_morphology	Genu_valgum	Genu_varum	Abnormality_of_the_femoral_neck	Accelerated_skeletal_maturation	Abnormality_of_epiphysis_morphology	Tarsal_synostosis	Flattened_femoral_head	Irregular_epiphyses	Asymmetric_growth	Exostoses
Eng-Strom_syndrome	Pectus_excavatum	Brachydactyly	Arthritis	Intrauterine_growth_retardation	Ventricular_septal_defect	Abnormal_cardiac_septum_morphology	Scoliosis	Short_stature	Camptodactyly_of_finger
Hypohidrotic_ectodermal_dysplasia-hypothyroidism-ciliary_dyskinesia_syndrome	Sparse_eyebrow	Lacrimation_abnormality	Behavioral_abnormality	Hypothyroidism	Hypohidrosis	Melanocytic_nevus	Alopecia	Dystrophic_toenail	Recurrent_respiratory_infections	Sparse_scalp_hair	Fine_hair	Delayed_skeletal_maturation	Short_stature	Dystrophic_fingernails	Ciliary_dyskinesia
Ectodermal_dysplasia-sensorineural_deafness_syndrome	Sensorineural_hearing_impairment	Carious_teeth	Hyperkeratosis	Arachnodactyly	Coarse_hair	Brittle_hair	Scoliosis	Kyphosis	Short_stature	Hidrotic_ectodermal_dysplasia	Sparse_hair	Joint_contracture_of_the_5th_finger	Camptodactyly_of_finger	Cognitive_impairment
Congenital_muscular_dystrophy-infantile_cataract-hypogonadism_syndrome	Hypogonadism	Abnormality_of_the_ovary	Mask-like_facies	Strabismus	Ptosis	Cataract	Muscular_hypotonia	Gait_disturbance	Kyphosis	Cubitus_valgus	Congenital_muscular_dystrophy	Joint_hyperflexibility	Wide_intermamillary_distance	Decreased_testicular_size
Melorheostosis_with_osteopoikilosis	Hypertension	Abnormality_of_the_skin	Multiple_lipomas	Subcutaneous_nodule	Abnormal_cortical_bone_morphology	Complete_duplication_of_the_distal_phalanges_of_the_hand	Osteopoikilosis
Focal_facial_dermal_dysplasia_type_III	Epicanthus	Short_philtrum	Wide_nasal_bridge	Depressed_nasal_ridge	Strabismus	Downslanted_palpebral_fissures	Lacrimation_abnormality	Hypopigmented_skin_patches	Redundant_skin	Anal_atresia	Highly_arched_eyebrow	Downturned_corners_of_mouth	Sparse_lateral_eyebrow	Prematurely_aged_appearance	Multiple_cafe-au-lait_spots	Sparse_lower_eyelashes	Aplasia/Hypoplasia_of_the_skin	Sparse_hair	Distichiasis	Abnormal_hair_pattern	Chin_dimple	Abnormality_of_the_upper_urinary_tract	Abnormality_of_the_sacroiliac_joint
Intellectual_disability-spasticity-ectrodactyly_syndrome	Intellectual_disability	Spasticity	Spastic_paraplegia	Hyperreflexia	Abnormality_of_the_upper_limb	Abnormality_of_the_hip_bone	Clinodactyly_of_the_5th_finger	Finger_syndactyly	Bilateral_single_transverse_palmar_creases
Leukomelanoderma-infantilism-intellectual_disability-hypodontia-hypotrichosis_syndrome	Hypospadias	Decreased_fertility	Depressed_nasal_ridge	Abnormal_eyebrow_morphology	Hypodontia	Delayed_eruption_of_teeth	Nephrolithiasis	Delayed_puberty	Palmoplantar_keratoderma	Intellectual_disability	Generalized_hirsutism	Short_stature	Irregular_hyperpigmentation	Generalized_hypopigmentation	Hypoplasia_of_penis	Shagreen_patch
Ectodermal_dysplasia_trichoodontoonychial_type	Abnormality_of_the_nose	Abnormal_eyelash_morphology	Hypodontia	Melanocytic_nevus	Hypotrichosis	Sparse_body_hair	Abnormality_of_dental_morphology	Aplasia/Hypoplasia_of_the_nipples	Irregular_hyperpigmentation_of_back	Abnormal_toenail_morphology	Lipoatrophy	Aplasia/Hypoplasia_of_the_eyebrow
EEC_syndrome	Hypospadias	Urethral_atresia	Vesicoureteral_reflux	Hydronephrosis	Cleft_palate	Oral_cleft	Xerostomia	Abnormality_of_the_inner_ear	Abnormality_of_the_middle_ear	Sensorineural_hearing_impairment	Choanal_atresia	Keratitis	Blepharitis	Sparse_eyebrow	Thick_eyebrow	Photophobia	Entropion	Lacrimation_abnormality	Carious_teeth	Taurodontia	Abnormality_of_dental_eNAME	Microdontia	Hypoplasia_of_the_thymus	Growth_hormone_deficiency	Anterior_hypopituitarism	Dry_skin	Hyperkeratosis	Split_hand	Intellectual_disability	Toe_syndactyly	Nail_pits	Split_foot	Coarse_hair	Fine_hair	Slow-growing_hair	Lymphoma	Nevus	Short_stature	Finger_syndactyly	Aplasia/Hypoplasia_of_the_nipples	Generalized_hypopigmentation	Aplasia/Hypoplasia_of_the_skin	Nail_dystrophy	External_ear_malformation	Renal_hypoplasia/aplasia	Aplasia/Hypoplasia_of_the_thumb	Proximal_placement_of_thumb	Reduced_number_of_teeth	Aplasia/Hypoplasia_of_the_breasts
EEM_syndrome	Strabismus	Retinopathy	Abnormality_of_vision	Carious_teeth	Widely_spaced_teeth	Selective_tooth_agenesis	Absent_eyebrow	Sparse_body_hair	Finger_syndactyly	Abnormality_of_dental_morphology	Abnormality_of_retinal_pigmentation	Macular_dystrophy	Ectrodactyly	Abnormality_of_the_eye	Microdontia	Sparse_scalp_hair
Ectrodactyly-polydactyly_syndrome	Brachydactyly	Postaxial_hand_polydactyly	Abnormality_of_the_metacarpal_bones	Finger_syndactyly	Symphalangism_affecting_the_phalanges_of_the_hand	Ectrodactyly	Camptodactyly_of_finger
Edinburgh_malformation_syndrome	Narrow_mouth	Thin_vermilion_border	Hydrocephalus	Micrognathia	Low-set_ears	Choanal_atresia	Anteverted_nares	Synophrys	Hirsutism	Brushfield_spots	Slender_finger	Intellectual_disability	Seizures	Hypertonia	Joint_stiffness	Failure_to_thrive	Abnormality_of_the_voice	Frontal_bossing	Respiratory_insufficiency	Low_posterior_hairline	Generalized_hirsutism	Abnormality_of_neuronal_migration	Downturned_corners_of_mouth	Short_nose	Accelerated_skeletal_maturation	Aplasia/Hypoplasia_affecting_the_eye	Ulnar_deviation_of_finger	Long_fingers
Indomethacin_embryofetopathy	Multicystic_kidney_dysplasia	Renal_insufficiency	Abnormal_renal_tubule_morphology	Nephropathy	Oligohydramnios	Premature_birth	Ventricular_septal_defect	Atrial_septal_defect	Cardiomyopathy	Hydrops_fetalis	Abnormality_of_coagulation	Respiratory_insufficiency
Fetal_iodine_syndrome	Sensorineural_hearing_impairment	Strabismus	Nystagmus	Hypothyroidism	Intellectual_disability	Spastic_diplegia	Hemiplegia/hemiparesis
Fetal_valproate_spectrum_disorder	Narrow_mouth	Thin_vermilion_border	Epicanthus	Long_philtrum	Depressed_nasal_ridge	Omphalocele	Downturned_corners_of_mouth	Short_nose
Aminopterin/methotrexate_embryofetopathy	Cleft_palate	Hydrocephalus	Microcephaly	Mandibular_prognathia	Hypertelorism	Low-set_posteriorly_rotated_ears	Wide_nasal_bridge	Proptosis	Abnormal_fingernail_morphology	Holoprosencephaly	Intrauterine_growth_retardation	Epicanthus	Micrognathia	Ventricular_septal_defect	Tetralogy_of_Fallot	Situs_inversus_totalis	Small_nail	Talipes	Encephalocele	Anencephaly	Meningocele	Skeletal_dysplasia	Micromelia	Mesomelia	Short_stature	Pulmonary_artery_atresia	Finger_syndactyly	Aplasia/Hypoplasia_of_the_cerebellum	Aplasia/Hypoplasia_of_the_corpus_callosum	Aplasia/Hypoplasia_of_the_thumb	Underdeveloped_supraorbital_ridges	Spinal_dysraphism	Non-midline_cleft_lip
Diaphragmatic_defect-limb_deficiency-skull_defect_syndrome	Abnormal_morphology_of_female_internal_genitalia	Congenital_diaphragmatic_hernia	Abnormality_of_the_scapula	Omphalocele	Pulmonary_hypoplasia	Abnormality_of_the_lower_limb	Abnormality_of_the_upper_limb	Abnormality_of_femur_morphology	Clinodactyly_of_the_5th_finger	Decreased_skull_ossification	Finger_syndactyly	Aplasia/Hypoplasia_of_the_fibula	Aplasia/Hypoplasia_of_the_ulna	Aplasia/Hypoplasia_of_the_radius	Aplasia/hypoplasia_of_the_humerus	Upper_limb_asymmetry
Donnai-Barrow_syndrome	Proteinuria	Abnormality_of_the_uterus	Macrocephaly	Wide_anterior_fontanel	Hypertelorism	Broad_forehead	Widow's_peak	Posteriorly_rotated_ears	Sensorineural_hearing_impairment	Downslanted_palpebral_fissures	Proptosis	Progressive_visual_loss	Retinal_detachment	Myopia	Retinal_dystrophy	Iris_coloboma	Congenital_diaphragmatic_hernia	Bicornuate_uterus	Intellectual_disability	Seizures	Global_developmental_delay	Umbilical_hernia	Omphalocele	Ventricular_septal_defect	Intestinal_malrotation	Short_nose	Depressed_nasal_bridge	Aplasia/Hypoplasia_of_the_corpus_callosum
Craniosynostosis_Herrmann-Opitz_type	Cleft_palate	Brachycephaly	Turricephaly	Malar_flattening	Hypertelorism	Micrognathia	Convex_nasal_ridge	Webbed_neck	Abnormality_of_the_ribs	Abnormality_of_the_urethra	Brachydactyly	Split_hand	Craniosynostosis	Intrauterine_growth_retardation	Oligohydramnios	Micromelia	Short_nose	Short_stature	Finger_syndactyly	Aplasia/Hypoplasia_of_the_lungs	Microtia	Abnormality_of_the_antihelix	Abnormality_of_the_upper_urinary_tract	Cognitive_impairment
Nodular_neuronal_heterotopia	Seizures	Abnormality_of_neuronal_migration	EEG_abnormality
Isolated_hemihyperplasia	Inguinal_hernia	Cryptorchidism	Abnormality_of_the_dentition	Facial_asymmetry	Intellectual_disability_mild	Hemihypertrophy	Asymmetry_of_the_thorax	Myelomeningocele	Malformation_of_the_heart_and_great_vessels	Scoliosis	Nephroblastoma	Impaired_pain_sensation
46_XX_ovotesticular_disorder_of_sex_development	Abnormal_morphology_of_female_internal_genitalia	Abnormality_of_male_internal_genitalia	Cryptorchidism	Scrotal_hypoplasia	Hypospadias	Bifid_scrotum	Ambiguous_genitalia	Abnormality_of_the_uterus	Decreased_fertility	Polycystic_ovaries	Hypoplasia_of_penis	True_hermaphroditism	Abnormal_scrotal_rugation	Urogenital_sinus_anomaly
Hern√°ndez-Aguirre_Negrete_syndrome	Wide_mouth	Round_face	Low-set_posteriorly_rotated_ears	Bulbous_nose	Delayed_puberty	Seizures	Global_developmental_delay	Obesity	Deep_philtrum	EEG_abnormality
Short_stature-craniofacial_anomalies-genital_hypoplasia_syndrome	Abnormality_of_the_dentition	Cleft_palate	Trigonocephaly	Microcephaly	Epicanthus	Microretrognathia	Hypertelorism	Low-set_posteriorly_rotated_ears	Short_neck	Downslanted_palpebral_fissures	Hypothyroidism	Delayed_puberty	Arachnodactyly	Triphalangeal_thumb	Intellectual_disability	Limitation_of_joint_mobility	Frontal_bossing	Malformation_of_the_heart_and_great_vessels	Short_stature	Ectopic_anus	Finger_syndactyly	Abnormal_retinal_vascular_morphology	High_hypermetropia	Microtia	Amniotic_constriction_ring	Short_distal_phalanx_of_finger	Flat_face	Camptodactyly_of_finger
HEC_syndrome	Developmental_cataract	Abnormality_of_the_pharynx	Abnormal_pupil_morphology	Communicating_hydrocephalus	Polyhydramnios	Premature_birth	Cardiomyopathy	Endocardial_fibroelastosis	Respiratory_insufficiency	Abnormal_retinal_vascular_morphology	Arrhythmia	Vaginal_hydrocele
Diffuse_neonatal_hemangiomatosis	Renal_insufficiency	Abnormality_of_the_vagina	Abnormal_skull_morphology	Ascites	Polyhydramnios	Abnormality_of_the_voice	Premature_birth	Patent_ductus_arteriosus	Hydrops_fetalis	Thrombocytopenia	Anemia	Abnormality_of_coagulation	Abnormality_of_metabolism/homeostasis	Hepatomegaly	Malformation_of_the_heart_and_great_vessels	Hypercalcemia	Hemangiomatosis	Renal_hypoplasia/aplasia	Visceral_angiomatosis
Cystic_hamartoma_of_lung_and_kidney	Multicystic_kidney_dysplasia	Hypertension	Respiratory_insufficiency	Recurrent_respiratory_infections	Pulmonary_fibrosis
Hip_dysplasia_Beukes_type	Hip_dysplasia	Scoliosis	Osteoarthritis	Kyphosis	Coxa_vara	Abnormality_of_bone_mineral_density	Abnormality_of_epiphysis_morphology	Broad_femoral_neck	Abnormal_ossification_involving_the_femoral_head_and_neck	Abnormality_of_the_epiphysis_of_the_femoral_head	Abnormal_bone_ossification
Harrod_syndrome	Multicystic_kidney_dysplasia	Cryptorchidism	Hypospadias	Narrow_mouth	High_palate	Microcephaly	Narrow_face	Long_face	Pointed_chin	Protruding_ear	Cataract	Hypotelorism	Dental_malocclusion	Hypopigmented_skin_patches	Arachnodactyly	Intellectual_disability	Seizures	Failure_to_thrive	Intrauterine_growth_retardation	Cerebral_cortical_atrophy	Abnormality_of_pelvic_girdle_bone_morphology	Scoliosis	Kyphosis	Abnormality_of_the_shoulder	Long_nose	Joint_hyperflexibility
Hartsfield_syndrome	Cleft_palate	Hypertelorism	Low-set_posteriorly_rotated_ears	Downslanted_palpebral_fissures	Telecanthus	Ptosis	Microphthalmia	Split_hand	Craniosynostosis	Intrauterine_growth_retardation	Encephalocele	Respiratory_insufficiency	Depressed_nasal_bridge	Aplasia/Hypoplasia_of_the_radius	Lobar_holoprosencephaly	Aplasia/Hypoplasia_of_the_corpus_callosum	Non-midline_cleft_lip
Hall-Riggs_syndrome	Wide_mouth	Microcephaly	Epicanthus	Hypertelorism	Wide_nasal_bridge	Prominent_nose	Anteverted_nares	Abnormality_of_dental_eNAME	Delayed_eruption_of_teeth	Platyspondyly	Abnormality_of_the_metaphysis	Brachydactyly	Seizures	Absent_speech	Joint_stiffness	Failure_to_thrive	Nausea_and_vomiting	Coarse_hair	Slow-growing_hair	Scoliosis	Downturned_corners_of_mouth	Delayed_skeletal_maturation	Short_stature	Abnormality_of_epiphysis_morphology	Limb_undergrowth	Intellectual_disability_severe	Severe_global_developmental_delay	Thick_vermilion_border	Thick_hair
Dysmorphism-pectus_carinatum-joint_laxity_syndrome	Malar_flattening	Full_cheeks	Convex_nasal_ridge	Depressed_nasal_ridge	Telecanthus	Pectus_carinatum	Deep_philtrum	Frontal_bossing	Genu_valgum	Joint_hyperflexibility	Tented_upper_lip_vermilion
Hallux_varus-preaxial_polysyndactyly_syndrome	Sandal_gap	Clinodactyly_of_the_5th_finger
Hallermann-Streiff_syndrome	Cryptorchidism	Abnormality_of_the_tongue	Narrow_mouth	Glossoptosis	Abnormality_of_the_dentition	Abnormality_of_the_fontanelles_or_cranial_sutures	Brachycephaly	Microcephaly	Malar_flattening	Micrognathia	Underdeveloped_nasal_alae	Convex_nasal_ridge	Choanal_atresia	Strabismus	Glaucoma	Visual_impairment	Telecanthus	Developmental_cataract	Sparse_eyebrow	Myopia	Uveitis	Microphthalmia	Nystagmus	Sparse_eyelashes	Natal_tooth	Short_ribs	Hypothyroidism	Rib_exostoses	Abnormal_skull_morphology	Hypotrichosis	Intellectual_disability	Cerebellar_hypoplasia	Alopecia	Congestive_heart_failure	Short_foot	Frontal_bossing	Respiratory_insufficiency	Sparse_body_hair	Malformation_of_the_heart_and_great_vessels	High_narrow_palate	Recurrent_fractures	Tracheomalacia	Abdominal_situs_inversus	Proportionate_short_stature	Clinodactyly_of_the_5th_finger	Dermal_atrophy	Reduced_bone_mineral_density	Abnormality_of_hair_texture	Increased_number_of_teeth
Greig_cephalopolysyndactyly_syndrome	Hydrocephalus	Macrocephaly	Hypertelorism	High_forehead	Wide_nasal_bridge	Telecanthus	Congenital_diaphragmatic_hernia	Postaxial_hand_polydactyly	Preaxial_hand_polydactyly	Seizures	Intellectual_disability_mild	Agenesis_of_corpus_callosum	Craniosynostosis	Umbilical_hernia	Toe_syndactyly	Postaxial_foot_polydactyly	Preaxial_foot_polydactyly	Frontal_bossing	Accelerated_skeletal_maturation	Finger_syndactyly	Broad_hallux_phalanx	Broad_thumb
Acromesomelic_dysplasia_Grebe_type	Brachydactyly	Postaxial_hand_polydactyly	Joint_stiffness	Death_in_infancy	Short_foot	Short_toe	Skeletal_dysplasia	Micromelia	Fibular_hypoplasia	Synostosis_of_carpal_bones	Short_tibia	Aplasia/Hypoplasia_involving_the_metacarpal_bones	Bowing_of_the_long_bones	Tarsal_synostosis	Disproportionate_short-limb_short_stature	Aplasia/Hypoplasia_of_the_thumb	Sarcoma	Aplasia_of_the_middle_phalanges_of_the_toes
Grubben-de_Cock-Borghgraef_syndrome	Abnormality_of_the_dentition	Round_face	Short_neck	Abnormality_of_eye_movement	Blue_sclerae	Delayed_speech_and_language_development	Dry_skin	Eczema	Seizures	Muscular_hypotonia	Global_developmental_delay	Reduced_tendon_reflexes	Partial_agenesis_of_the_corpus_callosum	Deviation_of_finger	Small_hand
Gordon_syndrome	Cryptorchidism	Cleft_palate	High_palate	Facial_asymmetry	Hearing_impairment	Pectus_excavatum	Limitation_of_joint_mobility	Talipes	Scoliosis	Decreased_muscle_mass	Clinodactyly_of_the_5th_finger	Short_stature	Finger_syndactyly	Camptodactyly_of_finger
Focal_dermal_hypoplasia	Multicystic_kidney_dysplasia	Inguinal_hernia	Horseshoe_kidney	Hydronephrosis	Abnormality_of_the_dentition	Pointed_chin	Facial_asymmetry	Hearing_impairment	Low-set_ears	Abnormality_of_the_middle_ear	Narrow_nasal_bridge	Strabismus	Chorioretinal_coloboma	Microphthalmia	Iris_coloboma	Abnormality_of_dental_eNAME	Short_ribs	Congenital_diaphragmatic_hernia	Short_clavicles	Thin_skin	Abnormality_of_skin_pigmentation	Abnormal_palmar_dermatoglyphics	Ectopia_lentis	Hand_polydactyly	Split_hand	Subcutaneous_nodule	Umbilical_hernia	Omphalocele	Diastasis_recti	Alopecia	Abnormality_of_the_nail	Ventricular_septal_defect	Patent_ductus_arteriosus	Abnormal_cardiac_septum_morphology	Toe_syndactyly	Split_foot	Gastroesophageal_reflux	Abdominal_pain	Duodenal_atresia	Spina_bifida	Scoliosis	Dermal_atrophy	Abnormality_of_the_pulmonary_vasculature	Abnormality_of_epiphysis_morphology	Finger_syndactyly	Abnormality_of_dental_morphology	Acute_hepatic_failure	Aplasia/Hypoplasia_of_the_lungs	Hypoplasia_of_the_iris
Grant_syndrome	Abnormal_palate_morphology	Large_fontanelles	Brachycephaly	Facial_asymmetry	Micrognathia	Blue_sclerae	Abnormality_of_the_ribs	Narrow_chest	Sprengel_anomaly	Skin_dimple_over_apex_of_long_bone_angulation	Muscular_hypotonia	Joint_dislocation	Frontal_bossing	Abnormality_of_pelvic_girdle_bone_morphology	Wormian_bones	Abnormal_cortical_bone_morphology	Short_stature	Decreased_skull_ossification	Depressed_nasal_bridge	Joint_hyperflexibility	Bowing_of_the_long_bones	Open_bite	Abnormality_of_the_glenoid_fossa	Flat_face	Large_face
Gorlin-Chaudhry-Moss_syndrome	Abnormality_of_the_dentition	Brachycephaly	Low_anterior_hairline	Hypertelorism	Hypoplasia_of_the_maxilla	Conductive_hearing_impairment	Abnormality_of_the_eye	Astigmatism	Abnormal_eyelid_morphology	Abnormality_of_vision	Upper_eyelid_coloboma	Nystagmus	Sclerocornea	Oligodontia	Abnormal_skull_morphology	Abnormality_of_the_metacarpal_bones	Intellectual_disability_mild	Umbilical_hernia	Patent_ductus_arteriosus	Abnormality_of_the_foot	Coarse_hair	Generalized_hirsutism	Short_stature	Coronal_craniosynostosis	Congenital_craniofacial_dysostosis	Short_distal_phalanx_of_finger	Underdeveloped_supraorbital_ridges	Aplasia/Hypoplasia_of_the_nasal_bone
Glaucoma-sleep_apnea_syndrome	Glaucoma	Respiratory_insufficiency	Sleep_apnea
Glaucoma-ectopia_lentis-microspherophakia-stiff_joints-short_stature_syndrome	Glaucoma	Ectopia_lentis	Short_stature
Multinodular_goiter-cystic_kidney-polydactyly_syndrome	Multicystic_kidney_dysplasia	Postaxial_hand_polydactyly	Triphalangeal_thumb	Preaxial_foot_polydactyly	Multinodular_goiter
GMS_syndrome	Microcephaly	Epicanthus	Low-set_ears	Downslanted_palpebral_fissures	Rieger_anomaly	Intellectual_disability	Premature_birth	Respiratory_insufficiency	Short_stature	Preauricular_pit	Tricuspid_regurgitation	Depressed_nasal_bridge	Feeding_difficulties_in_infancy
Prominent_glabella-microcephaly-hypogenitalism_syndrome	Cryptorchidism	Scrotal_hypoplasia	Hydronephrosis	Microcephaly	Dolichocephaly	Micrognathia	Posteriorly_rotated_ears	Overfolded_helix	Macrotia	Prominent_nasal_bridge	Underdeveloped_nasal_alae	Short_neck	Thickened_nuchal_skin_fold	Brachydactyly	Seizures	Global_developmental_delay	Hypertonia	Growth_delay	Intrauterine_growth_retardation	Abnormality_of_the_voice	Prominent_glabella	Ventriculomegaly	Highly_arched_eyebrow	Short_nose	Wide_intermamillary_distance	Bilateral_single_transverse_palmar_creases	Hypoplasia_of_penis	Abnormal_hair_pattern	Short_palpebral_fissure	Camptodactyly_of_finger	Cognitive_impairment
German_syndrome	Cryptorchidism	Ambiguous_genitalia	Open_mouth	Oral_cleft	High_palate	Everted_lower_lip_vermilion	Brachycephaly	Dolichocephaly	Micrognathia	High_forehead	Hearing_abnormality	Wide_nasal_bridge	Short_neck	Strabismus	Downslanted_palpebral_fissures	Abnormal_eyebrow_morphology	Synophrys	Lymphedema	Intellectual_disability	Muscular_hypotonia	Global_developmental_delay	Limitation_of_joint_mobility	Tetralogy_of_Fallot	Abnormal_cardiac_septum_morphology	Dysphagia	Neurological_speech_impairment	Hypokinesia	Arthrogryposis_multiplex_congenita	Short_stature	Depressed_nasal_bridge	Midface_retrusion	Camptodactyly_of_finger
Geroderma_osteodysplastica	Malar_flattening	Mandibular_prognathia	Abnormality_of_the_eye	Microcornea	Abnormality_of_vision	Pectus_carinatum	Platyspondyly	Osteoporosis	Thin_skin	Hyperextensible_skin	Muscular_hypotonia	Intellectual_disability_mild	Global_developmental_delay	Growth_delay	Redundant_skin	Pes_planus	Talipes	Scoliosis	Recurrent_fractures	Hip_dislocation	Vertebral_compression_fractures	Abnormal_form_of_the_vertebral_bodies	Severe_short_stature	Beaking_of_vertebral_bodies	Biconcave_vertebral_bodies	Joint_hyperflexibility	Abnormality_of_epiphysis_morphology	Prematurely_aged_appearance	Abnormal_bone_ossification	Hernia
Gemignani_syndrome	Abnormal_testis_morphology	Sensorineural_hearing_impairment	Delayed_puberty	Hypopigmented_skin_patches	Intellectual_disability	Ataxia	Hyperreflexia	Skeletal_muscle_atrophy	EMG_abnormality	Short_stature	Hemiplegia/hemiparesis	Impaired_pain_sensation	Hypoplasia_of_penis
Genitopalatocardiac_syndrome	Multicystic_kidney_dysplasia	Cryptorchidism	Male_pseudohermaphroditism	Hypospadias	Cleft_palate	Hydrocephalus	Microcephaly	Hypertelorism	Micrognathia	Low-set_ears	Wide_nasal_bridge	Downslanted_palpebral_fissures	Congenital_diaphragmatic_hernia	Brachydactyly	Postaxial_hand_polydactyly	Intrauterine_growth_retardation	Abnormal_cardiac_septum_morphology	Malformation_of_the_heart_and_great_vessels	Scoliosis	Downturned_corners_of_mouth	Kyphosis	Abnormality_of_the_gallbladder	Gonadal_dysgenesis_male	Abnormality_of_mesentery_morphology	Non-midline_cleft_lip
Gastrocutaneous_syndrome	Hypertelorism	Strabismus	Myopia	Upslanted_palpebral_fissure	Synophrys	Melanocytic_nevus	Multiple_lentigines	Coronary_artery_atherosclerosis	Hiatus_hernia	Peptic_ulcer	Depressed_nasal_bridge	Type_II_diabetes_mellitus	Multiple_cafe-au-lait_spots
Galloway-Mowat_syndrome	Proteinuria	Nephrotic_syndrome	Nephropathy	Abnormality_of_the_dentition	Microcephaly	Hypertelorism	Micrognathia	Macrotia	Hypotelorism	Adducted_thumb	Seizures	Muscular_hypotonia	Global_developmental_delay	Hypertonia	Pachygyria	Intrauterine_growth_retardation	Premature_birth	Hiatus_hernia	Abnormality_of_neuronal_migration	EEG_abnormality	Aqueductal_stenosis	Short_stature	Hemiplegia/hemiparesis	Abnormality_of_the_intervertebral_disk	Abnormality_of_immune_system_physiology	Camptodactyly_of_finger	Cognitive_impairment	Hypoplasia_of_the_ear_cartilage
GAPO_syndrome	Everted_lower_lip_vermilion	Hypertelorism	Broad_forehead	Long_philtrum	Micrognathia	High_forehead	Low-set_ears	Anteverted_nares	Sparse_eyebrow	Sparse_eyelashes	Delayed_eruption_of_teeth	Hyperextensible_skin	Alopecia	Frontal_bossing	Early_balding	Delayed_skeletal_maturation	Short_stature	Depressed_nasal_bridge	Joint_hyperflexibility	Prematurely_aged_appearance	Underdeveloped_supraorbital_ridges	Thick_nasal_alae	Midface_retrusion	Palpebral_edema	Abnormal_palate_morphology	Mandibular_prognathia	Glaucoma	Visual_impairment	Keratoconus	Abnormality_of_the_thorax	Abnormality_of_the_clavicle	Abnormality_of_the_metaphysis	Umbilical_hernia	Abnormality_of_pelvic_girdle_bone_morphology	Abnormal_form_of_the_vertebral_bodies	Skin_tags	Abnormality_of_the_cerebral_vasculature	Hypogonadism	Amenorrhea	Hearing_impairment	Choanal_atresia	Myopia	Nystagmus	Optic_atrophy	Nephrolithiasis	Oligospermia	Hemangioma	Hypopigmented_skin_patches	Growth_delay
Splenogonadal_fusion-limb_defects-micrognathia_syndrome	Inguinal_hernia	Cryptorchidism	Abnormal_palate_morphology	Narrow_palate	Micrognathia	Posteriorly_rotated_ears	Congenital_diaphragmatic_hernia	Abnormality_of_the_skin	Seizures	Plagiocephaly	Hip_dysplasia	Premature_birth	Anal_atresia	Abnormal_lung_lobation	Abnormality_of_neuronal_migration	Malformation_of_the_heart_and_great_vessels	Abnormality_of_the_knee	Abnormality_of_the_upper_limb	Abnormality_of_femur_morphology	Abnormality_of_fibula_morphology	Abnormality_of_the_wrist	Multiple_unerupted_teeth	Crowded_maxillary_incisors	Aplasia/Hypoplasia_of_the_lungs	Reduced_number_of_teeth	Cognitive_impairment	Lower_limb_asymmetry	Upper_limb_asymmetry
Posterior_fusion_of_lumbosacral_vertebrae-blepharoptosis_syndrome	Ptosis	Sacral_dimple	Joint_stiffness	Abnormal_form_of_the_vertebral_bodies	Posterior_fusion_of_lumbosacral_vertebrae	Tarsal_synostosis
Fryns_syndrome	Multicystic_kidney_dysplasia	Cryptorchidism	Hypospadias	Vesicoureteral_reflux	Hydronephrosis	Wide_mouth	Median_cleft_lip	Cleft_palate	High_palate	Coarse_facial_features	Hypertelorism	Broad_forehead	Long_philtrum	Micrognathia	Low-set_posteriorly_rotated_ears	Wide_nasal_bridge	Anteverted_nares	Short_neck	Thickened_nuchal_skin_fold	Microphthalmia	Narrow_chest	Congenital_diaphragmatic_hernia	Bicornuate_uterus	Intellectual_disability	Seizures	Agenesis_of_corpus_callosum	Dandy-Walker_malformation	Omphalocele	Polyhydramnios	Tetralogy_of_Fallot	Abnormal_cardiac_septum_morphology	Abnormal_aortic_morphology	Hypoplastic_fingernail	Gastroesophageal_reflux	Anal_atresia	Pulmonary_hypoplasia	Ventriculomegaly	Cerebral_cortical_atrophy	Duodenal_atresia	Aganglionic_megacolon	Intestinal_malrotation	Clinodactyly_of_the_5th_finger	Ectopic_anus	Wide_intermamillary_distance	Aplasia/Hypoplasia_of_the_nipples	Corneal_opacity	Short_distal_phalanx_of_finger	Tented_upper_lip_vermilion	Severe_global_developmental_delay
Blepharophimosis-ptosis-esotropia-syndactyly-short_stature_syndrome	Thick_lower_lip_vermilion	Mandibular_prognathia	Hypertelorism	Anosmia	Ptosis	Esotropia	Thick_eyebrow	Blepharophimosis	Synophrys	Abnormal_cranial_nerve_morphology	Highly_arched_eyebrow	Short_stature	Intellectual_disability_borderline
Frontofacionasal_dysplasia	Cleft_palate	Brachycephaly	Hypertelorism	Broad_forehead	Preauricular_skin_tag	Choanal_atresia	Bifid_nasal_tip	Depressed_nasal_ridge	Microcornea	Telecanthus	Ptosis	Cataract	Microphthalmia	Blepharophimosis	Iris_coloboma	Upper_eyelid_coloboma	Brushfield_spots	Epibulbar_dermoid	Subcutaneous_nodule	Facial_cleft	Hypoplasia_of_the_corpus_callosum	Encephalocele	Short_nose	Dimple_on_nasal_tip	Short_stature	Depressed_nasal_bridge	Hypoplasia_of_olfactory_tract	Absent_inner_eyelashes	Midface_retrusion	Non-midline_cleft_lip	Aplasia/Hypoplasia_of_the_eyebrow
Cole-Carpenter_syndrome	Turricephaly	Micrognathia	Downslanted_palpebral_fissures	Proptosis	Blue_sclerae	Abnormality_of_dental_eNAME	Delayed_eruption_of_teeth	Abnormality_of_the_ribs	Abnormality_of_the_metaphysis	Muscular_hypotonia	Global_developmental_delay	Communicating_hydrocephalus	Intrauterine_growth_retardation	Abnormality_of_the_voice	Frontal_bossing	Wormian_bones	Scoliosis	Skeletal_dysplasia	Recurrent_fractures	Kyphosis	Abnormal_form_of_the_vertebral_bodies	Short_stature	Joint_hyperflexibility	Crumpled_long_bones	Bowing_of_the_long_bones	Midface_retrusion
Foix-Chavany-Marie_syndrome	Abnormal_thumb_morphology	Seizures	Global_developmental_delay	Gait_disturbance	Absent_speech	Abnormality_of_the_voice	Maternal_diabetes	Cognitive_impairment
Flynn-Aird_syndrome	Progressive_sensorineural_hearing_impairment	Visual_impairment	Rod-cone_dystrophy	Cataract	Myopia	Carious_teeth	Dementia	Abnormality_of_the_thyroid_gland	Seizures	Ataxia	Joint_stiffness	Alopecia	Cerebral_cortical_atrophy	EEG_abnormality	Developmental_regression	Aphasia	Cerebral_calcification	Atherosclerosis	Scoliosis	Kyphosis	Skeletal_muscle_atrophy	Cachexia	Dermal_atrophy	Type_II_diabetes_mellitus	Impaired_pain_sensation	Primary_adrenal_insufficiency	Peripheral_neuropathy	Bone_cyst	Abnormality_of_movement	Skin_ulcer
FLOTCH_syndrome	Abnormal_eyelid_morphology	Blepharitis	Abnormal_eyelash_morphology	Photophobia	Sparse_eyelashes	Nephrolithiasis	Abnormality_of_the_nail	Neoplasm_of_the_skin	Inflammatory_abnormality_of_the_eye
Paraplegia-intellectual_disability-hyperkeratosis_syndrome	Sloping_forehead	Micrognathia	High_forehead	Astigmatism	Ptosis	Nystagmus	Palmoplantar_keratoderma	Brachydactyly	Arachnodactyly	Abnormal_fingernail_morphology	Intellectual_disability	Spasticity	Spastic_paraplegia	Hyperreflexia	Brisk_reflexes	Lower_limb_spasticity	Sparse_scalp_hair	Long_nose	Joint_hyperflexibility	Cone-shaped_epiphysis	Malar_prominence
Scalp-ear-nipple_syndrome	Small_earlobe	Abnormality_of_the_skin	Abnormality_of_the_scalp	Aplasia/Hypoplasia_of_the_nipples	Sparse_hair	Microtia	Abnormality_of_the_antihelix	Underdeveloped_antitragus	Underdeveloped_tragus	Breast_aplasia	Recurrent_urinary_tract_infections	Abnormality_of_the_dentition	Telecanthus	Cataract	Delayed_eruption_of_teeth	Hypertension	Abnormal_fingernail_morphology	Palpebral_edema	Type_I_diabetes_mellitus	Ureteral_duplication	Abnormality_of_the_kidney	Eyelid_coloboma	Hypohidrosis	Duplication_of_renal_pelvis	Pyelonephritis
Hepatic_fibrosis-renal_cysts-intellectual_disability_syndrome	Multicystic_kidney_dysplasia	Renal_cyst	Glossoptosis	Hearing_abnormality	Low-set_posteriorly_rotated_ears	Protruding_ear	Underdeveloped_nasal_alae	Anteverted_nares	Abnormality_of_the_eye	Strabismus	Abnormality_of_vision	Visual_impairment	Ptosis	Chorioretinal_coloboma	Blepharophimosis	Nystagmus	Intellectual_disability	Seizures	Hypertonia	Respiratory_insufficiency	Ventriculomegaly	Meningocele	Congenital_hepatic_fibrosis	Short_nose	Clinodactyly_of_the_5th_finger	Short_stature	Biparietal_narrowing	Abnormal_dermatoglyphics	Abnormality_of_movement
Juvenile_hyaline_fibromatosis	Gingival_fibromatosis	Gingival_overgrowth	Abnormality_of_the_face	Abnormal_skull_morphology	Abnormal_diaphysis_morphology	Joint_stiffness	Subcutaneous_nodule	Death_in_infancy	Abnormality_of_the_hair	Osteolysis	Skeletal_muscle_atrophy	Progressive_flexion_contractures	Aplasia/Hypoplasia_of_the_skin	Abnormality_of_the_gastrointestinal_tract	Papule	Skin_ulcer
Gingival_fibromatosis-progressive_deafness_syndrome	Gingival_fibromatosis	Gingival_overgrowth	Sensorineural_hearing_impairment	Delayed_eruption_of_teeth
Gingival_fibromatosis-hypertrichosis_syndrome	Abnormality_of_the_dentition	Gingival_fibromatosis	Gingival_overgrowth	Coarse_facial_features	Thick_eyebrow	Synophrys	Delayed_eruption_of_teeth	Hirsutism	Seizures	Ataxia	Generalized_hirsutism	EEG_abnormality	Cognitive_impairment
Gingival_fibromatosis-facial_dysmorphism_syndrome	Gingival_fibromatosis	Gingival_overgrowth	High_palate	Everted_lower_lip_vermilion	Macrocephaly	Hypertelorism	Underdeveloped_nasal_alae	Downslanted_palpebral_fissures	Thick_eyebrow	Synophrys	Delayed_eruption_of_teeth	Exaggerated_cupid's_bow	Depressed_nasal_bridge	Abnormality_of_dental_morphology
Macrosomia-microphthalmia-cleft_palate_syndrome	Abnormality_of_the_fontanelles_or_cranial_sutures	Broad_forehead	Microcornea	Microphthalmia	Large_for_gestational_age	Respiratory_insufficiency	Recurrent_respiratory_infections	Hepatomegaly	Abnormality_of_calvarial_morphology	Corneal_opacity	Median_cleft_palate
Hypo-_and_hypermelanotic_cutaneous_macules-retarded_growth-intellectual_disability_syndrome	Microcephaly	Abnormality_of_the_ribs	Melanocytic_nevus	Hypopigmented_skin_patches	Intellectual_disability	Short_stature	Irregular_hyperpigmentation	Macule
Ollier_disease	Precocious_puberty	Platyspondyly	Abnormality_of_the_metaphysis	Hemangioma	Joint_stiffness	Subcutaneous_nodule	Anemia	Abnormality_of_coagulation	Bone_pain	Neoplasm	Abnormal_cartilage_morphology	Osteolysis	Micromelia	Venous_thrombosis	Multiple_enchondromatosis	Chondrosarcoma	Sarcoma	Visceral_angiomatosis	Lymphangioma	Skin_ulcer
Hand-foot-genital_syndrome	Recurrent_urinary_tract_infections	Hypospadias	Ureteropelvic_junction_obstruction	Vesicoureteral_reflux	Abnormality_of_the_uterus	Strabismus	Abnormality_of_the_urethra	Bicornuate_uterus	Sacral_dimple	Postaxial_hand_polydactyly	Ventricular_septal_defect	Clinodactyly_of_the_5th_finger	Synostosis_of_carpal_bones	Spontaneous_abortion	Shortening_of_all_middle_phalanges_of_the_fingers	Abnormal_dermatoglyphics	Hallux_varus	Microtia	Proximal_placement_of_thumb	Short_thumb	Short_distal_phalanx_of_finger	Short_1st_metacarpal	Short_first_metatarsal	Short_hallux	Hypoplastic_fifth_toenail
Isolated_split_hand-split_foot_malformation	Sensorineural_hearing_impairment	Aniridia	Split_hand	Absent_hand	Finger_syndactyly	Oligodactyly
Familial_supernumerary_nipples	Abnormality_of_the_genitourinary_system	Supernumerary_nipple
McDonough_syndrome	Cryptorchidism	Abnormal_palate_morphology	Mandibular_prognathia	Hypertelorism	Short_philtrum	Prominent_supraorbital_ridges	Micrognathia	Low-set_posteriorly_rotated_ears	Macrotia	Protruding_ear	Underdeveloped_nasal_alae	Prominent_nose	Strabismus	Ptosis	Synophrys	Dental_malocclusion	Pectus_excavatum	Intellectual_disability	Malformation_of_the_heart_and_great_vessels	Scoliosis	Kyphosis	Short_stature	Cachexia	Bilateral_single_transverse_palmar_creases	Aplasia/Hypoplasia_of_the_abdominal_wall_musculature	Open_bite	Short_palpebral_fissure
Laurin-Sandrow_syndrome	Cryptorchidism	Hydrocephalus	Hypertelorism	Abnormality_of_the_nose	Underdeveloped_nasal_alae	Prominent_nose	Depressed_nasal_ridge	Abnormality_of_the_metacarpal_bones	Preaxial_hand_polydactyly	Triphalangeal_thumb	Intellectual_disability	Muscular_hypotonia	Limitation_of_joint_mobility	Toe_syndactyly	Preaxial_foot_polydactyly	Talipes	Short_columella	Downturned_corners_of_mouth	Abnormality_of_the_wrist	Finger_syndactyly	Aplasia/Hypoplasia_of_the_corpus_callosum	Tarsal_synostosis	Absent_tibia	Aplasia/Hypoplasia_of_the_thumb	Fibular_duplication	Mirror_image_polydactyly	Absent_radius	Limb_duplication
Early-onset_parkinsonism-intellectual_disability_syndrome	Macrocephaly	Strabismus	Intellectual_disability	Seizures	Frontal_bossing	Rigidity	Neurological_speech_impairment	Cogwheel_rigidity	Abnormality_of_movement
Leukonychia_totalis	Blepharitis	Abnormal_eyelash_morphology	Photophobia	Nephrolithiasis	Abnormal_fingernail_morphology	Type_II_diabetes_mellitus	Abnormal_toenail_morphology	Adenoma_sebaceum
Lowe-Kohn-Cohen_syndrome	Nephropathy	Preauricular_skin_tag	Sensorineural_hearing_impairment	Anal_atresia	Anorectal_anomaly
Cystic_fibrosis-gastritis-megaloblastic_anemia_syndrome	Hypospadias	Shawl_scrotum	Nephrotic_syndrome	Hypertelorism	Micrognathia	Macrotia	Wide_nasal_bridge	Deeply_set_eye	Telecanthus	Glandular_hypospadias	Intellectual_disability	Abnormal_erythrocyte_morphology	Megaloblastic_anemia	Frontal_bossing	Diarrhea	Recurrent_respiratory_infections	Folate-unresponsive_megaloblastic_anemia	Gastritis
Dislocation_of_the_hip-dysmorphism_syndrome	Inguinal_hernia	Abnormality_of_the_urinary_system	Narrow_mouth	Abnormal_palate_morphology	Malar_flattening	Epicanthus	Hypertelorism	Hearing_abnormality	Wide_nasal_bridge	Depressed_nasal_ridge	Anteverted_nares	Congenital_hip_dislocation	Patent_ductus_arteriosus	Abnormal_cardiac_septum_morphology	Abnormal_tricuspid_valve_morphology	Abnormality_of_the_knee	Deviation_of_finger	Joint_hyperflexibility	Premaxillary_Prominence	Abnormality_of_fontanelles
Macrocephaly-spastic_paraplegia-dysmorphism_syndrome	Wide_mouth	Thin_upper_lip_vermilion	Everted_lower_lip_vermilion	Macrocephaly	Coarse_facial_features	Mandibular_prognathia	Short_philtrum	Prominent_supraorbital_ridges	Broad_forehead	High_forehead	Deeply_set_eye	Thick_eyebrow	Synophrys	Intellectual_disability	Seizures	Spasticity	Gait_disturbance	Hyperreflexia	Truncal_obesity	Low_posterior_hairline	Scoliosis	Kyphosis	Short_nose	Thick_hair
Sanjad-Sakati_syndrome	Cryptorchidism	Abnormality_of_the_dentition	Thin_vermilion_border	Microcephaly	Long_philtrum	Micrognathia	High_forehead	Low-set_posteriorly_rotated_ears	Convex_nasal_ridge	Astigmatism	Deeply_set_eye	Abnormality_of_dental_eNAME	Hypoparathyroidism	Intellectual_disability	Seizures	Short_foot	Ventriculomegaly	Recurrent_respiratory_infections	Delayed_skeletal_maturation	Hypocalcemia	Hyperphosphatemia	Myopathy	Spinal_canal_stenosis	Short_stature	Intestinal_obstruction	Depressed_nasal_bridge	Cellular_immunodeficiency	Patchy_osteosclerosis	Corneal_opacity	Aplasia/Hypoplasia_affecting_the_eye	Congenital_hypoparathyroidism	External_ear_malformation	Hypoplasia_of_penis	Severe_intrauterine_growth_retardation	Postnatal_growth_retardation	Small_hand
Kabuki_syndrome	Cryptorchidism	Hypospadias	Ureteropelvic_junction_obstruction	Duplicated_collecting_system	Hydronephrosis	Abnormality_of_the_dentition	Cleft_palate	Oral_cleft	High_palate	Hydrocephalus	Microcephaly	Mask-like_facies	Preauricular_skin_tag	Macrotia	Conductive_hearing_impairment	Sensorineural_hearing_impairment	Protruding_ear	Microcornea	Strabismus	Ptosis	Long_eyelashes	Coloboma	Blue_sclerae	Nystagmus	Hypodontia	Widely_spaced_teeth	Microdontia	Congenital_diaphragmatic_hernia	Precocious_puberty	Seizures	Muscular_hypotonia	Failure_to_thrive	Obesity	Abnormal_cardiac_septum_morphology	Coarctation_of_aorta	Short_columella	Ventriculomegaly	Cerebral_cortical_atrophy	EEG_abnormality	Highly_arched_eyebrow	Scoliosis	Recurrent_infections	Hip_dislocation	Hemivertebrae	Abnormal_form_of_the_vertebral_bodies	Butterfly_vertebrae	Short_stature	Crossed_fused_renal_ectopia	Sparse_lateral_eyebrow
Non-epidermolytic_palmoplantar_keratoderma	Pruritus	Diffuse_palmoplantar_keratoderma	Abnormal_blistering_of_the_skin	Erythema	Papule	Skin_ulcer
Epidermolysis_bullosa_simplex_with_anodontia/hypodontia	Abnormality_of_the_face	Mandibular_prognathia	Short_philtrum	Hearing_impairment	Myopia	Abnormality_of_dental_eNAME	Delayed_eruption_of_teeth	Ectopia_lentis	Abnormal_fingernail_morphology	Alopecia	Hypoplastic_toenails	Anemia	Sparse_scalp_hair	Fatigable_weakness	Abnormal_blistering_of_the_skin	Reduced_number_of_teeth	Cognitive_impairment	Toenail_dysplasia	Fingernail_dysplasia
Keratoderma_hereditarium_mutilans	Hypogonadotrophic_hypogonadism	Cleft_palate	Hearing_impairment	Sensorineural_hearing_impairment	Hyperkeratosis	Alopecia	Abnormality_of_the_nail	Abnormality_of_the_spinal_cord	Osteolysis	Autoamputation_of_digits	Honeycomb_palmoplantar_keratoderma	Ichthyosis	Abnormal_toenail_morphology	Amniotic_constriction_ring	Cognitive_impairment	Self-injurious_behavior	Papule
Familial_partial_lipodystrophy_Dunnigan_type	Polycystic_ovaries	Round_face	Diabetes_mellitus	Insulin_resistance	Secondary_amenorrhea	Acanthosis_nigricans	Thin_skin	Xanthomatosis	Hepatic_steatosis	Abnormality_of_the_nail	Congestive_heart_failure	Hypertrophic_cardiomyopathy	Coronary_artery_atherosclerosis	Pancreatitis	Splenomegaly	Hypertriglyceridemia	Generalized_hirsutism	Hepatomegaly	Atherosclerosis	Myopathy	Myalgia	Loss_of_subcutaneous_adipose_tissue_in_limbs	Skeletal_muscle_hypertrophy	Abnormality_of_complement_system	Advanced_eruption_of_teeth	Cranial_nerve_paralysis	Aplasia/Hypoplasia_of_the_skin	Lipodystrophy	Abnormality_of_skeletal_muscle_fiber_size	Lipoatrophy	Eclampsia	Dysmenorrhea	Cellulitis	Glomerulopathy
Congenital_bowing_of_long_bones	Hyperlordosis	Bowing_of_the_long_bones
Congenital_velopharyngeal_incompetence	Abnormal_palate_morphology	Velopharyngeal_insufficiency	Hearing_impairment	Abnormality_of_the_pharynx	Abnormality_of_the_voice
Isotretinoin_syndrome	Cleft_palate	Micrognathia	Abnormality_of_the_outer_ear	Sacral_dimple	Muscular_hypotonia	Reduced_tendon_reflexes	Hypoplastic_toenails	Spina_bifida_occulta	Biparietal_narrowing	Depressed_nasal_bridge	Microtia	Cognitive_impairment
Familial_articular_hypermobility_syndrome	Inguinal_hernia	Congenital_hip_dislocation	Abnormality_of_the_knee	Abnormality_of_femur_morphology	Patellar_dislocation	Shoulder_dislocation	Joint_hyperflexibility	Abnormality_of_the_elbow
Absence_deformity_of_leg-cataract_syndrome	Visual_impairment	Cataract	Anal_atresia	Scoliosis	Abnormality_of_the_lower_limb	Abnormality_of_femur_morphology	Hyperlordosis	Abnormality_of_epiphysis_morphology	Lower_limb_undergrowth
Jung_syndrome	Abnormality_of_the_genital_system	Microcephaly	Round_face	Wide_nasal_bridge	Telecanthus	Hypothyroidism	Abnormal_skull_morphology	Dry_skin	Intellectual_disability	Muscular_hypotonia	Cerebellar_hypoplasia	Low_posterior_hairline	Recurrent_respiratory_infections	Tracheal_stenosis	Abnormal_form_of_the_vertebral_bodies	Depressed_nasal_bridge	Aplasia/Hypoplasia_of_the_corpus_callosum
Johanson-Blizzard_syndrome	Hypospadias	Hydronephrosis	Abnormality_of_the_vagina	Abnormality_of_the_dentition	Microcephaly	Sensorineural_hearing_impairment	Underdeveloped_nasal_alae	Lacrimation_abnormality	Oligodontia	Delayed_eruption_of_teeth	Microdontia	Diabetes_mellitus	Edema	Absent_lacrimal_punctum	Intellectual_disability	Muscular_hypotonia	Failure_to_thrive	Intrauterine_growth_retardation	Death_in_infancy	Anteriorly_placed_anus	Alopecia	Dextrocardia	Abnormal_cardiac_septum_morphology	Abnormality_of_the_pancreas	Exocrine_pancreatic_insufficiency	Anemia	Anal_atresia	Malabsorption	Malformation_of_the_heart_and_great_vessels	Delayed_skeletal_maturation	Hypoproteinemia	Short_nose	Short_stature	Abnormality_of_the_nares	Hypoplasia_of_penis	Abnormality_of_the_female_genitalia	Abnormal_hair_pattern
Harlequin_ichthyosis	Hearing_abnormality	Depressed_nasal_ridge	Cataract	Ectropion	Hyperkeratosis	Erythroderma	Hand_polydactyly	Limitation_of_joint_mobility	Sudden_cardiac_death	Foot_polydactyly	Dehydration	Malignant_hyperthermia	Respiratory_insufficiency	Recurrent_respiratory_infections	Congenital_ichthyosiform_erythroderma	Ichthyosis	Eclabion	Self-injurious_behavior
Congenital_unilateral_pulmonary_hypoplasia	Congenital_diaphragmatic_hernia	Abnormality_of_the_pulmonary_artery	Aplasia/Hypoplasia_of_the_lungs	Anomalous_pulmonary_venous_return
Hypospadias-intellectual_disability_Goldblatt_type_syndrome	Hypospadias	Abnormal_palate_morphology	Trigonocephaly	Microcephaly	Low-set_posteriorly_rotated_ears	Overfolded_helix	Convex_nasal_ridge	Synophrys	Abnormal_fingernail_morphology	Intellectual_disability	Muscular_hypotonia	Joint_stiffness	Clinodactyly_of_the_5th_finger	Abnormal_toenail_morphology	Midface_retrusion
Fused_mandibular_incisors	Abnormality_of_the_dentition	Advanced_eruption_of_teeth
Neuronal_intranuclear_inclusion_disease	Abnormality_of_the_pharynx	Ophthalmoplegia	Nystagmus	Optic_atrophy	Behavioral_abnormality	Dementia	Seizures	Ataxia	Dysarthria	Hypertonia	Hyperreflexia	Neurological_speech_impairment	EEG_abnormality	Scoliosis	Spina_bifida_occulta	Abnormal_form_of_the_vertebral_bodies	EMG_abnormality	Abnormality_of_movement
Primary_basilar_invagination	Short_neck	Abnormality_of_eye_movement	Abnormality_of_the_pharynx	Abnormality_of_the_voice	Platybasia	Abnormality_of_the_cervical_spine	Abnormal_vertebral_morphology	Basilar_impression
Familial_isolated_hypoparathyroidism	Nephropathy	Cataract	Abnormality_of_dental_eNAME	Delayed_eruption_of_teeth	Hypoparathyroidism	Seizures	Cerebral_calcification	Hypocalcemia	Myopathy	Short_stature	Arrhythmia	Abnormality_of_calcium-phosphate_metabolism
Megacystis-microcolon-intestinal_hypoperistalsis_syndrome	Multicystic_kidney_dysplasia	Megacystis	Cryptorchidism	Hydroureter	Death_in_infancy	Umbilical_hernia	Omphalocele	Polyhydramnios	Nausea_and_vomiting	Malformation_of_the_heart_and_great_vessels	Intestinal_malrotation	Abdominal_distention	Microcolon	Abnormality_of_the_gastrointestinal_tract	Neoplasm_of_the_heart	Hypoperistalsis	Sepsis
Hypodontia-dysplasia_of_nails_syndrome	Polycystic_ovaries	Abnormality_of_the_dentition	Everted_lower_lip_vermilion	Hypodontia	Delayed_eruption_of_teeth	Conical_tooth	Abnormal_fingernail_morphology	Abnormality_of_the_nail	Hypoplastic_toenails	Hypoplastic_fingernail	Fragile_nails	Fine_hair	Agenesis_of_permanent_teeth	Abnormality_of_dental_morphology	Ridged_fingernail	Thin_toenail
Dilated_cardiomyopathy-hypergonadotropic_hypogonadism_syndrome	Polycystic_ovaries	Wide_nasal_bridge	Ptosis	Hypergonadotropic_hypogonadism	Precocious_puberty	Dilated_cardiomyopathy	Aplasia_of_the_phalanges_of_the_3rd_toe
Fibulo-ulnar_hypoplasia-renal_anomalies_syndrome	Cryptorchidism	Shawl_scrotum	Renal_hypoplasia	Hypertelorism	Micrognathia	Protruding_ear	Wide_nasal_bridge	Downslanted_palpebral_fissures	Single_umbilical_artery	Polyhydramnios	Premature_birth	Ventricular_septal_defect	Frontal_bossing	Malformation_of_the_heart_and_great_vessels	Hypoplasia_of_the_ulna	Short_long_bone	Depressed_nasal_bridge	Finger_syndactyly	Aplasia/Hypoplasia_of_the_fibula	Hypoplasia_of_penis	Aplasia_of_the_proximal_phalanges_of_the_hand	Abnormality_of_mesentery_morphology
Primary_pulmonary_hypoplasia	Pulmonary_hypoplasia	Cyanosis	Restrictive_ventilatory_defect	Apnea	Neonatal_respiratory_distress	Tachypnea	Hypoxemia	Abnormal_breath_sound	Cleft_palate	Microcephaly	Epicanthus	Micrognathia	Low-set_ears	Failure_to_thrive	Intrauterine_growth_retardation	Dextrocardia	Secundum_atrial_septal_defect	Recurrent_respiratory_infections	Abnormal_trachea_morphology	Patellar_hypoplasia	Abnormal_hemidiaphragm_morphology
Cerebellar_hypoplasia-tapetoretinal_degeneration_syndrome	Visual_impairment	Abnormal_electroretinogram	Nystagmus	Optic_atrophy	Ataxia	Muscular_hypotonia	Cerebellar_hypoplasia	Abnormality_of_retinal_pigmentation	Cognitive_impairment
Radial_hypoplasia-triphalangeal_thumbs-hypospadias-maxillary_diastema_syndrome	Hypospadias	Mandibular_prognathia	Micromelia	Hypoplasia_of_the_radius	Nonopposable_triphalangeal_thumb	Abnormal_dermatoglyphics
Familial_primary_hypomagnesemia_with_hypercalciuria_and_nephrocalcinosis_with_severe_ocular_involvement	Inguinal_hernia	Nephropathy	Myopia	Chorioretinal_coloboma	Nystagmus	Nephrolithiasis	Hematuria	Macular_coloboma	Umbilical_hernia	Abnormality_of_retinal_pigmentation	Abnormality_of_calcium-phosphate_metabolism
Hypertrichosis_lanuginosa_congenita	Abnormality_of_the_dentition	Gingival_overgrowth	Hearing_impairment	Thick_eyebrow	Delayed_eruption_of_teeth	Abnormality_of_skin_pigmentation	Generalized_hirsutism
Maternal_hyperthermia-induced_birth_defects	Cleft_palate	Microcephaly	Seizures	Muscular_hypotonia	Hypertonia	Joint_stiffness	Intrauterine_growth_retardation	Abnormality_of_neuronal_migration	EEG_abnormality	Clinodactyly_of_the_5th_finger	Short_stature	Bilateral_single_transverse_palmar_creases	Aplasia/Hypoplasia_affecting_the_eye	Hypoplasia_of_penis	Midface_retrusion	Cognitive_impairment
Focal_palmoplantar_and_gingival_keratoderma	Gingival_overgrowth	Gingival_hyperkeratosis	Hyperhidrosis	Palmoplantar_keratoderma	Abnormal_fingernail_morphology	Abnormality_of_the_nail	Focal_friction-related_palmoplantar_hyperkeratosis	Subungual_hyperkeratosis	Circumungual_hyperkeratosis
Histidinuria-renal_tubular_defect_syndrome	Long_philtrum	Macrotia	Sensorineural_hearing_impairment	Wide_nasal_bridge	Intellectual_disability	Hypoplastic_toenails	Hypoglycemia	Ventriculomegaly	Cerebral_cortical_atrophy	Delayed_skeletal_maturation	Histidinuria	Short_middle_phalanx_of_finger	Rounded_middle_phalanx_of_finger	Impaired_histidine_renal_tubular_absorption
Holzgreve_syndrome	Cleft_palate	Turricephaly	Low-set_posteriorly_rotated_ears	Macrotia	Webbed_neck	Abnormality_of_the_ribs	Hand_polydactyly	Abnormality_of_the_metacarpal_bones	Single_umbilical_artery	Joint_stiffness	Intrauterine_growth_retardation	Oligohydramnios	Malformation_of_the_heart_and_great_vessels	Abnormality_of_the_ulna	Aplasia/Hypoplasia_of_the_lungs	Aplasia/Hypoplasia_of_the_corpus_callosum	Renal_hypoplasia/aplasia	Aplasia/Hypoplasia_of_the_tongue	Bifid_tongue	Abnormality_of_mesentery_morphology	Abnormally_ossified_vertebrae
Holoprosencephaly-postaxial_polydactyly_syndrome	Cryptorchidism	Hypospadias	Ambiguous_genitalia	Narrow_mouth	Cleft_palate	Oral_cleft	Hydrocephalus	Microcephaly	Micrognathia	Low-set_posteriorly_rotated_ears	Microphthalmia	Hypotelorism	Adrenal_hypoplasia	Abnormality_of_the_hypothalamus-pituitary_axis	Postaxial_hand_polydactyly	Muscular_hypotonia	Cerebellar_hypoplasia	Holoprosencephaly	Umbilical_hernia	Omphalocele	Polyhydramnios	Abnormal_cardiac_septum_morphology	Talipes	Anal_atresia	Encephalocele	Abnormal_lung_lobation	Malformation_of_the_heart_and_great_vessels	Intestinal_malrotation	Thyroid_hypoplasia	Aplasia/Hypoplasia_of_the_corpus_callosum	Renal_hypoplasia/aplasia	Hypoplasia_of_penis	Cyclopia	Hypoplasia_of_the_premaxilla	Abnormal_localization_of_kidney	Absent_nares
Holoprosencephaly-caudal_dysgenesis_syndrome	Abnormality_of_the_genital_system	Renal_insufficiency	Median_cleft_lip	Cleft_palate	Microcephaly	Hypertelorism	Low-set_ears	Proptosis	Abnormality_of_the_skeletal_system	Holoprosencephaly	Premature_birth	Abnormality_of_the_radius	Radial_club_hand	Cyclopia	Abnormality_of_the_diencephalon	Abnormality_of_the_cerebral_vasculature
Holoprosencephaly-craniosynostosis_syndrome	Brachycephaly	Microcephaly	Epicanthus	Facial_asymmetry	Strabismus	Upslanted_palpebral_fissure	Hypotelorism	Brachydactyly	Muscular_hypotonia	Plagiocephaly	Holoprosencephaly	Craniosynostosis	Coxa_valga	Delayed_skeletal_maturation	Clinodactyly_of_the_5th_finger	Short_stature	Abnormality_of_retinal_pigmentation	Hypoplastic_vertebral_bodies	Short_distal_phalanx_of_finger	Short_palpebral_fissure	Cognitive_impairment
Orofaciodigital_syndrome_type_1	Median_cleft_lip	Lobulated_tongue	Broad_alveolar_ridges	Accessory_oral_frenulum	High_palate	Abnormality_of_the_face	Hypertelorism	Wide_nasal_bridge	Frontal_bossing	Abnormality_of_the_dentition	Cleft_palate	Tongue_nodules	Facial_asymmetry	Underdeveloped_nasal_alae	Downslanted_palpebral_fissures	Hypodontia	Abnormal_skull_morphology	Hand_polydactyly	Intellectual_disability	Seizures	Ataxia	Foot_polydactyly	Short_toe	Deviation_of_finger	Clinodactyly_of_the_5th_finger	Reduced_bone_mineral_density	Finger_syndactyly	Cone-shaped_epiphysis	Hamartoma_of_tongue	Multicystic_kidney_dysplasia	Renal_insufficiency	Proteinuria	Hydronephrosis	Epicanthus	Micrognathia	Hearing_impairment	Chronic_otitis_media	Choanal_atresia	Telecanthus	Abnormality_of_dental_eNAME	Hypertension	Abnormality_of_the_skeletal_system	Dry_skin	Milia	Brachydactyly	Postaxial_hand_polydactyly	Preaxial_hand_polydactyly	Agenesis_of_corpus_callosum	Dandy-Walker_malformation
OSLAM_syndrome	Carious_teeth	Abnormality_of_neutrophils	Osteosarcoma	Radioulnar_synostosis	Clinodactyly_of_the_5th_finger	Short_stature	Increased_mean_corpuscular_volume
Progressive_osseous_heteroplasia	Abnormality_of_the_parathyroid_gland	Hypermelanotic_macule	Brachydactyly	Limitation_of_joint_mobility	Subcutaneous_nodule	Bone_pain	Osteoarthritis	Ectopic_calcification	Ectopic_ossification_in_muscle_tissue	Macule	Sarcoma	Papule
Blount_disease	Tibial_bowing	Abnormality_of_the_knee	Abnormality_of_the_tibial_metaphysis	Abnormality_of_the_proximal_tibial_epiphysis	Osteochondrosis
Olivopontocerebellar_atrophy-deafness_syndrome	Hearing_impairment	Strabismus	Chorioretinal_coloboma	Nystagmus	Optic_atrophy	Seizures	Ataxia	Hypertonia	Hyperreflexia	Ventriculomegaly	Cerebral_cortical_atrophy	Neurological_speech_impairment	EEG_abnormality	Olivopontocerebellar_atrophy
Ondine_syndrome	Seizures	Muscular_hypotonia	Respiratory_insufficiency	Aganglionic_megacolon	Abnormality_of_the_autonomic_nervous_system	Ganglioneuroma	Neuroblastoma	Ganglioneuroblastoma	Neoplasm_of_the_central_nervous_system	Cognitive_impairment
Ophthalmomandibulomelic_dysplasia	Megalocornea	Glaucoma	Blindness	Limitation_of_joint_mobility	Radioulnar_synostosis	Micromelia	Mesomelia	Elbow_dislocation	Abnormality_of_bone_mineral_density	Synostosis_of_carpal_bones	Obtuse_angle_of_mandible	Ulnar_deviated_club_hands	Radioulnar_dislocation	Lateral_humeral_condyle_aplasia	Aplasia/Hypoplasia_of_the_radius	Corneal_opacity	Symphalangism_affecting_the_phalanges_of_the_hand	Temporomandibular_joint_ankylosis	Camptodactyly_of_finger
Oculocerebral_hypopigmentation_syndrome_Preus_type	Abnormal_renal_tubule_morphology	High_palate	Hydrocephalus	Hearing_impairment	Cataract	Photophobia	Nystagmus	Ocular_albinism	Arachnodactyly	Intellectual_disability	Seizures	Ataxia	Global_developmental_delay	Hypertonia	Abnormality_of_neutrophils	Hypochromic_anemia	Abnormality_of_brainstem_morphology	Abnormality_of_the_hip_bone	Short_stature	Reduced_bone_mineral_density	Aplasia/Hypoplasia_of_the_cerebellum	Generalized_hypopigmentation	Iris_hypopigmentation	Abnormality_of_the_diencephalon	Abnormality_of_immune_system_physiology	White_hair
Odonto-onycho_dysplasia-alopecia_syndrome	Sparse_eyebrow	Microdontia	Misalignment_of_teeth	Palmoplantar_keratoderma	Hypotrichosis	Abnormal_fingernail_morphology	Alopecia	Hypoplastic_toenails	Sparse_body_hair	Abnormality_of_dental_morphology	Reduced_number_of_teeth
Odontomatosis-aortae_esophagus_stenosis_syndrome	Hepatic_failure	Dysphagia	Malformation_of_the_heart_and_great_vessels	Atherosclerosis	Odontoma	Myocarditis
Eye_defects-arachnodactyly-cardiopathy_syndrome	Cleft_palate	Prominent_occiput	Hypertelorism	Low-set_posteriorly_rotated_ears	Cataract	Arachnodactyly	Limitation_of_joint_mobility	Intrauterine_growth_retardation	Sandal_gap	Malformation_of_the_heart_and_great_vessels	Abnormality_of_pelvic_girdle_bone_morphology	Radioulnar_synostosis	Abnormality_of_the_hip_bone	Clinodactyly_of_the_5th_finger	Short_stature	Craniofacial_hyperostosis	Bowing_of_the_long_bones	Aplasia/Hypoplasia_of_the_lungs	Abnormal_distal_phalanx_morphology_of_finger	Flat_face	Non-midline_cleft_lip
Severe_oculo-renal-cerebellar_syndrome	Renal_insufficiency	Proteinuria	Wide_mouth	Narrow_face	Mask-like_facies	Mandibular_prognathia	Macrotia	Strabismus	Visual_impairment	Cataract	Optic_atrophy	Hypopigmented_skin_patches	Muscular_hypotonia	Spasticity	Spastic_diplegia	Choreoathetosis	Hyperreflexia	Sandal_gap	Intellectual_disability_profound	Scoliosis	Short_stature	Joint_hyperflexibility	Aplasia/Hypoplasia_of_the_cerebellum	Abnormality_of_retinal_pigmentation	Abnormal_retinal_vascular_morphology	Large_earlobe	Malar_prominence	Hypoplasia_of_the_zygomatic_bone	Glomerulopathy
Oculotrichoanal_syndrome	Hypertelorism	Bifid_nasal_tip	Anophthalmia	Microphthalmia	Nasolacrimal_duct_obstruction	Upper_eyelid_coloboma	Cryptophthalmos	Anteriorly_placed_anus	Anal_stenosis	Abnormal_hair_pattern
Oculocerebral_hypopigmentation_syndrome_Cross_type	Inguinal_hernia	Cryptorchidism	Ureteral_stenosis	Abnormality_of_the_urinary_system	Narrow_mouth	Abnormal_palate_morphology	Microcephaly	Dolichocephaly	Sensorineural_hearing_impairment	Anteverted_nares	Abnormality_of_the_eye	Abnormality_of_vision	Cataract	Myopia	Nystagmus	Ectropion	Microdontia	Thin_skin	Ocular_albinism	Choroideremia	Arachnodactyly	Abnormal_thumb_morphology	Intellectual_disability	Ataxia	Spasticity	Dandy-Walker_malformation	Hyperreflexia	Limitation_of_joint_mobility	Growth_delay	Abnormality_of_the_voice	Anemia	Abnormality_of_extrapyramidal_motor_function	Athetosis	EEG_abnormality	Spastic_tetraplegia	Short_nose	Short_stature	Depressed_nasal_bridge	Abnormality_of_bone_marrow_cell_morphology	Hypopigmentation_of_hair	Abnormal_pyramidal_sign	Iris_hypopigmentation	Corneal_opacity	Aplasia/Hypoplasia_affecting_the_eye	Abnormality_of_movement
Annular_pancreas	Annular_pancreas	High_intestinal_obstruction	Duodenal_stenosis
Pachygyria-intellectual_disability-epilepsy_syndrome	Seizures	Global_developmental_delay	Premature_birth	Intellectual_disability_severe
Papillon-Lef√®vre_syndrome	Abnormality_of_the_dentition	Severe_periodontitis	Gingivitis	Periodontitis	Palmoplantar_hyperkeratosis	Palmoplantar_keratoderma	Hypertrichosis	Hypopigmented_skin_patches	Cigarette-paper_scars	Arachnodactyly	Abnormal_fingernail_morphology	Recurrent_skin_infections	Abnormality_of_the_nail	Recurrent_respiratory_infections	Generalized_hirsutism	Sparse_body_hair	Cerebral_calcification	Osteolysis	Squamous_cell_carcinoma	Melanoma	Atrophy_of_alveolar_ridges	Premature_loss_of_primary_teeth	Neoplasm_of_the_skin	Nail_dystrophy	Reduced_number_of_teeth	Chronic_furunculosis	Liver_abscess	Recurrent_cutaneous_abscess_formation	Pustule
Papilloma_of_choroid_plexus	Hydrocephalus	Visual_impairment	Seizures	Hypertonia	Neoplasm	Hemiplegia/hemiparesis	Abnormality_of_nervous_system_morphology	Cognitive_impairment	Choroid_plexus_papilloma
Otofaciocervical_syndrome	High_palate	Full_cheeks	Facial_asymmetry	Macrotia	Conductive_hearing_impairment	Protruding_ear	Atresia_of_the_external_auditory_canal	Anteverted_nares	Abnormality_of_the_clavicle	Intellectual_disability	Global_developmental_delay	Hypertonia	Hyperreflexia	Neurological_speech_impairment	Delayed_skeletal_maturation	Scapular_winging	Short_stature	Preauricular_pit	Depressed_nasal_bridge	Abnormal_dermatoglyphics	Renal_hypoplasia/aplasia	Abnormality_of_the_antihelix	Down-sloping_shoulders
Endosteal_hyperostosis_Worth_type	Mandibular_prognathia	Sensorineural_hearing_impairment	Nystagmus	Abnormality_of_the_ribs	Abnormal_cortical_bone_morphology	Abnormal_form_of_the_vertebral_bodies	Craniofacial_hyperostosis	Diaphyseal_thickening	Generalized_osteosclerosis	Facial_palsy	Torus_palatinus	Vertebral_body_sclerosis	Clavicular_sclerosis
Pachydermoperiostosis	Coarse_facial_features	Ptosis	Gynecomastia	Growth_hormone_excess	Osteoporosis	Edema	Hyperhidrosis	Eczematoid_dermatitis	Palmoplantar_keratoderma	Seborrheic_dermatitis	Acne	Thickened_skin	Abnormal_fingernail_morphology	Arthritis	Limitation_of_joint_mobility	Joint_swelling	Splenomegaly	Anemia	Malabsorption	Gastrointestinal_hemorrhage	Hepatomegaly	Scoliosis	Bone_pain	Osteomyelitis	Osteolysis	Arthralgia	Genu_varum	Abnormal_cortical_bone_morphology	Peptic_ulcer	Abnormality_of_bone_marrow_cell_morphology	Abnormality_of_epiphysis_morphology	Neoplasm_of_the_skin	Cutis_gyrata_of_scalp	Abnormal_hair_pattern	Impaired_temperature_sensation	Avascular_necrosis	Abnormal_hair_quantity	Cerebral_palsy	Neoplasm_of_the_lung	Clubbing_of_toes	Small_hand
Otoonychoperoneal_syndrome	Dolichocephaly	Macrotia	Upslanted_palpebral_fissure	Abnormal_diaphysis_morphology	Intellectual_disability_mild	Flexion_contracture	Abnormality_of_the_nail	Knee_flexion_contracture	Underfolded_helix	Abnormality_of_the_antihelix	Popliteal_pterygium	Aplasia/Hypoplasia_of_the_earlobes	Abnormality_of_the_helix
Autosomal_recessive_malignant_osteopetrosis	Hydrocephalus	Macrocephaly	Hearing_impairment	Otitis_media	Visual_impairment	Nystagmus	Abnormality_of_visual_evoked_potentials	Delayed_eruption_of_teeth	Abnormality_of_the_ribs	Narrow_chest	Abnormality_of_the_metaphysis	Bruising_susceptibility	Pallor	Tremor	Craniosynostosis	Growth_delay	Abnormal_pulmonary_valve_morphology	Splenomegaly	Anemia	Abnormality_of_metabolism/homeostasis	Pulmonary_arterial_hypertension	Apnea	Hypophosphatemia	Recurrent_respiratory_infections	Hepatomegaly	Chronic_rhinitis	Bone_pain	Lymphadenopathy	Recurrent_fractures	Hypocalcemia	Reduced_bone_mineral_density	Abnormality_of_temperature_regulation	Pulmonary_artery_stenosis	Abnormality_of_epiphysis_morphology	Premature_loss_of_primary_teeth	Bowing_of_the_long_bones	Cranial_nerve_paralysis	Optic_nerve_compression	Abnormal_blistering_of_the_skin	Opsoclonus	Abnormality_of_hair_texture	Osteopetrosis	Abnormality_of_movement
Osteopathia_striata-pigmentary_dermopathy-white_forelock_syndrome	Abnormal_diaphysis_morphology	Abnormality_of_the_metaphysis	White_forelock	Abnormality_of_pelvic_girdle_bone_morphology	Macular_hyperpigmented_dermopathy	Osteopathia_striata	Rough_bone_trabeculation
Osteoporosis-macrocephaly-blindness-joint_hyperlaxity_syndrome	Microcephaly	Blindness	Optic_atrophy	Osteoporosis	Brachydactyly	Intellectual_disability	Frontal_bossing	Wormian_bones	Joint_hyperflexibility	Short_distal_phalanx_of_finger
Buschke-Ollendorff_syndrome	Osteopoikilosis	Connective_tissue_nevi	Abnormality_of_the_metaphysis	Subcutaneous_nodule	Skeletal_dysplasia	Bone_pain	Abnormal_bone_structure	Short_stature	Flat_occiput	Generalized_osteosclerosis	Abnormality_of_epiphysis_morphology	Generalized_hypopigmentation	Hyperostosis	Papule	Flexion_contracture	Joint_stiffness	Scleroderma	Renal_insufficiency	Abnormality_of_the_dentition	Hearing_impairment	Strabismus	Visual_impairment	Hypertension	Palmoplantar_keratoderma	Atypical_scarring_of_skin	Lymphedema	Hemangioma	Arthritis	Hoarse_voice	Abnormal_aortic_morphology	Recurrent_fractures	Arthralgia	Myalgia	Diffuse_skin_atrophy	Generalized_limb_muscle_atrophy	Abnormal_axial_skeleton_morphology
Multicentric_carpo-tarsal_osteolysis_with_or_without_nephropathy	Proteinuria	Nephropathy	Triangular_face	Micrognathia	Wide_nasal_bridge	Telecanthus	Proptosis	Wrist_swelling	Gait_disturbance	Limitation_of_joint_mobility	Carpal_osteolysis	Metacarpal_osteolysis	Polyhydramnios	Downturned_corners_of_mouth	Osteolysis	Abnormality_of_the_wrist	Slender_long_bone	EMG_abnormality	Cachexia	Abnormality_of_epiphysis_morphology	Camptodactyly_of_finger
Nasu-Hakola_disease	Hydrocephalus	Oculomotor_apraxia	Behavioral_abnormality	Frontal_lobe_dementia	Disinhibition	Irritability	Personality_changes	Seizures	Spasticity	Limitation_of_joint_mobility	Chorea	Ventriculomegaly	Cerebral_cortical_atrophy	Neurological_speech_impairment	Memory_impairment	Developmental_regression	Acute_leukemia	Cerebral_calcification	Skeletal_dysplasia	Bone_pain	Arthralgia	Reduced_bone_mineral_density	Abnormality_of_epiphysis_morphology	Abnormal_adipose_tissue_morphology	Agnosia	Bone_cyst	Functional_abnormality_of_the_gastrointestinal_tract	Abnormality_of_movement
Osteomesopyknosis	Abnormality_of_metabolism/homeostasis	Scoliosis	Kyphosis	Abnormal_cortical_bone_morphology	Abnormal_form_of_the_vertebral_bodies	Increased_bone_mineral_density	Vertebral_body_sclerosis
Autosomal_recessive_distal_osteolysis_syndrome	Abnormality_of_the_dentition	Hypoplasia_of_the_maxilla	Broad_nasal_tip	Proptosis	Intellectual_disability_mild	Osteolysis	Short_stature	Short_distal_phalanx_of_finger	Midface_retrusion
Short_stature-valvular_heart_disease-characteristic_facies_syndrome	Abnormality_of_the_dentition	High_palate	Ptosis	Dental_crowding	Muscular_hypotonia	Mitral_valve_prolapse	Pulmonic_stenosis	Abnormal_heart_valve_morphology	Delayed_skeletal_maturation	Disproportionate_short_stature	Clinodactyly_of_the_5th_finger	Joint_hyperflexibility	Large_face	Small_hand
Phakomatosis_pigmentovascularis	Facial_asymmetry	Glaucoma	Blue_sclerae	Nevus_flammeus	Hypopigmented_skin_patches	Seizures	Cerebral_cortical_atrophy	EEG_abnormality	Cerebral_calcification	Paresthesia	Reduced_bone_mineral_density	Generalized_hyperpigmentation	Arteriovenous_malformation	Cognitive_impairment
Short_stature-wormian_bones-dextrocardia_syndrome	Cryptorchidism	Broad_alveolar_ridges	High_palate	Abnormality_of_the_philtrum	Micrognathia	Low-set_ears	Wide_nasal_bridge	Depressed_nasal_tip	Downslanted_palpebral_fissures	Long_eyelashes	Delayed_eruption_of_teeth	Anterior_hypopituitarism	Brachydactyly	Spasticity	Patent_ductus_arteriosus	Dextrocardia	Anal_atresia	Wormian_bones	Short_stature	Abnormal_dermatoglyphics	Renal_hypoplasia/aplasia	Reduced_number_of_teeth	Midshaft_hypospadias	Camptodactyly_of_finger	Cognitive_impairment
Short_stature-deafness-neutrophil_dysfunction-dysmorphism_syndrome	Sensorineural_hearing_impairment	Glaucoma	Craniosynostosis	Mutism	Neoplasm	Short_stature	Ectopic_anus	Abnormality_of_immune_system_physiology
Alopecia-intellectual_disability_syndrome	Microcephaly	Hearing_impairment	Macrotia	Photophobia	Hypergonadotropic_hypogonadism	Brachydactyly	Split_hand	Intellectual_disability	Seizures	Muscular_hypotonia	Flexion_contracture	Growth_delay	Alopecia	Sparse_scalp_hair	Sparse_body_hair	EEG_abnormality	Scoliosis	Delayed_skeletal_maturation	Short_stature	Abnormal_nasal_morphology	Ichthyosis	Abnormality_of_skeletal_morphology	Aplasia/Hypoplasia_of_the_eyebrow	Short_corpus_callosum
Pelvic_dysplasia-arthrogryposis_of_lower_limbs_syndrome	Blue_sclerae	Gait_disturbance	Limitation_of_joint_mobility	Hip_dislocation	Slender_long_bone	Skeletal_muscle_atrophy	Spina_bifida_occulta	Depressed_nasal_bridge	Hypoplastic_pelvis	Sacrococcygeal_pilonidal_abnormality
[truncated: 3,379 more rows]
[truncated: 138 more columns]
