# Supplementary material for: The visualization of Orphadata neurology phenotypes
Source: Front Digit Health. 2023 Jan 27;5:1064936. doi: 10.3389/fdgth.2023.1064936 (PMC9911440; doi:10.3389/fdgth.2023.1064936)
Supplement: Supplementary file 5 [file Table5.xlsx]

## Sheet: Map_class_to_superclass
Class	Superclass
Abdominal_colic	pain
Abdominal_cramps	pain
Abdominal_distention	unclassified
Abdominal_guarding	pain
Abdominal_obesity	unclassified
Abdominal_pain	pain
Abdominal_rigidity	pain
Abdominal_symptom	unclassified
Abdominal_wall_muscle_weakness	weakness
Abducens_palsy	eye_movements
Abnormal_acetabulum_morphology	unclassified
Abnormal_aggressive_impulsive_or_violent_behavior	behavior
Abnormal_Amsler_grid_test	vision
Abnormal_anterior_chamber_morphology	vision
Abnormal_anterior_eye_segment_morphology	vision
Abnormal_aortic_valve_physiology	unclassified
Abnormal_atrioventricular_conduction	unclassified
Abnormal_atrioventricular_valve_physiology	unclassified
Abnormal_automated_kinetic_perimetry_test	vision
Abnormal_axial_muscle_morphology	unclassified
Abnormal_best_corrected_visual_acuity_test	vision
Abnormal_bowel_sounds	unclassified
Abnormal_cardiac_atrial_physiology	unclassified
Abnormal_cardiac_index	unclassified
Abnormal_cardiac_output	unclassified
Abnormal_cardiac_ventricular_function	unclassified
Abnormal_cardiovascular_system_physiology	unclassified
Abnormal_confrontational_visual_field_test	vision
Abnormal_conjugate_eye_movement	eye_movements
Abnormal_consumption_behavior	behavior
Abnormal_contrast_sensitivity	vision
Abnormal_cornea_morphology	vision
Abnormal_corneal_endothelium_morphology	vision
Abnormal_corneal_epithelium_morphology	vision
Abnormal_cranial_nerve_physiology	cranial_nerve
Abnormal_cry	speech
Abnormal_dolls_eye_reflex	cranial_nerve
Abnormal_drinking_behavior	behavior
Abnormal_ear_physiology	cranial_nerve
Abnormal_eating_behavior	behavior
Abnormal_ejaculation	unclassified
Abnormal_electrophysiology_of_sinoatrial_node_origin	unclassified
Abnormal_emotion/affect_behavior	behavior
Abnormal_Estermann_grid_perimetry_test	vision
Abnormal_extraocular_muscle_physiology	eye_movements
Abnormal_eye_physiology	vision
Abnormal_facial_expression	cranial_nerve
Abnormal_facial_shape	head
Abnormal_fear/anxiety-related_behavior	behavior
Abnormal_fifth_cranial_nerve_physiology	cranial_nerve
Abnormal_fontanelle	head
Abnormal_fundus_fluorescein_angiography	vision
Abnormal_fundus_morphology	vision
Abnormal_gastrointestinal_motility	dysautonomia
Abnormal_greater_sciatic_notch_morphology	unclassified
Abnormal_hair_pattern	skin
Abnormal_hair_quantity	skin
Abnormal_hair_whorl	skin
Abnormal_Hardy-Rand-Rittler_plate_test	vision
Abnormal_heart_rate_variability	unclassified
Abnormal_heart_sound	unclassified
Abnormal_heart_valve_physiology	unclassified
Abnormal_hemidiaphragm_morphology	unclassified
Abnormal_hip_bone_morphology	unclassified
Abnormal_horizontal_rectus_muscle_physiology	eye_movements
Abnormal_Humphrey_SITA_10-2_perimetry_test	vision
Abnormal_Humphrey_SITA_24-2_perimetry_test	vision
Abnormal_Humphrey_SITA_30-2_perimetry_test	vision
Abnormal_iliac_wing_morphology	unclassified
Abnormal_ilium_morphology	unclassified
Abnormal_indocyanine_green_angiography	vision
Abnormal_inferior_oblique_muscle_physiology	eye_movements
Abnormal_inferior_rectus_muscle_physiology	eye_movements
Abnormal_involuntary_eye_movements	eye_movements
Abnormal_involuntary_movement	hyperkinesia
Abnormal_Ishihara_plate_test	vision
Abnormal_kinetic_perimetry_test	vision
Abnormal_lateral_rectus_muscle_physiology	eye_movements
Abnormal_left_hemidiaphragm_morphology	unclassified
Abnormal_left_ventricular_end-diastolic_volume	unclassified
Abnormal_left_ventricular_function	unclassified
Abnormal_manual_kinetic_perimetry_test	vision
Abnormal_medial_rectus_muscle_physiology	eye_movements
Abnormal_migration_of_corneal_endothelium	vision
Abnormal_mitral_valve_physiology	unclassified
Abnormal_morphology_of_the_chest_musculature	miscellaneous_muscle
Abnormal_morphology_of_the_musculature_of_the_neck	miscellaneous_muscle
Abnormal_morphology_of_the_pelvis_musculature	miscellaneous_muscle
Abnormal_morphology_of_the_shoulder_musculature	miscellaneous_muscle
Abnormal_nail_growth	skin
Abnormal_number_of_hair_whorls	skin
Abnormal_oblique_muscle_physiology	eye_movements
Abnormal_occipital_bone_morphology	head
Abnormal_OCT-measured_macular_thickness	vision
Abnormal_ocular_alignment	eye_movements
Abnormal_optical_coherence_tomography	vision
Abnormal_parietal_bone_morphology	head
Abnormal_Pelli_Robson_contrast_sensitivity_chart_test	vision
Abnormal_pelvis_bone_morphology	unclassified
Abnormal_peripheral_nervous_system_synaptic_transmission	miscellaneous_muscle
Abnormal_peristalsis	dysautonomia
Abnormal_pinhole_visual_acuity_test	vision
Abnormal_position_of_hair_whorl	skin
Abnormal_posterior_cranial_fossa_morphology	head
Abnormal_posterior_eye_segment_morphology	vision
Abnormal_posterior_segment_imaging	vision
Abnormal_postural_reflex	gait
Abnormal_pulmonary_valve_physiology	unclassified
Abnormal_pupil_morphology	vision
Abnormal_pupil_shape	vision
Abnormal_pupillary_function	vision
Abnormal_pupillary_light_reflex	vision
Abnormal_pyramidal_sign	hyperreflexia
Abnormal_rapid_eye_movement_sleep	sleep
Abnormal_rectus_muscle_physiology	eye_movements
Abnormal_reflex	hyperreflexia
Abnormal_regional_left_ventricular_contraction	unclassified
Abnormal_retinal_morphology_on_macular_OCT	vision
Abnormal_right_hemidiaphragm_morphology	unclassified
Abnormal_right_ventricular_function	unclassified
Abnormal_saccadic_eye_movements	eye_movements
Abnormal_scalp_morphology	head
Abnormal_sebaceous_gland_morphology	skin
Abnormal_second_heart_sound	unclassified
Abnormal_sella_turcica_morphology	head
Abnormal_shape_of_the_frontal_region	head
Abnormal_shape_of_the_occiput	head
Abnormal_skinfold_thickness_measurement	unclassified
Abnormal_speech_discrimination	cranial_nerve
Abnormal_speech_prosody	speech
Abnormal_static_automated_perimetry_test	vision
Abnormal_static_perimetry_test	vision
Abnormal_stereopsis	eye_movements
Abnormal_superficial_reflex	cutaneous_reflex
Abnormal_superior_oblique_muscle_physiology	eye_movements
Abnormal_superior_rectus_muscle_physiology	eye_movements
Abnormal_sweat_gland_morphology	skin
Abnormal_systemic_blood_pressure	unclassified
Abnormal_temper_tantrums	behavior
Abnormal_toenail_morphology	skin
Abnormal_triceps_skinfold_thickness	unclassified
Abnormal_tricuspid_valve_physiology	unclassified
Abnormal_unaided_visual_acuity_test	vision
Abnormal_upper_to_lower_segment_ratio	unclassified
Abnormal_uvea_morphology	vision
Abnormal_ventricular_filling	unclassified
Abnormal_vertical_rectus_muscle_physiology	eye_movements
Abnormal_vestibulo-ocular_reflex	cranial_nerve
Abnormal_Vistech_contrast_sensitivity_test	vision
Abnormal_visual_accommodation	vision
Abnormal_visual_field_test	vision
Abnormal_visual_fixation	eye_movements
Abnormal_waist_to_hip_ratio	unclassified
Abnormality_iris_morphology	vision
Abnormality_of_binocular_vision	eye_movements
Abnormality_of_blood_circulation	unclassified
Abnormality_of_blood_volume_homeostasis	unclassified
Abnormality_of_body_height	unclassified
Abnormality_of_body_mass_index	unclassified
Abnormality_of_body_weight	unclassified
Abnormality_of_buccal_fat_pad	head
Abnormality_of_buccal_mucosa	head
Abnormality_of_buccinator_muscle	head
Abnormality_of_calvarial_morphology	head
Abnormality_of_cardiovascular_system_electrophysiology	unclassified
Abnormality_of_corneal_shape	vision
Abnormality_of_corneal_size	vision
Abnormality_of_cranial_sutures	head
Abnormality_of_epiphysis_morphology	unclassified
Abnormality_of_external_jugular_vein	neck
Abnormality_of_extrinsic_muscle_of_tongue	miscellaneous_muscle
Abnormality_of_eye_movement	eye_movements
Abnormality_of_facial_musculature	miscellaneous_muscle
Abnormality_of_fontanelles	head
Abnormality_of_fundus_pigmentation	vision
Abnormality_of_genioglossus_muscle	miscellaneous_muscle
Abnormality_of_geniohyoid_muscle	neck
Abnormality_of_globe_location	vision
Abnormality_of_globe_size	vision
Abnormality_of_hair_texture	skin
Abnormality_of_inferior_oblique_extraocular_muscle	unclassified
Abnormality_of_internal_jugular_vein	neck
Abnormality_of_intrinsic_muscle_of_tongue	unclassified
Abnormality_of_jaw_muscles	head
Abnormality_of_lateral_rectus_extra-ocular_muscle	unclassified
Abnormality_of_lens_shape	vision
Abnormality_of_limbs	miscellaneous_muscle
Abnormality_of_long_bone_morphology	unclassified
Abnormality_of_masticatory_muscle	head
Abnormality_of_muscle_of_facial_expression	head
Abnormality_of_muscle_size	miscellaneous_muscle
Abnormality_of_nail_color	skin
Abnormality_of_nasal_musculature	head
Abnormality_of_ocular_abduction	eye_movements
Abnormality_of_ocular_smooth_pursuit	eye_movements
Abnormality_of_optic_chiasm_morphology	vision
Abnormality_of_pain_sensation	sensory
Abnormality_of_pelvic_girdle_bone_morphology	unclassified
Abnormality_of_periauricular_region	head
Abnormality_of_refraction	vision
Abnormality_of_secondary_sexual_hair	skin
Abnormality_of_skin_adnexa_morphology	skin
Abnormality_of_skin_adnexa_physiology	skin
Abnormality_of_skull_ossification	head
Abnormality_of_skull_size	head
Abnormality_of_styloglossus_muscle	miscellaneous_muscle
Abnormality_of_the_ankles	unclassified
Abnormality_of_the_anterior_fontanelle	head
Abnormality_of_the_axillary_hair	skin
Abnormality_of_the_back_musculature	miscellaneous_muscle
Abnormality_of_the_bladder	unclassified
Abnormality_of_the_calf_musculature	miscellaneous_muscle
Abnormality_of_the_calvaria	head
Abnormality_of_the_cheek	head
Abnormality_of_the_chin	head
Abnormality_of_the_clivus	head
Abnormality_of_the_corneal_limbus	vision
Abnormality_of_the_curvature_of_the_cornea	vision
Abnormality_of_the_diaphragm	unclassified
Abnormality_of_the_eye	vision
Abnormality_of_the_face	head
Abnormality_of_the_fontanelles_or_cranial_sutures	head
Abnormality_of_the_foot_musculature	miscellaneous_muscle
Abnormality_of_the_forehead	head
Abnormality_of_the_frontal_hairline	head
Abnormality_of_the_glabella	head
Abnormality_of_the_gluteal_musculature	miscellaneous_muscle
Abnormality_of_the_hairline	skin
Abnormality_of_the_head	head
Abnormality_of_the_hip-girdle_musculature	miscellaneous_muscle
Abnormality_of_the_hypothenar_eminence	miscellaneous_muscle
Abnormality_of_the_integument	skin
Abnormality_of_the_lens	vision
Abnormality_of_the_mastoid	head
Abnormality_of_the_menstrual_cycle	unclassified
Abnormality_of_the_metopic_suture	head
Abnormality_of_the_musculature	miscellaneous_muscle
Abnormality_of_the_musculature_of_the_limbs	miscellaneous_muscle
Abnormality_of_the_musculature_of_the_thigh	miscellaneous_muscle
Abnormality_of_the_musculature_of_the_upper_arm	miscellaneous_muscle
Abnormality_of_the_nail	skin
Abnormality_of_the_optic_disc	vision
Abnormality_of_the_optic_nerve	vision
Abnormality_of_the_periorbital_region	head
Abnormality_of_the_posterior_hairline	head
Abnormality_of_the_pubic_hair	skin
Abnormality_of_the_skull_base	head
Abnormality_of_the_submandibular_region	head
Abnormality_of_the_subungual_region	skin
Abnormality_of_the_supraorbital_ridges	head
Abnormality_of_the_thenar_eminence	miscellaneous_muscle
Abnormality_of_the_upper_arm	miscellaneous_muscle
Abnormality_of_the_voice	speech
Abnormality_of_vision	vision
Abnormally_large_globe	vision
Abnormally_loud_pulmonic_component_of_the_second_heart_sound	unclassified
Abnormally_low-pitched_voice	speech
Abolished_vibratory_sensee	sensory
Absence_seizure_with_eyelid_myoclonia	seizure
Absent_abdominal_reflex	cutaneous_reflex
Absent_Achilles_reflex	hyporeflexia
Absent_atrioventricular_node	unclassified
Absent_axillary_hair	skin
Absent_cremaster_reflex	cutaneous_reflex
Absent_epiphyses	unclassified
Absent_extraocular_muscles	unclassified
Absent_facial_hair	skin
Absent_fifth_fingernail	skin
Absent_fifth_toenail	skin
Absent_fingernail	skin
Absent_hair	skin
Absent_lunula	skin
Absent_mastoid	head
Absent_nail_of_hallux	skin
Absent_ossification_of_calvaria	head
Absent_patellar_reflexes	hyporeflexia
Absent_pubertal_growth_spurt	unclassified
Absent_pubic_hair	skin
Absent_retinal_pigment_epithelium	vision
Absent_sebaceous_glands	skin
Absent_second_fingernail	skin
Absent_smooth_pursuit	eye_movements
Absent_thumbnail	skin
Absent_toenail	skin
Absent_vestibular_function	cranial_nerve
Absolute_eccentric_fixation	eye_movements
Abulia	behavior
Accessory_cranial_suture	head
Accommodative_esotropia	eye_movements
Acetabular_dysplasia	unclassified
Acetabular_erosions	unclassified
Acetabular_spurs	unclassified
Achromatic_retinal_patches	vision
Achromatopsia	vision
Acne	skin
Acquired_abnormal_hair_pattern	skin
Acral_overgrowth	unclassified
Acrania	head
Acrobrachycephaly	head
Acroparesthesia	sensory
Action_tremor	tremor
Aculeiform_cataract	vision
Acute_abdomen	pain
Acute_constipation	unclassified
Acute_coronary_syndrome	unclassified
Acute_infantile_spinal_muscular_atrophy	atrophy
Acute_insomnia	sleep
Addictive_behavior	behavior
Adenoma_sebaceum	skin
Adult_onset_sensorineural_hearing_impairment	cranial_nerve
Adult-onset_night_blindness	vision
Advanced_pneumatization_of_the_mastoid_process	head
Adversive_status_epilepticus	seizure
Affective_epileptic_aura	seizure
Against_the_rule_astigmatism	vision
Age-related_cataract	vision
Age-related_cortical_cataract	vision
Age-related_nuclear_cataract	vision
Age-related_posterior_subcapsular_cataract	vision
Agenesis_of_the_carotid_canal	head
Agenesis_of_the_diaphragm	unclassified
Ageusia	cranial_nerve
Aggressive_behavior	behavior
Agitation	behavior
Agoraphobia	behavior
Akathisia	hyperkinesia
Akinesia	hypokinesia
Akinetic_mutism	behavior
Akinetic_rigidity_syndrome	hypertonia
Alacrima	cranial_nerve
Alcoholism	behavior
Alexia	speech
Alexithymia	behavior
Alien_limb_phenomenon	hyperkinesia
Allodynia	pain
Alopecia	skin
Alopecia_of_scalp	skin
Alopecia_totalis	skin
Alopecia_universalis	skin
Altered_consciousness	alertness
Alternating_esotropia	eye_movements
Alternating_exotropia	eye_movements
Alternating_hyperphoria	eye_movements
Alternating_hypertropia	eye_movements
Alternating_hypophoria	eye_movements
Alternating_hypotropia	eye_movements
Altitudinal_visual_field_defect	vision
Amaurosis_fugax	vision
Amblyopia	vision
Amenorrhea	unclassified
Aminoglycoside-induced_hearing_loss	cranial_nerve
Amphetamine_addiction	behavior
Amyloid_deposition_in_the_vitreous_humor	vision
Amyoplasia	miscellaneous_muscle
Amyotrophy_of_ankle_musculature	atrophy
Amyotrophy_of_the_musculature_of_the_pelvis	atrophy
Anagen_effluvium	skin
Anal_pain	pain
Anarthria	speech
Anejaculation	unclassified
Angina_pectoris	unclassified
Angle_closure_glaucoma	vision
Anhedonia	behavior
Anhidrosis	dysautonomia
Anhidrosis	skin
Anisocoria	vision
Anisometropia	vision
Ankle_clonus	hyperreflexia
Ankle_joint_effusion	unclassified
Ankle_pain	pain
Ankle_swelling	unclassified
Ankle_weakness	weakness
Anomalous_trichromacy	vision
Anomic_aphasia	speech
Anonychia	skin
Anorexia	unclassified
Anorgasmia	unclassified
Antalgic_gait	gait
Anterior_cervical_hypertrichosis	skin
Anterior_cortical_cataract	vision
Anterior_lenticonus	vision
Anterior_plagiocephaly	head
Anterior_polar_cataract	vision
Anterior_pyramidal_cataract	vision
Anterior_subcapsular_cataract	vision
Anxiety	behavior
Aortic_regurgitation	unclassified
Aortic_valve_stenosis	unclassified
Apathy	behavior
Aphasia	speech
Aphasic_status_epilepticus	seizure
Aplasia_of_the_eccrine_sweat_glands	skin
Aplasia_of_the_musculature	miscellaneous_muscle
Aplasia_of_the_musculature_of_the_pelvis	miscellaneous_muscle
Aplasia_of_the_sweat_glands	skin
Aplasia/Hypoplasia_involving_the_musculature_of_the_extremities	miscellaneous_muscle
Aplasia/Hypoplasia_involving_the_musculature_of_the_upper_arm	miscellaneous_muscle
Aplasia/Hypoplasia_involving_the_pelvis	unclassified
Aplasia/Hypoplasia_involving_the_skeletal_musculature	miscellaneous_muscle
Aplasia/Hypoplasia_of_the_biceps	miscellaneous_muscle
Aplasia/Hypoplasia_of_the_diaphragm	unclassified
Aplasia/Hypoplasia_of_the_musculature_of_the_pelvis	miscellaneous_muscle
Aplasia/Hypoplasia_of_the_musculature_of_the_thigh	miscellaneous_muscle
Aplasia/Hypoplasia_of_the_nails	skin
Aplasia/Hypoplasia_of_the_pubic_bone	unclassified
Aplasia/Hypoplasia_of_the_quadriceps	unclassified
Aplasia/Hypoplasia_of_the_sweat_glands	skin
Aplasia/Hypoplasia_of_the_triceps	miscellaneous_muscle
Aplasia/Hypoplastia_of_the_eccrine_sweat_glands	skin
Aplastic_pubic_bones	unclassified
Aplastic/hypoplastic_toenail	skin
Appendicular_ataxia	incoordination
Appendicular_hypotonia	hypotonia
Apraxia	cognitive
Areflexia	hyporeflexia
Areflexia_of_lower_limbs	hyporeflexia
Arm_dystonia	hyperkinesia
Arms_not_swung_while_walking	hypokinesia
Arthralgia	pain
Arthralgia_of_the_hip	pain
Arthralgia/arthritis	unclassified
Arthritis	unclassified
Ash_leaf_spot	skin
Asterixis	hyperkinesia
Asteroid_hyalosis	vision
Asthenia	unclassified
Asthenopia	vision
Astigmatism	vision
Asymmetric_crying_face	head
Asymmetric_growth	unclassified
Asymmetric_short_stature	unclassified
Asymmetrical_gluteal_crease	miscellaneous_muscle
Asymmetry_of_iris_pigmentation	vision
Asynergia	incoordination
Ataxia	incoordination
Ataxic	incoordination
Athetosis	hyperkinesia
Atonic_seizure	seizure
Atretic_occipital_cephalocele	head
Atrichia	skin
Atrioventricular_block	unclassified
Atrioventricular_dissociation	unclassified
Atrophic_patchy_alopecia	skin
Atrophy	atrophy
Attention_deficit_hyperactivity_disorder	behavior
Atypical_absence_seizure	seizure
Atypical_absence_status_epilepticus	seizure
Auditory_hallucinations	behavior
Autism	behavior
Autism_with_high_cognitive_abilities	behavior
Autistic_behavior	behavior
Autonomic_bladder_dysfunction	sphincter
Autonomic_epileptic_aura	seizure
Autonomic_erectile_dysfunction	sphincter
Autonomic_status_epilepticus	seizure
Avoidance_of_stimuli_associated_with_traumatic_event	behavior
Axial_dystonia	hyperkinesia
Axial_muscle_atrophy	unclassified
Axial_muscle_weakness	weakness
Axial_myopia	vision
Axial_rigidity	hypertonia
Axillary_apocrine_gland_hypoplasia	skin
Babinski_sign	hyperreflexia
Ballismus	hyperkinesia
Band_keratopathy	vision
Barber_chair_sign	neck
Basic_constant_esotropia	eye_movements
Basic_constant_exotropia	eye_movements
Basilar_impression	head
Basilar_invagination	head
Beaded_vitreous_appearance	vision
Beaked_nails	skin
Beaus_lines	skin
Beevors_sign	weakness
Benign_essential_blepharospasm	hyperkinesia
Benzodiazepine_addiction	behavior
Biceps_aplasia	miscellaneous_muscle
Biceps_areflexia	hyporeflexia
Biceps_hyperreflexia	hyperreflexia
Biceps_hypoplasia	miscellaneous_muscle
Biceps_hyporeflexia	hyporeflexia
Bicoronal_synostosis	head
Bidirectional_shunt	unclassified
Bifid_nail	neck
Bilambdoid_synostosis	head
Bilateral_asymmetric_neonatal_sequential_seizure	seizure
Bilateral_carotid_bruit	neck
Bilateral_congenital_mydriasis	vision
Bilateral_facial_palsy	cranial_nerve
Bilateral_ptosis	cranial_nerve
Bilateral_rigidity	hypertonia
Bilateral_sensorineural_hearing_impairment	cranial_nerve
Bilateral_symmetric_neonatal_sequential_seizure	seizure
Bilateral_tonic-clonic_seizure	seizure
Bilateral_tonic-clonic_seizure_on_awakening	seizure
Bilateral_tonic-clonic_seizure_with_focal_onset	seizure
Bilateral_tonic-clonic_seizure_with_generalized_onset	seizure
Bilingual_aphasia	speech
Binasal_hemianopia	vision
Biparietal_narrowing	head
Bipolar_affective_disorder	behavior
Bird-like_facies	head
Birth_length_greater_than_97th_percentile	unclassified
Birth_length_less_than_3rd_percentile	unclassified
Bitemporal_forceps_marks	head
Bitemporal_hemianopia	vision
Bitemporal_hollowing	head
Bladder_outlet_obstruction	unclassified
Bladder_pain	pain
Blakes_pouch_cyst	head
Blepharospasm	hyperkinesia
Blind-spot_enlargment	vision
Blindness	vision
Blood_pressure_substantially_higher_in_arms_than_legs	unclassified
Blood_pressure_substantially_higher_in_legs_than_arms	unclassified
Bloody_diarrhea	unclassified
Bloody_mucoid_diarrhea	unclassified
Blue_cone_monochromacy	vision
Blue_irides	vision
Blurred_vision	vision
Body_ache	pain
Body_odor	unclassified
Bone_fracture	unclassified
Bone_pain	pain
Borderline_personality_disorder	behavior
Bowel_incontinence	sphincter
Bowel_irritability	unclassified
Bowel_problems	sphincter
Bowel_urgency	sphincter
Brachioradialis_areflexia	hyporeflexia
Brachioradialis_hyperreflexia	hyperreflexia
Brachioradialis_hyporeflexia	hyporeflexia
Brachycephaly	head
Brachyturricephaly	head
Bracket_epiphyses	unclassified
Bradycardia	unclassified
Bradykinesia	hypokinesia
Bradyopsia	vision
Bradyphrenia	cognitive
Brain_fog	cognitive
Branchial_anomaly	neck
Branchial_cyst	neck
Branchial_fistula	neck
Branchial_sinus	neck
Breakthrough_pain	pain
Bridged_sella_turcica	head
Brisk_reflexes	hyperreflexia
Brittle_hair	skin
Brittle_scalp_hair	skin
Broad_chin	head
Broad_face	head
Broad_forehead	head
Broad_long_bones	unclassified
Broad_nail	neck
Broad_neck	neck
Broad_skull	head
Broad-based_gait	gait
Brown_anomaly	eye_movements
Brudzynski_sign	neck
Bruits	neck
Brushfield_spots	vision
Bruxism	sleep
Bulging_epiphyses	unclassified
Bulimia	behavior
Bundle_branch_block	unclassified
Bursitis	unclassified
C2-C3_subluxation	unclassified
Cachexia	unclassified
Cafe_au_lait_spots	skin
Calcinosis	miscellaneous_muscle
Calf_muscle_hypertrophy	miscellaneous_muscle
Calf_muscle_hypoplasia	miscellaneous_muscle
Calf_muscle_pseudohypertrophy	miscellaneous_muscle
Calvarial_skull_defect	head
Camptotocormia	hypokinesia
Capsular_cataract	vision
Cardiac_conduction_abnormality	unclassified
Cardiac_shunt	unclassified
Cardiac_tamponade	unclassified
Cardiogenic_shock	unclassified
Carotid_bruit	neck
Carotid_sinus_syncope	dysautonomia
Cat_cry	speech
Cataplexy	sleep
Cataract	vision
Catatonia	hypertonia
Cautious_gait	gait
Central_corneal_dystrophy	vision
Central_heterochromia	vision
Central_hypotonia	hypotonia
Central_nail_canal	skin
Central_opacification_of_the_cornea	vision
Central_posterior_corneal_opacity	vision
Central_scotoma	vision
Centrocecal_scotoma	vision
Cephalocele	head
Cerebral_visual_impairment	vision
Cerulean_cataract	vision
Cervical_osteoarthritis	unclassified
Chaddock_sign	hyperreflexia
Chaotic_rapid_conjugate_ocular_movements	eye_movements
Chest_pain	pain
Chest_tightness	unclassified
Childhood_onset_sensorineural_hearing_impairment	cranial_nerve
Childhood_onset_short-limb_short_stature	unclassified
Childhood-onset_short-trunk_short_stature	unclassified
Childhood-onset_truncal_obesity	unclassified
Chills	unclassified
Chin_myoclonus	hyperkinesia
Chin_with_H-shaped_crease	head
Chin_with_horizontal_crease	head
Chin_with_vertical_crease	head
Choking_episodes	behavior
Chorea	hyperkinesia
Choreoathetosis	hyperkinesia
Christmas_tree_cataract	vision
Chronic_constipation	sphincter
Chronic_constipation	unclassified
Chronic_diarrhea	unclassified
Chronic_fatigue	fatigue
Chronic_monilial_nail_infection	skin
Chronic_pain	pain
Chronic_rhinitis	head
Chronic_rhinitis_due_to_narrow_nasal_airway	head
Chronotropic_incompetence	unclassified
Chvostek_sign	unclassified
Ciliary_body_coloboma	vision
Clasp_knife_spasticity	hypertonia
Claustrophobia	behavior
Cleft_in_skull_base	head
Cleft_of_chin	head
Clonic_seizure	seizure
Clonus	hyperreflexia
Clouded_consciousness	alertness
Cloverleaf_skull	head
Clumsiness	incoordination
Clumsy	incoordination
Cluster_headache	pain
Coarse_facial_features	head
Coarse_hair	skin
Cocaine_addiction	behavior
Cock-walk_gait	gait
Cognitive_epileptic_aura	seizure
Cognitive_fatigue	fatigue
Cognitive_impairment	cognitive
Cogwheel_rigidity	hypertonia
Cold_paresis	weakness
Cold-induced_sweating	skin
Cold-sensitive_myotonia	miscellaneous_muscle
Coldness	unclassified
Collectionism	behavior
Coloboma	vision
Color_vision_defect	vision
Color_vision_test_abnormality	vision
Coma	alertness
Coma	sleep
Compensatory_chin_depression	eye_movements
Compensatory_chin_elevation	eye_movements
Compensatory_face_turn_to_the_left	eye_movements
Compensatory_face_turn_to_the_right	eye_movements
Compensatory_head_posture	eye_movements
Compensatory_head_tilt_to_the_left_shoulder	eye_movements
Compensatory_head_tilt_to_the_right_shoulder	eye_movements
Complete_congenital_stationary_night_blindness	vision
Complete_heart_block_with_broad_QRS_complexes	unclassified
Complete_heart_block_with_narrow_QRS_complexes	unclassified
Complex_febrile_seizure	seizure
Concave_nail	neck
Concomitant_strabismus	eye_movements
Cone_monochromacy	vision
Cone-shaped_epiphyses_fused_within_their_metaphyses	unclassified
Cone-shaped_epiphysis	unclassified
Confusion	sleep
Confusional_arousal	sleep
Congenital_abnormal_hair_pattern	skin
Congenital_absence_of_gluteal_muscles	miscellaneous_muscle
Congenital_alopecia_totalis	skin
Congenital_atrioventricular_dissociation	unclassified
Congenital_bilateral_ptosis	cranial_nerve
Congenital_blindness	vision
Congenital_craniofacial_dysostosis	head
Congenital_curved_nail_of_fourth_toe	skin
Congenital_extraocular_muscle_anomaly	unclassified
Congenital_facial_diplegia	cranial_nerve
Congenital_fibrosis_of_extraocular_muscles	unclassified
Congenital_generalized_hypertrichosis	skin
Congenital_horizontal_nystagmus	eye_movements
Congenital_hypertrophy_of_retinal_pigment_epithelium	vision
Congenital_miosis	vision
Congenital_mitral_stenosis	unclassified
Congenital_muscular_torticollis	neck
Congenital_nystagmus	eye_movements
Congenital_posterior_occipital_alopecia	skin
Congenital_ptosis	cranial_nerve
Congenital_sensorineural_hearing_impairment	cranial_nerve
Congenital_stationary_night_blindness_with_abnormal_fundus	vision
Congenital_stationary_night_blindness_with_normal_fundus	vision
Congestive_heart_failure	unclassified
Congruous_heteronymous_hemianopia	vision
Congruous_homonymous_hemianopia	vision
Consecutive_esotropia	eye_movements
Consecutive_exotropia	eye_movements
Conspicuously_happy_disposition	behavior
Constant_exotropia	eye_movements
Constipation	sphincter
Constipation	unclassified
Constricted_iliac_wing	unclassified
Constriction_of_peripheral_visual_field	vision
Continuous_heart_murmur	unclassified
Convergence_excess_esotropia	eye_movements
Convulsive_status_epilepticus	seizure
Coralliform_cataract	vision
Cornea_verticillata	vision
Corneal_arcus	vision
Corneal_astigmatism	vision
Corneal_asymmetry	vision
Corneal_crystals	vision
Corneal_degeneration	vision
Corneal_erosion	vision
Corneal_keratic_precipitates	vision
Corneal_neovascularization	vision
Corneal_opacity	vision
Corneal_perforation	vision
Corneal_ulceration	vision
Coronal_craniosynostosis	head
Coronary_cataract	vision
Cortical_cataract	vision
Cortical_myoclonus	hyperkinesia
Cortical_pulverulent_cataract	vision
Cortical_sclerosis_of_the_iliac_wing	unclassified
Coxa_magna	unclassified
Cranial_asymmetry	head
Cranial_nerve_paralysis	cranial_nerve
Craniofacial_disproportion	head
Craniofacial_dysostosis	head
Craniofacial_dystonia	hyperkinesia
Craniosynostosis	head
Crumpled_long_bones	unclassified
Cryptozoospermia	unclassified
Crystalline_corneal_dystrophy	vision
Curly_hair	skin
Cyclic_esotropia	eye_movements
Cyclic_exotropia	eye_movements
Cyclodeviation	eye_movements
Cyclophoria	eye_movements
Cyclopia	vision
Cyclotropia	eye_movements
Daytime_sleepiness	sleep
Decerebrate_posture	hypertonia
Decerebrate_rigidity	hypertonia
Declarative_memory_loss	cognitive
Decorticate_posture	hypertonia
Decorticate_rigidity	hypertonia
Decreased_Achilles_reflex	hyporeflexia
Decreased_body_fat_percentage	unclassified
Decreased_body_mass_index	unclassified
Decreased_body_weight	unclassified
Decreased_calvarial_ossification	head
Decreased_cardiac_index	unclassified
Decreased_cardiac_output	unclassified
Decreased_corneal_reflex	vision
Decreased_corneal_sensation	vision
Decreased_cranial_base_ossification	head
Decreased_diastolic_blood_pressure	unclassified
Decreased_facial_expression	hypokinesia
Decreased_female_libido	unclassified
Decreased_fertility	unclassified
Decreased_fertility_in_females	unclassified
Decreased_fertility_in_males	unclassified
Decreased_head_circumference	head
Decreased_heart_rate_variability	unclassified
Decreased_lacrimation	cranial_nerve
Decreased_left_ventricular_end-diastolic_volume	unclassified
Decreased_libido	unclassified
Decreased_male_libido	unclassified
Decreased_mid-arm_muscle_circumference	miscellaneous_muscle
Decreased_number_of_sweat_glands	skin
Decreased_patellar_reflex	hyporeflexia
Decreased_sweating_due_to_autonomic_dysfunction	dysautonomia
Decreased_systolic_blood_pressure	unclassified
Decreased_tear_drainage	cranial_nerve
Decreased_vigilance	sleep
Decreased_waist_to_hip_ratio	unclassified
Decreased/absent_ankle_reflexes	hyporeflexia
Deep-set_nails	skin
Deeply_set_eye	vision
Deficit_in_nonword_repetition	speech
Deficit_in_phonologic_short-term_memory	cognitive
Deformed_sella_turcica	head
Deja_vu_aura	seizure
Delayed_closure_of_the_anterior_fontanelle	head
Delayed_cranial_suture_closure	head
Delayed_pneumatization_of_the_mastoid_process	head
Delayed_self-feeding_during_toddler_years	unclassified
Delirium	alertness
Delusions	behavior
Dementia	cognitive
Denervation_of_the_diaphragm	unclassified
Dense_calvaria	head
Dense_posterior_cortical_cataract	vision
Dependency_on_parenteral_nutrition	unclassified
Depigmented_fundus	vision
Depressed_glabella	head
Depression	behavior
Detrusor_sphincter_dyssynergia	sphincter
Deuteranomaly	vision
Deuteranopia	vision
Dialeptic_seizure	seizure
Diaphragmatic_eventration	unclassified
Diaphragmatic_weakness	weakness
Diarrhea	sphincter
Diarrhea	unclassified
Diastolic_heart_murmur	unclassified
Dichromacy	vision
Difficulty_adjusting_from_dark_to_light	vision
Difficulty_adjusting_from_light_to_dark	vision
Difficulty_adjusting_to_changes_in_luminance	vision
Difficulty_descending_stairs	gait
Difficulty_running	gait
Difficulty_walking	gait
Difficulty_walking_backward	gait
Diffuse_nuclear_cataract	vision
Diffuse_optic_disc_pallor	vision
Diminished_ability_to_concentrate	behavior
Diminished_health-related_quality_of_life	unclassified
Diminished_mental_health	unclassified
Diminished_motivation	behavior
Diminished_movement	hypokinesia
Diminished_physical_functioning	unclassified
Dimple_chin	head
Diplopia	eye_movements
Disequilibrium	gait
Disinhibition	behavior
Disproportionate_short_stature	unclassified
Disproportionate_short-limb_short_stature	unclassified
Disproportionate_tall_stature	unclassified
Dissociated_horizontal_deviation	eye_movements
Dissociated_sensory_loss	sensory
Dissociated_vertical_deviation	eye_movements
Dissociative_reaction	behavior
Distal_amyotrophy	atrophy
Distal_lower_limb_amyotrophy	atrophy
Distal_muscle_weakness	weakness
Distal_peripheral_sensory_neuropathy	sensory
Distal_sensory_impairment	sensory
Distal_sensory_impairment_of_all_modalities	sensory
Distal_sensory_loss_to_all_modalities	sensory
Distance_esotropia	eye_movements
Distance_exotropia	eye_movements
Distributive_shock	unclassified
Disturbance_of_consciousness	alertness
Disturbance_of_facial_expression	unclassified
Divergence_nystagmus	eye_movements
Dolichocephaly	head
Doll-like_facies	head
Dorsal_hirsutism	skin
Double_depressor_palsy	eye_movements
Double_elevator_palsy	eye_movements
Downbeat_nystagmus	eye_movements
Downgaze_palsy	eye_movements
Drop_attacks	sleep
Drowsiness	sleep
Drowsy	alertness
Drowsy_on_examination	alertness
Drug_addiction	behavior
Dry_hair	skin
Dry_skin	skin
Duane_anomaly	eye_movements
Duplication_of_the_sella_turcica	head
Dysarthria	speech
Dysautonomia	dysautonomia
Dyschromatopsia	vision
Dysdiadochokinesis	incoordination
Dysgraphia	speech
Dyskinesia	hyperkinesia
Dysmenorrhea	unclassified
Dysmetria	incoordination
Dysmetric_horizontal_saccades	eye_movements
Dysmetric_saccades	eye_movements
Dysmetric_vertical_saccades	eye_movements
Dysmorphic_face	head
Dysostosis_multiplex	unclassified
Dyspareunia	unclassified
Dyspepsia	pain
Dysphasia	speech
Dysphonia	speech
Dysphoria	behavior
Dysplastic_iliac_wing	unclassified
Dyssynergia	incoordination
Dystaxia	incoordination
Dystonia	hyperkinesia
Dystonia_limb	hyperkinesia
Dystonia_of_head	hyperkinesia
Dystonic_disorder	hyperkinesia
Dystonic_dysphonia	hyperkinesia
Dystonic_gait	gait
Dystonic_posture	hyperkinesia
Dystrophic_fingernails	skin
Dystrophic_toenail	skin
Dysuria	sphincter
Early_balding	skin
Early_chronotype	sleep
Early_onset_absence_seizures	seizure
Early_satiety	unclassified
Easy_fatigability	fatigue
Eating-induced_seizure	seizure
Eccentric_visual_fixation	eye_movements
Echolalia	speech
Ectopia_lentis	vision
Ectopia_pupillae	vision
Elbow_clonus	hyperreflexia
Elbow_hypertrichosis	skin
Elbow_pain	pain
Elevated_diastolic_blood_pressure	unclassified
Elevated_imprint_of_the_transverse_sinuses	head
Elevated_left_atrial_pressure	unclassified
Elevated_mean_arterial_pressure	unclassified
Elevated_right_atrial_pressure	unclassified
Elevated_right_ventricular_systolic_pressure	unclassified
Elevated_systolic_blood_pressure	unclassified
Elfin_facies	head
Elongated_sella_turcica	head
Emotional_blunting	behavior
Emotional_hypersensitivity	behavior
Emotional_insecurity	behavior
Emotional_lability	behavior
Encopresis	sphincter
Enlarged_cisterna_magna	head
Enlarged_epiphyses	unclassified
Enlarged_joints	unclassified
Enlarged_posterior_fossa	head
Enlargement_of_the_ankles	unclassified
Enuresis	sphincter
Enuresis_diurna	sphincter
Enuresis_nocturna	sphincter
Epigastric_pain	pain
Epilepsia_partialis_continua	seizure
Epileptic_aura	seizure
Epileptic_spasm	seizure
Epiphora	cranial_nerve
Epiphyseal_deformities_of_tubular_bones	unclassified
Epiphyseal_streaking	unclassified
Episodic_abdominal_pain	pain
Episodic_ataxia	incoordination
Episodic_fatigue	fatigue
Episodic_flaccid_weakness	hypotonia
Episodic_generalized_hypotonia	unclassified
Episodic_hyperhidrosis	dysautonomia
Episodic_hypersomnia	sleep
Episodic_hypertension	unclassified
Episodic_pain	pain
Episodic_paroxysmal_anxiety	behavior
Episodic_vomiting	unclassified
Erectile_dysfunction	sphincter
Erratic_myoclonus	hyperkinesia
Erythema	skin
Erythromelalgia	pain
Esodeviation	eye_movements
Esophoria	eye_movements
Esotropia	eye_movements
Eunuchoid_habitus	unclassified
Euphoria	behavior
Excessive_daytime_somnolence	sleep
Excyclophoria	eye_movements
Excyclotropia	eye_movements
Exercise-induced_muscle_fatigue	fatigue
Exercise-induced_myalgia	pain
Exodeviation	eye_movements
Exophoria	eye_movements
Exotropia	eye_movements
Experiential_epileptic_aura	seizure
Expressionless_face	hypokinesia
Expressive_aphasia	speech
Extension_of_hair_growth_on_temples_to_lateral_eyebrow	head
Extensor_plantar_response_left	hyperreflexia
Extensor_posture	hypertonia
Extensor_rigidity	hypertonia
External_ophthalmoplegia	eye_movements
Externally_rotated_hips	miscellaneous_muscle
Extra_fontanelles	head
Extremity_limb_rigidity	hypertonia
Eye_movement-induced_pain	pain
Eye_poking	hyperkinesia
Eyelid_myoclonia_seizure	seizure
Eyelid_myoclonus	hyperkinesia
Facial_asymmetry	head
Facial_cleft	head
Facial_diplegia	cranial_nerve
Facial_dystonia	hyperkinesia
Facial_grimacing	hyperkinesia
Facial_hirsutism	skin
Facial_hyperostosis	head
Facial_hypertrichosis	skin
Facial_hypotonia	hypotonia
Facial_muscle_hypertrophy	miscellaneous_muscle
Facial_myokimia	miscellaneous_muscle
Facial_palsy_secondary_to_cranial_hyperostosis	head
Facial_shape_deformation	head
Facial_tic	hyperkinesia
Facial_tics	hyperkinesia
Failure_to_thrive	unclassified
Failure_to_thrive_in_infancy	unclassified
Falls	gait
Falls_accidental	gait
Falls_frequent	gait
False_perception_of_self-motion	cranial_nerve
Fasciculations	atrophy
Fast-growing_nails	skin
Fatigable_weakness	fatigue
Fatigable_weakness_of_bulbar_muscles	fatigue
Fatigable_weakness_of_chewing_muscles	fatigue
Fatigable_weakness_of_distal_limb_muscles	fatigue
Fatigable_weakness_of_neck_muscles	fatigue
Fatigable_weakness_of_respiratory_muscles	fatigue
Fatigable_weakness_of_skeletal_muscles	fatigue
Fatigable_weakness_of_speech_muscles	fatigue
Fatigable_weakness_of_swallowing_muscles	fatigue
Fatiguable_weakness_of_proximal_limb_muscles	fatigue
Fatigue	fatigue
Favorable_response_of_weakness_to_acetylcholine_esterase_inhibitors	miscellaneous_muscle
Favorable_response_to_dopaminergic_medication	hypokinesia
Febrile_seizure_(within_the_age_range_of_3_months_to_6_years)	seizure
Febrile_seizure_outside_the_age_of_3_months_to_6_years	seizure
Febrile_status_epilepticus	seizure
fecal_incontinence	sphincter
Feculent_vomiting	unclassified
Feeding_difficulties	unclassified
Feeding_difficulties_in_infancy	unclassified
Female_anorgasmia	unclassified
Female_infertility	unclassified
Female_sexual_dysfunction	unclassified
Fetor_hepaticus	unclassified
Fever	unclassified
Fidgety	hyperkinesia
Fine_hair	skin
Finger_agnosia	cognitive
Finger_flexor_weakness	weakness
Finger_pain	pain
Fingernail_dysplasia	skin
First_degree_atrioventricular_block	unclassified
First_dorsal_interossei_muscle_atrophy	atrophy
First_dorsal_interossei_muscle_weakness	weakness
Fish_odor	unclassified
Fixed_facial_expression	hypokinesia
Fixed_head_retroflexion	head
Fixed_splitting_of_the_second_heart_sound	unclassified
Flaccid_motor_tone	hypotonia
Flaccid_paralysis_of_arm	hypotonia
Flank_pain	pain
Flared_iliac_wing	unclassified
Flat_acetabular_roof	unclassified
Flat_cornea	vision
Flat_face	head
Flat_forehead	head
Flat_occiput	head
Flat_posterior_fossa	head
Flat_sella_turcica	head
Flattened_epiphysis	unclassified
Flattened_femoral_epiphysis	unclassified
Flattened_squared-off_epiphyses_of_tubular_bones	unclassified
Flatulence	unclassified
Flexion_limitation_of_toes	unclassified
Flinging_movements_of_legs	hyperkinesia
Fluctuations_in_consciousness	sleep
Focal_atonic_seizure	seizure
Focal_automatism_seizure	seizure
Focal_autonomic_seizure	seizure
Focal_autonomic_seizure_with_epigastric_sensation/nausea/vomiting/other_gastrointestinal_phenomena	seizure
Focal_autonomic_seizure_with_erection	seizure
Focal_autonomic_seizure_with_hypoventilation/hyperventilation/altered_respiration	seizure
Focal_autonomic_seizure_with_lacrimation	seizure
Focal_autonomic_seizure_with_pallor/flushing	seizure
Focal_autonomic_seizure_with_palpitations/tachycardia/bradycardia/asystole	seizure
Focal_autonomic_seizure_with_piloerection	seizure
Focal_autonomic_seizure_with_pupillary_dilation/constriction	seizure
Focal_autonomic_seizure_with_urge_to_urinate/defecate	seizure
Focal_aware_atonic_seizure	seizure
Focal_aware_automatism_seizure	seizure
Focal_aware_autonomic_seizure	seizure
Focal_aware_autonomic_seizure_with_epigastric_sensation/nausea/vomiting/other_gastrointestinal_phenomena	seizure
Focal_aware_autonomic_seizure_with_erection	seizure
Focal_aware_autonomic_seizure_with_hypoventilation/hyperventilation/altered_respiration	seizure
Focal_aware_autonomic_seizure_with_lacrimation	seizure
Focal_aware_autonomic_seizure_with_pallor/flushing	seizure
Focal_aware_autonomic_seizure_with_palpitations/tachycardia/bradycardia/asystole	seizure
Focal_aware_autonomic_seizure_with_piloerection	seizure
Focal_aware_autonomic_seizure_with_pupillary_dilation/constriction	seizure
Focal_aware_autonomic_seizure_with_urge_to_urinate/defecate	seizure
Focal_aware_behavior_arrest_seizure	seizure
Focal_aware_bilateral_motor_seizure	seizure
Focal_aware_clonic_seizure	seizure
Focal_aware_cognitive_seizure	seizure
Focal_aware_cognitive_seizure_with_anomia	seizure
Focal_aware_cognitive_seizure_with_auditory_agnosia	seizure
Focal_aware_cognitive_seizure_with_conduction_dysphasia/aphasia	seizure
Focal_aware_cognitive_seizure_with_deja_vu/jamais_vu	seizure
Focal_aware_cognitive_seizure_with_dissociation	seizure
Focal_aware_cognitive_seizure_with_dyscalculia/acalculia	seizure
Focal_aware_cognitive_seizure_with_dysgraphia/agraphia	seizure
Focal_aware_cognitive_seizure_with_dyslexia/alexia	seizure
Focal_aware_cognitive_seizure_with_expressive_dysphasia/aphasia	seizure
Focal_aware_cognitive_seizure_with_forced_thinking	seizure
Focal_aware_cognitive_seizure_with_hallucination	seizure
Focal_aware_cognitive_seizure_with_illusion	seizure
Focal_aware_cognitive_seizure_with_left-right_confusion	seizure
Focal_aware_cognitive_seizure_with_memory_impairment	seizure
Focal_aware_cognitive_seizure_with_neglect	seizure
Focal_aware_cognitive_seizure_with_receptive_dysphasia/aphasia	seizure
Focal_aware_emotional_seizure	seizure
Focal_aware_emotional_seizure_with_agitation	seizure
Focal_aware_emotional_seizure_with_anger	seizure
Focal_aware_emotional_seizure_with_crying	seizure
Focal_aware_emotional_seizure_with_fear/anxiety/panic	seizure
Focal_aware_emotional_seizure_with_laughing	seizure
Focal_aware_emotional_seizure_with_paranoia	seizure
Focal_aware_emotional_seizure_with_pleasure	seizure
Focal_aware_epileptic_spasm	seizure
Focal_aware_head_nodding_automatism_seizure	seizure
Focal_aware_hemiclonic_seizure	seizure
Focal_aware_hemifacial_clonic_seizure	seizure
Focal_aware_hyperkinetic_seizure	seizure
Focal_aware_manual_automatism_seizure	seizure
Focal_aware_motor_seizure	seizure
Focal_aware_motor_seizure_with_dysarthria/anarthria	seizure
Focal_aware_motor_seizure_with_dystonia	seizure
Focal_aware_motor_seizure_with_negative_myoclonus	seizure
Focal_aware_motor_seizure_with_paresis/paralysis	seizure
Focal_aware_motor_seizure_with_version	seizure
Focal_aware_myoclonic_seizure	seizure
Focal_aware_non-motor_seizure	seizure
Focal_aware_orofacial_automatism_seizure	seizure
Focal_aware_pedal_automatism_seizure	seizure
Focal_aware_perseverative_automatism_seizure	seizure
Focal_aware_seizure	seizure
Focal_aware_sensory_seizure	seizure
Focal_aware_sensory_seizure_with_auditory_features	seizure
Focal_aware_sensory_seizure_with_cephalic_sensation	seizure
Focal_aware_sensory_seizure_with_gustatory_features	seizure
Focal_aware_sensory_seizure_with_hot-cold_sensations	seizure
Focal_aware_sensory_seizure_with_somatosensory_features	seizure
Focal_aware_sensory_seizure_with_vestibular_features	seizure
Focal_aware_sensory_seizure_with_visual_features	seizure
Focal_aware_sexual_automatism_seizure	seizure
Focal_aware_tonic_seizure	seizure
Focal_aware_undressing_automatism_seizure	seizure
Focal_aware_verbal_automatism_seizure	seizure
Focal_aware_vocal_automatism_seizure	seizure
Focal_behavior_arrest_seizure	seizure
Focal_bilateral_motor_seizure	seizure
Focal_clonic_seizure	seizure
Focal_cognitive_seizure	seizure
Focal_cognitive_seizure_with_anomia	seizure
Focal_cognitive_seizure_with_auditory_agnosia	seizure
Focal_cognitive_seizure_with_conduction_dysphasia/aphasia	seizure
Focal_cognitive_seizure_with_deja_vu/jamais_vu	seizure
Focal_cognitive_seizure_with_dissociation	seizure
Focal_cognitive_seizure_with_dyscalculia/acalculia	seizure
Focal_cognitive_seizure_with_dysgraphia/agraphia	seizure
Focal_cognitive_seizure_with_dyslexia/alexia	seizure
Focal_cognitive_seizure_with_expressive_dysphasia/aphasia	seizure
Focal_cognitive_seizure_with_forced_thinking	seizure
Focal_cognitive_seizure_with_hallucination	seizure
Focal_cognitive_seizure_with_illusion	seizure
Focal_cognitive_seizure_with_left-right_confusion	seizure
Focal_cognitive_seizure_with_memory_impairment	seizure
Focal_cognitive_seizure_with_neglect	seizure
Focal_cognitive_seizure_with_receptive_dysphasia/aphasia	seizure
Focal_dystonia	hyperkinesia
Focal_emotional_seizure	seizure
Focal_emotional_seizure_with_agitation	seizure
Focal_emotional_seizure_with_anger	seizure
Focal_emotional_seizure_with_crying	seizure
Focal_emotional_seizure_with_fear/anxiety/panic	seizure
Focal_emotional_seizure_with_laughing	seizure
Focal_emotional_seizure_with_paranoia	seizure
Focal_emotional_seizure_with_pleasure	seizure
Focal_head_nodding_automatism_seizure	seizure
Focal_hemiclonic_seizure	seizure
Focal_hemifacial_clonic_seizure	seizure
Focal_hyperkinetic_seizure	seizure
Focal_impaired_awareness_atonic_seizure	seizure
Focal_impaired_awareness_automatism_seizure	seizure
Focal_impaired_awareness_autonomic_seizure	seizure
Focal_impaired_awareness_autonomic_seizure_with_epigastric_sensation/nausea/vomiting/other_gastrointestinal_phenomena	seizure
Focal_impaired_awareness_autonomic_seizure_with_erection	seizure
Focal_impaired_awareness_autonomic_seizure_with_hypoventilation/hyperventilation/altered_respiration	seizure
Focal_impaired_awareness_autonomic_seizure_with_lacrimation	seizure
Focal_impaired_awareness_autonomic_seizure_with_pallor/flushing	seizure
Focal_impaired_awareness_autonomic_seizure_with_palpitations/tachycardia/bradycardia/asystole	seizure
Focal_impaired_awareness_autonomic_seizure_with_piloerection	seizure
Focal_impaired_awareness_autonomic_seizure_with_pupillary_dilation/constriction	seizure
Focal_impaired_awareness_autonomic_seizure_with_urge_to_urinate/defecate	seizure
Focal_impaired_awareness_behavior_arrest_seizure	seizure
Focal_impaired_awareness_bilateral_motor_seizure	seizure
Focal_impaired_awareness_clonic_seizure	seizure
Focal_impaired_awareness_cognitive_seizure	seizure
Focal_impaired_awareness_cognitive_seizure_with_anomia	seizure
Focal_impaired_awareness_cognitive_seizure_with_auditory_agnosia	seizure
Focal_impaired_awareness_cognitive_seizure_with_conduction_dysphasia/aphasia	seizure
Focal_impaired_awareness_cognitive_seizure_with_deja_vu/jamais_vu	seizure
Focal_impaired_awareness_cognitive_seizure_with_dyscalculia/acalculia	seizure
Focal_impaired_awareness_cognitive_seizure_with_dysgraphia/agraphia	seizure
Focal_impaired_awareness_cognitive_seizure_with_dyslexia/alexia	seizure
Focal_impaired_awareness_cognitive_seizure_with_expressive_dysphasia/aphasia	seizure
Focal_impaired_awareness_cognitive_seizure_with_forced_thinking	seizure
Focal_impaired_awareness_cognitive_seizure_with_hallucination	seizure
Focal_impaired_awareness_cognitive_seizure_with_illusion	seizure
Focal_impaired_awareness_cognitive_seizure_with_left-right_confusion	seizure
Focal_impaired_awareness_cognitive_seizure_with_memory_impairment	seizure
Focal_impaired_awareness_cognitive_seizure_with_neglect	seizure
Focal_impaired_awareness_cognitive_seizure_with_receptive_dysphasia/aphasia	seizure
Focal_impaired_awareness_emotional_seizure	seizure
Focal_impaired_awareness_emotional_seizure_with_agitation	seizure
Focal_impaired_awareness_emotional_seizure_with_anger	seizure
Focal_impaired_awareness_emotional_seizure_with_crying	seizure
Focal_impaired_awareness_emotional_seizure_with_fear/anxiety/panic	seizure
Focal_impaired_awareness_emotional_seizure_with_laughing	seizure
Focal_impaired_awareness_emotional_seizure_with_paranoia	seizure
Focal_impaired_awareness_emotional_seizure_with_pleasure	seizure
Focal_impaired_awareness_epileptic_spasm	seizure
Focal_impaired_awareness_head_nodding_automatism_seizure	seizure
Focal_impaired_awareness_hemiclonic_seizure	seizure
Focal_impaired_awareness_hemifacial_clonic_seizure	seizure
Focal_impaired_awareness_hyperkinetic_seizure	seizure
Focal_impaired_awareness_manual_automatism_seizure	seizure
Focal_impaired_awareness_motor_seizure	seizure
Focal_impaired_awareness_motor_seizure_with_dysarthria/anarthria	seizure
Focal_impaired_awareness_motor_seizure_with_dystonia	seizure
Focal_impaired_awareness_motor_seizure_with_negative_myoclonus	seizure
Focal_impaired_awareness_motor_seizure_with_paresis/paralysis	seizure
Focal_impaired_awareness_motor_seizure_with_version	seizure
Focal_impaired_awareness_myoclonic_seizure	seizure
Focal_impaired_awareness_non-motor_seizure	seizure
Focal_impaired_awareness_orofacial_automatism_seizure	seizure
Focal_impaired_awareness_pedal_automatism_seizure	seizure
Focal_impaired_awareness_perseverative_automatism_seizure	seizure
Focal_impaired_awareness_seizure	seizure
Focal_impaired_awareness_seizure_with_dissociation_at_onset	seizure
Focal_impaired_awareness_sensory_seizure	seizure
Focal_impaired_awareness_sensory_seizure_with_auditory_features	seizure
Focal_impaired_awareness_sensory_seizure_with_cephalic_sensation	seizure
Focal_impaired_awareness_sensory_seizure_with_gustatory_features	seizure
Focal_impaired_awareness_sensory_seizure_with_hot-cold_sensations	seizure
Focal_impaired_awareness_sensory_seizure_with_somatosensory_features	seizure
Focal_impaired_awareness_sensory_seizure_with_vestibular_features	seizure
Focal_impaired_awareness_sensory_seizure_with_visual_features	seizure
Focal_impaired_awareness_sexual_automatism_seizure	seizure
Focal_impaired_awareness_tonic_seizure	seizure
Focal_impaired_awareness_undressing_automatism_seizure	seizure
Focal_impaired_awareness_verbal_automatism_seizure	seizure
Focal_impaired_awareness_vocal_automatism_seizure	seizure
Focal_manual_automatism_seizure	seizure
Focal_motor_seizure	seizure
Focal_motor_seizure_with_dysarthria/anarthria	seizure
Focal_motor_seizure_with_dystonia	seizure
Focal_motor_seizure_with_negative_myoclonus	seizure
Focal_motor_seizure_with_paresis/paralysis	seizure
Focal_motor_seizure_with_version	seizure
Focal_motor_status_epilepticus	seizure
Focal_myoclonic_seizure	seizure
Focal_neonatal_sequential_seizure	seizure
Focal_non-convulsive_status_epilepticus_with_impairment_of_consciousness	seizure
Focal_non-convulsive_status_epilepticus_without_coma	seizure
Focal_non-convulsive_status_epilepticus_without_impairment_of_consciousness	seizure
Focal_non-motor_seizure	seizure
Focal_orofacial_automatism_seizure	seizure
Focal_pedal_automatism_seizure	seizure
Focal_perseverative_automatism_seizure	seizure
Focal_seizure_with_eyelid_myoclonia	seizure
Focal_sensory_seizure	seizure
Focal_sensory_seizure_with_auditory_features	seizure
Focal_sensory_seizure_with_cephalic_sensation	seizure
Focal_sensory_seizure_with_gustatory_features	seizure
Focal_sensory_seizure_with_hot-cold_sensations	seizure
Focal_sensory_seizure_with_somatosensory_features	seizure
Focal_sensory_seizure_with_vestibular_features	seizure
Focal_sensory_seizure_with_visual_features	seizure
Focal_sexual_automatism_seizure	seizure
Focal_tonic_seizure	seizure
Focal_undressing_automatism_seizure	seizure
Focal_verbal_automatism_seizure	seizure
Focal_vocal_automatism_seizure	seizure
Focal-onset_epileptic_spasm	seizure
Focal-onset_seizure	seizure
Focal-onset_seizure_evolving_into_bilateral_convulsive_status_epilepticus	seizure
Foot_dorsiflexor_weakness	weakness
Foot_pain	pain
Fourth_cranial_nerve_palsy	eye_movements
Fourth_heart_sound	unclassified
Fractured_acetabular_part_of_hip_bone	unclassified
Fractured_ankle	unclassified
Fractured_head	head
Fractured_ilium	unclassified
Fractured_orbit_of_skull	head
Fractured_sternoclavicular_joint	unclassified
Fragile_nails	skin
Fragmented_epiphyses	unclassified
Fragmented_irregular_epiphyses	unclassified
Frailty	unclassified
Freezing_of_gait	gait
Frequent_falls	gait
Frequent_temper_tantrums	behavior
Frog-leg_posture	unclassified
Frontal_balding	skin
Frontal_bossing	head
Frontal_bossing	head
Frontal_hirsutism	skin
Frontal_lobe_dementia	cognitive
Frontal_upsweep_of_hair	skin
Frontalis_muscle_weakness	cranial_nerve
Frontolimbic_dementia	cognitive
Frontotemporal_dementia	cognitive
Frontotemporal_hypertrichosis	skin
Full_cheeks	head
Fully_accomodative_esotropia	eye_movements
Functional_abnormality_of_male_internal_genitalia	unclassified
Functional_abnormality_of_the_bladder	unclassified
Fundus_atrophy	vision
Fundus_hemorrhage	vision
Fused_nails	skin
Gait_apraxia	gait
Gait_clumsy	gait
Gait_difficulty	gait
Gait_festinating	hypokinesia
Gait_freezing	hypokinesia
Gait_imbalance	gait
Gait_instability	gait
Gait_parkinsonian	hypokinesia
Gait_scissor	gait
Gait_shuffling	hypokinesia
Gait_slow	hypokinesia
Gait_staggering	gait
Gait_stiff	gait
Gait_stiff_legged	gait
Gait_tip_toe	gait
Gait_unsteady	gait
Gait_unsteady_wide_based	gait
Galactorrhea	unclassified
Gallop_rhythm	unclassified
Gangrene	unclassified
Gastrocnemius_myalgia	pain
Gastroenteritis-related_afebrile_seizure	seizure
Gastrointestinal_dysmotility	dysautonomia
Gastrojejunal_tube_feeding_in_infancy	unclassified
Gastrostomy_tube_feeding_in_infancy	unclassified
Gaze-evoked_horizontal_nystagmus	eye_movements
Gaze-evoked_nystagmus	eye_movements
Gegenhalten	hypertonia
General_unsteadiness	gait
Generalized_amyotrophy	atrophy
Generalized_anhidrosis	dysautonomia
Generalized_atonic_seizure	seizure
Generalized_clonic_seizure	seizure
Generalized_convulsive_status_epilepticus	seizure
Generalized_dystonia	hyperkinesia
Generalized_hirsutism	skin
Generalized_hyperreflexia	hyperreflexia
Generalized_hypertrichosis	skin
Generalized_hypotonia	hypotonia
Generalized_hypotonia	unclassified
Generalized_hypotonia_due_to_defect_at_the_neuromuscular_junction	hypotonia
Generalized_hypotrichosis	skin
Generalized_limb_muscle_atrophy	atrophy
Generalized_motor_hypertrophy	miscellaneous_muscle
Generalized_muscle_hypertrophy	miscellaneous_muscle
Generalized_muscle_hypertrophy	miscellaneous_muscle
Generalized_muscle_weakness	weakness
Generalized_myoclonic_seizure	seizure
Generalized_myoclonic-atonic_seizure	seizure
Generalized_myoclonic-tonic-clonic_seizure	seizure
Generalized_neonatal_hypotonia	unclassified
Generalized_non-convulsive_status_epilepticus_without_coma	seizure
Generalized_non-motor_(absence)_seizure	seizure
Generalized_opacification_of_the_cornea	vision
Generalized_tonic_seizure	seizure
Generalized_weakness_of_limb_muscles	weakness
Generalized-onset_epileptic_spasm	seizure
Generalized-onset_motor_seizure	seizure
Generalized-onset_seizure	seizure
Geophagia	behavior
Glabellar_reflex	cognitive
Glaucoma	vision
Glaucomatous_visual_field_defect	vision
Global_systolic_dysfunction	unclassified
Globe_retraction_and_deviation_on_abduction	eye_movements
Good_response_to_levodopa	hypokinesia
Gout	unclassified
Gowers_sign	weakness
Grammar-specific_speech_disorder	speech
Grasp_reflex	cognitive
Groin_pain	pain
Grouped_congenital_hypertrophy_of_retinal_pigment_epithelium	vision
Growth_abnormality	unclassified
Growth_delay	unclassified
Growth_without_growth_hormone	unclassified
Gustatory_lacrimation	cranial_nerve
Gustatory_sweating	skin
Hair-pulling	behavior
Halberd-shaped_pelvis	unclassified
Hallucinations	behavior
Hand_apraxia	cognitive
Hand_grip_myotonia	miscellaneous_muscle
Hand_muscle_weakness	weakness
Hand_pain	pain
Hand_paresthesia	sensory
Hand_stiffness	hypertonia
Hand_tremor	tremor
Handgrip_myotonia	miscellaneous_muscle
Happy_demeanor	behavior
Head_tremor	tremor
Head-banging	behavior
Headache	pain
Hearing_abnormality	cranial_nerve
Hearing_impairment	cranial_nerve
Heart_block	unclassified
Heart_murmur	unclassified
Heavy_supraorbital_ridges	head
Hemeralopia	vision
Hemianopia	vision
Hemiareflexia	hyporeflexia
Hemiballismus	hyperkinesia
Hemidystonia	hyperkinesia
Hemifacial_atrophy	head
Hemifacial_hypertrophy	head
Hemifacial_hypoplasia	head
Hemifacial_spasm	hyperkinesia
Heroin_addiction	behavior
Herpetiform_corneal_ulceration	vision
Heterochromia_iridis	vision
Heteronymous_hemianopia	vision
Heterophoria	eye_movements
Heterotropia	eye_movements
High_anterior_hairline	head
High_forehead	head
High_hypermetropia	vision
High_iliac_wing	unclassified
High_myopia	vision
High_pitched_voice	speech
High_posterior_hairline	head
High-frequency_hearing_impairment	cranial_nerve
High-frequency_sensorineural_hearing_impairment	cranial_nerve
High-output_congestive_heart_failure	unclassified
High-pitched_cry	speech
Hip_adductor_weakness	weakness
Hip_dysplasia	unclassified
Hip_flexor_weakness	weakness
Hip_osteoarthritis	unclassified
Hip_pain	pain
Hirsutism	skin
History_of_a_fall	gait
Histrionic_personality_disorder	behavior
Hoarse_cry	speech
Hoarse_voice	speech
Hobby_horse_gait	gait
Hoffman_reflex_positive	hyperreflexia
Hoffman_sign_present	hyperreflexia
Holosystolic_murmur	unclassified
Homonymous_hemianopia	vision
Horizontal_incomitant_strabismus	eye_movements
Horizontal_jerk_nystagmus	eye_movements
Horizontal_nystagmus	eye_movements
Horizontal_opticokinetic_nystagmus	eye_movements
Horizontal_pendular_nystagmus	eye_movements
Horizontal_supranuclear_gaze_palsy	eye_movements
Hostility	behavior
Hot_flashes	unclassified
Hot_water-induced_seizure	seizure
Hydrophobia	behavior
Hyperactive_Achilles_reflex	hyperreflexia
Hyperactive_bowel_sounds	unclassified
Hyperactive_deep_tendon_reflexes	hyperreflexia
Hyperactive_patellar_reflex	hyperreflexia
Hyperactivity	behavior
Hyperacusis	cranial_nerve
Hyperconvex_fingernails	skin
Hyperconvex_nail	skin
Hyperconvex_thumb_nails	skin
Hyperconvex_toenail	skin
Hyperdeviation	eye_movements
Hyperesthesia	sensory
Hyperexplexia	hyperkinesia
Hyperhidrosis	dysautonomia
Hyperkinesia	hyperkinesia
Hyperkinetic_status_epilepticus	seizure
Hypermetria	incoordination
Hypermetric_downward_saccades	eye_movements
Hypermetric_horizontal_saccades	eye_movements
Hypermetric_saccades	eye_movements
Hypermetropia	vision
Hyperopic_astigmatism	vision
Hyperorality	behavior
Hyperperistalsis	dysautonomia
Hyperphoria	eye_movements
Hyperpigmentation_of_the_fundus	vision
Hyperreflexia	hyperreflexia
Hyperreflexia	hyperreflexia
hyperreflexia_generalized	hyperreflexia
Hyperreflexia_in_upper_limbs	hyperreflexia
Hyperreflexia_proximally	hyperreflexia
Hypersexuality	behavior
Hypersomnia	sleep
Hypertelorism	head
Hypertelorism	vision
Hypertension	unclassified
Hypertension_associated_with_pheochromocytoma	unclassified
Hypertensive_crisis	unclassified
Hypertonia	hypertonia
Hypertonia	hypertonia
Hypertrichosis	skin
Hypertrophy_of_lower_leg_muscles	miscellaneous_muscle
hypertrophy_sternocleidomastoid	miscellaneous_muscle
Hypertropia	eye_movements
Hypervolemia	unclassified
Hypnagogic_hallucinations	sleep
Hypnic_headache	pain
Hypnopompic_hallucinations	sleep
Hypoactive_bowel_sounds	unclassified
Hypodeviation	eye_movements
Hypodipsia	behavior
Hypoesthesia	sensory
Hypogeusia	cranial_nerve
Hypoglycemic_coma	sleep
Hypohidrosis	dysautonomia
Hypohidrosis_or_hyperhidrosis	dysautonomia
Hypokinesia	hypokinesia
Hypokinesia	hypokinesia
hypomelanotic_macule	skin
Hypometric_horizontal_saccades	eye_movements
Hypometric_saccades	eye_movements
Hypometric_upward_saccades	eye_movements
Hypomimia	hypokinesia
Hypomimic_face	hypokinesia
Hyponasal_speech	speech
Hypoperistalsis	dysautonomia
Hypophoria	eye_movements
Hypopigmentation_of_the_fundus	vision
Hypoplasia_of_facial_musculature	head
Hypoplasia_of_the_diaphragm	unclassified
Hypoplasia_of_the_eccrine_sweat_glands	skin
Hypoplasia_of_the_musculature	miscellaneous_muscle
Hypoplasia_of_the_musculature_of_the_pelvis	miscellaneous_muscle
Hypoplasia_of_the_upper_arm_musculature	miscellaneous_muscle
Hypoplastic_acetabulae	unclassified
Hypoplastic_carotid_canal	head
Hypoplastic_fifth_fingernail	skin
Hypoplastic_fifth_toenail	skin
Hypoplastic_fingernail	skin
Hypoplastic_ilia	unclassified
Hypoplastic_iliac_body	unclassified
Hypoplastic_iliac_wing	unclassified
Hypoplastic_inferior_ilia	unclassified
Hypoplastic_inferior_pubic_rami	unclassified
Hypoplastic_pelvis	unclassified
Hypoplastic_pubic_bone	unclassified
Hypoplastic_pubic_rami	unclassified
Hypoplastic_sweat_glands	skin
Hypoplastic_thumbnail	skin
Hypoplastic_toenails	skin
Hyporeflective_spaces_on_macular_OCT	vision
Hyporeflexia	hyporeflexia
Hyporeflexia	hyporeflexia
Hyporeflexia_of_lower_limbs	hyporeflexia
Hyporeflexia_of_upper_limbs	hyporeflexia
Hypotelorism	vision
Hypotension	unclassified
Hypotonia	hypotonia
Hypotonia_truncal	hypotonia
Hypotrophy_of_the_small_hand_muscles	miscellaneous_muscle
Hypotropia	eye_movements
Hypovolemia	unclassified
Hypovolemic_shock	unclassified
Icterus	unclassified
Iliac_crest_serration	unclassified
Iliac_horns	unclassified
Impaired_ability_to_bathe_oneself	unclassified
Impaired_ability_to_dress_oneself	unclassified
Impaired_ability_to_form_peer_relationships	behavior
Impaired_ability_to_organize	cognitive
Impaired_ability_to_plan	cognitive
Impaired_ability_to_shift_attention	cognitive
Impaired_arm_swing	hypokinesia
Impaired_balance	gait
Impaired_blink_rate	hypokinesia
Impaired_climbing_stairs	gait
Impaired_continence	sphincter
Impaired_convergence	eye_movements
Impaired_distal_proprioception	sensory
Impaired_distal_tactile_sensation	sensory
Impaired_distal_vibration_sensation	sensory
Impaired_executive_functioning	cognitive
Impaired_feeding_ability	unclassified
Impaired_finger_to_nose_test	incoordination
Impaired_hand_dexterity	incoordination
Impaired_horizontal_smooth_pursuit	eye_movements
Impaired_myocardial_contractility	unclassified
Impaired_neck-righting_reflex	gait
Impaired_ocular_abduction	eye_movements
Impaired_ocular_adduction	eye_movements
Impaired_proprioception	sensory
Impaired_pursuit_initiation_and_maintenance	eye_movements
Impaired_self_monitoring	cognitive
Impaired_smooth_pursuit	eye_movements
Impaired_social_interactions	behavior
Impaired_tandem_gait	gait
Impaired_task_monitoring	cognitive
Impaired_toileting_ability	unclassified
Impaired_transferring_ability	unclassified
Impaired_turns	hypokinesia
Impaired_use_of_nonverbal_behaviors	behavior
Impaired_vibration_sensation_at_the_ankles	sensory
Impaired_vibration_sensation_in_the_lower_limbs	sensory
Impaired_vibratory_sensation	sensory
Impaired_visually_enhanced_vestibulo-ocular_reflex	cranial_nerve
Impairment_in_personality_functioning	behavior
Impairment_of_activities_of_daily_living	unclassified
Imperfect_vocal_cord_adduction	speech
Impotence	sphincter
Impulsivity	behavior
Inability_to_walk	gait
Inability_to_walk_by_childhood/adolescence	gait
Inappropriate_behavior	behavior
Inappropriate_crying	behavior
Inappropriate_laughter	behavior
Inappropriate_sexual_behavior	behavior
Inappropriate_sinus_tachycardia	unclassified
Incomitant_strabismus	eye_movements
Incomplete_congenital_stationary_night_blindness	vision
Incomplete_emptying_of_bladder	sphincter
Incomprehensible_speech	speech
Incontinence	sphincter
Incoordination	incoordination
incoordination	IncoordInatIon
Increased_axial_length_of_the_globe	vision
Increased_basal_tear_production	cranial_nerve
Increased_blood_pressure	unclassified
Increased_body_mass_index	unclassified
Increased_body_weight	unclassified
Increased_cardiac_index	unclassified
Increased_cardiac_output	unclassified
Increased_corneal_curvature	vision
Increased_cup-to-disc_ratio	vision
Increased_female_libido	unclassified
Increased_head_circumference	head
Increased_head_circumference	head
Increased_heart_rate_variability	unclassified
Increased_laxity_of_ankles	unclassified
Increased_left_ventricular_end-diastolic_volume	unclassified
Increased_libido	unclassified
Increased_male_libido	unclassified
Increased_mid-arm_muscle_circumference	miscellaneous_muscle
Increased_muscle_fatiguability	fatigue
Increased_OCT-measured_macular_thickness	vision
Increased_pitch_variability_of_speech	speech
Increased_spinal_bone_density	head
Increased_tear_production	cranial_nerve
Increased_tone_lower_limbs	hypertonia
Increased_triceps_skinfold_thickness	unclassified
Increased_upper_to_lower_segment_ratio	unclassified
Increased_vertical_cup-to-disc_ratio	vision
Increased_waist_to_hip_ratio	unclassified
Incyclophoria	eye_movements
Incyclotropia	eye_movements
Inertia	behavior
Infancy_onset_short-trunk_short_stature	unclassified
Infantile_axial_hypotonia	hypotonia
Infantile_constant_esotropia	eye_movements
Infantile_constant_exotropia	eye_movements
Infantile_muscular_hypotonia	hypotonia
Infantile_sensorineural_hearing_impairment	cranial_nerve
Infantile_spasms	seizure
Infection-related_seizure	seizure
Inferior_lens_subluxation	vision
Inferior_oblique_muscle_overaction	eye_movements
Inferior_oblique_muscle_restriction	eye_movements
Inferior_oblique_muscle_underaction	eye_movements
Inferior_oblique_muscle_weakness	eye_movements
Inferior_rectus_muscle_overaction	eye_movements
Inferior_rectus_muscle_restriction	eye_movements
Inferior_rectus_muscle_underaction	eye_movements
Inferior_rectus_muscle_weakness	eye_movements
Inferior_retinal_coloboma	vision
Infertility	unclassified
Inflexible_adherence_to_routines_or_rituals	behavior
Infra-orbital_crease	head
Infra-orbital_fold	head
Ingrown_nail	skin
Inner_retinal_layer_loss_on_macular_OCT	vision
Insomnia	sleep
Intellectual_disability_borderline	cognitive
Intellectual_disability_mild	cognitive
Intellectual_disability_moderate	cognitive
Intellectual_disability_profound	cognitive
Intellectual_disability_progressive	cognitive
Intellectual_disability_severe	cognitive
Intense_psychological_distress_to_cues	behavior
Intention_tremor	tremor
Intermittent_diarrhea	unclassified
Intermittent_microsaccadic_pursuits	eye_movements
Internal_ophthalmoplegia	eye_movements
Internuclear_ophthalmoplegia	eye_movements
Interosseus_muscle_atrophy	atrophy
Intractable_diarrhea	unclassified
Intraretinal_hyporeflective_spaces_on_macular_OCT	vision
Intrascapular_pain	pain
Intrauterine_growth_retardation	unclassified
Intrinsic_hand_muscle_atrophy	atrophy
Intrusion_symptom	behavior
Involuntary_excessive_eye_blinking	hyperkinesia
Ipsilateral_lack_of_facial_sweating	dysautonomia
Iridescent_posterior_subcapsular_cataract	vision
Iridodonesis	vision
Iris_atrophy	vision
Iris_coloboma	vision
Iris_cyst	vision
Iris_flocculi	vision
Iris_hypopigmentation	vision
Iris_nevus	vision
Iris_pigment_dispersion	vision
Iris_transillumination_defect	vision
Iritis	vision
Irregular_acetabular_roof	unclassified
Irregular_astigmatism	vision
Irregular_epiphyses	unclassified
Irregular_iliac_crest	unclassified
Irregular_menstruation	unclassified
Irritability	behavior
Isolated_diastolic_hypotension	unclassified
Isolated_systolic_hypertension	unclassified
Isometric_tremor	tremor
Ivory_epiphyses	unclassified
J-shaped_sella_turcica	head
Jamais_vu_aura	seizure
Jaundice	unclassified
Jaw_claudication	pain
Jaw_hyperreflexia	hyperreflexia
Jaw_hyporeflexia	hyporeflexia
Jaw_jerk_brisk	hyperreflexia
Jaw_pain	pain
Jerky_ocular_pursuit_movements	eye_movements
Joint_dislocation	unclassified
Joint_subluxation	unclassified
Juvenile_cataract	vision
Juvenile_epithelial_corneal_dystrophy	vision
Juvenile_posterior_subcapsular_lenticular_opacities	vision
Juvenile_rheumatoid_arthritis	unclassified
Kayser-Fleischer_ring	vision
Kernig_sign	neck
Kernig_sign_positive	neck
Kinesiophobia	behavior
Kinetic_tremor	tremor
Knee_clonus	hyperreflexia
Knee_pain	pain
Labiomental_fasciculations	atrophy
Lack_of_bowel_sounds	unclassified
Lack_of_insight	behavior
Lack_of_peer_relationships	behavior
Lack_of_spontaneous_play	behavior
Lacrimal_pump_failure	cranial_nerve
Lacrimation_abnormality	vision
Lambdoidal_craniosynostosis	head
Lamellar_cataract	vision
Lamellar_cataract_with_riders	vision
Lamellar_pulverulent_cataract	vision
Language_impairment	speech
Large_central_visual_field_defect	vision
Large_face	head
Large_fontanelles	head
Large_for_gestational_age	unclassified
Large_foramen_magnum	head
Large_forehead	head
Large_hyperpigmented_retinal_spots	vision
Large_iliac_wing	unclassified
Large_joint_dislocations	unclassified
Large_pelvis_bone	unclassified
Large_posterior_fontanelle	head
Large_sella_turcica	head
Laryngeal_dystonia	hyperkinesia
Late_chronotype	sleep
Late_systolic_murmur	unclassified
Late-onset_distal_muscle_weakness	weakness
Late-onset_proximal_muscle_weakness	weakness
Latent_hypermetropia	vision
Latent_myopia	vision
Lateral_rectus_muscle_overaction	eye_movements
Lateral_rectus_muscle_restriction	eye_movements
Lateral_rectus_muscle_underaction	eye_movements
Lateral_rectus_muscle_weakness	eye_movements
Lead_pipe_rigidity	hypertonia
Leakage_of_dye_on_fundus_fluorescein_angiography	vision
Leber_optic_atrophy	vision
Left_anterior_fascicular_block	unclassified
Left_bundle_branch_block	unclassified
Left_carotid_bruit	neck
Left_posterior_fascicular_block	unclassified
Left_unicoronal_synostosis	head
Left_unilambdoid_synostosis	head
Left_ventricular_diastolic_dysfunction	unclassified
Left_ventricular_outflow_tract_obstruction	unclassified
Left_ventricular_systolic_dysfunction	unclassified
Left-to-right_shunt	unclassified
Leg_dystonia	hyperkinesia
Leg_stiffness	hypertonia
Lens_luxation	vision
Lens_subluxation	vision
Lenticonus	vision
Lenticular_astigmatism	vision
Lentiglobus	vision
Lesters_sign	vision
Lethal_short-limbed_short_stature	unclassified
Lethal_short-trunk_short_stature	unclassified
Lethargy	sleep
Leukocoria	vision
Leukonychia	skin
Levator_palpebrae_superioris_atrophy	unclassified
Lhermitte_sign_positive	neck
Limb_apraxia	cognitive
Limb_ataxia	incoordination
Limb_dysmetria	incoordination
Limb_dystonia	hyperkinesia
Limb_hypertonia	hypertonia
Limb_muscle_weakness	weakness
Limb_myoclonus	hyperkinesia
Limb_pain	pain
Limb_spasticity	hypertonia
Limb_tremor	tremor
Limb-girdle_muscle_atrophy	atrophy
Limb-girdle_muscle_weakness	weakness
Limbal_edema	vision
Limitation_of_neck_motion	neck
Limited_extraocular_movements	eye_movements
Limited_head_rotation	neck
Limited_lateral_neck_flexion	neck
Limited_neck_extension	neck
Limited_neck_flexion	neck
Limited_neck_range_of_motion	neck
Lingual_dystonia	hyperkinesia
Lip_tremor	tremor
Localized_hirsutism	skin
Long_face	head
Long_neck	neck
Long_term_memory_impairment	cognitive
Loss_of_ability_to_walk	gait
Loss_of_ability_to_walk_in_early_childhood	gait
Loss_of_ability_to_walk_in_first_decade	gait
Loss_of_consciousness	sleep
Loss_of_control_of_movement	incoordination
Loss_of_equilibrium	gait
Loss_of_facial_expression	hypokinesia
Loss_of_speech	speech
Loss_of_voice	speech
Loud_first_heart_sound	unclassified
Low_anterior_hairline	head
Low_back_pain	pain
Low_frustration_tolerance	behavior
Low_posterior_hairline	neck
Low_self_esteem	behavior
Low-frequency_hearing_loss	cranial_nerve
Low-frequency_sensorineural_hearing_impairment	cranial_nerve
Low-output_congestive_heart_failure	unclassified
Low-to-normal_blood_pressure	unclassified
Lower_cranial_nerve_dysfunction	cranial_nerve
Lower_extremity_joint_dislocation	unclassified
Lower_limb_amyotrophy	atrophy
Lower_limb_dysmetria	incoordination
Lower_limb_dystonia	hyperkinesia
Lower_limb_hyperreflexia	hyperreflexia
Lower_limb_hypertonia	hypertonia
Lower_limb_muscle_weakness	weakness
Lower_limb_pain	pain
Lower_limb_spasticity	hypertonia
Lumbar_hypertrichosis	skin
Lumbosacral_hirsutism	skin
Macrocephaly	head
Macrocephaly	head
Macrocephaly_at_birth	head
Macrosaccadic_oscillations	eye_movements
Macrosquare-wave_jerks	eye_movements
Maintenance_insomnia	sleep
Malaise	fatigue
Malalignment_of_the_great_toenail	skin
Malar_flattening	head
Malar_prominence	head
Male_anorgasmia	unclassified
Male_infertility	unclassified
Male_sexual_dysfunction	sphincter
Male_sexual_dysfunction	unclassified
Malnutrition	unclassified
Mandibular_hyperostosis	head
Mandibulofacial_dysostosis	head
Mania	behavior
Marche_a_petits_pas	hypokinesia
Marcus_Gunn_jaw_winking_synkinesis	eye_movements
Marcus_Gunn_pupil	vision
Marked_muscular_hypertrophy	miscellaneous_muscle
Mask-like_facies	hypokinesia
Mastoiditis	head
Medial_rectus_muscle_overaction	eye_movements
Medial_rectus_muscle_restriction	eye_movements
Medial_rectus_muscle_underaction	eye_movements
Medial_rectus_muscle_weakness	eye_movements
Megalocornea	vision
Meige_syndrome	hyperkinesia
Melanonychia	skin
Membranous_cataract	vision
Membranous_vitreous_appearance	vision
Memory_impairment	cognitive
Meningism	neck
Menometrorrhagia	unclassified
Mental_deterioration	cognitive
Mesomelic_short_stature	unclassified
Metamorphopsia	vision
Methamphetamine_addiction	behavior
Methylphenidate_addiction	behavior
Metopic_depression	head
Metopic_suture_patent_to_nasal_root	head
Metopic_synostosis	head
Metrorrhagia	unclassified
Microcephaly	head
Microcornea	vision
Micrographia	hypokinesia
Microsaccadic_pursuit	eye_movements
Microtropia	eye_movements
Microtropia_with_identity	eye_movements
Microtropia_without_identity	eye_movements
Mid-frequency_hearing_loss	cranial_nerve
Middiastolic_murmur	unclassified
Midline_skin_dimples_over_anterior/posterior_fontanelles	head
Midsystolic_murmur	unclassified
Migraine	pain
Migraine_with_aura	pain
Migraine_without_aura	pain
Migrating_focal_seizure	seizure
Migratory_arthritis	unclassified
Mild_constriction_of_peripheral_visual_field	vision
Mild_hearing_impairment	cranial_nerve
Mild_hypermetropia	vision
Mild_intrauterine_growth_retardation	unclassified
Mild_microcephaly	head
Mild_myopia	vision
Mild_neurosensory_hearing_impairment	cranial_nerve
Mild_postnatal_growth_retardation	unclassified
Mild_short_stature	unclassified
Mildly_reduced_contrast_sensitivity	vision
Mildly_reduced_visual_acuity	vision
Miosis	vision
Misophonia	cranial_nerve
Mitral_regurgitation	unclassified
Mitral_stenosis	unclassified
Mixed_astigmatism	vision
Mizuo_phenomenon	vision
Mobitz_I_atrioventricular_block	unclassified
Mobitz_II_atrioventricular_block	unclassified
Moderate_constriction_of_peripheral_visual_field	vision
Moderate_hearing_impairment	cranial_nerve
Moderate_hypermetropia	vision
Moderate_intrauterine_growth_retardation	unclassified
Moderate_myopia	tremor
Moderate_postnatal_growth_retardation	unclassified
Moderate_sensorineural_hearing_impairment	cranial_nerve
Moderately_reduced_contrast_sensitivity	vision
Moderately_reduced_visual_acuity	vision
Moderately_short_stature	unclassified
Monochromacy	vision
Monocular_horizontal_nystagmus	eye_movements
Monocular_strabismus	eye_movements
Monotonic_speech	speech
Mood_swings	behavior
Moon_facies	head
Morning_glory_anomaly	vision
Morning_myoclonic_jerks	hyperkinesia
Motor_deterioration	cognitive
Motor_impersistence	cognitive
Motor_seizure	seizure
Motor_tic	hyperkinesia
Motor_tics	hyperkinesia
Mucoid_diarrhea	unclassified
Multifocal_neonatal_sequential_seizure	seizure
Multifocal_seizures	seizure
Multiple_bilateral_congenital_hypertrophy_of_retinal_pigment_epithelium	vision
Multiple_joint_dislocation	unclassified
Multiple_suture_craniosynostosis	head
Muscle_cramps	miscellaneous_muscle
Muscle_fatigue	fatigue
Muscle_flaccidity	hypotonia
Muscle_hypertrophy	miscellaneous_muscle
Muscle_hypertrophy_of_the_lower_extremities	miscellaneous_muscle
Muscle_mounding	miscellaneous_muscle
Muscle_spasm	miscellaneous_muscle
Muscle_tenderness	miscellaneous_muscle
Muscle_tightness	miscellaneous_muscle
Muscle_twitching	miscellaneous_muscle
Muscle_weakness	weakness
Muscular_hypotonia_of_the_trunk	unclassified
Music-induced_seizure	seizure
Musty_odor	unclassified
Mutism	speech
Myalgia	pain
Mydriasis	vision
Myedema	miscellaneous_muscle
[truncated: 946 more rows]
